# Supplementary material for: Understanding thioamitide biosynthesis using pathway engineering and untargeted metabolomics
Source: Royal Society of Chemistry journal article supplement (doi:10.1039/d0sc06835g), 2021-01-01
Supplement: d0sc06835g3.cys [file d0sc06835g3.cys]

Archive with 38 entries (38 files):
- CytoscapeSession-2021_03_29-10_56/3.0.0.version
- CytoscapeSession-2021_03_29-10_56/networks/35-cc_1.to.202.txt.xgmml
- CytoscapeSession-2021_03_29-10_56/views/61-32257-cc_1.to.202.txt.xgmml
- CytoscapeSession-2021_03_29-10_56/tables/51-51/LOCAL_ATTRS-org.cytoscape.model.CyNetwork-51+default+network.cytable
- CytoscapeSession-2021_03_29-10_56/tables/35-cc_1.to.202.txt/HIDDEN-org.cytoscape.model.CyNetwork-35+hidden+network.cytable
- CytoscapeSession-2021_03_29-10_56/tables/35-cc_1.to.202.txt/LOCAL_ATTRS-org.cytoscape.model.CyEdge-cc_1.to.202.txt+root+default++edge.cytable
- CytoscapeSession-2021_03_29-10_56/tables/61-cc_1.to.202.txt/HIDDEN-org.cytoscape.model.CyEdge-61+hidden+edge.cytable
- CytoscapeSession-2021_03_29-10_56/tables/35-cc_1.to.202.txt/LOCAL_ATTRS-org.cytoscape.model.CyNetwork-cc_1.to.202.txt+root+default++network.cytable
- CytoscapeSession-2021_03_29-10_56/tables/51-51/LOCAL_ATTRS-org.cytoscape.model.CyNode-51+default+node.cytable
- CytoscapeSession-2021_03_29-10_56/tables/61-cc_1.to.202.txt/LOCAL_ATTRS-org.cytoscape.model.CyEdge-cc_1.to.202.txt+default+edge.cytable
- CytoscapeSession-2021_03_29-10_56/tables/35-cc_1.to.202.txt/HIDDEN-org.cytoscape.model.CyEdge-35+hidden+edge.cytable
- CytoscapeSession-2021_03_29-10_56/tables/35-cc_1.to.202.txt/HIDDEN-org.cytoscape.model.CyNode-35+hidden+node.cytable
- CytoscapeSession-2021_03_29-10_56/tables/61-cc_1.to.202.txt/HIDDEN-org.cytoscape.model.CyNetwork-61+hidden+network.cytable
- CytoscapeSession-2021_03_29-10_56/tables/61-cc_1.to.202.txt/LOCAL_ATTRS-org.cytoscape.model.CyNode-cc_1.to.202.txt+default+node.cytable
- CytoscapeSession-2021_03_29-10_56/tables/35-cc_1.to.202.txt/SHARED_ATTRS-org.cytoscape.model.CyNetwork-cc_1.to.202.txt+root+shared++network.cytable
- CytoscapeSession-2021_03_29-10_56/tables/35-cc_1.to.202.txt/SHARED_ATTRS-org.cytoscape.model.CyNode-cc_1.to.202.txt+root+shared++node.cytable
- CytoscapeSession-2021_03_29-10_56/tables/35-cc_1.to.202.txt/SHARED_ATTRS-org.cytoscape.model.CyEdge-cc_1.to.202.txt+root+shared++edge.cytable
- CytoscapeSession-2021_03_29-10_56/tables/51-51/HIDDEN-org.cytoscape.model.CyNetwork-51+hidden+network.cytable
- CytoscapeSession-2021_03_29-10_56/tables/35-cc_1.to.202.txt/LOCAL_ATTRS-org.cytoscape.model.CyNode-cc_1.to.202.txt+root+default++node.cytable
- CytoscapeSession-2021_03_29-10_56/tables/51-51/HIDDEN-org.cytoscape.model.CyEdge-51+hidden+edge.cytable
- CytoscapeSession-2021_03_29-10_56/tables/61-cc_1.to.202.txt/HIDDEN-org.cytoscape.model.CyNode-61+hidden+node.cytable
- CytoscapeSession-2021_03_29-10_56/tables/51-51/HIDDEN-org.cytoscape.model.CyNode-51+hidden+node.cytable
- CytoscapeSession-2021_03_29-10_56/tables/51-51/LOCAL_ATTRS-org.cytoscape.model.CyEdge-51+default+edge.cytable
- CytoscapeSession-2021_03_29-10_56/tables/61-cc_1.to.202.txt/LOCAL_ATTRS-org.cytoscape.model.CyNetwork-cc_1.to.202.txt+default+network.cytable
- CytoscapeSession-2021_03_29-10_56/tables/cytables.xml
- CytoscapeSession-2021_03_29-10_56/session_vizmap.xml
- CytoscapeSession-2021_03_29-10_56/properties/groupSettings.props
- CytoscapeSession-2021_03_29-10_56/properties/session_bookmarks.xml
- CytoscapeSession-2021_03_29-10_56/session_thumbnail.png
- CytoscapeSession-2021_03_29-10_56/apps/org.cytoscape.ding.customgraphicsmgr/image_metadata.props
- CytoscapeSession-2021_03_29-10_56/apps/org.cytoscape.swing-application/session_state.xml
- CytoscapeSession-2021_03_29-10_56/apps/org.cytoscape.swing-application/network_list.xml
- CytoscapeSession-2021_03_29-10_56/apps/org.cytoscape.filter/filters.json
- CytoscapeSession-2021_03_29-10_56/apps/org.cytoscape.filter/filterChains.json
- CytoscapeSession-2021_03_29-10_56/apps/org.cytoscape.browser/UnassignedTables.props
- CytoscapeSession-2021_03_29-10_56/apps/org.cytoscape.browser/NetworkTable.props
- CytoscapeSession-2021_03_29-10_56/apps/org.cytoscape.browser/EdgeTable.props
- CytoscapeSession-2021_03_29-10_56/apps/org.cytoscape.browser/NodeTable.props
