# Supplementary material for: Understanding thioamitide biosynthesis using pathway engineering and untargeted metabolomics
Source: Royal Society of Chemistry journal article supplement (doi:10.1039/d0sc06835g), 2021-01-01
Supplement: d0sc06835g3.cys [file d0sc06835g3.cys › CytoscapeSession-2021_03_29-10_56/apps/org.cytoscape.browser/EdgeTable.props]

cc_1.to.202.txt default edge	0	SUID	false
cc_1.to.202.txt default edge	1	selected	false
cc_1.to.202.txt default edge	2	shared name	true
cc_1.to.202.txt default edge	3	shared interaction	true
cc_1.to.202.txt default edge	4	name	true
cc_1.to.202.txt default edge	5	interaction	true
cc_1.to.202.txt default edge	6	HIT%ID	true
cc_1.to.202.txt default edge	7	SS%ID	true
cc_1.to.202.txt default edge	8	EVALUE	true
cc_1.to.202.txt default edge	9	MIN_COV_OPT	true
