# Supplementary material for: Understanding thioamitide biosynthesis using pathway engineering and untargeted metabolomics
Source: Royal Society of Chemistry journal article supplement (doi:10.1039/d0sc06835g), 2021-01-01
Supplement: d0sc06835g3.cys [file d0sc06835g3.cys › CytoscapeSession-2021_03_29-10_56/apps/org.cytoscape.browser/NodeTable.props]

cc_1.to.202.txt default node	0	SUID	false
cc_1.to.202.txt default node	1	selected	false
cc_1.to.202.txt default node	2	shared name	true
cc_1.to.202.txt default node	3	name	true
cc_1.to.202.txt default node	4	Accession	true
cc_1.to.202.txt default node	5	Colour	true
cc_1.to.202.txt default node	6	Genus	true
cc_1.to.202.txt default node	7	hdesc	true
cc_1.to.202.txt default node	8	hname	true
cc_1.to.202.txt default node	9	Network	true
cc_1.to.202.txt default node	10	Organism	true
cc_1.to.202.txt default node	11	PP_TE_Distance	true
cc_1.to.202.txt default node	12	PPSerial	true
cc_1.to.202.txt default node	13	Prodigalscore	true
cc_1.to.202.txt default node	14	SameStrand	true
cc_1.to.202.txt default node	15	Sequence	true
cc_1.to.202.txt default node	16	signif	true
