# Supplementary material for: Understanding thioamitide biosynthesis using pathway engineering and untargeted metabolomics
Source: Royal Society of Chemistry journal article supplement (doi:10.1039/d0sc06835g), 2021-01-01
Supplement: d0sc06835g3.cys [file d0sc06835g3.cys › CytoscapeSession-2021_03_29-10_56/apps/org.cytoscape.swing-application/session_state.xml]

<?xml version="1.0" encoding="UTF-8" standalone="yes"?>
<sessionState documentVersion="1.1">
    <cytopanels>
        <cytopanel id="CytoPanel1">
            <panelState>DOCK</panelState>
            <panelStateInternal>DOCK</panelStateInternal>
            <selectedPanel>1</selectedPanel>
        </cytopanel>
        <cytopanel id="CytoPanel2">
            <panelState>DOCK</panelState>
            <panelStateInternal>DOCK</panelStateInternal>
            <selectedPanel>0</selectedPanel>
        </cytopanel>
        <cytopanel id="CytoPanel3">
            <panelState>HIDE</panelState>
            <panelStateInternal>DOCK</panelStateInternal>
            <selectedPanel>-1</selectedPanel>
        </cytopanel>
    </cytopanels>
</sessionState>
