# Supplementary material for: Understanding thioamitide biosynthesis using pathway engineering and untargeted metabolomics
Source: Royal Society of Chemistry journal article supplement (doi:10.1039/d0sc06835g), 2021-01-01
Supplement: d0sc06835g3.cys [file d0sc06835g3.cys › CytoscapeSession-2021_03_29-10_56/networks/35-cc_1.to.202.txt.xgmml]

<?xml version="1.0" encoding="UTF-8" standalone="yes"?>
<graph id="35" label="cc_1.to.202.txt" cy:view="0" cy:registered="0" cy:documentVersion="3.0" xmlns:dc="http://purl.org/dc/elements/1.1/" xmlns:xlink="http://www.w3.org/1999/xlink" xmlns:rdf="http://www.w3.org/1999/02/22-rdf-syntax-ns#" xmlns:cy="http://www.cytoscape.org" xmlns="http://www.cs.rpi.edu/XGMML">
  <att>
    <graph id="51" label="51" cy:registered="0">
    </graph>
  </att>
  <att>
    <graph id="61" label="cc_1.to.202.txt" cy:registered="1">
      <node id="32255" label="WP_089126836_2"/>
      <node id="32254" label="WP_089126833_2"/>
      <node id="32252" label="WP_106218514_2"/>
      <node id="32251" label="WP_016864763_5"/>
      <node id="32249" label="SNT25203_2"/>
      <node id="32248" label="AWS47415_1"/>
      <node id="32246" label="WP_096594214_1"/>
      <node id="32245" label="WP_045869173_1"/>
      <node id="32243" label="AOX46105_1"/>
      <node id="32242" label="WP_159529421_2"/>
      <node id="32240" label="WP_145487439_3"/>
      <node id="32239" label="WP_079189213_3"/>
      <node id="32237" label="WP_103138325_6"/>
      <node id="32236" label="AVH79607_3"/>
      <node id="32234" label="WP_006622760_10"/>
      <node id="32233" label="WP_006619051_3"/>
      <node id="32231" label="WP_138989358_1"/>
      <node id="32230" label="WP_150881471_1"/>
      <node id="32228" label="WP_096576757_2"/>
      <node id="32227" label="WP_096576751_2"/>
      <node id="32225" label="WP_073591536_7"/>
      <node id="32224" label="WP_045869173_3"/>
      <node id="32222" label="WP_096659345_2"/>
      <node id="32221" label="WP_015116255_1"/>
      <node id="32219" label="WP_106331017_1"/>
      <node id="32218" label="WP_129202808_4"/>
      <node id="32216" label="WP_123798532_3"/>
      <node id="32215" label="WP_125690181_2"/>
      <node id="32213" label="WP_096590413_1"/>
      <node id="32212" label="WP_096590410_1"/>
      <node id="32210" label="AVH79456_5"/>
      <node id="32209" label="TVP63782_6"/>
      <node id="32207" label="RNJ67588_1"/>
      <node id="32206" label="WP_088888836_2"/>
      <node id="32204" label="WP_155752488_2"/>
      <node id="32203" label="WP_017743137_2"/>
      <node id="32201" label="WP_130690339_1"/>
      <node id="32200" label="WP_131076036_1"/>
      <node id="32198" label="WP_096681247_1"/>
      <node id="32197" label="WP_015140719_2"/>
      <node id="32195" label="WP_121024930_2"/>
      <node id="32194" label="WP_051857755_3"/>
      <node id="32192" label="WP_145385118_2"/>
      <node id="32191" label="WP_095739934_1"/>
      <node id="32189" label="WP_017743137_5"/>
      <node id="32188" label="WP_155752488_4"/>
      <node id="32186" label="WP_062451377_3"/>
      <node id="32185" label="WP_067652746_4"/>
      <node id="32183" label="WP_068028504_4"/>
      <node id="32182" label="WP_084520237_4"/>
      <node id="32180" label="WP_169264744_3"/>
      <node id="32179" label="WP_169264746_3"/>
      <node id="32177" label="KQP70226_3"/>
      <node id="32176" label="WP_045296661_3"/>
      <node id="32174" label="WP_156170590_2"/>
      <node id="32173" label="WP_131076036_2"/>
      <node id="32171" label="OGQ08743_2"/>
      <node id="32170" label="WP_124970176_3"/>
      <node id="32168" label="WP_045296661_1"/>
      <node id="32167" label="KQP70226_1"/>
      <node id="32165" label="WP_172358022_1"/>
      <node id="32164" label="BAU44627_2"/>
      <node id="32162" label="WP_096680266_2"/>
      <node id="32161" label="WP_010996620_3"/>
      <node id="32159" label="WP_070396421_1"/>
      <node id="32158" label="WP_096681247_7"/>
      <node id="32156" label="WP_093601002_8"/>
      <node id="32155" label="WP_093116829_1"/>
      <node id="32153" label="WP_127056592_3"/>
      <node id="32152" label="WP_016950293_2"/>
      <node id="32150" label="WP_052808529_3"/>
      <node id="32149" label="WP_049976882_2"/>
      <node id="32147" label="WP_155752488_1"/>
      <node id="32146" label="WP_017743137_1"/>
      <node id="32144" label="RCJ25607_1"/>
      <node id="32143" label="AFY52807_6"/>
      <node id="32141" label="WP_086837411_2"/>
      <node id="32140" label="WP_096594214_3"/>
      <node id="32138" label="WP_016863105_1"/>
      <node id="32137" label="WP_017311237_2"/>
      <node id="32135" label="WP_114082527_1"/>
      <node id="32134" label="WP_012409362_1"/>
      <node id="32132" label="WP_019495762_2"/>
      <node id="32131" label="WP_127078868_2"/>
      <node id="32129" label="WP_096575011_8"/>
      <node id="32128" label="WP_015113151_5"/>
      <node id="32126" label="WP_102116354_3"/>
      <node id="32125" label="WP_110163988_3"/>
      <node id="32123" label="TVP62142_3"/>
      <node id="32122" label="WP_006196066_4"/>
      <node id="32120" label="WP_067598320_1"/>
      <node id="32119" label="WP_087103312_1"/>
      <node id="32117" label="WP_047015652_3"/>
      <node id="32116" label="WP_051642643_3"/>
      <node id="32114" label="WP_096680266_4"/>
      <node id="32113" label="WP_010996620_4"/>
      <node id="32111" label="WP_131089594_3"/>
      <node id="32110" label="WP_061955677_3"/>
      <node id="32108" label="WP_071107270_3"/>
      <node id="32107" label="WP_070396036_2"/>
      <node id="32105" label="WP_138897977_2"/>
      <node id="32104" label="TCM33822_1"/>
      <node id="32102" label="AWS47415_4"/>
      <node id="32101" label="SNT25203_5"/>
      <node id="32099" label="WP_083782609_1"/>
      <node id="32098" label="PSB62113_1"/>
      <node id="32096" label="WP_096604516_2"/>
      <node id="32095" label="WP_124200676_2"/>
      <node id="32093" label="WP_010996620_2"/>
      <node id="32092" label="WP_096680266_3"/>
      <node id="32090" label="WP_110256027_2"/>
      <node id="32089" label="WP_162060722_3"/>
      <node id="32087" label="WP_109497443_5"/>
      <node id="32086" label="WP_109497443_6"/>
      <node id="32084" label="WP_125821548_3"/>
      <node id="32083" label="WP_051840628_2"/>
      <node id="32081" label="WP_018486514_2"/>
      <node id="32080" label="WP_168880027_5"/>
      <node id="32078" label="WP_061955677_6"/>
      <node id="32077" label="WP_131089594_4"/>
      <node id="32075" label="WP_168880027_1"/>
      <node id="32074" label="WP_168880029_1"/>
      <node id="32072" label="WP_162681093_1"/>
      <node id="32071" label="WP_096547181_1"/>
      <node id="32069" label="WP_169264744_2"/>
      <node id="32068" label="WP_169264746_2"/>
      <node id="32066" label="OGQ08743_4"/>
      <node id="32065" label="WP_124970176_10"/>
      <node id="32063" label="WP_016863105_2"/>
      <node id="32062" label="WP_017311237_3"/>
      <node id="32060" label="WP_089126836_3"/>
      <node id="32059" label="WP_089126833_3"/>
      <node id="32057" label="WP_073619916_2"/>
      <node id="32056" label="WP_073619916_3"/>
      <node id="32054" label="WP_124142959_2"/>
      <node id="32053" label="WP_124155194_3"/>
      <node id="32051" label="WP_008380405_1"/>
      <node id="32050" label="AOX46105_4"/>
      <node id="32048" label="WP_017743137_4"/>
      <node id="32047" label="WP_155752488_3"/>
      <node id="32045" label="WP_006622760_11"/>
      <node id="32044" label="WP_006622760_12"/>
      <node id="32042" label="TAE59458_9010"/>
      <node id="32041" label="WP_015078657_8"/>
      <node id="32039" label="WP_096576757_3"/>
      <node id="32038" label="WP_096576751_3"/>
      <node id="32036" label="AYJ47579_1"/>
      <node id="32035" label="WP_026723183_3"/>
      <node id="32033" label="WP_030061393_3"/>
      <node id="32032" label="WP_016898474_2"/>
      <node id="32030" label="WP_109595189_6"/>
      <node id="32029" label="WP_093619522_6"/>
      <node id="32027" label="WP_051837683_6"/>
      <node id="32026" label="WP_155387558_1"/>
      <node id="32024" label="TKB91729_3"/>
      <node id="32023" label="TKB91729_6"/>
      <node id="32021" label="WP_096605992_7"/>
      <node id="32020" label="WP_008180360_7"/>
      <node id="32018" label="WP_089091039_6"/>
      <node id="32017" label="WP_006195640_3"/>
      <node id="32015" label="WP_067598320_2"/>
      <node id="32014" label="WP_087103312_2"/>
      <node id="32012" label="WP_073642495_1"/>
      <node id="32011" label="RCJ25433_2"/>
      <node id="32009" label="WP_058047489_4"/>
      <node id="32008" label="WP_120754718_4"/>
      <node id="32006" label="BAZ30575_2"/>
      <node id="32005" label="WP_075895564_1"/>
      <node id="32003" label="WP_110163988_1"/>
      <node id="32002" label="WP_102116354_1"/>
      <node id="32000" label="WP_015207767_2"/>
      <node id="31999" label="WP_015207763_2"/>
      <node id="31997" label="WP_107961734_1"/>
      <node id="31996" label="WP_128453384_1"/>
      <node id="31994" label="WP_082604641_3"/>
      <node id="31993" label="WP_079291565_3"/>
      <node id="31991" label="WP_156664522_2"/>
      <node id="31990" label="WP_156664522_1"/>
      <node id="31988" label="WP_014173637_1"/>
      <node id="31987" label="WP_089505437_2"/>
      <node id="31985" label="WP_086837411_1"/>
      <node id="31984" label="WP_096604516_1"/>
      <node id="31982" label="WP_006197379_1"/>
      <node id="31981" label="BBD66616_4"/>
      <node id="31979" label="WP_013321440_2"/>
      <node id="31978" label="WP_049802506_3"/>
      <node id="31976" label="WP_108116368_1"/>
      <node id="31975" label="WP_052752730_2"/>
      <node id="31973" label="WP_162060722_2"/>
      <node id="31972" label="WP_110256027_1"/>
      <node id="31970" label="WP_087542717_6"/>
      <node id="31969" label="RCJ31639_1"/>
      <node id="31967" label="AFY52807_5"/>
      <node id="31966" label="WP_118166682_5"/>
      <node id="31964" label="WP_047015652_1"/>
      <node id="31963" label="WP_051642643_1"/>
      <node id="31961" label="WP_116947187_3"/>
      <node id="31960" label="WP_069110514_3"/>
      <node id="31958" label="WP_146082522_3"/>
      <node id="31957" label="WP_094261964_2"/>
      <node id="31955" label="WP_168880027_2"/>
      <node id="31954" label="WP_168880029_2"/>
      <node id="31952" label="WP_137908690_1"/>
      <node id="31951" label="BAZ86949_2"/>
      <node id="31949" label="WP_015111489_1"/>
      <node id="31948" label="WP_096583741_2"/>
      <node id="31946" label="WP_062294404_1"/>
      <node id="31945" label="WP_013190653_2"/>
      <node id="31943" label="WP_086820173_2"/>
      <node id="31942" label="WP_086820178_2"/>
      <node id="31940" label="WP_068099584_4"/>
      <node id="31939" label="WP_068150862_4"/>
      <node id="31936" label="WP_051837683_2"/>
      <node id="31934" label="WP_052680420_5"/>
      <node id="31933" label="WP_051700182_3"/>
      <node id="31930" label="WP_153354547_2"/>
      <node id="31928" label="WP_141683807_1"/>
      <node id="31927" label="WP_052158149_1"/>
      <node id="31924" label="SFK92261_3"/>
      <node id="31922" label="WP_125792341_1"/>
      <node id="31921" label="WP_093601002_6"/>
      <node id="31918" label="WP_168880029_3"/>
      <node id="31916" label="WP_018486514_4"/>
      <node id="31915" label="WP_168880027_4"/>
      <node id="31912" label="KQP70226_2"/>
      <node id="31910" label="WP_045296661_2"/>
      <node id="31909" label="WP_116195863_2"/>
      <node id="31907" label="WP_030169499_1"/>
      <node id="31905" label="WP_084890433_1"/>
      <node id="31904" label="WP_141936425_1"/>
      <node id="31901" label="WP_051700182_5"/>
      <node id="31899" label="WP_052680420_6"/>
      <node id="31898" label="WP_051837683_7"/>
      <node id="31895" label="WP_055472496_2"/>
      <node id="31893" label="WP_157777555_2"/>
      <node id="31892" label="WP_171084023_2"/>
      <node id="31889" label="WP_167727925_1"/>
      <node id="31887" label="WP_096592804_1"/>
      <node id="31886" label="WP_073619916_1"/>
      <node id="31883" label="WP_051715083_2"/>
      <node id="31881" label="WP_095933898_1"/>
      <node id="31880" label="WP_051859750_1"/>
      <node id="31877" label="WP_096622718_3"/>
      <node id="31875" label="WP_107115831_2"/>
      <node id="31874" label="WP_097866484_3"/>
      <node id="31871" label="WP_168643398_5"/>
      <node id="31869" label="WP_073591536_6"/>
      <node id="31868" label="WP_012409787_7"/>
      <node id="31865" label="WP_006622760_4"/>
      <node id="31863" label="WP_006622760_6"/>
      <node id="31862" label="WP_006619051_1"/>
      <node id="31859" label="WP_165975342_2"/>
      <node id="31857" label="WP_165975342_4"/>
      <node id="31856" label="WP_165975342_5"/>
      <node id="31853" label="WP_069110514_2"/>
      <node id="31851" label="WP_116947187_2"/>
      <node id="31850" label="WP_092614753_2"/>
      <node id="31847" label="WP_112963677_1"/>
      <node id="31845" label="WP_067652746_1"/>
      <node id="31844" label="WP_042619690_1"/>
      <node id="31841" label="WP_172358022_2"/>
      <node id="31839" label="RMF68567_2"/>
      <node id="31838" label="BAU44627_5"/>
      <node id="31836" label="WP_093601002_3"/>
      <node id="31834" label="WP_125792341_3"/>
      <node id="31833" label="SFK92261_4"/>
      <node id="31830" label="WP_104386798_3"/>
      <node id="31828" label="WP_008232444_3"/>
      <node id="31827" label="WP_017315790_2"/>
      <node id="31825" label="AGP61345_2"/>
      <node id="31823" label="WP_079291565_2"/>
      <node id="31822" label="WP_082604641_1"/>
      <node id="31819" label="WP_068099584_1"/>
      <node id="31817" label="ANI93503_4"/>
      <node id="31816" label="WP_068150862_1"/>
      <node id="31814" label="AVH79662_5"/>
      <node id="31812" label="WP_096679519_6"/>
      <node id="31811" label="AVH79628_7"/>
      <node id="31808" label="WP_096537288_1"/>
      <node id="31806" label="OUC15299_1"/>
      <node id="31805" label="WP_138498765_1"/>
      <node id="31802" label="WP_068028504_5"/>
      <node id="31800" label="PIR21572_3"/>
      <node id="31799" label="WP_084520237_5"/>
      <node id="31796" label="WP_141310912_4"/>
      <node id="31794" label="WP_093908736_3"/>
      <node id="31793" label="WP_031017311_3"/>
      <node id="31790" label="WP_103811802_1"/>
      <node id="31788" label="WP_087811088_1"/>
      <node id="31787" label="WP_059262025_1"/>
      <node id="31784" label="WP_094345265_2"/>
      <node id="31782" label="WP_109006830_3"/>
      <node id="31781" label="WP_118166682_3"/>
      <node id="31778" label="WP_138498765_3"/>
      <node id="31776" label="WP_086837411_3"/>
      <node id="31775" label="WP_015126776_3"/>
      <node id="31772" label="WP_008180360_3"/>
      <node id="31770" label="WP_008180360_2"/>
      <node id="31769" label="WP_008180360_1"/>
      <node id="31767" label="BAZ80283_3"/>
      <node id="31765" label="AGP61345_3"/>
      <node id="31764" label="WP_071187741_3"/>
      <node id="31761" label="WP_035905443_2"/>
      <node id="31759" label="WP_055421432_1"/>
      <node id="31758" label="WP_053706403_1"/>
      <node id="31755" label="WP_017655478_1"/>
      <node id="31753" label="WP_103138325_2"/>
      <node id="31752" label="WP_015140719_1"/>
      <node id="31749" label="WP_049976882_3"/>
      <node id="31747" label="WP_052808529_2"/>
      <node id="31746" label="WP_164394909_2"/>
      <node id="31743" label="WP_164496180_2"/>
      <node id="31741" label="WP_060892878_5"/>
      <node id="31740" label="ROV70439_4"/>
      <node id="31737" label="WP_168645325_5"/>
      <node id="31735" label="WP_148763415_4"/>
      <node id="31734" label="WP_027402982_4"/>
      <node id="31731" label="WP_103138325_8"/>
      <node id="31729" label="WP_017655478_2"/>
      <node id="31728" label="WP_015140719_3"/>
      <node id="31725" label="WP_106331017_3"/>
      <node id="31723" label="WP_109595189_3"/>
      <node id="31722" label="WP_093619522_2"/>
      <node id="31719" label="WP_094345265_1"/>
      <node id="31717" label="WP_118166682_2"/>
      <node id="31716" label="WP_109006830_1"/>
      <node id="31713" label="TCK41348_1"/>
      <node id="31711" label="WP_094261964_1"/>
      <node id="31710" label="WP_146082522_1"/>
      <node id="31706" label="WP_027402982_5"/>
      <node id="31703" label="WP_104387267_2"/>
      <node id="31701" label="WP_168496018_2"/>
      <node id="31700" label="WP_168501874_3"/>
      <node id="31696" label="WP_167721203_7"/>
      <node id="31693" label="WP_096589596_9"/>
      <node id="31691" label="WP_104899482_5"/>
      <node id="31690" label="WP_086760950_8"/>
      <node id="31687" label="BAU44627_3"/>
      <node id="31684" label="RCJ34841_2"/>
      <node id="31682" label="WP_096620836_2"/>
      <node id="31681" label="BAZ15600_1"/>
      <node id="31678" label="WP_054237388_1"/>
      <node id="31675" label="WP_153461219_1"/>
      <node id="31673" label="WP_015659226_3"/>
      <node id="31672" label="WP_060892878_1"/>
      <node id="31667" label="WP_159037419_2"/>
      <node id="31665" label="WP_039653089_2"/>
      <node id="31663" label="WP_046417231_2"/>
      <node id="31662" label="BBC15200_2"/>
      <node id="31658" label="WP_114901352_1"/>
      <node id="31655" label="WP_007095313_1"/>
      <node id="31653" label="WP_052752730_1"/>
      <node id="31652" label="WP_053002257_1"/>
      <node id="31647" label="WP_141366901_1"/>
      <node id="31645" label="WP_162681093_2"/>
      <node id="31643" label="WP_096547181_3"/>
      <node id="31642" label="WP_037567380_1"/>
      <node id="31639" label="WP_047775239_2"/>
      <node id="31638" label="WP_166925083_1"/>
      <node id="31636" label="WP_047775239_1"/>
      <node id="31635" label="RZJ53728_2"/>
      <node id="31630" label="WP_008180360_5"/>
      <node id="31628" label="WP_008180360_8"/>
      <node id="31626" label="WP_087592205_10"/>
      <node id="31625" label="WP_008180360_6"/>
      <node id="31620" label="WP_086835908_9004"/>
      <node id="31618" label="WP_086835908_9007"/>
      <node id="31616" label="WP_086835908_9006"/>
      <node id="31615" label="WP_086835908_9005"/>
      <node id="31611" label="WP_099700413_5"/>
      <node id="31608" label="WP_105222244_4"/>
      <node id="31606" label="WP_096597905_1"/>
      <node id="31605" label="WP_015189896_4"/>
      <node id="31602" label="WP_125690181_3"/>
      <node id="31600" label="KKT87137_2"/>
      <node id="31598" label="WP_068208510_3"/>
      <node id="31597" label="WP_068252194_3"/>
      <node id="31592" label="OBQ23191_1"/>
      <node id="31590" label="WP_027403439_1"/>
      <node id="31588" label="WP_168646604_1"/>
      <node id="31587" label="BAZ86949_1"/>
      <node id="31582" label="WP_073619367_2"/>
      <node id="31580" label="TWH40986_2"/>
      <node id="31578" label="WP_026093360_2"/>
      <node id="31577" label="BAZ15600_3"/>
      <node id="31573" label="WP_015193424_2"/>
      <node id="31572" label="WP_015193424_1"/>
      <node id="31570" label="WP_109003510_1"/>
      <node id="31569" label="WP_016495430_1"/>
      <node id="31567" label="WP_141936425_5"/>
      <node id="31564" label="WP_137451632_5"/>
      <node id="31562" label="WP_078760724_3"/>
      <node id="31560" label="AWS47415_7"/>
      <node id="31559" label="WP_170198719_3"/>
      <node id="31554" label="WP_062437448_5"/>
      <node id="31550" label="WP_161483240_5"/>
      <node id="31547" label="WP_137248807_5"/>
      <node id="31545" label="WP_030452416_5"/>
      <node id="31544" label="WP_062348671_5"/>
      <node id="31536" label="WP_051642643_2"/>
      <node id="31534" label="TDT36016_4"/>
      <node id="31532" label="WP_159425396_2"/>
      <node id="31530" label="WP_051368293_2"/>
      <node id="31529" label="WP_047015652_2"/>
      <node id="31521" label="WP_099071810_5"/>
      <node id="31519" label="RCJ14929_7"/>
      <node id="31517" label="WP_096536886_7"/>
      <node id="31515" label="WP_096559014_2"/>
      <node id="31514" label="WP_073644071_7"/>
      <node id="31508" label="WP_135099815_3"/>
      <node id="31504" label="WP_069110514_1"/>
      <node id="31502" label="WP_116947187_1"/>
      <node id="31500" label="WP_135099815_2"/>
      <node id="31499" label="WP_092614753_1"/>
      <node id="31497" label="WP_094742457_4"/>
      <node id="31493" label="WP_093908736_5"/>
      <node id="31491" label="WP_106331017_5"/>
      <node id="31489" label="WP_157857956_3"/>
      <node id="31488" label="WP_051418997_2"/>
      <node id="31483" label="WP_141234752_1"/>
      <node id="31482" label="WP_166551441_2"/>
      <node id="31480" label="WP_122933410_1"/>
      <node id="31478" label="WP_109741224_4"/>
      <node id="31477" label="WP_028525980_3"/>
      <node id="31475" label="WP_144874993_3"/>
      <node id="31470" label="WP_138498765_2"/>
      <node id="31468" label="RCJ34841_3"/>
      <node id="31466" label="WP_094345265_4"/>
      <node id="31465" label="WP_012409237_5"/>
      <node id="31457" label="WP_042619690_6"/>
      <node id="31454" label="WP_062451377_2"/>
      <node id="31453" label="WP_112963677_3"/>
      <node id="31451" label="WP_111838980_2"/>
      <node id="31450" label="WP_067652746_3"/>
      <node id="31442" label="WP_137248807_2"/>
      <node id="31440" label="WP_062348671_2"/>
      <node id="31438" label="WP_030452416_2"/>
      <node id="31436" label="WP_161483240_2"/>
      <node id="31435" label="WP_062437448_2"/>
      <node id="31431" label="WP_111838980_1"/>
      <node id="31426" label="WP_062451377_1"/>
      <node id="31424" label="WP_067652746_2"/>
      <node id="31422" label="WP_042619690_5"/>
      <node id="31421" label="WP_112963677_2"/>
      <node id="31414" label="WP_012409237_1"/>
      <node id="31408" label="WP_109006830_2"/>
      <node id="31406" label="WP_006619051_2"/>
      <node id="31405" label="WP_006622760_5"/>
      <node id="31403" label="WP_094345265_3"/>
      <node id="31402" label="WP_012409237_4"/>
      <node id="31395" label="TAE58797_2"/>
      <node id="31392" label="WP_095720237_2"/>
      <node id="31389" label="WP_089092704_3"/>
      <node id="31387" label="BAZ29305_3"/>
      <node id="31385" label="WP_096561092_3"/>
      <node id="31384" label="WP_103138934_3"/>
      <node id="31372" label="WP_168465654_9"/>
      <node id="31370" label="WP_096664869_8"/>
      <node id="31368" label="WP_015078657_11"/>
      <node id="31366" label="WP_027402982_9"/>
      <node id="31364" label="WP_168645325_7"/>
      <node id="31363" label="WP_148763415_7"/>
      <node id="31357" label="WP_096664869_6"/>
      <node id="31352" label="WP_148763415_3"/>
      <node id="31348" label="WP_027402982_1"/>
      <node id="31345" label="WP_015078657_5"/>
      <node id="31343" label="WP_168645325_2"/>
      <node id="31342" label="WP_168465654_5"/>
      <node id="31338" label="WP_136238412_2"/>
      <node id="31335" label="WP_109497443_1"/>
      <node id="31333" label="WP_053560627_2"/>
      <node id="31331" label="WP_051851944_2"/>
      <node id="31329" label="WP_128433866_3"/>
      <node id="31328" label="WP_139627778_3"/>
      <node id="31316" label="WP_073643028_2"/>
      <node id="31314" label="WP_138498533_5"/>
      <node id="31312" label="BAZ33272_3"/>
      <node id="31310" label="WP_096537472_1"/>
      <node id="31308" label="WP_099068319_1"/>
      <node id="31307" label="WP_096664869_3"/>
      <node id="31292" label="WP_097216730_2"/>
      <node id="31288" label="WP_078077257_2"/>
      <node id="31286" label="WP_052479947_4"/>
      <node id="31284" label="WP_104779873_1"/>
      <node id="31282" label="WP_121750537_3"/>
      <node id="31280" label="WP_055421432_3"/>
      <node id="31279" label="WP_135072443_2"/>
      <node id="31272" label="WP_168645325_3"/>
      <node id="31266" label="OBQ18754_1"/>
      <node id="31261" label="WP_015078657_3"/>
      <node id="31257" label="WP_168465654_2"/>
      <node id="31254" label="WP_027402982_3"/>
      <node id="31252" label="WP_148763415_1"/>
      <node id="31251" label="WP_096664869_4"/>
      <node id="31249" label="WP_054237388_8"/>
      <node id="31247" label="WP_071383933_7"/>
      <node id="31244" label="WP_153461219_5"/>
      <node id="31242" label="WP_153461219_7"/>
      <node id="31240" label="WP_157846946_3"/>
      <node id="31238" label="WP_051708270_3"/>
      <node id="31237" label="WP_053706403_4"/>
      <node id="31220" label="WP_107498105_3"/>
      <node id="31218" label="WP_055189764_1"/>
      <node id="31216" label="WP_106743417_1"/>
      <node id="31214" label="WP_162197196_2"/>
      <node id="31212" label="WP_106358260_1"/>
      <node id="31210" label="WP_110278359_1"/>
      <node id="31209" label="KQB97104_1"/>
      <node id="31203" label="WP_155862233_6"/>
      <node id="31197" label="WP_092602219_1"/>
      <node id="31189" label="WP_008380405_3"/>
      <node id="31187" label="WP_068028504_3"/>
      <node id="31185" label="WP_115965582_1"/>
      <node id="31183" label="WP_084520237_3"/>
      <node id="31181" label="WP_122818055_3"/>
      <node id="31180" label="WP_153321593_2"/>
      <node id="31168" label="WP_015078657_9"/>
      <node id="31160" label="WP_168465654_6"/>
      <node id="31153" label="WP_096664869_7"/>
      <node id="31147" label="WP_168645325_6"/>
      <node id="31142" label="WP_137906310_4"/>
      <node id="31139" label="WP_168357543_3"/>
      <node id="31138" label="OBQ18754_4"/>
      <node id="31136" label="OBQ36138_2"/>
      <node id="31135" label="WP_148763415_6"/>
      <node id="31122" label="WP_137248807_1"/>
      <node id="31114" label="CNF13542_4"/>
      <node id="31103" label="WP_161483240_1"/>
      <node id="31101" label="WP_145982885_1"/>
      <node id="31099" label="WP_062437448_1"/>
      <node id="31097" label="WP_030452416_1"/>
      <node id="31095" label="WP_062348671_1"/>
      <node id="31093" label="WP_131969051_1"/>
      <node id="31092" label="PZN45587_2"/>
      <node id="31075" label="WP_166841243_3"/>
      <node id="31068" label="WP_131089594_5"/>
      <node id="31065" label="WP_141366901_2"/>
      <node id="31058" label="WP_142936832_3"/>
      <node id="31052" label="WP_096285992_4"/>
      <node id="31046" label="WP_168688294_1"/>
      <node id="31043" label="WP_104291723_5"/>
      <node id="31040" label="WP_061955677_5"/>
      <node id="31038" label="AFR27446_3"/>
      <node id="31036" label="WP_062071413_3"/>
      <node id="31035" label="WP_091465037_3"/>
      <node id="31017" label="WP_097866484_4"/>
      <node id="31011" label="WP_051840194_4"/>
      <node id="31008" label="WP_058047489_3"/>
      <node id="31005" label="WP_141310912_3"/>
      <node id="31004" label="WP_120754718_5"/>
      <node id="31001" label="WP_031017311_4"/>
      <node id="31000" label="WP_126393842_3"/>
      <node id="30998" label="WP_124271963_3"/>
      <node id="30996" label="WP_107115831_4"/>
      <node id="30994" label="WP_018960901_3"/>
      <node id="30992" label="WP_096622718_2"/>
      <node id="30991" label="WP_044377254_2"/>
      <node id="30955" label="PIR21572_1"/>
      <node id="30945" label="WP_052479947_3"/>
      <node id="30942" label="WP_055421432_2"/>
      <node id="30940" label="WP_135072443_1"/>
      <node id="30938" label="WP_078077257_1"/>
      <node id="30936" label="WP_107501676_2"/>
      <node id="30935" label="WP_141754588_2"/>
      <node id="30933" label="WP_121750537_1"/>
      <node id="30931" label="WP_097216730_1"/>
      <node id="30929" label="WP_051727186_2"/>
      <node id="30927" label="WP_104779873_2"/>
      <node id="30926" label="GFH39519_2"/>
      <node id="30918" label="WP_139627778_1"/>
      <node id="30914" label="WP_015659226_5"/>
      <node id="30903" label="WP_042407705_1"/>
      <node id="30902" label="WP_164312175_5"/>
      <node id="30900" label="WP_060892878_6"/>
      <node id="30894" label="WP_083744359_1"/>
      <node id="30888" label="WP_109497443_4"/>
      <node id="30886" label="WP_051851944_1"/>
      <node id="30884" label="WP_136238412_1"/>
      <node id="30882" label="WP_128433866_1"/>
      <node id="30880" label="WP_053560627_1"/>
      <node id="30879" label="WP_133890759_5"/>
      <node id="30859" label="WP_054237388_2"/>
      <node id="30851" label="WP_071383933_4"/>
      <node id="30841" label="WP_052856102_1"/>
      <node id="30835" label="WP_106115031_2"/>
      <node id="30833" label="WP_016570561_3"/>
      <node id="30831" label="WP_164312175_1"/>
      <node id="30829" label="WP_015659226_1"/>
      <node id="30827" label="WP_079181075_3"/>
      <node id="30825" label="WP_133890759_1"/>
      <node id="30823" label="WP_104258544_3"/>
      <node id="30821" label="WP_141720451_4"/>
      <node id="30820" label="WP_060892878_2"/>
      <node id="30812" label="WP_162681093_3"/>
      <node id="30793" label="WP_017569537_3"/>
      <node id="30791" label="WP_129202808_1"/>
      <node id="30783" label="WP_037567380_2"/>
      <node id="30780" label="WP_107397356_2"/>
      <node id="30775" label="WP_088612422_3"/>
      <node id="30771" label="WP_068208510_1"/>
      <node id="30769" label="WP_068252194_1"/>
      <node id="30767" label="WP_027975917_3"/>
      <node id="30765" label="WP_104263878_1"/>
      <node id="30763" label="WP_088679810_2"/>
      <node id="30762" label="WP_096547181_4"/>
      <node id="30754" label="RCJ30949_8"/>
      <node id="30752" label="RCJ30949_7"/>
      <node id="30750" label="RCJ30949_11"/>
      <node id="30744" label="WP_137906310_2"/>
      <node id="30732" label="WP_137906310_3"/>
      <node id="30728" label="WP_096559014_9"/>
      <node id="30726" label="WP_168357543_4"/>
      <node id="30724" label="WP_137906310_6"/>
      <node id="30722" label="WP_168357543_2"/>
      <node id="30720" label="WP_015210601_3"/>
      <node id="30718" label="WP_168357543_6"/>
      <node id="30716" label="WP_015210601_5"/>
      <node id="30714" label="WP_168501874_2"/>
      <node id="30713" label="WP_168501874_1"/>
      <node id="30687" label="CNF13542_1"/>
      <node id="30680" label="WP_062437448_4"/>
      <node id="30679" label="WP_030452416_4"/>
      <node id="30672" label="WP_030452416_3"/>
      <node id="30650" label="WP_137248807_3"/>
      <node id="30648" label="WP_131969051_3"/>
      <node id="30646" label="WP_161483240_3"/>
      <node id="30644" label="WP_062437448_3"/>
      <node id="30642" label="CNF13542_5"/>
      <node id="30641" label="WP_062348671_3"/>
      <node id="30639" label="WP_161483240_4"/>
      <node id="30637" label="WP_137248807_4"/>
      <node id="30635" label="PZN45587_1"/>
      <node id="30633" label="WP_131969051_2"/>
      <node id="30632" label="WP_062348671_4"/>
      <node id="30618" label="WP_039653089_1"/>
      <node id="30580" label="WP_030193573_1"/>
      <node id="30573" label="WP_044449646_1"/>
      <node id="30571" label="WP_106236741_1"/>
      <node id="30562" label="WP_018962004_1"/>
      <node id="30556" label="WP_091117926_2"/>
      <node id="30553" label="WP_131980220_1"/>
      <node id="30551" label="WP_020634200_1"/>
      <node id="30547" label="WP_046417231_1"/>
      <node id="30545" label="BBC15200_1"/>
      <node id="30543" label="WP_159037419_1"/>
      <node id="30541" label="WP_161634174_2"/>
      <node id="30539" label="BAN83919_1"/>
      <node id="30537" label="WP_065960366_1"/>
      <node id="30535" label="WP_129307706_1"/>
      <node id="30534" label="WP_017595611_9003"/>
      <node id="30520" label="WP_103031749_1"/>
      <node id="30489" label="WP_088679810_1"/>
      <node id="30436" label="WP_068208510_2"/>
      <node id="30431" label="WP_104263878_2"/>
      <node id="30421" label="WP_017569537_2"/>
      <node id="30408" label="WP_068252194_2"/>
      <node id="30406" label="EES41370_3"/>
      <node id="30404" label="WP_027975917_4"/>
      <node id="30402" label="WP_102695456_1"/>
      <node id="30400" label="WP_096547181_5"/>
      <node id="30398" label="WP_030061393_1"/>
      <node id="30396" label="WP_037567380_3"/>
      <node id="30394" label="WP_129202808_2"/>
      <node id="30392" label="WP_016898474_1"/>
      <node id="30390" label="WP_162681093_4"/>
      <node id="30388" label="WP_088612422_2"/>
      <node id="30386" label="WP_107397356_1"/>
      <node id="30385" label="WP_105988468_5"/>
      <node id="30370" label="WP_103138325_9"/>
      <node id="30358" label="WP_096679519_5"/>
      <node id="30331" label="AVH79628_6"/>
      <node id="30316" label="WP_104899482_6"/>
      <node id="30263" label="WP_019501037_4"/>
      <node id="30250" label="AVH79456_6"/>
      <node id="30248" label="WP_015216084_11"/>
      <node id="30246" label="AVH79662_6"/>
      <node id="30242" label="AVH79607_6"/>
      <node id="30240" label="BBD66616_5"/>
      <node id="30238" label="WP_012409787_6"/>
      <node id="30231" label="WP_168643398_8"/>
      <node id="30228" label="TVP63782_7"/>
      <node id="30225" label="WP_086760950_10"/>
      <node id="30223" label="WP_012595952_4"/>
      <node id="30221" label="WP_096589596_11"/>
      <node id="30219" label="WP_012597836_8"/>
      <node id="30217" label="WP_167721203_9"/>
      <node id="30215" label="WP_087592205_7"/>
      <node id="30214" label="WP_124970176_5"/>
      <node id="30211" label="WP_015210601_4"/>
      <node id="30204" label="WP_026100063_8"/>
      <node id="30200" label="WP_012409362_10"/>
      <node id="30193" label="WP_010996095_2"/>
      <node id="30191" label="WP_011321056_6"/>
      <node id="30189" label="WP_096681247_9"/>
      <node id="30187" label="WP_103136595_4"/>
      <node id="30185" label="WP_066383651_7"/>
      <node id="30182" label="WP_069073064_3"/>
      <node id="30181" label="BAZ29283_6"/>
      <node id="30177" label="WP_015212417_5"/>
      <node id="30175" label="WP_016950446_5"/>
      <node id="30171" label="WP_009343975_3"/>
      <node id="30169" label="WP_057178590_7"/>
      <node id="30167" label="WP_013190203_3"/>
      <node id="30165" label="WP_096569967_9"/>
      <node id="30164" label="WP_071189061_5"/>
      <node id="30162" label="WP_138499068_7"/>
      <node id="30160" label="WP_114082527_8"/>
      <node id="30159" label="WP_015127932_6"/>
      <node id="30141" label="WP_058047489_2"/>
      <node id="30113" label="WP_157857956_2"/>
      <node id="30067" label="WP_051746348_1"/>
      <node id="30050" label="WP_093908736_2"/>
      <node id="30038" label="WP_073726342_2"/>
      <node id="30017" label="WP_125506282_1"/>
      <node id="30012" label="WP_096622718_4"/>
      <node id="30010" label="WP_031017311_1"/>
      <node id="30003" label="WP_124271963_2"/>
      <node id="30000" label="WP_159688203_2"/>
      <node id="29998" label="WP_158686821_3"/>
      <node id="29997" label="WP_159770677_3"/>
      <node id="29995" label="WP_114054648_2"/>
      <node id="29993" label="WP_018960901_2"/>
      <node id="29991" label="WP_051840194_5"/>
      <node id="29989" label="WP_141310912_2"/>
      <node id="29987" label="WP_126393842_2"/>
      <node id="29985" label="WP_097866484_2"/>
      <node id="29983" label="WP_044377254_1"/>
      <node id="29981" label="WP_107115831_3"/>
      <node id="29980" label="WP_120754718_2"/>
      <node id="29971" label="WP_013190203_2"/>
      <node id="29949" label="WP_011321056_7"/>
      <node id="29933" label="RCJ30949_12"/>
      <node id="29922" label="WP_096569967_7"/>
      <node id="29896" label="WP_026100063_9"/>
      <node id="29881" label="WP_015210601_1"/>
      <node id="29879" label="WP_096536886_2"/>
      <node id="29866" label="WP_099071810_4"/>
      <node id="29862" label="WP_016950446_4"/>
      <node id="29856" label="RCJ14929_5"/>
      <node id="29854" label="WP_138499068_3"/>
      <node id="29850" label="WP_071189061_1"/>
      <node id="29848" label="TAE59458_4"/>
      <node id="29846" label="WP_069073064_2"/>
      <node id="29844" label="WP_073644071_3"/>
      <node id="29842" label="CEJ45116_4"/>
      <node id="29840" label="WP_057178590_6"/>
      <node id="29838" label="TVP62740_5"/>
      <node id="29836" label="WP_015212417_7"/>
      <node id="29834" label="WP_010996095_3"/>
      <node id="29832" label="WP_015127932_5"/>
      <node id="29831" label="WP_096681247_10"/>
      <node id="29742" label="WP_168643398_2"/>
      <node id="29670" label="AVH79456_2"/>
      <node id="29628" label="WP_167721203_1"/>
      <node id="29603" label="WP_103138325_1"/>
      <node id="29548" label="TVP63782_2"/>
      <node id="29515" label="WP_087592205_1"/>
      <node id="29493" label="WP_012595952_2"/>
      <node id="29472" label="AVH79662_1"/>
      <node id="29470" label="WP_087592205_4"/>
      <node id="29468" label="WP_124970176_1"/>
      <node id="29466" label="WP_168643398_1"/>
      <node id="29464" label="WP_096589596_2"/>
      <node id="29462" label="WP_012597836_1"/>
      <node id="29460" label="AVH79628_1"/>
      <node id="29458" label="AVH79456_1"/>
      <node id="29456" label="WP_096679519_1"/>
      <node id="29454" label="AVH79607_1"/>
      <node id="29452" label="WP_015216084_2"/>
      <node id="29450" label="WP_015216084_1"/>
      <node id="29448" label="WP_096589596_1"/>
      <node id="29446" label="WP_012595952_1"/>
      <node id="29444" label="WP_086760950_1"/>
      <node id="29442" label="TVP63782_1"/>
      <node id="29440" label="WP_012409787_8"/>
      <node id="29438" label="WP_087592205_2"/>
      <node id="29436" label="WP_167721203_5"/>
      <node id="29434" label="WP_086760950_2"/>
      <node id="29433" label="WP_012409787_1"/>
      <node id="29417" label="WP_106371152_6"/>
      <node id="29351" label="CNF13542_3"/>
      <node id="29350" label="TCN71580_2"/>
      <node id="29336" label="WP_073591536_5"/>
      <node id="29319" label="WP_073643028_1"/>
      <node id="29311" label="WP_087592205_3"/>
      <node id="29306" label="RCJ40334_2"/>
      <node id="29297" label="WP_138498533_1"/>
      <node id="29281" label="WP_103138325_7"/>
      <node id="29271" label="BAZ33272_2"/>
      <node id="29267" label="WP_086760950_5"/>
      <node id="29260" label="WP_073643028_4"/>
      <node id="29258" label="WP_073591536_3"/>
      <node id="29253" label="WP_106371152_2"/>
      <node id="29251" label="WP_104899482_1"/>
      <node id="29249" label="WP_168643398_3"/>
      <node id="29247" label="WP_015216084_3"/>
      <node id="29245" label="WP_096589596_5"/>
      <node id="29243" label="WP_012595952_3"/>
      <node id="29241" label="TVP63782_3"/>
      <node id="29240" label="WP_104899482_3"/>
      <node id="29238" label="WP_012409787_2"/>
      <node id="29236" label="AVH79662_4"/>
      <node id="29234" label="WP_167721203_4"/>
      <node id="29232" label="RCJ40334_1"/>
      <node id="29231" label="WP_096679519_3"/>
      <node id="29229" label="WP_124970176_8"/>
      <node id="29228" label="WP_087592205_5"/>
      <node id="29139" label="WP_073631441_1"/>
      <node id="29015" label="WP_066380047_1"/>
      <node id="28979" label="WP_016874828_1"/>
      <node id="28943" label="WP_096659345_1"/>
      <node id="28766" label="BAZ29305_1"/>
      <node id="28671" label="BAZ41701_1"/>
      <node id="28637" label="TAE58797_1"/>
      <node id="28550" label="WP_027840959_1"/>
      <node id="28472" label="WP_071187741_1"/>
      <node id="28470" label="RCJ31639_2"/>
      <node id="28468" label="WP_103138934_1"/>
      <node id="28466" label="WP_096680266_1"/>
      <node id="28464" label="BAZ15600_2"/>
      <node id="28462" label="TVP62142_1"/>
      <node id="28460" label="TWH40986_1"/>
      <node id="28458" label="WP_006196066_1"/>
      <node id="28456" label="WP_039742608_1"/>
      <node id="28454" label="WP_162399305_2"/>
      <node id="28452" label="WP_169219905_1"/>
      <node id="28450" label="WP_010996620_1"/>
      <node id="28448" label="WP_017315790_1"/>
      <node id="28446" label="WP_089092704_1"/>
      <node id="28444" label="WP_015116255_2"/>
      <node id="28442" label="RCJ34841_1"/>
      <node id="28440" label="WP_013190653_1"/>
      <node id="28438" label="WP_026093360_1"/>
      <node id="28436" label="WP_029637656_3"/>
      <node id="28434" label="WP_016950293_1"/>
      <node id="28432" label="WP_017320198_1"/>
      <node id="28430" label="WP_168491601_1"/>
      <node id="28428" label="BAZ80283_1"/>
      <node id="28426" label="WP_127056592_1"/>
      <node id="28424" label="WP_045869173_2"/>
      <node id="28422" label="WP_096583741_1"/>
      <node id="28420" label="WP_095720237_1"/>
      <node id="28418" label="WP_062294404_2"/>
      <node id="28416" label="WP_073619367_1"/>
      <node id="28414" label="WP_096561092_1"/>
      <node id="28412" label="WP_026732589_1"/>
      <node id="28410" label="WP_015216396_1"/>
      <node id="28409" label="WP_096559440_1"/>
      <node id="27421" label="WP_015194417_3"/>
      <node id="27414" label="WP_106237513_1"/>
      <node id="27181" label="WP_144873874_1"/>
      <node id="27164" label="WP_038089561_5"/>
      <node id="27127" label="AFY52807_2"/>
      <node id="26425" label="WP_168643398_9"/>
      <node id="26356" label="WP_086820173_1"/>
      <node id="25077" label="WP_088242795_3"/>
      <node id="24978" label="WP_161481447_7"/>
      <node id="24919" label="WP_103138325_5"/>
      <node id="23580" label="WP_017617392_1"/>
      <node id="23438" label="WP_089505437_1"/>
      <node id="23426" label="WP_070396421_4"/>
      <node id="23351" label="WP_010996095_4"/>
      <node id="23322" label="WP_016950446_6"/>
      <node id="23167" label="WP_006195640_10"/>
      <node id="22690" label="WP_167407701_3"/>
      <node id="22276" label="AFY52807_1"/>
      <node id="21460" label="TWH40986_3"/>
      <node id="19913" label="WP_052269673_5"/>
      <node id="18846" label="WP_035150190_5"/>
      <node id="18839" label="WP_016864763_4"/>
      <node id="18671" label="WP_027402982_6"/>
      <node id="18399" label="WP_015155263_2"/>
      <node id="18397" label="WP_162944541_1"/>
      <node id="18251" label="WP_003963573_2"/>
      <node id="17901" label="WP_015207763_4"/>
      <node id="17873" label="WP_166282462_2"/>
      <node id="17868" label="WP_096537472_4"/>
      <node id="17862" label="WP_086820178_3"/>
      <node id="17529" label="WP_084520237_1"/>
      <node id="17306" label="WP_015113151_2"/>
      <node id="17291" label="WP_068099584_2"/>
      <node id="16529" label="WP_071383933_3"/>
      <node id="15549" label="WP_020390834_1"/>
      <node id="15548" label="WP_020390834_2"/>
      <node id="15546" label="OLE73832_2"/>
      <node id="15495" label="WP_079189213_1"/>
      <node id="15470" label="WP_121024930_1"/>
      <node id="15465" label="WP_040022866_2"/>
      <node id="15315" label="RCJ19623_3"/>
      <node id="15226" label="WP_124155194_1"/>
      <node id="14969" label="WP_057178590_3"/>
      <node id="14965" label="WP_161481447_4"/>
      <node id="14958" label="WP_114054648_1"/>
      <node id="14864" label="WP_129307298_1"/>
      <node id="14722" label="WP_130475988_1"/>
      <node id="14162" label="RCJ40850_3"/>
      <node id="14036" label="WP_051438280_1"/>
      <node id="13845" label="WP_106300787_4"/>
      <node id="13811" label="WP_087539234_8"/>
      <node id="13393" label="WP_051436687_2"/>
      <node id="13181" label="WP_094742457_2"/>
      <node id="13167" label="WP_083744359_3"/>
      <node id="13094" label="WP_049802506_1"/>
      <node id="12884" label="WP_029630331_1"/>
      <node id="12352" label="WP_096285992_3"/>
      <node id="12173" label="WP_017581465_3"/>
      <node id="12164" label="WP_017581465_4"/>
      <node id="12027" label="WP_141720451_2"/>
      <node id="12012" label="WP_029630331_3"/>
      <node id="12005" label="WP_096689510_3"/>
      <node id="12003" label="WP_017749323_3"/>
      <node id="12000" label="WP_016950446_2"/>
      <node id="11994" label="WP_096688632_3"/>
      <node id="11711" label="WP_096590413_2"/>
      <node id="11634" label="WP_086689015_3"/>
      <node id="11582" label="WP_168643398_6"/>
      <node id="11426" label="WP_015157989_1"/>
      <node id="11424" label="WP_096575011_1"/>
      <node id="11423" label="WP_062295185_2"/>
      <node id="11220" label="ALC22075_2"/>
      <node id="11117" label="WP_019501037_2"/>
      <node id="11115" label="WP_163927072_3"/>
      <node id="10813" label="WP_148763415_2"/>
      <node id="10792" label="WP_030169499_3"/>
      <node id="10421" label="WP_096536886_6"/>
      <node id="10362" label="AVH79535_3"/>
      <node id="10354" label="AVH79535_5"/>
      <node id="10291" label="ANI93503_2"/>
      <node id="10258" label="WP_105222244_1"/>
      <node id="10216" label="WP_017581465_2"/>
      <node id="9756" label="WP_008380405_2"/>
      <node id="9747" label="WP_068099584_3"/>
      <node id="9434" label="WP_019501955_3"/>
      <node id="9382" label="WP_055533290_1"/>
      <node id="9352" label="WP_017749323_1"/>
      <node id="9284" label="WP_089126833_1"/>
      <node id="8811" label="WP_018550639_1"/>
      <node id="8806" label="WP_019496925_2"/>
      <node id="8794" label="WP_019499235_4"/>
      <node id="8577" label="WP_096589596_3"/>
      <node id="8571" label="WP_087592205_9"/>
      <node id="8552" label="WP_138498533_2"/>
      <node id="8319" label="AVH79662_3"/>
      <node id="8082" label="WP_015212417_4"/>
      <node id="8074" label="WP_096569967_2"/>
      <node id="8041" label="WP_096569967_1"/>
      <node id="8005" label="RCJ14929_4"/>
      <node id="7983" label="WP_099071810_3"/>
      <node id="7957" label="WP_109497443_3"/>
      <node id="7681" label="WP_096730381_4"/>
      <node id="7675" label="WP_017585895_1"/>
      <node id="7663" label="WP_093831028_1"/>
      <node id="7651" label="WP_015155263_4"/>
      <node id="7630" label="WP_015197629_2"/>
      <node id="7614" label="WP_051817283_2"/>
      <node id="7471" label="WP_161481447_6"/>
      <node id="7467" label="WP_161481447_3"/>
      <node id="7465" label="WP_161481447_5"/>
      <node id="7464" label="WP_161481447_1"/>
      <node id="7454" label="WP_053560627_3"/>
      <node id="7449" label="WP_133890759_4"/>
      <node id="7445" label="AVH79535_7"/>
      <node id="7341" label="WP_062071413_2"/>
      <node id="7337" label="WP_104899482_7"/>
      <node id="7309" label="BBD66616_1"/>
      <node id="7297" label="WP_166282462_1"/>
      <node id="7220" label="WP_029630331_2"/>
      <node id="7215" label="WP_022929317_2"/>
      <node id="7213" label="WP_096622718_1"/>
      <node id="7205" label="WP_107115831_1"/>
      <node id="7201" label="WP_124271963_1"/>
      <node id="7101" label="WP_019499235_5"/>
      <node id="7085" label="WP_068385845_1"/>
      <node id="7082" label="WP_057178590_4"/>
      <node id="7076" label="WP_019499235_1"/>
      <node id="7058" label="WP_026100063_5"/>
      <node id="7035" label="BAZ42602_2"/>
      <node id="7031" label="WP_096559014_3"/>
      <node id="7025" label="WP_127086205_2"/>
      <node id="7013" label="WP_044206131_1"/>
      <node id="7004" label="WP_141720451_1"/>
      <node id="6993" label="WP_096590410_2"/>
      <node id="6975" label="WP_015198131_3"/>
      <node id="6846" label="WP_015659226_2"/>
      <node id="6801" label="AVH79662_2"/>
      <node id="6788" label="AVH79628_4"/>
      <node id="6692" label="WP_095933898_2"/>
      <node id="6690" label="WP_051715083_4"/>
      <node id="6670" label="WP_010996095_1"/>
      <node id="6642" label="WP_087539234_5"/>
      <node id="6544" label="WP_012409787_5"/>
      <node id="6484" label="RCJ14929_2"/>
      <node id="6441" label="WP_015207767_6"/>
      <node id="6434" label="WP_167721203_6"/>
      <node id="6423" label="WP_086760950_7"/>
      <node id="6411" label="WP_096589596_7"/>
      <node id="6407" label="WP_073644071_6"/>
      <node id="6397" label="WP_096679519_2"/>
      <node id="6384" label="AVH79628_5"/>
      <node id="6364" label="WP_099068319_3"/>
      <node id="6232" label="WP_052269673_4"/>
      <node id="6230" label="WP_129307298_3"/>
      <node id="6157" label="WP_138499068_2"/>
      <node id="6148" label="WP_026100063_1"/>
      <node id="5975" label="WP_012868258_2"/>
      <node id="5973" label="WP_068028504_2"/>
      <node id="5971" label="WP_115965582_3"/>
      <node id="5969" label="WP_012868258_1"/>
      <node id="5965" label="WP_115965582_2"/>
      <node id="5950" label="WP_169264746_1"/>
      <node id="5948" label="WP_169264744_1"/>
      <node id="5945" label="WP_089126836_1"/>
      <node id="5830" label="WP_017318973_1"/>
      <node id="5806" label="WP_103136595_1"/>
      <node id="5784" label="WP_013321440_1"/>
      <node id="5663" label="CEJ45116_3"/>
      <node id="5660" label="WP_011321056_4"/>
      <node id="5644" label="WP_011321056_3"/>
      <node id="5528" label="WP_114082527_6"/>
      <node id="5413" label="WP_087811088_2"/>
      <node id="5410" label="WP_103811802_2"/>
      <node id="5407" label="WP_129307298_2"/>
      <node id="5406" label="TCN71580_1"/>
      <node id="5399" label="WP_104387267_4"/>
      <node id="5328" label="WP_062295185_7"/>
      <node id="5325" label="WP_096575011_5"/>
      <node id="5216" label="TVP63782_4"/>
      <node id="5195" label="WP_052269673_6"/>
      <node id="5194" label="WP_129307298_4"/>
      <node id="5095" label="RCJ14929_6"/>
      <node id="5080" label="WP_035150190_2"/>
      <node id="4788" label="WP_167725682_3"/>
      <node id="4786" label="WP_096730381_3"/>
      <node id="4785" label="BAY08128_3"/>
      <node id="4770" label="WP_089091039_7"/>
      <node id="4755" label="WP_015212417_6"/>
      <node id="4681" label="WP_084890433_2"/>
      <node id="4677" label="WP_084890433_4"/>
      <node id="4554" label="WP_087542717_1"/>
      <node id="4500" label="WP_109497443_2"/>
      <node id="4362" label="WP_162399505_2"/>
      <node id="4275" label="WP_051857755_1"/>
      <node id="4269" label="WP_044386376_2"/>
      <node id="4267" label="WP_164496180_1"/>
      <node id="4265" label="ROV70439_1"/>
      <node id="4262" label="QKI29067_1"/>
      <node id="4259" label="WP_017585895_2"/>
      <node id="4257" label="WP_017585895_3"/>
      <node id="4254" label="WP_164390060_1"/>
      <node id="4253" label="SAP16385_2"/>
      <node id="4198" label="WP_099700413_3"/>
      <node id="4155" label="WP_151696789_1"/>
      <node id="4124" label="WP_017748579_2"/>
      <node id="4121" label="WP_096580419_2"/>
      <node id="4109" label="AVH79535_4"/>
      <node id="4097" label="WP_102939117_1"/>
      <node id="4094" label="WP_019499235_3"/>
      <node id="3942" label="WP_016864763_1"/>
      <node id="3914" label="WP_086769105_1"/>
      <node id="3898" label="WP_167725682_1"/>
      <node id="3861" label="WP_157857956_1"/>
      <node id="3859" label="WP_031017311_2"/>
      <node id="3856" label="WP_072713661_1"/>
      <node id="3854" label="WP_072808981_1"/>
      <node id="3773" label="WP_086760950_3"/>
      <node id="3759" label="WP_060892878_3"/>
      <node id="3755" label="WP_122818055_9006"/>
      <node id="3752" label="WP_008380405_4"/>
      <node id="3748" label="AOX46105_3"/>
      <node id="3666" label="BAZ42602_3"/>
      <node id="3655" label="WP_096589596_8"/>
      <node id="3653" label="WP_104899482_4"/>
      <node id="3648" label="WP_127086205_1"/>
      <node id="3640" label="WP_086760950_9"/>
      <node id="3634" label="WP_106240815_4"/>
      <node id="3616" label="WP_127086205_6"/>
      <node id="3611" label="WP_086689015_1"/>
      <node id="3520" label="WP_167717694_4"/>
      <node id="3513" label="WP_045870710_1"/>
      <node id="3449" label="WP_017749323_2"/>
      <node id="3446" label="WP_019501955_9"/>
      <node id="3442" label="WP_017318973_2"/>
      <node id="3433" label="WP_096285992_2"/>
      <node id="3430" label="WP_168688294_2"/>
      <node id="3426" label="WP_142936832_2"/>
      <node id="3422" label="WP_061955677_4"/>
      <node id="3415" label="AFR27446_1"/>
      <node id="3414" label="WP_104291723_4"/>
      <node id="3410" label="WP_073639381_2"/>
      <node id="3396" label="WP_062295185_5"/>
      <node id="3391" label="WP_096536886_3"/>
      <node id="3378" label="WP_009343975_6"/>
      <node id="3368" label="WP_012409362_3"/>
      <node id="3352" label="TVP62740_3"/>
      <node id="3334" label="WP_114082527_4"/>
      <node id="3325" label="BAZ30575_1"/>
      <node id="3322" label="WP_096575011_7"/>
      <node id="3304" label="WP_087539234_9"/>
      <node id="3290" label="WP_006195640_6"/>
      <node id="3204" label="WP_167717694_2"/>
      <node id="3199" label="WP_169242999_3"/>
      <node id="3197" label="WP_052269673_3"/>
      <node id="3191" label="WP_051707308_1"/>
      <node id="3185" label="WP_051859750_2"/>
      <node id="3183" label="ANI93503_5"/>
      <node id="3182" label="WP_079151368_1"/>
      <node id="3100" label="WP_114082527_3"/>
      <node id="3094" label="WP_078760724_2"/>
      <node id="3070" label="WP_096689510_1"/>
      <node id="3038" label="WP_096728455_1"/>
      <node id="3006" label="WP_163699711_2"/>
      <node id="2946" label="WP_127931424_1"/>
      <node id="2936" label="WP_153461219_2"/>
      <node id="2934" label="WP_138689268_2"/>
      <node id="2931" label="WP_091097544_1"/>
      <node id="2929" label="WP_138666048_1"/>
      <node id="2926" label="WP_104258544_1"/>
      <node id="2777" label="WP_015155263_1"/>
      <node id="2759" label="WP_069887141_1"/>
      <node id="2757" label="WP_109003510_2"/>
      <node id="2755" label="WP_051707308_3"/>
      <node id="2753" label="WP_086820173_3"/>
      <node id="2750" label="WP_143043955_3"/>
      <node id="2748" label="WP_086820178_1"/>
      <node id="2747" label="WP_149853923_1"/>
      <node id="2745" label="WP_137451632_2"/>
      <node id="2732" label="WP_137451632_3"/>
      <node id="2719" label="WP_137451632_4"/>
      <node id="2714" label="WP_109595189_4"/>
      <node id="2684" label="BAZ29283_5"/>
      <node id="2676" label="WP_015207763_5"/>
      <node id="2670" label="WP_096681247_4"/>
      <node id="2667" label="WP_096681247_8"/>
      <node id="2662" label="WP_015207763_3"/>
      <node id="2656" label="BAZ29283_2"/>
      <node id="2653" label="WP_015207767_3"/>
      <node id="2648" label="WP_015207763_6"/>
      <node id="2640" label="WP_096620064_2"/>
      <node id="2635" label="BAY08128_4"/>
      <node id="2560" label="WP_096681247_3"/>
      <node id="2546" label="WP_138499068_6"/>
      <node id="2540" label="WP_019505167_4"/>
      <node id="2538" label="WP_096679519_4"/>
      <node id="2536" label="WP_151696789_3"/>
      <node id="2532" label="WP_016864763_2"/>
      <node id="2500" label="WP_015127932_3"/>
      <node id="2493" label="WP_069073064_8"/>
      <node id="2480" label="RCJ30949_3"/>
      <node id="2451" label="RCJ30949_1"/>
      <node id="2448" label="WP_006195640_1"/>
      <node id="2437" label="WP_103138325_4"/>
      <node id="2435" label="WP_091465037_1"/>
      <node id="2433" label="WP_104291723_2"/>
      <node id="2430" label="WP_131089594_2"/>
      <node id="2428" label="WP_061955677_2"/>
      <node id="2425" label="WP_061955677_1"/>
      <node id="2418" label="WP_166841243_2"/>
      <node id="2416" label="WP_096285992_1"/>
      <node id="2415" label="WP_131089594_1"/>
      <node id="2410" label="AVH79456_7"/>
      <node id="2405" label="WP_015216084_12"/>
      <node id="2322" label="WP_152591271_1"/>
      <node id="2275" label="WP_008178764_1"/>
      <node id="2269" label="WP_155746097_2"/>
      <node id="2246" label="WP_167717694_3"/>
      <node id="2239" label="WP_096689510_4"/>
      <node id="2237" label="WP_035150190_1"/>
      <node id="2227" label="BAZ33272_4"/>
      <node id="2223" label="WP_015189896_2"/>
      <node id="2213" label="WP_015189896_1"/>
      <node id="2210" label="WP_015193424_4"/>
      <node id="2207" label="WP_068385845_5"/>
      <node id="2205" label="WP_087542717_4"/>
      <node id="2191" label="WP_015193424_3"/>
      <node id="2188" label="WP_105222244_2"/>
      <node id="2186" label="WP_015193424_5"/>
      <node id="2182" label="WP_096576751_1"/>
      <node id="2178" label="WP_096576757_1"/>
      <node id="2155" label="WP_026100063_7"/>
      <node id="2140" label="WP_011321056_8"/>
      <node id="2134" label="WP_066383651_1"/>
      <node id="2129" label="WP_163699711_3"/>
      <node id="2104" label="AVH79628_2"/>
      <node id="2099" label="WP_138498533_6"/>
      <node id="2096" label="WP_015216084_8"/>
      <node id="2084" label="WP_019501955_4"/>
      <node id="2044" label="WP_015113151_3"/>
      <node id="2036" label="WP_096579222_1"/>
      <node id="2034" label="WP_015207767_5"/>
      <node id="2015" label="WP_019501955_6"/>
      <node id="2011" label="WP_019499235_2"/>
      <node id="1998" label="WP_159425899_3"/>
      <node id="1988" label="WP_017198207_5"/>
      <node id="1971" label="WP_012409787_4"/>
      <node id="1967" label="WP_155746097_1"/>
      <node id="1963" label="WP_162398402_1"/>
      <node id="1953" label="WP_167721203_8"/>
      <node id="1951" label="RCJ40334_3"/>
      <node id="1850" label="WP_127086205_5"/>
      <node id="1849" label="WP_062295185_3"/>
      <node id="1847" label="WP_143043955_1"/>
      <node id="1845" label="WP_106331017_2"/>
      <node id="1843" label="WP_051840194_1"/>
      <node id="1841" label="WP_120754718_1"/>
      <node id="1839" label="WP_126393842_1"/>
      <node id="1837" label="WP_159770677_1"/>
      <node id="1835" label="WP_093908736_1"/>
      <node id="1833" label="WP_097866484_1"/>
      <node id="1831" label="WP_051418997_1"/>
      <node id="1828" label="WP_058047489_1"/>
      <node id="1826" label="WP_141310912_1"/>
      <node id="1824" label="WP_009079852_1"/>
      <node id="1821" label="WP_018960901_1"/>
      <node id="1820" label="WP_051840194_2"/>
      <node id="1815" label="TAE59458_6"/>
      <node id="1812" label="WP_015127932_7"/>
      <node id="1800" label="WP_114082527_5"/>
      <node id="1791" label="WP_096681247_6"/>
      <node id="1767" label="WP_012409362_7"/>
      <node id="1762" label="WP_015127932_2"/>
      <node id="1756" label="WP_011321056_2"/>
      <node id="1753" label="WP_114082527_2"/>
      <node id="1750" label="WP_012409362_2"/>
      <node id="1736" label="WP_015127932_1"/>
      <node id="1693" label="WP_026100063_4"/>
      <node id="1682" label="WP_012409362_4"/>
      <node id="1678" label="WP_015078657_2"/>
      <node id="1642" label="WP_062346719_3"/>
      <node id="1638" label="WP_017581465_1"/>
      <node id="1627" label="WP_073591536_4"/>
      <node id="1620" label="WP_068385845_6"/>
      <node id="1612" label="WP_062346719_2"/>
      <node id="1610" label="WP_066371470_5"/>
      <node id="1606" label="WP_155349848_1"/>
      <node id="1599" label="WP_066371470_3"/>
      <node id="1596" label="WP_062339008_3"/>
      <node id="1594" label="WP_062339008_1"/>
      <node id="1591" label="WP_066371470_4"/>
      <node id="1588" label="WP_138499827_2"/>
      <node id="1586" label="WP_087592205_11"/>
      <node id="1580" label="WP_035150190_3"/>
      <node id="1576" label="WP_106289349_3"/>
      <node id="1561" label="WP_124970176_9"/>
      <node id="1558" label="WP_019496925_1"/>
      <node id="1554" label="WP_138499827_3"/>
      <node id="1552" label="WP_106371152_5"/>
      <node id="1550" label="WP_096688632_5"/>
      <node id="1541" label="WP_138498533_3"/>
      <node id="1529" label="WP_163927072_2"/>
      <node id="1524" label="WP_099700413_1"/>
      <node id="1522" label="WP_096688632_7"/>
      <node id="1520" label="RCJ19623_2"/>
      <node id="1516" label="WP_171977306_1"/>
      <node id="1512" label="AVH79535_1"/>
      <node id="1509" label="TAG67909_1"/>
      <node id="1506" label="TVP62740_4"/>
      <node id="1501" label="CEJ45116_6"/>
      <node id="1494" label="WP_012409362_9"/>
      <node id="1491" label="RCJ30949_9"/>
      <node id="1489" label="WP_138499068_8"/>
      <node id="1487" label="WP_096559014_7"/>
      <node id="1485" label="WP_015113151_6"/>
      <node id="1474" label="WP_012409362_5"/>
      <node id="1464" label="WP_012409362_8"/>
      <node id="1449" label="WP_026100063_3"/>
      <node id="1438" label="WP_012409362_6"/>
      <node id="1395" label="WP_089091039_5"/>
      <node id="1388" label="TAE59458_2"/>
      <node id="1385" label="WP_086769105_2"/>
      <node id="1371" label="WP_054237388_4"/>
      <node id="1369" label="WP_073726342_1"/>
      <node id="1366" label="WP_059262025_2"/>
      <node id="1364" label="WP_164312175_2"/>
      <node id="1362" label="WP_086829041_1"/>
      <node id="1358" label="WP_155358788_3"/>
      <node id="1351" label="AVH79607_5"/>
      <node id="1344" label="WP_044206131_2"/>
      <node id="1331" label="WP_019501955_12"/>
      <node id="1327" label="WP_019496925_3"/>
      <node id="1313" label="AVH79535_8"/>
      <node id="1306" label="BAZ42602_5"/>
      <node id="1304" label="WP_106300787_3"/>
      <node id="1295" label="WP_171977306_3"/>
      <node id="1292" label="TVP63782_5"/>
      <node id="1290" label="WP_086760950_12"/>
      <node id="1232" label="WP_096664869_2"/>
      <node id="1192" label="WP_073644071_1"/>
      <node id="1190" label="AFR27446_2"/>
      <node id="1187" label="WP_062071413_1"/>
      <node id="1185" label="AOX46105_2"/>
      <node id="1183" label="AGP61345_5"/>
      <node id="1180" label="WP_133616643_3"/>
      <node id="1177" label="WP_091465037_2"/>
      <node id="1175" label="WP_166841243_1"/>
      <node id="1173" label="SLE69095_3"/>
      <node id="1171" label="SLE69095_1"/>
      <node id="1169" label="WP_142936832_1"/>
      <node id="1168" label="WP_104296401_5"/>
      <node id="1166" label="WP_167725682_4"/>
      <node id="1154" label="WP_017314970_4"/>
      <node id="1150" label="RCJ40334_5"/>
      <node id="1144" label="WP_017314970_3"/>
      <node id="1141" label="WP_027402982_2"/>
      <node id="1136" label="WP_015127932_4"/>
      <node id="1130" label="WP_168357543_1"/>
      <node id="1125" label="BAY08128_1"/>
      <node id="1120" label="WP_086689015_2"/>
      <node id="1112" label="WP_015216084_4"/>
      <node id="1107" label="BAY08128_2"/>
      <node id="1096" label="WP_153461219_3"/>
      <node id="1093" label="WP_030169499_4"/>
      <node id="1090" label="WP_083744359_2"/>
      <node id="1087" label="AGP61345_4"/>
      <node id="1085" label="WP_164312175_3"/>
      <node id="1083" label="WP_071383933_2"/>
      <node id="1081" label="WP_141936425_2"/>
      <node id="1077" label="WP_068210304_1"/>
      <node id="1075" label="WP_051851944_3"/>
      <node id="1073" label="WP_054237388_3"/>
      <node id="1071" label="WP_141936425_3"/>
      <node id="1069" label="WP_155862233_4"/>
      <node id="1067" label="WP_068210304_3"/>
      <node id="1064" label="WP_017198207_3"/>
      <node id="1061" label="WP_139627778_2"/>
      <node id="1058" label="WP_153461219_4"/>
      <node id="1057" label="WP_128433866_2"/>
      <node id="1055" label="WP_051840628_1"/>
      <node id="1053" label="WP_125821548_1"/>
      <node id="1049" label="ANI93503_6"/>
      <node id="1047" label="ANI93503_1"/>
      <node id="1044" label="ANI93503_3"/>
      <node id="1034" label="WP_169219633_2"/>
      <node id="1031" label="AFY52807_4"/>
      <node id="1030" label="AFY52807_3"/>
      <node id="1022" label="WP_044449859_3"/>
      <node id="1008" label="WP_138499068_5"/>
      <node id="1000" label="WP_138499068_1"/>
      <node id="971" label="WP_138499068_4"/>
      <node id="956" label="BBD63560_1"/>
      <node id="954" label="WP_099068319_7"/>
      <node id="952" label="WP_087542717_5"/>
      <node id="947" label="WP_015210601_2"/>
      <node id="942" label="WP_071107270_2"/>
      <node id="939" label="OBQ01900_2"/>
      <node id="935" label="WP_017748579_1"/>
      <node id="932" label="WP_027843178_1"/>
      <node id="930" label="WP_053455886_2"/>
      <node id="928" label="WP_015197629_1"/>
      <node id="926" label="WP_073643028_3"/>
      <node id="921" label="WP_106240815_1"/>
      <node id="918" label="WP_105222244_3"/>
      <node id="916" label="WP_163670238_2"/>
      <node id="914" label="WP_012597836_7"/>
      <node id="912" label="WP_012597836_6"/>
      <node id="910" label="WP_124970176_11"/>
      <node id="908" label="WP_027845719_3"/>
      <node id="906" label="WP_012597836_3"/>
      <node id="903" label="WP_169219633_1"/>
      <node id="901" label="WP_068385845_4"/>
      <node id="899" label="WP_015189896_3"/>
      <node id="896" label="BBD63560_3"/>
      <node id="893" label="WP_011610106_1"/>
      <node id="891" label="WP_088242795_2"/>
      <node id="886" label="WP_068385845_2"/>
      <node id="883" label="BBD63560_4"/>
      <node id="881" label="WP_053455886_1"/>
      <node id="879" label="AVH79535_2"/>
      <node id="877" label="RCJ40850_2"/>
      <node id="875" label="WP_169219633_3"/>
      <node id="873" label="RCJ40850_1"/>
      <node id="870" label="WP_015197629_3"/>
      <node id="868" label="WP_096688632_2"/>
      <node id="866" label="WP_099068319_2"/>
      <node id="864" label="WP_006513161_2"/>
      <node id="862" label="WP_053455886_3"/>
      <node id="858" label="WP_035150190_4"/>
      <node id="855" label="WP_096580419_3"/>
      <node id="852" label="BBD63560_2"/>
      <node id="850" label="WP_027845719_2"/>
      <node id="849" label="WP_071107270_1"/>
      <node id="846" label="WP_060892878_4"/>
      <node id="838" label="WP_068150862_2"/>
      <node id="833" label="WP_159688203_1"/>
      <node id="830" label="WP_078760724_1"/>
      <node id="827" label="WP_015659226_4"/>
      <node id="825" label="WP_139979956_2"/>
      <node id="819" label="WP_091097544_2"/>
      <node id="817" label="WP_170198719_2"/>
      <node id="814" label="PZN41733_3"/>
      <node id="811" label="WP_068150862_3"/>
      <node id="809" label="WP_164394909_1"/>
      <node id="806" label="WP_052808529_1"/>
      <node id="804" label="WP_096688632_1"/>
      <node id="802" label="WP_127078868_1"/>
      <node id="795" label="WP_027843178_2"/>
      <node id="790" label="WP_106300787_1"/>
      <node id="778" label="AVH79456_3"/>
      <node id="775" label="WP_017318973_3"/>
      <node id="772" label="BAZ42602_1"/>
      <node id="767" label="WP_027845719_1"/>
      <node id="765" label="WP_099068319_4"/>
      <node id="764" label="WP_019495762_1"/>
      <node id="762" label="AVH79456_4"/>
      <node id="760" label="RCJ19623_5"/>
      <node id="758" label="WP_019501037_1"/>
      <node id="756" label="WP_104899482_2"/>
      <node id="754" label="WP_167721203_2"/>
      <node id="751" label="RCJ19623_1"/>
      <node id="747" label="WP_086760950_4"/>
      <node id="744" label="WP_015216084_7"/>
      <node id="742" label="AVH79628_3"/>
      <node id="740" label="WP_167721203_3"/>
      <node id="737" label="WP_096589596_4"/>
      <node id="735" label="WP_087539234_2"/>
      <node id="731" label="WP_096620064_1"/>
      <node id="727" label="WP_096537472_2"/>
      <node id="725" label="WP_073644071_2"/>
      <node id="723" label="WP_073644071_8"/>
      <node id="719" label="WP_087539234_6"/>
      <node id="711" label="WP_062295185_4"/>
      <node id="707" label="WP_006195640_8"/>
      <node id="705" label="WP_069073064_7"/>
      <node id="702" label="WP_006195640_5"/>
      <node id="699" label="WP_087539234_3"/>
      <node id="697" label="WP_006195640_9"/>
      <node id="693" label="WP_066383651_6"/>
      <node id="691" label="WP_073644071_4"/>
      <node id="686" label="RCJ14929_1"/>
      <node id="684" label="WP_038089561_1"/>
      <node id="681" label="WP_096559014_6"/>
      <node id="678" label="WP_104387267_1"/>
      <node id="676" label="WP_137906310_1"/>
      <node id="673" label="WP_099068319_6"/>
      <node id="671" label="RCJ30949_6"/>
      <node id="667" label="WP_096536886_4"/>
      <node id="663" label="WP_062295185_6"/>
      <node id="658" label="WP_089091039_4"/>
      <node id="653" label="WP_096537472_5"/>
      <node id="649" label="WP_016950446_3"/>
      <node id="641" label="TAE59458_1"/>
      <node id="639" label="WP_066383651_3"/>
      <node id="637" label="WP_015212417_3"/>
      <node id="630" label="WP_096575011_4"/>
      <node id="628" label="WP_057178590_1"/>
      <node id="626" label="WP_015113151_4"/>
      <node id="623" label="WP_015139846_1"/>
      <node id="621" label="WP_103136595_3"/>
      <node id="619" label="WP_038089561_2"/>
      <node id="617" label="WP_009343975_2"/>
      <node id="609" label="WP_069073064_4"/>
      <node id="607" label="TVP62740_2"/>
      <node id="605" label="WP_103136595_2"/>
      <node id="602" label="WP_089091039_1"/>
      <node id="599" label="WP_051708270_2"/>
      <node id="597" label="WP_159425899_2"/>
      <node id="594" label="WP_016570561_1"/>
      <node id="592" label="PZN41733_2"/>
      <node id="590" label="WP_051700182_1"/>
      <node id="582" label="WP_130878496_2"/>
      <node id="576" label="WP_051837683_3"/>
      <node id="573" label="WP_016570561_2"/>
      <node id="571" label="SNT25203_4"/>
      <node id="569" label="WP_052680420_1"/>
      <node id="567" label="AWS47415_2"/>
      <node id="564" label="SNT25203_1"/>
      <node id="560" label="WP_158686821_1"/>
      <node id="552" label="WP_079181075_2"/>
      <node id="545" label="WP_093619522_3"/>
      <node id="543" label="WP_130878496_5"/>
      <node id="541" label="ALC22075_1"/>
      <node id="537" label="WP_017198207_2"/>
      <node id="535" label="ANS68054_1"/>
      <node id="533" label="WP_106115031_4"/>
      <node id="530" label="WP_053706403_2"/>
      <node id="528" label="AWS47415_3"/>
      <node id="526" label="WP_053706403_3"/>
      <node id="524" label="ANS68054_2"/>
      <node id="522" label="WP_019501955_10"/>
      <node id="520" label="WP_019501955_9007"/>
      <node id="519" label="WP_019501955_13"/>
      <node id="517" label="WP_136238412_3"/>
      <node id="516" label="WP_052269673_2"/>
      <node id="511" label="WP_086769105_5"/>
      <node id="509" label="WP_019505167_2"/>
      <node id="507" label="WP_019505167_3"/>
      <node id="506" label="WP_019505167_1"/>
      <node id="504" label="WP_170198719_1"/>
      <node id="502" label="WP_104258544_2"/>
      <node id="500" label="WP_145487439_2"/>
      <node id="498" label="WP_109595189_1"/>
      <node id="496" label="WP_145487439_1"/>
      <node id="493" label="WP_133890759_2"/>
      <node id="491" label="WP_093619522_4"/>
      <node id="489" label="WP_093619522_1"/>
      <node id="487" label="WP_130878496_1"/>
      <node id="485" label="WP_055704502_2"/>
      <node id="483" label="WP_052680420_2"/>
      <node id="481" label="WP_051700182_2"/>
      <node id="479" label="WP_093619522_5"/>
      <node id="477" label="WP_109595189_2"/>
      <node id="475" label="WP_052856102_2"/>
      <node id="473" label="WP_055704502_1"/>
      <node id="471" label="WP_157846946_2"/>
      <node id="469" label="WP_051700182_4"/>
      <node id="467" label="WP_052680420_3"/>
      <node id="465" label="WP_051837683_5"/>
      <node id="463" label="WP_157846946_1"/>
      <node id="461" label="WP_109595189_5"/>
      <node id="459" label="WP_133890759_3"/>
      <node id="457" label="ALC22075_5"/>
      <node id="455" label="WP_107777750_1"/>
      <node id="453" label="WP_079191916_2"/>
      <node id="451" label="WP_051837683_4"/>
      <node id="449" label="WP_051708270_1"/>
      <node id="447" label="WP_052680420_4"/>
      <node id="446" label="WP_079191916_3"/>
      <node id="443" label="WP_096589596_10"/>
      <node id="441" label="WP_099700413_4"/>
      <node id="439" label="WP_086760950_11"/>
      <node id="437" label="WP_099700413_2"/>
      <node id="435" label="WP_070396036_1"/>
      <node id="433" label="WP_168643398_7"/>
      <node id="432" label="WP_167721203_10"/>
      <node id="430" label="WP_049976882_1"/>
      <node id="428" label="WP_127931424_2"/>
      <node id="426" label="WP_079189213_2"/>
      <node id="424" label="WP_079181075_4"/>
      <node id="422" label="WP_052856102_3"/>
      <node id="420" label="WP_138666048_2"/>
      <node id="419" label="WP_138689268_3"/>
      <node id="417" label="WP_106289349_2"/>
      <node id="415" label="WP_027843178_3"/>
      <node id="406" label="WP_015207763_1"/>
      <node id="403" label="WP_087592205_6"/>
      <node id="400" label="WP_015207767_4"/>
      <node id="396" label="WP_068385845_3"/>
      <node id="394" label="WP_015216084_6"/>
      <node id="387" label="WP_096537472_3"/>
      <node id="385" label="WP_015207767_1"/>
      <node id="380" label="WP_155358788_1"/>
      <node id="378" label="WP_066371470_7"/>
      <node id="376" label="WP_062339008_2"/>
      <node id="374" label="WP_066371470_1"/>
      <node id="372" label="WP_062339008_5"/>
      <node id="370" label="WP_066371470_2"/>
      <node id="368" label="WP_062339008_4"/>
      <node id="366" label="WP_155358788_2"/>
      <node id="364" label="WP_155349848_3"/>
      <node id="362" label="WP_155349848_2"/>
      <node id="360" label="WP_062346719_1"/>
      <node id="359" label="WP_066371470_6"/>
      <node id="357" label="WP_017314970_1"/>
      <node id="355" label="WP_096689510_6"/>
      <node id="353" label="WP_106240815_3"/>
      <node id="351" label="WP_017314970_2"/>
      <node id="348" label="WP_086835908_1"/>
      <node id="345" label="WP_138499827_4"/>
      <node id="343" label="AVH79607_2"/>
      <node id="341" label="WP_006513161_3"/>
      <node id="339" label="WP_086769105_3"/>
      <node id="337" label="WP_012409787_3"/>
      <node id="335" label="WP_138499827_5"/>
      <node id="333" label="TRT88208_1"/>
      <node id="331" label="WP_012595952_5"/>
      <node id="329" label="WP_096689510_5"/>
      <node id="327" label="WP_002735885_4"/>
      <node id="325" label="WP_138499827_1"/>
      <node id="323" label="WP_096689510_2"/>
      <node id="321" label="WP_006197379_2"/>
      <node id="319" label="WP_017748579_3"/>
      <node id="317" label="WP_124970176_14"/>
      <node id="315" label="WP_103138325_3"/>
      <node id="313" label="WP_087542717_2"/>
      <node id="310" label="WP_099068319_5"/>
      <node id="308" label="WP_168643398_4"/>
      <node id="306" label="WP_127086205_4"/>
      <node id="304" label="WP_127086205_3"/>
      <node id="302" label="WP_070396036_3"/>
      <node id="300" label="WP_086769105_4"/>
      <node id="298" label="WP_017721129_1"/>
      <node id="296" label="WP_109013279_1"/>
      <node id="294" label="WP_012597836_4"/>
      <node id="292" label="WP_096580419_1"/>
      <node id="290" label="WP_015216084_10"/>
      <node id="288" label="WP_012597836_5"/>
      <node id="286" label="AVH79535_6"/>
      <node id="284" label="WP_106218514_1"/>
      <node id="281" label="WP_163927072_1"/>
      <node id="279" label="WP_087542717_3"/>
      <node id="277" label="WP_006619051_7"/>
      <node id="275" label="WP_073591536_1"/>
      <node id="273" label="WP_167725682_2"/>
      <node id="271" label="WP_015216084_5"/>
      <node id="269" label="WP_124970176_6"/>
      <node id="267" label="WP_124155194_2"/>
      <node id="265" label="WP_011610106_2"/>
      <node id="263" label="WP_168357543_5"/>
      <node id="261" label="OBQ18754_3"/>
      <node id="259" label="WP_038089561_4"/>
      <node id="257" label="WP_027402982_8"/>
      <node id="255" label="WP_013190203_4"/>
      <node id="252" label="WP_168645325_4"/>
      <node id="250" label="WP_168501874_4"/>
      <node id="248" label="WP_168465654_4"/>
      <node id="246" label="WP_009343975_4"/>
      <node id="244" label="WP_071189061_4"/>
      <node id="242" label="WP_148763415_5"/>
      <node id="240" label="BAZ29283_7"/>
      <node id="238" label="WP_057178590_8"/>
      <node id="236" label="OBQ18150_1"/>
      <node id="234" label="WP_168496018_3"/>
      <node id="232" label="WP_096664869_5"/>
      <node id="230" label="WP_137906310_5"/>
      <node id="228" label="WP_015078657_10"/>
      <node id="226" label="WP_114082527_7"/>
      <node id="224" label="OBQ36138_3"/>
      <node id="223" label="WP_096569967_6"/>
      <node id="221" label="WP_096730381_1"/>
      <node id="218" label="WP_066383651_4"/>
      <node id="216" label="WP_099071810_6"/>
      <node id="214" label="RCJ30949_5"/>
      <node id="212" label="WP_096575011_2"/>
      <node id="210" label="WP_026100063_6"/>
      <node id="208" label="WP_015155263_3"/>
      <node id="206" label="WP_089091039_3"/>
      <node id="204" label="WP_066383651_2"/>
      <node id="202" label="WP_006195640_7"/>
      <node id="200" label="WP_071189061_2"/>
      <node id="198" label="WP_096559014_8"/>
      <node id="196" label="WP_073644071_5"/>
      <node id="194" label="WP_168465654_1"/>
      <node id="192" label="WP_006195640_2"/>
      <node id="190" label="WP_096569967_4"/>
      <node id="188" label="WP_044449859_1"/>
      <node id="186" label="WP_096681247_2"/>
      <node id="184" label="TVP62740_6"/>
      <node id="182" label="WP_096569967_5"/>
      <node id="180" label="WP_096569967_3"/>
      <node id="178" label="OBQ36138_1"/>
      <node id="176" label="WP_162399505_4"/>
      <node id="174" label="BAZ29283_3"/>
      <node id="172" label="WP_011321056_5"/>
      <node id="170" label="WP_089091039_2"/>
      <node id="168" label="RCJ14929_3"/>
      <node id="166" label="WP_069073064_5"/>
      <node id="164" label="WP_096681247_5"/>
      <node id="162" label="WP_168645325_1"/>
      <node id="160" label="WP_096728455_2"/>
      <node id="158" label="WP_087539234_1"/>
      <node id="156" label="RCJ30949_4"/>
      <node id="154" label="WP_168496018_1"/>
      <node id="152" label="WP_096575011_3"/>
      <node id="150" label="BAZ29283_4"/>
      <node id="148" label="TVP62740_1"/>
      <node id="146" label="WP_096536886_1"/>
      <node id="144" label="OBQ01900_3"/>
      <node id="142" label="CEJ45116_1"/>
      <node id="140" label="WP_069073064_1"/>
      <node id="138" label="WP_071189061_3"/>
      <node id="136" label="RCJ30949_2"/>
      <node id="134" label="WP_069073064_6"/>
      <node id="132" label="WP_011321056_1"/>
      <node id="130" label="WP_015212417_2"/>
      <node id="128" label="OBQ18754_2"/>
      <node id="126" label="WP_096575011_6"/>
      <node id="124" label="WP_106240815_2"/>
      <node id="122" label="WP_013190203_1"/>
      <node id="120" label="WP_096559014_4"/>
      <node id="118" label="WP_087539234_7"/>
      <node id="116" label="WP_016950446_1"/>
      <node id="114" label="TAE59458_3"/>
      <node id="112" label="WP_009343975_1"/>
      <node id="110" label="WP_099071810_1"/>
      <node id="108" label="CEJ45116_5"/>
      <node id="106" label="WP_015210601_6"/>
      <node id="104" label="WP_087539234_4"/>
      <node id="102" label="WP_062295185_1"/>
      <node id="100" label="CEJ45116_2"/>
      <node id="98" label="WP_026100063_2"/>
      <node id="96" label="WP_162399505_5"/>
      <node id="94" label="WP_073639381_1"/>
      <node id="92" label="WP_096730381_2"/>
      <node id="90" label="BAZ29283_1"/>
      <node id="88" label="WP_096559014_5"/>
      <node id="86" label="WP_015113151_1"/>
      <node id="84" label="WP_099071810_2"/>
      <node id="82" label="WP_006195640_4"/>
      <node id="80" label="WP_015212417_1"/>
      <node id="78" label="WP_096536886_5"/>
      <node id="76" label="WP_066383651_5"/>
      <node id="74" label="WP_138498533_4"/>
      <node id="72" label="WP_096559014_1"/>
      <node id="71" label="WP_162399505_1"/>
      <edge id="32256" label="WP_089126833_2 (interacts with) WP_089126836_2" source="32254" target="32255" cy:directed="1"/>
      <edge id="32253" label="WP_016864763_5 (interacts with) WP_106218514_2" source="32251" target="32252" cy:directed="1"/>
      <edge id="32250" label="AWS47415_1 (interacts with) SNT25203_2" source="32248" target="32249" cy:directed="1"/>
      <edge id="32247" label="WP_045869173_1 (interacts with) WP_096594214_1" source="32245" target="32246" cy:directed="1"/>
      <edge id="32244" label="WP_159529421_2 (interacts with) AOX46105_1" source="32242" target="32243" cy:directed="1"/>
      <edge id="32241" label="WP_079189213_3 (interacts with) WP_145487439_3" source="32239" target="32240" cy:directed="1"/>
      <edge id="32238" label="AVH79607_3 (interacts with) WP_103138325_6" source="32236" target="32237" cy:directed="1"/>
      <edge id="32235" label="WP_006619051_3 (interacts with) WP_006622760_10" source="32233" target="32234" cy:directed="1"/>
      <edge id="32232" label="WP_150881471_1 (interacts with) WP_138989358_1" source="32230" target="32231" cy:directed="1"/>
      <edge id="32229" label="WP_096576751_2 (interacts with) WP_096576757_2" source="32227" target="32228" cy:directed="1"/>
      <edge id="32226" label="WP_045869173_3 (interacts with) WP_073591536_7" source="32224" target="32225" cy:directed="1"/>
      <edge id="32223" label="WP_015116255_1 (interacts with) WP_096659345_2" source="32221" target="32222" cy:directed="1"/>
      <edge id="32220" label="WP_129202808_4 (interacts with) WP_106331017_1" source="32218" target="32219" cy:directed="1"/>
      <edge id="32217" label="WP_125690181_2 (interacts with) WP_123798532_3" source="32215" target="32216" cy:directed="1"/>
      <edge id="32214" label="WP_096590410_1 (interacts with) WP_096590413_1" source="32212" target="32213" cy:directed="1"/>
      <edge id="32211" label="TVP63782_6 (interacts with) AVH79456_5" source="32209" target="32210" cy:directed="1"/>
      <edge id="32208" label="WP_088888836_2 (interacts with) RNJ67588_1" source="32206" target="32207" cy:directed="1"/>
      <edge id="32205" label="WP_017743137_2 (interacts with) WP_155752488_2" source="32203" target="32204" cy:directed="1"/>
      <edge id="32202" label="WP_131076036_1 (interacts with) WP_130690339_1" source="32200" target="32201" cy:directed="1"/>
      <edge id="32199" label="WP_015140719_2 (interacts with) WP_096681247_1" source="32197" target="32198" cy:directed="1"/>
      <edge id="32196" label="WP_051857755_3 (interacts with) WP_121024930_2" source="32194" target="32195" cy:directed="1"/>
      <edge id="32193" label="WP_095739934_1 (interacts with) WP_145385118_2" source="32191" target="32192" cy:directed="1"/>
      <edge id="32190" label="WP_155752488_4 (interacts with) WP_017743137_5" source="32188" target="32189" cy:directed="1"/>
      <edge id="32187" label="WP_067652746_4 (interacts with) WP_062451377_3" source="32185" target="32186" cy:directed="1"/>
      <edge id="32184" label="WP_084520237_4 (interacts with) WP_068028504_4" source="32182" target="32183" cy:directed="1"/>
      <edge id="32181" label="WP_169264746_3 (interacts with) WP_169264744_3" source="32179" target="32180" cy:directed="1"/>
      <edge id="32178" label="WP_045296661_3 (interacts with) KQP70226_3" source="32176" target="32177" cy:directed="1"/>
      <edge id="32175" label="WP_131076036_2 (interacts with) WP_156170590_2" source="32173" target="32174" cy:directed="1"/>
      <edge id="32172" label="WP_124970176_3 (interacts with) OGQ08743_2" source="32170" target="32171" cy:directed="1"/>
      <edge id="32169" label="KQP70226_1 (interacts with) WP_045296661_1" source="32167" target="32168" cy:directed="1"/>
      <edge id="32166" label="BAU44627_2 (interacts with) WP_172358022_1" source="32164" target="32165" cy:directed="1"/>
      <edge id="32163" label="WP_010996620_3 (interacts with) WP_096680266_2" source="32161" target="32162" cy:directed="1"/>
      <edge id="32160" label="WP_096681247_7 (interacts with) WP_070396421_1" source="32158" target="32159" cy:directed="1"/>
      <edge id="32157" label="WP_093116829_1 (interacts with) WP_093601002_8" source="32155" target="32156" cy:directed="1"/>
      <edge id="32154" label="WP_016950293_2 (interacts with) WP_127056592_3" source="32152" target="32153" cy:directed="1"/>
      <edge id="32151" label="WP_049976882_2 (interacts with) WP_052808529_3" source="32149" target="32150" cy:directed="1"/>
      <edge id="32148" label="WP_017743137_1 (interacts with) WP_155752488_1" source="32146" target="32147" cy:directed="1"/>
      <edge id="32145" label="AFY52807_6 (interacts with) RCJ25607_1" source="32143" target="32144" cy:directed="1"/>
      <edge id="32142" label="WP_096594214_3 (interacts with) WP_086837411_2" source="32140" target="32141" cy:directed="1"/>
      <edge id="32139" label="WP_017311237_2 (interacts with) WP_016863105_1" source="32137" target="32138" cy:directed="1"/>
      <edge id="32136" label="WP_012409362_1 (interacts with) WP_114082527_1" source="32134" target="32135" cy:directed="1"/>
      <edge id="32133" label="WP_127078868_2 (interacts with) WP_019495762_2" source="32131" target="32132" cy:directed="1"/>
      <edge id="32130" label="WP_015113151_5 (interacts with) WP_096575011_8" source="32128" target="32129" cy:directed="1"/>
      <edge id="32127" label="WP_110163988_3 (interacts with) WP_102116354_3" source="32125" target="32126" cy:directed="1"/>
      <edge id="32124" label="WP_006196066_4 (interacts with) TVP62142_3" source="32122" target="32123" cy:directed="1"/>
      <edge id="32121" label="WP_087103312_1 (interacts with) WP_067598320_1" source="32119" target="32120" cy:directed="1"/>
      <edge id="32118" label="WP_051642643_3 (interacts with) WP_047015652_3" source="32116" target="32117" cy:directed="1"/>
      <edge id="32115" label="WP_010996620_4 (interacts with) WP_096680266_4" source="32113" target="32114" cy:directed="1"/>
      <edge id="32112" label="WP_061955677_3 (interacts with) WP_131089594_3" source="32110" target="32111" cy:directed="1"/>
      <edge id="32109" label="WP_070396036_2 (interacts with) WP_071107270_3" source="32107" target="32108" cy:directed="1"/>
      <edge id="32106" label="TCM33822_1 (interacts with) WP_138897977_2" source="32104" target="32105" cy:directed="1"/>
      <edge id="32103" label="SNT25203_5 (interacts with) AWS47415_4" source="32101" target="32102" cy:directed="1"/>
      <edge id="32100" label="PSB62113_1 (interacts with) WP_083782609_1" source="32098" target="32099" cy:directed="1"/>
      <edge id="32097" label="WP_124200676_2 (interacts with) WP_096604516_2" source="32095" target="32096" cy:directed="1"/>
      <edge id="32094" label="WP_096680266_3 (interacts with) WP_010996620_2" source="32092" target="32093" cy:directed="1"/>
      <edge id="32091" label="WP_162060722_3 (interacts with) WP_110256027_2" source="32089" target="32090" cy:directed="1"/>
      <edge id="32088" label="WP_109497443_6 (interacts with) WP_109497443_5" source="32086" target="32087" cy:directed="1"/>
      <edge id="32085" label="WP_051840628_2 (interacts with) WP_125821548_3" source="32083" target="32084" cy:directed="1"/>
      <edge id="32082" label="WP_168880027_5 (interacts with) WP_018486514_2" source="32080" target="32081" cy:directed="1"/>
      <edge id="32079" label="WP_131089594_4 (interacts with) WP_061955677_6" source="32077" target="32078" cy:directed="1"/>
      <edge id="32076" label="WP_168880029_1 (interacts with) WP_168880027_1" source="32074" target="32075" cy:directed="1"/>
      <edge id="32073" label="WP_096547181_1 (interacts with) WP_162681093_1" source="32071" target="32072" cy:directed="1"/>
      <edge id="32070" label="WP_169264746_2 (interacts with) WP_169264744_2" source="32068" target="32069" cy:directed="1"/>
      <edge id="32067" label="WP_124970176_10 (interacts with) OGQ08743_4" source="32065" target="32066" cy:directed="1"/>
      <edge id="32064" label="WP_017311237_3 (interacts with) WP_016863105_2" source="32062" target="32063" cy:directed="1"/>
      <edge id="32061" label="WP_089126833_3 (interacts with) WP_089126836_3" source="32059" target="32060" cy:directed="1"/>
      <edge id="32058" label="WP_073619916_3 (interacts with) WP_073619916_2" source="32056" target="32057" cy:directed="1"/>
      <edge id="32055" label="WP_124155194_3 (interacts with) WP_124142959_2" source="32053" target="32054" cy:directed="1"/>
      <edge id="32052" label="AOX46105_4 (interacts with) WP_008380405_1" source="32050" target="32051" cy:directed="1"/>
      <edge id="32049" label="WP_155752488_3 (interacts with) WP_017743137_4" source="32047" target="32048" cy:directed="1"/>
      <edge id="32046" label="WP_006622760_12 (interacts with) WP_006622760_11" source="32044" target="32045" cy:directed="1"/>
      <edge id="32043" label="WP_015078657_8 (interacts with) TAE59458_9010" source="32041" target="32042" cy:directed="1"/>
      <edge id="32040" label="WP_096576751_3 (interacts with) WP_096576757_3" source="32038" target="32039" cy:directed="1"/>
      <edge id="32037" label="WP_026723183_3 (interacts with) AYJ47579_1" source="32035" target="32036" cy:directed="1"/>
      <edge id="32034" label="WP_016898474_2 (interacts with) WP_030061393_3" source="32032" target="32033" cy:directed="1"/>
      <edge id="32031" label="WP_093619522_6 (interacts with) WP_109595189_6" source="32029" target="32030" cy:directed="1"/>
      <edge id="32028" label="WP_155387558_1 (interacts with) WP_051837683_6" source="32026" target="32027" cy:directed="1"/>
      <edge id="32025" label="TKB91729_6 (interacts with) TKB91729_3" source="32023" target="32024" cy:directed="1"/>
      <edge id="32022" label="WP_008180360_7 (interacts with) WP_096605992_7" source="32020" target="32021" cy:directed="1"/>
      <edge id="32019" label="WP_006195640_3 (interacts with) WP_089091039_6" source="32017" target="32018" cy:directed="1"/>
      <edge id="32016" label="WP_087103312_2 (interacts with) WP_067598320_2" source="32014" target="32015" cy:directed="1"/>
      <edge id="32013" label="RCJ25433_2 (interacts with) WP_073642495_1" source="32011" target="32012" cy:directed="1"/>
      <edge id="32010" label="WP_120754718_4 (interacts with) WP_058047489_4" source="32008" target="32009" cy:directed="1"/>
      <edge id="32007" label="WP_075895564_1 (interacts with) BAZ30575_2" source="32005" target="32006" cy:directed="1"/>
      <edge id="32004" label="WP_102116354_1 (interacts with) WP_110163988_1" source="32002" target="32003" cy:directed="1"/>
      <edge id="32001" label="WP_015207763_2 (interacts with) WP_015207767_2" source="31999" target="32000" cy:directed="1"/>
      <edge id="31998" label="WP_128453384_1 (interacts with) WP_107961734_1" source="31996" target="31997" cy:directed="1"/>
      <edge id="31995" label="WP_079291565_3 (interacts with) WP_082604641_3" source="31993" target="31994" cy:directed="1"/>
      <edge id="31992" label="WP_156664522_1 (interacts with) WP_156664522_2" source="31990" target="31991" cy:directed="1"/>
      <edge id="31989" label="WP_089505437_2 (interacts with) WP_014173637_1" source="31987" target="31988" cy:directed="1"/>
      <edge id="31986" label="WP_096604516_1 (interacts with) WP_086837411_1" source="31984" target="31985" cy:directed="1"/>
      <edge id="31983" label="BBD66616_4 (interacts with) WP_006197379_1" source="31981" target="31982" cy:directed="1"/>
      <edge id="31980" label="WP_049802506_3 (interacts with) WP_013321440_2" source="31978" target="31979" cy:directed="1"/>
      <edge id="31977" label="WP_052752730_2 (interacts with) WP_108116368_1" source="31975" target="31976" cy:directed="1"/>
      <edge id="31974" label="WP_110256027_1 (interacts with) WP_162060722_2" source="31972" target="31973" cy:directed="1"/>
      <edge id="31971" label="RCJ31639_1 (interacts with) WP_087542717_6" source="31969" target="31970" cy:directed="1"/>
      <edge id="31968" label="WP_118166682_5 (interacts with) AFY52807_5" source="31966" target="31967" cy:directed="1"/>
      <edge id="31965" label="WP_051642643_1 (interacts with) WP_047015652_1" source="31963" target="31964" cy:directed="1"/>
      <edge id="31962" label="WP_069110514_3 (interacts with) WP_116947187_3" source="31960" target="31961" cy:directed="1"/>
      <edge id="31959" label="WP_094261964_2 (interacts with) WP_146082522_3" source="31957" target="31958" cy:directed="1"/>
      <edge id="31956" label="WP_168880029_2 (interacts with) WP_168880027_2" source="31954" target="31955" cy:directed="1"/>
      <edge id="31953" label="BAZ86949_2 (interacts with) WP_137908690_1" source="31951" target="31952" cy:directed="1"/>
      <edge id="31950" label="WP_096583741_2 (interacts with) WP_015111489_1" source="31948" target="31949" cy:directed="1"/>
      <edge id="31947" label="WP_013190653_2 (interacts with) WP_062294404_1" source="31945" target="31946" cy:directed="1"/>
      <edge id="31944" label="WP_086820178_2 (interacts with) WP_086820173_2" source="31942" target="31943" cy:directed="1"/>
      <edge id="31941" label="WP_068150862_4 (interacts with) WP_068099584_4" source="31939" target="31940" cy:directed="1"/>
      <edge id="31938" label="WP_051837683_2 (interacts with) WP_052680420_5" source="31936" target="31934" cy:directed="1"/>
      <edge id="31937" label="WP_051700182_3 (interacts with) WP_051837683_2" source="31933" target="31936" cy:directed="1"/>
      <edge id="31935" label="WP_051700182_3 (interacts with) WP_052680420_5" source="31933" target="31934" cy:directed="1"/>
      <edge id="31932" label="WP_153354547_2 (interacts with) WP_141683807_1" source="31930" target="31928" cy:directed="1"/>
      <edge id="31931" label="WP_153354547_2 (interacts with) WP_052158149_1" source="31930" target="31927" cy:directed="1"/>
      <edge id="31929" label="WP_052158149_1 (interacts with) WP_141683807_1" source="31927" target="31928" cy:directed="1"/>
      <edge id="31926" label="SFK92261_3 (interacts with) WP_093601002_6" source="31924" target="31921" cy:directed="1"/>
      <edge id="31925" label="SFK92261_3 (interacts with) WP_125792341_1" source="31924" target="31922" cy:directed="1"/>
      <edge id="31923" label="WP_093601002_6 (interacts with) WP_125792341_1" source="31921" target="31922" cy:directed="1"/>
      <edge id="31920" label="WP_018486514_4 (interacts with) WP_168880029_3" source="31916" target="31918" cy:directed="1"/>
      <edge id="31919" label="WP_168880027_4 (interacts with) WP_168880029_3" source="31915" target="31918" cy:directed="1"/>
      <edge id="31917" label="WP_168880027_4 (interacts with) WP_018486514_4" source="31915" target="31916" cy:directed="1"/>
      <edge id="31914" label="KQP70226_2 (interacts with) WP_045296661_2" source="31912" target="31910" cy:directed="1"/>
      <edge id="31913" label="WP_116195863_2 (interacts with) KQP70226_2" source="31909" target="31912" cy:directed="1"/>
      <edge id="31911" label="WP_116195863_2 (interacts with) WP_045296661_2" source="31909" target="31910" cy:directed="1"/>
      <edge id="31908" label="WP_084890433_1 (interacts with) WP_030169499_1" source="31905" target="31907" cy:directed="1"/>
      <edge id="31906" label="WP_141936425_1 (interacts with) WP_084890433_1" source="31904" target="31905" cy:directed="1"/>
      <edge id="31903" label="WP_052680420_6 (interacts with) WP_051700182_5" source="31899" target="31901" cy:directed="1"/>
      <edge id="31902" label="WP_051837683_7 (interacts with) WP_051700182_5" source="31898" target="31901" cy:directed="1"/>
      <edge id="31900" label="WP_051837683_7 (interacts with) WP_052680420_6" source="31898" target="31899" cy:directed="1"/>
      <edge id="31897" label="WP_055472496_2 (interacts with) WP_157777555_2" source="31895" target="31893" cy:directed="1"/>
      <edge id="31896" label="WP_171084023_2 (interacts with) WP_055472496_2" source="31892" target="31895" cy:directed="1"/>
      <edge id="31894" label="WP_171084023_2 (interacts with) WP_157777555_2" source="31892" target="31893" cy:directed="1"/>
      <edge id="31891" label="WP_167727925_1 (interacts with) WP_073619916_1" source="31889" target="31886" cy:directed="1"/>
      <edge id="31890" label="WP_167727925_1 (interacts with) WP_096592804_1" source="31889" target="31887" cy:directed="1"/>
      <edge id="31888" label="WP_073619916_1 (interacts with) WP_096592804_1" source="31886" target="31887" cy:directed="1"/>
      <edge id="31885" label="WP_051715083_2 (interacts with) WP_051859750_1" source="31883" target="31880" cy:directed="1"/>
      <edge id="31884" label="WP_051715083_2 (interacts with) WP_095933898_1" source="31883" target="31881" cy:directed="1"/>
      <edge id="31882" label="WP_051859750_1 (interacts with) WP_095933898_1" source="31880" target="31881" cy:directed="1"/>
      <edge id="31879" label="WP_096622718_3 (interacts with) WP_107115831_2" source="31877" target="31875" cy:directed="1"/>
      <edge id="31878" label="WP_096622718_3 (interacts with) WP_097866484_3" source="31877" target="31874" cy:directed="1"/>
      <edge id="31876" label="WP_097866484_3 (interacts with) WP_107115831_2" source="31874" target="31875" cy:directed="1"/>
      <edge id="31873" label="WP_168643398_5 (interacts with) WP_073591536_6" source="31871" target="31869" cy:directed="1"/>
      <edge id="31872" label="WP_168643398_5 (interacts with) WP_012409787_7" source="31871" target="31868" cy:directed="1"/>
      <edge id="31870" label="WP_012409787_7 (interacts with) WP_073591536_6" source="31868" target="31869" cy:directed="1"/>
      <edge id="31867" label="WP_006622760_4 (interacts with) WP_006622760_6" source="31865" target="31863" cy:directed="1"/>
      <edge id="31866" label="WP_006619051_1 (interacts with) WP_006622760_4" source="31862" target="31865" cy:directed="1"/>
      <edge id="31864" label="WP_006619051_1 (interacts with) WP_006622760_6" source="31862" target="31863" cy:directed="1"/>
      <edge id="31861" label="WP_165975342_4 (interacts with) WP_165975342_2" source="31857" target="31859" cy:directed="1"/>
      <edge id="31860" label="WP_165975342_5 (interacts with) WP_165975342_2" source="31856" target="31859" cy:directed="1"/>
      <edge id="31858" label="WP_165975342_5 (interacts with) WP_165975342_4" source="31856" target="31857" cy:directed="1"/>
      <edge id="31855" label="WP_069110514_2 (interacts with) WP_116947187_2" source="31853" target="31851" cy:directed="1"/>
      <edge id="31854" label="WP_069110514_2 (interacts with) WP_092614753_2" source="31853" target="31850" cy:directed="1"/>
      <edge id="31852" label="WP_092614753_2 (interacts with) WP_116947187_2" source="31850" target="31851" cy:directed="1"/>
      <edge id="31849" label="WP_067652746_1 (interacts with) WP_112963677_1" source="31845" target="31847" cy:directed="1"/>
      <edge id="31848" label="WP_042619690_1 (interacts with) WP_112963677_1" source="31844" target="31847" cy:directed="1"/>
      <edge id="31846" label="WP_042619690_1 (interacts with) WP_067652746_1" source="31844" target="31845" cy:directed="1"/>
      <edge id="31843" label="WP_172358022_2 (interacts with) BAU44627_5" source="31841" target="31838" cy:directed="1"/>
      <edge id="31842" label="WP_172358022_2 (interacts with) RMF68567_2" source="31841" target="31839" cy:directed="1"/>
      <edge id="31840" label="BAU44627_5 (interacts with) RMF68567_2" source="31838" target="31839" cy:directed="1"/>
      <edge id="31837" label="SFK92261_4 (interacts with) WP_093601002_3" source="31833" target="31836" cy:directed="1"/>
      <edge id="31835" label="SFK92261_4 (interacts with) WP_125792341_3" source="31833" target="31834" cy:directed="1"/>
      <edge id="31832" label="WP_104386798_3 (interacts with) WP_008232444_3" source="31830" target="31828" cy:directed="1"/>
      <edge id="31831" label="WP_104386798_3 (interacts with) WP_017315790_2" source="31830" target="31827" cy:directed="1"/>
      <edge id="31829" label="WP_017315790_2 (interacts with) WP_008232444_3" source="31827" target="31828" cy:directed="1"/>
      <edge id="31826" label="WP_082604641_1 (interacts with) AGP61345_2" source="31822" target="31825" cy:directed="1"/>
      <edge id="31824" label="WP_082604641_1 (interacts with) WP_079291565_2" source="31822" target="31823" cy:directed="1"/>
      <edge id="31821" label="WP_068099584_1 (interacts with) ANI93503_4" source="31819" target="31817" cy:directed="1"/>
      <edge id="31820" label="WP_068150862_1 (interacts with) WP_068099584_1" source="31816" target="31819" cy:directed="1"/>
      <edge id="31818" label="WP_068150862_1 (interacts with) ANI93503_4" source="31816" target="31817" cy:directed="1"/>
      <edge id="31815" label="AVH79628_7 (interacts with) AVH79662_5" source="31811" target="31814" cy:directed="1"/>
      <edge id="31813" label="AVH79628_7 (interacts with) WP_096679519_6" source="31811" target="31812" cy:directed="1"/>
      <edge id="31810" label="WP_096537288_1 (interacts with) WP_138498765_1" source="31808" target="31805" cy:directed="1"/>
      <edge id="31809" label="WP_096537288_1 (interacts with) OUC15299_1" source="31808" target="31806" cy:directed="1"/>
      <edge id="31807" label="WP_138498765_1 (interacts with) OUC15299_1" source="31805" target="31806" cy:directed="1"/>
      <edge id="31804" label="WP_068028504_5 (interacts with) WP_084520237_5" source="31802" target="31799" cy:directed="1"/>
      <edge id="31803" label="WP_068028504_5 (interacts with) PIR21572_3" source="31802" target="31800" cy:directed="1"/>
      <edge id="31801" label="WP_084520237_5 (interacts with) PIR21572_3" source="31799" target="31800" cy:directed="1"/>
      <edge id="31798" label="WP_141310912_4 (interacts with) WP_093908736_3" source="31796" target="31794" cy:directed="1"/>
      <edge id="31797" label="WP_031017311_3 (interacts with) WP_141310912_4" source="31793" target="31796" cy:directed="1"/>
      <edge id="31795" label="WP_031017311_3 (interacts with) WP_093908736_3" source="31793" target="31794" cy:directed="1"/>
      <edge id="31792" label="WP_087811088_1 (interacts with) WP_103811802_1" source="31788" target="31790" cy:directed="1"/>
      <edge id="31791" label="WP_059262025_1 (interacts with) WP_103811802_1" source="31787" target="31790" cy:directed="1"/>
      <edge id="31789" label="WP_059262025_1 (interacts with) WP_087811088_1" source="31787" target="31788" cy:directed="1"/>
      <edge id="31786" label="WP_094345265_2 (interacts with) WP_109006830_3" source="31784" target="31782" cy:directed="1"/>
      <edge id="31785" label="WP_094345265_2 (interacts with) WP_118166682_3" source="31784" target="31781" cy:directed="1"/>
      <edge id="31783" label="WP_118166682_3 (interacts with) WP_109006830_3" source="31781" target="31782" cy:directed="1"/>
      <edge id="31780" label="WP_086837411_3 (interacts with) WP_138498765_3" source="31776" target="31778" cy:directed="1"/>
      <edge id="31779" label="WP_015126776_3 (interacts with) WP_138498765_3" source="31775" target="31778" cy:directed="1"/>
      <edge id="31777" label="WP_015126776_3 (interacts with) WP_086837411_3" source="31775" target="31776" cy:directed="1"/>
      <edge id="31774" label="WP_008180360_2 (interacts with) WP_008180360_3" source="31770" target="31772" cy:directed="1"/>
      <edge id="31773" label="WP_008180360_1 (interacts with) WP_008180360_3" source="31769" target="31772" cy:directed="1"/>
      <edge id="31771" label="WP_008180360_1 (interacts with) WP_008180360_2" source="31769" target="31770" cy:directed="1"/>
      <edge id="31768" label="BAZ80283_3 (interacts with) WP_071187741_3" source="31767" target="31764" cy:directed="1"/>
      <edge id="31766" label="WP_071187741_3 (interacts with) AGP61345_3" source="31764" target="31765" cy:directed="1"/>
      <edge id="31763" label="WP_035905443_2 (interacts with) WP_055421432_1" source="31761" target="31759" cy:directed="1"/>
      <edge id="31762" label="WP_053706403_1 (interacts with) WP_035905443_2" source="31758" target="31761" cy:directed="1"/>
      <edge id="31760" label="WP_053706403_1 (interacts with) WP_055421432_1" source="31758" target="31759" cy:directed="1"/>
      <edge id="31757" label="WP_017655478_1 (interacts with) WP_015140719_1" source="31755" target="31752" cy:directed="1"/>
      <edge id="31756" label="WP_017655478_1 (interacts with) WP_103138325_2" source="31755" target="31753" cy:directed="1"/>
      <edge id="31754" label="WP_015140719_1 (interacts with) WP_103138325_2" source="31752" target="31753" cy:directed="1"/>
      <edge id="31751" label="WP_049976882_3 (interacts with) WP_052808529_2" source="31749" target="31747" cy:directed="1"/>
      <edge id="31750" label="WP_164394909_2 (interacts with) WP_049976882_3" source="31746" target="31749" cy:directed="1"/>
      <edge id="31748" label="WP_164394909_2 (interacts with) WP_052808529_2" source="31746" target="31747" cy:directed="1"/>
      <edge id="31745" label="WP_164496180_2 (interacts with) WP_060892878_5" source="31743" target="31741" cy:directed="1"/>
      <edge id="31744" label="ROV70439_4 (interacts with) WP_164496180_2" source="31740" target="31743" cy:directed="1"/>
      <edge id="31742" label="ROV70439_4 (interacts with) WP_060892878_5" source="31740" target="31741" cy:directed="1"/>
      <edge id="31739" label="WP_168645325_5 (interacts with) WP_027402982_4" source="31737" target="31734" cy:directed="1"/>
      <edge id="31738" label="WP_168645325_5 (interacts with) WP_148763415_4" source="31737" target="31735" cy:directed="1"/>
      <edge id="31736" label="WP_027402982_4 (interacts with) WP_148763415_4" source="31734" target="31735" cy:directed="1"/>
      <edge id="31733" label="WP_103138325_8 (interacts with) WP_015140719_3" source="31731" target="31728" cy:directed="1"/>
      <edge id="31732" label="WP_103138325_8 (interacts with) WP_017655478_2" source="31731" target="31729" cy:directed="1"/>
      <edge id="31730" label="WP_015140719_3 (interacts with) WP_017655478_2" source="31728" target="31729" cy:directed="1"/>
      <edge id="31727" label="WP_106331017_3 (interacts with) WP_109595189_3" source="31725" target="31723" cy:directed="1"/>
      <edge id="31726" label="WP_106331017_3 (interacts with) WP_093619522_2" source="31725" target="31722" cy:directed="1"/>
      <edge id="31724" label="WP_093619522_2 (interacts with) WP_109595189_3" source="31722" target="31723" cy:directed="1"/>
      <edge id="31721" label="WP_094345265_1 (interacts with) WP_109006830_1" source="31719" target="31716" cy:directed="1"/>
      <edge id="31720" label="WP_094345265_1 (interacts with) WP_118166682_2" source="31719" target="31717" cy:directed="1"/>
      <edge id="31718" label="WP_109006830_1 (interacts with) WP_118166682_2" source="31716" target="31717" cy:directed="1"/>
      <edge id="31715" label="TCK41348_1 (interacts with) WP_146082522_1" source="31713" target="31710" cy:directed="1"/>
      <edge id="31714" label="TCK41348_1 (interacts with) WP_094261964_1" source="31713" target="31711" cy:directed="1"/>
      <edge id="31712" label="WP_146082522_1 (interacts with) WP_094261964_1" source="31710" target="31711" cy:directed="1"/>
      <edge id="31709" label="WP_027402982_5 (interacts with) WP_168501874_3" source="31706" target="31700" cy:directed="1"/>
      <edge id="31708" label="WP_027402982_5 (interacts with) WP_104387267_2" source="31706" target="31703" cy:directed="1"/>
      <edge id="31707" label="WP_027402982_5 (interacts with) WP_168496018_2" source="31706" target="31701" cy:directed="1"/>
      <edge id="31705" label="WP_104387267_2 (interacts with) WP_168501874_3" source="31703" target="31700" cy:directed="1"/>
      <edge id="31704" label="WP_104387267_2 (interacts with) WP_168496018_2" source="31703" target="31701" cy:directed="1"/>
      <edge id="31702" label="WP_168501874_3 (interacts with) WP_168496018_2" source="31700" target="31701" cy:directed="1"/>
      <edge id="31699" label="WP_167721203_7 (interacts with) WP_096589596_9" source="31696" target="31693" cy:directed="1"/>
      <edge id="31698" label="WP_167721203_7 (interacts with) WP_104899482_5" source="31696" target="31691" cy:directed="1"/>
      <edge id="31697" label="WP_167721203_7 (interacts with) WP_086760950_8" source="31696" target="31690" cy:directed="1"/>
      <edge id="31695" label="WP_096589596_9 (interacts with) WP_104899482_5" source="31693" target="31691" cy:directed="1"/>
      <edge id="31694" label="WP_096589596_9 (interacts with) WP_086760950_8" source="31693" target="31690" cy:directed="1"/>
      <edge id="31692" label="WP_086760950_8 (interacts with) WP_104899482_5" source="31690" target="31691" cy:directed="1"/>
      <edge id="31688" label="RCJ34841_2 (interacts with) BAU44627_3" source="31684" target="31687" cy:directed="1"/>
      <edge id="31686" label="RCJ34841_2 (interacts with) BAZ15600_1" source="31684" target="31681" cy:directed="1"/>
      <edge id="31685" label="RCJ34841_2 (interacts with) WP_096620836_2" source="31684" target="31682" cy:directed="1"/>
      <edge id="31689" label="WP_096620836_2 (interacts with) BAU44627_3" source="31682" target="31687" cy:directed="1"/>
      <edge id="31683" label="BAZ15600_1 (interacts with) WP_096620836_2" source="31681" target="31682" cy:directed="1"/>
      <edge id="31680" label="WP_054237388_1 (interacts with) WP_015659226_3" source="31678" target="31673" cy:directed="1"/>
      <edge id="31679" label="WP_054237388_1 (interacts with) WP_153461219_1" source="31678" target="31675" cy:directed="1"/>
      <edge id="31677" label="WP_153461219_1 (interacts with) WP_015659226_3" source="31675" target="31673" cy:directed="1"/>
      <edge id="31676" label="WP_153461219_1 (interacts with) WP_060892878_1" source="31675" target="31672" cy:directed="1"/>
      <edge id="31674" label="WP_060892878_1 (interacts with) WP_015659226_3" source="31672" target="31673" cy:directed="1"/>
      <edge id="31670" label="WP_159037419_2 (interacts with) WP_039653089_2" source="31667" target="31665" cy:directed="1"/>
      <edge id="31669" label="WP_159037419_2 (interacts with) WP_046417231_2" source="31667" target="31663" cy:directed="1"/>
      <edge id="31668" label="WP_159037419_2 (interacts with) BBC15200_2" source="31667" target="31662" cy:directed="1"/>
      <edge id="31671" label="WP_039653089_2 (interacts with) WP_046417231_2" source="31665" target="31663" cy:directed="1"/>
      <edge id="31666" label="BBC15200_2 (interacts with) WP_039653089_2" source="31662" target="31665" cy:directed="1"/>
      <edge id="31664" label="BBC15200_2 (interacts with) WP_046417231_2" source="31662" target="31663" cy:directed="1"/>
      <edge id="31661" label="WP_114901352_1 (interacts with) WP_053002257_1" source="31658" target="31652" cy:directed="1"/>
      <edge id="31660" label="WP_114901352_1 (interacts with) WP_007095313_1" source="31658" target="31655" cy:directed="1"/>
      <edge id="31659" label="WP_114901352_1 (interacts with) WP_052752730_1" source="31658" target="31653" cy:directed="1"/>
      <edge id="31657" label="WP_007095313_1 (interacts with) WP_053002257_1" source="31655" target="31652" cy:directed="1"/>
      <edge id="31656" label="WP_007095313_1 (interacts with) WP_052752730_1" source="31655" target="31653" cy:directed="1"/>
      <edge id="31654" label="WP_053002257_1 (interacts with) WP_052752730_1" source="31652" target="31653" cy:directed="1"/>
      <edge id="31650" label="WP_141366901_1 (interacts with) WP_037567380_1" source="31647" target="31642" cy:directed="1"/>
      <edge id="31649" label="WP_141366901_1 (interacts with) WP_162681093_2" source="31647" target="31645" cy:directed="1"/>
      <edge id="31648" label="WP_141366901_1 (interacts with) WP_096547181_3" source="31647" target="31643" cy:directed="1"/>
      <edge id="31651" label="WP_162681093_2 (interacts with) WP_096547181_3" source="31645" target="31643" cy:directed="1"/>
      <edge id="31646" label="WP_037567380_1 (interacts with) WP_162681093_2" source="31642" target="31645" cy:directed="1"/>
      <edge id="31644" label="WP_037567380_1 (interacts with) WP_096547181_3" source="31642" target="31643" cy:directed="1"/>
      <edge id="31641" label="WP_166925083_1 (interacts with) WP_047775239_1" source="31638" target="31636" cy:directed="1"/>
      <edge id="31640" label="WP_166925083_1 (interacts with) WP_047775239_2" source="31638" target="31639" cy:directed="1"/>
      <edge id="31637" label="RZJ53728_2 (interacts with) WP_047775239_1" source="31635" target="31636" cy:directed="1"/>
      <edge id="31633" label="WP_008180360_5 (interacts with) WP_008180360_8" source="31630" target="31628" cy:directed="1"/>
      <edge id="31632" label="WP_008180360_5 (interacts with) WP_008180360_6" source="31630" target="31625" cy:directed="1"/>
      <edge id="31631" label="WP_008180360_5 (interacts with) WP_087592205_10" source="31630" target="31626" cy:directed="1"/>
      <edge id="31634" label="WP_008180360_8 (interacts with) WP_087592205_10" source="31628" target="31626" cy:directed="1"/>
      <edge id="31629" label="WP_008180360_6 (interacts with) WP_008180360_8" source="31625" target="31628" cy:directed="1"/>
      <edge id="31627" label="WP_008180360_6 (interacts with) WP_087592205_10" source="31625" target="31626" cy:directed="1"/>
      <edge id="31623" label="WP_086835908_9004 (interacts with) WP_086835908_9005" source="31620" target="31615" cy:directed="1"/>
      <edge id="31622" label="WP_086835908_9004 (interacts with) WP_086835908_9007" source="31620" target="31618" cy:directed="1"/>
      <edge id="31621" label="WP_086835908_9004 (interacts with) WP_086835908_9006" source="31620" target="31616" cy:directed="1"/>
      <edge id="31624" label="WP_086835908_9006 (interacts with) WP_086835908_9007" source="31616" target="31618" cy:directed="1"/>
      <edge id="31619" label="WP_086835908_9005 (interacts with) WP_086835908_9007" source="31615" target="31618" cy:directed="1"/>
      <edge id="31617" label="WP_086835908_9005 (interacts with) WP_086835908_9006" source="31615" target="31616" cy:directed="1"/>
      <edge id="31614" label="WP_099700413_5 (interacts with) WP_015189896_4" source="31611" target="31605" cy:directed="1"/>
      <edge id="31613" label="WP_099700413_5 (interacts with) WP_096597905_1" source="31611" target="31606" cy:directed="1"/>
      <edge id="31612" label="WP_099700413_5 (interacts with) WP_105222244_4" source="31611" target="31608" cy:directed="1"/>
      <edge id="31610" label="WP_105222244_4 (interacts with) WP_015189896_4" source="31608" target="31605" cy:directed="1"/>
      <edge id="31609" label="WP_105222244_4 (interacts with) WP_096597905_1" source="31608" target="31606" cy:directed="1"/>
      <edge id="31607" label="WP_015189896_4 (interacts with) WP_096597905_1" source="31605" target="31606" cy:directed="1"/>
      <edge id="31604" label="WP_068208510_3 (interacts with) KKT87137_2" source="31598" target="31600" cy:directed="1"/>
      <edge id="31603" label="WP_068208510_3 (interacts with) WP_125690181_3" source="31598" target="31602" cy:directed="1"/>
      <edge id="31601" label="WP_068252194_3 (interacts with) KKT87137_2" source="31597" target="31600" cy:directed="1"/>
      <edge id="31599" label="WP_068252194_3 (interacts with) WP_068208510_3" source="31597" target="31598" cy:directed="1"/>
      <edge id="31595" label="OBQ23191_1 (interacts with) WP_027403439_1" source="31592" target="31590" cy:directed="1"/>
      <edge id="31594" label="OBQ23191_1 (interacts with) BAZ86949_1" source="31592" target="31587" cy:directed="1"/>
      <edge id="31593" label="OBQ23191_1 (interacts with) WP_168646604_1" source="31592" target="31588" cy:directed="1"/>
      <edge id="31596" label="WP_027403439_1 (interacts with) WP_168646604_1" source="31590" target="31588" cy:directed="1"/>
      <edge id="31591" label="BAZ86949_1 (interacts with) WP_027403439_1" source="31587" target="31590" cy:directed="1"/>
      <edge id="31589" label="BAZ86949_1 (interacts with) WP_168646604_1" source="31587" target="31588" cy:directed="1"/>
      <edge id="31585" label="WP_073619367_2 (interacts with) TWH40986_2" source="31582" target="31580" cy:directed="1"/>
      <edge id="31584" label="WP_073619367_2 (interacts with) BAZ15600_3" source="31582" target="31577" cy:directed="1"/>
      <edge id="31583" label="WP_073619367_2 (interacts with) WP_026093360_2" source="31582" target="31578" cy:directed="1"/>
      <edge id="31586" label="TWH40986_2 (interacts with) WP_026093360_2" source="31580" target="31578" cy:directed="1"/>
      <edge id="31581" label="BAZ15600_3 (interacts with) TWH40986_2" source="31577" target="31580" cy:directed="1"/>
      <edge id="31579" label="BAZ15600_3 (interacts with) WP_026093360_2" source="31577" target="31578" cy:directed="1"/>
      <edge id="31574" label="WP_015193424_1 (interacts with) WP_015193424_2" source="31572" target="31573" cy:directed="1"/>
      <edge id="31576" label="WP_109003510_1 (interacts with) WP_015193424_1" source="31570" target="31572" cy:directed="1"/>
      <edge id="31575" label="WP_109003510_1 (interacts with) WP_015193424_2" source="31570" target="31573" cy:directed="1"/>
      <edge id="31571" label="WP_016495430_1 (interacts with) WP_109003510_1" source="31569" target="31570" cy:directed="1"/>
      <edge id="31568" label="WP_141936425_5 (interacts with) WP_170198719_3" source="31567" target="31559" cy:directed="1"/>
      <edge id="31566" label="WP_137451632_5 (interacts with) WP_170198719_3" source="31564" target="31559" cy:directed="1"/>
      <edge id="31563" label="WP_078760724_3 (interacts with) WP_170198719_3" source="31562" target="31559" cy:directed="1"/>
      <edge id="31565" label="AWS47415_7 (interacts with) WP_137451632_5" source="31560" target="31564" cy:directed="1"/>
      <edge id="31561" label="WP_170198719_3 (interacts with) AWS47415_7" source="31559" target="31560" cy:directed="1"/>
      <edge id="31558" label="WP_062437448_5 (interacts with) WP_161483240_5" source="31554" target="31550" cy:directed="1"/>
      <edge id="31557" label="WP_062437448_5 (interacts with) WP_137248807_5" source="31554" target="31547" cy:directed="1"/>
      <edge id="31556" label="WP_062437448_5 (interacts with) WP_030452416_5" source="31554" target="31545" cy:directed="1"/>
      <edge id="31555" label="WP_062437448_5 (interacts with) WP_062348671_5" source="31554" target="31544" cy:directed="1"/>
      <edge id="31553" label="WP_161483240_5 (interacts with) WP_137248807_5" source="31550" target="31547" cy:directed="1"/>
      <edge id="31552" label="WP_161483240_5 (interacts with) WP_030452416_5" source="31550" target="31545" cy:directed="1"/>
      <edge id="31551" label="WP_161483240_5 (interacts with) WP_062348671_5" source="31550" target="31544" cy:directed="1"/>
      <edge id="31549" label="WP_137248807_5 (interacts with) WP_030452416_5" source="31547" target="31545" cy:directed="1"/>
      <edge id="31548" label="WP_137248807_5 (interacts with) WP_062348671_5" source="31547" target="31544" cy:directed="1"/>
      <edge id="31546" label="WP_062348671_5 (interacts with) WP_030452416_5" source="31544" target="31545" cy:directed="1"/>
      <edge id="31542" label="WP_051642643_2 (interacts with) WP_047015652_2" source="31536" target="31529" cy:directed="1"/>
      <edge id="31541" label="WP_051642643_2 (interacts with) WP_159425396_2" source="31536" target="31532" cy:directed="1"/>
      <edge id="31540" label="WP_051642643_2 (interacts with) WP_051368293_2" source="31536" target="31530" cy:directed="1"/>
      <edge id="31539" label="TDT36016_4 (interacts with) WP_159425396_2" source="31534" target="31532" cy:directed="1"/>
      <edge id="31538" label="TDT36016_4 (interacts with) WP_047015652_2" source="31534" target="31529" cy:directed="1"/>
      <edge id="31537" label="TDT36016_4 (interacts with) WP_051642643_2" source="31534" target="31536" cy:directed="1"/>
      <edge id="31535" label="TDT36016_4 (interacts with) WP_051368293_2" source="31534" target="31530" cy:directed="1"/>
      <edge id="31543" label="WP_159425396_2 (interacts with) WP_051368293_2" source="31532" target="31530" cy:directed="1"/>
      <edge id="31533" label="WP_047015652_2 (interacts with) WP_159425396_2" source="31529" target="31532" cy:directed="1"/>
      <edge id="31531" label="WP_047015652_2 (interacts with) WP_051368293_2" source="31529" target="31530" cy:directed="1"/>
      <edge id="31523" label="WP_099071810_5 (interacts with) RCJ14929_7" source="31521" target="31519" cy:directed="1"/>
      <edge id="31528" label="WP_096536886_7 (interacts with) WP_099071810_5" source="31517" target="31521" cy:directed="1"/>
      <edge id="31527" label="WP_096536886_7 (interacts with) RCJ14929_7" source="31517" target="31519" cy:directed="1"/>
      <edge id="31526" label="WP_096536886_7 (interacts with) WP_096559014_2" source="31517" target="31515" cy:directed="1"/>
      <edge id="31525" label="WP_096559014_2 (interacts with) WP_099071810_5" source="31515" target="31521" cy:directed="1"/>
      <edge id="31524" label="WP_096559014_2 (interacts with) RCJ14929_7" source="31515" target="31519" cy:directed="1"/>
      <edge id="31522" label="WP_073644071_7 (interacts with) WP_099071810_5" source="31514" target="31521" cy:directed="1"/>
      <edge id="31520" label="WP_073644071_7 (interacts with) RCJ14929_7" source="31514" target="31519" cy:directed="1"/>
      <edge id="31518" label="WP_073644071_7 (interacts with) WP_096536886_7" source="31514" target="31517" cy:directed="1"/>
      <edge id="31516" label="WP_073644071_7 (interacts with) WP_096559014_2" source="31514" target="31515" cy:directed="1"/>
      <edge id="31512" label="WP_135099815_3 (interacts with) WP_092614753_1" source="31508" target="31499" cy:directed="1"/>
      <edge id="31511" label="WP_135099815_3 (interacts with) WP_069110514_1" source="31508" target="31504" cy:directed="1"/>
      <edge id="31510" label="WP_135099815_3 (interacts with) WP_116947187_1" source="31508" target="31502" cy:directed="1"/>
      <edge id="31509" label="WP_135099815_3 (interacts with) WP_135099815_2" source="31508" target="31500" cy:directed="1"/>
      <edge id="31507" label="WP_069110514_1 (interacts with) WP_092614753_1" source="31504" target="31499" cy:directed="1"/>
      <edge id="31506" label="WP_069110514_1 (interacts with) WP_116947187_1" source="31504" target="31502" cy:directed="1"/>
      <edge id="31505" label="WP_069110514_1 (interacts with) WP_135099815_2" source="31504" target="31500" cy:directed="1"/>
      <edge id="31513" label="WP_135099815_2 (interacts with) WP_116947187_1" source="31500" target="31502" cy:directed="1"/>
      <edge id="31503" label="WP_092614753_1 (interacts with) WP_116947187_1" source="31499" target="31502" cy:directed="1"/>
      <edge id="31501" label="WP_092614753_1 (interacts with) WP_135099815_2" source="31499" target="31500" cy:directed="1"/>
      <edge id="31495" label="WP_093908736_5 (interacts with) WP_157857956_3" source="31493" target="31489" cy:directed="1"/>
      <edge id="31498" label="WP_106331017_5 (interacts with) WP_094742457_4" source="31491" target="31497" cy:directed="1"/>
      <edge id="31496" label="WP_106331017_5 (interacts with) WP_157857956_3" source="31491" target="31489" cy:directed="1"/>
      <edge id="31494" label="WP_051418997_2 (interacts with) WP_093908736_5" source="31488" target="31493" cy:directed="1"/>
      <edge id="31492" label="WP_051418997_2 (interacts with) WP_106331017_5" source="31488" target="31491" cy:directed="1"/>
      <edge id="31490" label="WP_051418997_2 (interacts with) WP_157857956_3" source="31488" target="31489" cy:directed="1"/>
      <edge id="31485" label="WP_166551441_2 (interacts with) WP_109741224_4" source="31482" target="31478" cy:directed="1"/>
      <edge id="31484" label="WP_166551441_2 (interacts with) WP_141234752_1" source="31482" target="31483" cy:directed="1"/>
      <edge id="31487" label="WP_122933410_1 (interacts with) WP_109741224_4" source="31480" target="31478" cy:directed="1"/>
      <edge id="31486" label="WP_122933410_1 (interacts with) WP_141234752_1" source="31480" target="31483" cy:directed="1"/>
      <edge id="31481" label="WP_028525980_3 (interacts with) WP_122933410_1" source="31477" target="31480" cy:directed="1"/>
      <edge id="31479" label="WP_028525980_3 (interacts with) WP_109741224_4" source="31477" target="31478" cy:directed="1"/>
      <edge id="31476" label="WP_144874993_3 (interacts with) WP_094345265_4" source="31475" target="31466" cy:directed="1"/>
      <edge id="31473" label="WP_138498765_2 (interacts with) RCJ34841_3" source="31470" target="31468" cy:directed="1"/>
      <edge id="31472" label="WP_138498765_2 (interacts with) WP_012409237_5" source="31470" target="31465" cy:directed="1"/>
      <edge id="31471" label="WP_138498765_2 (interacts with) WP_094345265_4" source="31470" target="31466" cy:directed="1"/>
      <edge id="31474" label="RCJ34841_3 (interacts with) WP_094345265_4" source="31468" target="31466" cy:directed="1"/>
      <edge id="31469" label="WP_012409237_5 (interacts with) RCJ34841_3" source="31465" target="31468" cy:directed="1"/>
      <edge id="31467" label="WP_012409237_5 (interacts with) WP_094345265_4" source="31465" target="31466" cy:directed="1"/>
      <edge id="31461" label="WP_042619690_6 (interacts with) WP_067652746_3" source="31457" target="31450" cy:directed="1"/>
      <edge id="31460" label="WP_042619690_6 (interacts with) WP_111838980_2" source="31457" target="31451" cy:directed="1"/>
      <edge id="31464" label="WP_062451377_2 (interacts with) WP_067652746_3" source="31454" target="31450" cy:directed="1"/>
      <edge id="31463" label="WP_062451377_2 (interacts with) WP_042619690_6" source="31454" target="31457" cy:directed="1"/>
      <edge id="31462" label="WP_062451377_2 (interacts with) WP_111838980_2" source="31454" target="31451" cy:directed="1"/>
      <edge id="31459" label="WP_112963677_3 (interacts with) WP_067652746_3" source="31453" target="31450" cy:directed="1"/>
      <edge id="31458" label="WP_112963677_3 (interacts with) WP_042619690_6" source="31453" target="31457" cy:directed="1"/>
      <edge id="31456" label="WP_112963677_3 (interacts with) WP_111838980_2" source="31453" target="31451" cy:directed="1"/>
      <edge id="31455" label="WP_112963677_3 (interacts with) WP_062451377_2" source="31453" target="31454" cy:directed="1"/>
      <edge id="31452" label="WP_067652746_3 (interacts with) WP_111838980_2" source="31450" target="31451" cy:directed="1"/>
      <edge id="31449" label="WP_137248807_2 (interacts with) WP_030452416_2" source="31442" target="31438" cy:directed="1"/>
      <edge id="31448" label="WP_137248807_2 (interacts with) WP_062348671_2" source="31442" target="31440" cy:directed="1"/>
      <edge id="31447" label="WP_137248807_2 (interacts with) WP_161483240_2" source="31442" target="31436" cy:directed="1"/>
      <edge id="31446" label="WP_030452416_2 (interacts with) WP_062348671_2" source="31438" target="31440" cy:directed="1"/>
      <edge id="31445" label="WP_030452416_2 (interacts with) WP_161483240_2" source="31438" target="31436" cy:directed="1"/>
      <edge id="31444" label="WP_161483240_2 (interacts with) WP_062348671_2" source="31436" target="31440" cy:directed="1"/>
      <edge id="31443" label="WP_062437448_2 (interacts with) WP_137248807_2" source="31435" target="31442" cy:directed="1"/>
      <edge id="31441" label="WP_062437448_2 (interacts with) WP_062348671_2" source="31435" target="31440" cy:directed="1"/>
      <edge id="31439" label="WP_062437448_2 (interacts with) WP_030452416_2" source="31435" target="31438" cy:directed="1"/>
      <edge id="31437" label="WP_062437448_2 (interacts with) WP_161483240_2" source="31435" target="31436" cy:directed="1"/>
      <edge id="31434" label="WP_111838980_1 (interacts with) WP_067652746_2" source="31431" target="31424" cy:directed="1"/>
      <edge id="31433" label="WP_111838980_1 (interacts with) WP_062451377_1" source="31431" target="31426" cy:directed="1"/>
      <edge id="31432" label="WP_111838980_1 (interacts with) WP_042619690_5" source="31431" target="31422" cy:directed="1"/>
      <edge id="31429" label="WP_062451377_1 (interacts with) WP_067652746_2" source="31426" target="31424" cy:directed="1"/>
      <edge id="31428" label="WP_062451377_1 (interacts with) WP_112963677_2" source="31426" target="31421" cy:directed="1"/>
      <edge id="31427" label="WP_062451377_1 (interacts with) WP_042619690_5" source="31426" target="31422" cy:directed="1"/>
      <edge id="31430" label="WP_042619690_5 (interacts with) WP_067652746_2" source="31422" target="31424" cy:directed="1"/>
      <edge id="31425" label="WP_112963677_2 (interacts with) WP_067652746_2" source="31421" target="31424" cy:directed="1"/>
      <edge id="31423" label="WP_112963677_2 (interacts with) WP_042619690_5" source="31421" target="31422" cy:directed="1"/>
      <edge id="31417" label="WP_012409237_1 (interacts with) WP_012409237_4" source="31414" target="31402" cy:directed="1"/>
      <edge id="31416" label="WP_012409237_1 (interacts with) WP_094345265_3" source="31414" target="31403" cy:directed="1"/>
      <edge id="31415" label="WP_012409237_1 (interacts with) WP_109006830_2" source="31414" target="31408" cy:directed="1"/>
      <edge id="31413" label="WP_109006830_2 (interacts with) WP_012409237_4" source="31408" target="31402" cy:directed="1"/>
      <edge id="31412" label="WP_109006830_2 (interacts with) WP_094345265_3" source="31408" target="31403" cy:directed="1"/>
      <edge id="31420" label="WP_006619051_2 (interacts with) WP_012409237_4" source="31406" target="31402" cy:directed="1"/>
      <edge id="31419" label="WP_006619051_2 (interacts with) WP_094345265_3" source="31406" target="31403" cy:directed="1"/>
      <edge id="31418" label="WP_006619051_2 (interacts with) WP_109006830_2" source="31406" target="31408" cy:directed="1"/>
      <edge id="31411" label="WP_006622760_5 (interacts with) WP_012409237_4" source="31405" target="31402" cy:directed="1"/>
      <edge id="31410" label="WP_006622760_5 (interacts with) WP_094345265_3" source="31405" target="31403" cy:directed="1"/>
      <edge id="31409" label="WP_006622760_5 (interacts with) WP_109006830_2" source="31405" target="31408" cy:directed="1"/>
      <edge id="31407" label="WP_006622760_5 (interacts with) WP_006619051_2" source="31405" target="31406" cy:directed="1"/>
      <edge id="31404" label="WP_012409237_4 (interacts with) WP_094345265_3" source="31402" target="31403" cy:directed="1"/>
      <edge id="31400" label="TAE58797_2 (interacts with) WP_103138934_3" source="31395" target="31384" cy:directed="1"/>
      <edge id="31399" label="TAE58797_2 (interacts with) WP_095720237_2" source="31395" target="31392" cy:directed="1"/>
      <edge id="31398" label="TAE58797_2 (interacts with) WP_089092704_3" source="31395" target="31389" cy:directed="1"/>
      <edge id="31397" label="TAE58797_2 (interacts with) BAZ29305_3" source="31395" target="31387" cy:directed="1"/>
      <edge id="31396" label="TAE58797_2 (interacts with) WP_096561092_3" source="31395" target="31385" cy:directed="1"/>
      <edge id="31394" label="WP_095720237_2 (interacts with) WP_089092704_3" source="31392" target="31389" cy:directed="1"/>
      <edge id="31393" label="WP_095720237_2 (interacts with) BAZ29305_3" source="31392" target="31387" cy:directed="1"/>
      <edge id="31391" label="BAZ29305_3 (interacts with) WP_089092704_3" source="31387" target="31389" cy:directed="1"/>
      <edge id="31401" label="WP_096561092_3 (interacts with) BAZ29305_3" source="31385" target="31387" cy:directed="1"/>
      <edge id="31390" label="WP_103138934_3 (interacts with) WP_089092704_3" source="31384" target="31389" cy:directed="1"/>
      <edge id="31388" label="WP_103138934_3 (interacts with) BAZ29305_3" source="31384" target="31387" cy:directed="1"/>
      <edge id="31386" label="WP_103138934_3 (interacts with) WP_096561092_3" source="31384" target="31385" cy:directed="1"/>
      <edge id="31376" label="WP_168465654_9 (interacts with) WP_015078657_11" source="31372" target="31368" cy:directed="1"/>
      <edge id="31375" label="WP_168465654_9 (interacts with) WP_027402982_9" source="31372" target="31366" cy:directed="1"/>
      <edge id="31379" label="WP_096664869_8 (interacts with) WP_168465654_9" source="31370" target="31372" cy:directed="1"/>
      <edge id="31378" label="WP_096664869_8 (interacts with) WP_015078657_11" source="31370" target="31368" cy:directed="1"/>
      <edge id="31377" label="WP_096664869_8 (interacts with) WP_027402982_9" source="31370" target="31366" cy:directed="1"/>
      <edge id="31374" label="WP_015078657_11 (interacts with) WP_027402982_9" source="31368" target="31366" cy:directed="1"/>
      <edge id="31383" label="WP_168645325_7 (interacts with) WP_168465654_9" source="31364" target="31372" cy:directed="1"/>
      <edge id="31382" label="WP_168645325_7 (interacts with) WP_096664869_8" source="31364" target="31370" cy:directed="1"/>
      <edge id="31381" label="WP_168645325_7 (interacts with) WP_015078657_11" source="31364" target="31368" cy:directed="1"/>
      <edge id="31380" label="WP_168645325_7 (interacts with) WP_027402982_9" source="31364" target="31366" cy:directed="1"/>
      <edge id="31373" label="WP_148763415_7 (interacts with) WP_168465654_9" source="31363" target="31372" cy:directed="1"/>
      <edge id="31371" label="WP_148763415_7 (interacts with) WP_096664869_8" source="31363" target="31370" cy:directed="1"/>
      <edge id="31369" label="WP_148763415_7 (interacts with) WP_015078657_11" source="31363" target="31368" cy:directed="1"/>
      <edge id="31367" label="WP_148763415_7 (interacts with) WP_027402982_9" source="31363" target="31366" cy:directed="1"/>
      <edge id="31365" label="WP_148763415_7 (interacts with) WP_168645325_7" source="31363" target="31364" cy:directed="1"/>
      <edge id="31362" label="WP_096664869_6 (interacts with) WP_015078657_5" source="31357" target="31345" cy:directed="1"/>
      <edge id="31361" label="WP_096664869_6 (interacts with) WP_148763415_3" source="31357" target="31352" cy:directed="1"/>
      <edge id="31360" label="WP_096664869_6 (interacts with) WP_027402982_1" source="31357" target="31348" cy:directed="1"/>
      <edge id="31359" label="WP_096664869_6 (interacts with) WP_168465654_5" source="31357" target="31342" cy:directed="1"/>
      <edge id="31358" label="WP_096664869_6 (interacts with) WP_168645325_2" source="31357" target="31343" cy:directed="1"/>
      <edge id="31356" label="WP_148763415_3 (interacts with) WP_015078657_5" source="31352" target="31345" cy:directed="1"/>
      <edge id="31355" label="WP_148763415_3 (interacts with) WP_027402982_1" source="31352" target="31348" cy:directed="1"/>
      <edge id="31354" label="WP_148763415_3 (interacts with) WP_168645325_2" source="31352" target="31343" cy:directed="1"/>
      <edge id="31353" label="WP_148763415_3 (interacts with) WP_168465654_5" source="31352" target="31342" cy:directed="1"/>
      <edge id="31351" label="WP_027402982_1 (interacts with) WP_015078657_5" source="31348" target="31345" cy:directed="1"/>
      <edge id="31350" label="WP_027402982_1 (interacts with) WP_168645325_2" source="31348" target="31343" cy:directed="1"/>
      <edge id="31349" label="WP_027402982_1 (interacts with) WP_168465654_5" source="31348" target="31342" cy:directed="1"/>
      <edge id="31347" label="WP_015078657_5 (interacts with) WP_168645325_2" source="31345" target="31343" cy:directed="1"/>
      <edge id="31346" label="WP_015078657_5 (interacts with) WP_168465654_5" source="31345" target="31342" cy:directed="1"/>
      <edge id="31344" label="WP_168465654_5 (interacts with) WP_168645325_2" source="31342" target="31343" cy:directed="1"/>
      <edge id="31341" label="WP_136238412_2 (interacts with) WP_109497443_1" source="31338" target="31335" cy:directed="1"/>
      <edge id="31340" label="WP_136238412_2 (interacts with) WP_051851944_2" source="31338" target="31331" cy:directed="1"/>
      <edge id="31339" label="WP_136238412_2 (interacts with) WP_128433866_3" source="31338" target="31329" cy:directed="1"/>
      <edge id="31337" label="WP_109497443_1 (interacts with) WP_051851944_2" source="31335" target="31331" cy:directed="1"/>
      <edge id="31336" label="WP_109497443_1 (interacts with) WP_128433866_3" source="31335" target="31329" cy:directed="1"/>
      <edge id="31334" label="WP_053560627_2 (interacts with) WP_139627778_3" source="31333" target="31328" cy:directed="1"/>
      <edge id="31332" label="WP_051851944_2 (interacts with) WP_128433866_3" source="31331" target="31329" cy:directed="1"/>
      <edge id="31330" label="WP_139627778_3 (interacts with) WP_128433866_3" source="31328" target="31329" cy:directed="1"/>
      <edge id="31324" label="WP_073643028_2 (interacts with) BAZ33272_3" source="31316" target="31312" cy:directed="1"/>
      <edge id="31323" label="WP_073643028_2 (interacts with) WP_096537472_1" source="31316" target="31310" cy:directed="1"/>
      <edge id="31322" label="WP_073643028_2 (interacts with) WP_096664869_3" source="31316" target="31307" cy:directed="1"/>
      <edge id="31321" label="WP_073643028_2 (interacts with) WP_099068319_1" source="31316" target="31308" cy:directed="1"/>
      <edge id="31320" label="WP_138498533_5 (interacts with) BAZ33272_3" source="31314" target="31312" cy:directed="1"/>
      <edge id="31319" label="WP_138498533_5 (interacts with) WP_096537472_1" source="31314" target="31310" cy:directed="1"/>
      <edge id="31318" label="WP_138498533_5 (interacts with) WP_096664869_3" source="31314" target="31307" cy:directed="1"/>
      <edge id="31317" label="WP_138498533_5 (interacts with) WP_073643028_2" source="31314" target="31316" cy:directed="1"/>
      <edge id="31315" label="WP_138498533_5 (interacts with) WP_099068319_1" source="31314" target="31308" cy:directed="1"/>
      <edge id="31325" label="WP_096537472_1 (interacts with) BAZ33272_3" source="31310" target="31312" cy:directed="1"/>
      <edge id="31327" label="WP_099068319_1 (interacts with) BAZ33272_3" source="31308" target="31312" cy:directed="1"/>
      <edge id="31326" label="WP_099068319_1 (interacts with) WP_096537472_1" source="31308" target="31310" cy:directed="1"/>
      <edge id="31313" label="WP_096664869_3 (interacts with) BAZ33272_3" source="31307" target="31312" cy:directed="1"/>
      <edge id="31311" label="WP_096664869_3 (interacts with) WP_096537472_1" source="31307" target="31310" cy:directed="1"/>
      <edge id="31309" label="WP_096664869_3 (interacts with) WP_099068319_1" source="31307" target="31308" cy:directed="1"/>
      <edge id="31298" label="WP_097216730_2 (interacts with) WP_135072443_2" source="31292" target="31279" cy:directed="1"/>
      <edge id="31297" label="WP_097216730_2 (interacts with) WP_052479947_4" source="31292" target="31286" cy:directed="1"/>
      <edge id="31296" label="WP_097216730_2 (interacts with) WP_078077257_2" source="31292" target="31288" cy:directed="1"/>
      <edge id="31295" label="WP_097216730_2 (interacts with) WP_104779873_1" source="31292" target="31284" cy:directed="1"/>
      <edge id="31294" label="WP_097216730_2 (interacts with) WP_121750537_3" source="31292" target="31282" cy:directed="1"/>
      <edge id="31293" label="WP_097216730_2 (interacts with) WP_055421432_3" source="31292" target="31280" cy:directed="1"/>
      <edge id="31306" label="WP_078077257_2 (interacts with) WP_052479947_4" source="31288" target="31286" cy:directed="1"/>
      <edge id="31305" label="WP_104779873_1 (interacts with) WP_052479947_4" source="31284" target="31286" cy:directed="1"/>
      <edge id="31304" label="WP_104779873_1 (interacts with) WP_078077257_2" source="31284" target="31288" cy:directed="1"/>
      <edge id="31303" label="WP_104779873_1 (interacts with) WP_121750537_3" source="31284" target="31282" cy:directed="1"/>
      <edge id="31302" label="WP_104779873_1 (interacts with) WP_055421432_3" source="31284" target="31280" cy:directed="1"/>
      <edge id="31291" label="WP_121750537_3 (interacts with) WP_052479947_4" source="31282" target="31286" cy:directed="1"/>
      <edge id="31290" label="WP_121750537_3 (interacts with) WP_078077257_2" source="31282" target="31288" cy:directed="1"/>
      <edge id="31301" label="WP_055421432_3 (interacts with) WP_052479947_4" source="31280" target="31286" cy:directed="1"/>
      <edge id="31300" label="WP_055421432_3 (interacts with) WP_078077257_2" source="31280" target="31288" cy:directed="1"/>
      <edge id="31299" label="WP_055421432_3 (interacts with) WP_121750537_3" source="31280" target="31282" cy:directed="1"/>
      <edge id="31289" label="WP_135072443_2 (interacts with) WP_078077257_2" source="31279" target="31288" cy:directed="1"/>
      <edge id="31287" label="WP_135072443_2 (interacts with) WP_052479947_4" source="31279" target="31286" cy:directed="1"/>
      <edge id="31285" label="WP_135072443_2 (interacts with) WP_104779873_1" source="31279" target="31284" cy:directed="1"/>
      <edge id="31283" label="WP_135072443_2 (interacts with) WP_121750537_3" source="31279" target="31282" cy:directed="1"/>
      <edge id="31281" label="WP_135072443_2 (interacts with) WP_055421432_3" source="31279" target="31280" cy:directed="1"/>
      <edge id="31278" label="WP_168645325_3 (interacts with) WP_015078657_3" source="31272" target="31261" cy:directed="1"/>
      <edge id="31277" label="WP_168645325_3 (interacts with) WP_027402982_3" source="31272" target="31254" cy:directed="1"/>
      <edge id="31276" label="WP_168645325_3 (interacts with) WP_148763415_1" source="31272" target="31252" cy:directed="1"/>
      <edge id="31275" label="WP_168645325_3 (interacts with) WP_168465654_2" source="31272" target="31257" cy:directed="1"/>
      <edge id="31274" label="WP_168645325_3 (interacts with) WP_096664869_4" source="31272" target="31251" cy:directed="1"/>
      <edge id="31273" label="WP_168645325_3 (interacts with) OBQ18754_1" source="31272" target="31266" cy:directed="1"/>
      <edge id="31271" label="OBQ18754_1 (interacts with) WP_015078657_3" source="31266" target="31261" cy:directed="1"/>
      <edge id="31270" label="OBQ18754_1 (interacts with) WP_027402982_3" source="31266" target="31254" cy:directed="1"/>
      <edge id="31269" label="OBQ18754_1 (interacts with) WP_148763415_1" source="31266" target="31252" cy:directed="1"/>
      <edge id="31268" label="OBQ18754_1 (interacts with) WP_096664869_4" source="31266" target="31251" cy:directed="1"/>
      <edge id="31267" label="OBQ18754_1 (interacts with) WP_168465654_2" source="31266" target="31257" cy:directed="1"/>
      <edge id="31265" label="WP_015078657_3 (interacts with) WP_027402982_3" source="31261" target="31254" cy:directed="1"/>
      <edge id="31264" label="WP_015078657_3 (interacts with) WP_148763415_1" source="31261" target="31252" cy:directed="1"/>
      <edge id="31263" label="WP_015078657_3 (interacts with) WP_168465654_2" source="31261" target="31257" cy:directed="1"/>
      <edge id="31262" label="WP_015078657_3 (interacts with) WP_096664869_4" source="31261" target="31251" cy:directed="1"/>
      <edge id="31260" label="WP_168465654_2 (interacts with) WP_027402982_3" source="31257" target="31254" cy:directed="1"/>
      <edge id="31259" label="WP_168465654_2 (interacts with) WP_148763415_1" source="31257" target="31252" cy:directed="1"/>
      <edge id="31258" label="WP_168465654_2 (interacts with) WP_096664869_4" source="31257" target="31251" cy:directed="1"/>
      <edge id="31256" label="WP_027402982_3 (interacts with) WP_148763415_1" source="31254" target="31252" cy:directed="1"/>
      <edge id="31255" label="WP_027402982_3 (interacts with) WP_096664869_4" source="31254" target="31251" cy:directed="1"/>
      <edge id="31253" label="WP_096664869_4 (interacts with) WP_148763415_1" source="31251" target="31252" cy:directed="1"/>
      <edge id="31250" label="WP_071383933_7 (interacts with) WP_054237388_8" source="31247" target="31249" cy:directed="1"/>
      <edge id="31248" label="WP_071383933_7 (interacts with) WP_153461219_7" source="31247" target="31242" cy:directed="1"/>
      <edge id="31245" label="WP_153461219_7 (interacts with) WP_153461219_5" source="31242" target="31244" cy:directed="1"/>
      <edge id="31243" label="WP_153461219_7 (interacts with) WP_051708270_3" source="31242" target="31238" cy:directed="1"/>
      <edge id="31246" label="WP_157846946_3 (interacts with) WP_051708270_3" source="31240" target="31238" cy:directed="1"/>
      <edge id="31241" label="WP_053706403_4 (interacts with) WP_157846946_3" source="31237" target="31240" cy:directed="1"/>
      <edge id="31239" label="WP_053706403_4 (interacts with) WP_051708270_3" source="31237" target="31238" cy:directed="1"/>
      <edge id="31236" label="WP_107498105_3 (interacts with) WP_106743417_1" source="31220" target="31216" cy:directed="1"/>
      <edge id="31235" label="WP_107498105_3 (interacts with) WP_162197196_2" source="31220" target="31214" cy:directed="1"/>
      <edge id="31234" label="WP_107498105_3 (interacts with) KQB97104_1" source="31220" target="31209" cy:directed="1"/>
      <edge id="31233" label="WP_107498105_3 (interacts with) WP_106358260_1" source="31220" target="31212" cy:directed="1"/>
      <edge id="31232" label="WP_107498105_3 (interacts with) WP_110278359_1" source="31220" target="31210" cy:directed="1"/>
      <edge id="31225" label="WP_055189764_1 (interacts with) WP_162197196_2" source="31218" target="31214" cy:directed="1"/>
      <edge id="31224" label="WP_055189764_1 (interacts with) WP_106743417_1" source="31218" target="31216" cy:directed="1"/>
      <edge id="31223" label="WP_055189764_1 (interacts with) KQB97104_1" source="31218" target="31209" cy:directed="1"/>
      <edge id="31222" label="WP_055189764_1 (interacts with) WP_106358260_1" source="31218" target="31212" cy:directed="1"/>
      <edge id="31221" label="WP_055189764_1 (interacts with) WP_107498105_3" source="31218" target="31220" cy:directed="1"/>
      <edge id="31219" label="WP_055189764_1 (interacts with) WP_110278359_1" source="31218" target="31210" cy:directed="1"/>
      <edge id="31228" label="WP_106743417_1 (interacts with) WP_106358260_1" source="31216" target="31212" cy:directed="1"/>
      <edge id="31227" label="WP_106743417_1 (interacts with) WP_110278359_1" source="31216" target="31210" cy:directed="1"/>
      <edge id="31231" label="WP_162197196_2 (interacts with) WP_106743417_1" source="31214" target="31216" cy:directed="1"/>
      <edge id="31230" label="WP_162197196_2 (interacts with) WP_106358260_1" source="31214" target="31212" cy:directed="1"/>
      <edge id="31229" label="WP_162197196_2 (interacts with) WP_110278359_1" source="31214" target="31210" cy:directed="1"/>
      <edge id="31226" label="WP_110278359_1 (interacts with) WP_106358260_1" source="31210" target="31212" cy:directed="1"/>
      <edge id="31217" label="KQB97104_1 (interacts with) WP_106743417_1" source="31209" target="31216" cy:directed="1"/>
      <edge id="31215" label="KQB97104_1 (interacts with) WP_162197196_2" source="31209" target="31214" cy:directed="1"/>
      <edge id="31213" label="KQB97104_1 (interacts with) WP_106358260_1" source="31209" target="31212" cy:directed="1"/>
      <edge id="31211" label="KQB97104_1 (interacts with) WP_110278359_1" source="31209" target="31210" cy:directed="1"/>
      <edge id="31205" label="WP_155862233_6 (interacts with) WP_068028504_3" source="31203" target="31187" cy:directed="1"/>
      <edge id="31204" label="WP_155862233_6 (interacts with) WP_084520237_3" source="31203" target="31183" cy:directed="1"/>
      <edge id="31202" label="WP_092602219_1 (interacts with) WP_008380405_3" source="31197" target="31189" cy:directed="1"/>
      <edge id="31201" label="WP_092602219_1 (interacts with) WP_068028504_3" source="31197" target="31187" cy:directed="1"/>
      <edge id="31200" label="WP_092602219_1 (interacts with) WP_153321593_2" source="31197" target="31180" cy:directed="1"/>
      <edge id="31199" label="WP_092602219_1 (interacts with) WP_084520237_3" source="31197" target="31183" cy:directed="1"/>
      <edge id="31198" label="WP_092602219_1 (interacts with) WP_122818055_3" source="31197" target="31181" cy:directed="1"/>
      <edge id="31206" label="WP_008380405_3 (interacts with) WP_068028504_3" source="31189" target="31187" cy:directed="1"/>
      <edge id="31196" label="WP_115965582_1 (interacts with) WP_068028504_3" source="31185" target="31187" cy:directed="1"/>
      <edge id="31195" label="WP_115965582_1 (interacts with) WP_008380405_3" source="31185" target="31189" cy:directed="1"/>
      <edge id="31194" label="WP_115965582_1 (interacts with) WP_084520237_3" source="31185" target="31183" cy:directed="1"/>
      <edge id="31193" label="WP_084520237_3 (interacts with) WP_068028504_3" source="31183" target="31187" cy:directed="1"/>
      <edge id="31192" label="WP_084520237_3 (interacts with) WP_008380405_3" source="31183" target="31189" cy:directed="1"/>
      <edge id="31191" label="WP_084520237_3 (interacts with) WP_122818055_3" source="31183" target="31181" cy:directed="1"/>
      <edge id="31208" label="WP_122818055_3 (interacts with) WP_008380405_3" source="31181" target="31189" cy:directed="1"/>
      <edge id="31207" label="WP_122818055_3 (interacts with) WP_068028504_3" source="31181" target="31187" cy:directed="1"/>
      <edge id="31190" label="WP_153321593_2 (interacts with) WP_008380405_3" source="31180" target="31189" cy:directed="1"/>
      <edge id="31188" label="WP_153321593_2 (interacts with) WP_068028504_3" source="31180" target="31187" cy:directed="1"/>
      <edge id="31186" label="WP_153321593_2 (interacts with) WP_115965582_1" source="31180" target="31185" cy:directed="1"/>
      <edge id="31184" label="WP_153321593_2 (interacts with) WP_084520237_3" source="31180" target="31183" cy:directed="1"/>
      <edge id="31182" label="WP_153321593_2 (interacts with) WP_122818055_3" source="31180" target="31181" cy:directed="1"/>
      <edge id="31176" label="WP_015078657_9 (interacts with) WP_148763415_6" source="31168" target="31135" cy:directed="1"/>
      <edge id="31175" label="WP_015078657_9 (interacts with) WP_137906310_4" source="31168" target="31142" cy:directed="1"/>
      <edge id="31174" label="WP_015078657_9 (interacts with) WP_168465654_6" source="31168" target="31160" cy:directed="1"/>
      <edge id="31173" label="WP_015078657_9 (interacts with) WP_096664869_7" source="31168" target="31153" cy:directed="1"/>
      <edge id="31172" label="WP_015078657_9 (interacts with) OBQ36138_2" source="31168" target="31136" cy:directed="1"/>
      <edge id="31171" label="WP_015078657_9 (interacts with) WP_168357543_3" source="31168" target="31139" cy:directed="1"/>
      <edge id="31170" label="WP_015078657_9 (interacts with) WP_168645325_6" source="31168" target="31147" cy:directed="1"/>
      <edge id="31169" label="WP_015078657_9 (interacts with) OBQ18754_4" source="31168" target="31138" cy:directed="1"/>
      <edge id="31167" label="WP_168465654_6 (interacts with) WP_148763415_6" source="31160" target="31135" cy:directed="1"/>
      <edge id="31166" label="WP_168465654_6 (interacts with) WP_137906310_4" source="31160" target="31142" cy:directed="1"/>
      <edge id="31165" label="WP_168465654_6 (interacts with) WP_096664869_7" source="31160" target="31153" cy:directed="1"/>
      <edge id="31164" label="WP_168465654_6 (interacts with) OBQ36138_2" source="31160" target="31136" cy:directed="1"/>
      <edge id="31163" label="WP_168465654_6 (interacts with) WP_168357543_3" source="31160" target="31139" cy:directed="1"/>
      <edge id="31162" label="WP_168465654_6 (interacts with) WP_168645325_6" source="31160" target="31147" cy:directed="1"/>
      <edge id="31161" label="WP_168465654_6 (interacts with) OBQ18754_4" source="31160" target="31138" cy:directed="1"/>
      <edge id="31159" label="WP_096664869_7 (interacts with) WP_148763415_6" source="31153" target="31135" cy:directed="1"/>
      <edge id="31158" label="WP_096664869_7 (interacts with) WP_137906310_4" source="31153" target="31142" cy:directed="1"/>
      <edge id="31157" label="WP_096664869_7 (interacts with) OBQ36138_2" source="31153" target="31136" cy:directed="1"/>
      <edge id="31156" label="WP_096664869_7 (interacts with) WP_168357543_3" source="31153" target="31139" cy:directed="1"/>
      <edge id="31155" label="WP_096664869_7 (interacts with) WP_168645325_6" source="31153" target="31147" cy:directed="1"/>
      <edge id="31154" label="WP_096664869_7 (interacts with) OBQ18754_4" source="31153" target="31138" cy:directed="1"/>
      <edge id="31152" label="WP_168645325_6 (interacts with) WP_148763415_6" source="31147" target="31135" cy:directed="1"/>
      <edge id="31151" label="WP_168645325_6 (interacts with) WP_137906310_4" source="31147" target="31142" cy:directed="1"/>
      <edge id="31150" label="WP_168645325_6 (interacts with) OBQ36138_2" source="31147" target="31136" cy:directed="1"/>
      <edge id="31149" label="WP_168645325_6 (interacts with) WP_168357543_3" source="31147" target="31139" cy:directed="1"/>
      <edge id="31148" label="WP_168645325_6 (interacts with) OBQ18754_4" source="31147" target="31138" cy:directed="1"/>
      <edge id="31179" label="WP_137906310_4 (interacts with) WP_148763415_6" source="31142" target="31135" cy:directed="1"/>
      <edge id="31178" label="WP_137906310_4 (interacts with) OBQ36138_2" source="31142" target="31136" cy:directed="1"/>
      <edge id="31177" label="WP_137906310_4 (interacts with) WP_168357543_3" source="31142" target="31139" cy:directed="1"/>
      <edge id="31146" label="WP_168357543_3 (interacts with) WP_148763415_6" source="31139" target="31135" cy:directed="1"/>
      <edge id="31145" label="WP_168357543_3 (interacts with) OBQ36138_2" source="31139" target="31136" cy:directed="1"/>
      <edge id="31144" label="OBQ18754_4 (interacts with) WP_148763415_6" source="31138" target="31135" cy:directed="1"/>
      <edge id="31143" label="OBQ18754_4 (interacts with) WP_137906310_4" source="31138" target="31142" cy:directed="1"/>
      <edge id="31141" label="OBQ18754_4 (interacts with) OBQ36138_2" source="31138" target="31136" cy:directed="1"/>
      <edge id="31140" label="OBQ18754_4 (interacts with) WP_168357543_3" source="31138" target="31139" cy:directed="1"/>
      <edge id="31137" label="WP_148763415_6 (interacts with) OBQ36138_2" source="31135" target="31136" cy:directed="1"/>
      <edge id="31130" label="WP_137248807_1 (interacts with) WP_145982885_1" source="31122" target="31101" cy:directed="1"/>
      <edge id="31129" label="WP_137248807_1 (interacts with) WP_062437448_1" source="31122" target="31099" cy:directed="1"/>
      <edge id="31128" label="WP_137248807_1 (interacts with) WP_030452416_1" source="31122" target="31097" cy:directed="1"/>
      <edge id="31127" label="WP_137248807_1 (interacts with) CNF13542_4" source="31122" target="31114" cy:directed="1"/>
      <edge id="31126" label="WP_137248807_1 (interacts with) WP_161483240_1" source="31122" target="31103" cy:directed="1"/>
      <edge id="31125" label="WP_137248807_1 (interacts with) WP_062348671_1" source="31122" target="31095" cy:directed="1"/>
      <edge id="31124" label="WP_137248807_1 (interacts with) PZN45587_2" source="31122" target="31092" cy:directed="1"/>
      <edge id="31123" label="WP_137248807_1 (interacts with) WP_131969051_1" source="31122" target="31093" cy:directed="1"/>
      <edge id="31120" label="CNF13542_4 (interacts with) WP_062437448_1" source="31114" target="31099" cy:directed="1"/>
      <edge id="31119" label="CNF13542_4 (interacts with) WP_030452416_1" source="31114" target="31097" cy:directed="1"/>
      <edge id="31118" label="CNF13542_4 (interacts with) WP_161483240_1" source="31114" target="31103" cy:directed="1"/>
      <edge id="31117" label="CNF13542_4 (interacts with) WP_062348671_1" source="31114" target="31095" cy:directed="1"/>
      <edge id="31116" label="CNF13542_4 (interacts with) WP_131969051_1" source="31114" target="31093" cy:directed="1"/>
      <edge id="31115" label="CNF13542_4 (interacts with) PZN45587_2" source="31114" target="31092" cy:directed="1"/>
      <edge id="31109" label="WP_161483240_1 (interacts with) WP_145982885_1" source="31103" target="31101" cy:directed="1"/>
      <edge id="31108" label="WP_161483240_1 (interacts with) WP_062437448_1" source="31103" target="31099" cy:directed="1"/>
      <edge id="31107" label="WP_161483240_1 (interacts with) WP_030452416_1" source="31103" target="31097" cy:directed="1"/>
      <edge id="31106" label="WP_161483240_1 (interacts with) WP_062348671_1" source="31103" target="31095" cy:directed="1"/>
      <edge id="31105" label="WP_161483240_1 (interacts with) PZN45587_2" source="31103" target="31092" cy:directed="1"/>
      <edge id="31104" label="WP_161483240_1 (interacts with) WP_131969051_1" source="31103" target="31093" cy:directed="1"/>
      <edge id="31113" label="WP_145982885_1 (interacts with) WP_030452416_1" source="31101" target="31097" cy:directed="1"/>
      <edge id="31112" label="WP_145982885_1 (interacts with) WP_062348671_1" source="31101" target="31095" cy:directed="1"/>
      <edge id="31134" label="WP_062437448_1 (interacts with) WP_145982885_1" source="31099" target="31101" cy:directed="1"/>
      <edge id="31133" label="WP_062437448_1 (interacts with) WP_030452416_1" source="31099" target="31097" cy:directed="1"/>
      <edge id="31132" label="WP_062437448_1 (interacts with) WP_062348671_1" source="31099" target="31095" cy:directed="1"/>
      <edge id="31131" label="WP_062437448_1 (interacts with) WP_131969051_1" source="31099" target="31093" cy:directed="1"/>
      <edge id="31111" label="WP_030452416_1 (interacts with) WP_062348671_1" source="31097" target="31095" cy:directed="1"/>
      <edge id="31110" label="WP_030452416_1 (interacts with) WP_131969051_1" source="31097" target="31093" cy:directed="1"/>
      <edge id="31121" label="WP_062348671_1 (interacts with) WP_131969051_1" source="31095" target="31093" cy:directed="1"/>
      <edge id="31102" label="PZN45587_2 (interacts with) WP_145982885_1" source="31092" target="31101" cy:directed="1"/>
      <edge id="31100" label="PZN45587_2 (interacts with) WP_062437448_1" source="31092" target="31099" cy:directed="1"/>
      <edge id="31098" label="PZN45587_2 (interacts with) WP_030452416_1" source="31092" target="31097" cy:directed="1"/>
      <edge id="31096" label="PZN45587_2 (interacts with) WP_062348671_1" source="31092" target="31095" cy:directed="1"/>
      <edge id="31094" label="PZN45587_2 (interacts with) WP_131969051_1" source="31092" target="31093" cy:directed="1"/>
      <edge id="31083" label="WP_166841243_3 (interacts with) WP_142936832_3" source="31075" target="31058" cy:directed="1"/>
      <edge id="31082" label="WP_166841243_3 (interacts with) WP_168688294_1" source="31075" target="31046" cy:directed="1"/>
      <edge id="31081" label="WP_166841243_3 (interacts with) WP_096285992_4" source="31075" target="31052" cy:directed="1"/>
      <edge id="31080" label="WP_166841243_3 (interacts with) AFR27446_3" source="31075" target="31038" cy:directed="1"/>
      <edge id="31079" label="WP_166841243_3 (interacts with) WP_061955677_5" source="31075" target="31040" cy:directed="1"/>
      <edge id="31078" label="WP_166841243_3 (interacts with) WP_091465037_3" source="31075" target="31035" cy:directed="1"/>
      <edge id="31077" label="WP_166841243_3 (interacts with) WP_062071413_3" source="31075" target="31036" cy:directed="1"/>
      <edge id="31076" label="WP_166841243_3 (interacts with) WP_141366901_2" source="31075" target="31065" cy:directed="1"/>
      <edge id="31091" label="WP_131089594_5 (interacts with) WP_142936832_3" source="31068" target="31058" cy:directed="1"/>
      <edge id="31090" label="WP_131089594_5 (interacts with) WP_096285992_4" source="31068" target="31052" cy:directed="1"/>
      <edge id="31089" label="WP_131089594_5 (interacts with) WP_166841243_3" source="31068" target="31075" cy:directed="1"/>
      <edge id="31088" label="WP_131089594_5 (interacts with) WP_061955677_5" source="31068" target="31040" cy:directed="1"/>
      <edge id="31087" label="WP_131089594_5 (interacts with) AFR27446_3" source="31068" target="31038" cy:directed="1"/>
      <edge id="31086" label="WP_131089594_5 (interacts with) WP_104291723_5" source="31068" target="31043" cy:directed="1"/>
      <edge id="31085" label="WP_131089594_5 (interacts with) WP_091465037_3" source="31068" target="31035" cy:directed="1"/>
      <edge id="31084" label="WP_131089594_5 (interacts with) WP_062071413_3" source="31068" target="31036" cy:directed="1"/>
      <edge id="31073" label="WP_141366901_2 (interacts with) WP_061955677_5" source="31065" target="31040" cy:directed="1"/>
      <edge id="31072" label="WP_141366901_2 (interacts with) AFR27446_3" source="31065" target="31038" cy:directed="1"/>
      <edge id="31071" label="WP_141366901_2 (interacts with) WP_142936832_3" source="31065" target="31058" cy:directed="1"/>
      <edge id="31070" label="WP_141366901_2 (interacts with) WP_096285992_4" source="31065" target="31052" cy:directed="1"/>
      <edge id="31069" label="WP_141366901_2 (interacts with) WP_131089594_5" source="31065" target="31068" cy:directed="1"/>
      <edge id="31067" label="WP_141366901_2 (interacts with) WP_091465037_3" source="31065" target="31035" cy:directed="1"/>
      <edge id="31066" label="WP_141366901_2 (interacts with) WP_062071413_3" source="31065" target="31036" cy:directed="1"/>
      <edge id="31064" label="WP_142936832_3 (interacts with) WP_168688294_1" source="31058" target="31046" cy:directed="1"/>
      <edge id="31063" label="WP_142936832_3 (interacts with) WP_096285992_4" source="31058" target="31052" cy:directed="1"/>
      <edge id="31062" label="WP_142936832_3 (interacts with) AFR27446_3" source="31058" target="31038" cy:directed="1"/>
      <edge id="31061" label="WP_142936832_3 (interacts with) WP_061955677_5" source="31058" target="31040" cy:directed="1"/>
      <edge id="31060" label="WP_142936832_3 (interacts with) WP_091465037_3" source="31058" target="31035" cy:directed="1"/>
      <edge id="31059" label="WP_142936832_3 (interacts with) WP_062071413_3" source="31058" target="31036" cy:directed="1"/>
      <edge id="31057" label="WP_096285992_4 (interacts with) WP_061955677_5" source="31052" target="31040" cy:directed="1"/>
      <edge id="31056" label="WP_096285992_4 (interacts with) AFR27446_3" source="31052" target="31038" cy:directed="1"/>
      <edge id="31055" label="WP_096285992_4 (interacts with) WP_091465037_3" source="31052" target="31035" cy:directed="1"/>
      <edge id="31054" label="WP_096285992_4 (interacts with) WP_062071413_3" source="31052" target="31036" cy:directed="1"/>
      <edge id="31053" label="WP_168688294_1 (interacts with) WP_096285992_4" source="31046" target="31052" cy:directed="1"/>
      <edge id="31051" label="WP_168688294_1 (interacts with) AFR27446_3" source="31046" target="31038" cy:directed="1"/>
      <edge id="31050" label="WP_168688294_1 (interacts with) WP_061955677_5" source="31046" target="31040" cy:directed="1"/>
      <edge id="31049" label="WP_168688294_1 (interacts with) WP_104291723_5" source="31046" target="31043" cy:directed="1"/>
      <edge id="31048" label="WP_168688294_1 (interacts with) WP_091465037_3" source="31046" target="31035" cy:directed="1"/>
      <edge id="31047" label="WP_168688294_1 (interacts with) WP_062071413_3" source="31046" target="31036" cy:directed="1"/>
      <edge id="31045" label="WP_061955677_5 (interacts with) AFR27446_3" source="31040" target="31038" cy:directed="1"/>
      <edge id="31044" label="WP_061955677_5 (interacts with) WP_104291723_5" source="31040" target="31043" cy:directed="1"/>
      <edge id="31042" label="WP_061955677_5 (interacts with) WP_091465037_3" source="31040" target="31035" cy:directed="1"/>
      <edge id="31041" label="WP_061955677_5 (interacts with) WP_062071413_3" source="31040" target="31036" cy:directed="1"/>
      <edge id="31074" label="WP_062071413_3 (interacts with) AFR27446_3" source="31036" target="31038" cy:directed="1"/>
      <edge id="31039" label="WP_091465037_3 (interacts with) AFR27446_3" source="31035" target="31038" cy:directed="1"/>
      <edge id="31037" label="WP_091465037_3 (interacts with) WP_062071413_3" source="31035" target="31036" cy:directed="1"/>
      <edge id="31025" label="WP_097866484_4 (interacts with) WP_124271963_3" source="31017" target="30998" cy:directed="1"/>
      <edge id="31024" label="WP_097866484_4 (interacts with) WP_051840194_4" source="31017" target="31011" cy:directed="1"/>
      <edge id="31023" label="WP_097866484_4 (interacts with) WP_107115831_4" source="31017" target="30996" cy:directed="1"/>
      <edge id="31022" label="WP_097866484_4 (interacts with) WP_018960901_3" source="31017" target="30994" cy:directed="1"/>
      <edge id="31021" label="WP_097866484_4 (interacts with) WP_096622718_2" source="31017" target="30992" cy:directed="1"/>
      <edge id="31020" label="WP_097866484_4 (interacts with) WP_044377254_2" source="31017" target="30991" cy:directed="1"/>
      <edge id="31019" label="WP_097866484_4 (interacts with) WP_126393842_3" source="31017" target="31000" cy:directed="1"/>
      <edge id="31018" label="WP_097866484_4 (interacts with) WP_120754718_5" source="31017" target="31004" cy:directed="1"/>
      <edge id="31016" label="WP_058047489_3 (interacts with) WP_124271963_3" source="31008" target="30998" cy:directed="1"/>
      <edge id="31015" label="WP_058047489_3 (interacts with) WP_051840194_4" source="31008" target="31011" cy:directed="1"/>
      <edge id="31014" label="WP_058047489_3 (interacts with) WP_031017311_4" source="31008" target="31001" cy:directed="1"/>
      <edge id="31013" label="WP_058047489_3 (interacts with) WP_126393842_3" source="31008" target="31000" cy:directed="1"/>
      <edge id="31028" label="WP_141310912_3 (interacts with) WP_031017311_4" source="31005" target="31001" cy:directed="1"/>
      <edge id="31027" label="WP_141310912_3 (interacts with) WP_058047489_3" source="31005" target="31008" cy:directed="1"/>
      <edge id="31026" label="WP_141310912_3 (interacts with) WP_126393842_3" source="31005" target="31000" cy:directed="1"/>
      <edge id="31012" label="WP_120754718_5 (interacts with) WP_051840194_4" source="31004" target="31011" cy:directed="1"/>
      <edge id="31010" label="WP_120754718_5 (interacts with) WP_031017311_4" source="31004" target="31001" cy:directed="1"/>
      <edge id="31009" label="WP_120754718_5 (interacts with) WP_058047489_3" source="31004" target="31008" cy:directed="1"/>
      <edge id="31007" label="WP_120754718_5 (interacts with) WP_126393842_3" source="31004" target="31000" cy:directed="1"/>
      <edge id="31006" label="WP_120754718_5 (interacts with) WP_141310912_3" source="31004" target="31005" cy:directed="1"/>
      <edge id="31002" label="WP_126393842_3 (interacts with) WP_031017311_4" source="31000" target="31001" cy:directed="1"/>
      <edge id="31003" label="WP_124271963_3 (interacts with) WP_096622718_2" source="30998" target="30992" cy:directed="1"/>
      <edge id="31034" label="WP_107115831_4 (interacts with) WP_124271963_3" source="30996" target="30998" cy:directed="1"/>
      <edge id="31033" label="WP_107115831_4 (interacts with) WP_018960901_3" source="30996" target="30994" cy:directed="1"/>
      <edge id="31032" label="WP_107115831_4 (interacts with) WP_096622718_2" source="30996" target="30992" cy:directed="1"/>
      <edge id="31031" label="WP_018960901_3 (interacts with) WP_124271963_3" source="30994" target="30998" cy:directed="1"/>
      <edge id="31030" label="WP_018960901_3 (interacts with) WP_051840194_4" source="30994" target="31011" cy:directed="1"/>
      <edge id="31029" label="WP_018960901_3 (interacts with) WP_096622718_2" source="30994" target="30992" cy:directed="1"/>
      <edge id="30999" label="WP_044377254_2 (interacts with) WP_124271963_3" source="30991" target="30998" cy:directed="1"/>
      <edge id="30997" label="WP_044377254_2 (interacts with) WP_107115831_4" source="30991" target="30996" cy:directed="1"/>
      <edge id="30995" label="WP_044377254_2 (interacts with) WP_018960901_3" source="30991" target="30994" cy:directed="1"/>
      <edge id="30993" label="WP_044377254_2 (interacts with) WP_096622718_2" source="30991" target="30992" cy:directed="1"/>
      <edge id="30954" label="WP_052479947_3 (interacts with) GFH39519_2" source="30945" target="30926" cy:directed="1"/>
      <edge id="30953" label="WP_052479947_3 (interacts with) WP_097216730_1" source="30945" target="30931" cy:directed="1"/>
      <edge id="30952" label="WP_052479947_3 (interacts with) WP_121750537_1" source="30945" target="30933" cy:directed="1"/>
      <edge id="30951" label="WP_052479947_3 (interacts with) WP_051727186_2" source="30945" target="30929" cy:directed="1"/>
      <edge id="30950" label="WP_052479947_3 (interacts with) WP_104779873_2" source="30945" target="30927" cy:directed="1"/>
      <edge id="30963" label="WP_055421432_2 (interacts with) GFH39519_2" source="30942" target="30926" cy:directed="1"/>
      <edge id="30962" label="WP_055421432_2 (interacts with) WP_097216730_1" source="30942" target="30931" cy:directed="1"/>
      <edge id="30961" label="WP_055421432_2 (interacts with) WP_121750537_1" source="30942" target="30933" cy:directed="1"/>
      <edge id="30960" label="WP_055421432_2 (interacts with) WP_052479947_3" source="30942" target="30945" cy:directed="1"/>
      <edge id="30959" label="WP_055421432_2 (interacts with) WP_051727186_2" source="30942" target="30929" cy:directed="1"/>
      <edge id="30958" label="WP_055421432_2 (interacts with) WP_135072443_1" source="30942" target="30940" cy:directed="1"/>
      <edge id="30957" label="WP_055421432_2 (interacts with) WP_104779873_2" source="30942" target="30927" cy:directed="1"/>
      <edge id="30949" label="WP_135072443_1 (interacts with) GFH39519_2" source="30940" target="30926" cy:directed="1"/>
      <edge id="30948" label="WP_135072443_1 (interacts with) WP_097216730_1" source="30940" target="30931" cy:directed="1"/>
      <edge id="30947" label="WP_135072443_1 (interacts with) WP_121750537_1" source="30940" target="30933" cy:directed="1"/>
      <edge id="30946" label="WP_135072443_1 (interacts with) WP_052479947_3" source="30940" target="30945" cy:directed="1"/>
      <edge id="30944" label="WP_135072443_1 (interacts with) WP_051727186_2" source="30940" target="30929" cy:directed="1"/>
      <edge id="30988" label="WP_078077257_1 (interacts with) WP_135072443_1" source="30938" target="30940" cy:directed="1"/>
      <edge id="30987" label="WP_078077257_1 (interacts with) WP_055421432_2" source="30938" target="30942" cy:directed="1"/>
      <edge id="30986" label="WP_078077257_1 (interacts with) WP_104779873_2" source="30938" target="30927" cy:directed="1"/>
      <edge id="30985" label="WP_078077257_1 (interacts with) GFH39519_2" source="30938" target="30926" cy:directed="1"/>
      <edge id="30984" label="WP_078077257_1 (interacts with) WP_121750537_1" source="30938" target="30933" cy:directed="1"/>
      <edge id="30983" label="WP_078077257_1 (interacts with) WP_107501676_2" source="30938" target="30936" cy:directed="1"/>
      <edge id="30982" label="WP_078077257_1 (interacts with) WP_097216730_1" source="30938" target="30931" cy:directed="1"/>
      <edge id="30981" label="WP_078077257_1 (interacts with) WP_052479947_3" source="30938" target="30945" cy:directed="1"/>
      <edge id="30980" label="WP_078077257_1 (interacts with) WP_051727186_2" source="30938" target="30929" cy:directed="1"/>
      <edge id="30979" label="WP_107501676_2 (interacts with) WP_055421432_2" source="30936" target="30942" cy:directed="1"/>
      <edge id="30978" label="WP_107501676_2 (interacts with) GFH39519_2" source="30936" target="30926" cy:directed="1"/>
      <edge id="30977" label="WP_107501676_2 (interacts with) WP_097216730_1" source="30936" target="30931" cy:directed="1"/>
      <edge id="30976" label="WP_107501676_2 (interacts with) WP_121750537_1" source="30936" target="30933" cy:directed="1"/>
      <edge id="30975" label="WP_107501676_2 (interacts with) WP_052479947_3" source="30936" target="30945" cy:directed="1"/>
      <edge id="30974" label="WP_107501676_2 (interacts with) WP_051727186_2" source="30936" target="30929" cy:directed="1"/>
      <edge id="30973" label="WP_107501676_2 (interacts with) WP_135072443_1" source="30936" target="30940" cy:directed="1"/>
      <edge id="30972" label="WP_107501676_2 (interacts with) PIR21572_1" source="30936" target="30955" cy:directed="1"/>
      <edge id="30971" label="WP_107501676_2 (interacts with) WP_104779873_2" source="30936" target="30927" cy:directed="1"/>
      <edge id="30943" label="WP_141754588_2 (interacts with) WP_055421432_2" source="30935" target="30942" cy:directed="1"/>
      <edge id="30941" label="WP_141754588_2 (interacts with) WP_135072443_1" source="30935" target="30940" cy:directed="1"/>
      <edge id="30939" label="WP_141754588_2 (interacts with) WP_078077257_1" source="30935" target="30938" cy:directed="1"/>
      <edge id="30937" label="WP_141754588_2 (interacts with) WP_107501676_2" source="30935" target="30936" cy:directed="1"/>
      <edge id="30965" label="WP_121750537_1 (interacts with) WP_097216730_1" source="30933" target="30931" cy:directed="1"/>
      <edge id="30964" label="WP_121750537_1 (interacts with) PIR21572_1" source="30933" target="30955" cy:directed="1"/>
      <edge id="30956" label="WP_097216730_1 (interacts with) PIR21572_1" source="30931" target="30955" cy:directed="1"/>
      <edge id="30990" label="WP_051727186_2 (interacts with) WP_097216730_1" source="30929" target="30931" cy:directed="1"/>
      <edge id="30989" label="WP_051727186_2 (interacts with) WP_121750537_1" source="30929" target="30933" cy:directed="1"/>
      <edge id="30970" label="WP_104779873_2 (interacts with) WP_097216730_1" source="30927" target="30931" cy:directed="1"/>
      <edge id="30969" label="WP_104779873_2 (interacts with) WP_121750537_1" source="30927" target="30933" cy:directed="1"/>
      <edge id="30968" label="WP_104779873_2 (interacts with) WP_051727186_2" source="30927" target="30929" cy:directed="1"/>
      <edge id="30967" label="WP_104779873_2 (interacts with) WP_135072443_1" source="30927" target="30940" cy:directed="1"/>
      <edge id="30966" label="WP_104779873_2 (interacts with) PIR21572_1" source="30927" target="30955" cy:directed="1"/>
      <edge id="30934" label="GFH39519_2 (interacts with) WP_121750537_1" source="30926" target="30933" cy:directed="1"/>
      <edge id="30932" label="GFH39519_2 (interacts with) WP_097216730_1" source="30926" target="30931" cy:directed="1"/>
      <edge id="30930" label="GFH39519_2 (interacts with) WP_051727186_2" source="30926" target="30929" cy:directed="1"/>
      <edge id="30928" label="GFH39519_2 (interacts with) WP_104779873_2" source="30926" target="30927" cy:directed="1"/>
      <edge id="30925" label="WP_139627778_1 (interacts with) WP_128433866_1" source="30918" target="30882" cy:directed="1"/>
      <edge id="30924" label="WP_139627778_1 (interacts with) WP_109497443_4" source="30918" target="30888" cy:directed="1"/>
      <edge id="30923" label="WP_139627778_1 (interacts with) WP_083744359_1" source="30918" target="30894" cy:directed="1"/>
      <edge id="30922" label="WP_139627778_1 (interacts with) WP_051851944_1" source="30918" target="30886" cy:directed="1"/>
      <edge id="30921" label="WP_139627778_1 (interacts with) WP_136238412_1" source="30918" target="30884" cy:directed="1"/>
      <edge id="30920" label="WP_139627778_1 (interacts with) WP_133890759_5" source="30918" target="30879" cy:directed="1"/>
      <edge id="30919" label="WP_139627778_1 (interacts with) WP_053560627_1" source="30918" target="30880" cy:directed="1"/>
      <edge id="30917" label="WP_015659226_5 (interacts with) WP_060892878_6" source="30914" target="30900" cy:directed="1"/>
      <edge id="30916" label="WP_015659226_5 (interacts with) WP_083744359_1" source="30914" target="30894" cy:directed="1"/>
      <edge id="30915" label="WP_015659226_5 (interacts with) WP_051851944_1" source="30914" target="30886" cy:directed="1"/>
      <edge id="30911" label="WP_164312175_5 (interacts with) WP_051851944_1" source="30902" target="30886" cy:directed="1"/>
      <edge id="30910" label="WP_164312175_5 (interacts with) WP_136238412_1" source="30902" target="30884" cy:directed="1"/>
      <edge id="30909" label="WP_164312175_5 (interacts with) WP_133890759_5" source="30902" target="30879" cy:directed="1"/>
      <edge id="30908" label="WP_164312175_5 (interacts with) WP_128433866_1" source="30902" target="30882" cy:directed="1"/>
      <edge id="30907" label="WP_164312175_5 (interacts with) WP_109497443_4" source="30902" target="30888" cy:directed="1"/>
      <edge id="30906" label="WP_164312175_5 (interacts with) WP_083744359_1" source="30902" target="30894" cy:directed="1"/>
      <edge id="30905" label="WP_164312175_5 (interacts with) WP_053560627_1" source="30902" target="30880" cy:directed="1"/>
      <edge id="30904" label="WP_164312175_5 (interacts with) WP_042407705_1" source="30902" target="30903" cy:directed="1"/>
      <edge id="30901" label="WP_083744359_1 (interacts with) WP_060892878_6" source="30894" target="30900" cy:directed="1"/>
      <edge id="30899" label="WP_083744359_1 (interacts with) WP_051851944_1" source="30894" target="30886" cy:directed="1"/>
      <edge id="30898" label="WP_083744359_1 (interacts with) WP_136238412_1" source="30894" target="30884" cy:directed="1"/>
      <edge id="30897" label="WP_083744359_1 (interacts with) WP_128433866_1" source="30894" target="30882" cy:directed="1"/>
      <edge id="30896" label="WP_083744359_1 (interacts with) WP_109497443_4" source="30894" target="30888" cy:directed="1"/>
      <edge id="30895" label="WP_083744359_1 (interacts with) WP_053560627_1" source="30894" target="30880" cy:directed="1"/>
      <edge id="30892" label="WP_109497443_4 (interacts with) WP_128433866_1" source="30888" target="30882" cy:directed="1"/>
      <edge id="30891" label="WP_109497443_4 (interacts with) WP_051851944_1" source="30888" target="30886" cy:directed="1"/>
      <edge id="30890" label="WP_109497443_4 (interacts with) WP_136238412_1" source="30888" target="30884" cy:directed="1"/>
      <edge id="30889" label="WP_109497443_4 (interacts with) WP_053560627_1" source="30888" target="30880" cy:directed="1"/>
      <edge id="30913" label="WP_051851944_1 (interacts with) WP_136238412_1" source="30886" target="30884" cy:directed="1"/>
      <edge id="30912" label="WP_051851944_1 (interacts with) WP_053560627_1" source="30886" target="30880" cy:directed="1"/>
      <edge id="30887" label="WP_128433866_1 (interacts with) WP_051851944_1" source="30882" target="30886" cy:directed="1"/>
      <edge id="30885" label="WP_128433866_1 (interacts with) WP_136238412_1" source="30882" target="30884" cy:directed="1"/>
      <edge id="30883" label="WP_128433866_1 (interacts with) WP_053560627_1" source="30882" target="30880" cy:directed="1"/>
      <edge id="30893" label="WP_053560627_1 (interacts with) WP_136238412_1" source="30880" target="30884" cy:directed="1"/>
      <edge id="30881" label="WP_133890759_5 (interacts with) WP_053560627_1" source="30879" target="30880" cy:directed="1"/>
      <edge id="30869" label="WP_054237388_2 (interacts with) WP_016570561_3" source="30859" target="30833" cy:directed="1"/>
      <edge id="30868" label="WP_054237388_2 (interacts with) WP_164312175_1" source="30859" target="30831" cy:directed="1"/>
      <edge id="30867" label="WP_054237388_2 (interacts with) WP_052856102_1" source="30859" target="30841" cy:directed="1"/>
      <edge id="30866" label="WP_054237388_2 (interacts with) WP_060892878_2" source="30859" target="30820" cy:directed="1"/>
      <edge id="30865" label="WP_054237388_2 (interacts with) WP_015659226_1" source="30859" target="30829" cy:directed="1"/>
      <edge id="30864" label="WP_054237388_2 (interacts with) WP_079181075_3" source="30859" target="30827" cy:directed="1"/>
      <edge id="30863" label="WP_054237388_2 (interacts with) WP_133890759_1" source="30859" target="30825" cy:directed="1"/>
      <edge id="30862" label="WP_054237388_2 (interacts with) WP_071383933_4" source="30859" target="30851" cy:directed="1"/>
      <edge id="30861" label="WP_054237388_2 (interacts with) WP_104258544_3" source="30859" target="30823" cy:directed="1"/>
      <edge id="30860" label="WP_054237388_2 (interacts with) WP_141720451_4" source="30859" target="30821" cy:directed="1"/>
      <edge id="30856" label="WP_071383933_4 (interacts with) WP_164312175_1" source="30851" target="30831" cy:directed="1"/>
      <edge id="30855" label="WP_071383933_4 (interacts with) WP_141720451_4" source="30851" target="30821" cy:directed="1"/>
      <edge id="30854" label="WP_071383933_4 (interacts with) WP_060892878_2" source="30851" target="30820" cy:directed="1"/>
      <edge id="30853" label="WP_071383933_4 (interacts with) WP_015659226_1" source="30851" target="30829" cy:directed="1"/>
      <edge id="30852" label="WP_071383933_4 (interacts with) WP_133890759_1" source="30851" target="30825" cy:directed="1"/>
      <edge id="30850" label="WP_052856102_1 (interacts with) WP_016570561_3" source="30841" target="30833" cy:directed="1"/>
      <edge id="30849" label="WP_052856102_1 (interacts with) WP_104258544_3" source="30841" target="30823" cy:directed="1"/>
      <edge id="30848" label="WP_052856102_1 (interacts with) WP_164312175_1" source="30841" target="30831" cy:directed="1"/>
      <edge id="30847" label="WP_052856102_1 (interacts with) WP_060892878_2" source="30841" target="30820" cy:directed="1"/>
      <edge id="30846" label="WP_052856102_1 (interacts with) WP_079181075_3" source="30841" target="30827" cy:directed="1"/>
      <edge id="30873" label="WP_106115031_2 (interacts with) WP_016570561_3" source="30835" target="30833" cy:directed="1"/>
      <edge id="30872" label="WP_106115031_2 (interacts with) WP_104258544_3" source="30835" target="30823" cy:directed="1"/>
      <edge id="30871" label="WP_106115031_2 (interacts with) WP_052856102_1" source="30835" target="30841" cy:directed="1"/>
      <edge id="30870" label="WP_106115031_2 (interacts with) WP_079181075_3" source="30835" target="30827" cy:directed="1"/>
      <edge id="30858" label="WP_016570561_3 (interacts with) WP_104258544_3" source="30833" target="30823" cy:directed="1"/>
      <edge id="30857" label="WP_016570561_3 (interacts with) WP_079181075_3" source="30833" target="30827" cy:directed="1"/>
      <edge id="30875" label="WP_164312175_1 (interacts with) WP_016570561_3" source="30831" target="30833" cy:directed="1"/>
      <edge id="30874" label="WP_164312175_1 (interacts with) WP_141720451_4" source="30831" target="30821" cy:directed="1"/>
      <edge id="30844" label="WP_015659226_1 (interacts with) WP_016570561_3" source="30829" target="30833" cy:directed="1"/>
      <edge id="30843" label="WP_015659226_1 (interacts with) WP_164312175_1" source="30829" target="30831" cy:directed="1"/>
      <edge id="30842" label="WP_015659226_1 (interacts with) WP_052856102_1" source="30829" target="30841" cy:directed="1"/>
      <edge id="30840" label="WP_015659226_1 (interacts with) WP_079181075_3" source="30829" target="30827" cy:directed="1"/>
      <edge id="30839" label="WP_015659226_1 (interacts with) WP_133890759_1" source="30829" target="30825" cy:directed="1"/>
      <edge id="30838" label="WP_015659226_1 (interacts with) WP_104258544_3" source="30829" target="30823" cy:directed="1"/>
      <edge id="30837" label="WP_015659226_1 (interacts with) WP_141720451_4" source="30829" target="30821" cy:directed="1"/>
      <edge id="30836" label="WP_015659226_1 (interacts with) WP_106115031_2" source="30829" target="30835" cy:directed="1"/>
      <edge id="30845" label="WP_079181075_3 (interacts with) WP_104258544_3" source="30827" target="30823" cy:directed="1"/>
      <edge id="30878" label="WP_133890759_1 (interacts with) WP_164312175_1" source="30825" target="30831" cy:directed="1"/>
      <edge id="30877" label="WP_133890759_1 (interacts with) WP_104258544_3" source="30825" target="30823" cy:directed="1"/>
      <edge id="30876" label="WP_133890759_1 (interacts with) WP_141720451_4" source="30825" target="30821" cy:directed="1"/>
      <edge id="30834" label="WP_060892878_2 (interacts with) WP_016570561_3" source="30820" target="30833" cy:directed="1"/>
      <edge id="30832" label="WP_060892878_2 (interacts with) WP_164312175_1" source="30820" target="30831" cy:directed="1"/>
      <edge id="30830" label="WP_060892878_2 (interacts with) WP_015659226_1" source="30820" target="30829" cy:directed="1"/>
      <edge id="30828" label="WP_060892878_2 (interacts with) WP_079181075_3" source="30820" target="30827" cy:directed="1"/>
      <edge id="30826" label="WP_060892878_2 (interacts with) WP_133890759_1" source="30820" target="30825" cy:directed="1"/>
      <edge id="30824" label="WP_060892878_2 (interacts with) WP_104258544_3" source="30820" target="30823" cy:directed="1"/>
      <edge id="30822" label="WP_060892878_2 (interacts with) WP_141720451_4" source="30820" target="30821" cy:directed="1"/>
      <edge id="30819" label="WP_162681093_3 (interacts with) WP_088612422_3" source="30812" target="30775" cy:directed="1"/>
      <edge id="30818" label="WP_162681093_3 (interacts with) WP_068208510_1" source="30812" target="30771" cy:directed="1"/>
      <edge id="30817" label="WP_162681093_3 (interacts with) WP_037567380_2" source="30812" target="30783" cy:directed="1"/>
      <edge id="30816" label="WP_162681093_3 (interacts with) WP_096547181_4" source="30812" target="30762" cy:directed="1"/>
      <edge id="30815" label="WP_162681093_3 (interacts with) WP_104263878_1" source="30812" target="30765" cy:directed="1"/>
      <edge id="30814" label="WP_162681093_3 (interacts with) WP_027975917_3" source="30812" target="30767" cy:directed="1"/>
      <edge id="30813" label="WP_162681093_3 (interacts with) WP_068252194_1" source="30812" target="30769" cy:directed="1"/>
      <edge id="30803" label="WP_129202808_1 (interacts with) WP_104263878_1" source="30791" target="30765" cy:directed="1"/>
      <edge id="30802" label="WP_129202808_1 (interacts with) WP_017569537_3" source="30791" target="30793" cy:directed="1"/>
      <edge id="30790" label="WP_037567380_2 (interacts with) WP_068208510_1" source="30783" target="30771" cy:directed="1"/>
      <edge id="30789" label="WP_037567380_2 (interacts with) WP_068252194_1" source="30783" target="30769" cy:directed="1"/>
      <edge id="30788" label="WP_037567380_2 (interacts with) WP_104263878_1" source="30783" target="30765" cy:directed="1"/>
      <edge id="30787" label="WP_037567380_2 (interacts with) WP_096547181_4" source="30783" target="30762" cy:directed="1"/>
      <edge id="30786" label="WP_037567380_2 (interacts with) WP_088612422_3" source="30783" target="30775" cy:directed="1"/>
      <edge id="30785" label="WP_037567380_2 (interacts with) WP_107397356_2" source="30783" target="30780" cy:directed="1"/>
      <edge id="30784" label="WP_037567380_2 (interacts with) WP_088679810_2" source="30783" target="30763" cy:directed="1"/>
      <edge id="30808" label="WP_107397356_2 (interacts with) WP_068208510_1" source="30780" target="30771" cy:directed="1"/>
      <edge id="30807" label="WP_107397356_2 (interacts with) WP_096547181_4" source="30780" target="30762" cy:directed="1"/>
      <edge id="30806" label="WP_107397356_2 (interacts with) WP_104263878_1" source="30780" target="30765" cy:directed="1"/>
      <edge id="30805" label="WP_107397356_2 (interacts with) WP_068252194_1" source="30780" target="30769" cy:directed="1"/>
      <edge id="30804" label="WP_107397356_2 (interacts with) WP_088679810_2" source="30780" target="30763" cy:directed="1"/>
      <edge id="30782" label="WP_088612422_3 (interacts with) WP_068208510_1" source="30775" target="30771" cy:directed="1"/>
      <edge id="30781" label="WP_088612422_3 (interacts with) WP_107397356_2" source="30775" target="30780" cy:directed="1"/>
      <edge id="30779" label="WP_088612422_3 (interacts with) WP_096547181_4" source="30775" target="30762" cy:directed="1"/>
      <edge id="30778" label="WP_088612422_3 (interacts with) WP_104263878_1" source="30775" target="30765" cy:directed="1"/>
      <edge id="30777" label="WP_088612422_3 (interacts with) WP_068252194_1" source="30775" target="30769" cy:directed="1"/>
      <edge id="30776" label="WP_088612422_3 (interacts with) WP_088679810_2" source="30775" target="30763" cy:directed="1"/>
      <edge id="30796" label="WP_068208510_1 (interacts with) WP_027975917_3" source="30771" target="30767" cy:directed="1"/>
      <edge id="30795" label="WP_068208510_1 (interacts with) WP_068252194_1" source="30771" target="30769" cy:directed="1"/>
      <edge id="30794" label="WP_068208510_1 (interacts with) WP_017569537_3" source="30771" target="30793" cy:directed="1"/>
      <edge id="30792" label="WP_068208510_1 (interacts with) WP_129202808_1" source="30771" target="30791" cy:directed="1"/>
      <edge id="30811" label="WP_068252194_1 (interacts with) WP_027975917_3" source="30769" target="30767" cy:directed="1"/>
      <edge id="30810" label="WP_068252194_1 (interacts with) WP_017569537_3" source="30769" target="30793" cy:directed="1"/>
      <edge id="30809" label="WP_068252194_1 (interacts with) WP_129202808_1" source="30769" target="30791" cy:directed="1"/>
      <edge id="30801" label="WP_104263878_1 (interacts with) WP_068208510_1" source="30765" target="30771" cy:directed="1"/>
      <edge id="30800" label="WP_104263878_1 (interacts with) WP_027975917_3" source="30765" target="30767" cy:directed="1"/>
      <edge id="30799" label="WP_104263878_1 (interacts with) WP_068252194_1" source="30765" target="30769" cy:directed="1"/>
      <edge id="30798" label="WP_104263878_1 (interacts with) WP_017569537_3" source="30765" target="30793" cy:directed="1"/>
      <edge id="30797" label="WP_104263878_1 (interacts with) WP_088679810_2" source="30765" target="30763" cy:directed="1"/>
      <edge id="30774" label="WP_088679810_2 (interacts with) WP_068208510_1" source="30763" target="30771" cy:directed="1"/>
      <edge id="30773" label="WP_088679810_2 (interacts with) WP_068252194_1" source="30763" target="30769" cy:directed="1"/>
      <edge id="30772" label="WP_096547181_4 (interacts with) WP_068208510_1" source="30762" target="30771" cy:directed="1"/>
      <edge id="30770" label="WP_096547181_4 (interacts with) WP_068252194_1" source="30762" target="30769" cy:directed="1"/>
      <edge id="30768" label="WP_096547181_4 (interacts with) WP_027975917_3" source="30762" target="30767" cy:directed="1"/>
      <edge id="30766" label="WP_096547181_4 (interacts with) WP_104263878_1" source="30762" target="30765" cy:directed="1"/>
      <edge id="30764" label="WP_096547181_4 (interacts with) WP_088679810_2" source="30762" target="30763" cy:directed="1"/>
      <edge id="30756" label="RCJ30949_8 (interacts with) RCJ30949_11" source="30754" target="30750" cy:directed="1"/>
      <edge id="30755" label="RCJ30949_8 (interacts with) WP_015210601_5" source="30754" target="30716" cy:directed="1"/>
      <edge id="30753" label="RCJ30949_7 (interacts with) WP_096559014_9" source="30752" target="30728" cy:directed="1"/>
      <edge id="30747" label="WP_137906310_2 (interacts with) WP_168501874_1" source="30744" target="30713" cy:directed="1"/>
      <edge id="30746" label="WP_137906310_2 (interacts with) WP_168357543_2" source="30744" target="30722" cy:directed="1"/>
      <edge id="30745" label="WP_137906310_2 (interacts with) WP_015210601_5" source="30744" target="30716" cy:directed="1"/>
      <edge id="30736" label="WP_096559014_9 (interacts with) WP_015210601_3" source="30728" target="30720" cy:directed="1"/>
      <edge id="30735" label="WP_096559014_9 (interacts with) WP_137906310_3" source="30728" target="30732" cy:directed="1"/>
      <edge id="30743" label="WP_168357543_4 (interacts with) WP_015210601_3" source="30726" target="30720" cy:directed="1"/>
      <edge id="30742" label="WP_168357543_4 (interacts with) WP_137906310_3" source="30726" target="30732" cy:directed="1"/>
      <edge id="30734" label="WP_137906310_6 (interacts with) WP_015210601_3" source="30724" target="30720" cy:directed="1"/>
      <edge id="30733" label="WP_137906310_6 (interacts with) WP_137906310_3" source="30724" target="30732" cy:directed="1"/>
      <edge id="30731" label="WP_137906310_6 (interacts with) WP_168357543_6" source="30724" target="30718" cy:directed="1"/>
      <edge id="30730" label="WP_137906310_6 (interacts with) WP_168501874_2" source="30724" target="30714" cy:directed="1"/>
      <edge id="30729" label="WP_137906310_6 (interacts with) WP_096559014_9" source="30724" target="30728" cy:directed="1"/>
      <edge id="30727" label="WP_137906310_6 (interacts with) WP_168357543_4" source="30724" target="30726" cy:directed="1"/>
      <edge id="30741" label="WP_015210601_3 (interacts with) WP_137906310_3" source="30720" target="30732" cy:directed="1"/>
      <edge id="30740" label="WP_168357543_6 (interacts with) WP_015210601_3" source="30718" target="30720" cy:directed="1"/>
      <edge id="30739" label="WP_168357543_6 (interacts with) WP_137906310_3" source="30718" target="30732" cy:directed="1"/>
      <edge id="30738" label="WP_168357543_6 (interacts with) WP_096559014_9" source="30718" target="30728" cy:directed="1"/>
      <edge id="30737" label="WP_168357543_6 (interacts with) WP_168357543_4" source="30718" target="30726" cy:directed="1"/>
      <edge id="30751" label="WP_015210601_5 (interacts with) RCJ30949_11" source="30716" target="30750" cy:directed="1"/>
      <edge id="30749" label="WP_015210601_5 (interacts with) WP_168357543_2" source="30716" target="30722" cy:directed="1"/>
      <edge id="30748" label="WP_015210601_5 (interacts with) WP_015210601_3" source="30716" target="30720" cy:directed="1"/>
      <edge id="30761" label="WP_168501874_2 (interacts with) WP_015210601_3" source="30714" target="30720" cy:directed="1"/>
      <edge id="30760" label="WP_168501874_2 (interacts with) WP_137906310_3" source="30714" target="30732" cy:directed="1"/>
      <edge id="30759" label="WP_168501874_2 (interacts with) WP_168357543_6" source="30714" target="30718" cy:directed="1"/>
      <edge id="30758" label="WP_168501874_2 (interacts with) WP_096559014_9" source="30714" target="30728" cy:directed="1"/>
      <edge id="30757" label="WP_168501874_2 (interacts with) WP_168357543_4" source="30714" target="30726" cy:directed="1"/>
      <edge id="30725" label="WP_168501874_1 (interacts with) WP_137906310_6" source="30713" target="30724" cy:directed="1"/>
      <edge id="30723" label="WP_168501874_1 (interacts with) WP_168357543_2" source="30713" target="30722" cy:directed="1"/>
      <edge id="30721" label="WP_168501874_1 (interacts with) WP_015210601_3" source="30713" target="30720" cy:directed="1"/>
      <edge id="30719" label="WP_168501874_1 (interacts with) WP_168357543_6" source="30713" target="30718" cy:directed="1"/>
      <edge id="30717" label="WP_168501874_1 (interacts with) WP_015210601_5" source="30713" target="30716" cy:directed="1"/>
      <edge id="30715" label="WP_168501874_1 (interacts with) WP_168501874_2" source="30713" target="30714" cy:directed="1"/>
      <edge id="30698" label="CNF13542_1 (interacts with) WP_030452416_4" source="30687" target="30679" cy:directed="1"/>
      <edge id="30697" label="CNF13542_1 (interacts with) WP_131969051_3" source="30687" target="30648" cy:directed="1"/>
      <edge id="30696" label="CNF13542_1 (interacts with) WP_137248807_4" source="30687" target="30637" cy:directed="1"/>
      <edge id="30695" label="CNF13542_1 (interacts with) WP_161483240_4" source="30687" target="30639" cy:directed="1"/>
      <edge id="30694" label="CNF13542_1 (interacts with) WP_062437448_3" source="30687" target="30644" cy:directed="1"/>
      <edge id="30693" label="CNF13542_1 (interacts with) CNF13542_5" source="30687" target="30642" cy:directed="1"/>
      <edge id="30692" label="CNF13542_1 (interacts with) WP_062348671_4" source="30687" target="30632" cy:directed="1"/>
      <edge id="30691" label="CNF13542_1 (interacts with) WP_131969051_2" source="30687" target="30633" cy:directed="1"/>
      <edge id="30690" label="CNF13542_1 (interacts with) WP_062437448_4" source="30687" target="30680" cy:directed="1"/>
      <edge id="30689" label="CNF13542_1 (interacts with) WP_137248807_3" source="30687" target="30650" cy:directed="1"/>
      <edge id="30688" label="CNF13542_1 (interacts with) PZN45587_1" source="30687" target="30635" cy:directed="1"/>
      <edge id="30710" label="WP_062437448_4 (interacts with) WP_131969051_3" source="30680" target="30648" cy:directed="1"/>
      <edge id="30709" label="WP_062437448_4 (interacts with) WP_062348671_3" source="30680" target="30641" cy:directed="1"/>
      <edge id="30708" label="WP_062437448_4 (interacts with) WP_030452416_3" source="30680" target="30672" cy:directed="1"/>
      <edge id="30707" label="WP_062437448_4 (interacts with) WP_161483240_3" source="30680" target="30646" cy:directed="1"/>
      <edge id="30706" label="WP_062437448_4 (interacts with) WP_062437448_3" source="30680" target="30644" cy:directed="1"/>
      <edge id="30705" label="WP_062437448_4 (interacts with) WP_137248807_4" source="30680" target="30637" cy:directed="1"/>
      <edge id="30704" label="WP_062437448_4 (interacts with) WP_161483240_4" source="30680" target="30639" cy:directed="1"/>
      <edge id="30703" label="WP_062437448_4 (interacts with) CNF13542_5" source="30680" target="30642" cy:directed="1"/>
      <edge id="30702" label="WP_062437448_4 (interacts with) WP_131969051_2" source="30680" target="30633" cy:directed="1"/>
      <edge id="30701" label="WP_062437448_4 (interacts with) WP_062348671_4" source="30680" target="30632" cy:directed="1"/>
      <edge id="30700" label="WP_062437448_4 (interacts with) WP_137248807_3" source="30680" target="30650" cy:directed="1"/>
      <edge id="30699" label="WP_062437448_4 (interacts with) PZN45587_1" source="30680" target="30635" cy:directed="1"/>
      <edge id="30686" label="WP_030452416_4 (interacts with) WP_161483240_4" source="30679" target="30639" cy:directed="1"/>
      <edge id="30685" label="WP_030452416_4 (interacts with) WP_137248807_4" source="30679" target="30637" cy:directed="1"/>
      <edge id="30684" label="WP_030452416_4 (interacts with) PZN45587_1" source="30679" target="30635" cy:directed="1"/>
      <edge id="30683" label="WP_030452416_4 (interacts with) WP_062348671_4" source="30679" target="30632" cy:directed="1"/>
      <edge id="30682" label="WP_030452416_4 (interacts with) WP_131969051_2" source="30679" target="30633" cy:directed="1"/>
      <edge id="30681" label="WP_030452416_4 (interacts with) WP_062437448_4" source="30679" target="30680" cy:directed="1"/>
      <edge id="30678" label="WP_030452416_3 (interacts with) WP_137248807_3" source="30672" target="30650" cy:directed="1"/>
      <edge id="30677" label="WP_030452416_3 (interacts with) WP_062348671_3" source="30672" target="30641" cy:directed="1"/>
      <edge id="30676" label="WP_030452416_3 (interacts with) WP_131969051_3" source="30672" target="30648" cy:directed="1"/>
      <edge id="30675" label="WP_030452416_3 (interacts with) WP_161483240_3" source="30672" target="30646" cy:directed="1"/>
      <edge id="30674" label="WP_030452416_3 (interacts with) WP_062437448_3" source="30672" target="30644" cy:directed="1"/>
      <edge id="30673" label="WP_030452416_3 (interacts with) CNF13542_5" source="30672" target="30642" cy:directed="1"/>
      <edge id="30655" label="WP_137248807_3 (interacts with) WP_161483240_3" source="30650" target="30646" cy:directed="1"/>
      <edge id="30654" label="WP_137248807_3 (interacts with) WP_062437448_3" source="30650" target="30644" cy:directed="1"/>
      <edge id="30653" label="WP_137248807_3 (interacts with) WP_131969051_2" source="30650" target="30633" cy:directed="1"/>
      <edge id="30652" label="WP_137248807_3 (interacts with) CNF13542_5" source="30650" target="30642" cy:directed="1"/>
      <edge id="30666" label="WP_131969051_3 (interacts with) WP_161483240_3" source="30648" target="30646" cy:directed="1"/>
      <edge id="30665" label="WP_131969051_3 (interacts with) WP_062437448_3" source="30648" target="30644" cy:directed="1"/>
      <edge id="30664" label="WP_131969051_3 (interacts with) WP_131969051_2" source="30648" target="30633" cy:directed="1"/>
      <edge id="30663" label="WP_131969051_3 (interacts with) CNF13542_5" source="30648" target="30642" cy:directed="1"/>
      <edge id="30662" label="WP_131969051_3 (interacts with) WP_137248807_3" source="30648" target="30650" cy:directed="1"/>
      <edge id="30661" label="WP_161483240_3 (interacts with) WP_062437448_3" source="30646" target="30644" cy:directed="1"/>
      <edge id="30660" label="WP_161483240_3 (interacts with) CNF13542_5" source="30646" target="30642" cy:directed="1"/>
      <edge id="30656" label="CNF13542_5 (interacts with) WP_062437448_3" source="30642" target="30644" cy:directed="1"/>
      <edge id="30651" label="WP_062348671_3 (interacts with) WP_137248807_3" source="30641" target="30650" cy:directed="1"/>
      <edge id="30649" label="WP_062348671_3 (interacts with) WP_131969051_3" source="30641" target="30648" cy:directed="1"/>
      <edge id="30647" label="WP_062348671_3 (interacts with) WP_161483240_3" source="30641" target="30646" cy:directed="1"/>
      <edge id="30645" label="WP_062348671_3 (interacts with) WP_062437448_3" source="30641" target="30644" cy:directed="1"/>
      <edge id="30643" label="WP_062348671_3 (interacts with) CNF13542_5" source="30641" target="30642" cy:directed="1"/>
      <edge id="30712" label="WP_161483240_4 (interacts with) WP_137248807_4" source="30639" target="30637" cy:directed="1"/>
      <edge id="30711" label="WP_161483240_4 (interacts with) WP_131969051_2" source="30639" target="30633" cy:directed="1"/>
      <edge id="30671" label="PZN45587_1 (interacts with) WP_062437448_3" source="30635" target="30644" cy:directed="1"/>
      <edge id="30670" label="PZN45587_1 (interacts with) WP_137248807_4" source="30635" target="30637" cy:directed="1"/>
      <edge id="30669" label="PZN45587_1 (interacts with) WP_161483240_4" source="30635" target="30639" cy:directed="1"/>
      <edge id="30668" label="PZN45587_1 (interacts with) WP_131969051_2" source="30635" target="30633" cy:directed="1"/>
      <edge id="30667" label="PZN45587_1 (interacts with) WP_137248807_3" source="30635" target="30650" cy:directed="1"/>
      <edge id="30659" label="WP_131969051_2 (interacts with) WP_062437448_3" source="30633" target="30644" cy:directed="1"/>
      <edge id="30658" label="WP_131969051_2 (interacts with) WP_137248807_4" source="30633" target="30637" cy:directed="1"/>
      <edge id="30657" label="WP_131969051_2 (interacts with) CNF13542_5" source="30633" target="30642" cy:directed="1"/>
      <edge id="30640" label="WP_062348671_4 (interacts with) WP_161483240_4" source="30632" target="30639" cy:directed="1"/>
      <edge id="30638" label="WP_062348671_4 (interacts with) WP_137248807_4" source="30632" target="30637" cy:directed="1"/>
      <edge id="30636" label="WP_062348671_4 (interacts with) PZN45587_1" source="30632" target="30635" cy:directed="1"/>
      <edge id="30634" label="WP_062348671_4 (interacts with) WP_131969051_2" source="30632" target="30633" cy:directed="1"/>
      <edge id="30631" label="WP_039653089_1 (interacts with) WP_030193573_1" source="30618" target="30580" cy:directed="1"/>
      <edge id="30630" label="WP_039653089_1 (interacts with) WP_018962004_1" source="30618" target="30562" cy:directed="1"/>
      <edge id="30629" label="WP_039653089_1 (interacts with) WP_044449646_1" source="30618" target="30573" cy:directed="1"/>
      <edge id="30628" label="WP_039653089_1 (interacts with) WP_106236741_1" source="30618" target="30571" cy:directed="1"/>
      <edge id="30627" label="WP_039653089_1 (interacts with) WP_017595611_9003" source="30618" target="30534" cy:directed="1"/>
      <edge id="30626" label="WP_039653089_1 (interacts with) WP_046417231_1" source="30618" target="30547" cy:directed="1"/>
      <edge id="30625" label="WP_039653089_1 (interacts with) BBC15200_1" source="30618" target="30545" cy:directed="1"/>
      <edge id="30624" label="WP_039653089_1 (interacts with) WP_159037419_1" source="30618" target="30543" cy:directed="1"/>
      <edge id="30623" label="WP_039653089_1 (interacts with) WP_091117926_2" source="30618" target="30556" cy:directed="1"/>
      <edge id="30622" label="WP_039653089_1 (interacts with) WP_161634174_2" source="30618" target="30541" cy:directed="1"/>
      <edge id="30621" label="WP_039653089_1 (interacts with) WP_065960366_1" source="30618" target="30537" cy:directed="1"/>
      <edge id="30620" label="WP_039653089_1 (interacts with) BAN83919_1" source="30618" target="30539" cy:directed="1"/>
      <edge id="30619" label="WP_039653089_1 (interacts with) WP_129307706_1" source="30618" target="30535" cy:directed="1"/>
      <edge id="30592" label="WP_030193573_1 (interacts with) WP_018962004_1" source="30580" target="30562" cy:directed="1"/>
      <edge id="30591" label="WP_030193573_1 (interacts with) WP_044449646_1" source="30580" target="30573" cy:directed="1"/>
      <edge id="30590" label="WP_030193573_1 (interacts with) WP_106236741_1" source="30580" target="30571" cy:directed="1"/>
      <edge id="30589" label="WP_030193573_1 (interacts with) WP_017595611_9003" source="30580" target="30534" cy:directed="1"/>
      <edge id="30588" label="WP_030193573_1 (interacts with) BBC15200_1" source="30580" target="30545" cy:directed="1"/>
      <edge id="30587" label="WP_030193573_1 (interacts with) WP_046417231_1" source="30580" target="30547" cy:directed="1"/>
      <edge id="30586" label="WP_030193573_1 (interacts with) WP_159037419_1" source="30580" target="30543" cy:directed="1"/>
      <edge id="30585" label="WP_030193573_1 (interacts with) WP_091117926_2" source="30580" target="30556" cy:directed="1"/>
      <edge id="30584" label="WP_030193573_1 (interacts with) WP_161634174_2" source="30580" target="30541" cy:directed="1"/>
      <edge id="30583" label="WP_030193573_1 (interacts with) WP_065960366_1" source="30580" target="30537" cy:directed="1"/>
      <edge id="30582" label="WP_030193573_1 (interacts with) BAN83919_1" source="30580" target="30539" cy:directed="1"/>
      <edge id="30581" label="WP_030193573_1 (interacts with) WP_129307706_1" source="30580" target="30535" cy:directed="1"/>
      <edge id="30610" label="WP_044449646_1 (interacts with) WP_046417231_1" source="30573" target="30547" cy:directed="1"/>
      <edge id="30617" label="WP_106236741_1 (interacts with) WP_046417231_1" source="30571" target="30547" cy:directed="1"/>
      <edge id="30616" label="WP_106236741_1 (interacts with) WP_091117926_2" source="30571" target="30556" cy:directed="1"/>
      <edge id="30574" label="WP_018962004_1 (interacts with) WP_044449646_1" source="30562" target="30573" cy:directed="1"/>
      <edge id="30572" label="WP_018962004_1 (interacts with) WP_106236741_1" source="30562" target="30571" cy:directed="1"/>
      <edge id="30570" label="WP_018962004_1 (interacts with) WP_017595611_9003" source="30562" target="30534" cy:directed="1"/>
      <edge id="30569" label="WP_018962004_1 (interacts with) BBC15200_1" source="30562" target="30545" cy:directed="1"/>
      <edge id="30568" label="WP_018962004_1 (interacts with) WP_046417231_1" source="30562" target="30547" cy:directed="1"/>
      <edge id="30567" label="WP_018962004_1 (interacts with) WP_159037419_1" source="30562" target="30543" cy:directed="1"/>
      <edge id="30566" label="WP_018962004_1 (interacts with) WP_161634174_2" source="30562" target="30541" cy:directed="1"/>
      <edge id="30565" label="WP_018962004_1 (interacts with) WP_065960366_1" source="30562" target="30537" cy:directed="1"/>
      <edge id="30564" label="WP_018962004_1 (interacts with) BAN83919_1" source="30562" target="30539" cy:directed="1"/>
      <edge id="30563" label="WP_018962004_1 (interacts with) WP_129307706_1" source="30562" target="30535" cy:directed="1"/>
      <edge id="30615" label="WP_091117926_2 (interacts with) WP_017595611_9003" source="30556" target="30534" cy:directed="1"/>
      <edge id="30614" label="WP_091117926_2 (interacts with) WP_161634174_2" source="30556" target="30541" cy:directed="1"/>
      <edge id="30612" label="WP_131980220_1 (interacts with) WP_091117926_2" source="30553" target="30556" cy:directed="1"/>
      <edge id="30611" label="WP_131980220_1 (interacts with) WP_106236741_1" source="30553" target="30571" cy:directed="1"/>
      <edge id="30557" label="WP_020634200_1 (interacts with) WP_091117926_2" source="30551" target="30556" cy:directed="1"/>
      <edge id="30555" label="WP_020634200_1 (interacts with) WP_161634174_2" source="30551" target="30541" cy:directed="1"/>
      <edge id="30554" label="WP_020634200_1 (interacts with) WP_131980220_1" source="30551" target="30553" cy:directed="1"/>
      <edge id="30552" label="WP_020634200_1 (interacts with) WP_017595611_9003" source="30551" target="30534" cy:directed="1"/>
      <edge id="30561" label="WP_046417231_1 (interacts with) WP_091117926_2" source="30547" target="30556" cy:directed="1"/>
      <edge id="30560" label="WP_046417231_1 (interacts with) WP_161634174_2" source="30547" target="30541" cy:directed="1"/>
      <edge id="30559" label="WP_046417231_1 (interacts with) BAN83919_1" source="30547" target="30539" cy:directed="1"/>
      <edge id="30558" label="WP_046417231_1 (interacts with) WP_129307706_1" source="30547" target="30535" cy:directed="1"/>
      <edge id="30609" label="BBC15200_1 (interacts with) WP_044449646_1" source="30545" target="30573" cy:directed="1"/>
      <edge id="30608" label="BBC15200_1 (interacts with) WP_106236741_1" source="30545" target="30571" cy:directed="1"/>
      <edge id="30607" label="BBC15200_1 (interacts with) WP_046417231_1" source="30545" target="30547" cy:directed="1"/>
      <edge id="30606" label="BBC15200_1 (interacts with) WP_159037419_1" source="30545" target="30543" cy:directed="1"/>
      <edge id="30605" label="BBC15200_1 (interacts with) WP_091117926_2" source="30545" target="30556" cy:directed="1"/>
      <edge id="30604" label="BBC15200_1 (interacts with) WP_161634174_2" source="30545" target="30541" cy:directed="1"/>
      <edge id="30603" label="BBC15200_1 (interacts with) WP_065960366_1" source="30545" target="30537" cy:directed="1"/>
      <edge id="30602" label="BBC15200_1 (interacts with) BAN83919_1" source="30545" target="30539" cy:directed="1"/>
      <edge id="30601" label="BBC15200_1 (interacts with) WP_129307706_1" source="30545" target="30535" cy:directed="1"/>
      <edge id="30579" label="WP_159037419_1 (interacts with) WP_044449646_1" source="30543" target="30573" cy:directed="1"/>
      <edge id="30578" label="WP_159037419_1 (interacts with) WP_046417231_1" source="30543" target="30547" cy:directed="1"/>
      <edge id="30577" label="WP_159037419_1 (interacts with) WP_161634174_2" source="30543" target="30541" cy:directed="1"/>
      <edge id="30576" label="WP_159037419_1 (interacts with) BAN83919_1" source="30543" target="30539" cy:directed="1"/>
      <edge id="30575" label="WP_159037419_1 (interacts with) WP_129307706_1" source="30543" target="30535" cy:directed="1"/>
      <edge id="30613" label="WP_161634174_2 (interacts with) BAN83919_1" source="30541" target="30539" cy:directed="1"/>
      <edge id="30600" label="WP_065960366_1 (interacts with) WP_044449646_1" source="30537" target="30573" cy:directed="1"/>
      <edge id="30599" label="WP_065960366_1 (interacts with) WP_106236741_1" source="30537" target="30571" cy:directed="1"/>
      <edge id="30598" label="WP_065960366_1 (interacts with) WP_046417231_1" source="30537" target="30547" cy:directed="1"/>
      <edge id="30597" label="WP_065960366_1 (interacts with) WP_159037419_1" source="30537" target="30543" cy:directed="1"/>
      <edge id="30596" label="WP_065960366_1 (interacts with) WP_091117926_2" source="30537" target="30556" cy:directed="1"/>
      <edge id="30595" label="WP_065960366_1 (interacts with) WP_161634174_2" source="30537" target="30541" cy:directed="1"/>
      <edge id="30594" label="WP_065960366_1 (interacts with) BAN83919_1" source="30537" target="30539" cy:directed="1"/>
      <edge id="30593" label="WP_065960366_1 (interacts with) WP_129307706_1" source="30537" target="30535" cy:directed="1"/>
      <edge id="30550" label="WP_129307706_1 (interacts with) WP_161634174_2" source="30535" target="30541" cy:directed="1"/>
      <edge id="30549" label="WP_129307706_1 (interacts with) BAN83919_1" source="30535" target="30539" cy:directed="1"/>
      <edge id="30548" label="WP_017595611_9003 (interacts with) WP_046417231_1" source="30534" target="30547" cy:directed="1"/>
      <edge id="30546" label="WP_017595611_9003 (interacts with) BBC15200_1" source="30534" target="30545" cy:directed="1"/>
      <edge id="30544" label="WP_017595611_9003 (interacts with) WP_159037419_1" source="30534" target="30543" cy:directed="1"/>
      <edge id="30542" label="WP_017595611_9003 (interacts with) WP_161634174_2" source="30534" target="30541" cy:directed="1"/>
      <edge id="30540" label="WP_017595611_9003 (interacts with) BAN83919_1" source="30534" target="30539" cy:directed="1"/>
      <edge id="30538" label="WP_017595611_9003 (interacts with) WP_065960366_1" source="30534" target="30537" cy:directed="1"/>
      <edge id="30536" label="WP_017595611_9003 (interacts with) WP_129307706_1" source="30534" target="30535" cy:directed="1"/>
      <edge id="30533" label="WP_103031749_1 (interacts with) EES41370_3" source="30520" target="30406" cy:directed="1"/>
      <edge id="30532" label="WP_103031749_1 (interacts with) WP_027975917_4" source="30520" target="30404" cy:directed="1"/>
      <edge id="30531" label="WP_103031749_1 (interacts with) WP_104263878_2" source="30520" target="30431" cy:directed="1"/>
      <edge id="30530" label="WP_103031749_1 (interacts with) WP_102695456_1" source="30520" target="30402" cy:directed="1"/>
      <edge id="30529" label="WP_103031749_1 (interacts with) WP_088679810_1" source="30520" target="30489" cy:directed="1"/>
      <edge id="30528" label="WP_103031749_1 (interacts with) WP_096547181_5" source="30520" target="30400" cy:directed="1"/>
      <edge id="30527" label="WP_103031749_1 (interacts with) WP_030061393_1" source="30520" target="30398" cy:directed="1"/>
      <edge id="30526" label="WP_103031749_1 (interacts with) WP_105988468_5" source="30520" target="30385" cy:directed="1"/>
      <edge id="30525" label="WP_103031749_1 (interacts with) WP_037567380_3" source="30520" target="30396" cy:directed="1"/>
      <edge id="30524" label="WP_103031749_1 (interacts with) WP_016898474_1" source="30520" target="30392" cy:directed="1"/>
      <edge id="30523" label="WP_103031749_1 (interacts with) WP_162681093_4" source="30520" target="30390" cy:directed="1"/>
      <edge id="30522" label="WP_103031749_1 (interacts with) WP_088612422_2" source="30520" target="30388" cy:directed="1"/>
      <edge id="30521" label="WP_103031749_1 (interacts with) WP_107397356_1" source="30520" target="30386" cy:directed="1"/>
      <edge id="30500" label="WP_088679810_1 (interacts with) EES41370_3" source="30489" target="30406" cy:directed="1"/>
      <edge id="30499" label="WP_088679810_1 (interacts with) WP_027975917_4" source="30489" target="30404" cy:directed="1"/>
      <edge id="30498" label="WP_088679810_1 (interacts with) WP_096547181_5" source="30489" target="30400" cy:directed="1"/>
      <edge id="30497" label="WP_088679810_1 (interacts with) WP_102695456_1" source="30489" target="30402" cy:directed="1"/>
      <edge id="30496" label="WP_088679810_1 (interacts with) WP_030061393_1" source="30489" target="30398" cy:directed="1"/>
      <edge id="30495" label="WP_088679810_1 (interacts with) WP_037567380_3" source="30489" target="30396" cy:directed="1"/>
      <edge id="30494" label="WP_088679810_1 (interacts with) WP_068208510_2" source="30489" target="30436" cy:directed="1"/>
      <edge id="30493" label="WP_088679810_1 (interacts with) WP_016898474_1" source="30489" target="30392" cy:directed="1"/>
      <edge id="30492" label="WP_088679810_1 (interacts with) WP_068252194_2" source="30489" target="30408" cy:directed="1"/>
      <edge id="30491" label="WP_088679810_1 (interacts with) WP_162681093_4" source="30489" target="30390" cy:directed="1"/>
      <edge id="30490" label="WP_088679810_1 (interacts with) WP_107397356_1" source="30489" target="30386" cy:directed="1"/>
      <edge id="30467" label="WP_068208510_2 (interacts with) EES41370_3" source="30436" target="30406" cy:directed="1"/>
      <edge id="30466" label="WP_068208510_2 (interacts with) WP_027975917_4" source="30436" target="30404" cy:directed="1"/>
      <edge id="30465" label="WP_068208510_2 (interacts with) WP_096547181_5" source="30436" target="30400" cy:directed="1"/>
      <edge id="30464" label="WP_068208510_2 (interacts with) WP_102695456_1" source="30436" target="30402" cy:directed="1"/>
      <edge id="30463" label="WP_068208510_2 (interacts with) WP_030061393_1" source="30436" target="30398" cy:directed="1"/>
      <edge id="30462" label="WP_068208510_2 (interacts with) WP_105988468_5" source="30436" target="30385" cy:directed="1"/>
      <edge id="30461" label="WP_068208510_2 (interacts with) WP_037567380_3" source="30436" target="30396" cy:directed="1"/>
      <edge id="30460" label="WP_068208510_2 (interacts with) WP_129202808_2" source="30436" target="30394" cy:directed="1"/>
      <edge id="30459" label="WP_068208510_2 (interacts with) WP_016898474_1" source="30436" target="30392" cy:directed="1"/>
      <edge id="30458" label="WP_068208510_2 (interacts with) WP_068252194_2" source="30436" target="30408" cy:directed="1"/>
      <edge id="30457" label="WP_068208510_2 (interacts with) WP_162681093_4" source="30436" target="30390" cy:directed="1"/>
      <edge id="30456" label="WP_068208510_2 (interacts with) WP_107397356_1" source="30436" target="30386" cy:directed="1"/>
      <edge id="30445" label="WP_104263878_2 (interacts with) EES41370_3" source="30431" target="30406" cy:directed="1"/>
      <edge id="30444" label="WP_104263878_2 (interacts with) WP_027975917_4" source="30431" target="30404" cy:directed="1"/>
      <edge id="30443" label="WP_104263878_2 (interacts with) WP_102695456_1" source="30431" target="30402" cy:directed="1"/>
      <edge id="30442" label="WP_104263878_2 (interacts with) WP_096547181_5" source="30431" target="30400" cy:directed="1"/>
      <edge id="30441" label="WP_104263878_2 (interacts with) WP_030061393_1" source="30431" target="30398" cy:directed="1"/>
      <edge id="30440" label="WP_104263878_2 (interacts with) WP_105988468_5" source="30431" target="30385" cy:directed="1"/>
      <edge id="30439" label="WP_104263878_2 (interacts with) WP_037567380_3" source="30431" target="30396" cy:directed="1"/>
      <edge id="30438" label="WP_104263878_2 (interacts with) WP_129202808_2" source="30431" target="30394" cy:directed="1"/>
      <edge id="30437" label="WP_104263878_2 (interacts with) WP_068208510_2" source="30431" target="30436" cy:directed="1"/>
      <edge id="30435" label="WP_104263878_2 (interacts with) WP_016898474_1" source="30431" target="30392" cy:directed="1"/>
      <edge id="30434" label="WP_104263878_2 (interacts with) WP_068252194_2" source="30431" target="30408" cy:directed="1"/>
      <edge id="30433" label="WP_104263878_2 (interacts with) WP_162681093_4" source="30431" target="30390" cy:directed="1"/>
      <edge id="30432" label="WP_104263878_2 (interacts with) WP_107397356_1" source="30431" target="30386" cy:directed="1"/>
      <edge id="30485" label="WP_017569537_2 (interacts with) WP_027975917_4" source="30421" target="30404" cy:directed="1"/>
      <edge id="30484" label="WP_017569537_2 (interacts with) WP_037567380_3" source="30421" target="30396" cy:directed="1"/>
      <edge id="30418" label="WP_068252194_2 (interacts with) EES41370_3" source="30408" target="30406" cy:directed="1"/>
      <edge id="30417" label="WP_068252194_2 (interacts with) WP_027975917_4" source="30408" target="30404" cy:directed="1"/>
      <edge id="30416" label="WP_068252194_2 (interacts with) WP_102695456_1" source="30408" target="30402" cy:directed="1"/>
      <edge id="30415" label="WP_068252194_2 (interacts with) WP_096547181_5" source="30408" target="30400" cy:directed="1"/>
      <edge id="30414" label="WP_068252194_2 (interacts with) WP_030061393_1" source="30408" target="30398" cy:directed="1"/>
      <edge id="30413" label="WP_068252194_2 (interacts with) WP_105988468_5" source="30408" target="30385" cy:directed="1"/>
      <edge id="30412" label="WP_068252194_2 (interacts with) WP_037567380_3" source="30408" target="30396" cy:directed="1"/>
      <edge id="30411" label="WP_068252194_2 (interacts with) WP_016898474_1" source="30408" target="30392" cy:directed="1"/>
      <edge id="30410" label="WP_068252194_2 (interacts with) WP_162681093_4" source="30408" target="30390" cy:directed="1"/>
      <edge id="30409" label="WP_068252194_2 (interacts with) WP_107397356_1" source="30408" target="30386" cy:directed="1"/>
      <edge id="30488" label="EES41370_3 (interacts with) WP_096547181_5" source="30406" target="30400" cy:directed="1"/>
      <edge id="30487" label="EES41370_3 (interacts with) WP_037567380_3" source="30406" target="30396" cy:directed="1"/>
      <edge id="30486" label="EES41370_3 (interacts with) WP_016898474_1" source="30406" target="30392" cy:directed="1"/>
      <edge id="30470" label="WP_027975917_4 (interacts with) WP_096547181_5" source="30404" target="30400" cy:directed="1"/>
      <edge id="30469" label="WP_027975917_4 (interacts with) WP_102695456_1" source="30404" target="30402" cy:directed="1"/>
      <edge id="30468" label="WP_027975917_4 (interacts with) WP_037567380_3" source="30404" target="30396" cy:directed="1"/>
      <edge id="30430" label="WP_102695456_1 (interacts with) EES41370_3" source="30402" target="30406" cy:directed="1"/>
      <edge id="30429" label="WP_102695456_1 (interacts with) WP_096547181_5" source="30402" target="30400" cy:directed="1"/>
      <edge id="30428" label="WP_102695456_1 (interacts with) WP_129202808_2" source="30402" target="30394" cy:directed="1"/>
      <edge id="30427" label="WP_102695456_1 (interacts with) WP_017569537_2" source="30402" target="30421" cy:directed="1"/>
      <edge id="30426" label="WP_102695456_1 (interacts with) WP_030061393_1" source="30402" target="30398" cy:directed="1"/>
      <edge id="30425" label="WP_102695456_1 (interacts with) WP_037567380_3" source="30402" target="30396" cy:directed="1"/>
      <edge id="30424" label="WP_102695456_1 (interacts with) WP_016898474_1" source="30402" target="30392" cy:directed="1"/>
      <edge id="30422" label="WP_096547181_5 (interacts with) WP_017569537_2" source="30400" target="30421" cy:directed="1"/>
      <edge id="30420" label="WP_096547181_5 (interacts with) WP_037567380_3" source="30400" target="30396" cy:directed="1"/>
      <edge id="30419" label="WP_096547181_5 (interacts with) WP_016898474_1" source="30400" target="30392" cy:directed="1"/>
      <edge id="30474" label="WP_030061393_1 (interacts with) EES41370_3" source="30398" target="30406" cy:directed="1"/>
      <edge id="30473" label="WP_030061393_1 (interacts with) WP_096547181_5" source="30398" target="30400" cy:directed="1"/>
      <edge id="30472" label="WP_030061393_1 (interacts with) WP_037567380_3" source="30398" target="30396" cy:directed="1"/>
      <edge id="30471" label="WP_030061393_1 (interacts with) WP_016898474_1" source="30398" target="30392" cy:directed="1"/>
      <edge id="30423" label="WP_037567380_3 (interacts with) WP_016898474_1" source="30396" target="30392" cy:directed="1"/>
      <edge id="30455" label="WP_129202808_2 (interacts with) EES41370_3" source="30394" target="30406" cy:directed="1"/>
      <edge id="30454" label="WP_129202808_2 (interacts with) WP_027975917_4" source="30394" target="30404" cy:directed="1"/>
      <edge id="30453" label="WP_129202808_2 (interacts with) WP_017569537_2" source="30394" target="30421" cy:directed="1"/>
      <edge id="30452" label="WP_129202808_2 (interacts with) WP_096547181_5" source="30394" target="30400" cy:directed="1"/>
      <edge id="30451" label="WP_129202808_2 (interacts with) WP_030061393_1" source="30394" target="30398" cy:directed="1"/>
      <edge id="30450" label="WP_129202808_2 (interacts with) WP_037567380_3" source="30394" target="30396" cy:directed="1"/>
      <edge id="30449" label="WP_129202808_2 (interacts with) WP_016898474_1" source="30394" target="30392" cy:directed="1"/>
      <edge id="30448" label="WP_129202808_2 (interacts with) WP_068252194_2" source="30394" target="30408" cy:directed="1"/>
      <edge id="30447" label="WP_129202808_2 (interacts with) WP_162681093_4" source="30394" target="30390" cy:directed="1"/>
      <edge id="30446" label="WP_129202808_2 (interacts with) WP_107397356_1" source="30394" target="30386" cy:directed="1"/>
      <edge id="30519" label="WP_162681093_4 (interacts with) EES41370_3" source="30390" target="30406" cy:directed="1"/>
      <edge id="30518" label="WP_162681093_4 (interacts with) WP_096547181_5" source="30390" target="30400" cy:directed="1"/>
      <edge id="30517" label="WP_162681093_4 (interacts with) WP_102695456_1" source="30390" target="30402" cy:directed="1"/>
      <edge id="30516" label="WP_162681093_4 (interacts with) WP_027975917_4" source="30390" target="30404" cy:directed="1"/>
      <edge id="30515" label="WP_162681093_4 (interacts with) WP_017569537_2" source="30390" target="30421" cy:directed="1"/>
      <edge id="30514" label="WP_162681093_4 (interacts with) WP_030061393_1" source="30390" target="30398" cy:directed="1"/>
      <edge id="30513" label="WP_162681093_4 (interacts with) WP_037567380_3" source="30390" target="30396" cy:directed="1"/>
      <edge id="30512" label="WP_162681093_4 (interacts with) WP_016898474_1" source="30390" target="30392" cy:directed="1"/>
      <edge id="30511" label="WP_088612422_2 (interacts with) EES41370_3" source="30388" target="30406" cy:directed="1"/>
      <edge id="30510" label="WP_088612422_2 (interacts with) WP_027975917_4" source="30388" target="30404" cy:directed="1"/>
      <edge id="30509" label="WP_088612422_2 (interacts with) WP_104263878_2" source="30388" target="30431" cy:directed="1"/>
      <edge id="30508" label="WP_088612422_2 (interacts with) WP_102695456_1" source="30388" target="30402" cy:directed="1"/>
      <edge id="30507" label="WP_088612422_2 (interacts with) WP_088679810_1" source="30388" target="30489" cy:directed="1"/>
      <edge id="30506" label="WP_088612422_2 (interacts with) WP_096547181_5" source="30388" target="30400" cy:directed="1"/>
      <edge id="30505" label="WP_088612422_2 (interacts with) WP_030061393_1" source="30388" target="30398" cy:directed="1"/>
      <edge id="30504" label="WP_088612422_2 (interacts with) WP_037567380_3" source="30388" target="30396" cy:directed="1"/>
      <edge id="30503" label="WP_088612422_2 (interacts with) WP_016898474_1" source="30388" target="30392" cy:directed="1"/>
      <edge id="30502" label="WP_088612422_2 (interacts with) WP_162681093_4" source="30388" target="30390" cy:directed="1"/>
      <edge id="30501" label="WP_088612422_2 (interacts with) WP_107397356_1" source="30388" target="30386" cy:directed="1"/>
      <edge id="30483" label="WP_107397356_1 (interacts with) EES41370_3" source="30386" target="30406" cy:directed="1"/>
      <edge id="30482" label="WP_107397356_1 (interacts with) WP_096547181_5" source="30386" target="30400" cy:directed="1"/>
      <edge id="30481" label="WP_107397356_1 (interacts with) WP_102695456_1" source="30386" target="30402" cy:directed="1"/>
      <edge id="30480" label="WP_107397356_1 (interacts with) WP_027975917_4" source="30386" target="30404" cy:directed="1"/>
      <edge id="30479" label="WP_107397356_1 (interacts with) WP_017569537_2" source="30386" target="30421" cy:directed="1"/>
      <edge id="30478" label="WP_107397356_1 (interacts with) WP_030061393_1" source="30386" target="30398" cy:directed="1"/>
      <edge id="30477" label="WP_107397356_1 (interacts with) WP_037567380_3" source="30386" target="30396" cy:directed="1"/>
      <edge id="30476" label="WP_107397356_1 (interacts with) WP_016898474_1" source="30386" target="30392" cy:directed="1"/>
      <edge id="30475" label="WP_107397356_1 (interacts with) WP_162681093_4" source="30386" target="30390" cy:directed="1"/>
      <edge id="30407" label="WP_105988468_5 (interacts with) EES41370_3" source="30385" target="30406" cy:directed="1"/>
      <edge id="30405" label="WP_105988468_5 (interacts with) WP_027975917_4" source="30385" target="30404" cy:directed="1"/>
      <edge id="30403" label="WP_105988468_5 (interacts with) WP_102695456_1" source="30385" target="30402" cy:directed="1"/>
      <edge id="30401" label="WP_105988468_5 (interacts with) WP_096547181_5" source="30385" target="30400" cy:directed="1"/>
      <edge id="30399" label="WP_105988468_5 (interacts with) WP_030061393_1" source="30385" target="30398" cy:directed="1"/>
      <edge id="30397" label="WP_105988468_5 (interacts with) WP_037567380_3" source="30385" target="30396" cy:directed="1"/>
      <edge id="30395" label="WP_105988468_5 (interacts with) WP_129202808_2" source="30385" target="30394" cy:directed="1"/>
      <edge id="30393" label="WP_105988468_5 (interacts with) WP_016898474_1" source="30385" target="30392" cy:directed="1"/>
      <edge id="30391" label="WP_105988468_5 (interacts with) WP_162681093_4" source="30385" target="30390" cy:directed="1"/>
      <edge id="30389" label="WP_105988468_5 (interacts with) WP_088612422_2" source="30385" target="30388" cy:directed="1"/>
      <edge id="30387" label="WP_105988468_5 (interacts with) WP_107397356_1" source="30385" target="30386" cy:directed="1"/>
      <edge id="30384" label="WP_103138325_9 (interacts with) WP_086760950_10" source="30370" target="30225" cy:directed="1"/>
      <edge id="30383" label="WP_103138325_9 (interacts with) AVH79456_6" source="30370" target="30250" cy:directed="1"/>
      <edge id="30382" label="WP_103138325_9 (interacts with) WP_104899482_6" source="30370" target="30316" cy:directed="1"/>
      <edge id="30381" label="WP_103138325_9 (interacts with) TVP63782_7" source="30370" target="30228" cy:directed="1"/>
      <edge id="30380" label="WP_103138325_9 (interacts with) AVH79607_6" source="30370" target="30242" cy:directed="1"/>
      <edge id="30379" label="WP_103138325_9 (interacts with) AVH79628_6" source="30370" target="30331" cy:directed="1"/>
      <edge id="30378" label="WP_103138325_9 (interacts with) BBD66616_5" source="30370" target="30240" cy:directed="1"/>
      <edge id="30377" label="WP_103138325_9 (interacts with) WP_168643398_8" source="30370" target="30231" cy:directed="1"/>
      <edge id="30376" label="WP_103138325_9 (interacts with) WP_012409787_6" source="30370" target="30238" cy:directed="1"/>
      <edge id="30375" label="WP_103138325_9 (interacts with) WP_096589596_11" source="30370" target="30221" cy:directed="1"/>
      <edge id="30374" label="WP_103138325_9 (interacts with) AVH79662_6" source="30370" target="30246" cy:directed="1"/>
      <edge id="30373" label="WP_103138325_9 (interacts with) WP_012597836_8" source="30370" target="30219" cy:directed="1"/>
      <edge id="30372" label="WP_103138325_9 (interacts with) WP_167721203_9" source="30370" target="30217" cy:directed="1"/>
      <edge id="30371" label="WP_103138325_9 (interacts with) WP_124970176_5" source="30370" target="30214" cy:directed="1"/>
      <edge id="30369" label="WP_096679519_5 (interacts with) WP_086760950_10" source="30358" target="30225" cy:directed="1"/>
      <edge id="30368" label="WP_096679519_5 (interacts with) WP_104899482_6" source="30358" target="30316" cy:directed="1"/>
      <edge id="30367" label="WP_096679519_5 (interacts with) TVP63782_7" source="30358" target="30228" cy:directed="1"/>
      <edge id="30366" label="WP_096679519_5 (interacts with) AVH79607_6" source="30358" target="30242" cy:directed="1"/>
      <edge id="30365" label="WP_096679519_5 (interacts with) AVH79628_6" source="30358" target="30331" cy:directed="1"/>
      <edge id="30364" label="WP_096679519_5 (interacts with) BBD66616_5" source="30358" target="30240" cy:directed="1"/>
      <edge id="30363" label="WP_096679519_5 (interacts with) WP_168643398_8" source="30358" target="30231" cy:directed="1"/>
      <edge id="30362" label="WP_096679519_5 (interacts with) WP_015216084_11" source="30358" target="30248" cy:directed="1"/>
      <edge id="30361" label="WP_096679519_5 (interacts with) AVH79662_6" source="30358" target="30246" cy:directed="1"/>
      <edge id="30360" label="WP_096679519_5 (interacts with) WP_096589596_11" source="30358" target="30221" cy:directed="1"/>
      <edge id="30359" label="WP_096679519_5 (interacts with) WP_124970176_5" source="30358" target="30214" cy:directed="1"/>
      <edge id="30357" label="AVH79628_6 (interacts with) AVH79456_6" source="30331" target="30250" cy:directed="1"/>
      <edge id="30356" label="AVH79628_6 (interacts with) TVP63782_7" source="30331" target="30228" cy:directed="1"/>
      <edge id="30355" label="AVH79628_6 (interacts with) AVH79607_6" source="30331" target="30242" cy:directed="1"/>
      <edge id="30354" label="AVH79628_6 (interacts with) BBD66616_5" source="30331" target="30240" cy:directed="1"/>
      <edge id="30353" label="AVH79628_6 (interacts with) WP_012409787_6" source="30331" target="30238" cy:directed="1"/>
      <edge id="30352" label="AVH79628_6 (interacts with) AVH79662_6" source="30331" target="30246" cy:directed="1"/>
      <edge id="30351" label="AVH79628_6 (interacts with) WP_096589596_11" source="30331" target="30221" cy:directed="1"/>
      <edge id="30350" label="AVH79628_6 (interacts with) WP_012597836_8" source="30331" target="30219" cy:directed="1"/>
      <edge id="30349" label="AVH79628_6 (interacts with) WP_167721203_9" source="30331" target="30217" cy:directed="1"/>
      <edge id="30348" label="AVH79628_6 (interacts with) WP_087592205_7" source="30331" target="30215" cy:directed="1"/>
      <edge id="30333" label="WP_104899482_6 (interacts with) AVH79456_6" source="30316" target="30250" cy:directed="1"/>
      <edge id="30332" label="WP_104899482_6 (interacts with) AVH79628_6" source="30316" target="30331" cy:directed="1"/>
      <edge id="30330" label="WP_104899482_6 (interacts with) WP_168643398_8" source="30316" target="30231" cy:directed="1"/>
      <edge id="30329" label="WP_104899482_6 (interacts with) WP_015216084_11" source="30316" target="30248" cy:directed="1"/>
      <edge id="30328" label="WP_104899482_6 (interacts with) AVH79662_6" source="30316" target="30246" cy:directed="1"/>
      <edge id="30327" label="WP_104899482_6 (interacts with) WP_086760950_10" source="30316" target="30225" cy:directed="1"/>
      <edge id="30326" label="WP_104899482_6 (interacts with) TVP63782_7" source="30316" target="30228" cy:directed="1"/>
      <edge id="30325" label="WP_104899482_6 (interacts with) AVH79607_6" source="30316" target="30242" cy:directed="1"/>
      <edge id="30324" label="WP_104899482_6 (interacts with) BBD66616_5" source="30316" target="30240" cy:directed="1"/>
      <edge id="30323" label="WP_104899482_6 (interacts with) WP_012409787_6" source="30316" target="30238" cy:directed="1"/>
      <edge id="30322" label="WP_104899482_6 (interacts with) WP_012595952_4" source="30316" target="30223" cy:directed="1"/>
      <edge id="30321" label="WP_104899482_6 (interacts with) WP_096589596_11" source="30316" target="30221" cy:directed="1"/>
      <edge id="30320" label="WP_104899482_6 (interacts with) WP_012597836_8" source="30316" target="30219" cy:directed="1"/>
      <edge id="30319" label="WP_104899482_6 (interacts with) WP_167721203_9" source="30316" target="30217" cy:directed="1"/>
      <edge id="30318" label="WP_104899482_6 (interacts with) WP_124970176_5" source="30316" target="30214" cy:directed="1"/>
      <edge id="30317" label="WP_104899482_6 (interacts with) WP_087592205_7" source="30316" target="30215" cy:directed="1"/>
      <edge id="30265" label="WP_019501037_4 (interacts with) WP_096589596_11" source="30263" target="30221" cy:directed="1"/>
      <edge id="30264" label="WP_019501037_4 (interacts with) BBD66616_5" source="30263" target="30240" cy:directed="1"/>
      <edge id="30305" label="AVH79456_6 (interacts with) WP_015216084_11" source="30250" target="30248" cy:directed="1"/>
      <edge id="30304" label="AVH79456_6 (interacts with) WP_086760950_10" source="30250" target="30225" cy:directed="1"/>
      <edge id="30303" label="AVH79456_6 (interacts with) TVP63782_7" source="30250" target="30228" cy:directed="1"/>
      <edge id="30302" label="AVH79456_6 (interacts with) AVH79607_6" source="30250" target="30242" cy:directed="1"/>
      <edge id="30301" label="AVH79456_6 (interacts with) WP_012409787_6" source="30250" target="30238" cy:directed="1"/>
      <edge id="30300" label="AVH79456_6 (interacts with) WP_012595952_4" source="30250" target="30223" cy:directed="1"/>
      <edge id="30299" label="AVH79456_6 (interacts with) WP_096589596_11" source="30250" target="30221" cy:directed="1"/>
      <edge id="30298" label="AVH79456_6 (interacts with) WP_012597836_8" source="30250" target="30219" cy:directed="1"/>
      <edge id="30297" label="AVH79456_6 (interacts with) WP_167721203_9" source="30250" target="30217" cy:directed="1"/>
      <edge id="30296" label="AVH79456_6 (interacts with) WP_124970176_5" source="30250" target="30214" cy:directed="1"/>
      <edge id="30295" label="AVH79456_6 (interacts with) WP_087592205_7" source="30250" target="30215" cy:directed="1"/>
      <edge id="30274" label="WP_015216084_11 (interacts with) WP_086760950_10" source="30248" target="30225" cy:directed="1"/>
      <edge id="30273" label="WP_015216084_11 (interacts with) TVP63782_7" source="30248" target="30228" cy:directed="1"/>
      <edge id="30272" label="WP_015216084_11 (interacts with) WP_012409787_6" source="30248" target="30238" cy:directed="1"/>
      <edge id="30271" label="WP_015216084_11 (interacts with) WP_096589596_11" source="30248" target="30221" cy:directed="1"/>
      <edge id="30270" label="WP_015216084_11 (interacts with) WP_012597836_8" source="30248" target="30219" cy:directed="1"/>
      <edge id="30269" label="WP_015216084_11 (interacts with) WP_167721203_9" source="30248" target="30217" cy:directed="1"/>
      <edge id="30268" label="WP_015216084_11 (interacts with) WP_124970176_5" source="30248" target="30214" cy:directed="1"/>
      <edge id="30267" label="WP_015216084_11 (interacts with) WP_087592205_7" source="30248" target="30215" cy:directed="1"/>
      <edge id="30315" label="AVH79662_6 (interacts with) WP_086760950_10" source="30246" target="30225" cy:directed="1"/>
      <edge id="30314" label="AVH79662_6 (interacts with) AVH79456_6" source="30246" target="30250" cy:directed="1"/>
      <edge id="30313" label="AVH79662_6 (interacts with) TVP63782_7" source="30246" target="30228" cy:directed="1"/>
      <edge id="30312" label="AVH79662_6 (interacts with) AVH79607_6" source="30246" target="30242" cy:directed="1"/>
      <edge id="30311" label="AVH79662_6 (interacts with) WP_015216084_11" source="30246" target="30248" cy:directed="1"/>
      <edge id="30310" label="AVH79662_6 (interacts with) WP_012409787_6" source="30246" target="30238" cy:directed="1"/>
      <edge id="30309" label="AVH79662_6 (interacts with) WP_096589596_11" source="30246" target="30221" cy:directed="1"/>
      <edge id="30308" label="AVH79662_6 (interacts with) WP_012597836_8" source="30246" target="30219" cy:directed="1"/>
      <edge id="30307" label="AVH79662_6 (interacts with) WP_167721203_9" source="30246" target="30217" cy:directed="1"/>
      <edge id="30306" label="AVH79662_6 (interacts with) WP_087592205_7" source="30246" target="30215" cy:directed="1"/>
      <edge id="30284" label="AVH79607_6 (interacts with) WP_015216084_11" source="30242" target="30248" cy:directed="1"/>
      <edge id="30283" label="AVH79607_6 (interacts with) WP_086760950_10" source="30242" target="30225" cy:directed="1"/>
      <edge id="30282" label="AVH79607_6 (interacts with) TVP63782_7" source="30242" target="30228" cy:directed="1"/>
      <edge id="30281" label="AVH79607_6 (interacts with) WP_012409787_6" source="30242" target="30238" cy:directed="1"/>
      <edge id="30280" label="AVH79607_6 (interacts with) WP_012595952_4" source="30242" target="30223" cy:directed="1"/>
      <edge id="30279" label="AVH79607_6 (interacts with) WP_096589596_11" source="30242" target="30221" cy:directed="1"/>
      <edge id="30278" label="AVH79607_6 (interacts with) WP_012597836_8" source="30242" target="30219" cy:directed="1"/>
      <edge id="30277" label="AVH79607_6 (interacts with) WP_167721203_9" source="30242" target="30217" cy:directed="1"/>
      <edge id="30276" label="AVH79607_6 (interacts with) WP_124970176_5" source="30242" target="30214" cy:directed="1"/>
      <edge id="30275" label="AVH79607_6 (interacts with) WP_087592205_7" source="30242" target="30215" cy:directed="1"/>
      <edge id="30347" label="BBD66616_5 (interacts with) AVH79456_6" source="30240" target="30250" cy:directed="1"/>
      <edge id="30346" label="BBD66616_5 (interacts with) WP_015216084_11" source="30240" target="30248" cy:directed="1"/>
      <edge id="30345" label="BBD66616_5 (interacts with) AVH79662_6" source="30240" target="30246" cy:directed="1"/>
      <edge id="30344" label="BBD66616_5 (interacts with) WP_086760950_10" source="30240" target="30225" cy:directed="1"/>
      <edge id="30343" label="BBD66616_5 (interacts with) TVP63782_7" source="30240" target="30228" cy:directed="1"/>
      <edge id="30342" label="BBD66616_5 (interacts with) AVH79607_6" source="30240" target="30242" cy:directed="1"/>
      <edge id="30341" label="BBD66616_5 (interacts with) WP_012409787_6" source="30240" target="30238" cy:directed="1"/>
      <edge id="30340" label="BBD66616_5 (interacts with) WP_096589596_11" source="30240" target="30221" cy:directed="1"/>
      <edge id="30339" label="BBD66616_5 (interacts with) WP_012597836_8" source="30240" target="30219" cy:directed="1"/>
      <edge id="30338" label="BBD66616_5 (interacts with) WP_167721203_9" source="30240" target="30217" cy:directed="1"/>
      <edge id="30337" label="BBD66616_5 (interacts with) WP_124970176_5" source="30240" target="30214" cy:directed="1"/>
      <edge id="30336" label="BBD66616_5 (interacts with) WP_087592205_7" source="30240" target="30215" cy:directed="1"/>
      <edge id="30262" label="WP_012409787_6 (interacts with) WP_086760950_10" source="30238" target="30225" cy:directed="1"/>
      <edge id="30261" label="WP_012409787_6 (interacts with) TVP63782_7" source="30238" target="30228" cy:directed="1"/>
      <edge id="30260" label="WP_012409787_6 (interacts with) WP_096589596_11" source="30238" target="30221" cy:directed="1"/>
      <edge id="30259" label="WP_012409787_6 (interacts with) WP_012597836_8" source="30238" target="30219" cy:directed="1"/>
      <edge id="30258" label="WP_012409787_6 (interacts with) WP_167721203_9" source="30238" target="30217" cy:directed="1"/>
      <edge id="30257" label="WP_012409787_6 (interacts with) WP_124970176_5" source="30238" target="30214" cy:directed="1"/>
      <edge id="30256" label="WP_012409787_6 (interacts with) WP_087592205_7" source="30238" target="30215" cy:directed="1"/>
      <edge id="30251" label="WP_168643398_8 (interacts with) AVH79456_6" source="30231" target="30250" cy:directed="1"/>
      <edge id="30249" label="WP_168643398_8 (interacts with) WP_015216084_11" source="30231" target="30248" cy:directed="1"/>
      <edge id="30247" label="WP_168643398_8 (interacts with) AVH79662_6" source="30231" target="30246" cy:directed="1"/>
      <edge id="30245" label="WP_168643398_8 (interacts with) WP_086760950_10" source="30231" target="30225" cy:directed="1"/>
      <edge id="30244" label="WP_168643398_8 (interacts with) TVP63782_7" source="30231" target="30228" cy:directed="1"/>
      <edge id="30243" label="WP_168643398_8 (interacts with) AVH79607_6" source="30231" target="30242" cy:directed="1"/>
      <edge id="30241" label="WP_168643398_8 (interacts with) BBD66616_5" source="30231" target="30240" cy:directed="1"/>
      <edge id="30239" label="WP_168643398_8 (interacts with) WP_012409787_6" source="30231" target="30238" cy:directed="1"/>
      <edge id="30237" label="WP_168643398_8 (interacts with) WP_012595952_4" source="30231" target="30223" cy:directed="1"/>
      <edge id="30236" label="WP_168643398_8 (interacts with) WP_096589596_11" source="30231" target="30221" cy:directed="1"/>
      <edge id="30235" label="WP_168643398_8 (interacts with) WP_012597836_8" source="30231" target="30219" cy:directed="1"/>
      <edge id="30234" label="WP_168643398_8 (interacts with) WP_167721203_9" source="30231" target="30217" cy:directed="1"/>
      <edge id="30233" label="WP_168643398_8 (interacts with) WP_124970176_5" source="30231" target="30214" cy:directed="1"/>
      <edge id="30232" label="WP_168643398_8 (interacts with) WP_087592205_7" source="30231" target="30215" cy:directed="1"/>
      <edge id="30266" label="TVP63782_7 (interacts with) WP_086760950_10" source="30228" target="30225" cy:directed="1"/>
      <edge id="30288" label="WP_012595952_4 (interacts with) WP_086760950_10" source="30223" target="30225" cy:directed="1"/>
      <edge id="30287" label="WP_012595952_4 (interacts with) WP_012597836_8" source="30223" target="30219" cy:directed="1"/>
      <edge id="30286" label="WP_012595952_4 (interacts with) WP_167721203_9" source="30223" target="30217" cy:directed="1"/>
      <edge id="30285" label="WP_012595952_4 (interacts with) WP_087592205_7" source="30223" target="30215" cy:directed="1"/>
      <edge id="30294" label="WP_096589596_11 (interacts with) WP_086760950_10" source="30221" target="30225" cy:directed="1"/>
      <edge id="30293" label="WP_096589596_11 (interacts with) TVP63782_7" source="30221" target="30228" cy:directed="1"/>
      <edge id="30292" label="WP_096589596_11 (interacts with) WP_012595952_4" source="30221" target="30223" cy:directed="1"/>
      <edge id="30291" label="WP_096589596_11 (interacts with) WP_012597836_8" source="30221" target="30219" cy:directed="1"/>
      <edge id="30290" label="WP_096589596_11 (interacts with) WP_167721203_9" source="30221" target="30217" cy:directed="1"/>
      <edge id="30289" label="WP_096589596_11 (interacts with) WP_087592205_7" source="30221" target="30215" cy:directed="1"/>
      <edge id="30335" label="WP_012597836_8 (interacts with) WP_086760950_10" source="30219" target="30225" cy:directed="1"/>
      <edge id="30334" label="WP_012597836_8 (interacts with) TVP63782_7" source="30219" target="30228" cy:directed="1"/>
      <edge id="30255" label="WP_167721203_9 (interacts with) WP_086760950_10" source="30217" target="30225" cy:directed="1"/>
      <edge id="30254" label="WP_167721203_9 (interacts with) TVP63782_7" source="30217" target="30228" cy:directed="1"/>
      <edge id="30253" label="WP_167721203_9 (interacts with) WP_012597836_8" source="30217" target="30219" cy:directed="1"/>
      <edge id="30252" label="WP_167721203_9 (interacts with) WP_087592205_7" source="30217" target="30215" cy:directed="1"/>
      <edge id="30230" label="WP_087592205_7 (interacts with) WP_086760950_10" source="30215" target="30225" cy:directed="1"/>
      <edge id="30229" label="WP_087592205_7 (interacts with) TVP63782_7" source="30215" target="30228" cy:directed="1"/>
      <edge id="30227" label="WP_087592205_7 (interacts with) WP_012597836_8" source="30215" target="30219" cy:directed="1"/>
      <edge id="30226" label="WP_124970176_5 (interacts with) WP_086760950_10" source="30214" target="30225" cy:directed="1"/>
      <edge id="30224" label="WP_124970176_5 (interacts with) WP_012595952_4" source="30214" target="30223" cy:directed="1"/>
      <edge id="30222" label="WP_124970176_5 (interacts with) WP_096589596_11" source="30214" target="30221" cy:directed="1"/>
      <edge id="30220" label="WP_124970176_5 (interacts with) WP_012597836_8" source="30214" target="30219" cy:directed="1"/>
      <edge id="30218" label="WP_124970176_5 (interacts with) WP_167721203_9" source="30214" target="30217" cy:directed="1"/>
      <edge id="30216" label="WP_124970176_5 (interacts with) WP_087592205_7" source="30214" target="30215" cy:directed="1"/>
      <edge id="30213" label="WP_015210601_4 (interacts with) BAZ29283_6" source="30211" target="30181" cy:directed="1"/>
      <edge id="30212" label="WP_015210601_4 (interacts with) WP_015127932_6" source="30211" target="30159" cy:directed="1"/>
      <edge id="30209" label="WP_026100063_8 (interacts with) WP_010996095_2" source="30204" target="30193" cy:directed="1"/>
      <edge id="30208" label="WP_026100063_8 (interacts with) WP_066383651_7" source="30204" target="30185" cy:directed="1"/>
      <edge id="30207" label="WP_026100063_8 (interacts with) WP_011321056_6" source="30204" target="30191" cy:directed="1"/>
      <edge id="30206" label="WP_026100063_8 (interacts with) WP_096681247_9" source="30204" target="30189" cy:directed="1"/>
      <edge id="30205" label="WP_026100063_8 (interacts with) WP_103136595_4" source="30204" target="30187" cy:directed="1"/>
      <edge id="30203" label="WP_012409362_10 (interacts with) WP_138499068_7" source="30200" target="30162" cy:directed="1"/>
      <edge id="30202" label="WP_012409362_10 (interacts with) WP_114082527_8" source="30200" target="30160" cy:directed="1"/>
      <edge id="30201" label="WP_012409362_10 (interacts with) WP_015127932_6" source="30200" target="30159" cy:directed="1"/>
      <edge id="30199" label="WP_010996095_2 (interacts with) WP_096681247_9" source="30193" target="30189" cy:directed="1"/>
      <edge id="30198" label="WP_010996095_2 (interacts with) WP_103136595_4" source="30193" target="30187" cy:directed="1"/>
      <edge id="30197" label="WP_011321056_6 (interacts with) WP_010996095_2" source="30191" target="30193" cy:directed="1"/>
      <edge id="30196" label="WP_011321056_6 (interacts with) WP_096681247_9" source="30191" target="30189" cy:directed="1"/>
      <edge id="30195" label="WP_011321056_6 (interacts with) WP_103136595_4" source="30191" target="30187" cy:directed="1"/>
      <edge id="30194" label="WP_066383651_7 (interacts with) WP_010996095_2" source="30185" target="30193" cy:directed="1"/>
      <edge id="30192" label="WP_066383651_7 (interacts with) WP_011321056_6" source="30185" target="30191" cy:directed="1"/>
      <edge id="30190" label="WP_066383651_7 (interacts with) WP_096681247_9" source="30185" target="30189" cy:directed="1"/>
      <edge id="30188" label="WP_066383651_7 (interacts with) WP_103136595_4" source="30185" target="30187" cy:directed="1"/>
      <edge id="30186" label="WP_066383651_7 (interacts with) WP_096569967_9" source="30185" target="30165" cy:directed="1"/>
      <edge id="30183" label="BAZ29283_6 (interacts with) WP_069073064_3" source="30181" target="30182" cy:directed="1"/>
      <edge id="30180" label="WP_015212417_5 (interacts with) WP_071189061_5" source="30177" target="30164" cy:directed="1"/>
      <edge id="30179" label="WP_015212417_5 (interacts with) WP_013190203_3" source="30177" target="30167" cy:directed="1"/>
      <edge id="30178" label="WP_015212417_5 (interacts with) WP_096569967_9" source="30177" target="30165" cy:directed="1"/>
      <edge id="30184" label="WP_009343975_3 (interacts with) WP_096569967_9" source="30171" target="30165" cy:directed="1"/>
      <edge id="30172" label="WP_057178590_7 (interacts with) WP_009343975_3" source="30169" target="30171" cy:directed="1"/>
      <edge id="30170" label="WP_057178590_7 (interacts with) WP_096569967_9" source="30169" target="30165" cy:directed="1"/>
      <edge id="30176" label="WP_096569967_9 (interacts with) WP_016950446_5" source="30165" target="30175" cy:directed="1"/>
      <edge id="30174" label="WP_096569967_9 (interacts with) WP_013190203_3" source="30165" target="30167" cy:directed="1"/>
      <edge id="30168" label="WP_071189061_5 (interacts with) WP_013190203_3" source="30164" target="30167" cy:directed="1"/>
      <edge id="30166" label="WP_071189061_5 (interacts with) WP_096569967_9" source="30164" target="30165" cy:directed="1"/>
      <edge id="30173" label="WP_138499068_7 (interacts with) WP_114082527_8" source="30162" target="30160" cy:directed="1"/>
      <edge id="30210" label="WP_114082527_8 (interacts with) WP_010996095_2" source="30160" target="30193" cy:directed="1"/>
      <edge id="30163" label="WP_015127932_6 (interacts with) WP_138499068_7" source="30159" target="30162" cy:directed="1"/>
      <edge id="30161" label="WP_015127932_6 (interacts with) WP_114082527_8" source="30159" target="30160" cy:directed="1"/>
      <edge id="30158" label="WP_058047489_2 (interacts with) WP_114054648_2" source="30141" target="29995" cy:directed="1"/>
      <edge id="30157" label="WP_058047489_2 (interacts with) WP_018960901_2" source="30141" target="29993" cy:directed="1"/>
      <edge id="30156" label="WP_058047489_2 (interacts with) WP_096622718_4" source="30141" target="30012" cy:directed="1"/>
      <edge id="30155" label="WP_058047489_2 (interacts with) WP_051840194_5" source="30141" target="29991" cy:directed="1"/>
      <edge id="30154" label="WP_058047489_2 (interacts with) WP_073726342_2" source="30141" target="30038" cy:directed="1"/>
      <edge id="30153" label="WP_058047489_2 (interacts with) WP_031017311_1" source="30141" target="30010" cy:directed="1"/>
      <edge id="30152" label="WP_058047489_2 (interacts with) WP_120754718_2" source="30141" target="29980" cy:directed="1"/>
      <edge id="30151" label="WP_058047489_2 (interacts with) WP_141310912_2" source="30141" target="29989" cy:directed="1"/>
      <edge id="30150" label="WP_058047489_2 (interacts with) WP_126393842_2" source="30141" target="29987" cy:directed="1"/>
      <edge id="30149" label="WP_058047489_2 (interacts with) WP_157857956_2" source="30141" target="30113" cy:directed="1"/>
      <edge id="30148" label="WP_058047489_2 (interacts with) WP_093908736_2" source="30141" target="30050" cy:directed="1"/>
      <edge id="30147" label="WP_058047489_2 (interacts with) WP_097866484_2" source="30141" target="29985" cy:directed="1"/>
      <edge id="30146" label="WP_058047489_2 (interacts with) WP_044377254_1" source="30141" target="29983" cy:directed="1"/>
      <edge id="30145" label="WP_058047489_2 (interacts with) WP_124271963_2" source="30141" target="30003" cy:directed="1"/>
      <edge id="30144" label="WP_058047489_2 (interacts with) WP_107115831_3" source="30141" target="29981" cy:directed="1"/>
      <edge id="30143" label="WP_058047489_2 (interacts with) WP_159688203_2" source="30141" target="30000" cy:directed="1"/>
      <edge id="30142" label="WP_058047489_2 (interacts with) WP_159770677_3" source="30141" target="29997" cy:directed="1"/>
      <edge id="30131" label="WP_157857956_2 (interacts with) WP_114054648_2" source="30113" target="29995" cy:directed="1"/>
      <edge id="30130" label="WP_157857956_2 (interacts with) WP_125506282_1" source="30113" target="30017" cy:directed="1"/>
      <edge id="30129" label="WP_157857956_2 (interacts with) WP_018960901_2" source="30113" target="29993" cy:directed="1"/>
      <edge id="30128" label="WP_157857956_2 (interacts with) WP_051840194_5" source="30113" target="29991" cy:directed="1"/>
      <edge id="30127" label="WP_157857956_2 (interacts with) WP_096622718_4" source="30113" target="30012" cy:directed="1"/>
      <edge id="30126" label="WP_157857956_2 (interacts with) WP_073726342_2" source="30113" target="30038" cy:directed="1"/>
      <edge id="30125" label="WP_157857956_2 (interacts with) WP_031017311_1" source="30113" target="30010" cy:directed="1"/>
      <edge id="30124" label="WP_157857956_2 (interacts with) WP_120754718_2" source="30113" target="29980" cy:directed="1"/>
      <edge id="30123" label="WP_157857956_2 (interacts with) WP_141310912_2" source="30113" target="29989" cy:directed="1"/>
      <edge id="30122" label="WP_157857956_2 (interacts with) WP_126393842_2" source="30113" target="29987" cy:directed="1"/>
      <edge id="30121" label="WP_157857956_2 (interacts with) WP_097866484_2" source="30113" target="29985" cy:directed="1"/>
      <edge id="30120" label="WP_157857956_2 (interacts with) WP_093908736_2" source="30113" target="30050" cy:directed="1"/>
      <edge id="30119" label="WP_157857956_2 (interacts with) WP_044377254_1" source="30113" target="29983" cy:directed="1"/>
      <edge id="30118" label="WP_157857956_2 (interacts with) WP_124271963_2" source="30113" target="30003" cy:directed="1"/>
      <edge id="30117" label="WP_157857956_2 (interacts with) WP_107115831_3" source="30113" target="29981" cy:directed="1"/>
      <edge id="30116" label="WP_157857956_2 (interacts with) WP_159688203_2" source="30113" target="30000" cy:directed="1"/>
      <edge id="30115" label="WP_157857956_2 (interacts with) WP_159770677_3" source="30113" target="29997" cy:directed="1"/>
      <edge id="30114" label="WP_157857956_2 (interacts with) WP_158686821_3" source="30113" target="29998" cy:directed="1"/>
      <edge id="30068" label="WP_051746348_1 (interacts with) WP_051840194_5" source="30067" target="29991" cy:directed="1"/>
      <edge id="30066" label="WP_093908736_2 (interacts with) WP_114054648_2" source="30050" target="29995" cy:directed="1"/>
      <edge id="30065" label="WP_093908736_2 (interacts with) WP_018960901_2" source="30050" target="29993" cy:directed="1"/>
      <edge id="30064" label="WP_093908736_2 (interacts with) WP_051840194_5" source="30050" target="29991" cy:directed="1"/>
      <edge id="30063" label="WP_093908736_2 (interacts with) WP_096622718_4" source="30050" target="30012" cy:directed="1"/>
      <edge id="30062" label="WP_093908736_2 (interacts with) WP_073726342_2" source="30050" target="30038" cy:directed="1"/>
      <edge id="30061" label="WP_093908736_2 (interacts with) WP_031017311_1" source="30050" target="30010" cy:directed="1"/>
      <edge id="30060" label="WP_093908736_2 (interacts with) WP_120754718_2" source="30050" target="29980" cy:directed="1"/>
      <edge id="30059" label="WP_093908736_2 (interacts with) WP_141310912_2" source="30050" target="29989" cy:directed="1"/>
      <edge id="30058" label="WP_093908736_2 (interacts with) WP_126393842_2" source="30050" target="29987" cy:directed="1"/>
      <edge id="30057" label="WP_093908736_2 (interacts with) WP_097866484_2" source="30050" target="29985" cy:directed="1"/>
      <edge id="30056" label="WP_093908736_2 (interacts with) WP_044377254_1" source="30050" target="29983" cy:directed="1"/>
      <edge id="30055" label="WP_093908736_2 (interacts with) WP_124271963_2" source="30050" target="30003" cy:directed="1"/>
      <edge id="30054" label="WP_093908736_2 (interacts with) WP_107115831_3" source="30050" target="29981" cy:directed="1"/>
      <edge id="30053" label="WP_093908736_2 (interacts with) WP_159688203_2" source="30050" target="30000" cy:directed="1"/>
      <edge id="30052" label="WP_093908736_2 (interacts with) WP_159770677_3" source="30050" target="29997" cy:directed="1"/>
      <edge id="30051" label="WP_093908736_2 (interacts with) WP_158686821_3" source="30050" target="29998" cy:directed="1"/>
      <edge id="30049" label="WP_073726342_2 (interacts with) WP_114054648_2" source="30038" target="29995" cy:directed="1"/>
      <edge id="30048" label="WP_073726342_2 (interacts with) WP_018960901_2" source="30038" target="29993" cy:directed="1"/>
      <edge id="30047" label="WP_073726342_2 (interacts with) WP_096622718_4" source="30038" target="30012" cy:directed="1"/>
      <edge id="30046" label="WP_073726342_2 (interacts with) WP_126393842_2" source="30038" target="29987" cy:directed="1"/>
      <edge id="30045" label="WP_073726342_2 (interacts with) WP_097866484_2" source="30038" target="29985" cy:directed="1"/>
      <edge id="30044" label="WP_073726342_2 (interacts with) WP_159688203_2" source="30038" target="30000" cy:directed="1"/>
      <edge id="30043" label="WP_073726342_2 (interacts with) WP_124271963_2" source="30038" target="30003" cy:directed="1"/>
      <edge id="30042" label="WP_073726342_2 (interacts with) WP_107115831_3" source="30038" target="29981" cy:directed="1"/>
      <edge id="30041" label="WP_073726342_2 (interacts with) WP_141310912_2" source="30038" target="29989" cy:directed="1"/>
      <edge id="30040" label="WP_073726342_2 (interacts with) WP_159770677_3" source="30038" target="29997" cy:directed="1"/>
      <edge id="30039" label="WP_073726342_2 (interacts with) WP_158686821_3" source="30038" target="29998" cy:directed="1"/>
      <edge id="30100" label="WP_096622718_4 (interacts with) WP_018960901_2" source="30012" target="29993" cy:directed="1"/>
      <edge id="30099" label="WP_096622718_4 (interacts with) WP_126393842_2" source="30012" target="29987" cy:directed="1"/>
      <edge id="30098" label="WP_096622718_4 (interacts with) WP_051840194_5" source="30012" target="29991" cy:directed="1"/>
      <edge id="30097" label="WP_096622718_4 (interacts with) WP_031017311_1" source="30012" target="30010" cy:directed="1"/>
      <edge id="30096" label="WP_096622718_4 (interacts with) WP_097866484_2" source="30012" target="29985" cy:directed="1"/>
      <edge id="30095" label="WP_096622718_4 (interacts with) WP_044377254_1" source="30012" target="29983" cy:directed="1"/>
      <edge id="30094" label="WP_096622718_4 (interacts with) WP_120754718_2" source="30012" target="29980" cy:directed="1"/>
      <edge id="30093" label="WP_096622718_4 (interacts with) WP_107115831_3" source="30012" target="29981" cy:directed="1"/>
      <edge id="30092" label="WP_096622718_4 (interacts with) WP_124271963_2" source="30012" target="30003" cy:directed="1"/>
      <edge id="30091" label="WP_096622718_4 (interacts with) WP_141310912_2" source="30012" target="29989" cy:directed="1"/>
      <edge id="30090" label="WP_031017311_1 (interacts with) WP_018960901_2" source="30010" target="29993" cy:directed="1"/>
      <edge id="30089" label="WP_031017311_1 (interacts with) WP_051840194_5" source="30010" target="29991" cy:directed="1"/>
      <edge id="30088" label="WP_031017311_1 (interacts with) WP_126393842_2" source="30010" target="29987" cy:directed="1"/>
      <edge id="30087" label="WP_031017311_1 (interacts with) WP_097866484_2" source="30010" target="29985" cy:directed="1"/>
      <edge id="30086" label="WP_031017311_1 (interacts with) WP_044377254_1" source="30010" target="29983" cy:directed="1"/>
      <edge id="30085" label="WP_031017311_1 (interacts with) WP_120754718_2" source="30010" target="29980" cy:directed="1"/>
      <edge id="30084" label="WP_031017311_1 (interacts with) WP_141310912_2" source="30010" target="29989" cy:directed="1"/>
      <edge id="30083" label="WP_031017311_1 (interacts with) WP_124271963_2" source="30010" target="30003" cy:directed="1"/>
      <edge id="30082" label="WP_031017311_1 (interacts with) WP_107115831_3" source="30010" target="29981" cy:directed="1"/>
      <edge id="30037" label="WP_124271963_2 (interacts with) WP_114054648_2" source="30003" target="29995" cy:directed="1"/>
      <edge id="30036" label="WP_124271963_2 (interacts with) WP_018960901_2" source="30003" target="29993" cy:directed="1"/>
      <edge id="30035" label="WP_124271963_2 (interacts with) WP_051840194_5" source="30003" target="29991" cy:directed="1"/>
      <edge id="30034" label="WP_124271963_2 (interacts with) WP_120754718_2" source="30003" target="29980" cy:directed="1"/>
      <edge id="30033" label="WP_124271963_2 (interacts with) WP_141310912_2" source="30003" target="29989" cy:directed="1"/>
      <edge id="30032" label="WP_124271963_2 (interacts with) WP_126393842_2" source="30003" target="29987" cy:directed="1"/>
      <edge id="30031" label="WP_124271963_2 (interacts with) WP_097866484_2" source="30003" target="29985" cy:directed="1"/>
      <edge id="30030" label="WP_124271963_2 (interacts with) WP_044377254_1" source="30003" target="29983" cy:directed="1"/>
      <edge id="30029" label="WP_124271963_2 (interacts with) WP_107115831_3" source="30003" target="29981" cy:directed="1"/>
      <edge id="30028" label="WP_124271963_2 (interacts with) WP_159688203_2" source="30003" target="30000" cy:directed="1"/>
      <edge id="30027" label="WP_124271963_2 (interacts with) WP_158686821_3" source="30003" target="29998" cy:directed="1"/>
      <edge id="30075" label="WP_159688203_2 (interacts with) WP_114054648_2" source="30000" target="29995" cy:directed="1"/>
      <edge id="30026" label="WP_158686821_3 (interacts with) WP_125506282_1" source="29998" target="30017" cy:directed="1"/>
      <edge id="30025" label="WP_158686821_3 (interacts with) WP_114054648_2" source="29998" target="29995" cy:directed="1"/>
      <edge id="30024" label="WP_158686821_3 (interacts with) WP_018960901_2" source="29998" target="29993" cy:directed="1"/>
      <edge id="30023" label="WP_158686821_3 (interacts with) WP_126393842_2" source="29998" target="29987" cy:directed="1"/>
      <edge id="30022" label="WP_158686821_3 (interacts with) WP_097866484_2" source="29998" target="29985" cy:directed="1"/>
      <edge id="30021" label="WP_158686821_3 (interacts with) WP_120754718_2" source="29998" target="29980" cy:directed="1"/>
      <edge id="30020" label="WP_158686821_3 (interacts with) WP_159688203_2" source="29998" target="30000" cy:directed="1"/>
      <edge id="30019" label="WP_158686821_3 (interacts with) WP_141310912_2" source="29998" target="29989" cy:directed="1"/>
      <edge id="30018" label="WP_159770677_3 (interacts with) WP_125506282_1" source="29997" target="30017" cy:directed="1"/>
      <edge id="30016" label="WP_159770677_3 (interacts with) WP_114054648_2" source="29997" target="29995" cy:directed="1"/>
      <edge id="30015" label="WP_159770677_3 (interacts with) WP_018960901_2" source="29997" target="29993" cy:directed="1"/>
      <edge id="30014" label="WP_159770677_3 (interacts with) WP_051840194_5" source="29997" target="29991" cy:directed="1"/>
      <edge id="30013" label="WP_159770677_3 (interacts with) WP_096622718_4" source="29997" target="30012" cy:directed="1"/>
      <edge id="30011" label="WP_159770677_3 (interacts with) WP_031017311_1" source="29997" target="30010" cy:directed="1"/>
      <edge id="30009" label="WP_159770677_3 (interacts with) WP_120754718_2" source="29997" target="29980" cy:directed="1"/>
      <edge id="30008" label="WP_159770677_3 (interacts with) WP_141310912_2" source="29997" target="29989" cy:directed="1"/>
      <edge id="30007" label="WP_159770677_3 (interacts with) WP_126393842_2" source="29997" target="29987" cy:directed="1"/>
      <edge id="30006" label="WP_159770677_3 (interacts with) WP_097866484_2" source="29997" target="29985" cy:directed="1"/>
      <edge id="30005" label="WP_159770677_3 (interacts with) WP_044377254_1" source="29997" target="29983" cy:directed="1"/>
      <edge id="30004" label="WP_159770677_3 (interacts with) WP_124271963_2" source="29997" target="30003" cy:directed="1"/>
      <edge id="30002" label="WP_159770677_3 (interacts with) WP_107115831_3" source="29997" target="29981" cy:directed="1"/>
      <edge id="30001" label="WP_159770677_3 (interacts with) WP_159688203_2" source="29997" target="30000" cy:directed="1"/>
      <edge id="29999" label="WP_159770677_3 (interacts with) WP_158686821_3" source="29997" target="29998" cy:directed="1"/>
      <edge id="30112" label="WP_018960901_2 (interacts with) WP_114054648_2" source="29993" target="29995" cy:directed="1"/>
      <edge id="30111" label="WP_018960901_2 (interacts with) WP_125506282_1" source="29993" target="30017" cy:directed="1"/>
      <edge id="30110" label="WP_018960901_2 (interacts with) WP_051840194_5" source="29993" target="29991" cy:directed="1"/>
      <edge id="30109" label="WP_018960901_2 (interacts with) WP_126393842_2" source="29993" target="29987" cy:directed="1"/>
      <edge id="30108" label="WP_018960901_2 (interacts with) WP_097866484_2" source="29993" target="29985" cy:directed="1"/>
      <edge id="30107" label="WP_018960901_2 (interacts with) WP_044377254_1" source="29993" target="29983" cy:directed="1"/>
      <edge id="30106" label="WP_018960901_2 (interacts with) WP_107115831_3" source="29993" target="29981" cy:directed="1"/>
      <edge id="30105" label="WP_018960901_2 (interacts with) WP_159688203_2" source="29993" target="30000" cy:directed="1"/>
      <edge id="30069" label="WP_051840194_5 (interacts with) WP_044377254_1" source="29991" target="29983" cy:directed="1"/>
      <edge id="30140" label="WP_141310912_2 (interacts with) WP_114054648_2" source="29989" target="29995" cy:directed="1"/>
      <edge id="30139" label="WP_141310912_2 (interacts with) WP_125506282_1" source="29989" target="30017" cy:directed="1"/>
      <edge id="30138" label="WP_141310912_2 (interacts with) WP_018960901_2" source="29989" target="29993" cy:directed="1"/>
      <edge id="30137" label="WP_141310912_2 (interacts with) WP_051840194_5" source="29989" target="29991" cy:directed="1"/>
      <edge id="30136" label="WP_141310912_2 (interacts with) WP_126393842_2" source="29989" target="29987" cy:directed="1"/>
      <edge id="30135" label="WP_141310912_2 (interacts with) WP_097866484_2" source="29989" target="29985" cy:directed="1"/>
      <edge id="30134" label="WP_141310912_2 (interacts with) WP_044377254_1" source="29989" target="29983" cy:directed="1"/>
      <edge id="30133" label="WP_141310912_2 (interacts with) WP_107115831_3" source="29989" target="29981" cy:directed="1"/>
      <edge id="30132" label="WP_141310912_2 (interacts with) WP_159688203_2" source="29989" target="30000" cy:directed="1"/>
      <edge id="30081" label="WP_126393842_2 (interacts with) WP_114054648_2" source="29987" target="29995" cy:directed="1"/>
      <edge id="30080" label="WP_126393842_2 (interacts with) WP_125506282_1" source="29987" target="30017" cy:directed="1"/>
      <edge id="30079" label="WP_126393842_2 (interacts with) WP_051840194_5" source="29987" target="29991" cy:directed="1"/>
      <edge id="30078" label="WP_126393842_2 (interacts with) WP_097866484_2" source="29987" target="29985" cy:directed="1"/>
      <edge id="30077" label="WP_126393842_2 (interacts with) WP_044377254_1" source="29987" target="29983" cy:directed="1"/>
      <edge id="30076" label="WP_126393842_2 (interacts with) WP_159688203_2" source="29987" target="30000" cy:directed="1"/>
      <edge id="30074" label="WP_097866484_2 (interacts with) WP_114054648_2" source="29985" target="29995" cy:directed="1"/>
      <edge id="30073" label="WP_097866484_2 (interacts with) WP_125506282_1" source="29985" target="30017" cy:directed="1"/>
      <edge id="30072" label="WP_097866484_2 (interacts with) WP_051840194_5" source="29985" target="29991" cy:directed="1"/>
      <edge id="30071" label="WP_097866484_2 (interacts with) WP_044377254_1" source="29985" target="29983" cy:directed="1"/>
      <edge id="30070" label="WP_097866484_2 (interacts with) WP_159688203_2" source="29985" target="30000" cy:directed="1"/>
      <edge id="30104" label="WP_107115831_3 (interacts with) WP_051840194_5" source="29981" target="29991" cy:directed="1"/>
      <edge id="30103" label="WP_107115831_3 (interacts with) WP_126393842_2" source="29981" target="29987" cy:directed="1"/>
      <edge id="30102" label="WP_107115831_3 (interacts with) WP_097866484_2" source="29981" target="29985" cy:directed="1"/>
      <edge id="30101" label="WP_107115831_3 (interacts with) WP_044377254_1" source="29981" target="29983" cy:directed="1"/>
      <edge id="29996" label="WP_120754718_2 (interacts with) WP_114054648_2" source="29980" target="29995" cy:directed="1"/>
      <edge id="29994" label="WP_120754718_2 (interacts with) WP_018960901_2" source="29980" target="29993" cy:directed="1"/>
      <edge id="29992" label="WP_120754718_2 (interacts with) WP_051840194_5" source="29980" target="29991" cy:directed="1"/>
      <edge id="29990" label="WP_120754718_2 (interacts with) WP_141310912_2" source="29980" target="29989" cy:directed="1"/>
      <edge id="29988" label="WP_120754718_2 (interacts with) WP_126393842_2" source="29980" target="29987" cy:directed="1"/>
      <edge id="29986" label="WP_120754718_2 (interacts with) WP_097866484_2" source="29980" target="29985" cy:directed="1"/>
      <edge id="29984" label="WP_120754718_2 (interacts with) WP_044377254_1" source="29980" target="29983" cy:directed="1"/>
      <edge id="29982" label="WP_120754718_2 (interacts with) WP_107115831_3" source="29980" target="29981" cy:directed="1"/>
      <edge id="29979" label="WP_013190203_2 (interacts with) WP_071189061_1" source="29971" target="29850" cy:directed="1"/>
      <edge id="29978" label="WP_013190203_2 (interacts with) WP_016950446_4" source="29971" target="29862" cy:directed="1"/>
      <edge id="29977" label="WP_013190203_2 (interacts with) WP_096569967_7" source="29971" target="29922" cy:directed="1"/>
      <edge id="29976" label="WP_013190203_2 (interacts with) WP_026100063_9" source="29971" target="29896" cy:directed="1"/>
      <edge id="29975" label="WP_013190203_2 (interacts with) WP_057178590_6" source="29971" target="29840" cy:directed="1"/>
      <edge id="29974" label="WP_013190203_2 (interacts with) WP_015212417_7" source="29971" target="29836" cy:directed="1"/>
      <edge id="29973" label="WP_013190203_2 (interacts with) TVP62740_5" source="29971" target="29838" cy:directed="1"/>
      <edge id="29972" label="WP_013190203_2 (interacts with) WP_015127932_5" source="29971" target="29832" cy:directed="1"/>
      <edge id="29958" label="WP_011321056_7 (interacts with) TAE59458_4" source="29949" target="29848" cy:directed="1"/>
      <edge id="29957" label="WP_011321056_7 (interacts with) WP_073644071_3" source="29949" target="29844" cy:directed="1"/>
      <edge id="29956" label="WP_011321056_7 (interacts with) WP_069073064_2" source="29949" target="29846" cy:directed="1"/>
      <edge id="29955" label="WP_011321056_7 (interacts with) WP_010996095_3" source="29949" target="29834" cy:directed="1"/>
      <edge id="29954" label="WP_011321056_7 (interacts with) WP_096681247_10" source="29949" target="29831" cy:directed="1"/>
      <edge id="29953" label="WP_011321056_7 (interacts with) WP_026100063_9" source="29949" target="29896" cy:directed="1"/>
      <edge id="29952" label="WP_011321056_7 (interacts with) TVP62740_5" source="29949" target="29838" cy:directed="1"/>
      <edge id="29951" label="WP_011321056_7 (interacts with) RCJ30949_12" source="29949" target="29933" cy:directed="1"/>
      <edge id="29950" label="WP_011321056_7 (interacts with) WP_015127932_5" source="29949" target="29832" cy:directed="1"/>
      <edge id="29947" label="RCJ30949_12 (interacts with) TAE59458_4" source="29933" target="29848" cy:directed="1"/>
      <edge id="29946" label="RCJ30949_12 (interacts with) WP_071189061_1" source="29933" target="29850" cy:directed="1"/>
      <edge id="29945" label="RCJ30949_12 (interacts with) WP_016950446_4" source="29933" target="29862" cy:directed="1"/>
      <edge id="29944" label="RCJ30949_12 (interacts with) WP_096536886_2" source="29933" target="29879" cy:directed="1"/>
      <edge id="29943" label="RCJ30949_12 (interacts with) WP_010996095_3" source="29933" target="29834" cy:directed="1"/>
      <edge id="29942" label="RCJ30949_12 (interacts with) WP_069073064_2" source="29933" target="29846" cy:directed="1"/>
      <edge id="29941" label="RCJ30949_12 (interacts with) WP_073644071_3" source="29933" target="29844" cy:directed="1"/>
      <edge id="29940" label="RCJ30949_12 (interacts with) RCJ14929_5" source="29933" target="29856" cy:directed="1"/>
      <edge id="29939" label="RCJ30949_12 (interacts with) WP_015210601_1" source="29933" target="29881" cy:directed="1"/>
      <edge id="29938" label="RCJ30949_12 (interacts with) WP_096681247_10" source="29933" target="29831" cy:directed="1"/>
      <edge id="29937" label="RCJ30949_12 (interacts with) WP_026100063_9" source="29933" target="29896" cy:directed="1"/>
      <edge id="29936" label="RCJ30949_12 (interacts with) WP_099071810_4" source="29933" target="29866" cy:directed="1"/>
      <edge id="29935" label="RCJ30949_12 (interacts with) TVP62740_5" source="29933" target="29838" cy:directed="1"/>
      <edge id="29934" label="RCJ30949_12 (interacts with) WP_015127932_5" source="29933" target="29832" cy:directed="1"/>
      <edge id="29932" label="WP_096569967_7 (interacts with) TAE59458_4" source="29922" target="29848" cy:directed="1"/>
      <edge id="29931" label="WP_096569967_7 (interacts with) WP_071189061_1" source="29922" target="29850" cy:directed="1"/>
      <edge id="29930" label="WP_096569967_7 (interacts with) WP_016950446_4" source="29922" target="29862" cy:directed="1"/>
      <edge id="29929" label="WP_096569967_7 (interacts with) WP_015212417_7" source="29922" target="29836" cy:directed="1"/>
      <edge id="29928" label="WP_096569967_7 (interacts with) WP_015210601_1" source="29922" target="29881" cy:directed="1"/>
      <edge id="29927" label="WP_096569967_7 (interacts with) CEJ45116_4" source="29922" target="29842" cy:directed="1"/>
      <edge id="29926" label="WP_096569967_7 (interacts with) WP_026100063_9" source="29922" target="29896" cy:directed="1"/>
      <edge id="29925" label="WP_096569967_7 (interacts with) WP_057178590_6" source="29922" target="29840" cy:directed="1"/>
      <edge id="29924" label="WP_096569967_7 (interacts with) TVP62740_5" source="29922" target="29838" cy:directed="1"/>
      <edge id="29923" label="WP_096569967_7 (interacts with) WP_015127932_5" source="29922" target="29832" cy:directed="1"/>
      <edge id="29911" label="WP_026100063_9 (interacts with) WP_016950446_4" source="29896" target="29862" cy:directed="1"/>
      <edge id="29910" label="WP_026100063_9 (interacts with) WP_010996095_3" source="29896" target="29834" cy:directed="1"/>
      <edge id="29909" label="WP_026100063_9 (interacts with) WP_069073064_2" source="29896" target="29846" cy:directed="1"/>
      <edge id="29908" label="WP_026100063_9 (interacts with) RCJ14929_5" source="29896" target="29856" cy:directed="1"/>
      <edge id="29907" label="WP_026100063_9 (interacts with) CEJ45116_4" source="29896" target="29842" cy:directed="1"/>
      <edge id="29906" label="WP_026100063_9 (interacts with) WP_099071810_4" source="29896" target="29866" cy:directed="1"/>
      <edge id="29905" label="WP_026100063_9 (interacts with) WP_071189061_1" source="29896" target="29850" cy:directed="1"/>
      <edge id="29904" label="WP_026100063_9 (interacts with) WP_096536886_2" source="29896" target="29879" cy:directed="1"/>
      <edge id="29903" label="WP_026100063_9 (interacts with) WP_073644071_3" source="29896" target="29844" cy:directed="1"/>
      <edge id="29902" label="WP_026100063_9 (interacts with) WP_015212417_7" source="29896" target="29836" cy:directed="1"/>
      <edge id="29901" label="WP_026100063_9 (interacts with) WP_015210601_1" source="29896" target="29881" cy:directed="1"/>
      <edge id="29900" label="WP_026100063_9 (interacts with) WP_096681247_10" source="29896" target="29831" cy:directed="1"/>
      <edge id="29899" label="WP_026100063_9 (interacts with) WP_138499068_3" source="29896" target="29854" cy:directed="1"/>
      <edge id="29898" label="WP_026100063_9 (interacts with) TVP62740_5" source="29896" target="29838" cy:directed="1"/>
      <edge id="29897" label="WP_026100063_9 (interacts with) WP_015127932_5" source="29896" target="29832" cy:directed="1"/>
      <edge id="29893" label="WP_015210601_1 (interacts with) WP_071189061_1" source="29881" target="29850" cy:directed="1"/>
      <edge id="29892" label="WP_015210601_1 (interacts with) WP_096536886_2" source="29881" target="29879" cy:directed="1"/>
      <edge id="29891" label="WP_015210601_1 (interacts with) WP_016950446_4" source="29881" target="29862" cy:directed="1"/>
      <edge id="29890" label="WP_015210601_1 (interacts with) WP_069073064_2" source="29881" target="29846" cy:directed="1"/>
      <edge id="29889" label="WP_015210601_1 (interacts with) WP_073644071_3" source="29881" target="29844" cy:directed="1"/>
      <edge id="29888" label="WP_015210601_1 (interacts with) WP_010996095_3" source="29881" target="29834" cy:directed="1"/>
      <edge id="29887" label="WP_015210601_1 (interacts with) WP_015212417_7" source="29881" target="29836" cy:directed="1"/>
      <edge id="29886" label="WP_015210601_1 (interacts with) RCJ14929_5" source="29881" target="29856" cy:directed="1"/>
      <edge id="29885" label="WP_015210601_1 (interacts with) WP_099071810_4" source="29881" target="29866" cy:directed="1"/>
      <edge id="29884" label="WP_015210601_1 (interacts with) WP_138499068_3" source="29881" target="29854" cy:directed="1"/>
      <edge id="29883" label="WP_015210601_1 (interacts with) TVP62740_5" source="29881" target="29838" cy:directed="1"/>
      <edge id="29882" label="WP_015210601_1 (interacts with) WP_015127932_5" source="29881" target="29832" cy:directed="1"/>
      <edge id="29895" label="WP_096536886_2 (interacts with) WP_069073064_2" source="29879" target="29846" cy:directed="1"/>
      <edge id="29894" label="WP_096536886_2 (interacts with) WP_073644071_3" source="29879" target="29844" cy:directed="1"/>
      <edge id="29917" label="WP_099071810_4 (interacts with) WP_096536886_2" source="29866" target="29879" cy:directed="1"/>
      <edge id="29916" label="WP_099071810_4 (interacts with) WP_069073064_2" source="29866" target="29846" cy:directed="1"/>
      <edge id="29915" label="WP_099071810_4 (interacts with) WP_073644071_3" source="29866" target="29844" cy:directed="1"/>
      <edge id="29914" label="WP_099071810_4 (interacts with) WP_138499068_3" source="29866" target="29854" cy:directed="1"/>
      <edge id="29913" label="WP_099071810_4 (interacts with) WP_015127932_5" source="29866" target="29832" cy:directed="1"/>
      <edge id="29872" label="WP_016950446_4 (interacts with) TAE59458_4" source="29862" target="29848" cy:directed="1"/>
      <edge id="29871" label="WP_016950446_4 (interacts with) WP_071189061_1" source="29862" target="29850" cy:directed="1"/>
      <edge id="29870" label="WP_016950446_4 (interacts with) WP_073644071_3" source="29862" target="29844" cy:directed="1"/>
      <edge id="29869" label="WP_016950446_4 (interacts with) WP_069073064_2" source="29862" target="29846" cy:directed="1"/>
      <edge id="29868" label="WP_016950446_4 (interacts with) WP_015212417_7" source="29862" target="29836" cy:directed="1"/>
      <edge id="29867" label="WP_016950446_4 (interacts with) WP_099071810_4" source="29862" target="29866" cy:directed="1"/>
      <edge id="29865" label="WP_016950446_4 (interacts with) WP_057178590_6" source="29862" target="29840" cy:directed="1"/>
      <edge id="29864" label="WP_016950446_4 (interacts with) TVP62740_5" source="29862" target="29838" cy:directed="1"/>
      <edge id="29863" label="WP_016950446_4 (interacts with) WP_015127932_5" source="29862" target="29832" cy:directed="1"/>
      <edge id="29970" label="RCJ14929_5 (interacts with) WP_096536886_2" source="29856" target="29879" cy:directed="1"/>
      <edge id="29969" label="RCJ14929_5 (interacts with) WP_069073064_2" source="29856" target="29846" cy:directed="1"/>
      <edge id="29968" label="RCJ14929_5 (interacts with) WP_073644071_3" source="29856" target="29844" cy:directed="1"/>
      <edge id="29967" label="RCJ14929_5 (interacts with) WP_099071810_4" source="29856" target="29866" cy:directed="1"/>
      <edge id="29966" label="RCJ14929_5 (interacts with) WP_138499068_3" source="29856" target="29854" cy:directed="1"/>
      <edge id="29965" label="RCJ14929_5 (interacts with) WP_015127932_5" source="29856" target="29832" cy:directed="1"/>
      <edge id="29880" label="WP_138499068_3 (interacts with) WP_096536886_2" source="29854" target="29879" cy:directed="1"/>
      <edge id="29878" label="WP_138499068_3 (interacts with) WP_073644071_3" source="29854" target="29844" cy:directed="1"/>
      <edge id="29877" label="WP_138499068_3 (interacts with) WP_069073064_2" source="29854" target="29846" cy:directed="1"/>
      <edge id="29876" label="WP_138499068_3 (interacts with) WP_015127932_5" source="29854" target="29832" cy:directed="1"/>
      <edge id="29861" label="WP_071189061_1 (interacts with) TAE59458_4" source="29850" target="29848" cy:directed="1"/>
      <edge id="29860" label="WP_071189061_1 (interacts with) WP_073644071_3" source="29850" target="29844" cy:directed="1"/>
      <edge id="29859" label="WP_071189061_1 (interacts with) WP_069073064_2" source="29850" target="29846" cy:directed="1"/>
      <edge id="29858" label="WP_071189061_1 (interacts with) WP_015212417_7" source="29850" target="29836" cy:directed="1"/>
      <edge id="29857" label="WP_071189061_1 (interacts with) RCJ14929_5" source="29850" target="29856" cy:directed="1"/>
      <edge id="29855" label="WP_071189061_1 (interacts with) WP_138499068_3" source="29850" target="29854" cy:directed="1"/>
      <edge id="29853" label="WP_071189061_1 (interacts with) WP_057178590_6" source="29850" target="29840" cy:directed="1"/>
      <edge id="29852" label="WP_071189061_1 (interacts with) TVP62740_5" source="29850" target="29838" cy:directed="1"/>
      <edge id="29851" label="WP_071189061_1 (interacts with) WP_015127932_5" source="29850" target="29832" cy:directed="1"/>
      <edge id="29948" label="TAE59458_4 (interacts with) TVP62740_5" source="29848" target="29838" cy:directed="1"/>
      <edge id="29875" label="WP_073644071_3 (interacts with) WP_010996095_3" source="29844" target="29834" cy:directed="1"/>
      <edge id="29874" label="WP_073644071_3 (interacts with) WP_069073064_2" source="29844" target="29846" cy:directed="1"/>
      <edge id="29873" label="WP_057178590_6 (interacts with) CEJ45116_4" source="29840" target="29842" cy:directed="1"/>
      <edge id="29921" label="TVP62740_5 (interacts with) WP_073644071_3" source="29838" target="29844" cy:directed="1"/>
      <edge id="29920" label="TVP62740_5 (interacts with) WP_010996095_3" source="29838" target="29834" cy:directed="1"/>
      <edge id="29919" label="TVP62740_5 (interacts with) WP_069073064_2" source="29838" target="29846" cy:directed="1"/>
      <edge id="29918" label="TVP62740_5 (interacts with) CEJ45116_4" source="29838" target="29842" cy:directed="1"/>
      <edge id="29849" label="WP_015212417_7 (interacts with) TAE59458_4" source="29836" target="29848" cy:directed="1"/>
      <edge id="29847" label="WP_015212417_7 (interacts with) WP_069073064_2" source="29836" target="29846" cy:directed="1"/>
      <edge id="29845" label="WP_015212417_7 (interacts with) WP_073644071_3" source="29836" target="29844" cy:directed="1"/>
      <edge id="29843" label="WP_015212417_7 (interacts with) CEJ45116_4" source="29836" target="29842" cy:directed="1"/>
      <edge id="29841" label="WP_015212417_7 (interacts with) WP_057178590_6" source="29836" target="29840" cy:directed="1"/>
      <edge id="29839" label="WP_015212417_7 (interacts with) TVP62740_5" source="29836" target="29838" cy:directed="1"/>
      <edge id="29837" label="WP_015212417_7 (interacts with) WP_015127932_5" source="29836" target="29832" cy:directed="1"/>
      <edge id="29912" label="WP_010996095_3 (interacts with) WP_069073064_2" source="29834" target="29846" cy:directed="1"/>
      <edge id="29964" label="WP_015127932_5 (interacts with) WP_069073064_2" source="29832" target="29846" cy:directed="1"/>
      <edge id="29963" label="WP_015127932_5 (interacts with) WP_010996095_3" source="29832" target="29834" cy:directed="1"/>
      <edge id="29962" label="WP_015127932_5 (interacts with) CEJ45116_4" source="29832" target="29842" cy:directed="1"/>
      <edge id="29961" label="WP_015127932_5 (interacts with) WP_096536886_2" source="29832" target="29879" cy:directed="1"/>
      <edge id="29960" label="WP_015127932_5 (interacts with) WP_073644071_3" source="29832" target="29844" cy:directed="1"/>
      <edge id="29959" label="WP_015127932_5 (interacts with) TVP62740_5" source="29832" target="29838" cy:directed="1"/>
      <edge id="29835" label="WP_096681247_10 (interacts with) WP_010996095_3" source="29831" target="29834" cy:directed="1"/>
      <edge id="29833" label="WP_096681247_10 (interacts with) WP_015127932_5" source="29831" target="29832" cy:directed="1"/>
      <edge id="29769" label="WP_168643398_2 (interacts with) AVH79662_1" source="29742" target="29472" cy:directed="1"/>
      <edge id="29768" label="WP_168643398_2 (interacts with) AVH79456_2" source="29742" target="29670" cy:directed="1"/>
      <edge id="29767" label="WP_168643398_2 (interacts with) WP_087592205_4" source="29742" target="29470" cy:directed="1"/>
      <edge id="29766" label="WP_168643398_2 (interacts with) WP_124970176_1" source="29742" target="29468" cy:directed="1"/>
      <edge id="29765" label="WP_168643398_2 (interacts with) WP_087592205_1" source="29742" target="29515" cy:directed="1"/>
      <edge id="29764" label="WP_168643398_2 (interacts with) WP_168643398_1" source="29742" target="29466" cy:directed="1"/>
      <edge id="29763" label="WP_168643398_2 (interacts with) WP_096589596_2" source="29742" target="29464" cy:directed="1"/>
      <edge id="29762" label="WP_168643398_2 (interacts with) WP_012597836_1" source="29742" target="29462" cy:directed="1"/>
      <edge id="29761" label="WP_168643398_2 (interacts with) AVH79628_1" source="29742" target="29460" cy:directed="1"/>
      <edge id="29760" label="WP_168643398_2 (interacts with) AVH79456_1" source="29742" target="29458" cy:directed="1"/>
      <edge id="29759" label="WP_168643398_2 (interacts with) WP_012595952_2" source="29742" target="29493" cy:directed="1"/>
      <edge id="29758" label="WP_168643398_2 (interacts with) WP_096679519_1" source="29742" target="29456" cy:directed="1"/>
      <edge id="29757" label="WP_168643398_2 (interacts with) WP_012409787_1" source="29742" target="29433" cy:directed="1"/>
      <edge id="29756" label="WP_168643398_2 (interacts with) WP_015216084_2" source="29742" target="29452" cy:directed="1"/>
      <edge id="29755" label="WP_168643398_2 (interacts with) AVH79607_1" source="29742" target="29454" cy:directed="1"/>
      <edge id="29754" label="WP_168643398_2 (interacts with) WP_015216084_1" source="29742" target="29450" cy:directed="1"/>
      <edge id="29753" label="WP_168643398_2 (interacts with) WP_167721203_1" source="29742" target="29628" cy:directed="1"/>
      <edge id="29752" label="WP_168643398_2 (interacts with) WP_096589596_1" source="29742" target="29448" cy:directed="1"/>
      <edge id="29751" label="WP_168643398_2 (interacts with) WP_012595952_1" source="29742" target="29446" cy:directed="1"/>
      <edge id="29750" label="WP_168643398_2 (interacts with) WP_103138325_1" source="29742" target="29603" cy:directed="1"/>
      <edge id="29749" label="WP_168643398_2 (interacts with) WP_086760950_1" source="29742" target="29444" cy:directed="1"/>
      <edge id="29748" label="WP_168643398_2 (interacts with) TVP63782_2" source="29742" target="29548" cy:directed="1"/>
      <edge id="29747" label="WP_168643398_2 (interacts with) TVP63782_1" source="29742" target="29442" cy:directed="1"/>
      <edge id="29746" label="WP_168643398_2 (interacts with) WP_012409787_8" source="29742" target="29440" cy:directed="1"/>
      <edge id="29745" label="WP_168643398_2 (interacts with) WP_087592205_2" source="29742" target="29438" cy:directed="1"/>
      <edge id="29744" label="WP_168643398_2 (interacts with) WP_167721203_5" source="29742" target="29436" cy:directed="1"/>
      <edge id="29743" label="WP_168643398_2 (interacts with) WP_086760950_2" source="29742" target="29434" cy:directed="1"/>
      <edge id="29695" label="AVH79456_2 (interacts with) AVH79662_1" source="29670" target="29472" cy:directed="1"/>
      <edge id="29694" label="AVH79456_2 (interacts with) WP_087592205_4" source="29670" target="29470" cy:directed="1"/>
      <edge id="29693" label="AVH79456_2 (interacts with) WP_124970176_1" source="29670" target="29468" cy:directed="1"/>
      <edge id="29692" label="AVH79456_2 (interacts with) WP_168643398_1" source="29670" target="29466" cy:directed="1"/>
      <edge id="29691" label="AVH79456_2 (interacts with) WP_096589596_2" source="29670" target="29464" cy:directed="1"/>
      <edge id="29690" label="AVH79456_2 (interacts with) WP_087592205_1" source="29670" target="29515" cy:directed="1"/>
      <edge id="29689" label="AVH79456_2 (interacts with) AVH79628_1" source="29670" target="29460" cy:directed="1"/>
      <edge id="29688" label="AVH79456_2 (interacts with) AVH79456_1" source="29670" target="29458" cy:directed="1"/>
      <edge id="29687" label="AVH79456_2 (interacts with) WP_012595952_2" source="29670" target="29493" cy:directed="1"/>
      <edge id="29686" label="AVH79456_2 (interacts with) WP_096679519_1" source="29670" target="29456" cy:directed="1"/>
      <edge id="29685" label="AVH79456_2 (interacts with) WP_015216084_2" source="29670" target="29452" cy:directed="1"/>
      <edge id="29684" label="AVH79456_2 (interacts with) AVH79607_1" source="29670" target="29454" cy:directed="1"/>
      <edge id="29683" label="AVH79456_2 (interacts with) WP_012409787_1" source="29670" target="29433" cy:directed="1"/>
      <edge id="29682" label="AVH79456_2 (interacts with) WP_015216084_1" source="29670" target="29450" cy:directed="1"/>
      <edge id="29681" label="AVH79456_2 (interacts with) WP_167721203_1" source="29670" target="29628" cy:directed="1"/>
      <edge id="29680" label="AVH79456_2 (interacts with) WP_096589596_1" source="29670" target="29448" cy:directed="1"/>
      <edge id="29679" label="AVH79456_2 (interacts with) WP_103138325_1" source="29670" target="29603" cy:directed="1"/>
      <edge id="29678" label="AVH79456_2 (interacts with) WP_012595952_1" source="29670" target="29446" cy:directed="1"/>
      <edge id="29677" label="AVH79456_2 (interacts with) WP_086760950_1" source="29670" target="29444" cy:directed="1"/>
      <edge id="29676" label="AVH79456_2 (interacts with) TVP63782_2" source="29670" target="29548" cy:directed="1"/>
      <edge id="29675" label="AVH79456_2 (interacts with) TVP63782_1" source="29670" target="29442" cy:directed="1"/>
      <edge id="29674" label="AVH79456_2 (interacts with) WP_012409787_8" source="29670" target="29440" cy:directed="1"/>
      <edge id="29673" label="AVH79456_2 (interacts with) WP_087592205_2" source="29670" target="29438" cy:directed="1"/>
      <edge id="29672" label="AVH79456_2 (interacts with) WP_167721203_5" source="29670" target="29436" cy:directed="1"/>
      <edge id="29671" label="AVH79456_2 (interacts with) WP_086760950_2" source="29670" target="29434" cy:directed="1"/>
      <edge id="29653" label="WP_167721203_1 (interacts with) AVH79662_1" source="29628" target="29472" cy:directed="1"/>
      <edge id="29652" label="WP_167721203_1 (interacts with) WP_087592205_4" source="29628" target="29470" cy:directed="1"/>
      <edge id="29651" label="WP_167721203_1 (interacts with) WP_124970176_1" source="29628" target="29468" cy:directed="1"/>
      <edge id="29650" label="WP_167721203_1 (interacts with) WP_096589596_2" source="29628" target="29464" cy:directed="1"/>
      <edge id="29649" label="WP_167721203_1 (interacts with) WP_087592205_1" source="29628" target="29515" cy:directed="1"/>
      <edge id="29648" label="WP_167721203_1 (interacts with) WP_168643398_1" source="29628" target="29466" cy:directed="1"/>
      <edge id="29647" label="WP_167721203_1 (interacts with) WP_012597836_1" source="29628" target="29462" cy:directed="1"/>
      <edge id="29646" label="WP_167721203_1 (interacts with) AVH79628_1" source="29628" target="29460" cy:directed="1"/>
      <edge id="29645" label="WP_167721203_1 (interacts with) AVH79456_1" source="29628" target="29458" cy:directed="1"/>
      <edge id="29644" label="WP_167721203_1 (interacts with) WP_012595952_2" source="29628" target="29493" cy:directed="1"/>
      <edge id="29643" label="WP_167721203_1 (interacts with) WP_096679519_1" source="29628" target="29456" cy:directed="1"/>
      <edge id="29642" label="WP_167721203_1 (interacts with) WP_012409787_1" source="29628" target="29433" cy:directed="1"/>
      <edge id="29641" label="WP_167721203_1 (interacts with) AVH79607_1" source="29628" target="29454" cy:directed="1"/>
      <edge id="29640" label="WP_167721203_1 (interacts with) WP_015216084_2" source="29628" target="29452" cy:directed="1"/>
      <edge id="29639" label="WP_167721203_1 (interacts with) WP_015216084_1" source="29628" target="29450" cy:directed="1"/>
      <edge id="29638" label="WP_167721203_1 (interacts with) WP_096589596_1" source="29628" target="29448" cy:directed="1"/>
      <edge id="29637" label="WP_167721203_1 (interacts with) WP_103138325_1" source="29628" target="29603" cy:directed="1"/>
      <edge id="29636" label="WP_167721203_1 (interacts with) WP_012595952_1" source="29628" target="29446" cy:directed="1"/>
      <edge id="29635" label="WP_167721203_1 (interacts with) WP_086760950_1" source="29628" target="29444" cy:directed="1"/>
      <edge id="29634" label="WP_167721203_1 (interacts with) TVP63782_2" source="29628" target="29548" cy:directed="1"/>
      <edge id="29633" label="WP_167721203_1 (interacts with) TVP63782_1" source="29628" target="29442" cy:directed="1"/>
      <edge id="29632" label="WP_167721203_1 (interacts with) WP_012409787_8" source="29628" target="29440" cy:directed="1"/>
      <edge id="29631" label="WP_167721203_1 (interacts with) WP_087592205_2" source="29628" target="29438" cy:directed="1"/>
      <edge id="29630" label="WP_167721203_1 (interacts with) WP_167721203_5" source="29628" target="29436" cy:directed="1"/>
      <edge id="29629" label="WP_167721203_1 (interacts with) WP_086760950_2" source="29628" target="29434" cy:directed="1"/>
      <edge id="29627" label="WP_103138325_1 (interacts with) AVH79662_1" source="29603" target="29472" cy:directed="1"/>
      <edge id="29626" label="WP_103138325_1 (interacts with) WP_087592205_4" source="29603" target="29470" cy:directed="1"/>
      <edge id="29625" label="WP_103138325_1 (interacts with) WP_124970176_1" source="29603" target="29468" cy:directed="1"/>
      <edge id="29624" label="WP_103138325_1 (interacts with) WP_096589596_2" source="29603" target="29464" cy:directed="1"/>
      <edge id="29623" label="WP_103138325_1 (interacts with) WP_168643398_1" source="29603" target="29466" cy:directed="1"/>
      <edge id="29622" label="WP_103138325_1 (interacts with) WP_087592205_1" source="29603" target="29515" cy:directed="1"/>
      <edge id="29621" label="WP_103138325_1 (interacts with) WP_012597836_1" source="29603" target="29462" cy:directed="1"/>
      <edge id="29620" label="WP_103138325_1 (interacts with) AVH79628_1" source="29603" target="29460" cy:directed="1"/>
      <edge id="29619" label="WP_103138325_1 (interacts with) AVH79456_1" source="29603" target="29458" cy:directed="1"/>
      <edge id="29618" label="WP_103138325_1 (interacts with) WP_012595952_2" source="29603" target="29493" cy:directed="1"/>
      <edge id="29617" label="WP_103138325_1 (interacts with) WP_096679519_1" source="29603" target="29456" cy:directed="1"/>
      <edge id="29616" label="WP_103138325_1 (interacts with) WP_012409787_1" source="29603" target="29433" cy:directed="1"/>
      <edge id="29615" label="WP_103138325_1 (interacts with) AVH79607_1" source="29603" target="29454" cy:directed="1"/>
      <edge id="29614" label="WP_103138325_1 (interacts with) WP_015216084_2" source="29603" target="29452" cy:directed="1"/>
      <edge id="29613" label="WP_103138325_1 (interacts with) WP_015216084_1" source="29603" target="29450" cy:directed="1"/>
      <edge id="29612" label="WP_103138325_1 (interacts with) WP_096589596_1" source="29603" target="29448" cy:directed="1"/>
      <edge id="29611" label="WP_103138325_1 (interacts with) WP_012595952_1" source="29603" target="29446" cy:directed="1"/>
      <edge id="29610" label="WP_103138325_1 (interacts with) WP_086760950_1" source="29603" target="29444" cy:directed="1"/>
      <edge id="29609" label="WP_103138325_1 (interacts with) TVP63782_2" source="29603" target="29548" cy:directed="1"/>
      <edge id="29608" label="WP_103138325_1 (interacts with) TVP63782_1" source="29603" target="29442" cy:directed="1"/>
      <edge id="29607" label="WP_103138325_1 (interacts with) WP_012409787_8" source="29603" target="29440" cy:directed="1"/>
      <edge id="29606" label="WP_103138325_1 (interacts with) WP_087592205_2" source="29603" target="29438" cy:directed="1"/>
      <edge id="29605" label="WP_103138325_1 (interacts with) WP_167721203_5" source="29603" target="29436" cy:directed="1"/>
      <edge id="29604" label="WP_103138325_1 (interacts with) WP_086760950_2" source="29603" target="29434" cy:directed="1"/>
      <edge id="29571" label="TVP63782_2 (interacts with) AVH79662_1" source="29548" target="29472" cy:directed="1"/>
      <edge id="29570" label="TVP63782_2 (interacts with) WP_087592205_4" source="29548" target="29470" cy:directed="1"/>
      <edge id="29569" label="TVP63782_2 (interacts with) WP_124970176_1" source="29548" target="29468" cy:directed="1"/>
      <edge id="29568" label="TVP63782_2 (interacts with) WP_096589596_2" source="29548" target="29464" cy:directed="1"/>
      <edge id="29567" label="TVP63782_2 (interacts with) WP_087592205_1" source="29548" target="29515" cy:directed="1"/>
      <edge id="29566" label="TVP63782_2 (interacts with) WP_168643398_1" source="29548" target="29466" cy:directed="1"/>
      <edge id="29565" label="TVP63782_2 (interacts with) WP_012597836_1" source="29548" target="29462" cy:directed="1"/>
      <edge id="29564" label="TVP63782_2 (interacts with) AVH79628_1" source="29548" target="29460" cy:directed="1"/>
      <edge id="29563" label="TVP63782_2 (interacts with) AVH79456_1" source="29548" target="29458" cy:directed="1"/>
      <edge id="29562" label="TVP63782_2 (interacts with) WP_012595952_2" source="29548" target="29493" cy:directed="1"/>
      <edge id="29561" label="TVP63782_2 (interacts with) WP_096679519_1" source="29548" target="29456" cy:directed="1"/>
      <edge id="29560" label="TVP63782_2 (interacts with) WP_012409787_1" source="29548" target="29433" cy:directed="1"/>
      <edge id="29559" label="TVP63782_2 (interacts with) AVH79607_1" source="29548" target="29454" cy:directed="1"/>
      <edge id="29558" label="TVP63782_2 (interacts with) WP_015216084_2" source="29548" target="29452" cy:directed="1"/>
      <edge id="29557" label="TVP63782_2 (interacts with) WP_015216084_1" source="29548" target="29450" cy:directed="1"/>
      <edge id="29556" label="TVP63782_2 (interacts with) WP_096589596_1" source="29548" target="29448" cy:directed="1"/>
      <edge id="29555" label="TVP63782_2 (interacts with) WP_012595952_1" source="29548" target="29446" cy:directed="1"/>
      <edge id="29554" label="TVP63782_2 (interacts with) WP_086760950_1" source="29548" target="29444" cy:directed="1"/>
      <edge id="29553" label="TVP63782_2 (interacts with) TVP63782_1" source="29548" target="29442" cy:directed="1"/>
      <edge id="29552" label="TVP63782_2 (interacts with) WP_012409787_8" source="29548" target="29440" cy:directed="1"/>
      <edge id="29551" label="TVP63782_2 (interacts with) WP_087592205_2" source="29548" target="29438" cy:directed="1"/>
      <edge id="29550" label="TVP63782_2 (interacts with) WP_167721203_5" source="29548" target="29436" cy:directed="1"/>
      <edge id="29549" label="TVP63782_2 (interacts with) WP_086760950_2" source="29548" target="29434" cy:directed="1"/>
      <edge id="29536" label="WP_087592205_1 (interacts with) AVH79662_1" source="29515" target="29472" cy:directed="1"/>
      <edge id="29535" label="WP_087592205_1 (interacts with) WP_087592205_4" source="29515" target="29470" cy:directed="1"/>
      <edge id="29534" label="WP_087592205_1 (interacts with) WP_124970176_1" source="29515" target="29468" cy:directed="1"/>
      <edge id="29533" label="WP_087592205_1 (interacts with) WP_096589596_2" source="29515" target="29464" cy:directed="1"/>
      <edge id="29532" label="WP_087592205_1 (interacts with) WP_168643398_1" source="29515" target="29466" cy:directed="1"/>
      <edge id="29531" label="WP_087592205_1 (interacts with) WP_012597836_1" source="29515" target="29462" cy:directed="1"/>
      <edge id="29530" label="WP_087592205_1 (interacts with) AVH79628_1" source="29515" target="29460" cy:directed="1"/>
      <edge id="29529" label="WP_087592205_1 (interacts with) AVH79456_1" source="29515" target="29458" cy:directed="1"/>
      <edge id="29528" label="WP_087592205_1 (interacts with) WP_012595952_2" source="29515" target="29493" cy:directed="1"/>
      <edge id="29527" label="WP_087592205_1 (interacts with) WP_096679519_1" source="29515" target="29456" cy:directed="1"/>
      <edge id="29526" label="WP_087592205_1 (interacts with) WP_012409787_1" source="29515" target="29433" cy:directed="1"/>
      <edge id="29525" label="WP_087592205_1 (interacts with) AVH79607_1" source="29515" target="29454" cy:directed="1"/>
      <edge id="29524" label="WP_087592205_1 (interacts with) WP_015216084_2" source="29515" target="29452" cy:directed="1"/>
      <edge id="29523" label="WP_087592205_1 (interacts with) WP_015216084_1" source="29515" target="29450" cy:directed="1"/>
      <edge id="29522" label="WP_087592205_1 (interacts with) WP_096589596_1" source="29515" target="29448" cy:directed="1"/>
      <edge id="29521" label="WP_087592205_1 (interacts with) WP_012595952_1" source="29515" target="29446" cy:directed="1"/>
      <edge id="29520" label="WP_087592205_1 (interacts with) WP_086760950_1" source="29515" target="29444" cy:directed="1"/>
      <edge id="29519" label="WP_087592205_1 (interacts with) TVP63782_1" source="29515" target="29442" cy:directed="1"/>
      <edge id="29518" label="WP_087592205_1 (interacts with) WP_087592205_2" source="29515" target="29438" cy:directed="1"/>
      <edge id="29517" label="WP_087592205_1 (interacts with) WP_167721203_5" source="29515" target="29436" cy:directed="1"/>
      <edge id="29516" label="WP_087592205_1 (interacts with) WP_086760950_2" source="29515" target="29434" cy:directed="1"/>
      <edge id="29514" label="WP_012595952_2 (interacts with) AVH79662_1" source="29493" target="29472" cy:directed="1"/>
      <edge id="29513" label="WP_012595952_2 (interacts with) WP_087592205_4" source="29493" target="29470" cy:directed="1"/>
      <edge id="29512" label="WP_012595952_2 (interacts with) WP_124970176_1" source="29493" target="29468" cy:directed="1"/>
      <edge id="29511" label="WP_012595952_2 (interacts with) WP_096589596_2" source="29493" target="29464" cy:directed="1"/>
      <edge id="29510" label="WP_012595952_2 (interacts with) WP_168643398_1" source="29493" target="29466" cy:directed="1"/>
      <edge id="29509" label="WP_012595952_2 (interacts with) WP_012597836_1" source="29493" target="29462" cy:directed="1"/>
      <edge id="29508" label="WP_012595952_2 (interacts with) AVH79628_1" source="29493" target="29460" cy:directed="1"/>
      <edge id="29507" label="WP_012595952_2 (interacts with) AVH79456_1" source="29493" target="29458" cy:directed="1"/>
      <edge id="29506" label="WP_012595952_2 (interacts with) WP_096679519_1" source="29493" target="29456" cy:directed="1"/>
      <edge id="29505" label="WP_012595952_2 (interacts with) AVH79607_1" source="29493" target="29454" cy:directed="1"/>
      <edge id="29504" label="WP_012595952_2 (interacts with) WP_015216084_2" source="29493" target="29452" cy:directed="1"/>
      <edge id="29503" label="WP_012595952_2 (interacts with) WP_012409787_1" source="29493" target="29433" cy:directed="1"/>
      <edge id="29502" label="WP_012595952_2 (interacts with) WP_015216084_1" source="29493" target="29450" cy:directed="1"/>
      <edge id="29501" label="WP_012595952_2 (interacts with) WP_096589596_1" source="29493" target="29448" cy:directed="1"/>
      <edge id="29500" label="WP_012595952_2 (interacts with) WP_012595952_1" source="29493" target="29446" cy:directed="1"/>
      <edge id="29499" label="WP_012595952_2 (interacts with) WP_086760950_1" source="29493" target="29444" cy:directed="1"/>
      <edge id="29498" label="WP_012595952_2 (interacts with) TVP63782_1" source="29493" target="29442" cy:directed="1"/>
      <edge id="29497" label="WP_012595952_2 (interacts with) WP_012409787_8" source="29493" target="29440" cy:directed="1"/>
      <edge id="29496" label="WP_012595952_2 (interacts with) WP_087592205_2" source="29493" target="29438" cy:directed="1"/>
      <edge id="29495" label="WP_012595952_2 (interacts with) WP_167721203_5" source="29493" target="29436" cy:directed="1"/>
      <edge id="29494" label="WP_012595952_2 (interacts with) WP_086760950_2" source="29493" target="29434" cy:directed="1"/>
      <edge id="29482" label="AVH79662_1 (interacts with) WP_087592205_4" source="29472" target="29470" cy:directed="1"/>
      <edge id="29481" label="AVH79662_1 (interacts with) WP_012597836_1" source="29472" target="29462" cy:directed="1"/>
      <edge id="29480" label="AVH79662_1 (interacts with) WP_168643398_1" source="29472" target="29466" cy:directed="1"/>
      <edge id="29479" label="AVH79662_1 (interacts with) WP_096589596_2" source="29472" target="29464" cy:directed="1"/>
      <edge id="29478" label="AVH79662_1 (interacts with) AVH79456_1" source="29472" target="29458" cy:directed="1"/>
      <edge id="29477" label="AVH79662_1 (interacts with) WP_015216084_2" source="29472" target="29452" cy:directed="1"/>
      <edge id="29476" label="AVH79662_1 (interacts with) AVH79607_1" source="29472" target="29454" cy:directed="1"/>
      <edge id="29475" label="AVH79662_1 (interacts with) WP_012595952_1" source="29472" target="29446" cy:directed="1"/>
      <edge id="29474" label="AVH79662_1 (interacts with) TVP63782_1" source="29472" target="29442" cy:directed="1"/>
      <edge id="29666" label="WP_124970176_1 (interacts with) AVH79662_1" source="29468" target="29472" cy:directed="1"/>
      <edge id="29665" label="WP_124970176_1 (interacts with) WP_087592205_4" source="29468" target="29470" cy:directed="1"/>
      <edge id="29664" label="WP_124970176_1 (interacts with) WP_012597836_1" source="29468" target="29462" cy:directed="1"/>
      <edge id="29663" label="WP_124970176_1 (interacts with) WP_168643398_1" source="29468" target="29466" cy:directed="1"/>
      <edge id="29662" label="WP_124970176_1 (interacts with) WP_096589596_2" source="29468" target="29464" cy:directed="1"/>
      <edge id="29661" label="WP_124970176_1 (interacts with) AVH79456_1" source="29468" target="29458" cy:directed="1"/>
      <edge id="29660" label="WP_124970176_1 (interacts with) AVH79607_1" source="29468" target="29454" cy:directed="1"/>
      <edge id="29659" label="WP_124970176_1 (interacts with) WP_015216084_2" source="29468" target="29452" cy:directed="1"/>
      <edge id="29658" label="WP_124970176_1 (interacts with) WP_096589596_1" source="29468" target="29448" cy:directed="1"/>
      <edge id="29657" label="WP_124970176_1 (interacts with) WP_012595952_1" source="29468" target="29446" cy:directed="1"/>
      <edge id="29656" label="WP_124970176_1 (interacts with) TVP63782_1" source="29468" target="29442" cy:directed="1"/>
      <edge id="29655" label="WP_124970176_1 (interacts with) WP_012409787_8" source="29468" target="29440" cy:directed="1"/>
      <edge id="29654" label="WP_124970176_1 (interacts with) WP_167721203_5" source="29468" target="29436" cy:directed="1"/>
      <edge id="29492" label="WP_168643398_1 (interacts with) WP_087592205_4" source="29466" target="29470" cy:directed="1"/>
      <edge id="29669" label="WP_096589596_2 (interacts with) WP_087592205_4" source="29464" target="29470" cy:directed="1"/>
      <edge id="29668" label="WP_096589596_2 (interacts with) WP_168643398_1" source="29464" target="29466" cy:directed="1"/>
      <edge id="29667" label="WP_096589596_2 (interacts with) AVH79456_1" source="29464" target="29458" cy:directed="1"/>
      <edge id="29537" label="WP_012597836_1 (interacts with) WP_168643398_1" source="29462" target="29466" cy:directed="1"/>
      <edge id="29809" label="AVH79628_1 (interacts with) AVH79662_1" source="29460" target="29472" cy:directed="1"/>
      <edge id="29808" label="AVH79628_1 (interacts with) WP_087592205_4" source="29460" target="29470" cy:directed="1"/>
      <edge id="29807" label="AVH79628_1 (interacts with) WP_124970176_1" source="29460" target="29468" cy:directed="1"/>
      <edge id="29806" label="AVH79628_1 (interacts with) WP_168643398_1" source="29460" target="29466" cy:directed="1"/>
      <edge id="29805" label="AVH79628_1 (interacts with) WP_096589596_2" source="29460" target="29464" cy:directed="1"/>
      <edge id="29804" label="AVH79628_1 (interacts with) WP_012597836_1" source="29460" target="29462" cy:directed="1"/>
      <edge id="29803" label="AVH79628_1 (interacts with) AVH79456_1" source="29460" target="29458" cy:directed="1"/>
      <edge id="29802" label="AVH79628_1 (interacts with) WP_096679519_1" source="29460" target="29456" cy:directed="1"/>
      <edge id="29801" label="AVH79628_1 (interacts with) AVH79607_1" source="29460" target="29454" cy:directed="1"/>
      <edge id="29800" label="AVH79628_1 (interacts with) WP_015216084_2" source="29460" target="29452" cy:directed="1"/>
      <edge id="29799" label="AVH79628_1 (interacts with) WP_015216084_1" source="29460" target="29450" cy:directed="1"/>
      <edge id="29798" label="AVH79628_1 (interacts with) WP_096589596_1" source="29460" target="29448" cy:directed="1"/>
      <edge id="29797" label="AVH79628_1 (interacts with) WP_012595952_1" source="29460" target="29446" cy:directed="1"/>
      <edge id="29796" label="AVH79628_1 (interacts with) WP_086760950_1" source="29460" target="29444" cy:directed="1"/>
      <edge id="29795" label="AVH79628_1 (interacts with) TVP63782_1" source="29460" target="29442" cy:directed="1"/>
      <edge id="29794" label="AVH79628_1 (interacts with) WP_012409787_8" source="29460" target="29440" cy:directed="1"/>
      <edge id="29793" label="AVH79628_1 (interacts with) WP_087592205_2" source="29460" target="29438" cy:directed="1"/>
      <edge id="29792" label="AVH79628_1 (interacts with) WP_167721203_5" source="29460" target="29436" cy:directed="1"/>
      <edge id="29791" label="AVH79628_1 (interacts with) WP_086760950_2" source="29460" target="29434" cy:directed="1"/>
      <edge id="29602" label="AVH79456_1 (interacts with) WP_087592205_4" source="29458" target="29470" cy:directed="1"/>
      <edge id="29601" label="AVH79456_1 (interacts with) WP_012597836_1" source="29458" target="29462" cy:directed="1"/>
      <edge id="29600" label="AVH79456_1 (interacts with) WP_168643398_1" source="29458" target="29466" cy:directed="1"/>
      <edge id="29741" label="WP_096679519_1 (interacts with) AVH79662_1" source="29456" target="29472" cy:directed="1"/>
      <edge id="29740" label="WP_096679519_1 (interacts with) WP_087592205_4" source="29456" target="29470" cy:directed="1"/>
      <edge id="29739" label="WP_096679519_1 (interacts with) WP_124970176_1" source="29456" target="29468" cy:directed="1"/>
      <edge id="29738" label="WP_096679519_1 (interacts with) WP_168643398_1" source="29456" target="29466" cy:directed="1"/>
      <edge id="29737" label="WP_096679519_1 (interacts with) WP_096589596_2" source="29456" target="29464" cy:directed="1"/>
      <edge id="29736" label="WP_096679519_1 (interacts with) WP_012597836_1" source="29456" target="29462" cy:directed="1"/>
      <edge id="29735" label="WP_096679519_1 (interacts with) AVH79456_1" source="29456" target="29458" cy:directed="1"/>
      <edge id="29734" label="WP_096679519_1 (interacts with) AVH79607_1" source="29456" target="29454" cy:directed="1"/>
      <edge id="29733" label="WP_096679519_1 (interacts with) WP_015216084_2" source="29456" target="29452" cy:directed="1"/>
      <edge id="29732" label="WP_096679519_1 (interacts with) WP_015216084_1" source="29456" target="29450" cy:directed="1"/>
      <edge id="29731" label="WP_096679519_1 (interacts with) WP_096589596_1" source="29456" target="29448" cy:directed="1"/>
      <edge id="29730" label="WP_096679519_1 (interacts with) WP_012595952_1" source="29456" target="29446" cy:directed="1"/>
      <edge id="29729" label="WP_096679519_1 (interacts with) WP_086760950_1" source="29456" target="29444" cy:directed="1"/>
      <edge id="29728" label="WP_096679519_1 (interacts with) TVP63782_1" source="29456" target="29442" cy:directed="1"/>
      <edge id="29727" label="WP_096679519_1 (interacts with) WP_012409787_8" source="29456" target="29440" cy:directed="1"/>
      <edge id="29726" label="WP_096679519_1 (interacts with) WP_087592205_2" source="29456" target="29438" cy:directed="1"/>
      <edge id="29725" label="WP_096679519_1 (interacts with) WP_167721203_5" source="29456" target="29436" cy:directed="1"/>
      <edge id="29724" label="WP_096679519_1 (interacts with) WP_086760950_2" source="29456" target="29434" cy:directed="1"/>
      <edge id="29723" label="AVH79607_1 (interacts with) WP_087592205_4" source="29454" target="29470" cy:directed="1"/>
      <edge id="29722" label="AVH79607_1 (interacts with) WP_012597836_1" source="29454" target="29462" cy:directed="1"/>
      <edge id="29721" label="AVH79607_1 (interacts with) WP_168643398_1" source="29454" target="29466" cy:directed="1"/>
      <edge id="29720" label="AVH79607_1 (interacts with) WP_096589596_2" source="29454" target="29464" cy:directed="1"/>
      <edge id="29719" label="AVH79607_1 (interacts with) AVH79456_1" source="29454" target="29458" cy:directed="1"/>
      <edge id="29718" label="AVH79607_1 (interacts with) WP_012595952_1" source="29454" target="29446" cy:directed="1"/>
      <edge id="29830" label="WP_015216084_2 (interacts with) WP_012597836_1" source="29452" target="29462" cy:directed="1"/>
      <edge id="29829" label="WP_015216084_2 (interacts with) WP_168643398_1" source="29452" target="29466" cy:directed="1"/>
      <edge id="29828" label="WP_015216084_2 (interacts with) WP_096589596_2" source="29452" target="29464" cy:directed="1"/>
      <edge id="29827" label="WP_015216084_2 (interacts with) AVH79456_1" source="29452" target="29458" cy:directed="1"/>
      <edge id="29826" label="WP_015216084_2 (interacts with) AVH79607_1" source="29452" target="29454" cy:directed="1"/>
      <edge id="29825" label="WP_015216084_2 (interacts with) WP_012595952_1" source="29452" target="29446" cy:directed="1"/>
      <edge id="29824" label="WP_015216084_2 (interacts with) TVP63782_1" source="29452" target="29442" cy:directed="1"/>
      <edge id="29790" label="WP_015216084_1 (interacts with) AVH79662_1" source="29450" target="29472" cy:directed="1"/>
      <edge id="29789" label="WP_015216084_1 (interacts with) WP_087592205_4" source="29450" target="29470" cy:directed="1"/>
      <edge id="29788" label="WP_015216084_1 (interacts with) WP_124970176_1" source="29450" target="29468" cy:directed="1"/>
      <edge id="29787" label="WP_015216084_1 (interacts with) WP_012597836_1" source="29450" target="29462" cy:directed="1"/>
      <edge id="29786" label="WP_015216084_1 (interacts with) WP_096589596_2" source="29450" target="29464" cy:directed="1"/>
      <edge id="29785" label="WP_015216084_1 (interacts with) WP_168643398_1" source="29450" target="29466" cy:directed="1"/>
      <edge id="29784" label="WP_015216084_1 (interacts with) AVH79456_1" source="29450" target="29458" cy:directed="1"/>
      <edge id="29783" label="WP_015216084_1 (interacts with) AVH79607_1" source="29450" target="29454" cy:directed="1"/>
      <edge id="29782" label="WP_015216084_1 (interacts with) WP_015216084_2" source="29450" target="29452" cy:directed="1"/>
      <edge id="29781" label="WP_015216084_1 (interacts with) WP_096589596_1" source="29450" target="29448" cy:directed="1"/>
      <edge id="29780" label="WP_015216084_1 (interacts with) WP_012595952_1" source="29450" target="29446" cy:directed="1"/>
      <edge id="29779" label="WP_015216084_1 (interacts with) TVP63782_1" source="29450" target="29442" cy:directed="1"/>
      <edge id="29778" label="WP_015216084_1 (interacts with) WP_012409787_8" source="29450" target="29440" cy:directed="1"/>
      <edge id="29777" label="WP_015216084_1 (interacts with) WP_167721203_5" source="29450" target="29436" cy:directed="1"/>
      <edge id="29583" label="WP_096589596_1 (interacts with) AVH79662_1" source="29448" target="29472" cy:directed="1"/>
      <edge id="29582" label="WP_096589596_1 (interacts with) WP_087592205_4" source="29448" target="29470" cy:directed="1"/>
      <edge id="29581" label="WP_096589596_1 (interacts with) WP_012597836_1" source="29448" target="29462" cy:directed="1"/>
      <edge id="29580" label="WP_096589596_1 (interacts with) WP_168643398_1" source="29448" target="29466" cy:directed="1"/>
      <edge id="29579" label="WP_096589596_1 (interacts with) WP_096589596_2" source="29448" target="29464" cy:directed="1"/>
      <edge id="29578" label="WP_096589596_1 (interacts with) AVH79456_1" source="29448" target="29458" cy:directed="1"/>
      <edge id="29577" label="WP_096589596_1 (interacts with) AVH79607_1" source="29448" target="29454" cy:directed="1"/>
      <edge id="29576" label="WP_096589596_1 (interacts with) WP_015216084_2" source="29448" target="29452" cy:directed="1"/>
      <edge id="29575" label="WP_096589596_1 (interacts with) WP_012595952_1" source="29448" target="29446" cy:directed="1"/>
      <edge id="29574" label="WP_096589596_1 (interacts with) TVP63782_1" source="29448" target="29442" cy:directed="1"/>
      <edge id="29573" label="WP_096589596_1 (interacts with) WP_012409787_8" source="29448" target="29440" cy:directed="1"/>
      <edge id="29572" label="WP_096589596_1 (interacts with) WP_167721203_5" source="29448" target="29436" cy:directed="1"/>
      <edge id="29717" label="WP_012595952_1 (interacts with) WP_087592205_4" source="29446" target="29470" cy:directed="1"/>
      <edge id="29716" label="WP_012595952_1 (interacts with) WP_012597836_1" source="29446" target="29462" cy:directed="1"/>
      <edge id="29715" label="WP_012595952_1 (interacts with) WP_096589596_2" source="29446" target="29464" cy:directed="1"/>
      <edge id="29714" label="WP_012595952_1 (interacts with) WP_168643398_1" source="29446" target="29466" cy:directed="1"/>
      <edge id="29713" label="WP_012595952_1 (interacts with) AVH79456_1" source="29446" target="29458" cy:directed="1"/>
      <edge id="29823" label="WP_086760950_1 (interacts with) AVH79662_1" source="29444" target="29472" cy:directed="1"/>
      <edge id="29822" label="WP_086760950_1 (interacts with) WP_087592205_4" source="29444" target="29470" cy:directed="1"/>
      <edge id="29821" label="WP_086760950_1 (interacts with) WP_124970176_1" source="29444" target="29468" cy:directed="1"/>
      <edge id="29820" label="WP_086760950_1 (interacts with) WP_168643398_1" source="29444" target="29466" cy:directed="1"/>
      <edge id="29819" label="WP_086760950_1 (interacts with) WP_096589596_2" source="29444" target="29464" cy:directed="1"/>
      <edge id="29818" label="WP_086760950_1 (interacts with) AVH79456_1" source="29444" target="29458" cy:directed="1"/>
      <edge id="29817" label="WP_086760950_1 (interacts with) WP_015216084_2" source="29444" target="29452" cy:directed="1"/>
      <edge id="29816" label="WP_086760950_1 (interacts with) AVH79607_1" source="29444" target="29454" cy:directed="1"/>
      <edge id="29815" label="WP_086760950_1 (interacts with) WP_015216084_1" source="29444" target="29450" cy:directed="1"/>
      <edge id="29814" label="WP_086760950_1 (interacts with) WP_096589596_1" source="29444" target="29448" cy:directed="1"/>
      <edge id="29813" label="WP_086760950_1 (interacts with) WP_012595952_1" source="29444" target="29446" cy:directed="1"/>
      <edge id="29812" label="WP_086760950_1 (interacts with) TVP63782_1" source="29444" target="29442" cy:directed="1"/>
      <edge id="29811" label="WP_086760950_1 (interacts with) WP_012409787_8" source="29444" target="29440" cy:directed="1"/>
      <edge id="29810" label="WP_086760950_1 (interacts with) WP_167721203_5" source="29444" target="29436" cy:directed="1"/>
      <edge id="29776" label="TVP63782_1 (interacts with) WP_087592205_4" source="29442" target="29470" cy:directed="1"/>
      <edge id="29775" label="TVP63782_1 (interacts with) WP_012597836_1" source="29442" target="29462" cy:directed="1"/>
      <edge id="29774" label="TVP63782_1 (interacts with) WP_168643398_1" source="29442" target="29466" cy:directed="1"/>
      <edge id="29773" label="TVP63782_1 (interacts with) WP_096589596_2" source="29442" target="29464" cy:directed="1"/>
      <edge id="29772" label="TVP63782_1 (interacts with) AVH79456_1" source="29442" target="29458" cy:directed="1"/>
      <edge id="29771" label="TVP63782_1 (interacts with) AVH79607_1" source="29442" target="29454" cy:directed="1"/>
      <edge id="29770" label="TVP63782_1 (interacts with) WP_012595952_1" source="29442" target="29446" cy:directed="1"/>
      <edge id="29547" label="WP_012409787_8 (interacts with) AVH79662_1" source="29440" target="29472" cy:directed="1"/>
      <edge id="29546" label="WP_012409787_8 (interacts with) WP_087592205_4" source="29440" target="29470" cy:directed="1"/>
      <edge id="29545" label="WP_012409787_8 (interacts with) WP_168643398_1" source="29440" target="29466" cy:directed="1"/>
      <edge id="29544" label="WP_012409787_8 (interacts with) WP_096589596_2" source="29440" target="29464" cy:directed="1"/>
      <edge id="29543" label="WP_012409787_8 (interacts with) AVH79456_1" source="29440" target="29458" cy:directed="1"/>
      <edge id="29542" label="WP_012409787_8 (interacts with) AVH79607_1" source="29440" target="29454" cy:directed="1"/>
      <edge id="29541" label="WP_012409787_8 (interacts with) WP_015216084_2" source="29440" target="29452" cy:directed="1"/>
      <edge id="29540" label="WP_012409787_8 (interacts with) WP_012595952_1" source="29440" target="29446" cy:directed="1"/>
      <edge id="29539" label="WP_012409787_8 (interacts with) TVP63782_1" source="29440" target="29442" cy:directed="1"/>
      <edge id="29538" label="WP_012409787_8 (interacts with) WP_167721203_5" source="29440" target="29436" cy:directed="1"/>
      <edge id="29599" label="WP_087592205_2 (interacts with) AVH79662_1" source="29438" target="29472" cy:directed="1"/>
      <edge id="29598" label="WP_087592205_2 (interacts with) WP_087592205_4" source="29438" target="29470" cy:directed="1"/>
      <edge id="29597" label="WP_087592205_2 (interacts with) WP_124970176_1" source="29438" target="29468" cy:directed="1"/>
      <edge id="29596" label="WP_087592205_2 (interacts with) WP_012597836_1" source="29438" target="29462" cy:directed="1"/>
      <edge id="29595" label="WP_087592205_2 (interacts with) WP_096589596_2" source="29438" target="29464" cy:directed="1"/>
      <edge id="29594" label="WP_087592205_2 (interacts with) WP_168643398_1" source="29438" target="29466" cy:directed="1"/>
      <edge id="29593" label="WP_087592205_2 (interacts with) AVH79456_1" source="29438" target="29458" cy:directed="1"/>
      <edge id="29592" label="WP_087592205_2 (interacts with) AVH79607_1" source="29438" target="29454" cy:directed="1"/>
      <edge id="29591" label="WP_087592205_2 (interacts with) WP_015216084_2" source="29438" target="29452" cy:directed="1"/>
      <edge id="29590" label="WP_087592205_2 (interacts with) WP_015216084_1" source="29438" target="29450" cy:directed="1"/>
      <edge id="29589" label="WP_087592205_2 (interacts with) WP_096589596_1" source="29438" target="29448" cy:directed="1"/>
      <edge id="29588" label="WP_087592205_2 (interacts with) WP_012595952_1" source="29438" target="29446" cy:directed="1"/>
      <edge id="29587" label="WP_087592205_2 (interacts with) WP_086760950_1" source="29438" target="29444" cy:directed="1"/>
      <edge id="29586" label="WP_087592205_2 (interacts with) TVP63782_1" source="29438" target="29442" cy:directed="1"/>
      <edge id="29585" label="WP_087592205_2 (interacts with) WP_012409787_8" source="29438" target="29440" cy:directed="1"/>
      <edge id="29584" label="WP_087592205_2 (interacts with) WP_167721203_5" source="29438" target="29436" cy:directed="1"/>
      <edge id="29491" label="WP_167721203_5 (interacts with) AVH79662_1" source="29436" target="29472" cy:directed="1"/>
      <edge id="29490" label="WP_167721203_5 (interacts with) WP_087592205_4" source="29436" target="29470" cy:directed="1"/>
      <edge id="29489" label="WP_167721203_5 (interacts with) WP_168643398_1" source="29436" target="29466" cy:directed="1"/>
      <edge id="29488" label="WP_167721203_5 (interacts with) WP_096589596_2" source="29436" target="29464" cy:directed="1"/>
      <edge id="29487" label="WP_167721203_5 (interacts with) AVH79456_1" source="29436" target="29458" cy:directed="1"/>
      <edge id="29486" label="WP_167721203_5 (interacts with) WP_015216084_2" source="29436" target="29452" cy:directed="1"/>
      <edge id="29485" label="WP_167721203_5 (interacts with) AVH79607_1" source="29436" target="29454" cy:directed="1"/>
      <edge id="29484" label="WP_167721203_5 (interacts with) WP_012595952_1" source="29436" target="29446" cy:directed="1"/>
      <edge id="29483" label="WP_167721203_5 (interacts with) TVP63782_1" source="29436" target="29442" cy:directed="1"/>
      <edge id="29712" label="WP_086760950_2 (interacts with) AVH79662_1" source="29434" target="29472" cy:directed="1"/>
      <edge id="29711" label="WP_086760950_2 (interacts with) WP_087592205_4" source="29434" target="29470" cy:directed="1"/>
      <edge id="29710" label="WP_086760950_2 (interacts with) WP_124970176_1" source="29434" target="29468" cy:directed="1"/>
      <edge id="29709" label="WP_086760950_2 (interacts with) WP_012597836_1" source="29434" target="29462" cy:directed="1"/>
      <edge id="29708" label="WP_086760950_2 (interacts with) WP_168643398_1" source="29434" target="29466" cy:directed="1"/>
      <edge id="29707" label="WP_086760950_2 (interacts with) WP_096589596_2" source="29434" target="29464" cy:directed="1"/>
      <edge id="29706" label="WP_086760950_2 (interacts with) AVH79456_1" source="29434" target="29458" cy:directed="1"/>
      <edge id="29705" label="WP_086760950_2 (interacts with) AVH79607_1" source="29434" target="29454" cy:directed="1"/>
      <edge id="29704" label="WP_086760950_2 (interacts with) WP_015216084_2" source="29434" target="29452" cy:directed="1"/>
      <edge id="29703" label="WP_086760950_2 (interacts with) WP_015216084_1" source="29434" target="29450" cy:directed="1"/>
      <edge id="29702" label="WP_086760950_2 (interacts with) WP_096589596_1" source="29434" target="29448" cy:directed="1"/>
      <edge id="29701" label="WP_086760950_2 (interacts with) WP_012595952_1" source="29434" target="29446" cy:directed="1"/>
      <edge id="29700" label="WP_086760950_2 (interacts with) WP_086760950_1" source="29434" target="29444" cy:directed="1"/>
      <edge id="29699" label="WP_086760950_2 (interacts with) TVP63782_1" source="29434" target="29442" cy:directed="1"/>
      <edge id="29698" label="WP_086760950_2 (interacts with) WP_012409787_8" source="29434" target="29440" cy:directed="1"/>
      <edge id="29697" label="WP_086760950_2 (interacts with) WP_087592205_2" source="29434" target="29438" cy:directed="1"/>
      <edge id="29696" label="WP_086760950_2 (interacts with) WP_167721203_5" source="29434" target="29436" cy:directed="1"/>
      <edge id="29473" label="WP_012409787_1 (interacts with) AVH79662_1" source="29433" target="29472" cy:directed="1"/>
      <edge id="29471" label="WP_012409787_1 (interacts with) WP_087592205_4" source="29433" target="29470" cy:directed="1"/>
      <edge id="29469" label="WP_012409787_1 (interacts with) WP_124970176_1" source="29433" target="29468" cy:directed="1"/>
      <edge id="29467" label="WP_012409787_1 (interacts with) WP_168643398_1" source="29433" target="29466" cy:directed="1"/>
      <edge id="29465" label="WP_012409787_1 (interacts with) WP_096589596_2" source="29433" target="29464" cy:directed="1"/>
      <edge id="29463" label="WP_012409787_1 (interacts with) WP_012597836_1" source="29433" target="29462" cy:directed="1"/>
      <edge id="29461" label="WP_012409787_1 (interacts with) AVH79628_1" source="29433" target="29460" cy:directed="1"/>
      <edge id="29459" label="WP_012409787_1 (interacts with) AVH79456_1" source="29433" target="29458" cy:directed="1"/>
      <edge id="29457" label="WP_012409787_1 (interacts with) WP_096679519_1" source="29433" target="29456" cy:directed="1"/>
      <edge id="29455" label="WP_012409787_1 (interacts with) AVH79607_1" source="29433" target="29454" cy:directed="1"/>
      <edge id="29453" label="WP_012409787_1 (interacts with) WP_015216084_2" source="29433" target="29452" cy:directed="1"/>
      <edge id="29451" label="WP_012409787_1 (interacts with) WP_015216084_1" source="29433" target="29450" cy:directed="1"/>
      <edge id="29449" label="WP_012409787_1 (interacts with) WP_096589596_1" source="29433" target="29448" cy:directed="1"/>
      <edge id="29447" label="WP_012409787_1 (interacts with) WP_012595952_1" source="29433" target="29446" cy:directed="1"/>
      <edge id="29445" label="WP_012409787_1 (interacts with) WP_086760950_1" source="29433" target="29444" cy:directed="1"/>
      <edge id="29443" label="WP_012409787_1 (interacts with) TVP63782_1" source="29433" target="29442" cy:directed="1"/>
      <edge id="29441" label="WP_012409787_1 (interacts with) WP_012409787_8" source="29433" target="29440" cy:directed="1"/>
      <edge id="29439" label="WP_012409787_1 (interacts with) WP_087592205_2" source="29433" target="29438" cy:directed="1"/>
      <edge id="29437" label="WP_012409787_1 (interacts with) WP_167721203_5" source="29433" target="29436" cy:directed="1"/>
      <edge id="29435" label="WP_012409787_1 (interacts with) WP_086760950_2" source="29433" target="29434" cy:directed="1"/>
      <edge id="29432" label="WP_106371152_6 (interacts with) WP_073643028_1" source="29417" target="29319" cy:directed="1"/>
      <edge id="29431" label="WP_106371152_6 (interacts with) WP_073643028_4" source="29417" target="29260" cy:directed="1"/>
      <edge id="29430" label="WP_106371152_6 (interacts with) WP_073591536_3" source="29417" target="29258" cy:directed="1"/>
      <edge id="29429" label="WP_106371152_6 (interacts with) WP_124970176_8" source="29417" target="29229" cy:directed="1"/>
      <edge id="29428" label="WP_106371152_6 (interacts with) WP_012409787_2" source="29417" target="29238" cy:directed="1"/>
      <edge id="29427" label="WP_106371152_6 (interacts with) AVH79662_4" source="29417" target="29236" cy:directed="1"/>
      <edge id="29426" label="WP_106371152_6 (interacts with) WP_138498533_1" source="29417" target="29297" cy:directed="1"/>
      <edge id="29425" label="WP_106371152_6 (interacts with) WP_086760950_5" source="29417" target="29267" cy:directed="1"/>
      <edge id="29424" label="WP_106371152_6 (interacts with) WP_104899482_1" source="29417" target="29251" cy:directed="1"/>
      <edge id="29423" label="WP_106371152_6 (interacts with) WP_168643398_3" source="29417" target="29249" cy:directed="1"/>
      <edge id="29422" label="WP_106371152_6 (interacts with) RCJ40334_2" source="29417" target="29306" cy:directed="1"/>
      <edge id="29421" label="WP_106371152_6 (interacts with) WP_096589596_5" source="29417" target="29245" cy:directed="1"/>
      <edge id="29420" label="WP_106371152_6 (interacts with) WP_167721203_4" source="29417" target="29234" cy:directed="1"/>
      <edge id="29419" label="WP_106371152_6 (interacts with) WP_015216084_3" source="29417" target="29247" cy:directed="1"/>
      <edge id="29418" label="WP_106371152_6 (interacts with) TVP63782_3" source="29417" target="29241" cy:directed="1"/>
      <edge id="29353" label="TCN71580_2 (interacts with) WP_096679519_3" source="29350" target="29231" cy:directed="1"/>
      <edge id="29352" label="TCN71580_2 (interacts with) CNF13542_3" source="29350" target="29351" cy:directed="1"/>
      <edge id="29337" label="WP_073591536_5 (interacts with) WP_012409787_2" source="29336" target="29238" cy:directed="1"/>
      <edge id="29325" label="WP_073643028_1 (interacts with) WP_106371152_2" source="29319" target="29253" cy:directed="1"/>
      <edge id="29324" label="WP_073643028_1 (interacts with) RCJ40334_2" source="29319" target="29306" cy:directed="1"/>
      <edge id="29323" label="WP_073643028_1 (interacts with) WP_104899482_3" source="29319" target="29240" cy:directed="1"/>
      <edge id="29322" label="WP_073643028_1 (interacts with) WP_073591536_3" source="29319" target="29258" cy:directed="1"/>
      <edge id="29321" label="WP_073643028_1 (interacts with) AVH79662_4" source="29319" target="29236" cy:directed="1"/>
      <edge id="29320" label="WP_073643028_1 (interacts with) TVP63782_3" source="29319" target="29241" cy:directed="1"/>
      <edge id="29318" label="WP_087592205_3 (interacts with) WP_168643398_3" source="29311" target="29249" cy:directed="1"/>
      <edge id="29317" label="WP_087592205_3 (interacts with) WP_012595952_3" source="29311" target="29243" cy:directed="1"/>
      <edge id="29316" label="WP_087592205_3 (interacts with) WP_096589596_5" source="29311" target="29245" cy:directed="1"/>
      <edge id="29315" label="WP_087592205_3 (interacts with) WP_015216084_3" source="29311" target="29247" cy:directed="1"/>
      <edge id="29314" label="WP_087592205_3 (interacts with) WP_167721203_4" source="29311" target="29234" cy:directed="1"/>
      <edge id="29313" label="WP_087592205_3 (interacts with) WP_124970176_8" source="29311" target="29229" cy:directed="1"/>
      <edge id="29312" label="WP_087592205_3 (interacts with) WP_086760950_5" source="29311" target="29267" cy:directed="1"/>
      <edge id="29310" label="RCJ40334_2 (interacts with) WP_106371152_2" source="29306" target="29253" cy:directed="1"/>
      <edge id="29309" label="RCJ40334_2 (interacts with) WP_104899482_3" source="29306" target="29240" cy:directed="1"/>
      <edge id="29308" label="RCJ40334_2 (interacts with) WP_073591536_3" source="29306" target="29258" cy:directed="1"/>
      <edge id="29307" label="RCJ40334_2 (interacts with) WP_015216084_3" source="29306" target="29247" cy:directed="1"/>
      <edge id="29416" label="WP_138498533_1 (interacts with) AVH79662_4" source="29297" target="29236" cy:directed="1"/>
      <edge id="29415" label="WP_138498533_1 (interacts with) WP_012409787_2" source="29297" target="29238" cy:directed="1"/>
      <edge id="29414" label="WP_138498533_1 (interacts with) WP_167721203_4" source="29297" target="29234" cy:directed="1"/>
      <edge id="29413" label="WP_138498533_1 (interacts with) RCJ40334_1" source="29297" target="29232" cy:directed="1"/>
      <edge id="29367" label="WP_103138325_7 (interacts with) WP_073643028_4" source="29281" target="29260" cy:directed="1"/>
      <edge id="29366" label="WP_103138325_7 (interacts with) WP_012409787_2" source="29281" target="29238" cy:directed="1"/>
      <edge id="29365" label="WP_103138325_7 (interacts with) AVH79662_4" source="29281" target="29236" cy:directed="1"/>
      <edge id="29364" label="WP_103138325_7 (interacts with) WP_138498533_1" source="29281" target="29297" cy:directed="1"/>
      <edge id="29363" label="WP_103138325_7 (interacts with) WP_086760950_5" source="29281" target="29267" cy:directed="1"/>
      <edge id="29362" label="WP_103138325_7 (interacts with) WP_168643398_3" source="29281" target="29249" cy:directed="1"/>
      <edge id="29361" label="WP_103138325_7 (interacts with) WP_096589596_5" source="29281" target="29245" cy:directed="1"/>
      <edge id="29360" label="WP_103138325_7 (interacts with) WP_167721203_4" source="29281" target="29234" cy:directed="1"/>
      <edge id="29359" label="WP_103138325_7 (interacts with) WP_096679519_3" source="29281" target="29231" cy:directed="1"/>
      <edge id="29358" label="WP_103138325_7 (interacts with) TVP63782_3" source="29281" target="29241" cy:directed="1"/>
      <edge id="29286" label="BAZ33272_2 (interacts with) WP_073643028_4" source="29271" target="29260" cy:directed="1"/>
      <edge id="29285" label="BAZ33272_2 (interacts with) AVH79662_4" source="29271" target="29236" cy:directed="1"/>
      <edge id="29284" label="BAZ33272_2 (interacts with) WP_012409787_2" source="29271" target="29238" cy:directed="1"/>
      <edge id="29283" label="BAZ33272_2 (interacts with) WP_086760950_5" source="29271" target="29267" cy:directed="1"/>
      <edge id="29282" label="BAZ33272_2 (interacts with) WP_103138325_7" source="29271" target="29281" cy:directed="1"/>
      <edge id="29280" label="BAZ33272_2 (interacts with) WP_104899482_1" source="29271" target="29251" cy:directed="1"/>
      <edge id="29279" label="BAZ33272_2 (interacts with) WP_168643398_3" source="29271" target="29249" cy:directed="1"/>
      <edge id="29278" label="BAZ33272_2 (interacts with) WP_015216084_3" source="29271" target="29247" cy:directed="1"/>
      <edge id="29277" label="BAZ33272_2 (interacts with) WP_096589596_5" source="29271" target="29245" cy:directed="1"/>
      <edge id="29276" label="BAZ33272_2 (interacts with) WP_167721203_4" source="29271" target="29234" cy:directed="1"/>
      <edge id="29275" label="BAZ33272_2 (interacts with) WP_096679519_3" source="29271" target="29231" cy:directed="1"/>
      <edge id="29274" label="BAZ33272_2 (interacts with) RCJ40334_1" source="29271" target="29232" cy:directed="1"/>
      <edge id="29273" label="BAZ33272_2 (interacts with) TVP63782_3" source="29271" target="29241" cy:directed="1"/>
      <edge id="29305" label="WP_086760950_5 (interacts with) WP_012409787_2" source="29267" target="29238" cy:directed="1"/>
      <edge id="29304" label="WP_086760950_5 (interacts with) WP_138498533_1" source="29267" target="29297" cy:directed="1"/>
      <edge id="29303" label="WP_086760950_5 (interacts with) WP_167721203_4" source="29267" target="29234" cy:directed="1"/>
      <edge id="29302" label="WP_086760950_5 (interacts with) RCJ40334_1" source="29267" target="29232" cy:directed="1"/>
      <edge id="29301" label="WP_086760950_5 (interacts with) AVH79662_4" source="29267" target="29236" cy:directed="1"/>
      <edge id="29395" label="WP_073643028_4 (interacts with) AVH79662_4" source="29260" target="29236" cy:directed="1"/>
      <edge id="29394" label="WP_073643028_4 (interacts with) WP_012409787_2" source="29260" target="29238" cy:directed="1"/>
      <edge id="29393" label="WP_073643028_4 (interacts with) WP_138498533_1" source="29260" target="29297" cy:directed="1"/>
      <edge id="29392" label="WP_073643028_4 (interacts with) WP_086760950_5" source="29260" target="29267" cy:directed="1"/>
      <edge id="29391" label="WP_073643028_4 (interacts with) WP_168643398_3" source="29260" target="29249" cy:directed="1"/>
      <edge id="29390" label="WP_073643028_4 (interacts with) WP_096589596_5" source="29260" target="29245" cy:directed="1"/>
      <edge id="29389" label="WP_073643028_4 (interacts with) WP_167721203_4" source="29260" target="29234" cy:directed="1"/>
      <edge id="29388" label="WP_073643028_4 (interacts with) RCJ40334_1" source="29260" target="29232" cy:directed="1"/>
      <edge id="29370" label="WP_073591536_3 (interacts with) WP_073591536_5" source="29258" target="29336" cy:directed="1"/>
      <edge id="29369" label="WP_073591536_3 (interacts with) WP_168643398_3" source="29258" target="29249" cy:directed="1"/>
      <edge id="29368" label="WP_073591536_3 (interacts with) TVP63782_3" source="29258" target="29241" cy:directed="1"/>
      <edge id="29349" label="WP_106371152_2 (interacts with) AVH79662_4" source="29253" target="29236" cy:directed="1"/>
      <edge id="29348" label="WP_106371152_2 (interacts with) WP_167721203_4" source="29253" target="29234" cy:directed="1"/>
      <edge id="29412" label="WP_104899482_1 (interacts with) WP_073643028_4" source="29251" target="29260" cy:directed="1"/>
      <edge id="29411" label="WP_104899482_1 (interacts with) WP_012409787_2" source="29251" target="29238" cy:directed="1"/>
      <edge id="29410" label="WP_104899482_1 (interacts with) WP_138498533_1" source="29251" target="29297" cy:directed="1"/>
      <edge id="29409" label="WP_104899482_1 (interacts with) WP_167721203_4" source="29251" target="29234" cy:directed="1"/>
      <edge id="29408" label="WP_104899482_1 (interacts with) WP_096589596_5" source="29251" target="29245" cy:directed="1"/>
      <edge id="29407" label="WP_104899482_1 (interacts with) WP_015216084_3" source="29251" target="29247" cy:directed="1"/>
      <edge id="29406" label="WP_104899482_1 (interacts with) WP_012595952_3" source="29251" target="29243" cy:directed="1"/>
      <edge id="29405" label="WP_104899482_1 (interacts with) RCJ40334_1" source="29251" target="29232" cy:directed="1"/>
      <edge id="29404" label="WP_104899482_1 (interacts with) WP_073591536_3" source="29251" target="29258" cy:directed="1"/>
      <edge id="29403" label="WP_104899482_1 (interacts with) WP_073591536_5" source="29251" target="29336" cy:directed="1"/>
      <edge id="29402" label="WP_104899482_1 (interacts with) AVH79662_4" source="29251" target="29236" cy:directed="1"/>
      <edge id="29401" label="WP_104899482_1 (interacts with) WP_124970176_8" source="29251" target="29229" cy:directed="1"/>
      <edge id="29400" label="WP_104899482_1 (interacts with) WP_086760950_5" source="29251" target="29267" cy:directed="1"/>
      <edge id="29399" label="WP_104899482_1 (interacts with) WP_106371152_2" source="29251" target="29253" cy:directed="1"/>
      <edge id="29398" label="WP_104899482_1 (interacts with) WP_168643398_3" source="29251" target="29249" cy:directed="1"/>
      <edge id="29397" label="WP_104899482_1 (interacts with) WP_096679519_3" source="29251" target="29231" cy:directed="1"/>
      <edge id="29396" label="WP_104899482_1 (interacts with) TVP63782_3" source="29251" target="29241" cy:directed="1"/>
      <edge id="29333" label="WP_168643398_3 (interacts with) WP_012409787_2" source="29249" target="29238" cy:directed="1"/>
      <edge id="29332" label="WP_168643398_3 (interacts with) WP_138498533_1" source="29249" target="29297" cy:directed="1"/>
      <edge id="29331" label="WP_168643398_3 (interacts with) WP_167721203_4" source="29249" target="29234" cy:directed="1"/>
      <edge id="29330" label="WP_168643398_3 (interacts with) RCJ40334_1" source="29249" target="29232" cy:directed="1"/>
      <edge id="29329" label="WP_168643398_3 (interacts with) WP_124970176_8" source="29249" target="29229" cy:directed="1"/>
      <edge id="29328" label="WP_168643398_3 (interacts with) AVH79662_4" source="29249" target="29236" cy:directed="1"/>
      <edge id="29327" label="WP_168643398_3 (interacts with) WP_086760950_5" source="29249" target="29267" cy:directed="1"/>
      <edge id="29326" label="WP_168643398_3 (interacts with) WP_096679519_3" source="29249" target="29231" cy:directed="1"/>
      <edge id="29387" label="WP_015216084_3 (interacts with) WP_073643028_4" source="29247" target="29260" cy:directed="1"/>
      <edge id="29386" label="WP_015216084_3 (interacts with) WP_012409787_2" source="29247" target="29238" cy:directed="1"/>
      <edge id="29385" label="WP_015216084_3 (interacts with) WP_138498533_1" source="29247" target="29297" cy:directed="1"/>
      <edge id="29384" label="WP_015216084_3 (interacts with) WP_012595952_3" source="29247" target="29243" cy:directed="1"/>
      <edge id="29383" label="WP_015216084_3 (interacts with) WP_167721203_4" source="29247" target="29234" cy:directed="1"/>
      <edge id="29382" label="WP_015216084_3 (interacts with) WP_096589596_5" source="29247" target="29245" cy:directed="1"/>
      <edge id="29381" label="WP_015216084_3 (interacts with) RCJ40334_1" source="29247" target="29232" cy:directed="1"/>
      <edge id="29380" label="WP_015216084_3 (interacts with) WP_073591536_3" source="29247" target="29258" cy:directed="1"/>
      <edge id="29379" label="WP_015216084_3 (interacts with) WP_124970176_8" source="29247" target="29229" cy:directed="1"/>
      <edge id="29378" label="WP_015216084_3 (interacts with) AVH79662_4" source="29247" target="29236" cy:directed="1"/>
      <edge id="29377" label="WP_015216084_3 (interacts with) WP_086760950_5" source="29247" target="29267" cy:directed="1"/>
      <edge id="29376" label="WP_015216084_3 (interacts with) WP_103138325_7" source="29247" target="29281" cy:directed="1"/>
      <edge id="29375" label="WP_015216084_3 (interacts with) WP_168643398_3" source="29247" target="29249" cy:directed="1"/>
      <edge id="29374" label="WP_015216084_3 (interacts with) WP_096679519_3" source="29247" target="29231" cy:directed="1"/>
      <edge id="29373" label="WP_015216084_3 (interacts with) TVP63782_3" source="29247" target="29241" cy:directed="1"/>
      <edge id="29347" label="WP_096589596_5 (interacts with) WP_012409787_2" source="29245" target="29238" cy:directed="1"/>
      <edge id="29346" label="WP_096589596_5 (interacts with) WP_138498533_1" source="29245" target="29297" cy:directed="1"/>
      <edge id="29345" label="WP_096589596_5 (interacts with) WP_167721203_4" source="29245" target="29234" cy:directed="1"/>
      <edge id="29344" label="WP_096589596_5 (interacts with) RCJ40334_1" source="29245" target="29232" cy:directed="1"/>
      <edge id="29343" label="WP_096589596_5 (interacts with) AVH79662_4" source="29245" target="29236" cy:directed="1"/>
      <edge id="29342" label="WP_096589596_5 (interacts with) WP_124970176_8" source="29245" target="29229" cy:directed="1"/>
      <edge id="29341" label="WP_096589596_5 (interacts with) WP_086760950_5" source="29245" target="29267" cy:directed="1"/>
      <edge id="29340" label="WP_096589596_5 (interacts with) WP_106371152_2" source="29245" target="29253" cy:directed="1"/>
      <edge id="29339" label="WP_096589596_5 (interacts with) WP_168643398_3" source="29245" target="29249" cy:directed="1"/>
      <edge id="29338" label="WP_096589596_5 (interacts with) WP_096679519_3" source="29245" target="29231" cy:directed="1"/>
      <edge id="29272" label="WP_012595952_3 (interacts with) BAZ33272_2" source="29243" target="29271" cy:directed="1"/>
      <edge id="29270" label="WP_012595952_3 (interacts with) WP_124970176_8" source="29243" target="29229" cy:directed="1"/>
      <edge id="29269" label="WP_012595952_3 (interacts with) AVH79662_4" source="29243" target="29236" cy:directed="1"/>
      <edge id="29268" label="WP_012595952_3 (interacts with) WP_086760950_5" source="29243" target="29267" cy:directed="1"/>
      <edge id="29266" label="WP_012595952_3 (interacts with) WP_168643398_3" source="29243" target="29249" cy:directed="1"/>
      <edge id="29265" label="WP_012595952_3 (interacts with) WP_096589596_5" source="29243" target="29245" cy:directed="1"/>
      <edge id="29264" label="WP_012595952_3 (interacts with) WP_167721203_4" source="29243" target="29234" cy:directed="1"/>
      <edge id="29263" label="WP_012595952_3 (interacts with) WP_096679519_3" source="29243" target="29231" cy:directed="1"/>
      <edge id="29300" label="TVP63782_3 (interacts with) WP_073643028_4" source="29241" target="29260" cy:directed="1"/>
      <edge id="29299" label="TVP63782_3 (interacts with) WP_012409787_2" source="29241" target="29238" cy:directed="1"/>
      <edge id="29298" label="TVP63782_3 (interacts with) WP_138498533_1" source="29241" target="29297" cy:directed="1"/>
      <edge id="29296" label="TVP63782_3 (interacts with) WP_012595952_3" source="29241" target="29243" cy:directed="1"/>
      <edge id="29295" label="TVP63782_3 (interacts with) WP_096589596_5" source="29241" target="29245" cy:directed="1"/>
      <edge id="29294" label="TVP63782_3 (interacts with) WP_167721203_4" source="29241" target="29234" cy:directed="1"/>
      <edge id="29293" label="TVP63782_3 (interacts with) RCJ40334_1" source="29241" target="29232" cy:directed="1"/>
      <edge id="29292" label="TVP63782_3 (interacts with) AVH79662_4" source="29241" target="29236" cy:directed="1"/>
      <edge id="29291" label="TVP63782_3 (interacts with) WP_124970176_8" source="29241" target="29229" cy:directed="1"/>
      <edge id="29290" label="TVP63782_3 (interacts with) WP_086760950_5" source="29241" target="29267" cy:directed="1"/>
      <edge id="29289" label="TVP63782_3 (interacts with) WP_106371152_2" source="29241" target="29253" cy:directed="1"/>
      <edge id="29288" label="TVP63782_3 (interacts with) WP_168643398_3" source="29241" target="29249" cy:directed="1"/>
      <edge id="29287" label="TVP63782_3 (interacts with) WP_096679519_3" source="29241" target="29231" cy:directed="1"/>
      <edge id="29261" label="WP_104899482_3 (interacts with) WP_073643028_4" source="29240" target="29260" cy:directed="1"/>
      <edge id="29259" label="WP_104899482_3 (interacts with) WP_073591536_3" source="29240" target="29258" cy:directed="1"/>
      <edge id="29257" label="WP_104899482_3 (interacts with) AVH79662_4" source="29240" target="29236" cy:directed="1"/>
      <edge id="29256" label="WP_104899482_3 (interacts with) WP_012409787_2" source="29240" target="29238" cy:directed="1"/>
      <edge id="29255" label="WP_104899482_3 (interacts with) WP_124970176_8" source="29240" target="29229" cy:directed="1"/>
      <edge id="29254" label="WP_104899482_3 (interacts with) WP_106371152_2" source="29240" target="29253" cy:directed="1"/>
      <edge id="29252" label="WP_104899482_3 (interacts with) WP_104899482_1" source="29240" target="29251" cy:directed="1"/>
      <edge id="29250" label="WP_104899482_3 (interacts with) WP_168643398_3" source="29240" target="29249" cy:directed="1"/>
      <edge id="29248" label="WP_104899482_3 (interacts with) WP_015216084_3" source="29240" target="29247" cy:directed="1"/>
      <edge id="29246" label="WP_104899482_3 (interacts with) WP_096589596_5" source="29240" target="29245" cy:directed="1"/>
      <edge id="29244" label="WP_104899482_3 (interacts with) WP_012595952_3" source="29240" target="29243" cy:directed="1"/>
      <edge id="29242" label="WP_104899482_3 (interacts with) TVP63782_3" source="29240" target="29241" cy:directed="1"/>
      <edge id="29357" label="WP_012409787_2 (interacts with) WP_167721203_4" source="29238" target="29234" cy:directed="1"/>
      <edge id="29356" label="WP_012409787_2 (interacts with) WP_012595952_3" source="29238" target="29243" cy:directed="1"/>
      <edge id="29355" label="WP_012409787_2 (interacts with) RCJ40334_1" source="29238" target="29232" cy:directed="1"/>
      <edge id="29354" label="WP_012409787_2 (interacts with) AVH79662_4" source="29238" target="29236" cy:directed="1"/>
      <edge id="29262" label="WP_167721203_4 (interacts with) AVH79662_4" source="29234" target="29236" cy:directed="1"/>
      <edge id="29335" label="RCJ40334_1 (interacts with) AVH79662_4" source="29232" target="29236" cy:directed="1"/>
      <edge id="29334" label="RCJ40334_1 (interacts with) WP_167721203_4" source="29232" target="29234" cy:directed="1"/>
      <edge id="29239" label="WP_096679519_3 (interacts with) WP_012409787_2" source="29231" target="29238" cy:directed="1"/>
      <edge id="29237" label="WP_096679519_3 (interacts with) AVH79662_4" source="29231" target="29236" cy:directed="1"/>
      <edge id="29235" label="WP_096679519_3 (interacts with) WP_167721203_4" source="29231" target="29234" cy:directed="1"/>
      <edge id="29233" label="WP_096679519_3 (interacts with) RCJ40334_1" source="29231" target="29232" cy:directed="1"/>
      <edge id="29372" label="WP_124970176_8 (interacts with) WP_167721203_4" source="29229" target="29234" cy:directed="1"/>
      <edge id="29371" label="WP_124970176_8 (interacts with) RCJ40334_1" source="29229" target="29232" cy:directed="1"/>
      <edge id="29230" label="WP_087592205_5 (interacts with) WP_124970176_8" source="29228" target="29229" cy:directed="1"/>
      <edge id="29177" label="WP_073631441_1 (interacts with) RCJ31639_2" source="29139" target="28470" cy:directed="1"/>
      <edge id="29176" label="WP_073631441_1 (interacts with) WP_103138934_1" source="29139" target="28468" cy:directed="1"/>
      <edge id="29175" label="WP_073631441_1 (interacts with) WP_096659345_1" source="29139" target="28943" cy:directed="1"/>
      <edge id="29174" label="WP_073631441_1 (interacts with) TAE58797_1" source="29139" target="28637" cy:directed="1"/>
      <edge id="29173" label="WP_073631441_1 (interacts with) WP_096680266_1" source="29139" target="28466" cy:directed="1"/>
      <edge id="29172" label="WP_073631441_1 (interacts with) BAZ15600_2" source="29139" target="28464" cy:directed="1"/>
      <edge id="29171" label="WP_073631441_1 (interacts with) TVP62142_1" source="29139" target="28462" cy:directed="1"/>
      <edge id="29170" label="WP_073631441_1 (interacts with) TWH40986_1" source="29139" target="28460" cy:directed="1"/>
      <edge id="29169" label="WP_073631441_1 (interacts with) WP_006196066_1" source="29139" target="28458" cy:directed="1"/>
      <edge id="29168" label="WP_073631441_1 (interacts with) WP_039742608_1" source="29139" target="28456" cy:directed="1"/>
      <edge id="29167" label="WP_073631441_1 (interacts with) BAZ29305_1" source="29139" target="28766" cy:directed="1"/>
      <edge id="29166" label="WP_073631441_1 (interacts with) WP_162399305_2" source="29139" target="28454" cy:directed="1"/>
      <edge id="29165" label="WP_073631441_1 (interacts with) WP_169219905_1" source="29139" target="28452" cy:directed="1"/>
      <edge id="29164" label="WP_073631441_1 (interacts with) WP_010996620_1" source="29139" target="28450" cy:directed="1"/>
      <edge id="29163" label="WP_073631441_1 (interacts with) WP_017315790_1" source="29139" target="28448" cy:directed="1"/>
      <edge id="29162" label="WP_073631441_1 (interacts with) WP_089092704_1" source="29139" target="28446" cy:directed="1"/>
      <edge id="29161" label="WP_073631441_1 (interacts with) WP_015116255_2" source="29139" target="28444" cy:directed="1"/>
      <edge id="29160" label="WP_073631441_1 (interacts with) RCJ34841_1" source="29139" target="28442" cy:directed="1"/>
      <edge id="29159" label="WP_073631441_1 (interacts with) WP_013190653_1" source="29139" target="28440" cy:directed="1"/>
      <edge id="29158" label="WP_073631441_1 (interacts with) WP_026093360_1" source="29139" target="28438" cy:directed="1"/>
      <edge id="29157" label="WP_073631441_1 (interacts with) WP_027840959_1" source="29139" target="28550" cy:directed="1"/>
      <edge id="29156" label="WP_073631441_1 (interacts with) WP_029637656_3" source="29139" target="28436" cy:directed="1"/>
      <edge id="29155" label="WP_073631441_1 (interacts with) WP_016950293_1" source="29139" target="28434" cy:directed="1"/>
      <edge id="29154" label="WP_073631441_1 (interacts with) WP_017320198_1" source="29139" target="28432" cy:directed="1"/>
      <edge id="29153" label="WP_073631441_1 (interacts with) WP_096559440_1" source="29139" target="28409" cy:directed="1"/>
      <edge id="29152" label="WP_073631441_1 (interacts with) WP_066380047_1" source="29139" target="29015" cy:directed="1"/>
      <edge id="29151" label="WP_073631441_1 (interacts with) BAZ80283_1" source="29139" target="28428" cy:directed="1"/>
      <edge id="29150" label="WP_073631441_1 (interacts with) WP_016874828_1" source="29139" target="28979" cy:directed="1"/>
      <edge id="29149" label="WP_073631441_1 (interacts with) WP_127056592_1" source="29139" target="28426" cy:directed="1"/>
      <edge id="29148" label="WP_073631441_1 (interacts with) WP_045869173_2" source="29139" target="28424" cy:directed="1"/>
      <edge id="29147" label="WP_073631441_1 (interacts with) WP_096583741_1" source="29139" target="28422" cy:directed="1"/>
      <edge id="29146" label="WP_073631441_1 (interacts with) BAZ41701_1" source="29139" target="28671" cy:directed="1"/>
      <edge id="29145" label="WP_073631441_1 (interacts with) WP_095720237_1" source="29139" target="28420" cy:directed="1"/>
      <edge id="29144" label="WP_073631441_1 (interacts with) WP_062294404_2" source="29139" target="28418" cy:directed="1"/>
      <edge id="29143" label="WP_073631441_1 (interacts with) WP_073619367_1" source="29139" target="28416" cy:directed="1"/>
      <edge id="29142" label="WP_073631441_1 (interacts with) WP_096561092_1" source="29139" target="28414" cy:directed="1"/>
      <edge id="29141" label="WP_073631441_1 (interacts with) WP_026732589_1" source="29139" target="28412" cy:directed="1"/>
      <edge id="29140" label="WP_073631441_1 (interacts with) WP_015216396_1" source="29139" target="28410" cy:directed="1"/>
      <edge id="29053" label="WP_066380047_1 (interacts with) RCJ31639_2" source="29015" target="28470" cy:directed="1"/>
      <edge id="29052" label="WP_066380047_1 (interacts with) TAE58797_1" source="29015" target="28637" cy:directed="1"/>
      <edge id="29051" label="WP_066380047_1 (interacts with) WP_096659345_1" source="29015" target="28943" cy:directed="1"/>
      <edge id="29050" label="WP_066380047_1 (interacts with) WP_103138934_1" source="29015" target="28468" cy:directed="1"/>
      <edge id="29049" label="WP_066380047_1 (interacts with) WP_096680266_1" source="29015" target="28466" cy:directed="1"/>
      <edge id="29048" label="WP_066380047_1 (interacts with) BAZ15600_2" source="29015" target="28464" cy:directed="1"/>
      <edge id="29047" label="WP_066380047_1 (interacts with) TVP62142_1" source="29015" target="28462" cy:directed="1"/>
      <edge id="29046" label="WP_066380047_1 (interacts with) TWH40986_1" source="29015" target="28460" cy:directed="1"/>
      <edge id="29045" label="WP_066380047_1 (interacts with) WP_006196066_1" source="29015" target="28458" cy:directed="1"/>
      <edge id="29044" label="WP_066380047_1 (interacts with) WP_039742608_1" source="29015" target="28456" cy:directed="1"/>
      <edge id="29043" label="WP_066380047_1 (interacts with) BAZ29305_1" source="29015" target="28766" cy:directed="1"/>
      <edge id="29042" label="WP_066380047_1 (interacts with) WP_162399305_2" source="29015" target="28454" cy:directed="1"/>
      <edge id="29041" label="WP_066380047_1 (interacts with) WP_169219905_1" source="29015" target="28452" cy:directed="1"/>
      <edge id="29040" label="WP_066380047_1 (interacts with) WP_010996620_1" source="29015" target="28450" cy:directed="1"/>
      <edge id="29039" label="WP_066380047_1 (interacts with) WP_017315790_1" source="29015" target="28448" cy:directed="1"/>
      <edge id="29038" label="WP_066380047_1 (interacts with) WP_089092704_1" source="29015" target="28446" cy:directed="1"/>
      <edge id="29037" label="WP_066380047_1 (interacts with) WP_015116255_2" source="29015" target="28444" cy:directed="1"/>
      <edge id="29036" label="WP_066380047_1 (interacts with) RCJ34841_1" source="29015" target="28442" cy:directed="1"/>
      <edge id="29035" label="WP_066380047_1 (interacts with) WP_013190653_1" source="29015" target="28440" cy:directed="1"/>
      <edge id="29034" label="WP_066380047_1 (interacts with) WP_026093360_1" source="29015" target="28438" cy:directed="1"/>
      <edge id="29033" label="WP_066380047_1 (interacts with) WP_027840959_1" source="29015" target="28550" cy:directed="1"/>
      <edge id="29032" label="WP_066380047_1 (interacts with) WP_029637656_3" source="29015" target="28436" cy:directed="1"/>
      <edge id="29031" label="WP_066380047_1 (interacts with) WP_016950293_1" source="29015" target="28434" cy:directed="1"/>
      <edge id="29030" label="WP_066380047_1 (interacts with) WP_017320198_1" source="29015" target="28432" cy:directed="1"/>
      <edge id="29029" label="WP_066380047_1 (interacts with) WP_096559440_1" source="29015" target="28409" cy:directed="1"/>
      <edge id="29028" label="WP_066380047_1 (interacts with) WP_168491601_1" source="29015" target="28430" cy:directed="1"/>
      <edge id="29027" label="WP_066380047_1 (interacts with) BAZ80283_1" source="29015" target="28428" cy:directed="1"/>
      <edge id="29026" label="WP_066380047_1 (interacts with) WP_016874828_1" source="29015" target="28979" cy:directed="1"/>
      <edge id="29025" label="WP_066380047_1 (interacts with) WP_045869173_2" source="29015" target="28424" cy:directed="1"/>
      <edge id="29024" label="WP_066380047_1 (interacts with) WP_127056592_1" source="29015" target="28426" cy:directed="1"/>
      <edge id="29023" label="WP_066380047_1 (interacts with) WP_096583741_1" source="29015" target="28422" cy:directed="1"/>
      <edge id="29022" label="WP_066380047_1 (interacts with) BAZ41701_1" source="29015" target="28671" cy:directed="1"/>
      <edge id="29021" label="WP_066380047_1 (interacts with) WP_095720237_1" source="29015" target="28420" cy:directed="1"/>
      <edge id="29020" label="WP_066380047_1 (interacts with) WP_062294404_2" source="29015" target="28418" cy:directed="1"/>
      <edge id="29019" label="WP_066380047_1 (interacts with) WP_073619367_1" source="29015" target="28416" cy:directed="1"/>
      <edge id="29018" label="WP_066380047_1 (interacts with) WP_096561092_1" source="29015" target="28414" cy:directed="1"/>
      <edge id="29017" label="WP_066380047_1 (interacts with) WP_026732589_1" source="29015" target="28412" cy:directed="1"/>
      <edge id="29016" label="WP_066380047_1 (interacts with) WP_015216396_1" source="29015" target="28410" cy:directed="1"/>
      <edge id="29014" label="WP_016874828_1 (interacts with) RCJ31639_2" source="28979" target="28470" cy:directed="1"/>
      <edge id="29013" label="WP_016874828_1 (interacts with) TAE58797_1" source="28979" target="28637" cy:directed="1"/>
      <edge id="29012" label="WP_016874828_1 (interacts with) WP_103138934_1" source="28979" target="28468" cy:directed="1"/>
      <edge id="29011" label="WP_016874828_1 (interacts with) WP_096659345_1" source="28979" target="28943" cy:directed="1"/>
      <edge id="29010" label="WP_016874828_1 (interacts with) WP_096680266_1" source="28979" target="28466" cy:directed="1"/>
      <edge id="29009" label="WP_016874828_1 (interacts with) BAZ15600_2" source="28979" target="28464" cy:directed="1"/>
      <edge id="29008" label="WP_016874828_1 (interacts with) TVP62142_1" source="28979" target="28462" cy:directed="1"/>
      <edge id="29007" label="WP_016874828_1 (interacts with) TWH40986_1" source="28979" target="28460" cy:directed="1"/>
      <edge id="29006" label="WP_016874828_1 (interacts with) WP_006196066_1" source="28979" target="28458" cy:directed="1"/>
      <edge id="29005" label="WP_016874828_1 (interacts with) WP_039742608_1" source="28979" target="28456" cy:directed="1"/>
      <edge id="29004" label="WP_016874828_1 (interacts with) BAZ29305_1" source="28979" target="28766" cy:directed="1"/>
      <edge id="29003" label="WP_016874828_1 (interacts with) WP_162399305_2" source="28979" target="28454" cy:directed="1"/>
      <edge id="29002" label="WP_016874828_1 (interacts with) WP_169219905_1" source="28979" target="28452" cy:directed="1"/>
      <edge id="29001" label="WP_016874828_1 (interacts with) WP_010996620_1" source="28979" target="28450" cy:directed="1"/>
      <edge id="29000" label="WP_016874828_1 (interacts with) WP_017315790_1" source="28979" target="28448" cy:directed="1"/>
      <edge id="28999" label="WP_016874828_1 (interacts with) WP_089092704_1" source="28979" target="28446" cy:directed="1"/>
      <edge id="28998" label="WP_016874828_1 (interacts with) WP_015116255_2" source="28979" target="28444" cy:directed="1"/>
      <edge id="28997" label="WP_016874828_1 (interacts with) RCJ34841_1" source="28979" target="28442" cy:directed="1"/>
      <edge id="28996" label="WP_016874828_1 (interacts with) WP_013190653_1" source="28979" target="28440" cy:directed="1"/>
      <edge id="28995" label="WP_016874828_1 (interacts with) WP_026093360_1" source="28979" target="28438" cy:directed="1"/>
      <edge id="28994" label="WP_016874828_1 (interacts with) WP_029637656_3" source="28979" target="28436" cy:directed="1"/>
      <edge id="28993" label="WP_016874828_1 (interacts with) WP_016950293_1" source="28979" target="28434" cy:directed="1"/>
      <edge id="28992" label="WP_016874828_1 (interacts with) WP_017320198_1" source="28979" target="28432" cy:directed="1"/>
      <edge id="28991" label="WP_016874828_1 (interacts with) WP_096559440_1" source="28979" target="28409" cy:directed="1"/>
      <edge id="28990" label="WP_016874828_1 (interacts with) BAZ80283_1" source="28979" target="28428" cy:directed="1"/>
      <edge id="28989" label="WP_016874828_1 (interacts with) WP_127056592_1" source="28979" target="28426" cy:directed="1"/>
      <edge id="28988" label="WP_016874828_1 (interacts with) WP_045869173_2" source="28979" target="28424" cy:directed="1"/>
      <edge id="28987" label="WP_016874828_1 (interacts with) WP_096583741_1" source="28979" target="28422" cy:directed="1"/>
      <edge id="28986" label="WP_016874828_1 (interacts with) BAZ41701_1" source="28979" target="28671" cy:directed="1"/>
      <edge id="28985" label="WP_016874828_1 (interacts with) WP_095720237_1" source="28979" target="28420" cy:directed="1"/>
      <edge id="28984" label="WP_016874828_1 (interacts with) WP_062294404_2" source="28979" target="28418" cy:directed="1"/>
      <edge id="28983" label="WP_016874828_1 (interacts with) WP_073619367_1" source="28979" target="28416" cy:directed="1"/>
      <edge id="28982" label="WP_016874828_1 (interacts with) WP_096561092_1" source="28979" target="28414" cy:directed="1"/>
      <edge id="28981" label="WP_016874828_1 (interacts with) WP_026732589_1" source="28979" target="28412" cy:directed="1"/>
      <edge id="28980" label="WP_016874828_1 (interacts with) WP_015216396_1" source="28979" target="28410" cy:directed="1"/>
      <edge id="28978" label="WP_096659345_1 (interacts with) RCJ31639_2" source="28943" target="28470" cy:directed="1"/>
      <edge id="28977" label="WP_096659345_1 (interacts with) WP_103138934_1" source="28943" target="28468" cy:directed="1"/>
      <edge id="28976" label="WP_096659345_1 (interacts with) TAE58797_1" source="28943" target="28637" cy:directed="1"/>
      <edge id="28975" label="WP_096659345_1 (interacts with) WP_096680266_1" source="28943" target="28466" cy:directed="1"/>
      <edge id="28974" label="WP_096659345_1 (interacts with) BAZ15600_2" source="28943" target="28464" cy:directed="1"/>
      <edge id="28973" label="WP_096659345_1 (interacts with) TVP62142_1" source="28943" target="28462" cy:directed="1"/>
      <edge id="28972" label="WP_096659345_1 (interacts with) TWH40986_1" source="28943" target="28460" cy:directed="1"/>
      <edge id="28971" label="WP_096659345_1 (interacts with) WP_006196066_1" source="28943" target="28458" cy:directed="1"/>
      <edge id="28970" label="WP_096659345_1 (interacts with) WP_039742608_1" source="28943" target="28456" cy:directed="1"/>
      <edge id="28969" label="WP_096659345_1 (interacts with) BAZ29305_1" source="28943" target="28766" cy:directed="1"/>
      <edge id="28968" label="WP_096659345_1 (interacts with) WP_162399305_2" source="28943" target="28454" cy:directed="1"/>
      <edge id="28967" label="WP_096659345_1 (interacts with) WP_169219905_1" source="28943" target="28452" cy:directed="1"/>
      <edge id="28966" label="WP_096659345_1 (interacts with) WP_010996620_1" source="28943" target="28450" cy:directed="1"/>
      <edge id="28965" label="WP_096659345_1 (interacts with) WP_017315790_1" source="28943" target="28448" cy:directed="1"/>
      <edge id="28964" label="WP_096659345_1 (interacts with) WP_089092704_1" source="28943" target="28446" cy:directed="1"/>
      <edge id="28963" label="WP_096659345_1 (interacts with) WP_015116255_2" source="28943" target="28444" cy:directed="1"/>
      <edge id="28962" label="WP_096659345_1 (interacts with) RCJ34841_1" source="28943" target="28442" cy:directed="1"/>
      <edge id="28961" label="WP_096659345_1 (interacts with) WP_013190653_1" source="28943" target="28440" cy:directed="1"/>
      <edge id="28960" label="WP_096659345_1 (interacts with) WP_026093360_1" source="28943" target="28438" cy:directed="1"/>
      <edge id="28959" label="WP_096659345_1 (interacts with) WP_027840959_1" source="28943" target="28550" cy:directed="1"/>
      <edge id="28958" label="WP_096659345_1 (interacts with) WP_029637656_3" source="28943" target="28436" cy:directed="1"/>
      <edge id="28957" label="WP_096659345_1 (interacts with) WP_016950293_1" source="28943" target="28434" cy:directed="1"/>
      <edge id="28956" label="WP_096659345_1 (interacts with) WP_017320198_1" source="28943" target="28432" cy:directed="1"/>
      <edge id="28955" label="WP_096659345_1 (interacts with) WP_096559440_1" source="28943" target="28409" cy:directed="1"/>
      <edge id="28954" label="WP_096659345_1 (interacts with) BAZ80283_1" source="28943" target="28428" cy:directed="1"/>
      <edge id="28953" label="WP_096659345_1 (interacts with) WP_127056592_1" source="28943" target="28426" cy:directed="1"/>
      <edge id="28952" label="WP_096659345_1 (interacts with) WP_045869173_2" source="28943" target="28424" cy:directed="1"/>
      <edge id="28951" label="WP_096659345_1 (interacts with) WP_096583741_1" source="28943" target="28422" cy:directed="1"/>
      <edge id="28950" label="WP_096659345_1 (interacts with) BAZ41701_1" source="28943" target="28671" cy:directed="1"/>
      <edge id="28949" label="WP_096659345_1 (interacts with) WP_095720237_1" source="28943" target="28420" cy:directed="1"/>
      <edge id="28948" label="WP_096659345_1 (interacts with) WP_073619367_1" source="28943" target="28416" cy:directed="1"/>
      <edge id="28947" label="WP_096659345_1 (interacts with) WP_062294404_2" source="28943" target="28418" cy:directed="1"/>
      <edge id="28946" label="WP_096659345_1 (interacts with) WP_096561092_1" source="28943" target="28414" cy:directed="1"/>
      <edge id="28945" label="WP_096659345_1 (interacts with) WP_026732589_1" source="28943" target="28412" cy:directed="1"/>
      <edge id="28944" label="WP_096659345_1 (interacts with) WP_015216396_1" source="28943" target="28410" cy:directed="1"/>
      <edge id="28802" label="BAZ29305_1 (interacts with) RCJ31639_2" source="28766" target="28470" cy:directed="1"/>
      <edge id="28801" label="BAZ29305_1 (interacts with) TAE58797_1" source="28766" target="28637" cy:directed="1"/>
      <edge id="28800" label="BAZ29305_1 (interacts with) WP_103138934_1" source="28766" target="28468" cy:directed="1"/>
      <edge id="28799" label="BAZ29305_1 (interacts with) WP_096680266_1" source="28766" target="28466" cy:directed="1"/>
      <edge id="28798" label="BAZ29305_1 (interacts with) BAZ15600_2" source="28766" target="28464" cy:directed="1"/>
      <edge id="28797" label="BAZ29305_1 (interacts with) TVP62142_1" source="28766" target="28462" cy:directed="1"/>
      <edge id="28796" label="BAZ29305_1 (interacts with) TWH40986_1" source="28766" target="28460" cy:directed="1"/>
      <edge id="28795" label="BAZ29305_1 (interacts with) WP_006196066_1" source="28766" target="28458" cy:directed="1"/>
      <edge id="28794" label="BAZ29305_1 (interacts with) WP_039742608_1" source="28766" target="28456" cy:directed="1"/>
      <edge id="28793" label="BAZ29305_1 (interacts with) WP_162399305_2" source="28766" target="28454" cy:directed="1"/>
      <edge id="28792" label="BAZ29305_1 (interacts with) WP_169219905_1" source="28766" target="28452" cy:directed="1"/>
      <edge id="28791" label="BAZ29305_1 (interacts with) WP_071187741_1" source="28766" target="28472" cy:directed="1"/>
      <edge id="28790" label="BAZ29305_1 (interacts with) WP_010996620_1" source="28766" target="28450" cy:directed="1"/>
      <edge id="28789" label="BAZ29305_1 (interacts with) WP_017315790_1" source="28766" target="28448" cy:directed="1"/>
      <edge id="28788" label="BAZ29305_1 (interacts with) WP_089092704_1" source="28766" target="28446" cy:directed="1"/>
      <edge id="28787" label="BAZ29305_1 (interacts with) WP_015116255_2" source="28766" target="28444" cy:directed="1"/>
      <edge id="28786" label="BAZ29305_1 (interacts with) RCJ34841_1" source="28766" target="28442" cy:directed="1"/>
      <edge id="28785" label="BAZ29305_1 (interacts with) WP_013190653_1" source="28766" target="28440" cy:directed="1"/>
      <edge id="28784" label="BAZ29305_1 (interacts with) WP_026093360_1" source="28766" target="28438" cy:directed="1"/>
      <edge id="28783" label="BAZ29305_1 (interacts with) WP_027840959_1" source="28766" target="28550" cy:directed="1"/>
      <edge id="28782" label="BAZ29305_1 (interacts with) WP_029637656_3" source="28766" target="28436" cy:directed="1"/>
      <edge id="28781" label="BAZ29305_1 (interacts with) WP_016950293_1" source="28766" target="28434" cy:directed="1"/>
      <edge id="28780" label="BAZ29305_1 (interacts with) WP_017320198_1" source="28766" target="28432" cy:directed="1"/>
      <edge id="28779" label="BAZ29305_1 (interacts with) WP_096559440_1" source="28766" target="28409" cy:directed="1"/>
      <edge id="28778" label="BAZ29305_1 (interacts with) WP_168491601_1" source="28766" target="28430" cy:directed="1"/>
      <edge id="28777" label="BAZ29305_1 (interacts with) BAZ80283_1" source="28766" target="28428" cy:directed="1"/>
      <edge id="28776" label="BAZ29305_1 (interacts with) WP_127056592_1" source="28766" target="28426" cy:directed="1"/>
      <edge id="28775" label="BAZ29305_1 (interacts with) WP_045869173_2" source="28766" target="28424" cy:directed="1"/>
      <edge id="28774" label="BAZ29305_1 (interacts with) WP_096583741_1" source="28766" target="28422" cy:directed="1"/>
      <edge id="28773" label="BAZ29305_1 (interacts with) BAZ41701_1" source="28766" target="28671" cy:directed="1"/>
      <edge id="28772" label="BAZ29305_1 (interacts with) WP_095720237_1" source="28766" target="28420" cy:directed="1"/>
      <edge id="28771" label="BAZ29305_1 (interacts with) WP_062294404_2" source="28766" target="28418" cy:directed="1"/>
      <edge id="28770" label="BAZ29305_1 (interacts with) WP_073619367_1" source="28766" target="28416" cy:directed="1"/>
      <edge id="28769" label="BAZ29305_1 (interacts with) WP_026732589_1" source="28766" target="28412" cy:directed="1"/>
      <edge id="28768" label="BAZ29305_1 (interacts with) WP_096561092_1" source="28766" target="28414" cy:directed="1"/>
      <edge id="28767" label="BAZ29305_1 (interacts with) WP_015216396_1" source="28766" target="28410" cy:directed="1"/>
      <edge id="28703" label="BAZ41701_1 (interacts with) RCJ31639_2" source="28671" target="28470" cy:directed="1"/>
      <edge id="28702" label="BAZ41701_1 (interacts with) TAE58797_1" source="28671" target="28637" cy:directed="1"/>
      <edge id="28701" label="BAZ41701_1 (interacts with) WP_103138934_1" source="28671" target="28468" cy:directed="1"/>
      <edge id="28700" label="BAZ41701_1 (interacts with) WP_096680266_1" source="28671" target="28466" cy:directed="1"/>
      <edge id="28699" label="BAZ41701_1 (interacts with) BAZ15600_2" source="28671" target="28464" cy:directed="1"/>
      <edge id="28698" label="BAZ41701_1 (interacts with) TVP62142_1" source="28671" target="28462" cy:directed="1"/>
      <edge id="28697" label="BAZ41701_1 (interacts with) TWH40986_1" source="28671" target="28460" cy:directed="1"/>
      <edge id="28696" label="BAZ41701_1 (interacts with) WP_006196066_1" source="28671" target="28458" cy:directed="1"/>
      <edge id="28695" label="BAZ41701_1 (interacts with) WP_039742608_1" source="28671" target="28456" cy:directed="1"/>
      <edge id="28694" label="BAZ41701_1 (interacts with) WP_162399305_2" source="28671" target="28454" cy:directed="1"/>
      <edge id="28693" label="BAZ41701_1 (interacts with) WP_169219905_1" source="28671" target="28452" cy:directed="1"/>
      <edge id="28692" label="BAZ41701_1 (interacts with) WP_010996620_1" source="28671" target="28450" cy:directed="1"/>
      <edge id="28691" label="BAZ41701_1 (interacts with) WP_017315790_1" source="28671" target="28448" cy:directed="1"/>
      <edge id="28690" label="BAZ41701_1 (interacts with) WP_089092704_1" source="28671" target="28446" cy:directed="1"/>
      <edge id="28689" label="BAZ41701_1 (interacts with) WP_015116255_2" source="28671" target="28444" cy:directed="1"/>
      <edge id="28688" label="BAZ41701_1 (interacts with) RCJ34841_1" source="28671" target="28442" cy:directed="1"/>
      <edge id="28687" label="BAZ41701_1 (interacts with) WP_013190653_1" source="28671" target="28440" cy:directed="1"/>
      <edge id="28686" label="BAZ41701_1 (interacts with) WP_026093360_1" source="28671" target="28438" cy:directed="1"/>
      <edge id="28685" label="BAZ41701_1 (interacts with) WP_029637656_3" source="28671" target="28436" cy:directed="1"/>
      <edge id="28684" label="BAZ41701_1 (interacts with) WP_016950293_1" source="28671" target="28434" cy:directed="1"/>
      <edge id="28683" label="BAZ41701_1 (interacts with) WP_017320198_1" source="28671" target="28432" cy:directed="1"/>
      <edge id="28682" label="BAZ41701_1 (interacts with) WP_096559440_1" source="28671" target="28409" cy:directed="1"/>
      <edge id="28681" label="BAZ41701_1 (interacts with) BAZ80283_1" source="28671" target="28428" cy:directed="1"/>
      <edge id="28680" label="BAZ41701_1 (interacts with) WP_095720237_1" source="28671" target="28420" cy:directed="1"/>
      <edge id="28679" label="BAZ41701_1 (interacts with) WP_127056592_1" source="28671" target="28426" cy:directed="1"/>
      <edge id="28678" label="BAZ41701_1 (interacts with) WP_045869173_2" source="28671" target="28424" cy:directed="1"/>
      <edge id="28677" label="BAZ41701_1 (interacts with) WP_096583741_1" source="28671" target="28422" cy:directed="1"/>
      <edge id="28676" label="BAZ41701_1 (interacts with) WP_073619367_1" source="28671" target="28416" cy:directed="1"/>
      <edge id="28675" label="BAZ41701_1 (interacts with) WP_062294404_2" source="28671" target="28418" cy:directed="1"/>
      <edge id="28674" label="BAZ41701_1 (interacts with) WP_096561092_1" source="28671" target="28414" cy:directed="1"/>
      <edge id="28673" label="BAZ41701_1 (interacts with) WP_026732589_1" source="28671" target="28412" cy:directed="1"/>
      <edge id="28672" label="BAZ41701_1 (interacts with) WP_015216396_1" source="28671" target="28410" cy:directed="1"/>
      <edge id="28670" label="TAE58797_1 (interacts with) RCJ31639_2" source="28637" target="28470" cy:directed="1"/>
      <edge id="28669" label="TAE58797_1 (interacts with) WP_103138934_1" source="28637" target="28468" cy:directed="1"/>
      <edge id="28668" label="TAE58797_1 (interacts with) WP_096680266_1" source="28637" target="28466" cy:directed="1"/>
      <edge id="28667" label="TAE58797_1 (interacts with) BAZ15600_2" source="28637" target="28464" cy:directed="1"/>
      <edge id="28666" label="TAE58797_1 (interacts with) TVP62142_1" source="28637" target="28462" cy:directed="1"/>
      <edge id="28665" label="TAE58797_1 (interacts with) TWH40986_1" source="28637" target="28460" cy:directed="1"/>
      <edge id="28664" label="TAE58797_1 (interacts with) WP_006196066_1" source="28637" target="28458" cy:directed="1"/>
      <edge id="28663" label="TAE58797_1 (interacts with) WP_039742608_1" source="28637" target="28456" cy:directed="1"/>
      <edge id="28662" label="TAE58797_1 (interacts with) WP_162399305_2" source="28637" target="28454" cy:directed="1"/>
      <edge id="28661" label="TAE58797_1 (interacts with) WP_169219905_1" source="28637" target="28452" cy:directed="1"/>
      <edge id="28660" label="TAE58797_1 (interacts with) WP_071187741_1" source="28637" target="28472" cy:directed="1"/>
      <edge id="28659" label="TAE58797_1 (interacts with) WP_010996620_1" source="28637" target="28450" cy:directed="1"/>
      <edge id="28658" label="TAE58797_1 (interacts with) WP_017315790_1" source="28637" target="28448" cy:directed="1"/>
      <edge id="28657" label="TAE58797_1 (interacts with) WP_089092704_1" source="28637" target="28446" cy:directed="1"/>
      <edge id="28656" label="TAE58797_1 (interacts with) WP_015116255_2" source="28637" target="28444" cy:directed="1"/>
      <edge id="28655" label="TAE58797_1 (interacts with) RCJ34841_1" source="28637" target="28442" cy:directed="1"/>
      <edge id="28654" label="TAE58797_1 (interacts with) WP_013190653_1" source="28637" target="28440" cy:directed="1"/>
      <edge id="28653" label="TAE58797_1 (interacts with) WP_026093360_1" source="28637" target="28438" cy:directed="1"/>
      <edge id="28652" label="TAE58797_1 (interacts with) WP_029637656_3" source="28637" target="28436" cy:directed="1"/>
      <edge id="28651" label="TAE58797_1 (interacts with) WP_016950293_1" source="28637" target="28434" cy:directed="1"/>
      <edge id="28650" label="TAE58797_1 (interacts with) WP_017320198_1" source="28637" target="28432" cy:directed="1"/>
      <edge id="28649" label="TAE58797_1 (interacts with) WP_096559440_1" source="28637" target="28409" cy:directed="1"/>
      <edge id="28648" label="TAE58797_1 (interacts with) WP_168491601_1" source="28637" target="28430" cy:directed="1"/>
      <edge id="28647" label="TAE58797_1 (interacts with) BAZ80283_1" source="28637" target="28428" cy:directed="1"/>
      <edge id="28646" label="TAE58797_1 (interacts with) WP_127056592_1" source="28637" target="28426" cy:directed="1"/>
      <edge id="28645" label="TAE58797_1 (interacts with) WP_045869173_2" source="28637" target="28424" cy:directed="1"/>
      <edge id="28644" label="TAE58797_1 (interacts with) WP_096583741_1" source="28637" target="28422" cy:directed="1"/>
      <edge id="28643" label="TAE58797_1 (interacts with) WP_095720237_1" source="28637" target="28420" cy:directed="1"/>
      <edge id="28642" label="TAE58797_1 (interacts with) WP_062294404_2" source="28637" target="28418" cy:directed="1"/>
      <edge id="28641" label="TAE58797_1 (interacts with) WP_073619367_1" source="28637" target="28416" cy:directed="1"/>
      <edge id="28640" label="TAE58797_1 (interacts with) WP_096561092_1" source="28637" target="28414" cy:directed="1"/>
      <edge id="28639" label="TAE58797_1 (interacts with) WP_026732589_1" source="28637" target="28412" cy:directed="1"/>
      <edge id="28638" label="TAE58797_1 (interacts with) WP_015216396_1" source="28637" target="28410" cy:directed="1"/>
      <edge id="29080" label="WP_027840959_1 (interacts with) RCJ31639_2" source="28550" target="28470" cy:directed="1"/>
      <edge id="29079" label="WP_027840959_1 (interacts with) WP_103138934_1" source="28550" target="28468" cy:directed="1"/>
      <edge id="29078" label="WP_027840959_1 (interacts with) TAE58797_1" source="28550" target="28637" cy:directed="1"/>
      <edge id="29077" label="WP_027840959_1 (interacts with) TVP62142_1" source="28550" target="28462" cy:directed="1"/>
      <edge id="29076" label="WP_027840959_1 (interacts with) WP_006196066_1" source="28550" target="28458" cy:directed="1"/>
      <edge id="29075" label="WP_027840959_1 (interacts with) TWH40986_1" source="28550" target="28460" cy:directed="1"/>
      <edge id="29074" label="WP_027840959_1 (interacts with) WP_039742608_1" source="28550" target="28456" cy:directed="1"/>
      <edge id="29073" label="WP_027840959_1 (interacts with) WP_162399305_2" source="28550" target="28454" cy:directed="1"/>
      <edge id="29072" label="WP_027840959_1 (interacts with) WP_017315790_1" source="28550" target="28448" cy:directed="1"/>
      <edge id="29071" label="WP_027840959_1 (interacts with) WP_089092704_1" source="28550" target="28446" cy:directed="1"/>
      <edge id="29070" label="WP_027840959_1 (interacts with) WP_015116255_2" source="28550" target="28444" cy:directed="1"/>
      <edge id="29069" label="WP_027840959_1 (interacts with) WP_013190653_1" source="28550" target="28440" cy:directed="1"/>
      <edge id="29068" label="WP_027840959_1 (interacts with) WP_029637656_3" source="28550" target="28436" cy:directed="1"/>
      <edge id="29067" label="WP_027840959_1 (interacts with) WP_016950293_1" source="28550" target="28434" cy:directed="1"/>
      <edge id="29066" label="WP_027840959_1 (interacts with) WP_017320198_1" source="28550" target="28432" cy:directed="1"/>
      <edge id="29065" label="WP_027840959_1 (interacts with) WP_096559440_1" source="28550" target="28409" cy:directed="1"/>
      <edge id="29064" label="WP_027840959_1 (interacts with) BAZ80283_1" source="28550" target="28428" cy:directed="1"/>
      <edge id="29063" label="WP_027840959_1 (interacts with) WP_127056592_1" source="28550" target="28426" cy:directed="1"/>
      <edge id="29062" label="WP_027840959_1 (interacts with) WP_096583741_1" source="28550" target="28422" cy:directed="1"/>
      <edge id="29061" label="WP_027840959_1 (interacts with) WP_095720237_1" source="28550" target="28420" cy:directed="1"/>
      <edge id="29060" label="WP_027840959_1 (interacts with) BAZ41701_1" source="28550" target="28671" cy:directed="1"/>
      <edge id="29059" label="WP_027840959_1 (interacts with) WP_045869173_2" source="28550" target="28424" cy:directed="1"/>
      <edge id="29058" label="WP_027840959_1 (interacts with) WP_073619367_1" source="28550" target="28416" cy:directed="1"/>
      <edge id="29057" label="WP_027840959_1 (interacts with) WP_062294404_2" source="28550" target="28418" cy:directed="1"/>
      <edge id="29056" label="WP_027840959_1 (interacts with) WP_096561092_1" source="28550" target="28414" cy:directed="1"/>
      <edge id="29055" label="WP_027840959_1 (interacts with) WP_026732589_1" source="28550" target="28412" cy:directed="1"/>
      <edge id="29054" label="WP_027840959_1 (interacts with) WP_015216396_1" source="28550" target="28410" cy:directed="1"/>
      <edge id="28482" label="WP_071187741_1 (interacts with) WP_013190653_1" source="28472" target="28440" cy:directed="1"/>
      <edge id="28481" label="WP_071187741_1 (interacts with) WP_168491601_1" source="28472" target="28430" cy:directed="1"/>
      <edge id="28480" label="WP_071187741_1 (interacts with) BAZ80283_1" source="28472" target="28428" cy:directed="1"/>
      <edge id="28479" label="WP_071187741_1 (interacts with) WP_169219905_1" source="28472" target="28452" cy:directed="1"/>
      <edge id="28478" label="WP_071187741_1 (interacts with) WP_127056592_1" source="28472" target="28426" cy:directed="1"/>
      <edge id="28477" label="WP_071187741_1 (interacts with) WP_096583741_1" source="28472" target="28422" cy:directed="1"/>
      <edge id="28476" label="WP_071187741_1 (interacts with) WP_045869173_2" source="28472" target="28424" cy:directed="1"/>
      <edge id="28475" label="WP_071187741_1 (interacts with) WP_062294404_2" source="28472" target="28418" cy:directed="1"/>
      <edge id="28474" label="WP_071187741_1 (interacts with) WP_015216396_1" source="28472" target="28410" cy:directed="1"/>
      <edge id="28473" label="WP_071187741_1 (interacts with) WP_016950293_1" source="28472" target="28434" cy:directed="1"/>
      <edge id="28516" label="RCJ31639_2 (interacts with) TVP62142_1" source="28470" target="28462" cy:directed="1"/>
      <edge id="28515" label="RCJ31639_2 (interacts with) WP_006196066_1" source="28470" target="28458" cy:directed="1"/>
      <edge id="28514" label="RCJ31639_2 (interacts with) TWH40986_1" source="28470" target="28460" cy:directed="1"/>
      <edge id="28513" label="RCJ31639_2 (interacts with) WP_162399305_2" source="28470" target="28454" cy:directed="1"/>
      <edge id="28512" label="RCJ31639_2 (interacts with) WP_169219905_1" source="28470" target="28452" cy:directed="1"/>
      <edge id="28511" label="RCJ31639_2 (interacts with) WP_071187741_1" source="28470" target="28472" cy:directed="1"/>
      <edge id="28510" label="RCJ31639_2 (interacts with) WP_017315790_1" source="28470" target="28448" cy:directed="1"/>
      <edge id="28509" label="RCJ31639_2 (interacts with) WP_015116255_2" source="28470" target="28444" cy:directed="1"/>
      <edge id="28508" label="RCJ31639_2 (interacts with) WP_013190653_1" source="28470" target="28440" cy:directed="1"/>
      <edge id="28507" label="RCJ31639_2 (interacts with) WP_029637656_3" source="28470" target="28436" cy:directed="1"/>
      <edge id="28506" label="RCJ31639_2 (interacts with) WP_016950293_1" source="28470" target="28434" cy:directed="1"/>
      <edge id="28505" label="RCJ31639_2 (interacts with) WP_168491601_1" source="28470" target="28430" cy:directed="1"/>
      <edge id="28504" label="RCJ31639_2 (interacts with) BAZ80283_1" source="28470" target="28428" cy:directed="1"/>
      <edge id="28503" label="RCJ31639_2 (interacts with) WP_127056592_1" source="28470" target="28426" cy:directed="1"/>
      <edge id="28502" label="RCJ31639_2 (interacts with) WP_045869173_2" source="28470" target="28424" cy:directed="1"/>
      <edge id="28501" label="RCJ31639_2 (interacts with) WP_096583741_1" source="28470" target="28422" cy:directed="1"/>
      <edge id="28500" label="RCJ31639_2 (interacts with) WP_095720237_1" source="28470" target="28420" cy:directed="1"/>
      <edge id="28499" label="RCJ31639_2 (interacts with) WP_062294404_2" source="28470" target="28418" cy:directed="1"/>
      <edge id="28498" label="RCJ31639_2 (interacts with) WP_073619367_1" source="28470" target="28416" cy:directed="1"/>
      <edge id="28497" label="RCJ31639_2 (interacts with) WP_096561092_1" source="28470" target="28414" cy:directed="1"/>
      <edge id="28496" label="RCJ31639_2 (interacts with) WP_015216396_1" source="28470" target="28410" cy:directed="1"/>
      <edge id="29126" label="WP_103138934_1 (interacts with) RCJ31639_2" source="28468" target="28470" cy:directed="1"/>
      <edge id="29125" label="WP_103138934_1 (interacts with) WP_096680266_1" source="28468" target="28466" cy:directed="1"/>
      <edge id="29124" label="WP_103138934_1 (interacts with) BAZ15600_2" source="28468" target="28464" cy:directed="1"/>
      <edge id="29123" label="WP_103138934_1 (interacts with) TVP62142_1" source="28468" target="28462" cy:directed="1"/>
      <edge id="29122" label="WP_103138934_1 (interacts with) TWH40986_1" source="28468" target="28460" cy:directed="1"/>
      <edge id="29121" label="WP_103138934_1 (interacts with) WP_006196066_1" source="28468" target="28458" cy:directed="1"/>
      <edge id="29120" label="WP_103138934_1 (interacts with) WP_039742608_1" source="28468" target="28456" cy:directed="1"/>
      <edge id="29119" label="WP_103138934_1 (interacts with) WP_162399305_2" source="28468" target="28454" cy:directed="1"/>
      <edge id="29118" label="WP_103138934_1 (interacts with) WP_169219905_1" source="28468" target="28452" cy:directed="1"/>
      <edge id="29117" label="WP_103138934_1 (interacts with) WP_017315790_1" source="28468" target="28448" cy:directed="1"/>
      <edge id="29116" label="WP_103138934_1 (interacts with) WP_089092704_1" source="28468" target="28446" cy:directed="1"/>
      <edge id="29115" label="WP_103138934_1 (interacts with) WP_015116255_2" source="28468" target="28444" cy:directed="1"/>
      <edge id="29114" label="WP_103138934_1 (interacts with) RCJ34841_1" source="28468" target="28442" cy:directed="1"/>
      <edge id="29113" label="WP_103138934_1 (interacts with) WP_013190653_1" source="28468" target="28440" cy:directed="1"/>
      <edge id="29112" label="WP_103138934_1 (interacts with) WP_026093360_1" source="28468" target="28438" cy:directed="1"/>
      <edge id="29111" label="WP_103138934_1 (interacts with) WP_029637656_3" source="28468" target="28436" cy:directed="1"/>
      <edge id="29110" label="WP_103138934_1 (interacts with) WP_016950293_1" source="28468" target="28434" cy:directed="1"/>
      <edge id="29109" label="WP_103138934_1 (interacts with) WP_017320198_1" source="28468" target="28432" cy:directed="1"/>
      <edge id="29108" label="WP_103138934_1 (interacts with) BAZ80283_1" source="28468" target="28428" cy:directed="1"/>
      <edge id="29107" label="WP_103138934_1 (interacts with) WP_045869173_2" source="28468" target="28424" cy:directed="1"/>
      <edge id="29106" label="WP_103138934_1 (interacts with) WP_127056592_1" source="28468" target="28426" cy:directed="1"/>
      <edge id="29105" label="WP_103138934_1 (interacts with) WP_096583741_1" source="28468" target="28422" cy:directed="1"/>
      <edge id="29104" label="WP_103138934_1 (interacts with) WP_095720237_1" source="28468" target="28420" cy:directed="1"/>
      <edge id="29103" label="WP_103138934_1 (interacts with) WP_062294404_2" source="28468" target="28418" cy:directed="1"/>
      <edge id="29102" label="WP_103138934_1 (interacts with) WP_073619367_1" source="28468" target="28416" cy:directed="1"/>
      <edge id="29101" label="WP_103138934_1 (interacts with) WP_096561092_1" source="28468" target="28414" cy:directed="1"/>
      <edge id="29100" label="WP_103138934_1 (interacts with) WP_026732589_1" source="28468" target="28412" cy:directed="1"/>
      <edge id="29099" label="WP_103138934_1 (interacts with) WP_015216396_1" source="28468" target="28410" cy:directed="1"/>
      <edge id="28597" label="WP_096680266_1 (interacts with) RCJ31639_2" source="28466" target="28470" cy:directed="1"/>
      <edge id="28596" label="WP_096680266_1 (interacts with) BAZ15600_2" source="28466" target="28464" cy:directed="1"/>
      <edge id="28595" label="WP_096680266_1 (interacts with) TVP62142_1" source="28466" target="28462" cy:directed="1"/>
      <edge id="28594" label="WP_096680266_1 (interacts with) TWH40986_1" source="28466" target="28460" cy:directed="1"/>
      <edge id="28593" label="WP_096680266_1 (interacts with) WP_006196066_1" source="28466" target="28458" cy:directed="1"/>
      <edge id="28592" label="WP_096680266_1 (interacts with) WP_162399305_2" source="28466" target="28454" cy:directed="1"/>
      <edge id="28591" label="WP_096680266_1 (interacts with) WP_169219905_1" source="28466" target="28452" cy:directed="1"/>
      <edge id="28590" label="WP_096680266_1 (interacts with) WP_017315790_1" source="28466" target="28448" cy:directed="1"/>
      <edge id="28589" label="WP_096680266_1 (interacts with) WP_089092704_1" source="28466" target="28446" cy:directed="1"/>
      <edge id="28588" label="WP_096680266_1 (interacts with) WP_015116255_2" source="28466" target="28444" cy:directed="1"/>
      <edge id="28587" label="WP_096680266_1 (interacts with) WP_013190653_1" source="28466" target="28440" cy:directed="1"/>
      <edge id="28586" label="WP_096680266_1 (interacts with) WP_027840959_1" source="28466" target="28550" cy:directed="1"/>
[truncated: 3,388,023 more chars]
