# Supplementary material for: Understanding thioamitide biosynthesis using pathway engineering and untargeted metabolomics
Source: Royal Society of Chemistry journal article supplement (doi:10.1039/d0sc06835g), 2021-01-01
Supplement: d0sc06835g3.cys [file d0sc06835g3.cys › CytoscapeSession-2021_03_29-10_56/tables/35-cc_1.to.202.txt/SHARED_ATTRS-org.cytoscape.model.CyEdge-cc_1.to.202.txt+root+shared++edge.cytable]

CyCSV-Version	1
SUID	EVALUE	HIT%ID	MIN_COV_OPT	shared interaction	shared name	SS%ID
java.lang.Long	java.lang.Integer	java.lang.Double	java.lang.Integer	java.lang.String	java.lang.String	java.lang.Double
	mutable	mutable	mutable			mutable
cc_1.to.202.txt root shared edge
73	22	54.054	1	interacts with	WP_162399505_1 (interacts with) WP_096559014_1	52.63
75	9	40.58	1	interacts with	WP_162399505_1 (interacts with) WP_138498533_4	47.46
77	12	47.368	1	interacts with	WP_162399505_1 (interacts with) WP_066383651_5	46.75
79	25	58.667	1	interacts with	WP_162399505_1 (interacts with) WP_096536886_5	57.9
81	22	53.947	1	interacts with	WP_162399505_1 (interacts with) WP_015212417_1	53.25
83	19	52.564	1	interacts with	WP_162399505_1 (interacts with) WP_006195640_4	53.25
85	23	55.405	1	interacts with	WP_162399505_1 (interacts with) WP_099071810_2	53.25
87	22	63.158	1	interacts with	WP_162399505_1 (interacts with) WP_015113151_1	62.34
89	26	62.667	1	interacts with	WP_162399505_1 (interacts with) WP_096559014_5	61.04
91	15	48.052	1	interacts with	WP_162399505_1 (interacts with) BAZ29283_1	48.05
93	13	48.0	1	interacts with	WP_162399505_1 (interacts with) WP_096730381_2	46.75
95	11	44.444	1	interacts with	WP_162399505_1 (interacts with) WP_073639381_1	44.44
97	13	40.789	1	interacts with	WP_162399505_1 (interacts with) WP_162399505_5	43.06
99	11	40.506	1	interacts with	WP_162399505_1 (interacts with) WP_026100063_2	41.56
101	22	51.807	1	interacts with	WP_162399505_1 (interacts with) CEJ45116_2	55.84
103	22	61.538	1	interacts with	WP_162399505_1 (interacts with) WP_062295185_1	62.34
105	13	48.649	1	interacts with	WP_162399505_1 (interacts with) WP_087539234_4	46.75
107	9	42.105	1	interacts with	WP_162399505_1 (interacts with) WP_015210601_6	45.07
109	17	46.341	1	interacts with	WP_162399505_1 (interacts with) CEJ45116_5	49.35
111	24	58.667	1	interacts with	WP_162399505_1 (interacts with) WP_099071810_1	57.9
113	22	52.632	1	interacts with	WP_162399505_1 (interacts with) WP_009343975_1	51.95
115	11	45.0	1	interacts with	WP_162399505_1 (interacts with) TAE59458_3	46.75
117	22	56.962	1	interacts with	WP_162399505_1 (interacts with) WP_016950446_1	58.44
119	13	46.667	1	interacts with	WP_162399505_1 (interacts with) WP_087539234_7	45.45
121	26	62.667	1	interacts with	WP_162399505_1 (interacts with) WP_096559014_4	61.04
123	24	59.74	1	interacts with	WP_162399505_1 (interacts with) WP_013190203_1	59.74
125	10	49.123	1	interacts with	WP_162399505_1 (interacts with) WP_106240815_2	40.0
127	24	58.824	1	interacts with	WP_162399505_1 (interacts with) WP_096575011_6	64.94
129	17	46.988	1	interacts with	WP_162399505_1 (interacts with) OBQ18754_2	50.65
131	24	55.263	1	interacts with	WP_162399505_1 (interacts with) WP_015212417_2	54.55
133	11	43.038	1	interacts with	WP_162399505_1 (interacts with) WP_011321056_1	44.16
135	13	46.25	1	interacts with	WP_162399505_1 (interacts with) WP_069073064_6	50.0
137	23	55.128	1	interacts with	WP_162399505_1 (interacts with) RCJ30949_2	55.84
139	25	57.895	1	interacts with	WP_162399505_1 (interacts with) WP_071189061_3	57.89
141	13	48.101	1	interacts with	WP_162399505_1 (interacts with) WP_069073064_1	49.35
143	22	51.807	1	interacts with	WP_162399505_1 (interacts with) CEJ45116_1	55.84
145	12	58.14	1	interacts with	WP_162399505_1 (interacts with) OBQ01900_3	42.37
147	25	60.0	1	interacts with	WP_162399505_1 (interacts with) WP_096536886_1	59.21
149	22	58.108	1	interacts with	WP_162399505_1 (interacts with) TVP62740_1	55.84
151	13	50.667	1	interacts with	WP_162399505_1 (interacts with) BAZ29283_4	49.35
153	26	62.5	1	interacts with	WP_162399505_1 (interacts with) WP_096575011_3	64.94
155	14	48.81	1	interacts with	WP_162399505_1 (interacts with) WP_168496018_1	53.25
157	24	56.0	1	interacts with	WP_162399505_1 (interacts with) RCJ30949_4	55.26
159	11	46.835	1	interacts with	WP_162399505_1 (interacts with) WP_087539234_1	48.05
161	5	43.636	1	interacts with	WP_162399505_1 (interacts with) WP_096728455_2	40.68
163	14	45.783	1	interacts with	WP_162399505_1 (interacts with) WP_168645325_1	49.35
165	13	42.5	1	interacts with	WP_162399505_1 (interacts with) WP_096681247_5	44.16
167	13	50.0	1	interacts with	WP_162399505_1 (interacts with) WP_069073064_5	52.7
169	26	61.333	1	interacts with	WP_162399505_1 (interacts with) RCJ14929_3	61.33
171	21	57.143	1	interacts with	WP_162399505_1 (interacts with) WP_089091039_2	57.14
173	12	46.053	1	interacts with	WP_162399505_1 (interacts with) WP_011321056_5	45.45
175	14	51.316	1	interacts with	WP_162399505_1 (interacts with) BAZ29283_3	50.65
177	28	87.755	1	interacts with	WP_162399505_1 (interacts with) WP_162399505_4	55.84
179	15	49.367	1	interacts with	WP_162399505_1 (interacts with) OBQ36138_1	50.65
181	23	54.667	1	interacts with	WP_162399505_1 (interacts with) WP_096569967_3	54.67
183	23	55.844	1	interacts with	WP_162399505_1 (interacts with) WP_096569967_5	55.84
185	8	51.02	1	interacts with	WP_162399505_1 (interacts with) TVP62740_6	46.3
187	12	45.122	1	interacts with	WP_162399505_1 (interacts with) WP_096681247_2	48.05
189	13	47.945	1	interacts with	WP_162399505_1 (interacts with) WP_044449859_1	50.72
191	22	54.667	1	interacts with	WP_162399505_1 (interacts with) WP_096569967_4	53.95
193	18	48.193	1	interacts with	WP_162399505_1 (interacts with) WP_006195640_2	51.95
195	17	47.561	1	interacts with	WP_162399505_1 (interacts with) WP_168465654_1	50.65
197	25	61.972	1	interacts with	WP_162399505_1 (interacts with) WP_073644071_5	58.67
199	23	57.895	1	interacts with	WP_162399505_1 (interacts with) WP_096559014_8	57.14
201	24	55.263	1	interacts with	WP_162399505_1 (interacts with) WP_071189061_2	55.26
203	23	58.442	1	interacts with	WP_162399505_1 (interacts with) WP_006195640_7	58.44
205	12	43.421	1	interacts with	WP_162399505_1 (interacts with) WP_066383651_2	42.86
207	23	57.317	1	interacts with	WP_162399505_1 (interacts with) WP_089091039_3	61.04
209	14	46.753	1	interacts with	WP_162399505_1 (interacts with) WP_015155263_3	46.75
211	11	40.0	1	interacts with	WP_162399505_1 (interacts with) WP_026100063_6	41.56
213	20	57.143	1	interacts with	WP_162399505_1 (interacts with) WP_096575011_2	57.14
215	24	56.0	1	interacts with	WP_162399505_1 (interacts with) RCJ30949_5	55.26
217	25	61.333	1	interacts with	WP_162399505_1 (interacts with) WP_099071810_6	60.53
219	11	45.122	1	interacts with	WP_162399505_1 (interacts with) WP_066383651_4	48.05
220	10	42.105	1	interacts with	WP_096559014_1 (interacts with) WP_096730381_2	42.1
222	10	42.105	1	interacts with	WP_096559014_1 (interacts with) WP_096730381_1	42.1
225	15	52.857	1	interacts with	WP_096569967_6 (interacts with) OBQ36138_3	52.11
227	14	41.791	1	interacts with	WP_096569967_6 (interacts with) WP_114082527_7	40.0
229	16	52.239	1	interacts with	WP_096569967_6 (interacts with) WP_015078657_10	50.72
231	15	49.275	1	interacts with	WP_096569967_6 (interacts with) WP_137906310_5	47.89
233	16	46.269	1	interacts with	WP_096569967_6 (interacts with) WP_096664869_5	44.93
235	19	46.479	1	interacts with	WP_096569967_6 (interacts with) WP_168496018_3	46.48
237	16	41.667	1	interacts with	WP_096569967_6 (interacts with) OBQ18150_1	42.25
239	25	62.687	1	interacts with	WP_096569967_6 (interacts with) WP_057178590_8	60.87
241	17	49.296	1	interacts with	WP_096569967_6 (interacts with) BAZ29283_7	47.95
243	17	52.239	1	interacts with	WP_096569967_6 (interacts with) WP_148763415_5	50.72
245	33	73.239	1	interacts with	WP_096569967_6 (interacts with) WP_071189061_4	73.24
247	24	62.687	1	interacts with	WP_096569967_6 (interacts with) WP_009343975_4	60.87
249	17	50.746	1	interacts with	WP_096569967_6 (interacts with) WP_168465654_4	49.28
251	17	46.269	1	interacts with	WP_096569967_6 (interacts with) WP_168501874_4	44.29
253	15	44.776	1	interacts with	WP_096569967_6 (interacts with) WP_168645325_4	43.48
254	17	47.761	1	interacts with	WP_096569967_6 (interacts with) WP_015210601_6	45.07
256	27	66.197	1	interacts with	WP_096569967_6 (interacts with) WP_013190203_4	66.2
258	15	40.278	1	interacts with	WP_096569967_6 (interacts with) WP_027402982_8	40.85
260	14	48.611	1	interacts with	WP_096569967_6 (interacts with) WP_038089561_4	44.87
262	18	53.731	1	interacts with	WP_096569967_6 (interacts with) OBQ18754_3	52.17
264	16	51.515	1	interacts with	WP_096569967_6 (interacts with) WP_168357543_5	47.89
266	12	50.0	1	interacts with	WP_011610106_2 (interacts with) WP_138498533_4	49.12
268	19	66.071	1	interacts with	WP_011610106_2 (interacts with) WP_124155194_2	71.15
270	9	58.974	1	interacts with	WP_011610106_2 (interacts with) WP_124970176_6	40.35
272	12	49.02	1	interacts with	WP_011610106_2 (interacts with) WP_015216084_5	43.86
274	14	45.763	1	interacts with	WP_011610106_2 (interacts with) WP_167725682_2	47.37
276	10	46.154	1	interacts with	WP_011610106_2 (interacts with) WP_073591536_1	42.11
278	12	70.27	0	interacts with	WP_011610106_2 (interacts with) WP_006619051_7	45.61
280	12	58.696	1	interacts with	WP_011610106_2 (interacts with) WP_087542717_3	47.37
282	12	63.158	0	interacts with	WP_011610106_2 (interacts with) WP_163927072_1	42.11
283	14	45.763	1	interacts with	WP_011610106_2 (interacts with) WP_096730381_2	47.37
285	10	42.593	1	interacts with	WP_011610106_2 (interacts with) WP_106218514_1	40.35
287	11	46.296	1	interacts with	WP_011610106_2 (interacts with) AVH79535_6	43.86
289	12	44.231	1	interacts with	WP_011610106_2 (interacts with) WP_012597836_5	44.23
291	9	53.488	1	interacts with	WP_011610106_2 (interacts with) WP_015216084_10	40.35
293	11	48.148	1	interacts with	WP_011610106_2 (interacts with) WP_096580419_1	45.61
295	12	44.231	1	interacts with	WP_011610106_2 (interacts with) WP_012597836_4	44.23
297	11	52.273	1	interacts with	WP_011610106_2 (interacts with) WP_109013279_1	40.35
299	14	65.789	1	interacts with	WP_011610106_2 (interacts with) WP_017721129_1	43.86
301	10	58.974	1	interacts with	WP_011610106_2 (interacts with) WP_086769105_4	40.35
303	12	48.148	1	interacts with	WP_011610106_2 (interacts with) WP_070396036_3	45.61
305	11	60.526	1	interacts with	WP_011610106_2 (interacts with) WP_127086205_3	40.35
307	11	60.0	1	interacts with	WP_011610106_2 (interacts with) WP_127086205_4	42.11
309	11	50.0	1	interacts with	WP_011610106_2 (interacts with) WP_168643398_4	47.37
311	12	60.526	1	interacts with	WP_011610106_2 (interacts with) WP_099068319_5	40.35
312	12	57.5	0	interacts with	WP_011610106_2 (interacts with) WP_087539234_7	40.35
314	12	58.696	1	interacts with	WP_011610106_2 (interacts with) WP_087542717_2	47.37
316	11	45.614	1	interacts with	WP_011610106_2 (interacts with) WP_103138325_3	45.61
318	10	58.537	1	interacts with	WP_011610106_2 (interacts with) WP_124970176_14	46.15
320	12	63.158	1	interacts with	WP_011610106_2 (interacts with) WP_017748579_3	42.11
322	14	68.421	1	interacts with	WP_011610106_2 (interacts with) WP_006197379_2	45.61
324	12	45.614	1	interacts with	WP_011610106_2 (interacts with) WP_096689510_2	45.61
326	10	50.0	1	interacts with	WP_011610106_2 (interacts with) WP_138499827_1	40.35
328	16	58.491	1	interacts with	WP_011610106_2 (interacts with) WP_002735885_4	54.39
330	12	60.526	1	interacts with	WP_011610106_2 (interacts with) WP_096689510_5	40.35
332	11	57.895	1	interacts with	WP_011610106_2 (interacts with) WP_012595952_5	40.0
334	14	54.386	1	interacts with	WP_011610106_2 (interacts with) TRT88208_1	54.39
336	11	54.762	1	interacts with	WP_011610106_2 (interacts with) WP_138499827_5	40.35
338	11	67.647	0	interacts with	WP_011610106_2 (interacts with) WP_012409787_3	40.35
340	10	58.974	1	interacts with	WP_011610106_2 (interacts with) WP_086769105_3	40.35
342	8	44.231	1	interacts with	WP_011610106_2 (interacts with) WP_006513161_3	40.35
344	9	43.103	1	interacts with	WP_011610106_2 (interacts with) AVH79607_2	43.86
346	15	51.667	1	interacts with	WP_011610106_2 (interacts with) WP_138499827_4	54.39
347	13	65.789	0	interacts with	WP_011610106_2 (interacts with) WP_015155263_3	43.86
349	11	46.429	1	interacts with	WP_011610106_2 (interacts with) WP_086835908_1	45.61
350	14	63.415	1	interacts with	WP_011610106_2 (interacts with) OBQ01900_3	45.61
352	12	55.556	1	interacts with	WP_011610106_2 (interacts with) WP_017314970_2	43.86
354	11	45.614	1	interacts with	WP_011610106_2 (interacts with) WP_106240815_3	45.61
356	13	63.158	1	interacts with	WP_011610106_2 (interacts with) WP_096689510_6	42.11
358	12	55.556	1	interacts with	WP_011610106_2 (interacts with) WP_017314970_1	43.86
361	13	60.0	1	interacts with	WP_066371470_6 (interacts with) WP_062346719_1	51.92
363	4	44.0	1	interacts with	WP_066371470_6 (interacts with) WP_155349848_2	44.9
365	12	55.769	1	interacts with	WP_066371470_6 (interacts with) WP_155349848_3	55.77
367	7	58.824	1	interacts with	WP_066371470_6 (interacts with) WP_155358788_2	57.69
369	9	68.966	1	interacts with	WP_066371470_6 (interacts with) WP_062339008_4	40.82
371	9	72.414	1	interacts with	WP_066371470_6 (interacts with) WP_066371470_2	41.18
373	10	81.481	1	interacts with	WP_066371470_6 (interacts with) WP_062339008_5	45.83
375	12	54.902	1	interacts with	WP_066371470_6 (interacts with) WP_066371470_1	51.85
377	14	68.0	1	interacts with	WP_066371470_6 (interacts with) WP_062339008_2	65.38
379	7	70.37	1	interacts with	WP_066371470_6 (interacts with) WP_066371470_7	42.22
381	12	64.103	1	interacts with	WP_066371470_6 (interacts with) WP_155358788_1	50.0
382	14	65.854	1	interacts with	WP_015216084_5 (interacts with) WP_138498533_4	45.76
383	9	44.444	1	interacts with	WP_015216084_5 (interacts with) WP_015212417_1	43.75
384	14	51.724	1	interacts with	WP_015216084_5 (interacts with) WP_167725682_2	46.87
386	13	40.625	1	interacts with	WP_015216084_5 (interacts with) WP_015207767_1	40.62
388	11	63.158	1	interacts with	WP_015216084_5 (interacts with) WP_096537472_3	42.11
389	8	43.548	1	interacts with	WP_015216084_5 (interacts with) WP_099071810_1	42.19
390	11	48.387	1	interacts with	WP_015216084_5 (interacts with) TAE59458_3	46.87
391	8	41.538	1	interacts with	WP_015216084_5 (interacts with) WP_096559014_4	42.19
392	9	43.077	1	interacts with	WP_015216084_5 (interacts with) WP_015212417_2	43.75
393	12	43.75	1	interacts with	WP_015216084_5 (interacts with) AVH79607_2	43.75
395	14	59.524	1	interacts with	WP_015216084_5 (interacts with) WP_015216084_6	41.67
397	14	55.357	1	interacts with	WP_015216084_5 (interacts with) WP_068385845_3	48.44
398	13	60.526	1	interacts with	WP_015216084_5 (interacts with) WP_124155194_2	44.23
399	8	42.188	1	interacts with	WP_015216084_5 (interacts with) RCJ14929_3	42.19
401	12	50.98	1	interacts with	WP_015216084_5 (interacts with) WP_015207767_4	43.33
402	9	42.308	1	interacts with	WP_015216084_5 (interacts with) WP_012597836_5	42.31
404	13	50.0	1	interacts with	WP_015216084_5 (interacts with) WP_087592205_6	45.28
405	11	43.75	1	interacts with	WP_015216084_5 (interacts with) WP_096569967_5	43.75
407	13	40.625	1	interacts with	WP_015216084_5 (interacts with) WP_015207763_1	40.62
408	7	40.625	1	interacts with	WP_015216084_5 (interacts with) WP_073644071_5	40.62
409	8	56.41	1	interacts with	WP_015216084_5 (interacts with) WP_124970176_14	42.31
410	12	40.625	1	interacts with	WP_015216084_5 (interacts with) WP_006197379_2	45.61
411	14	56.863	1	interacts with	WP_015216084_5 (interacts with) WP_096689510_2	45.31
412	9	40.0	1	interacts with	WP_015216084_5 (interacts with) WP_006195640_7	40.62
413	14	56.522	1	interacts with	WP_015216084_5 (interacts with) WP_017314970_2	40.63
414	10	46.875	1	interacts with	WP_015216084_5 (interacts with) WP_099071810_6	46.88
416	11	46.0	1	interacts with	WP_015216084_5 (interacts with) WP_027843178_3	40.35
418	11	46.97	1	interacts with	WP_015216084_5 (interacts with) WP_106289349_2	48.44
421	48	94.521	1	interacts with	WP_138689268_3 (interacts with) WP_138666048_2	94.52
423	10	43.636	1	interacts with	WP_138689268_3 (interacts with) WP_052856102_3	41.38
425	11	46.154	1	interacts with	WP_138689268_3 (interacts with) WP_079181075_4	49.18
427	10	41.538	1	interacts with	WP_138689268_3 (interacts with) WP_079189213_2	45.0
429	48	94.521	1	interacts with	WP_138689268_3 (interacts with) WP_127931424_2	94.52
431	4	45.238	1	interacts with	WP_138689268_3 (interacts with) WP_049976882_1	41.3
434	26	61.538	1	interacts with	WP_167721203_10 (interacts with) WP_168643398_7	61.54
436	7	44.828	1	interacts with	WP_167721203_10 (interacts with) WP_070396036_1	40.0
438	10	44.615	1	interacts with	WP_167721203_10 (interacts with) WP_099700413_2	44.62
440	39	87.692	1	interacts with	WP_167721203_10 (interacts with) WP_086760950_11	87.69
442	10	44.615	1	interacts with	WP_167721203_10 (interacts with) WP_099700413_4	44.62
444	38	86.154	1	interacts with	WP_167721203_10 (interacts with) WP_096589596_10	86.15
445	27	60.811	1	interacts with	WP_096536886_5 (interacts with) WP_096559014_1	59.21
448	12	48.98	1	interacts with	WP_079191916_3 (interacts with) WP_052680420_4	43.64
450	10	52.174	1	interacts with	WP_079191916_3 (interacts with) WP_051708270_1	43.64
452	10	46.939	1	interacts with	WP_079191916_3 (interacts with) WP_051837683_4	41.82
454	12	48.889	1	interacts with	WP_079191916_3 (interacts with) WP_079191916_2	40.0
456	6	46.341	1	interacts with	WP_079191916_3 (interacts with) WP_107777750_1	41.3
458	6	45.763	1	interacts with	WP_079191916_3 (interacts with) ALC22075_5	49.09
460	8	43.75	1	interacts with	WP_079191916_3 (interacts with) WP_133890759_3	41.18
462	10	52.273	1	interacts with	WP_079191916_3 (interacts with) WP_109595189_5	41.82
464	11	43.333	1	interacts with	WP_079191916_3 (interacts with) WP_157846946_1	47.27
466	11	44.898	1	interacts with	WP_079191916_3 (interacts with) WP_051837683_5	40.0
468	11	44.898	1	interacts with	WP_079191916_3 (interacts with) WP_052680420_3	40.0
470	11	44.898	1	interacts with	WP_079191916_3 (interacts with) WP_051700182_4	40.0
472	28	76.364	1	interacts with	WP_079191916_3 (interacts with) WP_157846946_2	76.36
474	="0.008"	43.75	1	interacts with	WP_079191916_3 (interacts with) WP_055704502_1	50.91
476	14	51.471	1	interacts with	WP_079191916_3 (interacts with) WP_052856102_2	63.64
478	="0.065"	46.809	1	interacts with	WP_079191916_3 (interacts with) WP_109595189_2	40.0
480	="0.024"	48.936	1	interacts with	WP_079191916_3 (interacts with) WP_093619522_5	41.82
482	10	47.059	1	interacts with	WP_079191916_3 (interacts with) WP_051700182_2	43.64
484	10	46.939	1	interacts with	WP_079191916_3 (interacts with) WP_052680420_2	41.82
486	9	46.939	1	interacts with	WP_079191916_3 (interacts with) WP_055704502_2	41.82
488	5	46.875	1	interacts with	WP_079191916_3 (interacts with) WP_130878496_1	54.55
490	10	50.0	1	interacts with	WP_079191916_3 (interacts with) WP_093619522_1	40.0
492	11	53.333	1	interacts with	WP_079191916_3 (interacts with) WP_093619522_4	43.64
494	7	43.75	1	interacts with	WP_079191916_3 (interacts with) WP_133890759_2	41.18
495	12	52.083	1	interacts with	WP_079191916_3 (interacts with) WP_079189213_2	45.45
497	7	53.061	1	interacts with	WP_079191916_3 (interacts with) WP_145487439_1	47.27
499	11	50.0	1	interacts with	WP_079191916_3 (interacts with) WP_109595189_1	40.0
501	="0.019"	43.75	1	interacts with	WP_079191916_3 (interacts with) WP_145487439_2	50.91
503	4	48.148	1	interacts with	WP_079191916_3 (interacts with) WP_104258544_2	47.27
505	8	50.0	1	interacts with	WP_079191916_3 (interacts with) WP_170198719_1	40.0
508	23	76.364	1	interacts with	WP_019505167_1 (interacts with) WP_019505167_3	66.67
510	24	78.182	1	interacts with	WP_019505167_1 (interacts with) WP_019505167_2	68.25
512	10	53.488	1	interacts with	WP_086769105_5 (interacts with) WP_096537472_3	40.35
513	13	53.448	1	interacts with	WP_086769105_5 (interacts with) WP_086769105_3	44.93
514	12	48.571	1	interacts with	WP_086769105_5 (interacts with) WP_087542717_3	46.57
515	11	42.373	1	interacts with	WP_086769105_5 (interacts with) WP_138499827_4	41.67
518	="0.002"	48.571	1	interacts with	WP_052269673_2 (interacts with) WP_136238412_3	41.46
521	25	86.957	1	interacts with	WP_019501955_13 (interacts with) WP_019501955_9007	58.82
523	10	44.444	1	interacts with	WP_019501955_13 (interacts with) WP_019501955_10	52.94
525	12	48.98	1	interacts with	ANS68054_2 (interacts with) WP_052680420_4	43.64
527	34	94.545	1	interacts with	ANS68054_2 (interacts with) WP_053706403_3	94.55
529	8	48.889	1	interacts with	ANS68054_2 (interacts with) AWS47415_3	40.0
531	12	48.889	1	interacts with	ANS68054_2 (interacts with) WP_053706403_2	40.0
532	11	50.0	1	interacts with	ANS68054_2 (interacts with) WP_051708270_1	47.27
534	10	44.928	1	interacts with	ANS68054_2 (interacts with) WP_106115031_4	56.36
536	12	51.111	1	interacts with	ANS68054_2 (interacts with) ANS68054_1	41.82
538	7	47.826	1	interacts with	ANS68054_2 (interacts with) WP_017198207_2	40.0
539	23	81.818	1	interacts with	ANS68054_2 (interacts with) WP_079191916_3	81.82
540	11	54.545	1	interacts with	ANS68054_2 (interacts with) WP_051837683_4	43.64
542	5	40.678	1	interacts with	ANS68054_2 (interacts with) ALC22075_1	43.64
544	10	42.373	1	interacts with	ANS68054_2 (interacts with) WP_130878496_5	45.45
546	5	47.826	1	interacts with	ANS68054_2 (interacts with) WP_093619522_3	40.0
547	6	45.238	1	interacts with	ANS68054_2 (interacts with) WP_107777750_1	41.3
548	6	45.763	1	interacts with	ANS68054_2 (interacts with) ALC22075_5	49.09
549	8	45.833	1	interacts with	ANS68054_2 (interacts with) WP_133890759_3	43.14
550	11	56.098	1	interacts with	ANS68054_2 (interacts with) WP_109595189_5	41.82
551	12	46.667	1	interacts with	ANS68054_2 (interacts with) WP_157846946_1	50.91
553	12	53.191	1	interacts with	ANS68054_2 (interacts with) WP_079181075_2	45.45
554	12	48.98	1	interacts with	ANS68054_2 (interacts with) WP_052680420_3	43.64
555	12	48.98	1	interacts with	ANS68054_2 (interacts with) WP_051837683_5	43.64
556	12	48.98	1	interacts with	ANS68054_2 (interacts with) WP_051700182_4	43.64
557	29	81.818	1	interacts with	ANS68054_2 (interacts with) WP_157846946_2	81.82
558	4	50.0	1	interacts with	ANS68054_2 (interacts with) WP_055704502_1	58.18
559	11	46.97	1	interacts with	ANS68054_2 (interacts with) WP_052856102_2	56.36
561	9	44.643	1	interacts with	ANS68054_2 (interacts with) WP_158686821_1	45.45
562	="0.002"	51.064	1	interacts with	ANS68054_2 (interacts with) WP_109595189_2	43.64
563	4	53.191	1	interacts with	ANS68054_2 (interacts with) WP_093619522_5	45.45
565	10	47.826	1	interacts with	ANS68054_2 (interacts with) SNT25203_1	60.0
566	12	62.222	1	interacts with	ANS68054_2 (interacts with) WP_051700182_2	50.91
568	10	47.826	1	interacts with	ANS68054_2 (interacts with) AWS47415_2	60.0
570	10	68.75	0	interacts with	ANS68054_2 (interacts with) WP_052680420_1	40.0
572	8	48.889	1	interacts with	ANS68054_2 (interacts with) SNT25203_4	40.0
574	12	48.485	1	interacts with	ANS68054_2 (interacts with) WP_016570561_2	58.18
575	4	51.562	1	interacts with	ANS68054_2 (interacts with) WP_130878496_1	60.0
577	11	59.574	1	interacts with	ANS68054_2 (interacts with) WP_051837683_3	50.91
578	9	48.333	1	interacts with	ANS68054_2 (interacts with) WP_055704502_2	52.73
579	11	54.545	1	interacts with	ANS68054_2 (interacts with) WP_052680420_2	43.64
580	11	54.545	1	interacts with	ANS68054_2 (interacts with) WP_093619522_1	43.64
581	10	56.098	1	interacts with	ANS68054_2 (interacts with) WP_093619522_4	41.82
583	4	44.068	1	interacts with	ANS68054_2 (interacts with) WP_130878496_2	47.27
584	10	50.0	1	interacts with	ANS68054_2 (interacts with) WP_052856102_3	49.09
585	7	45.833	1	interacts with	ANS68054_2 (interacts with) WP_133890759_2	43.14
586	11	54.762	1	interacts with	ANS68054_2 (interacts with) WP_079181075_4	41.82
587	14	60.417	1	interacts with	ANS68054_2 (interacts with) WP_079189213_2	52.73
588	12	54.545	1	interacts with	ANS68054_2 (interacts with) WP_109595189_1	43.64
589	8	59.184	1	interacts with	ANS68054_2 (interacts with) WP_145487439_1	52.73
591	10	68.75	0	interacts with	ANS68054_2 (interacts with) WP_051700182_1	40.0
593	11	44.615	1	interacts with	ANS68054_2 (interacts with) PZN41733_2	52.73
595	11	60.976	1	interacts with	ANS68054_2 (interacts with) WP_016570561_1	45.45
596	4	50.0	1	interacts with	ANS68054_2 (interacts with) WP_145487439_2	58.18
598	7	48.936	1	interacts with	ANS68054_2 (interacts with) WP_159425899_2	41.82
600	24	71.429	1	interacts with	ANS68054_2 (interacts with) WP_051708270_2	72.73
601	9	47.458	1	interacts with	ANS68054_2 (interacts with) WP_170198719_1	50.91
603	22	55.0	1	interacts with	WP_089091039_1 (interacts with) WP_162399505_1	57.14
604	29	61.728	1	interacts with	WP_089091039_1 (interacts with) WP_096559014_1	65.79
606	11	43.902	1	interacts with	WP_089091039_1 (interacts with) WP_103136595_2	43.9
608	35	71.25	1	interacts with	WP_089091039_1 (interacts with) TVP62740_2	73.08
610	12	44.578	1	interacts with	WP_089091039_1 (interacts with) WP_069073064_4	48.05
611	23	53.086	1	interacts with	WP_089091039_1 (interacts with) WP_096536886_5	56.58
612	28	65.0	1	interacts with	WP_089091039_1 (interacts with) WP_015212417_1	66.67
613	33	68.75	1	interacts with	WP_089091039_1 (interacts with) WP_006195640_4	67.07
614	24	56.25	1	interacts with	WP_089091039_1 (interacts with) WP_099071810_2	58.44
615	21	58.025	1	interacts with	WP_089091039_1 (interacts with) WP_015113151_1	58.03
616	30	65.432	1	interacts with	WP_089091039_1 (interacts with) WP_096559014_5	66.25
618	21	51.25	1	interacts with	WP_089091039_1 (interacts with) WP_009343975_2	53.95
620	13	47.561	1	interacts with	WP_089091039_1 (interacts with) WP_038089561_2	47.56
622	12	40.741	1	interacts with	WP_089091039_1 (interacts with) WP_103136595_3	40.24
624	11	40.964	1	interacts with	WP_089091039_1 (interacts with) WP_015139846_1	41.46
625	14	43.902	1	interacts with	WP_089091039_1 (interacts with) WP_073639381_1	50.0
627	23	54.545	1	interacts with	WP_089091039_1 (interacts with) WP_015113151_4	58.54
629	23	58.75	1	interacts with	WP_089091039_1 (interacts with) WP_057178590_1	60.26
631	25	58.025	1	interacts with	WP_089091039_1 (interacts with) WP_096575011_4	57.32
632	10	52.273	1	interacts with	WP_089091039_1 (interacts with) WP_096537472_3	40.35
633	34	67.47	1	interacts with	WP_089091039_1 (interacts with) CEJ45116_2	68.29
634	22	59.259	1	interacts with	WP_089091039_1 (interacts with) WP_062295185_1	58.54
635	10	43.75	1	interacts with	WP_089091039_1 (interacts with) WP_087539234_4	42.68
636	18	50.0	1	interacts with	WP_089091039_1 (interacts with) CEJ45116_5	48.78
638	27	62.5	1	interacts with	WP_089091039_1 (interacts with) WP_015212417_3	64.1
640	12	45.122	1	interacts with	WP_089091039_1 (interacts with) WP_066383651_3	45.12
642	13	46.429	1	interacts with	WP_089091039_1 (interacts with) TAE59458_1	49.37
643	24	56.79	1	interacts with	WP_089091039_1 (interacts with) WP_099071810_1	60.53
644	19	52.5	1	interacts with	WP_089091039_1 (interacts with) WP_009343975_1	53.85
645	11	44.048	1	interacts with	WP_089091039_1 (interacts with) WP_087539234_7	45.12
646	30	66.667	1	interacts with	WP_089091039_1 (interacts with) WP_016950446_1	65.85
647	30	65.432	1	interacts with	WP_089091039_1 (interacts with) WP_096559014_4	66.25
648	26	62.5	1	interacts with	WP_089091039_1 (interacts with) WP_013190203_1	64.94
650	26	58.025	1	interacts with	WP_089091039_1 (interacts with) WP_016950446_3	59.49
651	11	44.578	1	interacts with	WP_089091039_1 (interacts with) OBQ18754_2	45.12
652	23	56.322	1	interacts with	WP_089091039_1 (interacts with) WP_096575011_6	59.76
654	10	46.809	1	interacts with	WP_089091039_1 (interacts with) WP_096537472_5	40.0
655	28	65.0	1	interacts with	WP_089091039_1 (interacts with) WP_015212417_2	66.67
656	27	61.25	1	interacts with	WP_089091039_1 (interacts with) WP_071189061_3	64.47
657	24	56.79	1	interacts with	WP_089091039_1 (interacts with) RCJ30949_2	58.97
659	33	72.5	1	interacts with	WP_089091039_1 (interacts with) WP_089091039_4	75.32
660	12	47.561	1	interacts with	WP_089091039_1 (interacts with) WP_069073064_1	47.56
661	12	48.077	1	interacts with	WP_089091039_1 (interacts with) OBQ01900_3	42.37
662	34	67.47	1	interacts with	WP_089091039_1 (interacts with) CEJ45116_1	68.29
664	24	56.79	1	interacts with	WP_089091039_1 (interacts with) WP_062295185_6	56.79
665	37	75.0	1	interacts with	WP_089091039_1 (interacts with) TVP62740_1	75.95
666	25	59.259	1	interacts with	WP_089091039_1 (interacts with) WP_096536886_1	63.16
668	24	58.75	1	interacts with	WP_089091039_1 (interacts with) WP_096536886_4	59.49
669	24	56.79	1	interacts with	WP_089091039_1 (interacts with) WP_096575011_3	56.1
670	15	49.383	1	interacts with	WP_089091039_1 (interacts with) WP_168496018_1	48.78
672	27	61.728	1	interacts with	WP_089091039_1 (interacts with) RCJ30949_6	65.79
674	12	53.191	1	interacts with	WP_089091039_1 (interacts with) WP_099068319_6	45.45
675	28	61.728	1	interacts with	WP_089091039_1 (interacts with) RCJ30949_4	65.79
677	13	42.857	1	interacts with	WP_089091039_1 (interacts with) WP_137906310_1	43.9
679	15	47.561	1	interacts with	WP_089091039_1 (interacts with) WP_104387267_1	47.56
680	11	43.373	1	interacts with	WP_089091039_1 (interacts with) WP_069073064_5	48.65
682	30	66.667	1	interacts with	WP_089091039_1 (interacts with) WP_096559014_6	67.5
683	25	55.556	1	interacts with	WP_089091039_1 (interacts with) RCJ14929_3	60.0
685	12	46.341	1	interacts with	WP_089091039_1 (interacts with) WP_038089561_1	46.34
687	26	55.556	1	interacts with	WP_089091039_1 (interacts with) RCJ14929_1	59.21
688	5	42.254	1	interacts with	WP_089091039_1 (interacts with) WP_015216084_10	43.48
689	34	80.0	1	interacts with	WP_089091039_1 (interacts with) WP_089091039_2	81.01
690	11	41.975	1	interacts with	WP_089091039_1 (interacts with) BAZ29283_3	43.04
692	23	53.086	1	interacts with	WP_089091039_1 (interacts with) WP_073644071_4	57.33
694	12	42.683	1	interacts with	WP_089091039_1 (interacts with) WP_066383651_6	44.3
695	11	42.857	1	interacts with	WP_089091039_1 (interacts with) OBQ36138_1	43.9
696	26	58.025	1	interacts with	WP_089091039_1 (interacts with) WP_096569967_3	62.67
698	31	69.048	1	interacts with	WP_089091039_1 (interacts with) WP_006195640_9	70.73
700	10	43.75	1	interacts with	WP_089091039_1 (interacts with) WP_087539234_3	42.68
701	26	61.728	1	interacts with	WP_089091039_1 (interacts with) WP_096569967_5	64.93
703	33	68.75	1	interacts with	WP_089091039_1 (interacts with) WP_006195640_5	67.07
704	21	72.727	1	interacts with	WP_089091039_1 (interacts with) TVP62740_6	74.07
706	11	44.578	1	interacts with	WP_089091039_1 (interacts with) WP_069073064_7	48.05
708	21	51.852	1	interacts with	WP_089091039_1 (interacts with) WP_006195640_8	51.85
709	25	58.75	1	interacts with	WP_089091039_1 (interacts with) WP_096569967_4	61.84
710	9	41.463	1	interacts with	WP_089091039_1 (interacts with) WP_044449859_1	49.27
712	22	56.471	1	interacts with	WP_089091039_1 (interacts with) WP_062295185_4	58.54
713	33	66.265	1	interacts with	WP_089091039_1 (interacts with) WP_006195640_2	67.07
714	11	44.578	1	interacts with	WP_089091039_1 (interacts with) WP_168465654_1	45.12
715	25	56.79	1	interacts with	WP_089091039_1 (interacts with) WP_073644071_5	61.33
716	27	62.5	1	interacts with	WP_089091039_1 (interacts with) WP_071189061_2	65.79
717	27	60.494	1	interacts with	WP_089091039_1 (interacts with) WP_096559014_8	62.03
718	41	82.5	1	interacts with	WP_089091039_1 (interacts with) WP_006195640_7	84.62
720	11	45.0	1	interacts with	WP_089091039_1 (interacts with) WP_087539234_6	43.9
721	12	46.914	1	interacts with	WP_089091039_1 (interacts with) WP_066383651_2	46.34
722	31	69.048	1	interacts with	WP_089091039_1 (interacts with) WP_089091039_3	70.73
724	19	48.148	1	interacts with	WP_089091039_1 (interacts with) WP_073644071_8	53.42
726	26	60.494	1	interacts with	WP_089091039_1 (interacts with) WP_073644071_2	64.47
728	11	46.552	1	interacts with	WP_089091039_1 (interacts with) WP_096537472_2	44.26
729	20	55.556	1	interacts with	WP_089091039_1 (interacts with) WP_096575011_2	54.88
730	28	61.728	1	interacts with	WP_089091039_1 (interacts with) RCJ30949_5	65.79
732	11	41.25	1	interacts with	WP_089091039_1 (interacts with) WP_096620064_1	40.24
733	11	52.83	1	interacts with	WP_089091039_1 (interacts with) WP_017314970_2	43.08
734	23	54.321	1	interacts with	WP_089091039_1 (interacts with) WP_099071810_6	57.89
736	13	50.617	1	interacts with	WP_089091039_1 (interacts with) WP_087539234_2	50.0
738	17	58.182	1	interacts with	WP_096589596_4 (interacts with) WP_138498533_4	54.24
739	14	41.667	1	interacts with	WP_096589596_4 (interacts with) WP_103138325_3	42.25
741	40	81.69	1	interacts with	WP_096589596_4 (interacts with) WP_167721203_3	81.69
743	11	44.118	1	interacts with	WP_096589596_4 (interacts with) AVH79628_3	42.86
745	16	65.854	1	interacts with	WP_096589596_4 (interacts with) WP_015216084_7	45.76
746	17	50.877	1	interacts with	WP_096589596_4 (interacts with) TRT88208_1	49.15
748	42	85.915	1	interacts with	WP_096589596_4 (interacts with) WP_086760950_4	85.92
749	18	58.182	1	interacts with	WP_096589596_4 (interacts with) WP_086835908_1	54.24
750	12	58.974	1	interacts with	WP_096589596_4 (interacts with) WP_096537472_3	40.35
752	15	40.244	1	interacts with	WP_096589596_4 (interacts with) RCJ19623_1	46.48
753	16	65.854	1	interacts with	WP_096589596_4 (interacts with) WP_015216084_6	45.0
755	45	91.549	1	interacts with	WP_096589596_4 (interacts with) WP_167721203_2	91.55
757	40	84.507	1	interacts with	WP_096589596_4 (interacts with) WP_104899482_2	84.51
759	21	50.704	1	interacts with	WP_096589596_4 (interacts with) WP_019501037_1	50.7
761	7	42.857	1	interacts with	RCJ19623_5 (interacts with) WP_124970176_14	40.38
763	13	43.478	1	interacts with	RCJ19623_5 (interacts with) AVH79456_4	42.86
766	13	66.667	0	interacts with	WP_019495762_1 (interacts with) WP_099068319_4	42.62
768	11	56.098	0	interacts with	WP_019495762_1 (interacts with) WP_027845719_1	40.35
769	11	55.263	0	interacts with	WP_019495762_1 (interacts with) WP_124155194_2	40.38
770	15	55.556	1	interacts with	WP_019495762_1 (interacts with) WP_138498533_4	50.85
771	15	48.276	1	interacts with	WP_019495762_1 (interacts with) WP_015216084_5	43.75
773	14	68.421	0	interacts with	WP_019495762_1 (interacts with) BAZ42602_1	40.0
774	15	64.444	1	interacts with	WP_019495762_1 (interacts with) WP_167721203_3	40.84
776	12	44.118	1	interacts with	WP_019495762_1 (interacts with) WP_017318973_3	42.25
777	17	48.148	1	interacts with	WP_019495762_1 (interacts with) WP_163927072_1	46.99
779	15	48.571	1	interacts with	WP_019495762_1 (interacts with) AVH79456_3	50.0
780	29	66.667	1	interacts with	WP_019495762_1 (interacts with) WP_109013279_1	71.05
781	14	69.231	0	interacts with	WP_019495762_1 (interacts with) WP_096537472_3	47.37
782	18	53.165	1	interacts with	WP_019495762_1 (interacts with) RCJ19623_1	51.22
783	13	45.614	1	interacts with	WP_019495762_1 (interacts with) WP_087592205_6	49.06
784	14	68.421	0	interacts with	WP_019495762_1 (interacts with) WP_127086205_3	41.94
785	15	50.746	1	interacts with	WP_019495762_1 (interacts with) WP_019501037_1	47.89
786	14	60.976	0	interacts with	WP_019495762_1 (interacts with) WP_099068319_5	43.1
787	9	51.923	1	interacts with	WP_019495762_1 (interacts with) WP_124970176_14	51.92
788	11	58.974	0	interacts with	WP_019495762_1 (interacts with) WP_006197379_2	40.35
789	14	53.425	1	interacts with	WP_019495762_1 (interacts with) WP_138499827_1	48.15
791	12	41.333	1	interacts with	WP_019495762_1 (interacts with) WP_106300787_1	44.93
792	14	68.421	0	interacts with	WP_019495762_1 (interacts with) WP_002735885_4	42.62
793	14	55.932	1	interacts with	WP_019495762_1 (interacts with) WP_015216084_7	55.93
794	11	57.895	0	interacts with	WP_019495762_1 (interacts with) WP_012595952_5	40.0
796	11	56.098	0	interacts with	WP_019495762_1 (interacts with) WP_027843178_2	40.35
797	14	50.98	1	interacts with	WP_019495762_1 (interacts with) WP_138499827_5	43.33
798	14	53.704	1	interacts with	WP_019495762_1 (interacts with) WP_086835908_1	49.15
799	15	55.738	1	interacts with	WP_019495762_1 (interacts with) WP_015216084_6	56.67
800	13	71.053	0	interacts with	WP_019495762_1 (interacts with) WP_017314970_1	41.54
801	11	56.098	0	interacts with	WP_019495762_1 (interacts with) WP_027843178_3	40.35
803	44	93.976	1	interacts with	WP_019495762_1 (interacts with) WP_127078868_1	93.98
805	29	67.949	1	interacts with	WP_019495762_1 (interacts with) WP_096688632_1	67.09
807	6	46.341	1	interacts with	WP_052808529_1 (interacts with) WP_053706403_3	41.3
808	6	43.478	1	interacts with	WP_052808529_1 (interacts with) AWS47415_3	43.48
810	30	97.826	1	interacts with	WP_052808529_1 (interacts with) WP_164394909_1	97.83
812	9	41.304	1	interacts with	WP_052808529_1 (interacts with) WP_068150862_3	41.3
813	5	45.238	1	interacts with	WP_052808529_1 (interacts with) WP_138689268_3	41.3
815	7	47.826	1	interacts with	WP_052808529_1 (interacts with) PZN41733_3	47.83
816	9	46.341	1	interacts with	WP_052808529_1 (interacts with) ANS68054_1	41.3
818	6	45.455	1	interacts with	WP_052808529_1 (interacts with) WP_170198719_2	43.48
820	4	45.238	1	interacts with	WP_052808529_1 (interacts with) WP_091097544_2	41.3
821	7	44.186	1	interacts with	WP_052808529_1 (interacts with) WP_051837683_4	41.3
822	5	58.333	1	interacts with	WP_052808529_1 (interacts with) ALC22075_1	45.65
823	="0.002"	47.826	1	interacts with	WP_052808529_1 (interacts with) WP_093619522_3	47.83
824	25	84.783	1	interacts with	WP_052808529_1 (interacts with) WP_107777750_1	84.78
826	7	40.0	1	interacts with	WP_052808529_1 (interacts with) WP_139979956_2	43.48
828	6	50.0	1	interacts with	WP_052808529_1 (interacts with) WP_015659226_4	50.0
829	5	50.0	1	interacts with	WP_052808529_1 (interacts with) WP_133890759_3	41.3
831	5	41.176	1	interacts with	WP_052808529_1 (interacts with) WP_078760724_1	45.65
832	7	51.282	1	interacts with	WP_052808529_1 (interacts with) WP_079181075_2	43.48
834	7	48.718	1	interacts with	WP_052808529_1 (interacts with) WP_159688203_1	41.3
835	7	47.5	1	interacts with	WP_052808529_1 (interacts with) WP_157846946_2	41.3
836	7	46.512	1	interacts with	WP_052808529_1 (interacts with) WP_051700182_2	43.48
837	30	100.0	1	interacts with	WP_052808529_1 (interacts with) WP_049976882_1	100.0
839	12	51.111	1	interacts with	WP_052808529_1 (interacts with) WP_068150862_2	50.0
840	4	45.238	1	interacts with	WP_052808529_1 (interacts with) WP_138666048_2	41.3
841	6	43.182	1	interacts with	WP_052808529_1 (interacts with) WP_051837683_3	41.3
842	5	50.0	1	interacts with	WP_052808529_1 (interacts with) WP_133890759_2	41.3
843	7	45.455	1	interacts with	WP_052808529_1 (interacts with) WP_079189213_2	43.48
844	="0.018"	47.727	1	interacts with	WP_052808529_1 (interacts with) WP_145487439_1	45.65
845	4	45.238	1	interacts with	WP_052808529_1 (interacts with) WP_127931424_2	41.3
847	4	50.0	1	interacts with	WP_052808529_1 (interacts with) WP_060892878_4	43.48
848	9	48.718	1	interacts with	WP_052808529_1 (interacts with) WP_170198719_1	41.3
851	13	48.276	1	interacts with	WP_071107270_1 (interacts with) WP_027845719_2	49.12
853	13	67.5	0	interacts with	WP_071107270_1 (interacts with) BBD63560_2	41.54
854	13	60.465	0	interacts with	WP_071107270_1 (interacts with) WP_099068319_4	42.62
856	18	48.75	1	interacts with	WP_071107270_1 (interacts with) WP_096580419_3	48.75
857	13	48.276	1	interacts with	WP_071107270_1 (interacts with) WP_027845719_1	49.12
859	17	50.633	1	interacts with	WP_071107270_1 (interacts with) WP_035150190_4	51.95
860	11	45.614	1	interacts with	WP_071107270_1 (interacts with) WP_011610106_2	45.61
861	9	45.455	1	interacts with	WP_071107270_1 (interacts with) WP_096728455_2	42.37
863	13	65.0	0	interacts with	WP_071107270_1 (interacts with) WP_053455886_3	40.0
865	10	43.662	1	interacts with	WP_071107270_1 (interacts with) WP_006513161_2	44.93
867	12	60.976	0	interacts with	WP_071107270_1 (interacts with) WP_099068319_2	40.98
869	11	41.333	1	interacts with	WP_071107270_1 (interacts with) WP_096688632_2	44.29
871	16	48.75	1	interacts with	WP_071107270_1 (interacts with) WP_015197629_3	49.37
872	11	40.0	1	interacts with	WP_071107270_1 (interacts with) TVP62740_2	43.59
874	14	67.5	0	interacts with	WP_071107270_1 (interacts with) RCJ40850_1	41.54
876	14	46.97	1	interacts with	WP_071107270_1 (interacts with) WP_169219633_3	40.26
878	13	67.5	0	interacts with	WP_071107270_1 (interacts with) RCJ40850_2	41.54
880	9	46.154	1	interacts with	WP_071107270_1 (interacts with) AVH79535_2	46.15
882	14	67.5	0	interacts with	WP_071107270_1 (interacts with) WP_053455886_1	41.54
884	14	67.5	0	interacts with	WP_071107270_1 (interacts with) BBD63560_4	41.54
885	14	48.718	1	interacts with	WP_071107270_1 (interacts with) WP_087542717_3	52.05
887	15	53.03	1	interacts with	WP_071107270_1 (interacts with) WP_068385845_2	46.67
888	10	51.22	0	interacts with	WP_071107270_1 (interacts with) WP_012597836_5	40.38
889	16	73.171	0	interacts with	WP_071107270_1 (interacts with) WP_096580419_1	40.0
890	10	51.22	0	interacts with	WP_071107270_1 (interacts with) WP_012597836_4	40.38
892	12	44.444	1	interacts with	WP_071107270_1 (interacts with) WP_088242795_2	43.84
894	11	56.098	0	interacts with	WP_071107270_1 (interacts with) WP_011610106_1	44.23
895	12	41.667	1	interacts with	WP_071107270_1 (interacts with) WP_006195640_9	41.18
897	14	67.5	0	interacts with	WP_071107270_1 (interacts with) BBD63560_3	41.54
898	19	60.938	1	interacts with	WP_071107270_1 (interacts with) WP_070396036_3	46.43
900	15	49.254	1	interacts with	WP_071107270_1 (interacts with) WP_015189896_3	43.42
902	15	48.193	1	interacts with	WP_071107270_1 (interacts with) WP_068385845_4	53.33
904	17	55.0	1	interacts with	WP_071107270_1 (interacts with) WP_169219633_1	57.14
905	11	61.538	0	interacts with	WP_071107270_1 (interacts with) WP_099068319_5	41.38
907	10	51.22	0	interacts with	WP_071107270_1 (interacts with) WP_012597836_3	40.38
909	13	48.276	1	interacts with	WP_071107270_1 (interacts with) WP_027845719_3	49.12
911	8	46.429	1	interacts with	WP_071107270_1 (interacts with) WP_124970176_11	44.07
913	11	51.163	0	interacts with	WP_071107270_1 (interacts with) WP_012597836_6	42.31
915	11	51.163	0	interacts with	WP_071107270_1 (interacts with) WP_012597836_7	42.31
917	10	42.254	1	interacts with	WP_071107270_1 (interacts with) WP_163670238_2	42.86
919	12	41.053	1	interacts with	WP_071107270_1 (interacts with) WP_105222244_3	41.49
920	9	53.846	0	interacts with	WP_071107270_1 (interacts with) WP_124970176_14	40.38
922	15	50.0	1	interacts with	WP_071107270_1 (interacts with) WP_106240815_1	50.0
923	15	50.0	1	interacts with	WP_071107270_1 (interacts with) WP_106240815_2	50.0
924	15	48.148	1	interacts with	WP_071107270_1 (interacts with) WP_017748579_3	51.32
925	13	50.909	1	interacts with	WP_071107270_1 (interacts with) WP_096537472_5	50.91
927	13	63.415	0	interacts with	WP_071107270_1 (interacts with) WP_073643028_3	50.0
929	16	50.617	1	interacts with	WP_071107270_1 (interacts with) WP_015197629_1	52.56
931	14	67.5	0	interacts with	WP_071107270_1 (interacts with) WP_053455886_2	41.54
933	13	48.276	1	interacts with	WP_071107270_1 (interacts with) WP_027843178_1	49.12
934	13	43.421	1	interacts with	WP_071107270_1 (interacts with) WP_087539234_6	40.24
936	15	66.667	1	interacts with	WP_071107270_1 (interacts with) WP_017748579_1	43.84
937	13	56.604	1	interacts with	WP_071107270_1 (interacts with) WP_096689510_5	46.15
938	13	48.276	1	interacts with	WP_071107270_1 (interacts with) WP_027843178_2	49.12
940	11	58.974	0	interacts with	WP_071107270_1 (interacts with) OBQ01900_2	41.82
941	12	41.667	1	interacts with	WP_071107270_1 (interacts with) WP_089091039_3	41.18
943	19	73.913	0	interacts with	WP_071107270_1 (interacts with) WP_071107270_2	40.48
944	12	50.0	1	interacts with	WP_071107270_1 (interacts with) WP_138499827_4	40.0
945	13	63.415	0	interacts with	WP_071107270_1 (interacts with) WP_096537472_2	42.62
946	11	58.14	0	interacts with	WP_071107270_1 (interacts with) OBQ01900_3	42.37
948	14	44.578	1	interacts with	WP_071107270_1 (interacts with) WP_015210601_2	41.11
949	17	49.367	1	interacts with	WP_071107270_1 (interacts with) WP_068385845_3	52.0
950	14	50.746	1	interacts with	WP_071107270_1 (interacts with) WP_096689510_6	53.12
951	13	48.276	1	interacts with	WP_071107270_1 (interacts with) WP_027843178_3	49.12
953	15	55.882	1	interacts with	WP_071107270_1 (interacts with) WP_087542717_5	50.67
955	11	61.538	0	interacts with	WP_071107270_1 (interacts with) WP_099068319_7	42.86
957	14	67.5	0	interacts with	WP_071107270_1 (interacts with) BBD63560_1	41.54
958	22	55.294	1	interacts with	WP_015113151_4 (interacts with) WP_162399505_1	61.04
959	22	56.818	1	interacts with	WP_015113151_4 (interacts with) WP_096559014_1	65.79
960	12	40.741	1	interacts with	WP_015113151_4 (interacts with) WP_066383651_5	40.74
961	20	49.412	1	interacts with	WP_015113151_4 (interacts with) WP_096536886_5	55.26
962	19	52.941	1	interacts with	WP_015113151_4 (interacts with) WP_015212417_1	57.69
963	20	50.617	1	interacts with	WP_015113151_4 (interacts with) WP_006195640_4	49.4
964	19	51.852	1	interacts with	WP_015113151_4 (interacts with) WP_099071810_2	54.55
965	27	63.529	1	interacts with	WP_015113151_4 (interacts with) WP_015113151_1	66.67
966	20	50.0	1	interacts with	WP_015113151_4 (interacts with) WP_167725682_2	47.06
967	21	59.756	1	interacts with	WP_015113151_4 (interacts with) WP_096559014_5	61.25
968	18	48.837	1	interacts with	WP_015113151_4 (interacts with) BAZ29283_1	54.55
969	20	50.617	1	interacts with	WP_015113151_4 (interacts with) WP_096730381_2	48.24
970	17	44.578	1	interacts with	WP_015113151_4 (interacts with) WP_073639381_1	51.39
972	12	41.975	1	interacts with	WP_015113151_4 (interacts with) WP_138499068_4	40.0
973	20	49.412	1	interacts with	WP_015113151_4 (interacts with) CEJ45116_2	49.41
974	26	63.529	1	interacts with	WP_015113151_4 (interacts with) WP_062295185_1	65.06
975	17	43.21	1	interacts with	WP_015113151_4 (interacts with) WP_087539234_4	42.68
976	12	40.741	1	interacts with	WP_015113151_4 (interacts with) CEJ45116_5	40.24
977	21	51.765	1	interacts with	WP_015113151_4 (interacts with) WP_099071810_1	57.9
978	19	47.059	1	interacts with	WP_015113151_4 (interacts with) WP_009343975_1	51.28
979	13	43.678	1	interacts with	WP_015113151_4 (interacts with) TAE59458_3	48.1
980	20	54.762	1	interacts with	WP_015113151_4 (interacts with) WP_016950446_1	54.76
981	17	43.373	1	interacts with	WP_015113151_4 (interacts with) WP_087539234_7	43.9
982	21	59.756	1	interacts with	WP_015113151_4 (interacts with) WP_096559014_4	61.25
983	18	52.941	1	interacts with	WP_015113151_4 (interacts with) WP_013190203_1	58.44
984	53	92.941	1	interacts with	WP_015113151_4 (interacts with) WP_096575011_6	92.94
985	13	44.186	1	interacts with	WP_015113151_4 (interacts with) OBQ18754_2	45.78
986	20	51.765	1	interacts with	WP_015113151_4 (interacts with) WP_015212417_2	56.41
987	13	40.0	1	interacts with	WP_015113151_4 (interacts with) WP_011321056_1	42.5
988	14	45.122	1	interacts with	WP_015113151_4 (interacts with) WP_069073064_6	50.0
989	20	56.471	1	interacts with	WP_015113151_4 (interacts with) WP_071189061_3	63.16
990	15	44.444	1	interacts with	WP_015113151_4 (interacts with) RCJ30949_2	46.15
991	16	44.828	1	interacts with	WP_015113151_4 (interacts with) WP_069073064_1	45.88
992	20	49.412	1	interacts with	WP_015113151_4 (interacts with) CEJ45116_1	49.41
993	20	49.412	1	interacts with	WP_015113151_4 (interacts with) WP_096536886_1	55.26
994	20	54.321	1	interacts with	WP_015113151_4 (interacts with) TVP62740_1	55.7
995	16	44.706	1	interacts with	WP_015113151_4 (interacts with) BAZ29283_4	49.35
996	32	68.182	1	interacts with	WP_015113151_4 (interacts with) WP_096575011_3	70.59
997	13	41.975	1	interacts with	WP_015113151_4 (interacts with) WP_168496018_1	40.0
998	19	51.852	1	interacts with	WP_015113151_4 (interacts with) RCJ30949_4	55.26
999	11	43.21	1	interacts with	WP_015113151_4 (interacts with) WP_087539234_1	41.18
1001	12	41.975	1	interacts with	WP_015113151_4 (interacts with) WP_138499068_1	40.0
1002	14	43.333	1	interacts with	WP_015113151_4 (interacts with) WP_168645325_1	46.99
1003	12	40.476	1	interacts with	WP_015113151_4 (interacts with) WP_096681247_5	40.96
1004	15	46.341	1	interacts with	WP_015113151_4 (interacts with) WP_069073064_5	51.35
1005	21	52.941	1	interacts with	WP_015113151_4 (interacts with) RCJ14929_3	60.0
1006	18	51.852	1	interacts with	WP_015113151_4 (interacts with) WP_089091039_2	53.16
1007	13	41.975	1	interacts with	WP_015113151_4 (interacts with) WP_011321056_5	43.59
1009	13	43.21	1	interacts with	WP_015113151_4 (interacts with) WP_138499068_5	41.18
1010	16	47.619	1	interacts with	WP_015113151_4 (interacts with) BAZ29283_3	50.63
1011	18	50.617	1	interacts with	WP_015113151_4 (interacts with) OBQ36138_1	48.24
1012	19	48.235	1	interacts with	WP_015113151_4 (interacts with) WP_096569967_3	54.67
1013	21	48.235	1	interacts with	WP_015113151_4 (interacts with) WP_096569967_5	53.25
1014	6	44.643	1	interacts with	WP_015113151_4 (interacts with) TVP62740_6	46.3
1015	15	44.444	1	interacts with	WP_015113151_4 (interacts with) WP_044449859_1	52.17
1016	19	48.235	1	interacts with	WP_015113151_4 (interacts with) WP_096569967_4	53.95
1017	20	50.0	1	interacts with	WP_015113151_4 (interacts with) WP_006195640_2	49.41
1018	13	44.186	1	interacts with	WP_015113151_4 (interacts with) WP_168465654_1	44.71
1019	23	54.878	1	interacts with	WP_015113151_4 (interacts with) WP_073644071_5	60.0
1020	18	52.326	1	interacts with	WP_015113151_4 (interacts with) WP_071189061_2	59.21
1021	20	53.571	1	interacts with	WP_015113151_4 (interacts with) WP_096559014_8	56.96
1023	8	40.0	1	interacts with	WP_015113151_4 (interacts with) WP_044449859_3	40.51
1024	22	54.762	1	interacts with	WP_015113151_4 (interacts with) WP_006195640_7	58.97
1025	12	42.857	1	interacts with	WP_015113151_4 (interacts with) WP_066383651_2	43.9
1026	23	57.831	1	interacts with	WP_015113151_4 (interacts with) WP_089091039_3	56.47
1027	24	60.0	1	interacts with	WP_015113151_4 (interacts with) WP_096575011_2	62.2
1028	19	51.852	1	interacts with	WP_015113151_4 (interacts with) RCJ30949_5	55.26
1029	19	49.412	1	interacts with	WP_015113151_4 (interacts with) WP_099071810_6	55.26
1032	18	45.361	1	interacts with	AFY52807_3 (interacts with) AFY52807_4	47.83
1033	8	56.818	0	interacts with	AFY52807_3 (interacts with) WP_096537472_3	43.86
1035	11	51.923	1	interacts with	WP_169219633_2 (interacts with) WP_096689510_5	41.54
1036	9	48.077	1	interacts with	WP_169219633_2 (interacts with) WP_138499827_5	41.67
1037	14	44.444	1	interacts with	WP_169219633_2 (interacts with) WP_015197629_3	40.51
1038	11	45.763	1	interacts with	WP_169219633_2 (interacts with) WP_017314970_2	41.54
1039	10	58.14	0	interacts with	WP_169219633_2 (interacts with) WP_096537472_3	43.86
1040	12	50.0	1	interacts with	WP_169219633_2 (interacts with) WP_068385845_3	44.0
1041	12	48.387	1	interacts with	WP_169219633_2 (interacts with) WP_096689510_6	46.87
1042	10	47.059	1	interacts with	WP_169219633_2 (interacts with) WP_006197379_2	42.11
1043	11	49.153	1	interacts with	WP_169219633_2 (interacts with) WP_017314970_1	44.62
1045	20	75.0	1	interacts with	ANI93503_3 (interacts with) WP_068150862_2	71.74
1046	="5.8"	48.889	1	interacts with	ANI93503_3 (interacts with) WP_130878496_2	47.83
1048	30	100.0	1	interacts with	ANI93503_3 (interacts with) ANI93503_1	100.0
1050	27	93.478	1	interacts with	ANI93503_3 (interacts with) ANI93503_6	93.48
1051	="0.024"	46.341	1	interacts with	ANI93503_3 (interacts with) WP_157846946_2	41.3
1052	18	70.455	1	interacts with	ANI93503_3 (interacts with) WP_068150862_3	67.39
1054	5	42.222	1	interacts with	ANI93503_3 (interacts with) WP_125821548_1	41.3
1056	5	42.222	1	interacts with	ANI93503_3 (interacts with) WP_051840628_1	41.3
1059	14	56.364	1	interacts with	WP_128433866_2 (interacts with) WP_153461219_4	50.0
1060	6	40.984	1	interacts with	WP_128433866_2 (interacts with) WP_155349848_3	48.08
1062	12	49.231	1	interacts with	WP_128433866_2 (interacts with) WP_139627778_2	51.61
1063	7	44.444	1	interacts with	WP_128433866_2 (interacts with) WP_125821548_1	40.82
1065	7	43.103	1	interacts with	WP_128433866_2 (interacts with) WP_017198207_3	40.32
1066	7	41.379	1	interacts with	WP_128433866_2 (interacts with) WP_130878496_5	40.68
1068	11	49.231	1	interacts with	WP_128433866_2 (interacts with) WP_068210304_3	51.61
1070	13	48.387	1	interacts with	WP_128433866_2 (interacts with) WP_155862233_4	48.39
1072	10	42.857	1	interacts with	WP_128433866_2 (interacts with) WP_141936425_3	48.39
1074	12	47.826	1	interacts with	WP_128433866_2 (interacts with) WP_054237388_3	53.23
1076	16	53.846	1	interacts with	WP_128433866_2 (interacts with) WP_051851944_3	56.45
1078	9	41.667	1	interacts with	WP_128433866_2 (interacts with) WP_068210304_1	40.32
1079	7	44.444	1	interacts with	WP_128433866_2 (interacts with) WP_051840628_1	40.82
1080	5	47.826	1	interacts with	WP_128433866_2 (interacts with) WP_133890759_3	43.14
1082	9	55.556	1	interacts with	WP_128433866_2 (interacts with) WP_141936425_2	40.32
1084	17	56.452	1	interacts with	WP_128433866_2 (interacts with) WP_071383933_2	56.45
1086	7	42.857	1	interacts with	WP_128433866_2 (interacts with) WP_164312175_3	50.0
1088	4	43.75	1	interacts with	WP_128433866_2 (interacts with) AGP61345_4	44.68
1089	6	47.826	1	interacts with	WP_128433866_2 (interacts with) WP_133890759_2	43.14
1091	11	52.459	1	interacts with	WP_128433866_2 (interacts with) WP_083744359_2	51.61
1092	12	64.103	1	interacts with	WP_128433866_2 (interacts with) WP_060892878_4	40.32
1094	10	42.857	1	interacts with	WP_128433866_2 (interacts with) WP_030169499_4	43.55
1095	8	55.263	1	interacts with	WP_128433866_2 (interacts with) WP_136238412_3	51.22
1097	12	46.97	1	interacts with	WP_128433866_2 (interacts with) WP_153461219_3	50.0
1098	12	46.154	1	interacts with	WP_088242795_2 (interacts with) WP_035150190_4	41.1
1099	12	41.667	1	interacts with	WP_088242795_2 (interacts with) WP_162399505_1	41.1
1100	14	50.0	1	interacts with	WP_088242795_2 (interacts with) WP_087539234_1	50.68
1101	8	43.86	1	interacts with	WP_088242795_2 (interacts with) WP_096728455_2	42.37
1102	11	57.895	1	interacts with	WP_088242795_2 (interacts with) WP_124155194_2	42.31
1103	11	57.5	1	interacts with	WP_088242795_2 (interacts with) WP_011610106_2	40.35
1104	16	41.558	1	interacts with	WP_088242795_2 (interacts with) WP_137906310_1	43.84
1105	16	54.386	1	interacts with	WP_088242795_2 (interacts with) WP_015216084_5	48.44
1106	20	46.667	1	interacts with	WP_088242795_2 (interacts with) WP_104387267_1	47.95
1108	23	52.055	1	interacts with	WP_088242795_2 (interacts with) BAY08128_2	52.05
1109	17	49.333	1	interacts with	WP_088242795_2 (interacts with) WP_069073064_4	50.68
1110	23	53.425	1	interacts with	WP_088242795_2 (interacts with) WP_167725682_2	53.42
1111	14	44.0	1	interacts with	WP_088242795_2 (interacts with) BAZ29283_1	45.21
1113	15	54.386	1	interacts with	WP_088242795_2 (interacts with) WP_015216084_4	48.44
1114	17	48.0	1	interacts with	WP_088242795_2 (interacts with) WP_069073064_5	49.32
1115	19	47.297	1	interacts with	WP_088242795_2 (interacts with) WP_038089561_2	47.94
1116	10	40.506	1	interacts with	WP_088242795_2 (interacts with) RCJ14929_1	43.84
1117	24	54.054	1	interacts with	WP_088242795_2 (interacts with) WP_096730381_2	54.79
1118	13	40.244	1	interacts with	WP_088242795_2 (interacts with) WP_015113151_4	45.21
1119	19	47.059	1	interacts with	WP_088242795_2 (interacts with) WP_073639381_1	44.44
1121	16	47.945	1	interacts with	WP_088242795_2 (interacts with) WP_086689015_2	47.95
1122	15	41.026	1	interacts with	WP_088242795_2 (interacts with) BAZ29283_3	43.84
1123	10	40.541	1	interacts with	WP_088242795_2 (interacts with) WP_073644071_4	41.1
1124	17	44.872	1	interacts with	WP_088242795_2 (interacts with) OBQ36138_1	47.95
1126	21	49.315	1	interacts with	WP_088242795_2 (interacts with) BAY08128_1	49.31
1127	20	47.297	1	interacts with	WP_088242795_2 (interacts with) WP_087539234_3	47.94
1128	20	47.297	1	interacts with	WP_088242795_2 (interacts with) WP_087539234_4	47.94
1129	15	45.205	1	interacts with	WP_088242795_2 (interacts with) WP_038089561_4	45.2
1131	14	42.105	1	interacts with	WP_088242795_2 (interacts with) WP_168357543_1	43.84
1132	17	45.57	1	interacts with	WP_088242795_2 (interacts with) TAE59458_1	49.32
1133	17	45.57	1	interacts with	WP_088242795_2 (interacts with) TAE59458_3	49.32
1134	20	50.0	1	interacts with	WP_088242795_2 (interacts with) WP_087539234_7	50.68
1135	25	58.209	1	interacts with	WP_088242795_2 (interacts with) WP_044449859_1	56.52
1137	16	43.023	1	interacts with	WP_088242795_2 (interacts with) WP_015127932_4	50.68
1138	10	40.541	1	interacts with	WP_088242795_2 (interacts with) WP_073644071_5	41.1
1139	14	41.463	1	interacts with	WP_088242795_2 (interacts with) WP_096575011_6	46.57
1140	16	50.794	1	interacts with	WP_088242795_2 (interacts with) WP_096689510_2	43.84
1142	17	46.377	1	interacts with	WP_088242795_2 (interacts with) WP_027402982_2	43.84
1143	16	49.275	1	interacts with	WP_088242795_2 (interacts with) WP_044449859_3	46.57
1145	14	71.053	1	interacts with	WP_088242795_2 (interacts with) WP_017314970_3	41.54
1146	9	40.984	1	interacts with	WP_088242795_2 (interacts with) WP_012595952_5	45.45
1147	9	45.161	1	interacts with	WP_088242795_2 (interacts with) WP_138499827_5	46.67
1148	16	46.053	1	interacts with	WP_088242795_2 (interacts with) WP_069073064_6	47.95
1149	11	53.659	1	interacts with	WP_088242795_2 (interacts with) OBQ01900_2	40.0
1151	6	43.396	1	interacts with	WP_088242795_2 (interacts with) RCJ40334_5	41.82
1152	20	60.345	1	interacts with	WP_088242795_2 (interacts with) WP_015155263_3	47.95
1153	18	50.0	1	interacts with	WP_088242795_2 (interacts with) WP_069073064_1	50.68
1155	14	71.053	1	interacts with	WP_088242795_2 (interacts with) WP_017314970_4	41.54
1156	24	54.054	1	interacts with	WP_088242795_2 (interacts with) WP_096730381_1	54.79
1157	16	43.243	1	interacts with	WP_088242795_2 (interacts with) WP_015210601_2	43.84
1158	22	48.81	1	interacts with	WP_088242795_2 (interacts with) WP_096620064_1	56.16
1159	14	71.053	1	interacts with	WP_088242795_2 (interacts with) WP_017314970_2	41.54
1160	11	41.772	1	interacts with	WP_088242795_2 (interacts with) WP_099071810_6	45.21
1161	15	42.857	1	interacts with	WP_088242795_2 (interacts with) BAZ29283_4	45.21
1162	11	41.558	1	interacts with	WP_088242795_2 (interacts with) WP_096536886_4	43.84
1163	10	41.772	1	interacts with	WP_088242795_2 (interacts with) WP_096536886_1	45.21
1164	20	50.0	1	interacts with	WP_088242795_2 (interacts with) WP_168496018_1	50.68
1165	14	71.053	1	interacts with	WP_088242795_2 (interacts with) WP_017314970_1	41.54
1167	15	42.466	1	interacts with	WP_088242795_2 (interacts with) WP_167725682_4	42.47
1170	4	40.426	1	interacts with	WP_104296401_5 (interacts with) WP_142936832_1	40.43
1172	5	42.222	1	interacts with	WP_104296401_5 (interacts with) SLE69095_1	40.43
1174	7	48.889	1	interacts with	WP_104296401_5 (interacts with) SLE69095_3	46.81
1176	4	40.426	1	interacts with	WP_104296401_5 (interacts with) WP_166841243_1	40.43
1178	4	40.426	1	interacts with	WP_104296401_5 (interacts with) WP_091465037_2	40.43
1179	6	40.741	1	interacts with	WP_104296401_5 (interacts with) WP_164312175_3	46.81
1181	10	47.727	1	interacts with	WP_104296401_5 (interacts with) WP_133616643_3	45.65
1182	="0.001"	44.444	1	interacts with	WP_104296401_5 (interacts with) AGP61345_4	42.55
1184	="0.003"	44.186	1	interacts with	WP_104296401_5 (interacts with) AGP61345_5	40.43
1186	="0.36"	40.426	1	interacts with	WP_104296401_5 (interacts with) AOX46105_2	40.43
1188	4	40.426	1	interacts with	WP_104296401_5 (interacts with) WP_062071413_1	40.43
1189	7	45.455	1	interacts with	WP_104296401_5 (interacts with) WP_054237388_3	42.55
1191	4	40.426	1	interacts with	WP_104296401_5 (interacts with) AFR27446_2	40.43
1193	24	58.667	1	interacts with	WP_073644071_1 (interacts with) WP_162399505_1	57.9
1194	28	61.842	1	interacts with	WP_073644071_1 (interacts with) WP_096559014_1	61.84
1195	10	41.333	1	interacts with	WP_073644071_1 (interacts with) WP_066383651_5	40.79
1196	7	42.188	1	interacts with	WP_073644071_1 (interacts with) WP_015216084_5	42.19
1197	8	40.0	1	interacts with	WP_073644071_1 (interacts with) WP_103136595_2	44.74
1198	26	61.538	1	interacts with	WP_073644071_1 (interacts with) TVP62740_2	63.16
1199	10	44.595	1	interacts with	WP_073644071_1 (interacts with) WP_069073064_4	43.42
1200	45	89.474	1	interacts with	WP_073644071_1 (interacts with) WP_096536886_5	89.47
1201	28	63.158	1	interacts with	WP_073644071_1 (interacts with) WP_015212417_1	63.16
1202	26	62.025	1	interacts with	WP_073644071_1 (interacts with) WP_006195640_4	64.47
1203	40	84.932	1	interacts with	WP_073644071_1 (interacts with) WP_099071810_2	81.58
1204	21	57.895	1	interacts with	WP_073644071_1 (interacts with) WP_015113151_1	57.89
1205	30	63.636	1	interacts with	WP_073644071_1 (interacts with) WP_096559014_5	64.47
1206	23	56.0	1	interacts with	WP_073644071_1 (interacts with) WP_009343975_2	55.26
1207	12	42.857	1	interacts with	WP_073644071_1 (interacts with) BAZ29283_1	43.42
1208	23	58.025	1	interacts with	WP_073644071_1 (interacts with) WP_089091039_1	61.84
1209	10	41.892	1	interacts with	WP_073644071_1 (interacts with) WP_038089561_2	40.79
1210	10	42.254	1	interacts with	WP_073644071_1 (interacts with) WP_073639381_1	41.67
1211	20	49.412	1	interacts with	WP_073644071_1 (interacts with) WP_015113151_4	55.26
1212	24	56.962	1	interacts with	WP_073644071_1 (interacts with) WP_057178590_1	59.21
1213	20	51.22	1	interacts with	WP_073644071_1 (interacts with) WP_096575011_4	55.26
1214	10	40.506	1	interacts with	WP_073644071_1 (interacts with) WP_088242795_2	43.84
1215	27	60.241	1	interacts with	WP_073644071_1 (interacts with) CEJ45116_2	65.79
1216	20	56.41	1	interacts with	WP_073644071_1 (interacts with) WP_062295185_1	57.89
1217	10	42.105	1	interacts with	WP_073644071_1 (interacts with) WP_087539234_4	42.1
1218	16	42.683	1	interacts with	WP_073644071_1 (interacts with) CEJ45116_5	46.05
1219	26	59.211	1	interacts with	WP_073644071_1 (interacts with) WP_015212417_3	59.21
1220	12	46.667	1	interacts with	WP_073644071_1 (interacts with) TAE59458_1	46.05
1221	47	92.105	1	interacts with	WP_073644071_1 (interacts with) WP_099071810_1	92.11
1222	22	54.43	1	interacts with	WP_073644071_1 (interacts with) WP_009343975_1	56.58
1223	9	41.892	1	interacts with	WP_073644071_1 (interacts with) WP_087539234_7	40.79
1224	28	63.514	1	interacts with	WP_073644071_1 (interacts with) WP_016950446_1	61.84
1225	30	63.636	1	interacts with	WP_073644071_1 (interacts with) WP_096559014_4	64.47
1226	28	59.74	1	interacts with	WP_073644071_1 (interacts with) WP_016950446_3	60.53
1227	25	61.111	1	interacts with	WP_073644071_1 (interacts with) WP_013190203_1	57.89
1228	19	49.412	1	interacts with	WP_073644071_1 (interacts with) WP_096575011_6	55.26
1229	15	45.679	1	interacts with	WP_073644071_1 (interacts with) OBQ18754_2	48.68
1230	28	63.158	1	interacts with	WP_073644071_1 (interacts with) WP_015212417_2	63.16
1231	10	41.25	1	interacts with	WP_073644071_1 (interacts with) WP_011321056_1	43.42
1233	13	42.5	1	interacts with	WP_073644071_1 (interacts with) WP_096664869_2	44.74
1234	28	63.158	1	interacts with	WP_073644071_1 (interacts with) WP_071189061_3	63.16
1235	23	59.459	1	interacts with	WP_073644071_1 (interacts with) RCJ30949_2	57.89
1236	26	65.753	1	interacts with	WP_073644071_1 (interacts with) WP_089091039_4	63.16
1237	13	51.351	1	interacts with	WP_073644071_1 (interacts with) WP_069073064_1	50.0
1238	27	60.241	1	interacts with	WP_073644071_1 (interacts with) CEJ45116_1	65.79
1239	20	50.602	1	interacts with	WP_073644071_1 (interacts with) WP_062295185_6	55.26
1240	11	43.421	1	interacts with	WP_073644071_1 (interacts with) BAZ29283_4	43.42
1241	26	62.025	1	interacts with	WP_073644071_1 (interacts with) TVP62740_1	64.47
1242	46	93.421	1	interacts with	WP_073644071_1 (interacts with) WP_096536886_1	93.42
1243	44	88.608	1	interacts with	WP_073644071_1 (interacts with) WP_096536886_4	92.11
1244	12	44.595	1	interacts with	WP_073644071_1 (interacts with) WP_168496018_1	43.42
1245	20	51.22	1	interacts with	WP_073644071_1 (interacts with) WP_096575011_3	55.26
1246	26	63.514	1	interacts with	WP_073644071_1 (interacts with) RCJ30949_6	61.84
1247	27	63.514	1	interacts with	WP_073644071_1 (interacts with) RCJ30949_4	61.84
1248	12	41.379	1	interacts with	WP_073644071_1 (interacts with) WP_138499068_1	47.37
1249	15	48.052	1	interacts with	WP_073644071_1 (interacts with) WP_137906310_1	48.68
1250	13	44.304	1	interacts with	WP_073644071_1 (interacts with) WP_104387267_1	46.05
1251	13	42.5	1	interacts with	WP_073644071_1 (interacts with) WP_168645325_1	44.74
1252	9	44.444	1	interacts with	WP_073644071_1 (interacts with) WP_069073064_5	43.24
1253	29	63.636	1	interacts with	WP_073644071_1 (interacts with) WP_096559014_6	64.47
1254	42	85.333	1	interacts with	WP_073644071_1 (interacts with) RCJ14929_3	85.33
1255	45	89.474	1	interacts with	WP_073644071_1 (interacts with) RCJ14929_1	89.47
1256	25	65.333	1	interacts with	WP_073644071_1 (interacts with) WP_089091039_2	64.47
1257	11	42.529	1	interacts with	WP_073644071_1 (interacts with) WP_138499068_5	48.68
1258	12	44.156	1	interacts with	WP_073644071_1 (interacts with) BAZ29283_3	44.74
1259	38	80.556	1	interacts with	WP_073644071_1 (interacts with) WP_073644071_4	77.33
1260	14	62.0	1	interacts with	WP_073644071_1 (interacts with) WP_162399505_4	40.79
1261	13	44.156	1	interacts with	WP_073644071_1 (interacts with) OBQ36138_1	44.74
1262	28	61.333	1	interacts with	WP_073644071_1 (interacts with) WP_096569967_3	61.33
1263	25	59.524	1	interacts with	WP_073644071_1 (interacts with) WP_006195640_9	65.79
1264	10	42.105	1	interacts with	WP_073644071_1 (interacts with) WP_087539234_3	42.1
1265	27	62.338	1	interacts with	WP_073644071_1 (interacts with) WP_096569967_5	63.16
1266	26	62.025	1	interacts with	WP_073644071_1 (interacts with) WP_006195640_5	64.47
1267	14	59.259	1	interacts with	WP_073644071_1 (interacts with) TVP62740_6	59.26
1268	22	57.333	1	interacts with	WP_073644071_1 (interacts with) WP_006195640_8	56.58
1269	28	60.526	1	interacts with	WP_073644071_1 (interacts with) WP_096569967_4	60.53
1270	9	43.836	1	interacts with	WP_073644071_1 (interacts with) WP_044449859_1	46.38
1271	7	47.727	1	interacts with	WP_073644071_1 (interacts with) WP_012597836_7	40.38
1272	19	52.941	1	interacts with	WP_073644071_1 (interacts with) WP_062295185_4	59.21
1273	25	59.524	1	interacts with	WP_073644071_1 (interacts with) WP_006195640_2	65.79
1274	12	44.318	1	interacts with	WP_073644071_1 (interacts with) WP_015127932_4	51.32
1275	14	45.0	1	interacts with	WP_073644071_1 (interacts with) WP_168465654_1	47.37
1276	41	84.722	1	interacts with	WP_073644071_1 (interacts with) WP_073644071_5	81.33
1277	27	60.526	1	interacts with	WP_073644071_1 (interacts with) WP_071189061_2	60.53
1278	29	62.025	1	interacts with	WP_073644071_1 (interacts with) WP_096559014_8	64.47
1279	28	67.568	1	interacts with	WP_073644071_1 (interacts with) WP_006195640_7	65.79
1280	9	40.506	1	interacts with	WP_073644071_1 (interacts with) WP_066383651_2	42.1
1281	26	61.905	1	interacts with	WP_073644071_1 (interacts with) WP_089091039_3	68.42
1282	48	93.421	1	interacts with	WP_073644071_1 (interacts with) WP_073644071_2	93.42
1283	30	68.056	1	interacts with	WP_073644071_1 (interacts with) WP_073644071_8	67.12
1284	15	50.704	1	interacts with	WP_073644071_1 (interacts with) WP_015155263_3	47.37
1285	11	44.156	1	interacts with	WP_073644071_1 (interacts with) WP_096730381_1	44.74
1286	12	43.421	1	interacts with	WP_073644071_1 (interacts with) WP_015210601_2	43.42
1287	21	55.844	1	interacts with	WP_073644071_1 (interacts with) WP_096575011_2	56.58
1288	27	63.514	1	interacts with	WP_073644071_1 (interacts with) RCJ30949_5	61.84
1289	45	90.789	1	interacts with	WP_073644071_1 (interacts with) WP_099071810_6	90.79
1291	10	54.167	1	interacts with	WP_086760950_12 (interacts with) WP_012597836_5	50.0
1293	46	94.366	1	interacts with	TVP63782_5 (interacts with) AVH79456_4	94.37
1294	12	42.029	1	interacts with	TVP63782_5 (interacts with) RCJ19623_5	41.43
1296	14	45.161	1	interacts with	TVP63782_5 (interacts with) WP_171977306_3	45.16
1297	12	40.845	1	interacts with	TVP63782_5 (interacts with) WP_015216084_5	45.31
1298	8	46.809	1	interacts with	TVP63782_5 (interacts with) WP_012597836_5	42.31
1299	12	46.774	1	interacts with	TVP63782_5 (interacts with) AVH79535_6	40.84
1300	11	43.421	1	interacts with	TVP63782_5 (interacts with) WP_015216084_10	47.83
1301	8	46.809	1	interacts with	TVP63782_5 (interacts with) WP_012597836_4	42.31
1302	11	61.538	1	interacts with	TVP63782_5 (interacts with) WP_124970176_14	46.15
1303	13	42.647	1	interacts with	TVP63782_5 (interacts with) WP_106289349_2	40.85
1305	11	40.278	1	interacts with	TVP63782_5 (interacts with) WP_106300787_3	40.85
1307	7	43.636	1	interacts with	BAZ42602_5 (interacts with) RCJ30949_4	42.1
1308	12	60.526	1	interacts with	BAZ42602_5 (interacts with) WP_124155194_2	44.23
1309	12	52.0	1	interacts with	BAZ42602_5 (interacts with) WP_011610106_2	45.61
1310	13	52.174	1	interacts with	BAZ42602_5 (interacts with) WP_138498533_4	42.11
1311	17	76.923	1	interacts with	BAZ42602_5 (interacts with) BAZ42602_1	52.63
1312	12	45.098	1	interacts with	BAZ42602_5 (interacts with) WP_167721203_3	40.35
1314	8	43.333	1	interacts with	BAZ42602_5 (interacts with) AVH79535_8	45.61
1315	10	58.537	1	interacts with	BAZ42602_5 (interacts with) WP_087542717_3	42.11
1316	13	52.941	1	interacts with	BAZ42602_5 (interacts with) WP_019495762_1	47.37
1317	7	42.0	1	interacts with	BAZ42602_5 (interacts with) WP_012597836_5	40.38
1318	7	42.0	1	interacts with	BAZ42602_5 (interacts with) WP_012597836_4	40.38
1319	12	56.818	1	interacts with	BAZ42602_5 (interacts with) WP_109013279_1	43.86
1320	11	44.231	1	interacts with	BAZ42602_5 (interacts with) RCJ19623_1	40.35
1321	10	50.0	1	interacts with	BAZ42602_5 (interacts with) WP_087592205_6	41.51
1322	17	76.923	1	interacts with	BAZ42602_5 (interacts with) WP_127086205_3	52.63
1323	8	43.636	1	interacts with	BAZ42602_5 (interacts with) WP_106300787_3	42.1
1324	10	50.0	1	interacts with	BAZ42602_5 (interacts with) WP_019501037_1	40.35
1325	19	84.615	1	interacts with	BAZ42602_5 (interacts with) WP_127086205_4	57.89
1326	9	51.111	1	interacts with	BAZ42602_5 (interacts with) WP_168643398_4	40.35
1328	16	63.83	1	interacts with	BAZ42602_5 (interacts with) WP_019496925_3	52.63
1329	10	58.537	1	interacts with	BAZ42602_5 (interacts with) WP_087542717_2	42.11
1330	9	51.064	1	interacts with	BAZ42602_5 (interacts with) WP_168465654_1	42.11
1332	10	43.396	1	interacts with	BAZ42602_5 (interacts with) WP_019501955_12	40.35
1333	9	46.939	1	interacts with	BAZ42602_5 (interacts with) WP_124970176_14	44.23
1334	10	42.593	1	interacts with	BAZ42602_5 (interacts with) WP_017748579_3	40.35
1335	9	51.064	1	interacts with	BAZ42602_5 (interacts with) OBQ18754_2	42.11
1336	12	65.789	1	interacts with	BAZ42602_5 (interacts with) WP_006197379_2	43.86
1337	13	50.0	1	interacts with	BAZ42602_5 (interacts with) WP_138499827_1	43.86
1338	13	58.14	1	interacts with	BAZ42602_5 (interacts with) WP_002735885_4	43.86
1339	11	50.0	1	interacts with	BAZ42602_5 (interacts with) WP_096689510_5	40.35
1340	12	56.41	1	interacts with	BAZ42602_5 (interacts with) WP_012595952_5	40.0
1341	15	70.455	1	interacts with	BAZ42602_5 (interacts with) WP_138499827_5	54.39
1342	16	63.636	1	interacts with	BAZ42602_5 (interacts with) TRT88208_1	49.12
1343	10	51.111	1	interacts with	BAZ42602_5 (interacts with) WP_012409787_3	40.35
1345	10	62.162	1	interacts with	BAZ42602_5 (interacts with) WP_044206131_2	40.35
1346	11	53.191	1	interacts with	BAZ42602_5 (interacts with) AVH79607_2	43.86
1347	12	53.333	1	interacts with	BAZ42602_5 (interacts with) WP_138499827_4	42.1
1348	12	47.059	1	interacts with	BAZ42602_5 (interacts with) WP_086835908_1	42.11
1349	10	40.351	1	interacts with	BAZ42602_5 (interacts with) OBQ01900_3	40.35
1350	7	43.636	1	interacts with	BAZ42602_5 (interacts with) RCJ30949_5	42.1
1352	11	50.98	1	interacts with	BAZ42602_5 (interacts with) AVH79607_5	45.61
1353	11	46.429	1	interacts with	BAZ42602_5 (interacts with) WP_096689510_6	45.61
1354	13	52.941	1	interacts with	BAZ42602_5 (interacts with) WP_127078868_1	47.37
1355	11	48.0	1	interacts with	BAZ42602_5 (interacts with) WP_096688632_1	42.11
1356	8	45.455	1	interacts with	AGP61345_5 (interacts with) WP_153461219_4	49.02
1357	="0.76"	43.478	1	interacts with	AGP61345_5 (interacts with) WP_155349848_2	40.82
1359	="0.24"	45.652	1	interacts with	AGP61345_5 (interacts with) WP_155358788_3	42.86
1360	5	44.681	1	interacts with	AGP61345_5 (interacts with) WP_125821548_1	42.86
1361	5	45.098	1	interacts with	AGP61345_5 (interacts with) WP_164312175_3	45.1
1363	="0.088"	42.308	1	interacts with	AGP61345_5 (interacts with) WP_086829041_1	43.14
1365	6	43.75	1	interacts with	AGP61345_5 (interacts with) WP_164312175_2	41.18
1367	5	44.444	1	interacts with	AGP61345_5 (interacts with) WP_059262025_2	41.67
1368	6	47.059	1	interacts with	AGP61345_5 (interacts with) AGP61345_4	51.06
1370	5	46.0	1	interacts with	AGP61345_5 (interacts with) WP_073726342_1	45.1
1372	6	66.667	0	interacts with	AGP61345_5 (interacts with) WP_054237388_4	43.14
1373	6	48.889	1	interacts with	AGP61345_5 (interacts with) WP_141936425_3	43.14
1374	7	64.706	1	interacts with	AGP61345_5 (interacts with) WP_054237388_3	43.14
1375	4	55.263	1	interacts with	AGP61345_5 (interacts with) WP_136238412_3	51.22
1376	5	44.681	1	interacts with	AGP61345_5 (interacts with) WP_051840628_1	42.86
1377	25	55.422	1	interacts with	CEJ45116_2 (interacts with) WP_096559014_1	60.53
1378	24	55.422	1	interacts with	CEJ45116_2 (interacts with) WP_096536886_5	60.53
1379	9	41.538	1	interacts with	WP_086760950_11 (interacts with) WP_099700413_2	41.54
1380	11	42.623	1	interacts with	WP_086760950_11 (interacts with) WP_096689510_6	40.63
1381	43	98.462	1	interacts with	WP_086760950_11 (interacts with) WP_096589596_10	98.46
1382	18	44.872	1	interacts with	CEJ45116_5 (interacts with) WP_096559014_1	46.05
1383	11	41.772	1	interacts with	CEJ45116_5 (interacts with) WP_104387267_1	40.24
1384	14	40.244	1	interacts with	CEJ45116_5 (interacts with) WP_096536886_5	43.42
1386	12	53.846	1	interacts with	CEJ45116_5 (interacts with) WP_086769105_2	40.58
1387	12	40.0	1	interacts with	CEJ45116_5 (interacts with) WP_057178590_1	41.03
1389	9	40.506	1	interacts with	CEJ45116_5 (interacts with) TAE59458_2	41.56
1390	13	40.244	1	interacts with	CEJ45116_5 (interacts with) WP_096575011_4	40.24
1391	10	43.75	1	interacts with	CEJ45116_5 (interacts with) WP_087539234_3	42.68
1392	25	55.952	1	interacts with	CEJ45116_5 (interacts with) CEJ45116_2	57.32
1393	10	43.75	1	interacts with	CEJ45116_5 (interacts with) WP_087539234_4	42.68
1394	9	42.5	1	interacts with	CEJ45116_5 (interacts with) TAE59458_3	43.04
1396	15	44.872	1	interacts with	CEJ45116_5 (interacts with) WP_089091039_5	45.45
1397	7	45.283	1	interacts with	CEJ45116_5 (interacts with) WP_006197379_2	42.11
1398	8	42.373	1	interacts with	CEJ45116_5 (interacts with) WP_086835908_1	42.37
1399	12	48.0	1	interacts with	CEJ45116_5 (interacts with) OBQ01900_3	40.68
1400	12	41.772	1	interacts with	CEJ45116_5 (interacts with) WP_062295185_6	40.74
1401	12	43.21	1	interacts with	CEJ45116_5 (interacts with) WP_168496018_1	42.68
1402	13	41.772	1	interacts with	CEJ45116_5 (interacts with) WP_096575011_3	40.24
1403	25	57.895	1	interacts with	WP_015212417_3 (interacts with) WP_162399505_1	57.14
1404	31	67.568	1	interacts with	WP_015212417_3 (interacts with) WP_096559014_1	65.79
1405	18	47.5	1	interacts with	WP_015212417_3 (interacts with) WP_066383651_5	48.72
1406	26	57.895	1	interacts with	WP_015212417_3 (interacts with) WP_096536886_5	57.89
1407	49	93.59	1	interacts with	WP_015212417_3 (interacts with) WP_015212417_1	93.59
1408	26	60.494	1	interacts with	WP_015212417_3 (interacts with) WP_006195640_4	62.82
1409	28	61.039	1	interacts with	WP_015212417_3 (interacts with) WP_099071810_2	61.04
1410	21	57.143	1	interacts with	WP_015212417_3 (interacts with) WP_015113151_1	56.41
1411	13	46.575	1	interacts with	WP_015212417_3 (interacts with) WP_167725682_2	43.59
1412	38	80.556	1	interacts with	WP_015212417_3 (interacts with) WP_096559014_5	74.36
1413	18	50.649	1	interacts with	WP_015212417_3 (interacts with) BAZ29283_1	50.65
1414	14	47.297	1	interacts with	WP_015212417_3 (interacts with) WP_096730381_2	44.87
1415	11	40.541	1	interacts with	WP_015212417_3 (interacts with) WP_073639381_1	41.67
1416	19	52.326	1	interacts with	WP_015212417_3 (interacts with) WP_015113151_4	57.69
1417	11	41.463	1	interacts with	WP_015212417_3 (interacts with) WP_026100063_2	43.59
1418	14	45.783	1	interacts with	WP_015212417_3 (interacts with) WP_138499068_4	48.72
1419	23	51.807	1	interacts with	WP_015212417_3 (interacts with) CEJ45116_2	55.13
1420	20	53.165	1	interacts with	WP_015212417_3 (interacts with) WP_062295185_1	53.85
1421	12	42.667	1	interacts with	WP_015212417_3 (interacts with) WP_087539234_4	41.03
1422	26	56.579	1	interacts with	WP_015212417_3 (interacts with) WP_099071810_1	56.58
1423	35	76.923	1	interacts with	WP_015212417_3 (interacts with) WP_009343975_1	76.92
1424	14	47.436	1	interacts with	WP_015212417_3 (interacts with) TAE59458_3	47.44
1425	41	79.762	1	interacts with	WP_015212417_3 (interacts with) WP_016950446_1	85.9
1426	38	80.556	1	interacts with	WP_015212417_3 (interacts with) WP_096559014_4	74.36
1427	42	85.714	1	interacts with	WP_015212417_3 (interacts with) WP_013190203_1	85.71
1428	21	53.488	1	interacts with	WP_015212417_3 (interacts with) WP_096575011_6	58.97
1429	15	45.783	1	interacts with	WP_015212417_3 (interacts with) OBQ18754_2	48.72
1430	47	91.026	1	interacts with	WP_015212417_3 (interacts with) WP_015212417_2	91.03
1431	19	53.165	1	interacts with	WP_015212417_3 (interacts with) WP_011321056_1	53.85
1432	11	44.595	1	interacts with	WP_015212417_3 (interacts with) WP_069073064_6	44.59
1433	30	69.333	1	interacts with	WP_015212417_3 (interacts with) RCJ30949_2	66.67
1434	45	89.474	1	interacts with	WP_015212417_3 (interacts with) WP_071189061_3	89.47
1435	13	50.0	1	interacts with	WP_015212417_3 (interacts with) WP_086769105_3	40.58
1436	13	48.0	1	interacts with	WP_015212417_3 (interacts with) WP_069073064_1	46.15
1437	23	51.807	1	interacts with	WP_015212417_3 (interacts with) CEJ45116_1	55.13
1439	13	43.373	1	interacts with	WP_015212417_3 (interacts with) WP_012409362_6	46.15
1440	26	59.211	1	interacts with	WP_015212417_3 (interacts with) WP_096536886_1	59.21
1441	28	66.216	1	interacts with	WP_015212417_3 (interacts with) TVP62740_1	62.82
1442	19	55.263	1	interacts with	WP_015212417_3 (interacts with) BAZ29283_4	54.55
1443	12	60.465	1	interacts with	WP_015212417_3 (interacts with) WP_017314970_1	40.0
1444	24	58.025	1	interacts with	WP_015212417_3 (interacts with) WP_096575011_3	60.26
1445	19	52.941	1	interacts with	WP_015212417_3 (interacts with) WP_168496018_1	57.69
1446	33	72.0	1	interacts with	WP_015212417_3 (interacts with) RCJ30949_4	71.05
1447	11	41.558	1	interacts with	WP_015212417_3 (interacts with) WP_087539234_1	41.03
1448	14	46.988	1	interacts with	WP_015212417_3 (interacts with) WP_138499068_1	50.0
1450	9	40.0	1	interacts with	WP_015212417_3 (interacts with) WP_026100063_3	43.59
1451	13	46.25	1	interacts with	WP_015212417_3 (interacts with) WP_168645325_1	47.44
1452	13	45.0	1	interacts with	WP_015212417_3 (interacts with) WP_096681247_5	46.15
1453	12	45.333	1	interacts with	WP_015212417_3 (interacts with) WP_069073064_5	45.95
1454	30	65.789	1	interacts with	WP_015212417_3 (interacts with) RCJ14929_3	66.67
1455	26	65.333	1	interacts with	WP_015212417_3 (interacts with) WP_089091039_2	62.82
1456	16	50.667	1	interacts with	WP_015212417_3 (interacts with) WP_011321056_5	48.72
1457	14	45.679	1	interacts with	WP_015212417_3 (interacts with) WP_138499068_5	47.44
1458	17	51.948	1	interacts with	WP_015212417_3 (interacts with) BAZ29283_3	51.28
1459	13	46.154	1	interacts with	WP_015212417_3 (interacts with) OBQ36138_1	46.15
1460	39	81.579	1	interacts with	WP_015212417_3 (interacts with) WP_096569967_3	82.67
1461	40	84.615	1	interacts with	WP_015212417_3 (interacts with) WP_096569967_5	85.71
1462	14	59.184	1	interacts with	WP_015212417_3 (interacts with) TVP62740_6	53.7
1463	14	43.373	1	interacts with	WP_015212417_3 (interacts with) WP_096681247_2	46.15
1465	13	40.698	1	interacts with	WP_015212417_3 (interacts with) WP_012409362_8	44.87
1466	40	82.895	1	interacts with	WP_015212417_3 (interacts with) WP_096569967_4	82.89
1467	11	45.946	1	interacts with	WP_015212417_3 (interacts with) WP_044449859_1	49.28
1468	25	55.814	1	interacts with	WP_015212417_3 (interacts with) WP_006195640_2	61.54
1469	15	44.186	1	interacts with	WP_015212417_3 (interacts with) WP_168465654_1	48.72
1470	27	63.889	1	interacts with	WP_015212417_3 (interacts with) WP_073644071_5	61.33
1471	46	90.789	1	interacts with	WP_015212417_3 (interacts with) WP_071189061_2	90.79
1472	32	68.056	1	interacts with	WP_015212417_3 (interacts with) WP_096559014_8	62.82
1473	12	44.0	1	interacts with	WP_015212417_3 (interacts with) WP_015197629_1	42.31
1475	13	42.169	1	interacts with	WP_015212417_3 (interacts with) WP_012409362_5	44.87
1476	17	56.944	1	interacts with	WP_015212417_3 (interacts with) WP_027402982_2	52.56
1477	28	66.216	1	interacts with	WP_015212417_3 (interacts with) WP_006195640_7	62.82
1478	17	48.81	1	interacts with	WP_015212417_3 (interacts with) WP_066383651_2	52.56
1479	28	61.628	1	interacts with	WP_015212417_3 (interacts with) WP_089091039_3	67.95
1480	13	51.724	1	interacts with	WP_015212417_3 (interacts with) WP_017314970_2	46.15
1481	18	53.846	1	interacts with	WP_015212417_3 (interacts with) WP_096575011_2	53.85
1482	33	72.0	1	interacts with	WP_015212417_3 (interacts with) RCJ30949_5	71.05
1483	26	57.895	1	interacts with	WP_015212417_3 (interacts with) WP_099071810_6	57.89
1484	16	43.75	1	interacts with	WP_015212417_3 (interacts with) WP_066383651_4	44.87
1486	15	43.662	1	interacts with	WP_015210601_6 (interacts with) WP_015113151_6	43.66
1488	19	45.714	1	interacts with	WP_015210601_6 (interacts with) WP_096559014_7	45.07
1490	14	43.478	1	interacts with	WP_015210601_6 (interacts with) WP_138499068_8	42.86
1492	21	50.704	1	interacts with	WP_015210601_6 (interacts with) RCJ30949_9	50.7
1493	20	53.731	1	interacts with	WP_015210601_6 (interacts with) WP_096664869_5	52.17
1495	15	44.928	1	interacts with	WP_015210601_6 (interacts with) WP_012409362_9	43.66
1496	13	44.156	1	interacts with	WP_015210601_6 (interacts with) OBQ18754_2	47.89
1497	17	47.761	1	interacts with	WP_015210601_6 (interacts with) WP_015078657_10	46.38
1498	11	40.278	1	interacts with	WP_015210601_6 (interacts with) WP_069073064_6	40.85
1499	20	52.113	1	interacts with	WP_015210601_6 (interacts with) WP_162399505_5	52.11
1500	15	41.558	1	interacts with	WP_015210601_6 (interacts with) WP_069073064_1	45.07
1502	13	41.333	1	interacts with	WP_015210601_6 (interacts with) CEJ45116_6	43.66
1503	11	40.789	1	interacts with	WP_015210601_6 (interacts with) BAZ29283_3	43.66
1504	18	49.254	1	interacts with	WP_015210601_6 (interacts with) WP_148763415_5	47.83
1505	11	40.789	1	interacts with	WP_015210601_6 (interacts with) WP_015210601_2	43.66
1507	15	40.541	1	interacts with	WP_015210601_6 (interacts with) TVP62740_4	42.25
1508	12	43.836	1	interacts with	WP_015210601_6 (interacts with) WP_038089561_4	45.07
1510	14	70.27	1	interacts with	TAG67909_1 (interacts with) WP_099068319_4	42.62
1511	12	43.333	1	interacts with	TAG67909_1 (interacts with) WP_035150190_4	42.62
1513	7	43.548	1	interacts with	TAG67909_1 (interacts with) AVH79535_1	44.26
1514	13	47.273	1	interacts with	TAG67909_1 (interacts with) WP_138498533_4	44.07
1515	14	65.854	1	interacts with	TAG67909_1 (interacts with) BAZ42602_1	44.26
1517	14	57.778	1	interacts with	TAG67909_1 (interacts with) WP_171977306_1	42.62
1518	16	54.545	1	interacts with	TAG67909_1 (interacts with) WP_099068319_2	49.18
1519	13	54.348	1	interacts with	TAG67909_1 (interacts with) RCJ40850_1	40.98
1521	10	42.623	1	interacts with	TAG67909_1 (interacts with) RCJ19623_2	42.62
1523	11	48.077	1	interacts with	TAG67909_1 (interacts with) WP_096688632_7	40.98
1525	12	46.296	1	interacts with	TAG67909_1 (interacts with) WP_099700413_1	40.98
1526	13	54.348	1	interacts with	TAG67909_1 (interacts with) BBD63560_4	40.98
1527	13	54.348	1	interacts with	TAG67909_1 (interacts with) WP_053455886_1	40.98
1528	14	48.148	1	interacts with	TAG67909_1 (interacts with) WP_068385845_2	42.62
1530	15	58.491	1	interacts with	TAG67909_1 (interacts with) WP_163927072_2	50.82
1531	15	67.568	1	interacts with	TAG67909_1 (interacts with) WP_017318973_3	40.98
1532	12	46.296	1	interacts with	TAG67909_1 (interacts with) WP_015207767_1	40.98
1533	13	47.368	1	interacts with	TAG67909_1 (interacts with) WP_019495762_1	44.26
1534	8	42.0	1	interacts with	TAG67909_1 (interacts with) WP_012597836_5	40.38
1535	11	42.188	1	interacts with	TAG67909_1 (interacts with) AVH79535_6	44.26
1536	8	42.0	1	interacts with	TAG67909_1 (interacts with) WP_012597836_4	40.38
1537	11	49.02	1	interacts with	TAG67909_1 (interacts with) WP_096589596_10	40.98
1538	14	58.14	1	interacts with	TAG67909_1 (interacts with) WP_109013279_1	40.98
1539	13	54.348	1	interacts with	TAG67909_1 (interacts with) BBD63560_3	40.98
1540	15	70.27	1	interacts with	TAG67909_1 (interacts with) WP_096537472_3	45.61
1542	14	43.103	1	interacts with	TAG67909_1 (interacts with) WP_138498533_3	43.1
1543	13	66.667	1	interacts with	TAG67909_1 (interacts with) BAZ42602_5	45.61
1544	16	57.447	1	interacts with	TAG67909_1 (interacts with) WP_087592205_6	50.94
1545	11	49.02	1	interacts with	TAG67909_1 (interacts with) WP_086760950_11	40.98
1546	14	66.667	1	interacts with	TAG67909_1 (interacts with) WP_127086205_3	42.62
1547	12	46.296	1	interacts with	TAG67909_1 (interacts with) WP_015207763_1	40.98
1548	13	64.103	1	interacts with	TAG67909_1 (interacts with) WP_127086205_4	40.98
1549	12	41.176	1	interacts with	TAG67909_1 (interacts with) WP_168643398_4	45.9
1551	13	60.526	1	interacts with	TAG67909_1 (interacts with) WP_096688632_5	40.35
1553	13	52.0	1	interacts with	TAG67909_1 (interacts with) WP_106371152_5	47.27
1555	23	61.017	1	interacts with	TAG67909_1 (interacts with) WP_138499827_3	59.02
1556	10	44.0	1	interacts with	TAG67909_1 (interacts with) WP_012597836_7	42.31
1557	13	41.176	1	interacts with	TAG67909_1 (interacts with) WP_099700413_4	45.9
1559	16	73.171	1	interacts with	TAG67909_1 (interacts with) WP_019496925_1	49.18
1560	11	57.143	1	interacts with	TAG67909_1 (interacts with) WP_124970176_14	46.15
1562	15	52.83	1	interacts with	TAG67909_1 (interacts with) WP_124970176_9	50.0
1563	11	40.984	1	interacts with	TAG67909_1 (interacts with) WP_106240815_2	40.98
1564	15	50.0	1	interacts with	TAG67909_1 (interacts with) WP_006197379_2	49.12
1565	13	64.865	1	interacts with	TAG67909_1 (interacts with) WP_096537472_5	43.64
1566	16	57.692	1	interacts with	TAG67909_1 (interacts with) WP_138499827_1	49.18
1567	13	50.0	1	interacts with	TAG67909_1 (interacts with) WP_106300787_1	42.62
1568	12	52.083	1	interacts with	TAG67909_1 (interacts with) WP_002735885_4	40.98
1569	15	49.123	1	interacts with	TAG67909_1 (interacts with) WP_096689510_5	45.9
1570	14	42.857	1	interacts with	TAG67909_1 (interacts with) WP_012595952_5	43.64
1571	19	56.14	1	interacts with	TAG67909_1 (interacts with) WP_138499827_5	53.33
1572	13	45.312	1	interacts with	TAG67909_1 (interacts with) WP_099700413_2	47.54
1573	16	59.574	1	interacts with	TAG67909_1 (interacts with) OBQ01900_2	50.91
1574	11	55.556	1	interacts with	TAG67909_1 (interacts with) WP_012409787_3	40.98
1575	11	42.373	1	interacts with	TAG67909_1 (interacts with) WP_086769105_3	40.98
1577	10	45.902	1	interacts with	TAG67909_1 (interacts with) WP_106289349_3	45.9
1578	10	46.429	1	interacts with	TAG67909_1 (interacts with) WP_071107270_2	42.62
1579	14	69.231	1	interacts with	TAG67909_1 (interacts with) WP_138499827_4	45.0
1581	13	50.0	1	interacts with	TAG67909_1 (interacts with) WP_035150190_3	40.98
1582	15	50.877	1	interacts with	TAG67909_1 (interacts with) WP_096689510_6	47.54
1583	15	47.273	1	interacts with	TAG67909_1 (interacts with) WP_068385845_3	42.62
1584	14	47.368	1	interacts with	TAG67909_1 (interacts with) WP_127078868_1	44.26
1585	14	70.27	1	interacts with	TAG67909_1 (interacts with) WP_099068319_6	47.27
1587	14	53.488	1	interacts with	TAG67909_1 (interacts with) WP_087592205_11	45.1
1589	19	60.656	1	interacts with	TAG67909_1 (interacts with) WP_138499827_2	60.66
1590	14	50.0	1	interacts with	TAG67909_1 (interacts with) BBD63560_1	40.98
1592	10	57.692	1	interacts with	WP_066371470_4 (interacts with) WP_062346719_1	63.83
1593	6	50.0	1	interacts with	WP_066371470_4 (interacts with) WP_155349848_2	46.81
1595	8	54.717	1	interacts with	WP_066371470_4 (interacts with) WP_062339008_1	61.7
1597	8	51.786	1	interacts with	WP_066371470_4 (interacts with) WP_062339008_3	61.7
1598	9	58.14	1	interacts with	WP_066371470_4 (interacts with) WP_155349848_3	53.19
1600	10	59.615	1	interacts with	WP_066371470_4 (interacts with) WP_066371470_3	65.96
1601	8	55.769	1	interacts with	WP_066371470_4 (interacts with) WP_066371470_6	61.7
1602	4	40.385	1	interacts with	WP_066371470_4 (interacts with) WP_155358788_2	44.68
1603	11	62.0	1	interacts with	WP_066371470_4 (interacts with) WP_062339008_4	65.96
1604	8	53.846	1	interacts with	WP_066371470_4 (interacts with) WP_066371470_2	59.57
1605	7	54.545	1	interacts with	WP_066371470_4 (interacts with) WP_155358788_3	51.06
1607	10	64.0	1	interacts with	WP_066371470_4 (interacts with) WP_155349848_1	68.09
1608	9	95.455	0	interacts with	WP_066371470_4 (interacts with) WP_062339008_5	44.68
1609	9	51.786	1	interacts with	WP_066371470_4 (interacts with) WP_066371470_1	61.7
1611	5	45.833	1	interacts with	WP_066371470_4 (interacts with) WP_066371470_5	48.89
1613	7	50.98	1	interacts with	WP_066371470_4 (interacts with) WP_062346719_2	55.32
1614	7	67.857	1	interacts with	WP_066371470_4 (interacts with) WP_066371470_7	42.22
1615	10	64.0	1	interacts with	WP_066371470_4 (interacts with) WP_155358788_1	68.09
1616	13	47.368	1	interacts with	TAE59458_3 (interacts with) WP_096559014_1	47.37
1617	10	40.506	1	interacts with	TAE59458_3 (interacts with) WP_096536886_5	42.1
1618	11	40.964	1	interacts with	TAE59458_3 (interacts with) CEJ45116_2	43.04
1619	15	45.333	1	interacts with	TAE59458_3 (interacts with) WP_038089561_4	43.59
1621	11	64.103	0	interacts with	WP_068385845_6 (interacts with) WP_099068319_4	40.98
1622	8	44.0	1	interacts with	WP_068385845_6 (interacts with) WP_012595952_5	40.0
1623	13	53.571	1	interacts with	WP_068385845_6 (interacts with) WP_044449859_1	43.48
1624	8	43.396	1	interacts with	WP_068385845_6 (interacts with) WP_124970176_14	44.23
1625	10	64.103	0	interacts with	WP_068385845_6 (interacts with) WP_096537472_3	43.86
1626	17	42.697	1	interacts with	WP_068385845_6 (interacts with) WP_096689510_2	45.24
1628	8	42.308	1	interacts with	WP_073591536_4 (interacts with) WP_012595952_5	40.0
1629	10	44.444	1	interacts with	WP_073591536_4 (interacts with) TRT88208_1	40.68
1630	14	46.667	1	interacts with	WP_073591536_4 (interacts with) WP_015216084_5	43.75
1631	11	41.538	1	interacts with	WP_073591536_4 (interacts with) WP_015216084_10	42.19
1632	14	51.923	1	interacts with	WP_155358788_2 (interacts with) WP_062346719_1	51.92
1633	9	52.5	1	interacts with	WP_155358788_2 (interacts with) WP_066371470_3	41.18
1634	26	82.692	1	interacts with	WP_155358788_2 (interacts with) WP_155349848_3	82.69
1635	4	42.308	1	interacts with	WP_155358788_2 (interacts with) WP_155358788_3	44.9
1636	11	57.692	1	interacts with	WP_155358788_2 (interacts with) WP_062339008_5	62.5
1637	8	59.259	1	interacts with	WP_155358788_2 (interacts with) WP_062339008_2	61.54
1639	6	41.818	1	interacts with	WP_155358788_2 (interacts with) WP_017581465_1	44.23
1640	7	55.0	1	interacts with	WP_155358788_2 (interacts with) WP_066371470_7	48.89
1641	="0.002"	40.476	1	interacts with	WP_155358788_2 (interacts with) WP_136238412_3	41.46
1643	4	40.0	1	interacts with	WP_155358788_2 (interacts with) WP_062346719_3	41.67
1644	13	56.364	1	interacts with	WP_155358788_2 (interacts with) WP_155358788_1	62.0
1645	34	72.368	1	interacts with	WP_096559014_4 (interacts with) WP_096559014_1	72.37
1646	30	62.338	1	interacts with	WP_096559014_4 (interacts with) WP_096536886_5	63.16
1647	30	62.651	1	interacts with	WP_096559014_4 (interacts with) CEJ45116_2	65.0
1648	17	46.154	1	interacts with	WP_096559014_4 (interacts with) CEJ45116_5	45.0
1649	15	50.633	1	interacts with	WP_096559014_4 (interacts with) TAE59458_3	50.63
1650	29	75.0	1	interacts with	WP_053706403_2 (interacts with) WP_051708270_1	73.77
1651	39	95.082	1	interacts with	WP_053706403_2 (interacts with) ANS68054_1	95.08
1652	38	91.803	1	interacts with	WP_053706403_2 (interacts with) WP_079191916_2	91.8
1653	8	45.902	1	interacts with	WP_053706403_2 (interacts with) ALC22075_5	45.9
1654	11	42.857	1	interacts with	WP_053706403_2 (interacts with) WP_157846946_2	43.64
1655	7	45.161	1	interacts with	WP_053706403_2 (interacts with) WP_109595189_2	46.67
1656	6	53.191	1	interacts with	WP_053706403_2 (interacts with) WP_130878496_1	40.98
1657	13	52.459	1	interacts with	WP_053706403_2 (interacts with) WP_130878496_2	54.24
1658	18	54.098	1	interacts with	WP_053706403_2 (interacts with) WP_079189213_2	55.0
1659	10	52.459	1	interacts with	WP_053706403_2 (interacts with) WP_104258544_2	54.24
1660	14	68.421	1	interacts with	WP_099700413_4 (interacts with) WP_099068319_4	42.62
1661	14	60.0	1	interacts with	WP_099700413_4 (interacts with) WP_070396036_1	43.42
1662	11	41.27	1	interacts with	WP_099700413_4 (interacts with) WP_015216084_5	40.63
1663	13	51.724	1	interacts with	WP_099700413_4 (interacts with) WP_053455886_1	46.15
1664	13	51.724	1	interacts with	WP_099700413_4 (interacts with) BBD63560_4	46.15
1665	9	41.538	1	interacts with	WP_099700413_4 (interacts with) WP_096589596_10	41.54
1666	14	68.421	1	interacts with	WP_099700413_4 (interacts with) WP_096537472_3	45.61
1667	10	45.588	1	interacts with	WP_099700413_4 (interacts with) WP_070396036_3	40.79
1668	8	41.538	1	interacts with	WP_099700413_4 (interacts with) WP_086760950_11	41.54
1669	11	60.377	1	interacts with	WP_099700413_4 (interacts with) WP_096559014_4	42.11
1670	7	42.857	1	interacts with	WP_099700413_4 (interacts with) WP_124970176_14	40.38
1671	14	48.0	1	interacts with	WP_099700413_4 (interacts with) WP_017748579_3	47.37
1672	15	51.562	1	interacts with	WP_099700413_4 (interacts with) RCJ30949_2	43.42
1673	40	89.855	1	interacts with	WP_099700413_4 (interacts with) WP_099700413_2	81.58
1674	18	59.375	1	interacts with	WP_099700413_4 (interacts with) WP_017314970_2	58.46
1675	13	41.892	1	interacts with	WP_099700413_4 (interacts with) WP_106240815_3	40.79
1676	21	63.636	1	interacts with	WP_099700413_4 (interacts with) WP_068385845_3	56.0
1677	18	59.091	1	interacts with	WP_099700413_4 (interacts with) WP_096689510_6	60.94
1679	17	46.988	1	interacts with	WP_015078657_2 (interacts with) WP_162399505_1	50.65
1680	14	47.561	1	interacts with	WP_015078657_2 (interacts with) WP_096559014_1	51.32
1681	12	44.156	1	interacts with	WP_015078657_2 (interacts with) WP_066383651_5	41.98
1683	18	45.783	1	interacts with	WP_015078657_2 (interacts with) WP_012409362_4	45.78
1684	12	46.25	1	interacts with	WP_015078657_2 (interacts with) WP_103136595_2	44.58
1685	13	47.368	1	interacts with	WP_015078657_2 (interacts with) TVP62740_2	46.15
1686	12	43.421	1	interacts with	WP_015078657_2 (interacts with) WP_069073064_4	42.86
1687	14	44.444	1	interacts with	WP_015078657_2 (interacts with) WP_096536886_5	47.37
1688	14	45.349	1	interacts with	WP_015078657_2 (interacts with) WP_015212417_1	50.0
1689	11	42.5	1	interacts with	WP_015078657_2 (interacts with) WP_006195640_4	40.96
1690	17	53.247	1	interacts with	WP_015078657_2 (interacts with) WP_099071810_2	53.25
1691	12	42.857	1	interacts with	WP_015078657_2 (interacts with) WP_015113151_1	40.74
1692	15	48.148	1	interacts with	WP_015078657_2 (interacts with) WP_096559014_5	48.75
1694	11	41.975	1	interacts with	WP_015078657_2 (interacts with) WP_026100063_4	41.46
1695	17	48.148	1	interacts with	WP_015078657_2 (interacts with) WP_009343975_2	51.32
1696	10	41.975	1	interacts with	WP_015078657_2 (interacts with) WP_089091039_1	41.46
1697	28	59.74	1	interacts with	WP_015078657_2 (interacts with) BAZ29283_1	59.74
1698	16	44.156	1	interacts with	WP_015078657_2 (interacts with) WP_096730381_2	40.96
1699	11	44.0	1	interacts with	WP_015078657_2 (interacts with) WP_162399505_5	45.83
1700	11	44.286	1	interacts with	WP_015078657_2 (interacts with) WP_073639381_1	43.06
1701	13	44.186	1	interacts with	WP_015078657_2 (interacts with) WP_015113151_4	45.78
1702	20	49.383	1	interacts with	WP_015078657_2 (interacts with) WP_057178590_1	51.28
1703	15	45.783	1	interacts with	WP_015078657_2 (interacts with) WP_096575011_4	45.78
1704	21	50.588	1	interacts with	WP_015078657_2 (interacts with) WP_138499068_4	51.81
1705	15	45.679	1	interacts with	WP_015078657_2 (interacts with) WP_073644071_1	48.68
1706	9	51.064	1	interacts with	WP_015078657_2 (interacts with) BAZ42602_5	42.11
1707	12	42.529	1	interacts with	WP_015078657_2 (interacts with) CEJ45116_2	44.58
1708	12	46.753	1	interacts with	WP_015078657_2 (interacts with) WP_062295185_1	43.37
1709	13	40.244	1	interacts with	WP_015078657_2 (interacts with) WP_087539234_4	40.24
1710	13	44.156	1	interacts with	WP_015078657_2 (interacts with) WP_015210601_6	47.89
1711	15	45.783	1	interacts with	WP_015078657_2 (interacts with) WP_015212417_3	48.72
1712	12	40.741	1	interacts with	WP_015078657_2 (interacts with) WP_038089561_4	42.31
1713	17	46.753	1	interacts with	WP_015078657_2 (interacts with) TAE59458_1	45.57
1714	16	45.679	1	interacts with	WP_015078657_2 (interacts with) WP_099071810_1	48.68
1715	22	50.617	1	interacts with	WP_015078657_2 (interacts with) WP_009343975_1	52.56
1716	16	44.156	1	interacts with	WP_015078657_2 (interacts with) TAE59458_3	43.04
1717	11	42.857	1	interacts with	WP_015078657_2 (interacts with) WP_087539234_7	40.24
1718	13	43.21	1	interacts with	WP_015078657_2 (interacts with) WP_016950446_1	42.17
1719	15	48.148	1	interacts with	WP_015078657_2 (interacts with) WP_096559014_4	48.75
1720	17	49.398	1	interacts with	WP_015078657_2 (interacts with) WP_016950446_3	51.9
1721	15	47.368	1	interacts with	WP_015078657_2 (interacts with) WP_013190203_1	46.75
1722	13	43.529	1	interacts with	WP_015078657_2 (interacts with) WP_096575011_6	44.58
1723	56	100.0	1	interacts with	WP_015078657_2 (interacts with) OBQ18754_2	100.0
1724	14	43.75	1	interacts with	WP_015078657_2 (interacts with) WP_015212417_2	44.87
1725	15	44.444	1	interacts with	WP_015078657_2 (interacts with) WP_011321056_1	45.0
1726	11	44.737	1	interacts with	WP_015078657_2 (interacts with) WP_069073064_6	45.95
1727	11	43.59	1	interacts with	WP_015078657_2 (interacts with) RCJ30949_2	43.59
1728	41	89.024	1	interacts with	WP_015078657_2 (interacts with) WP_096664869_2	87.95
1729	15	47.619	1	interacts with	WP_015078657_2 (interacts with) WP_071189061_3	52.63
1730	14	48.684	1	interacts with	WP_015078657_2 (interacts with) WP_089091039_4	48.05
1731	11	40.26	1	interacts with	WP_015078657_2 (interacts with) WP_168496018_3	43.66
1732	19	51.899	1	interacts with	WP_015078657_2 (interacts with) WP_069073064_1	49.4
1733	12	42.529	1	interacts with	WP_015078657_2 (interacts with) CEJ45116_1	44.58
1734	19	46.988	1	interacts with	WP_015078657_2 (interacts with) WP_012409362_6	46.99
1735	17	45.455	1	interacts with	WP_015078657_2 (interacts with) WP_062295185_6	49.38
1737	12	41.463	1	interacts with	WP_015078657_2 (interacts with) WP_015127932_1	40.96
1738	13	47.368	1	interacts with	WP_015078657_2 (interacts with) TVP62740_1	45.57
1739	28	64.103	1	interacts with	WP_015078657_2 (interacts with) BAZ29283_4	64.94
1740	15	46.914	1	interacts with	WP_015078657_2 (interacts with) WP_096536886_1	50.0
1741	15	48.684	1	interacts with	WP_015078657_2 (interacts with) WP_096536886_4	46.84
1742	20	50.0	1	interacts with	WP_015078657_2 (interacts with) WP_168496018_1	48.19
1743	15	46.429	1	interacts with	WP_015078657_2 (interacts with) WP_096575011_3	46.99
1744	13	46.429	1	interacts with	WP_015078657_2 (interacts with) RCJ30949_6	51.32
1745	10	60.526	0	interacts with	WP_015078657_2 (interacts with) WP_099068319_6	41.82
1746	13	45.238	1	interacts with	WP_015078657_2 (interacts with) RCJ30949_4	50.0
1747	23	51.765	1	interacts with	WP_015078657_2 (interacts with) WP_138499068_1	53.01
1748	41	79.747	1	interacts with	WP_015078657_2 (interacts with) WP_137906310_1	75.9
1749	20	46.988	1	interacts with	WP_015078657_2 (interacts with) WP_104387267_1	47.56
1751	20	46.591	1	interacts with	WP_015078657_2 (interacts with) WP_012409362_2	49.4
1752	40	85.542	1	interacts with	WP_015078657_2 (interacts with) WP_168645325_1	85.54
1754	19	48.864	1	interacts with	WP_015078657_2 (interacts with) WP_114082527_2	51.81
1755	16	42.683	1	interacts with	WP_015078657_2 (interacts with) WP_096681247_5	42.17
1757	15	47.368	1	interacts with	WP_015078657_2 (interacts with) WP_011321056_2	46.15
1758	13	44.872	1	interacts with	WP_015078657_2 (interacts with) WP_069073064_5	47.3
1759	16	49.383	1	interacts with	WP_015078657_2 (interacts with) WP_096559014_6	50.0
1760	13	45.455	1	interacts with	WP_015078657_2 (interacts with) RCJ14929_3	46.67
1761	15	45.679	1	interacts with	WP_015078657_2 (interacts with) RCJ14929_1	48.68
1763	11	44.828	1	interacts with	WP_015078657_2 (interacts with) WP_015127932_2	46.99
1764	12	48.684	1	interacts with	WP_015078657_2 (interacts with) WP_089091039_2	46.84
1765	21	51.765	1	interacts with	WP_015078657_2 (interacts with) WP_138499068_5	53.01
1766	15	47.368	1	interacts with	WP_015078657_2 (interacts with) WP_011321056_5	46.15
1768	21	48.837	1	interacts with	WP_015078657_2 (interacts with) WP_012409362_7	50.6
1769	30	62.338	1	interacts with	WP_015078657_2 (interacts with) BAZ29283_3	60.76
1770	14	45.0	1	interacts with	WP_015078657_2 (interacts with) WP_066383651_6	45.57
1771	14	50.649	1	interacts with	WP_015078657_2 (interacts with) WP_073644071_4	52.0
1772	39	76.623	1	interacts with	WP_015078657_2 (interacts with) OBQ36138_1	71.08
1773	14	49.351	1	interacts with	WP_015078657_2 (interacts with) WP_096569967_3	50.67
1774	15	49.412	1	interacts with	WP_015078657_2 (interacts with) WP_006195640_9	50.6
1775	13	40.244	1	interacts with	WP_015078657_2 (interacts with) WP_087539234_3	40.24
1776	15	45.0	1	interacts with	WP_015078657_2 (interacts with) WP_096569967_5	46.75
1777	11	42.5	1	interacts with	WP_015078657_2 (interacts with) WP_006195640_5	40.96
1778	27	69.231	1	interacts with	WP_015078657_2 (interacts with) WP_168357543_1	65.06
1779	13	45.455	1	interacts with	WP_015078657_2 (interacts with) WP_006195640_8	49.38
1780	15	46.341	1	interacts with	WP_015078657_2 (interacts with) WP_096569967_4	50.0
1781	21	48.837	1	interacts with	WP_015078657_2 (interacts with) WP_012409362_8	50.6
1782	13	44.737	1	interacts with	WP_015078657_2 (interacts with) WP_044449859_1	49.28
1783	13	46.914	1	interacts with	WP_015078657_2 (interacts with) WP_062295185_4	45.78
1784	10	42.857	1	interacts with	WP_015078657_2 (interacts with) WP_006195640_2	43.37
1785	18	48.75	1	interacts with	WP_015078657_2 (interacts with) WP_015127932_4	46.99
1786	54	96.512	1	interacts with	WP_015078657_2 (interacts with) WP_168465654_1	100.0
1787	10	56.522	1	interacts with	WP_015078657_2 (interacts with) WP_019496925_1	40.0
1788	15	50.649	1	interacts with	WP_015078657_2 (interacts with) WP_073644071_5	52.0
1789	20	56.627	1	interacts with	WP_015078657_2 (interacts with) WP_096559014_8	59.49
1790	13	49.398	1	interacts with	WP_015078657_2 (interacts with) WP_071189061_2	53.95
1792	16	41.463	1	interacts with	WP_015078657_2 (interacts with) WP_096681247_6	40.96
1793	18	45.783	1	interacts with	WP_015078657_2 (interacts with) WP_012409362_5	45.78
1794	17	49.315	1	interacts with	WP_015078657_2 (interacts with) WP_027402982_2	43.37
1795	14	47.368	1	interacts with	WP_015078657_2 (interacts with) WP_006195640_7	46.15
1796	16	50.0	1	interacts with	WP_015078657_2 (interacts with) WP_066383651_2	48.78
1797	15	48.235	1	interacts with	WP_015078657_2 (interacts with) WP_089091039_3	49.4
1798	16	46.914	1	interacts with	WP_015078657_2 (interacts with) WP_073644071_2	50.0
1799	10	42.857	1	interacts with	WP_015078657_2 (interacts with) WP_073644071_8	45.21
1801	21	48.837	1	interacts with	WP_015078657_2 (interacts with) WP_114082527_5	50.6
1802	16	45.455	1	interacts with	WP_015078657_2 (interacts with) WP_096730381_1	42.17
1803	30	67.532	1	interacts with	WP_015078657_2 (interacts with) WP_015210601_2	62.65
1804	12	40.698	1	interacts with	WP_015078657_2 (interacts with) WP_026100063_6	42.17
1805	13	45.238	1	interacts with	WP_015078657_2 (interacts with) RCJ30949_5	50.0
1806	15	45.679	1	interacts with	WP_015078657_2 (interacts with) WP_099071810_6	48.68
1807	11	41.25	1	interacts with	WP_015078657_2 (interacts with) WP_066383651_4	41.25
1808	14	42.029	1	interacts with	WP_057178590_8 (interacts with) WP_015078657_10	42.03
1809	14	44.776	1	interacts with	WP_057178590_8 (interacts with) WP_162399505_5	43.48
1810	13	43.284	1	interacts with	WP_057178590_8 (interacts with) RCJ30949_9	42.03
1811	15	42.029	1	interacts with	WP_057178590_8 (interacts with) WP_148763415_5	42.03
1813	14	43.284	1	interacts with	WP_057178590_8 (interacts with) WP_015127932_7	42.03
1814	19	52.239	1	interacts with	WP_057178590_8 (interacts with) WP_015210601_6	50.72
1816	15	44.928	1	interacts with	WP_057178590_8 (interacts with) TAE59458_6	44.93
1817	10	40.0	1	interacts with	WP_057178590_8 (interacts with) WP_038089561_4	40.58
1818	15	44.928	1	interacts with	WP_057178590_8 (interacts with) OBQ18754_3	44.93
1819	10	41.096	1	interacts with	WP_057178590_8 (interacts with) WP_167725682_4	43.48
1822	44	87.324	1	interacts with	WP_051840194_2 (interacts with) WP_018960901_1	87.32
1823	6	45.161	1	interacts with	WP_051840194_2 (interacts with) WP_153461219_4	43.08
1825	15	46.667	1	interacts with	WP_051840194_2 (interacts with) WP_009079852_1	49.3
1827	39	77.778	1	interacts with	WP_051840194_2 (interacts with) WP_141310912_1	78.87
1829	39	76.056	1	interacts with	WP_051840194_2 (interacts with) WP_058047489_1	76.06
1830	8	41.791	1	interacts with	WP_051840194_2 (interacts with) WP_071383933_2	45.16
1832	17	49.333	1	interacts with	WP_051840194_2 (interacts with) WP_051418997_1	52.11
1834	44	87.324	1	interacts with	WP_051840194_2 (interacts with) WP_097866484_1	87.32
1836	38	75.0	1	interacts with	WP_051840194_2 (interacts with) WP_093908736_1	76.06
1838	38	76.389	1	interacts with	WP_051840194_2 (interacts with) WP_159770677_1	77.46
1840	38	75.0	1	interacts with	WP_051840194_2 (interacts with) WP_126393842_1	76.06
1842	41	78.873	1	interacts with	WP_051840194_2 (interacts with) WP_120754718_1	78.87
1844	50	100.0	1	interacts with	WP_051840194_2 (interacts with) WP_051840194_1	100.0
1846	16	42.308	1	interacts with	WP_051840194_2 (interacts with) WP_106331017_2	46.48
1848	11	52.174	1	interacts with	WP_051840194_2 (interacts with) WP_143043955_1	51.06
1851	10	45.614	1	interacts with	WP_062295185_3 (interacts with) WP_127086205_5	41.27
1852	26	62.963	1	interacts with	WP_062295185_3 (interacts with) WP_162399505_1	66.23
1853	24	64.474	1	interacts with	WP_062295185_3 (interacts with) WP_096559014_1	64.47
1854	10	41.772	1	interacts with	WP_062295185_3 (interacts with) WP_066383651_5	40.74
1855	9	44.872	1	interacts with	WP_062295185_3 (interacts with) WP_103136595_2	41.18
1856	22	56.579	1	interacts with	WP_062295185_3 (interacts with) TVP62740_2	55.13
1857	11	43.529	1	interacts with	WP_062295185_3 (interacts with) WP_069073064_4	48.05
1858	19	51.25	1	interacts with	WP_062295185_3 (interacts with) WP_096536886_5	53.95
1859	21	51.22	1	interacts with	WP_062295185_3 (interacts with) WP_015212417_1	53.85
1860	20	53.086	1	interacts with	WP_062295185_3 (interacts with) WP_006195640_4	51.81
1861	19	53.947	1	interacts with	WP_062295185_3 (interacts with) WP_099071810_2	53.25
1862	35	71.765	1	interacts with	WP_062295185_3 (interacts with) WP_015113151_1	75.31
1863	24	58.442	1	interacts with	WP_062295185_3 (interacts with) WP_096559014_5	56.25
1864	11	41.25	1	interacts with	WP_062295185_3 (interacts with) WP_026100063_4	40.24
1865	21	50.0	1	interacts with	WP_062295185_3 (interacts with) WP_009343975_2	51.32
1866	15	46.25	1	interacts with	WP_062295185_3 (interacts with) BAZ29283_1	48.05
1867	23	58.025	1	interacts with	WP_062295185_3 (interacts with) WP_089091039_1	57.32
1868	15	42.857	1	interacts with	WP_062295185_3 (interacts with) WP_073639381_1	45.83
1869	31	65.909	1	interacts with	WP_062295185_3 (interacts with) WP_015113151_4	68.24
1870	21	50.0	1	interacts with	WP_062295185_3 (interacts with) WP_057178590_1	48.72
1871	54	94.118	1	interacts with	WP_062295185_3 (interacts with) WP_096575011_4	94.12
1872	19	50.0	1	interacts with	WP_062295185_3 (interacts with) WP_073644071_1	53.95
1873	21	51.19	1	interacts with	WP_062295185_3 (interacts with) CEJ45116_2	50.59
1874	37	76.471	1	interacts with	WP_062295185_3 (interacts with) WP_062295185_1	78.31
1875	12	40.698	1	interacts with	WP_062295185_3 (interacts with) WP_087539234_4	42.68
1876	23	56.25	1	interacts with	WP_062295185_3 (interacts with) WP_015212417_3	57.69
1877	15	47.561	1	interacts with	WP_062295185_3 (interacts with) TAE59458_1	49.37
1878	19	51.25	1	interacts with	WP_062295185_3 (interacts with) WP_099071810_1	53.95
1879	15	45.122	1	interacts with	WP_062295185_3 (interacts with) TAE59458_3	46.84
1880	17	47.368	1	interacts with	WP_062295185_3 (interacts with) WP_009343975_1	46.15
1881	24	55.814	1	interacts with	WP_062295185_3 (interacts with) WP_016950446_1	57.14
1882	24	58.442	1	interacts with	WP_062295185_3 (interacts with) WP_096559014_4	56.25
1883	16	46.988	1	interacts with	WP_062295185_3 (interacts with) WP_015078657_2	46.99
1884	20	51.948	1	interacts with	WP_062295185_3 (interacts with) WP_013190203_1	51.95
1885	19	53.247	1	interacts with	WP_062295185_3 (interacts with) WP_016950446_3	51.9
1886	16	46.988	1	interacts with	WP_062295185_3 (interacts with) OBQ18754_2	46.99
1887	31	68.605	1	interacts with	WP_062295185_3 (interacts with) WP_096575011_6	69.41
1888	20	50.0	1	interacts with	WP_062295185_3 (interacts with) WP_015212417_2	52.56
1889	12	43.21	1	interacts with	WP_062295185_3 (interacts with) WP_011321056_1	43.75
1890	10	40.476	1	interacts with	WP_062295185_3 (interacts with) WP_069073064_6	45.95
1891	13	44.828	1	interacts with	WP_062295185_3 (interacts with) WP_096664869_2	45.88
1892	21	55.0	1	interacts with	WP_062295185_3 (interacts with) WP_071189061_3	57.89
1893	21	54.545	1	interacts with	WP_062295185_3 (interacts with) RCJ30949_2	53.85
1894	22	63.636	1	interacts with	WP_062295185_3 (interacts with) WP_089091039_4	63.64
1895	12	40.964	1	interacts with	WP_062295185_3 (interacts with) WP_069073064_1	40.0
1896	13	51.064	1	interacts with	WP_062295185_3 (interacts with) OBQ01900_3	40.68
1897	21	51.19	1	interacts with	WP_062295185_3 (interacts with) CEJ45116_1	50.59
1898	53	97.5	1	interacts with	WP_062295185_3 (interacts with) WP_062295185_6	96.3
1899	12	44.872	1	interacts with	WP_062295185_3 (interacts with) WP_068385845_3	46.67
1900	14	45.455	1	interacts with	WP_062295185_3 (interacts with) BAZ29283_4	45.45
1901	23	57.692	1	interacts with	WP_062295185_3 (interacts with) TVP62740_1	56.96
1902	21	53.75	1	interacts with	WP_062295185_3 (interacts with) WP_096536886_1	56.58
1903	19	50.633	1	interacts with	WP_062295185_3 (interacts with) WP_096536886_4	50.63
1904	15	48.718	1	interacts with	WP_062295185_3 (interacts with) WP_168496018_1	44.71
1905	52	90.476	1	interacts with	WP_062295185_3 (interacts with) WP_096575011_3	89.41
1906	20	53.247	1	interacts with	WP_062295185_3 (interacts with) RCJ30949_6	53.95
1907	10	51.111	1	interacts with	WP_062295185_3 (interacts with) WP_099068319_6	41.82
1908	21	53.247	1	interacts with	WP_062295185_3 (interacts with) RCJ30949_4	53.95
1909	12	43.529	1	interacts with	WP_062295185_3 (interacts with) WP_087539234_1	43.53
1910	19	52.564	1	interacts with	WP_062295185_3 (interacts with) WP_137906310_1	48.24
1911	16	48.101	1	interacts with	WP_062295185_3 (interacts with) WP_104387267_1	46.34
1912	13	47.561	1	interacts with	WP_062295185_3 (interacts with) WP_168645325_1	46.99
1913	11	41.25	1	interacts with	WP_062295185_3 (interacts with) WP_011321056_2	42.31
1914	10	41.667	1	interacts with	WP_062295185_3 (interacts with) WP_069073064_5	47.3
1915	25	59.74	1	interacts with	WP_062295185_3 (interacts with) WP_096559014_6	57.5
1916	21	52.5	1	interacts with	WP_062295185_3 (interacts with) RCJ14929_3	56.0
1917	19	50.0	1	interacts with	WP_062295185_3 (interacts with) RCJ14929_1	52.63
1918	23	60.526	1	interacts with	WP_062295185_3 (interacts with) WP_089091039_2	58.23
1919	11	44.156	1	interacts with	WP_062295185_3 (interacts with) WP_011321056_5	43.59
1920	16	48.052	1	interacts with	WP_062295185_3 (interacts with) BAZ29283_3	46.84
1921	20	54.545	1	interacts with	WP_062295185_3 (interacts with) WP_073644071_4	56.0
1922	17	47.436	1	interacts with	WP_062295185_3 (interacts with) OBQ36138_1	43.53
1923	16	65.455	1	interacts with	WP_062295185_3 (interacts with) WP_162399505_4	42.35
1924	21	50.0	1	interacts with	WP_062295185_3 (interacts with) WP_096569967_3	53.33
1925	22	53.488	1	interacts with	WP_062295185_3 (interacts with) WP_006195640_9	54.12
1926	12	40.698	1	interacts with	WP_062295185_3 (interacts with) WP_087539234_3	42.68
1927	9	48.936	1	interacts with	WP_062295185_3 (interacts with) WP_087592205_6	43.4
1928	22	51.25	1	interacts with	WP_062295185_3 (interacts with) WP_096569967_5	53.25
1929	20	53.086	1	interacts with	WP_062295185_3 (interacts with) WP_006195640_5	51.81
1930	16	48.052	1	interacts with	WP_062295185_3 (interacts with) WP_168357543_1	43.53
1931	8	47.17	1	interacts with	WP_062295185_3 (interacts with) TVP62740_6	46.3
1932	14	43.75	1	interacts with	WP_062295185_3 (interacts with) WP_006195640_8	43.21
1933	22	51.25	1	interacts with	WP_062295185_3 (interacts with) WP_096569967_4	53.95
1934	13	40.789	1	interacts with	WP_062295185_3 (interacts with) WP_044449859_1	44.93
1935	31	67.442	1	interacts with	WP_062295185_3 (interacts with) WP_062295185_4	68.24
1936	21	51.163	1	interacts with	WP_062295185_3 (interacts with) WP_006195640_2	51.76
1937	16	46.154	1	interacts with	WP_062295185_3 (interacts with) WP_168465654_1	49.41
1938	21	55.844	1	interacts with	WP_062295185_3 (interacts with) WP_073644071_5	57.33
1939	21	52.5	1	interacts with	WP_062295185_3 (interacts with) WP_071189061_2	55.26
1940	26	62.338	1	interacts with	WP_062295185_3 (interacts with) WP_096559014_8	60.76
1941	12	45.946	1	interacts with	WP_062295185_3 (interacts with) WP_027402982_2	40.0
1942	22	59.211	1	interacts with	WP_062295185_3 (interacts with) WP_006195640_7	57.69
1943	10	41.772	1	interacts with	WP_062295185_3 (interacts with) WP_066383651_2	40.24
1944	24	56.977	1	interacts with	WP_062295185_3 (interacts with) WP_089091039_3	57.65
1945	16	49.351	1	interacts with	WP_062295185_3 (interacts with) WP_073644071_8	52.06
1946	21	51.25	1	interacts with	WP_062295185_3 (interacts with) WP_073644071_2	53.95
1947	15	46.154	1	interacts with	WP_062295185_3 (interacts with) WP_015210601_2	42.35
1948	35	70.588	1	interacts with	WP_062295185_3 (interacts with) WP_096575011_2	73.17
1949	21	53.247	1	interacts with	WP_062295185_3 (interacts with) RCJ30949_5	53.95
1950	19	51.852	1	interacts with	WP_062295185_3 (interacts with) WP_099071810_6	55.26
1952	5	41.509	1	interacts with	RCJ40334_3 (interacts with) WP_124155194_2	42.31
1954	8	54.348	1	interacts with	RCJ40334_3 (interacts with) WP_167721203_8	44.64
1955	8	41.071	1	interacts with	RCJ40334_3 (interacts with) WP_015216084_5	41.07
1956	9	55.814	1	interacts with	RCJ40334_3 (interacts with) BAZ42602_1	42.86
1957	7	58.537	1	interacts with	RCJ40334_3 (interacts with) WP_169219633_3	42.86
1958	13	56.0	1	interacts with	RCJ40334_3 (interacts with) WP_019495762_1	50.0
1959	7	50.0	1	interacts with	RCJ40334_3 (interacts with) WP_171977306_3	41.07
1960	9	45.0	1	interacts with	RCJ40334_3 (interacts with) BAZ42602_5	48.21
1961	10	51.02	1	interacts with	RCJ40334_3 (interacts with) RCJ19623_1	44.64
1962	12	60.976	1	interacts with	RCJ40334_3 (interacts with) WP_086760950_12	44.64
1964	18	79.487	1	interacts with	RCJ40334_3 (interacts with) WP_162398402_1	55.36
1965	8	48.98	1	interacts with	RCJ40334_3 (interacts with) WP_168643398_4	42.86
1966	7	42.593	1	interacts with	RCJ40334_3 (interacts with) WP_096569967_4	41.07
1968	8	42.593	1	interacts with	RCJ40334_3 (interacts with) WP_155746097_1	41.07
1969	8	49.02	1	interacts with	RCJ40334_3 (interacts with) WP_124970176_14	48.08
1970	11	61.905	1	interacts with	RCJ40334_3 (interacts with) WP_138499827_1	46.43
1972	18	80.952	1	interacts with	RCJ40334_3 (interacts with) WP_012409787_4	60.71
1973	7	43.636	1	interacts with	RCJ40334_3 (interacts with) WP_002735885_4	42.86
1974	9	53.191	1	interacts with	RCJ40334_3 (interacts with) TRT88208_1	44.64
1975	11	52.083	1	interacts with	RCJ40334_3 (interacts with) WP_138499827_5	44.64
1976	8	48.98	1	interacts with	RCJ40334_3 (interacts with) WP_012409787_3	42.86
1977	7	46.0	1	interacts with	RCJ40334_3 (interacts with) WP_106289349_3	41.07
1978	8	50.0	1	interacts with	RCJ40334_3 (interacts with) WP_096689510_6	41.07
1979	13	56.0	1	interacts with	RCJ40334_3 (interacts with) WP_127078868_1	50.0
1980	11	51.02	1	interacts with	RCJ40334_3 (interacts with) WP_106289349_2	44.64
1981	12	59.184	1	interacts with	RCJ40334_3 (interacts with) WP_096688632_1	51.79
1982	15	53.061	1	interacts with	WP_017198207_2 (interacts with) WP_052680420_4	47.27
1983	4	40.426	1	interacts with	WP_017198207_2 (interacts with) WP_052808529_1	41.3
1984	14	49.057	1	interacts with	WP_017198207_2 (interacts with) WP_051837683_5	47.27
1985	14	49.057	1	interacts with	WP_017198207_2 (interacts with) WP_052680420_3	47.27
1986	14	49.057	1	interacts with	WP_017198207_2 (interacts with) WP_051700182_4	47.27
1987	16	54.717	1	interacts with	WP_017198207_2 (interacts with) AWS47415_3	52.73
1989	27	80.357	1	interacts with	WP_017198207_2 (interacts with) WP_017198207_5	81.82
1990	="0.001"	40.426	1	interacts with	WP_017198207_2 (interacts with) WP_164394909_1	41.3
1991	9	45.098	1	interacts with	WP_017198207_2 (interacts with) WP_138689268_3	41.82
1992	16	57.407	1	interacts with	WP_017198207_2 (interacts with) PZN41733_3	57.41
1993	9	48.889	1	interacts with	WP_017198207_2 (interacts with) SNT25203_1	40.0
1994	16	55.102	1	interacts with	WP_017198207_2 (interacts with) WP_051700182_2	49.09
1995	4	40.426	1	interacts with	WP_017198207_2 (interacts with) WP_049976882_1	41.3
1996	17	54.545	1	interacts with	WP_017198207_2 (interacts with) WP_170198719_2	54.55
1997	9	47.059	1	interacts with	WP_017198207_2 (interacts with) WP_138666048_2	43.64
1999	8	46.512	1	interacts with	WP_017198207_2 (interacts with) WP_159425899_3	40.82
2000	16	55.102	1	interacts with	WP_017198207_2 (interacts with) WP_051837683_4	49.09
2001	11	69.697	0	interacts with	WP_017198207_2 (interacts with) WP_017198207_3	41.82
2002	10	45.098	1	interacts with	WP_017198207_2 (interacts with) WP_051837683_3	41.82
2003	9	45.098	1	interacts with	WP_017198207_2 (interacts with) WP_091097544_2	41.82
2004	8	41.818	1	interacts with	WP_017198207_2 (interacts with) WP_016570561_1	41.82
2005	9	47.059	1	interacts with	WP_017198207_2 (interacts with) WP_127931424_2	43.64
2006	4	42.553	1	interacts with	WP_017198207_2 (interacts with) WP_107777750_1	43.48
2007	5	41.509	1	interacts with	WP_017198207_2 (interacts with) WP_030169499_4	40.0
2008	8	53.846	1	interacts with	WP_019501955_12 (interacts with) WP_124970176_14	40.38
2009	10	43.333	1	interacts with	WP_019501955_12 (interacts with) WP_086769105_3	40.62
2010	10	47.273	1	interacts with	WP_019501955_12 (interacts with) AVH79607_2	40.63
2012	8	46.032	1	interacts with	WP_019501955_12 (interacts with) WP_019499235_2	45.31
2013	11	60.526	1	interacts with	WP_019501955_12 (interacts with) WP_096537472_3	40.35
2014	12	52.381	1	interacts with	WP_019501955_12 (interacts with) WP_087592205_6	41.51
2016	13	63.158	1	interacts with	WP_019501955_12 (interacts with) WP_019501955_6	40.68
2017	12	65.789	1	interacts with	WP_106240815_2 (interacts with) WP_099068319_4	40.98
2018	15	55.932	1	interacts with	WP_106240815_2 (interacts with) WP_070396036_1	47.14
2019	13	50.0	1	interacts with	WP_106240815_2 (interacts with) WP_053455886_1	44.62
2020	13	50.0	1	interacts with	WP_106240815_2 (interacts with) BBD63560_4	44.62
2021	14	57.143	1	interacts with	WP_106240815_2 (interacts with) WP_087542717_3	45.71
2022	11	65.789	1	interacts with	WP_106240815_2 (interacts with) WP_096537472_3	43.86
2023	13	40.845	1	interacts with	WP_106240815_2 (interacts with) CEJ45116_2	41.43
2024	13	50.847	1	interacts with	WP_106240815_2 (interacts with) WP_096569967_5	42.86
2025	14	49.275	1	interacts with	WP_106240815_2 (interacts with) WP_099700413_4	48.57
2026	13	44.595	1	interacts with	WP_106240815_2 (interacts with) WP_099700413_2	47.14
2027	17	58.462	1	interacts with	WP_106240815_2 (interacts with) WP_086769105_3	55.07
2028	15	69.231	1	interacts with	WP_106240815_2 (interacts with) WP_017314970_2	41.54
2029	16	73.684	0	interacts with	WP_106240815_2 (interacts with) WP_106240815_3	40.0
2030	18	64.151	1	interacts with	WP_106240815_2 (interacts with) WP_068385845_3	48.57
2031	16	58.491	1	interacts with	WP_106240815_2 (interacts with) WP_096689510_6	48.44
2032	12	46.377	1	interacts with	WP_106240815_2 (interacts with) TVP62740_1	45.71
2033	13	60.0	1	interacts with	WP_106240815_2 (interacts with) WP_027843178_3	42.11
2035	15	47.458	1	interacts with	WP_106240815_2 (interacts with) WP_015207767_5	40.0
2037	14	46.154	1	interacts with	WP_096579222_1 (interacts with) WP_088242795_2	41.1
2038	10	44.0	1	interacts with	WP_096579222_1 (interacts with) WP_096575011_2	40.24
2039	10	44.595	1	interacts with	WP_096579222_1 (interacts with) WP_015113151_1	40.74
2040	9	47.692	1	interacts with	WP_096579222_1 (interacts with) WP_069073064_6	41.89
2041	9	44.444	1	interacts with	WP_096579222_1 (interacts with) WP_096559014_1	42.1
2042	11	45.333	1	interacts with	WP_096579222_1 (interacts with) WP_015113151_4	40.0
2043	33	75.385	1	interacts with	WP_096579222_1 (interacts with) WP_073639381_1	68.06
2045	13	44.872	1	interacts with	WP_096579222_1 (interacts with) WP_015113151_3	41.18
2046	21	55.224	1	interacts with	WP_096579222_1 (interacts with) WP_044449859_1	53.62
2047	22	53.933	1	interacts with	WP_096575011_6 (interacts with) WP_096559014_1	63.16
2048	19	49.412	1	interacts with	WP_096575011_6 (interacts with) WP_096536886_5	55.26
2049	20	54.118	1	interacts with	WP_096575011_6 (interacts with) WP_015212417_1	58.97
2050	18	50.617	1	interacts with	WP_096575011_6 (interacts with) WP_167725682_2	48.24
2051	16	45.122	1	interacts with	WP_096575011_6 (interacts with) WP_073639381_1	51.39
2052	21	50.588	1	interacts with	WP_096575011_6 (interacts with) CEJ45116_2	50.59
2053	12	40.0	1	interacts with	WP_096575011_6 (interacts with) CEJ45116_5	41.46
2054	20	51.765	1	interacts with	WP_096575011_6 (interacts with) WP_099071810_1	57.9
2055	12	46.512	1	interacts with	WP_096575011_6 (interacts with) TAE59458_3	50.63
2056	22	57.143	1	interacts with	WP_096575011_6 (interacts with) WP_016950446_1	57.14
2057	22	58.824	1	interacts with	WP_096575011_6 (interacts with) WP_096559014_4	62.5
2058	20	55.294	1	interacts with	WP_096575011_6 (interacts with) WP_013190203_1	61.04
2059	13	43.529	1	interacts with	WP_096575011_6 (interacts with) OBQ18754_2	44.58
2060	20	54.118	1	interacts with	WP_096575011_6 (interacts with) WP_015212417_2	58.97
2061	14	46.429	1	interacts with	WP_096575011_6 (interacts with) WP_069073064_6	52.7
2062	15	45.679	1	interacts with	WP_096575011_6 (interacts with) RCJ30949_2	47.44
2063	15	46.429	1	interacts with	WP_096575011_6 (interacts with) WP_069073064_1	45.88
2064	21	55.556	1	interacts with	WP_096575011_6 (interacts with) TVP62740_1	56.96
2065	19	53.086	1	interacts with	WP_096575011_6 (interacts with) RCJ30949_4	56.58
2066	11	46.341	1	interacts with	WP_096575011_6 (interacts with) WP_087539234_1	44.71
2067	21	51.765	1	interacts with	WP_096575011_6 (interacts with) RCJ14929_3	58.67
2068	19	52.381	1	interacts with	WP_096575011_6 (interacts with) WP_089091039_2	55.7
2069	15	50.617	1	interacts with	WP_096575011_6 (interacts with) BAZ29283_3	51.9
2070	22	50.588	1	interacts with	WP_096575011_6 (interacts with) WP_096569967_5	55.84
2071	15	45.238	1	interacts with	WP_096575011_6 (interacts with) WP_044449859_1	55.07
2072	21	54.217	1	interacts with	WP_096575011_6 (interacts with) WP_073644071_5	60.0
2073	8	41.975	1	interacts with	WP_096575011_6 (interacts with) WP_044449859_3	43.04
2074	23	58.824	1	interacts with	WP_096575011_6 (interacts with) WP_006195640_7	64.1
2075	13	50.685	1	interacts with	WP_096575011_6 (interacts with) WP_015155263_3	43.53
2076	25	60.0	1	interacts with	WP_096575011_6 (interacts with) WP_096575011_2	62.2
2077	18	49.412	1	interacts with	WP_096575011_6 (interacts with) WP_099071810_6	55.26
2078	14	47.561	1	interacts with	OBQ18754_2 (interacts with) WP_096559014_1	51.32
2079	14	44.444	1	interacts with	OBQ18754_2 (interacts with) WP_096536886_5	47.37
2080	12	42.529	1	interacts with	OBQ18754_2 (interacts with) CEJ45116_2	44.58
2081	12	40.741	1	interacts with	OBQ18754_2 (interacts with) WP_038089561_4	42.31
2082	16	44.156	1	interacts with	OBQ18754_2 (interacts with) TAE59458_3	43.04
2083	15	48.148	1	interacts with	OBQ18754_2 (interacts with) WP_096559014_4	48.75
2085	12	54.902	1	interacts with	WP_019501955_4 (interacts with) WP_168643398_4	42.42
2086	11	57.778	1	interacts with	WP_019501955_4 (interacts with) WP_096688632_5	45.61
2087	9	63.158	1	interacts with	WP_019501955_4 (interacts with) WP_011610106_2	42.11
2088	9	60.526	1	interacts with	WP_019501955_4 (interacts with) WP_124155194_2	44.23
2089	14	50.0	1	interacts with	WP_019501955_4 (interacts with) WP_138498533_4	47.46
2090	11	59.574	1	interacts with	WP_019501955_4 (interacts with) WP_124970176_6	42.42
2091	7	42.857	1	interacts with	WP_019501955_4 (interacts with) WP_012597836_7	40.38
2092	13	49.153	1	interacts with	WP_019501955_4 (interacts with) WP_103138325_3	43.94
2093	9	44.231	1	interacts with	WP_019501955_4 (interacts with) RCJ40334_3	41.07
2094	10	64.103	1	interacts with	WP_019501955_4 (interacts with) WP_124970176_14	48.08
2095	14	67.442	1	interacts with	WP_019501955_4 (interacts with) WP_124970176_9	51.79
2097	11	60.976	1	interacts with	WP_019501955_4 (interacts with) WP_015216084_8	40.98
2098	11	62.162	1	interacts with	WP_019501955_4 (interacts with) WP_006197379_2	40.35
2100	12	63.415	1	interacts with	WP_019501955_4 (interacts with) WP_138498533_6	41.94
2101	9	50.0	1	interacts with	WP_019501955_4 (interacts with) WP_096689510_2	42.42
2102	10	48.333	1	interacts with	WP_019501955_4 (interacts with) AVH79628_3	43.94
2103	12	59.091	1	interacts with	WP_019501955_4 (interacts with) WP_002735885_4	42.62
2105	12	54.098	1	interacts with	WP_019501955_4 (interacts with) AVH79628_2	50.0
2106	12	48.438	1	interacts with	WP_019501955_4 (interacts with) WP_096589596_4	46.97
2107	11	60.976	1	interacts with	WP_019501955_4 (interacts with) WP_015216084_7	42.37
2108	14	60.465	1	interacts with	WP_019501955_4 (interacts with) TRT88208_1	44.07
2109	10	40.26	1	interacts with	WP_019501955_4 (interacts with) WP_019495762_1	46.97
2110	10	62.162	1	interacts with	WP_019501955_4 (interacts with) WP_012595952_5	41.82
2111	12	52.941	1	interacts with	WP_019501955_4 (interacts with) WP_012409787_3	40.91
2112	11	62.162	1	interacts with	WP_019501955_4 (interacts with) OBQ01900_2	41.82
2113	9	45.0	1	interacts with	WP_019501955_4 (interacts with) WP_171977306_3	43.55
2114	9	48.333	1	interacts with	WP_019501955_4 (interacts with) AVH79456_3	43.94
2115	10	49.091	1	interacts with	WP_019501955_4 (interacts with) WP_106289349_3	40.91
2116	9	41.379	1	interacts with	WP_019501955_4 (interacts with) WP_138499827_4	40.0
2117	11	46.479	1	interacts with	WP_019501955_4 (interacts with) WP_109013279_1	50.0
2118	14	51.786	1	interacts with	WP_019501955_4 (interacts with) WP_086835908_1	49.15
2119	13	51.786	1	interacts with	WP_019501955_4 (interacts with) WP_138498533_3	50.0
2120	11	43.548	1	interacts with	WP_019501955_4 (interacts with) AVH79607_5	40.91
2121	11	60.976	1	interacts with	WP_019501955_4 (interacts with) WP_015216084_6	41.67
2122	10	48.214	1	interacts with	WP_019501955_4 (interacts with) WP_127078868_1	40.91
2123	9	42.857	1	interacts with	WP_019501955_4 (interacts with) WP_087592205_11	41.18
2124	13	55.357	1	interacts with	WP_019501955_4 (interacts with) WP_138499827_2	46.97
2125	13	51.562	1	interacts with	WP_019501955_4 (interacts with) WP_167721203_2	50.0
2126	11	48.438	1	interacts with	WP_019501955_4 (interacts with) WP_104899482_2	46.97
2127	10	50.0	1	interacts with	WP_019501955_4 (interacts with) WP_019501955_6	40.68
2128	12	52.727	1	interacts with	WP_019501955_4 (interacts with) WP_096688632_1	43.94
2130	33	77.941	1	interacts with	WP_163699711_3 (interacts with) WP_163670238_2	77.94
2131	14	45.57	1	interacts with	WP_011321056_1 (interacts with) WP_096559014_1	47.37
2132	11	41.25	1	interacts with	WP_011321056_1 (interacts with) WP_096536886_5	43.42
2133	18	52.439	1	interacts with	WP_011321056_1 (interacts with) WP_015212417_1	55.13
2135	37	61.905	1	interacts with	WP_011321056_1 (interacts with) WP_066383651_1	81.25
2136	13	43.243	1	interacts with	WP_011321056_1 (interacts with) WP_167725682_2	40.0
2137	11	49.091	1	interacts with	WP_011321056_1 (interacts with) WP_015207767_1	42.19
2138	9	43.478	1	interacts with	WP_011321056_1 (interacts with) WP_073639381_1	41.67
2139	25	58.824	1	interacts with	WP_011321056_1 (interacts with) WP_026100063_2	62.5
2141	9	41.333	1	interacts with	WP_011321056_1 (interacts with) WP_011321056_8	42.47
2142	12	40.476	1	interacts with	WP_011321056_1 (interacts with) CEJ45116_2	42.5
2143	10	40.0	1	interacts with	WP_011321056_1 (interacts with) WP_099071810_1	42.11
2144	18	48.75	1	interacts with	WP_011321056_1 (interacts with) TAE59458_3	49.37
2145	15	48.052	1	interacts with	WP_011321056_1 (interacts with) WP_016950446_1	46.25
2146	16	47.5	1	interacts with	WP_011321056_1 (interacts with) WP_096559014_4	47.5
2147	16	50.649	1	interacts with	WP_011321056_1 (interacts with) WP_013190203_1	50.65
2148	15	44.444	1	interacts with	WP_011321056_1 (interacts with) OBQ18754_2	45.0
2149	13	42.353	1	interacts with	WP_011321056_1 (interacts with) WP_096575011_6	45.0
2150	17	51.22	1	interacts with	WP_011321056_1 (interacts with) WP_015212417_2	53.85
2151	16	50.649	1	interacts with	WP_011321056_1 (interacts with) WP_069073064_6	52.7
2152	13	49.351	1	interacts with	WP_011321056_1 (interacts with) RCJ30949_2	48.72
2153	15	46.053	1	interacts with	WP_011321056_1 (interacts with) WP_069073064_1	43.75
2154	19	46.429	1	interacts with	WP_011321056_1 (interacts with) WP_012409362_6	48.75
2156	15	43.529	1	interacts with	WP_011321056_1 (interacts with) WP_026100063_7	46.25
2157	15	51.282	1	interacts with	WP_011321056_1 (interacts with) RCJ30949_4	52.63
2158	39	76.829	1	interacts with	WP_011321056_1 (interacts with) WP_096681247_5	78.75
2159	13	43.038	1	interacts with	WP_011321056_1 (interacts with) RCJ14929_3	45.33
2160	16	42.529	1	interacts with	WP_011321056_1 (interacts with) WP_015127932_2	46.25
2161	8	44.156	1	interacts with	WP_011321056_1 (interacts with) WP_089091039_2	43.04
2162	22	51.765	1	interacts with	WP_011321056_1 (interacts with) WP_138499068_5	55.0
2163	17	46.154	1	interacts with	WP_011321056_1 (interacts with) BAZ29283_3	45.57
2164	18	52.5	1	interacts with	WP_011321056_1 (interacts with) WP_096569967_5	54.55
2165	11	49.091	1	interacts with	WP_011321056_1 (interacts with) WP_015207763_1	42.19
2166	12	46.154	1	interacts with	WP_011321056_1 (interacts with) WP_044449859_1	52.17
2167	10	40.26	1	interacts with	WP_011321056_1 (interacts with) WP_073644071_5	41.33
2168	11	45.0	1	interacts with	WP_011321056_1 (interacts with) WP_006195640_7	46.15
2169	13	69.231	0	interacts with	WP_011321056_1 (interacts with) WP_017314970_2	41.54
2170	12	42.5	1	interacts with	WP_011321056_1 (interacts with) WP_099071810_6	44.74
2171	42	81.818	1	interacts with	WP_011321056_1 (interacts with) WP_066383651_4	78.75
2172	9	60.526	0	interacts with	WP_011321056_1 (interacts with) WP_027843178_3	40.35
2173	16	51.724	1	interacts with	WP_053455886_2 (interacts with) WP_035150190_4	46.15
2174	14	67.5	0	interacts with	WP_053455886_2 (interacts with) WP_070396036_1	41.54
2175	7	43.103	1	interacts with	WP_053455886_2 (interacts with) WP_096728455_2	42.37
2176	13	60.526	1	interacts with	WP_053455886_2 (interacts with) WP_124155194_2	44.23
2177	39	96.923	1	interacts with	WP_053455886_2 (interacts with) WP_053455886_3	96.92
2179	11	51.923	1	interacts with	WP_053455886_2 (interacts with) WP_096576757_1	41.54
2180	11	54.0	1	interacts with	WP_053455886_2 (interacts with) WP_103136595_2	41.54
2181	12	56.522	1	interacts with	WP_053455886_2 (interacts with) WP_099068319_2	42.62
2183	11	51.923	1	interacts with	WP_053455886_2 (interacts with) WP_096576751_1	41.54
2184	13	46.774	1	interacts with	WP_053455886_2 (interacts with) BAY08128_2	44.62
2185	42	100.0	1	interacts with	WP_053455886_2 (interacts with) RCJ40850_1	100.0
2187	14	46.429	1	interacts with	WP_053455886_2 (interacts with) WP_015193424_5	40.0
2189	14	51.724	1	interacts with	WP_053455886_2 (interacts with) WP_105222244_2	46.15
2190	14	67.5	1	interacts with	WP_053455886_2 (interacts with) WP_169219633_3	41.54
2192	16	46.269	1	interacts with	WP_053455886_2 (interacts with) WP_015193424_3	47.69
2193	42	100.0	1	interacts with	WP_053455886_2 (interacts with) BBD63560_4	100.0
2194	42	100.0	1	interacts with	WP_053455886_2 (interacts with) WP_053455886_1	100.0
2195	15	54.839	1	interacts with	WP_053455886_2 (interacts with) WP_087542717_3	52.31
2196	15	62.222	1	interacts with	WP_053455886_2 (interacts with) WP_068385845_2	43.08
2197	15	54.386	1	interacts with	WP_053455886_2 (interacts with) WP_096580419_1	47.69
2198	12	46.774	1	interacts with	WP_053455886_2 (interacts with) BAY08128_1	44.62
2199	11	62.162	1	interacts with	WP_053455886_2 (interacts with) WP_096537472_3	40.35
2200	42	100.0	1	interacts with	WP_053455886_2 (interacts with) BBD63560_3	100.0
2201	15	49.123	1	interacts with	WP_053455886_2 (interacts with) WP_086769105_4	43.08
2202	13	54.348	1	interacts with	WP_053455886_2 (interacts with) TAG67909_1	40.98
2203	12	63.158	1	interacts with	WP_053455886_2 (interacts with) WP_099068319_5	41.38
2204	10	43.333	1	interacts with	WP_053455886_2 (interacts with) WP_009343975_1	40.0
2206	14	58.929	1	interacts with	WP_053455886_2 (interacts with) WP_087542717_4	50.77
2208	9	40.625	1	interacts with	WP_053455886_2 (interacts with) WP_068385845_5	40.0
2209	14	58.929	1	interacts with	WP_053455886_2 (interacts with) WP_087542717_2	50.77
2211	14	42.188	1	interacts with	WP_053455886_2 (interacts with) WP_015193424_4	41.54
2212	13	51.724	1	interacts with	WP_053455886_2 (interacts with) WP_099700413_4	46.15
2214	11	51.923	1	interacts with	WP_053455886_2 (interacts with) WP_015189896_1	41.54
2215	13	50.0	1	interacts with	WP_053455886_2 (interacts with) WP_106240815_2	44.62
2216	10	46.0	1	interacts with	WP_053455886_2 (interacts with) WP_124970176_9	41.07
2217	16	49.296	1	interacts with	WP_053455886_2 (interacts with) WP_017748579_3	53.85
2218	10	59.459	1	interacts with	WP_053455886_2 (interacts with) WP_096537472_5	40.0
2219	11	49.091	1	interacts with	WP_053455886_2 (interacts with) WP_096689510_2	41.54
2220	17	61.224	1	interacts with	WP_053455886_2 (interacts with) WP_017314970_3	46.15
2221	7	40.845	1	interacts with	WP_053455886_2 (interacts with) WP_069073064_6	44.62
2222	13	51.724	1	interacts with	WP_053455886_2 (interacts with) WP_099700413_2	46.15
2224	10	45.614	1	interacts with	WP_053455886_2 (interacts with) WP_015189896_2	40.0
2225	12	57.895	1	interacts with	WP_053455886_2 (interacts with) OBQ01900_2	40.0
2226	15	50.0	1	interacts with	WP_053455886_2 (interacts with) WP_086769105_3	41.54
2228	11	42.373	1	interacts with	WP_053455886_2 (interacts with) BAZ33272_4	40.98
2229	11	46.552	1	interacts with	WP_053455886_2 (interacts with) WP_071107270_2	41.54
2230	17	61.224	1	interacts with	WP_053455886_2 (interacts with) WP_017314970_4	46.15
2231	12	57.143	1	interacts with	WP_053455886_2 (interacts with) OBQ01900_3	40.68
2232	17	61.224	1	interacts with	WP_053455886_2 (interacts with) WP_017314970_2	46.15
2233	13	52.0	1	interacts with	WP_053455886_2 (interacts with) WP_106240815_3	40.0
2234	15	62.222	1	interacts with	WP_053455886_2 (interacts with) WP_068385845_3	43.08
2235	17	61.224	1	interacts with	WP_053455886_2 (interacts with) WP_017314970_1	46.15
2236	11	55.263	1	interacts with	WP_053455886_2 (interacts with) WP_087592205_11	41.18
2238	8	40.0	1	interacts with	WP_053455886_2 (interacts with) WP_035150190_1	40.0
2240	10	45.614	1	interacts with	WP_053455886_2 (interacts with) WP_096689510_4	40.0
2241	40	96.923	1	interacts with	WP_053455886_2 (interacts with) BBD63560_1	96.92
2242	11	60.526	1	interacts with	WP_027843178_1 (interacts with) WP_099068319_4	40.35
2243	40	100.0	1	interacts with	WP_027843178_1 (interacts with) WP_027845719_1	100.0
2244	13	61.538	0	interacts with	WP_027843178_1 (interacts with) WP_070396036_1	42.1
2245	8	52.0	1	interacts with	WP_027843178_1 (interacts with) WP_096728455_2	45.61
2247	6	41.935	1	interacts with	WP_027843178_1 (interacts with) WP_167717694_3	45.61
2248	8	43.86	1	interacts with	WP_027843178_1 (interacts with) WP_124970176_6	43.86
2249	11	46.0	1	interacts with	WP_027843178_1 (interacts with) WP_015216084_5	40.35
2250	10	48.936	1	interacts with	WP_027843178_1 (interacts with) WP_096576757_1	40.35
2251	11	43.103	1	interacts with	WP_027843178_1 (interacts with) WP_006195640_4	43.86
2252	11	50.0	1	interacts with	WP_027843178_1 (interacts with) WP_167725682_2	45.61
2253	12	44.444	1	interacts with	WP_027843178_1 (interacts with) WP_169219633_3	42.1
2254	13	47.368	1	interacts with	WP_027843178_1 (interacts with) WP_015193424_3	47.37
2255	10	45.283	1	interacts with	WP_027843178_1 (interacts with) BAZ29283_1	42.11
2256	21	62.963	1	interacts with	WP_027843178_1 (interacts with) WP_015207767_1	59.65
2257	12	56.098	0	interacts with	WP_027843178_1 (interacts with) WP_019495762_1	40.35
2258	11	50.0	1	interacts with	WP_027843178_1 (interacts with) WP_096730381_2	45.61
2259	10	41.071	1	interacts with	WP_027843178_1 (interacts with) WP_106218514_1	40.35
2260	21	61.818	1	interacts with	WP_027843178_1 (interacts with) WP_015207767_4	59.65
2261	12	58.974	1	interacts with	WP_027843178_1 (interacts with) WP_096580419_1	40.35
2262	9	60.526	0	interacts with	WP_027843178_1 (interacts with) WP_011321056_5	40.35
2263	10	46.939	1	interacts with	WP_027843178_1 (interacts with) BAZ29283_3	40.35
2264	11	60.526	1	interacts with	WP_027843178_1 (interacts with) WP_096569967_3	40.35
2265	12	61.538	1	interacts with	WP_027843178_1 (interacts with) WP_086769105_4	42.1
2266	11	48.936	1	interacts with	WP_027843178_1 (interacts with) WP_070396036_3	40.35
2267	10	46.296	1	interacts with	WP_027843178_1 (interacts with) CEJ45116_2	43.86
2268	10	48.936	1	interacts with	WP_027843178_1 (interacts with) WP_087539234_4	40.35
2270	12	57.5	0	interacts with	WP_027843178_1 (interacts with) WP_155746097_2	40.35
2271	11	54.762	1	interacts with	WP_027843178_1 (interacts with) WP_096569967_5	40.35
2272	21	62.963	1	interacts with	WP_027843178_1 (interacts with) WP_015207763_1	59.65
2273	12	63.158	1	interacts with	WP_027843178_1 (interacts with) WP_099068319_5	42.11
2274	10	60.526	1	interacts with	WP_027843178_1 (interacts with) WP_096569967_4	40.35
2276	12	48.148	1	interacts with	WP_027843178_1 (interacts with) WP_008178764_1	45.61
2277	9	48.98	1	interacts with	WP_027843178_1 (interacts with) WP_124970176_14	46.15
2278	13	60.0	1	interacts with	WP_027843178_1 (interacts with) WP_106240815_2	42.11
2279	12	46.429	1	interacts with	WP_027843178_1 (interacts with) WP_017748579_3	45.61
2280	12	46.154	1	interacts with	WP_027843178_1 (interacts with) WP_096689510_2	42.11
2281	9	60.526	0	interacts with	WP_027843178_1 (interacts with) WP_011321056_1	40.35
2282	11	46.939	1	interacts with	WP_027843178_1 (interacts with) WP_015216084_7	40.35
2283	40	100.0	1	interacts with	WP_027843178_1 (interacts with) WP_027843178_2	100.0
2284	11	51.111	1	interacts with	WP_027843178_1 (interacts with) WP_089091039_3	40.35
2285	12	61.538	1	interacts with	WP_027843178_1 (interacts with) WP_086769105_3	42.1
2286	10	46.296	1	interacts with	WP_027843178_1 (interacts with) CEJ45116_1	43.86
2287	12	63.158	1	interacts with	WP_027843178_1 (interacts with) WP_017314970_2	42.11
2288	12	60.526	0	interacts with	WP_027843178_1 (interacts with) WP_106240815_3	40.35
2289	11	46.939	1	interacts with	WP_027843178_1 (interacts with) WP_015216084_6	40.35
2290	12	63.158	1	interacts with	WP_027843178_1 (interacts with) WP_017314970_1	42.11
2291	40	100.0	1	interacts with	WP_027843178_1 (interacts with) WP_027843178_3	100.0
2292	12	56.098	0	interacts with	WP_027843178_1 (interacts with) WP_127078868_1	40.35
2293	13	58.974	0	interacts with	WP_027843178_1 (interacts with) WP_015207767_5	40.35
2294	16	45.714	1	interacts with	WP_114082527_7 (interacts with) WP_162399505_5	45.71
2295	30	68.571	1	interacts with	WP_114082527_7 (interacts with) WP_138499068_8	68.57
2296	16	45.714	1	interacts with	WP_114082527_7 (interacts with) RCJ30949_9	45.71
2297	15	41.791	1	interacts with	WP_114082527_7 (interacts with) WP_096664869_5	40.58
2298	9	40.244	1	interacts with	WP_114082527_7 (interacts with) WP_015127932_1	47.14
2299	41	85.714	1	interacts with	WP_114082527_7 (interacts with) WP_012409362_9	85.71
2300	19	48.571	1	interacts with	WP_114082527_7 (interacts with) WP_015127932_7	48.57
2301	16	44.928	1	interacts with	WP_114082527_7 (interacts with) WP_015210601_6	44.29
2302	14	41.667	1	interacts with	WP_114082527_7 (interacts with) WP_038089561_4	42.86
2303	15	41.791	1	interacts with	WP_114082527_7 (interacts with) OBQ18754_3	40.58
2304	12	64.103	1	interacts with	WP_096689510_5 (interacts with) WP_099068319_4	40.98
2305	13	46.774	1	interacts with	WP_096689510_5 (interacts with) WP_070396036_1	44.62
2306	15	56.818	1	interacts with	WP_096689510_5 (interacts with) WP_124155194_2	48.08
2307	16	57.143	1	interacts with	WP_096689510_5 (interacts with) WP_087542717_3	49.23
2308	14	50.877	1	interacts with	WP_096689510_5 (interacts with) WP_017318973_3	44.62
2309	12	64.103	1	interacts with	WP_096689510_5 (interacts with) WP_096537472_3	43.86
2310	12	57.895	1	interacts with	WP_096689510_5 (interacts with) WP_087592205_6	41.51
2311	12	47.273	1	interacts with	WP_096689510_5 (interacts with) WP_070396036_3	40.0
2312	10	47.619	1	interacts with	WP_096689510_5 (interacts with) CEJ45116_2	46.15
2313	7	51.852	1	interacts with	WP_096689510_5 (interacts with) WP_038089561_4	43.08
2314	17	51.515	1	interacts with	WP_096689510_5 (interacts with) WP_099700413_4	52.31
2315	9	50.0	1	interacts with	WP_096689510_5 (interacts with) WP_124970176_14	42.31
2316	17	50.0	1	interacts with	WP_096689510_5 (interacts with) WP_106240815_2	50.77
2317	17	55.556	1	interacts with	WP_096689510_5 (interacts with) WP_017748579_3	53.85
2318	14	48.276	1	interacts with	WP_096689510_5 (interacts with) WP_006197379_2	49.12
2319	12	44.444	1	interacts with	WP_096689510_5 (interacts with) WP_096689510_2	43.08
2320	9	40.0	1	interacts with	WP_096689510_5 (interacts with) WP_086760950_4	40.0
2321	16	48.485	1	interacts with	WP_096689510_5 (interacts with) WP_099700413_2	49.23
2323	14	60.0	1	interacts with	WP_096689510_5 (interacts with) WP_152591271_1	41.54
2324	14	66.667	1	interacts with	WP_096689510_5 (interacts with) WP_086769105_3	40.0
2325	14	69.231	1	interacts with	WP_096689510_5 (interacts with) WP_138499827_4	45.0
2326	15	62.222	1	interacts with	WP_096689510_5 (interacts with) WP_017314970_2	43.08
2327	34	82.812	1	interacts with	WP_096689510_5 (interacts with) WP_096689510_6	82.81
2328	19	53.968	1	interacts with	WP_096689510_5 (interacts with) WP_068385845_3	52.31
2329	15	72.973	1	interacts with	WP_017314970_3 (interacts with) WP_099068319_4	44.26
2330	12	55.556	1	interacts with	WP_017314970_3 (interacts with) WP_011610106_2	43.86
2331	13	63.158	1	interacts with	WP_017314970_3 (interacts with) WP_138498533_4	40.68
2332	14	56.522	1	interacts with	WP_017314970_3 (interacts with) WP_015216084_5	40.63
2333	13	56.25	1	interacts with	WP_017314970_3 (interacts with) WP_015212417_1	41.54
2334	16	70.0	0	interacts with	WP_017314970_3 (interacts with) WP_167725682_2	43.08
2335	13	60.417	1	interacts with	WP_017314970_3 (interacts with) WP_096559014_5	44.62
2336	17	61.224	1	interacts with	WP_017314970_3 (interacts with) WP_053455886_1	46.15
2337	17	61.224	1	interacts with	WP_017314970_3 (interacts with) BBD63560_4	46.15
2338	15	76.316	1	interacts with	WP_017314970_3 (interacts with) WP_087542717_3	44.62
2339	16	70.0	0	interacts with	WP_017314970_3 (interacts with) WP_096730381_2	43.08
2340	14	81.818	0	interacts with	WP_017314970_3 (interacts with) WP_071107270_1	41.54
2341	15	72.973	1	interacts with	WP_017314970_3 (interacts with) WP_096537472_3	47.37
2342	14	48.485	1	interacts with	WP_017314970_3 (interacts with) WP_017721129_1	50.79
2343	14	43.478	1	interacts with	WP_017314970_3 (interacts with) RCJ19623_1	46.15
2344	14	56.25	1	interacts with	WP_017314970_3 (interacts with) WP_070396036_3	55.38
2345	13	51.724	1	interacts with	WP_017314970_3 (interacts with) WP_015212417_3	46.15
2346	13	60.0	1	interacts with	WP_017314970_3 (interacts with) WP_155746097_2	41.54
2347	15	65.789	1	interacts with	WP_017314970_3 (interacts with) WP_099068319_5	43.1
2348	13	56.522	1	interacts with	WP_017314970_3 (interacts with) TAE59458_3	40.0
2349	13	57.447	1	interacts with	WP_017314970_3 (interacts with) WP_009343975_1	41.54
2350	14	68.421	0	interacts with	WP_017314970_3 (interacts with) WP_016950446_1	40.0
2351	15	62.745	1	interacts with	WP_017314970_3 (interacts with) WP_087542717_2	49.23
2352	13	60.417	1	interacts with	WP_017314970_3 (interacts with) WP_096559014_4	44.62
2353	18	59.375	1	interacts with	WP_017314970_3 (interacts with) WP_099700413_4	58.46
2354	13	62.791	1	interacts with	WP_017314970_3 (interacts with) WP_013190203_1	41.54
2355	15	69.231	1	interacts with	WP_017314970_3 (interacts with) WP_106240815_2	41.54
2356	12	56.25	1	interacts with	WP_017314970_3 (interacts with) WP_015212417_2	41.54
2357	14	69.231	0	interacts with	WP_017314970_3 (interacts with) WP_011321056_1	41.54
2358	12	63.158	1	interacts with	WP_017314970_3 (interacts with) WP_027843178_1	42.11
2359	15	56.14	1	interacts with	WP_017314970_3 (interacts with) WP_096689510_5	49.23
2360	10	57.895	1	interacts with	WP_017314970_3 (interacts with) WP_012595952_5	40.0
2361	12	52.174	1	interacts with	WP_017314970_3 (interacts with) WP_138499827_5	40.0
2362	8	45.902	1	interacts with	WP_017314970_3 (interacts with) WP_019505167_2	44.44
2363	18	60.938	1	interacts with	WP_017314970_3 (interacts with) WP_099700413_2	60.0
2364	16	72.973	0	interacts with	WP_017314970_3 (interacts with) WP_152591271_1	41.54
2365	14	58.824	1	interacts with	WP_017314970_3 (interacts with) WP_086769105_3	46.15
2366	12	63.158	1	interacts with	WP_017314970_3 (interacts with) OBQ01900_3	40.68
2367	11	41.538	1	interacts with	WP_017314970_3 (interacts with) WP_019499235_2	41.54
2368	12	65.0	1	interacts with	WP_017314970_3 (interacts with) TVP62740_1	40.0
2369	19	70.455	1	interacts with	WP_017314970_3 (interacts with) WP_068385845_3	47.69
2370	42	96.923	1	interacts with	WP_017314970_3 (interacts with) WP_017314970_1	96.92
2371	12	63.158	1	interacts with	WP_017314970_3 (interacts with) WP_027845719_1	42.11
2372	16	58.182	1	interacts with	WP_017314970_3 (interacts with) WP_070396036_1	49.23
2373	13	63.158	1	interacts with	WP_017314970_3 (interacts with) WP_124155194_2	46.15
2374	9	50.0	1	interacts with	WP_017314970_3 (interacts with) WP_096728455_2	42.37
2375	12	66.667	0	interacts with	WP_017314970_3 (interacts with) WP_015197629_3	40.0
2376	17	54.688	1	interacts with	WP_017314970_3 (interacts with) WP_105222244_2	53.85
2377	20	57.534	1	interacts with	WP_017314970_3 (interacts with) WP_169219633_3	64.62
2378	17	52.941	1	interacts with	WP_017314970_3 (interacts with) WP_015193424_3	55.38
2379	11	63.415	0	interacts with	WP_017314970_3 (interacts with) WP_096681247_5	40.0
2380	18	81.081	0	interacts with	WP_017314970_3 (interacts with) WP_096580419_1	46.15
2381	8	41.791	1	interacts with	WP_017314970_3 (interacts with) WP_019505167_3	44.44
2382	14	69.231	1	interacts with	WP_017314970_3 (interacts with) WP_011321056_5	41.54
2383	14	69.231	1	interacts with	WP_017314970_3 (interacts with) WP_096569967_3	41.54
2384	14	58.824	1	interacts with	WP_017314970_3 (interacts with) WP_086769105_4	46.15
2385	14	62.791	1	interacts with	WP_017314970_3 (interacts with) WP_096569967_5	41.54
2386	11	63.415	0	interacts with	WP_017314970_3 (interacts with) WP_096681247_2	40.0
2387	12	69.048	1	interacts with	WP_017314970_3 (interacts with) WP_044449859_1	44.62
2388	14	69.231	1	interacts with	WP_017314970_3 (interacts with) WP_096569967_4	41.54
2389	11	47.273	1	interacts with	WP_017314970_3 (interacts with) WP_103138325_3	40.0
2390	8	51.22	1	interacts with	WP_017314970_3 (interacts with) WP_124970176_14	40.38
2391	13	45.455	1	interacts with	WP_017314970_3 (interacts with) WP_015189896_1	46.15
2392	18	64.815	1	interacts with	WP_017314970_3 (interacts with) WP_017748579_3	53.85
2393	13	51.724	1	interacts with	WP_017314970_3 (interacts with) WP_071189061_2	46.15
2394	12	60.526	1	interacts with	WP_017314970_3 (interacts with) WP_006197379_2	40.35
2395	18	53.623	1	interacts with	WP_017314970_3 (interacts with) WP_015197629_1	56.92
2396	12	63.158	1	interacts with	WP_017314970_3 (interacts with) WP_027843178_2	42.11
2397	15	72.5	0	interacts with	WP_017314970_3 (interacts with) WP_015155263_3	44.62
2398	12	63.158	1	interacts with	WP_017314970_3 (interacts with) WP_086835908_1	40.68
2399	41	95.385	1	interacts with	WP_017314970_3 (interacts with) WP_017314970_2	95.39
2400	15	55.556	1	interacts with	WP_017314970_3 (interacts with) WP_106240815_3	46.15
2401	16	60.714	1	interacts with	WP_017314970_3 (interacts with) WP_096689510_6	53.12
2402	12	63.158	1	interacts with	WP_017314970_3 (interacts with) WP_027843178_3	42.11
2403	18	63.265	1	interacts with	WP_017314970_3 (interacts with) BBD63560_1	47.69
2404	41	84.507	1	interacts with	WP_086760950_4 (interacts with) WP_167721203_2	84.51
2406	27	70.312	1	interacts with	WP_015216084_12 (interacts with) WP_168643398_7	69.23
2407	27	68.75	1	interacts with	WP_015216084_12 (interacts with) WP_086760950_11	67.69
2408	10	41.538	1	interacts with	WP_015216084_12 (interacts with) WP_006513161_3	41.54
2409	10	54.167	1	interacts with	WP_015216084_12 (interacts with) WP_015216084_10	40.0
2411	29	70.312	1	interacts with	WP_015216084_12 (interacts with) AVH79456_7	69.23
2412	26	64.062	1	interacts with	WP_015216084_12 (interacts with) WP_167721203_10	63.08
2413	26	67.188	1	interacts with	WP_015216084_12 (interacts with) WP_096589596_10	66.15
2414	10	40.0	1	interacts with	WP_015216084_12 (interacts with) WP_035150190_3	43.08
2417	17	66.667	1	interacts with	WP_131089594_1 (interacts with) WP_096285992_1	53.57
2419	19	56.14	1	interacts with	WP_131089594_1 (interacts with) WP_166841243_2	56.14
2420	19	67.347	1	interacts with	WP_131089594_1 (interacts with) SLE69095_1	64.71
2421	20	66.667	1	interacts with	WP_131089594_1 (interacts with) WP_142936832_1	63.16
2422	16	57.143	1	interacts with	WP_131089594_1 (interacts with) SLE69095_3	54.9
2423	20	66.667	1	interacts with	WP_131089594_1 (interacts with) WP_166841243_1	63.16
2424	8	46.154	1	interacts with	WP_131089594_1 (interacts with) WP_052856102_2	42.11
2426	35	96.491	1	interacts with	WP_131089594_1 (interacts with) WP_061955677_1	96.49
2427	20	61.404	1	interacts with	WP_131089594_1 (interacts with) WP_091465037_2	61.4
2429	17	72.549	1	interacts with	WP_131089594_1 (interacts with) WP_061955677_2	72.55
2431	18	75.439	1	interacts with	WP_131089594_1 (interacts with) WP_131089594_2	84.31
2432	20	64.815	1	interacts with	WP_131089594_1 (interacts with) AFR27446_2	61.4
2434	17	61.224	1	interacts with	WP_131089594_1 (interacts with) WP_104291723_2	52.63
2436	19	56.14	1	interacts with	WP_131089594_1 (interacts with) WP_091465037_1	56.14
2438	9	45.161	1	interacts with	WP_103138325_4 (interacts with) AVH79628_3	41.18
2439	17	50.0	1	interacts with	WP_096664869_2 (interacts with) WP_162399505_1	53.25
2440	15	46.835	1	interacts with	WP_096664869_2 (interacts with) WP_096559014_1	48.68
2441	14	45.882	1	interacts with	WP_096664869_2 (interacts with) WP_066383651_5	48.15
2442	15	49.351	1	interacts with	WP_096664869_2 (interacts with) WP_096536886_5	50.0
2443	15	44.828	1	interacts with	WP_096664869_2 (interacts with) WP_015212417_1	50.0
2444	13	43.243	1	interacts with	WP_096664869_2 (interacts with) WP_066383651_1	55.17
2445	17	53.247	1	interacts with	WP_096664869_2 (interacts with) WP_099071810_2	53.25
2446	14	46.512	1	interacts with	WP_096664869_2 (interacts with) WP_015113151_1	49.38
2447	16	46.667	1	interacts with	WP_096664869_2 (interacts with) WP_167725682_2	40.23
2449	12	44.578	1	interacts with	WP_096664869_2 (interacts with) WP_006195640_1	45.12
2450	17	49.398	1	interacts with	WP_096664869_2 (interacts with) WP_096559014_5	51.25
2452	13	43.678	1	interacts with	WP_096664869_2 (interacts with) RCJ30949_1	47.5
2453	11	43.21	1	interacts with	WP_096664869_2 (interacts with) WP_089091039_1	42.68
2454	31	66.234	1	interacts with	WP_096664869_2 (interacts with) BAZ29283_1	66.23
2455	17	46.753	1	interacts with	WP_096664869_2 (interacts with) WP_096730381_2	41.38
2456	12	45.714	1	interacts with	WP_096664869_2 (interacts with) WP_073639381_1	44.44
2457	16	48.148	1	interacts with	WP_096664869_2 (interacts with) WP_015113151_4	45.88
2458	20	53.086	1	interacts with	WP_096664869_2 (interacts with) WP_138499068_4	50.0
2459	13	41.026	1	interacts with	WP_096664869_2 (interacts with) WP_088242795_2	43.84
2460	13	43.373	1	interacts with	WP_096664869_2 (interacts with) CEJ45116_2	41.86
2461	14	47.674	1	interacts with	WP_096664869_2 (interacts with) WP_062295185_1	49.4
2462	14	44.048	1	interacts with	WP_096664869_2 (interacts with) WP_087539234_4	45.12
2463	11	41.558	1	interacts with	WP_096664869_2 (interacts with) WP_015210601_6	45.07
2464	17	45.977	1	interacts with	WP_096664869_2 (interacts with) WP_015212417_3	51.28
2465	16	47.5	1	interacts with	WP_096664869_2 (interacts with) WP_099071810_1	50.0
2466	21	51.948	1	interacts with	WP_096664869_2 (interacts with) WP_009343975_1	51.28
2467	16	47.436	1	interacts with	WP_096664869_2 (interacts with) TAE59458_3	46.84
2468	12	42.353	1	interacts with	WP_096664869_2 (interacts with) WP_087539234_7	43.9
2469	15	44.318	1	interacts with	WP_096664869_2 (interacts with) WP_016950446_1	46.43
2470	17	49.398	1	interacts with	WP_096664869_2 (interacts with) WP_096559014_4	51.25
2471	15	47.368	1	interacts with	WP_096664869_2 (interacts with) WP_013190203_1	46.75
2472	48	89.024	1	interacts with	WP_096664869_2 (interacts with) OBQ18754_2	87.95
2473	16	47.059	1	interacts with	WP_096664869_2 (interacts with) WP_096575011_6	47.06
2474	14	45.0	1	interacts with	WP_096664869_2 (interacts with) WP_015212417_2	46.15
2475	15	46.753	1	interacts with	WP_096664869_2 (interacts with) WP_011321056_1	45.0
2476	13	48.684	1	interacts with	WP_096664869_2 (interacts with) WP_069073064_6	50.0
2477	10	41.026	1	interacts with	WP_096664869_2 (interacts with) RCJ30949_2	41.03
2478	15	48.78	1	interacts with	WP_096664869_2 (interacts with) WP_071189061_3	52.63
2479	19	53.75	1	interacts with	WP_096664869_2 (interacts with) WP_069073064_1	50.0
2481	13	43.678	1	interacts with	WP_096664869_2 (interacts with) RCJ30949_3	47.5
2482	13	43.373	1	interacts with	WP_096664869_2 (interacts with) CEJ45116_1	41.86
2483	18	48.837	1	interacts with	WP_096664869_2 (interacts with) WP_012409362_6	48.28
2484	11	43.902	1	interacts with	WP_096664869_2 (interacts with) WP_015127932_1	41.38
2485	16	51.948	1	interacts with	WP_096664869_2 (interacts with) WP_096536886_1	52.63
2486	32	70.13	1	interacts with	WP_096664869_2 (interacts with) BAZ29283_4	70.13
2487	14	49.351	1	interacts with	WP_096664869_2 (interacts with) TVP62740_1	48.1
2488	17	52.222	1	interacts with	WP_096664869_2 (interacts with) WP_096575011_3	55.29
2489	24	55.682	1	interacts with	WP_096664869_2 (interacts with) WP_168496018_1	57.65
2490	9	57.895	0	interacts with	WP_096664869_2 (interacts with) WP_099068319_6	40.0
2491	12	45.57	1	interacts with	WP_096664869_2 (interacts with) RCJ30949_4	47.37
2492	21	52.381	1	interacts with	WP_096664869_2 (interacts with) WP_138499068_1	51.16
2494	10	44.118	1	interacts with	WP_096664869_2 (interacts with) WP_069073064_8	40.54
2495	52	96.341	1	interacts with	WP_096664869_2 (interacts with) WP_168645325_1	95.18
2496	17	46.25	1	interacts with	WP_096664869_2 (interacts with) WP_096681247_5	44.58
2497	15	48.718	1	interacts with	WP_096664869_2 (interacts with) WP_069073064_5	51.35
2498	15	47.059	1	interacts with	WP_096664869_2 (interacts with) RCJ14929_3	53.33
2499	11	42.857	1	interacts with	WP_096664869_2 (interacts with) WP_015127932_2	41.38
2501	18	51.25	1	interacts with	WP_096664869_2 (interacts with) WP_015127932_3	47.67
2502	11	44.737	1	interacts with	WP_096664869_2 (interacts with) WP_089091039_2	43.04
2503	20	51.19	1	interacts with	WP_096664869_2 (interacts with) WP_138499068_5	50.0
2504	15	48.684	1	interacts with	WP_096664869_2 (interacts with) WP_011321056_5	47.44
2505	32	68.831	1	interacts with	WP_096664869_2 (interacts with) BAZ29283_3	67.09
2506	40	81.818	1	interacts with	WP_096664869_2 (interacts with) OBQ36138_1	74.12
2507	15	50.0	1	interacts with	WP_096664869_2 (interacts with) WP_096569967_3	50.67
2508	17	48.718	1	interacts with	WP_096664869_2 (interacts with) WP_096569967_5	49.35
2509	17	45.0	1	interacts with	WP_096664869_2 (interacts with) WP_096681247_2	43.37
2510	13	45.455	1	interacts with	WP_096664869_2 (interacts with) WP_044449859_1	50.73
2511	15	49.351	1	interacts with	WP_096664869_2 (interacts with) WP_096569967_4	50.0
2512	19	49.412	1	interacts with	WP_096664869_2 (interacts with) WP_012409362_8	48.84
2513	17	51.25	1	interacts with	WP_096664869_2 (interacts with) WP_015127932_4	47.67
2514	49	87.356	1	interacts with	WP_096664869_2 (interacts with) WP_168465654_1	88.37
2515	16	53.247	1	interacts with	WP_096664869_2 (interacts with) WP_073644071_5	54.67
2516	13	46.341	1	interacts with	WP_096664869_2 (interacts with) WP_071189061_2	50.0
2517	20	54.878	1	interacts with	WP_096664869_2 (interacts with) WP_096559014_8	56.96
2518	8	45.614	1	interacts with	WP_096664869_2 (interacts with) WP_006197379_2	45.61
2519	18	47.674	1	interacts with	WP_096664869_2 (interacts with) WP_012409362_5	47.13
2520	18	54.054	1	interacts with	WP_096664869_2 (interacts with) WP_027402982_2	47.06
2521	14	47.368	1	interacts with	WP_096664869_2 (interacts with) WP_006195640_7	46.15
2522	17	52.381	1	interacts with	WP_096664869_2 (interacts with) WP_066383651_2	53.66
2523	14	47.674	1	interacts with	WP_096664869_2 (interacts with) WP_089091039_3	48.23
2524	12	45.57	1	interacts with	WP_096664869_2 (interacts with) RCJ30949_5	47.37
2525	11	50.0	1	interacts with	WP_096664869_2 (interacts with) WP_017314970_2	44.62
2526	12	46.512	1	interacts with	WP_096664869_2 (interacts with) WP_096575011_2	48.78
2527	16	48.75	1	interacts with	WP_096664869_2 (interacts with) WP_099071810_6	51.32
2528	13	46.753	1	interacts with	WP_096664869_2 (interacts with) WP_087539234_2	41.38
2529	13	43.75	1	interacts with	WP_096664869_2 (interacts with) WP_066383651_4	43.75
2530	11	42.373	1	interacts with	BAZ33272_4 (interacts with) WP_053455886_1	40.98
2531	11	42.373	1	interacts with	BAZ33272_4 (interacts with) BBD63560_4	40.98
2533	9	46.552	1	interacts with	WP_016864763_2 (interacts with) WP_171977306_3	43.55
2534	7	40.0	1	interacts with	WP_016864763_2 (interacts with) AVH79535_2	43.08
2535	13	47.619	1	interacts with	WP_016864763_2 (interacts with) WP_106300787_1	43.48
2537	9	40.506	1	interacts with	WP_016864763_2 (interacts with) WP_151696789_3	43.24
2539	11	44.444	1	interacts with	WP_016864763_2 (interacts with) WP_096679519_4	41.79
2541	27	80.328	1	interacts with	WP_019505167_4 (interacts with) WP_019505167_1	70.0
2542	23	64.0	1	interacts with	WP_019505167_4 (interacts with) WP_019505167_3	76.19
2543	24	65.333	1	interacts with	WP_019505167_4 (interacts with) WP_019505167_2	77.78
2544	8	44.262	1	interacts with	WP_019505167_4 (interacts with) WP_002735885_4	44.26
2545	11	47.273	1	interacts with	WP_019505167_4 (interacts with) WP_096728455_2	44.07
2547	13	54.688	1	interacts with	WP_138499068_6 (interacts with) RCJ30949_4	46.05
2548	11	41.463	1	interacts with	WP_138499068_6 (interacts with) WP_096559014_1	44.74
2549	54	93.023	1	interacts with	WP_138499068_6 (interacts with) WP_138499068_1	93.02
2550	13	43.182	1	interacts with	WP_138499068_6 (interacts with) WP_026100063_3	44.19
2551	19	47.674	1	interacts with	WP_138499068_6 (interacts with) WP_066383651_5	50.62
2552	21	52.5	1	interacts with	WP_138499068_6 (interacts with) WP_137906310_1	48.84
2553	45	85.366	1	interacts with	WP_138499068_6 (interacts with) WP_012409362_4	81.4
2554	18	47.5	1	interacts with	WP_138499068_6 (interacts with) WP_103136595_2	44.71
2555	24	52.941	1	interacts with	WP_138499068_6 (interacts with) WP_104387267_1	54.88
2556	45	78.409	1	interacts with	WP_138499068_6 (interacts with) WP_012409362_2	80.23
2557	15	48.75	1	interacts with	WP_138499068_6 (interacts with) WP_069073064_4	50.65
2558	15	48.75	1	interacts with	WP_138499068_6 (interacts with) WP_168645325_1	46.99
2559	10	41.176	1	interacts with	WP_138499068_6 (interacts with) WP_099071810_2	45.45
2561	26	51.163	1	interacts with	WP_138499068_6 (interacts with) WP_096681247_3	53.01
2562	46	82.955	1	interacts with	WP_138499068_6 (interacts with) WP_114082527_2	84.88
2563	16	49.412	1	interacts with	WP_138499068_6 (interacts with) WP_096559014_5	52.5
2564	16	44.706	1	interacts with	WP_138499068_6 (interacts with) WP_026100063_4	46.34
2565	25	51.765	1	interacts with	WP_138499068_6 (interacts with) WP_096681247_5	53.01
2566	20	47.561	1	interacts with	WP_138499068_6 (interacts with) WP_011321056_2	50.0
2567	16	47.5	1	interacts with	WP_138499068_6 (interacts with) WP_009343975_2	50.0
2568	18	45.882	1	interacts with	WP_138499068_6 (interacts with) BAZ29283_1	50.65
2569	15	47.5	1	interacts with	WP_138499068_6 (interacts with) WP_069073064_5	51.35
2570	15	48.235	1	interacts with	WP_138499068_6 (interacts with) WP_096559014_6	51.25
2571	14	43.75	1	interacts with	WP_138499068_6 (interacts with) WP_038089561_2	40.7
2572	16	43.21	1	interacts with	WP_138499068_6 (interacts with) WP_096730381_2	40.7
2573	34	73.864	1	interacts with	WP_138499068_6 (interacts with) WP_015127932_2	75.58
2574	19	50.0	1	interacts with	WP_138499068_6 (interacts with) WP_057178590_1	55.13
2575	14	42.529	1	interacts with	WP_138499068_6 (interacts with) WP_026100063_2	43.02
2576	53	90.698	1	interacts with	WP_138499068_6 (interacts with) WP_138499068_5	90.7
2577	20	50.0	1	interacts with	WP_138499068_6 (interacts with) WP_011321056_5	52.56
2578	18	48.75	1	interacts with	WP_138499068_6 (interacts with) BAZ29283_3	49.37
2579	48	82.558	1	interacts with	WP_138499068_6 (interacts with) WP_012409362_7	82.56
2580	10	43.902	1	interacts with	WP_138499068_6 (interacts with) WP_073644071_4	48.0
2581	19	45.349	1	interacts with	WP_138499068_6 (interacts with) WP_066383651_6	49.37
2582	55	95.349	1	interacts with	WP_138499068_6 (interacts with) WP_138499068_4	95.35
2583	19	48.78	1	interacts with	WP_138499068_6 (interacts with) OBQ36138_1	47.06
2584	13	43.75	1	interacts with	WP_138499068_6 (interacts with) WP_096569967_3	46.67
2585	8	42.593	1	interacts with	WP_138499068_6 (interacts with) WP_087592205_6	43.4
2586	15	46.25	1	interacts with	WP_138499068_6 (interacts with) WP_096569967_5	48.05
2587	19	44.706	1	interacts with	WP_138499068_6 (interacts with) TAE59458_1	48.1
2588	26	51.163	1	interacts with	WP_138499068_6 (interacts with) WP_096681247_2	53.01
2589	19	45.882	1	interacts with	WP_138499068_6 (interacts with) TAE59458_3	49.37
2590	19	46.512	1	interacts with	WP_138499068_6 (interacts with) WP_009343975_1	51.28
2591	13	41.758	1	interacts with	WP_138499068_6 (interacts with) WP_016950446_1	45.24
2592	13	40.476	1	interacts with	WP_138499068_6 (interacts with) WP_087539234_7	41.46
2593	10	45.902	1	interacts with	WP_138499068_6 (interacts with) WP_138499068_8	40.0
2594	48	82.558	1	interacts with	WP_138499068_6 (interacts with) WP_012409362_8	82.56
2595	16	49.412	1	interacts with	WP_138499068_6 (interacts with) WP_096559014_4	52.5
2596	44	76.744	1	interacts with	WP_138499068_6 (interacts with) WP_015127932_4	76.74
2597	21	50.588	1	interacts with	WP_138499068_6 (interacts with) WP_015078657_2	51.81
2598	20	50.0	1	interacts with	WP_138499068_6 (interacts with) WP_168465654_1	48.84
2599	11	43.902	1	interacts with	WP_138499068_6 (interacts with) WP_073644071_5	48.0
2600	13	41.111	1	interacts with	WP_138499068_6 (interacts with) WP_016950446_3	46.84
2601	15	45.556	1	interacts with	WP_138499068_6 (interacts with) WP_013190203_1	53.25
2602	16	48.81	1	interacts with	WP_138499068_6 (interacts with) WP_096559014_8	51.9
2603	14	66.667	1	interacts with	WP_138499068_6 (interacts with) WP_071189061_2	42.11
2604	21	50.588	1	interacts with	WP_138499068_6 (interacts with) OBQ18754_2	51.81
2605	7	50.0	1	interacts with	WP_138499068_6 (interacts with) WP_006197379_2	43.86
2606	25	51.765	1	interacts with	WP_138499068_6 (interacts with) WP_096681247_6	53.01
2607	45	85.366	1	interacts with	WP_138499068_6 (interacts with) WP_012409362_5	81.4
2608	20	48.235	1	interacts with	WP_138499068_6 (interacts with) WP_011321056_1	51.25
2609	20	58.209	1	interacts with	WP_138499068_6 (interacts with) WP_027402982_2	45.88
2610	6	44.0	1	interacts with	WP_138499068_6 (interacts with) WP_012595952_5	40.0
2611	13	45.122	1	interacts with	WP_138499068_6 (interacts with) WP_069073064_6	50.0
2612	13	46.25	1	interacts with	WP_138499068_6 (interacts with) RCJ30949_2	47.44
2613	20	45.349	1	interacts with	WP_138499068_6 (interacts with) WP_066383651_2	47.56
2614	15	46.429	1	interacts with	WP_138499068_6 (interacts with) WP_096664869_2	45.35
2615	12	43.902	1	interacts with	WP_138499068_6 (interacts with) WP_089091039_4	46.75
2616	9	44.286	1	interacts with	WP_138499068_6 (interacts with) WP_073644071_8	42.47
2617	22	51.807	1	interacts with	WP_138499068_6 (interacts with) WP_069073064_1	50.0
2618	51	87.209	1	interacts with	WP_138499068_6 (interacts with) WP_114082527_5	87.21
2619	16	44.444	1	interacts with	WP_138499068_6 (interacts with) WP_096730381_1	41.86
[truncated: 28,498 more rows]
