# Supplementary material for: Understanding thioamitide biosynthesis using pathway engineering and untargeted metabolomics
Source: Royal Society of Chemistry journal article supplement (doi:10.1039/d0sc06835g), 2021-01-01
Supplement: d0sc06835g3.cys [file d0sc06835g3.cys › CytoscapeSession-2021_03_29-10_56/tables/35-cc_1.to.202.txt/SHARED_ATTRS-org.cytoscape.model.CyNode-cc_1.to.202.txt+root+shared++node.cytable]

CyCSV-Version	1
SUID	Accession	Colour	Genus	hdesc	hname	Network	Organism	PP_TE_Distance	PPSerial	Prodigalscore	SameStrand	Sequence	shared name	signif
java.lang.Long	java.lang.String	java.lang.String	java.lang.String	java.lang.String	java.lang.String	java.lang.String	java.lang.String	java.lang.Integer	java.lang.Integer	java.lang.Double	java.lang.String	java.lang.String	java.lang.String	java.lang.String
	mutable	mutable	mutable	mutable	mutable	mutable	mutable	mutable	mutable	mutable	mutable	mutable		mutable
cc_1.to.202.txt root shared node
71	WP_162399505	#2e86c1	Nostoc	none	none	cc1	Nostoc sp. B(2019)	2302	1	32.65	yes	MATITLSELRNAGSQLFQDSESFLNDLNDVDVISGGYDNFSKFYGFEKVIEGYVNVYAIGHVTYLAKSFSSNDYSAH	WP_162399505_1	none
72	WP_096559014	#2e86c1	Nostoc	none	none	cc1	Nostoc sp. NIES-4103	2106	1	38.84	yes	MANITLTELHITGSELFQDYENFLNELSDVDYIYGGTDSYSNGISDISTLVKLAEAFVDVYAIGHIAWIAKSFSKA	WP_096559014_1	none
74	WP_138498533	#2e86c1	Nostoc	NADH-ubiquinone reductase complex 1 MLRQ subunit	PF06522.11	cc1	Nostoc sp. PA-18-2419	1104	4	33.86	yes	MANIAISNLRPAGADLFDSSESFMNDLTDSELDMTKGGLTPAVFFAGVAAGIAITYLLK	WP_138498533_4	2.00E-05
76	WP_066383651	#2e86c1	Anabaena	none	none	cc1	Anabaena sp. 4-3	3183	5	41.53	yes	MAFIAVNELRATGSELFQDAESFLNELNNLDDSVHGGNYSKTTNGVLDLAEKGFEFGVITFGIDAIGHLAKSFSDAGNGYY	WP_066383651_5	none
78	WP_096536886	#2e86c1	Nostoc	none	none	cc1	Nostoc linckia NIES-25	3307	5	28.48	yes	MANITLSELYVSGSELFEGTESFLNDLGDAESISGGNYANFSDISSLTKLAEAYVDTYAIGHVTFVAKSYSHGTYY	WP_096536886_5	none
80	WP_015212417	#2e86c1	Anabaena	Peptidase family M41	PF01434.18	cc1	Anabaena cylindrica PCC 7122	2291	1	36.68	yes	MASIKLSELQATGSELFQDSESFLNEMSDVNSIYGGSYGGEVSDISTLTKLAEAFVNVYGIGHIAYLAKSYSDKGYGY	WP_015212417_1	8.30E-06
82	WP_006195640	#2e86c1	Nodularia	none	none	cc1	Nodularia spumigena UHCC 0039	3084	4	39.89	yes	MANIKLSELHAAGSELFHDSESFLNEFSDVDSISGGQVTIATGATYVASNASTLTKLAEAFVITYAVEHVTILAKSFSITGVY	WP_006195640_4	none
84	WP_099071810	#2e86c1	Nostoc	none	none	cc1	Nostoc linckia z15	1714	2	34.94	yes	MANITLSELYVSGSELFAGTESFLNDLSDADSISGGDQWSGFSDISTLTKLAEAYVDTYAIGHIAFIAKSYSSSAVG	WP_099071810_2	none
86	WP_015113151	#2e86c1	Nostoc	none	none	cc1	Nostoc sp. PCC 7107	2746	1	38.87	yes	MANITLSELNAAGSQLFQGSESFLNDLSDVDAIAGGSGYGYGYDGFGFNKLIEGFVDVYAIQHVYGIAKSFSKGGYGVSGY	WP_015113151_1	none
88	WP_096559014	#2e86c1	Nostoc	none	none	cc1	Nostoc sp. NIES-4103	3893	5	29.36	yes	MANITLSELHIAGSELFQDSESFLNELNNVDSISGGSYGSHVSDISTLTKLAEAFVNVYGIGHIAYLAKSFSHSDSYSGY	WP_096559014_5	none
90	BAZ29283	#2e86c1	Cylindrospermum	none	none	cc1	Cylindrospermum sp. NIES-4074	1757	1	36.04	yes	MASIKLSELQVAGSELFQDSESFINDLSDATSLSINGGDANFQDYGDFGVKYLEYLILGYGVDAIKYIVKSFSDVNY	BAZ29283_1	none
92	WP_096730381	#2e86c1	Nostoc	none	none	cc1	Nostoc carneum NIES-2107	2000	2	45.94	yes	MANIKVSELSPAGSELFQDSESFLNDLNDMDTTSVHGGEGANYVPYLQFGSKLLEYSVVGLGITTIASLVGTFSSTGNGVGGGIGGGTTI	WP_096730381_2	none
94	WP_073639381	#2e86c1	Nostoc	none	none	cc1	Nostoc calcicola FACHB-389	1988	1	32.63	yes	MGNTKNSALNPTGSELFMDSESFLQDLADTDAMNVQGGEGPPINKLLEFGVTVYALNNVVSLAKSFSKYSKA	WP_073639381_1	none
96	WP_162399505	#2e86c1	Nostoc	tRNA synthetases class II (A)	PF01411.19	cc1	Nostoc sp. B(2019)	1472	5	19.08	yes	MATIEISDLHTADSETFLTNLNDVDSIYGGEEYAFAQTLNFGMKILEAAIAIFAISSITWIAKSFNAEKFML	WP_162399505_5	4.00E-06
98	WP_026100063	#2e86c1	Fortiea	none	none	cc1	Fortiea contorta PCC 7126	2289	2	48.31	yes	MAFIAVNELRATGAELFQDSESYLTELNNLDAVHGGIDAGATASAGATATILGLVTKGYEFGVYTVGIEGISKLVKSFSYGGGYSGAV	WP_026100063_2	none
100	CEJ45116	#2e86c1	Chrysosporum	none	none	cc1	Chrysosporum ovalisporum	2739	2	40.75	yes	MANITLSQLHPAGSELFQDAESFLNELSNIDSISGGQIVGTAATGTIATQAAVSNPFTLTKLAEAYVYVYAIEHVTFLAKSFSLVL	CEJ45116_2	none
102	WP_062295185	#2e86c1	Nostoc	none	none	cc1	Nostoc piscinale CENA21	3337	1	42.23	yes	MANITLSELNAAGSQLFQDSESFLNDLSDVDAIAGGSGYGYGYGYDGFGLNKLIEGFVDVYAIQHVYGIAKSFSHGGYGVSAY	WP_062295185_1	none
104	WP_087539234	#2e86c1	Nostocales	none	none	cc1	Nostocales cyanobacterium HT-58-2	2551	4	39.13	yes	MAHIKVLELRPAGSELFIDSETYLNDLSDVDTTSVHGGFGHGFTAFTAVNFKVLEAGAMGLGITNVVSLVKSFSGGASTGGY	WP_087539234_4	none
106	WP_015210601	#2e86c1	Cylindrospermum	none	none	cc1	Cylindrospermum stagnale PCC 7417	1601	6	13.09	yes	MAKITISALHPADSETFIYDLKDIDSQSIFGGRDDVFSPALDFGAKFFEFVISIYAIDTISLLAKSFNTTK	WP_015210601_6	none
108	CEJ45116	#2e86c1	Chrysosporum	none	none	cc1	Chrysosporum ovalisporum	2320	5	26.57	yes	MANIILSQLHHAGSELFHDSEGFLHQLSDVDPISGGQATVATATTNALSNLAILFQILDAYTLVDAMDQVTLLAKSFSINIY	CEJ45116_5	none
110	WP_099071810	#2e86c1	Nostoc	none	none	cc1	Nostoc linckia z15	2082	1	38.15	yes	MANITLSELYVSGSDLFAGTESFLNDLSDADAISGGNYAGFSDISTLTKLAEAYVDTYAIGHVTFVAKSYSNGTYY	WP_099071810_1	none
112	WP_009343975	#2e86c1	Cylindrospermopsis	D-isomer specific 2-hydroxyacid dehydrogenase, catalytic domain	PF00389.30	cc1	Cylindrospermopsis raciborskii CENA303	1864	1	42.6	yes	MASIKLGQLETTGSELFQDSESFLNEMSDVNSISVYGGGSDFGDISVFTKLGEAFVNTYGIGNIAYLAKSYSDHDYYW	WP_009343975_1	9.70E-06
114	TAE59458	#2e86c1	Nostocales	none	none	cc1	Nostocales cyanobacterium	1974	3	36.02	yes	MANIKLHELSVAGSELFQDSESFLNEMNDSDGILVQGGSGSYLTELLDYSIKGKEFALLGFAIDSAVSLAKSFSSHGDW	TAE59458_3	none
116	WP_016950446	#2e86c1	Anabaena	none	none	cc1	Anabaena sp. PCC 7108	2026	1	38.8	yes	MANIQLSELQATGSELFQDSESFLNEMSDVNSIFGGGYHGGYVSDVSTLTKLAEAFVNVYAVGHIAYLAKSYSHSNGYSNGYGY	WP_016950446_1	none
118	WP_087539234	#2e86c1	Nostocales	none	none	cc1	Nostocales cyanobacterium HT-58-2	2212	7	31.3	yes	MAHIKVSELRPAGSELFIDSESYLNDLSDMDTTFVHGGFGHGLMEFTAVNFKVLEAGAIGLGITNVVSLVKSFSTFINQGPG	WP_087539234_7	none
120	WP_096559014	#2e86c1	Nostoc	none	none	cc1	Nostoc sp. NIES-4103	3129	4	30.94	yes	MANITLSELHIAGSELFQDSESFLNELNNVDSISGGSYGSHVSDISTLTKLAEAFVNVYGIGHIAYLAKSFSHSDSYSGY	WP_096559014_4	none
122	WP_013190203	#2e86c1	Trichormus	none	none	cc1	Trichormus Nostoc azollae 0708	1663	1	38.14	yes	MASIKLSQLQATGSELFQDSESFLNEMSDVSSIYGGGYDNDVSDISTLEKLAEAFVNVYGIGHIAYLAKSYSYSNGY	WP_013190203_1	none
124	WP_106240815	#2e86c1	Pleurocapsa	plantaricin: plantaricin C family lantibiotic	NF000539.0	cc1	Pleurocapsa sp. CCALA 161	2313	2	40.54	yes	MAEIKLSELRPAGSELLQDSENFLNELSDREIENVVGGDTINSVASQNSVSVGTVNTITDVGQTQTFVTF	WP_106240815_2	1.30E-08
126	WP_096575011	#2e86c1	Anabaenopsis	none	none	cc1	Anabaenopsis circularis NIES-21	2000	6	26.84	yes	MANITLSELNVAGSQLFQDSESFLNDLSDVDLSAAHGGKNANSADYGYGSDSYISVFNKLIEGFVGVYAIQHIFSLAKSFSKSNY	WP_096575011_6	none
128	OBQ18754	#2e86c1	Anabaena	none	none	cc1	Anabaena sp. WA113	1604	2	37.95	yes	MATITLSQLNTTGSELFADSESYLNELNDAASVSINGGGSDFSGFSAYGDFGVKYLEFLVDGYAIASIKHIAKSFSNDSHYGH	OBQ18754_2	none
130	WP_015212417	#2e86c1	Anabaena	Peptidase family M41	PF01434.18	cc1	Anabaena cylindrica PCC 7122	2896	2	35.53	yes	MASIKLSELQATGSELFQDSESFLNEMSDVNSIYGGYYGGEVSDISTLTKLAEAFVNVYGIGHIAYLAKSYSDKSYGY	WP_015212417_2	6.80E-06
132	WP_011321056	#2e86c1	Trichormus	none	none	cc1	Trichormus variabilis 0441	3422	1	45.39	yes	MAFIAVKELQVTGAELFQDSESFLNELNNLDNSVHGGGDYSNTTNGVLDLAAKGFEFGVITYGIDAIGHLAKSYSDAGYY	WP_011321056_1	none
134	WP_069073064	#2e86c1	Nostoc	none	none	cc1	Nostoc sp. KVJ20	3171	6	29.38	yes	MANITLSELQVGSALFQDSESFLTDLNDMNAVYGGEGYGFDELLDYGAKGFEFSILGLGVNNVVSLAKSLSEAD	WP_069073064_6	none
136	RCJ30949	#2e86c1	Nostoc	none	none	cc1	Nostoc minutum NIES-26	2134	2	33.45	yes	MATINLFELHAAGSELFQDSESFLNELSDVDSISGGSESLSNVSDLSGLTKLAEAYVLTYGVGHIAVLVTSYSHDYTV	RCJ30949_2	none
138	WP_071189061	#2e86c1	Trichormus	none	none	cc1	Trichormus sp. NMC-1	2017	3	28.53	yes	MASIKLSELQATGSELFQDSESFLNEMSDVNSIYGGYYDSGASDISTFTKLAEAFVNVYAIGHIAYLAKSYSDSKY	WP_071189061_3	none
140	WP_069073064	#2e86c1	Nostoc	none	none	cc1	Nostoc sp. KVJ20	2366	1	36.33	yes	MATITLSELYLSGSELFQDSESFLNDLSDANSTSVYGGHGAGFDPLLDYGIKGYEFALLGLGINNVVSLAKSFSGTSIASANSTCG	WP_069073064_1	none
142	CEJ45116	#2e86c1	Chrysosporum	none	none	cc1	Chrysosporum ovalisporum	3154	1	40.75	yes	MANITLSQLHPAGSELFQDAESFLNELSNIDSISGGQIVGTAATGTIATQAAVSNPFTLTKLAEAYVYVYAIEHVTFLAKSFSLVL	CEJ45116_1	none
144	OBQ01900	#2e86c1	Anabaena	none	none	cc1	Anabaena sp. AL09	595	3	20.42	yes	MANIVISELRSAGSELFQDSETFMNDLTEEDMINTLGGQKSWSTRVCQAVQVLFTADSI	OBQ01900_3	none
146	WP_096536886	#2e86c1	Nostoc	none	none	cc1	Nostoc linckia NIES-25	2505	1	35.79	yes	MANITLSELYVSGSELFEGSESFLNDLGDADSISGGNYNGFSDISTLTKLAEAYVDTYAIGHVTFVAKSYSHGTYY	WP_096536886_1	none
148	TVP62740	#2e86c1	Nodularia	none	none	cc1	Nodularia sp. (in: Bacteria)	2536	1	37.79	yes	MANIKLSQLHAAGSELFNDSESFLNELSDVDSISGGQIGYATGVSNPITLTKLAEAFVTVYAIEHVTILAKSFSLGFVY	TVP62740_1	none
150	BAZ29283	#2e86c1	Cylindrospermum	none	none	cc1	Cylindrospermum sp. NIES-4074	2775	4	28.3	yes	MASIKLSELQVAGSELFQDSESFINDLSDATSLSINGGDGSSSFGDYGDFGVKYLEYLVLGYGVDAIKYIVKSFSDV	BAZ29283_4	none
152	WP_096575011	#2e86c1	Anabaenopsis	none	none	cc1	Anabaenopsis circularis NIES-21	2782	3	33.49	yes	MANITLSELNAAGSQFFQDSESFLNDLSDVDAIAAHGADSNSNSYVSDFYGFNKLIEGFVDVYAIQHIYGIAKSFSHGGYGISAA	WP_096575011_3	none
154	WP_168496018	#2e86c1	Anabaena	none	none	cc1	Anabaena sp. UHCC 0204	1663	1	42.46	yes	MASIKLSQLHANGSELFQDSESFLNEMNDVDTISVQGGSGSGIYDLVQYSIKGKEFVLLGFAIDNVVSLAKSFSYDSHGAGYGYY	WP_168496018_1	none
156	RCJ30949	#2e86c1	Nostoc	Inositol phosphatase	PF12456.8	cc1	Nostoc minutum NIES-26	2928	4	30.88	yes	MATINLSELHAAGSELFQDSESFLNELSDVDSISGGSYATESVSDLSGLTKLAEAFVLTYGVGHIVVLTKSYSNNY	RCJ30949_4	1.00E-05
158	WP_087539234	#2e86c1	Nostocales	none	none	cc1	Nostocales cyanobacterium HT-58-2	2883	1	47.55	yes	MAHIKVSELRPAGSELFIDSESYLNDLSDVDATSVHGGFGHGFGVFTAVNFKVLEAGAVGLGITNVVSLVKSFSGGGESTASFGGVGIANDIGINANPKGANIVIG	WP_087539234_1	none
160	WP_096728455	#2e86c1	Nostoc	none	none	cc1	Nostoc carneum NIES-2107	3641	2	17.46	yes	MANIKVNELLHLSLTGSELFNDSESFLTELSDETEQMGVIGGACNCCWFTSWSKYCKTV	WP_096728455_2	none
162	WP_168645325	#2e86c1	Dolichospermum	none	none	cc1	Dolichospermum sp. UHCC 0259	1675	1	39.86	yes	MASITLSQLNVTGSELFQDSESYLNDLNDAASVSINGGGSGFSDFGVYGDFGVKYLEFLVDGYAIASIKHIAKSFSGDSYRGY	WP_168645325_1	none
164	WP_096681247	#2e86c1	Nostoc	none	none	cc1	Nostoc sp. NIES-2111	3306	5	47.59	yes	MAFIAVKELQNTGAELFQDSESFLSELNNVDATAVHGGGDGYSSATNGVLDFGLKGFEFGAITFGIDAIGHLVKSFSSNGTYR	WP_096681247_5	none
166	WP_069073064	#2e86c1	Nostoc	none	none	cc1	Nostoc sp. KVJ20	3556	5	30.13	yes	MANITLSELQVGSVLFQDSESFLTDLNDMNAVYGGEGYGFDPFLEYGAKGFEFSILGLGVNNVVSLAKSFSEDV	WP_069073064_5	none
168	RCJ14929	#2e86c1	Nostoc	none	none	cc1	Nostoc sp. ATCC 43529	2643	3	32.93	yes	MANITLSELYISGSELFEGTESFLNDLSDADSISGGEYANFSDISTLTKLAEAYVNTYAIGHITYVAKSYSHGGY	RCJ14929_3	none
170	WP_089091039	#2e86c1	Nodularia	none	none	cc1	Nodularia sp. NIES-3585	3307	2	37.47	yes	MANITLSELHAAGSELFNDSESFLNEFSDVDSISGGGIGGYAGGVSDPATLMKLAEAFVTVYAIGHVTVLAKSFSASQA	WP_089091039_2	none
172	WP_011321056	#2e86c1	Trichormus	none	none	cc1	Trichormus variabilis 0441	3040	5	40.34	yes	MAFIAVKELQVTGAELFQDSESFLNELNNLDNSVHGGGDYSNTTNGVLDLAAKGFEFGVITYGIDAIGHLAKSFSSAA	WP_011321056_5	none
174	BAZ29283	#2e86c1	Cylindrospermum	none	none	cc1	Cylindrospermum sp. NIES-4074	2048	3	28.67	yes	MASIKLSELQVAGSELFQDSESFINDLSDATSLSINGGDGNSSSFGDYGDFGVKYLEYLVLGYGVDAIKYIVKSFSDVH	BAZ29283_3	none
176	WP_162399505	#2e86c1	Nostoc	none	none	cc1	Nostoc sp. B(2019)	2545	4	27.59	yes	MATITLSELRNAGSQLFQDSESFLNDLSDVDAISGGYDNFSDFHGFDKIXXXXXXXXXXXXXXXXXXXXXXXXXXXXXXXXXXTL	WP_162399505_4	none
178	OBQ36138	#2e86c1	Anabaena	none	none	cc1	Anabaena sp. CRKS33	1705	1	35.3	yes	MASITLSQLNVTGSELFQDSESYLDDLNDASSVAVHGGGSNYSGFGEYGDFGVKYLEYLVGGYAIASIKSIAQSFSHSDSASRHW	OBQ36138_1	none
180	WP_096569967	#2e86c1	Sphaerospermopsis	none	none	cc1	Sphaerospermopsis kisseleviana NIES-73	2687	3	45.21	yes	MASIKLSELQVAGSELFQDSESFLNEMSDANSVYGGGNDYVSDMSTLTKLAEAFVNTYGIGHIAYLAKSYSEKWY	WP_096569967_3	none
182	WP_096569967	#2e86c1	Sphaerospermopsis	none	none	cc1	Sphaerospermopsis kisseleviana NIES-73	2974	5	40.46	yes	MASIKLSELQVAGSELFQDSESFLNEMSDVNSISVYGGYSSTVSDMSTLTKLAEAFVNTYGIGHIAYLAKSYSEKWY	WP_096569967_5	none
184	TVP62740	#2e86c1	Nodularia	none	none	cc1	Nodularia sp. (in: Bacteria)	3295	6	16.19	yes	ELSDVDSISGGQIGYATGVSNPITLTKLAEAFVTVYAIEHVTILAKSFSLGFVY	TVP62740_6	none
186	WP_096681247	#2e86c1	Nostoc	none	none	cc1	Nostoc sp. NIES-2111	2932	2	50.24	yes	MAFIAVKELQNTGAELFQDSESFLSELNNVDTTAVHGGGDGYSSATNGVLDFGLKGFEFGAITFGVDAIGHLVKSFSDNGGWY	WP_096681247_2	none
188	WP_044449859	#2e86c1	Mastigocladus	none	none	cc1	Mastigocladus laminosus UU774	1915	1	35.6	yes	MANIKVSELSSAGYELFMDSESFLQDLADTDVMSVHGGQGDGFQKYLEYGVVGLGINNIASLAKSFTAA	WP_044449859_1	none
190	WP_096569967	#2e86c1	Sphaerospermopsis	none	none	cc1	Sphaerospermopsis kisseleviana NIES-73	2397	4	42.53	yes	MASIKLSELQVAGSELFQDSESFLNEMSDANSVYGGGNDYVSDMSTLTKLAEAFVNTYGIGHIGYLAKSYSDKGYW	WP_096569967_4	none
192	WP_006195640	#2e86c1	Nodularia	none	none	cc1	Nodularia spumigena UHCC 0039	3480	2	43.82	yes	MANIKLSELHAAGSELFHDSESFLNEFSDVDSISGGQVTIATGTVATGATYVASNASTLTKLAEAFVITYAVEHVTIVAKSFSITGVY	WP_006195640_2	none
194	WP_168465654	#2e86c1	Aphanizomenon	none	none	cc1	Aphanizomenon sp. UHCC 0183	1640	1	40.64	yes	MATITLSQLNTTGSELFADSESYLNELNDAASVSINGGGSDFSGFSAYGDFGVKYLEFLVDGYAIASIKHIAKSFSNDSHSGGYGH	WP_168465654_1	none
196	WP_073644071	#2e86c1	Nostoc	none	none	cc1	Nostoc calcicola FACHB-389	2355	5	28.95	yes	MANITLSELYVSGSELFEGAESFLNDLSDVDSISGGNSSNFSDMSSLTKLAEAYVDTYAIGHITFIAKSFSQSKG	WP_073644071_5	none
198	WP_096559014	#2e86c1	Nostoc	none	none	cc1	Nostoc sp. NIES-4103	2729	8	24.24	yes	MANITLTELHTTGSELFQDSESFLNELNNLDSISGGDYSSGVSDFSTIIKLAEAFVDVYAINHIAWIAKSFSHSNDTHY	WP_096559014_8	none
200	WP_071189061	#2e86c1	Trichormus	none	none	cc1	Trichormus sp. NMC-1	1733	2	30.93	yes	MASIKLSELQATGSELFQDSESFLNEMSDVNSIYGGYYDSDVSDVSTLTKLAEAFVNVYGIGHIAYLAKSYSDSKY	WP_071189061_2	none
202	WP_006195640	#2e86c1	Nodularia	none	none	cc1	Nodularia spumigena UHCC 0039	4722	7	36.66	yes	MANITLSELHVAGSELFNDSESFLNEFSDVDSISGGQVGYAGGVSDPTTLMKLAEAFVTVYAIGHVTVLAKSFSASNV	WP_006195640_7	none
204	WP_066383651	#2e86c1	Anabaena	none	none	cc1	Anabaena sp. 4-3	2396	2	47.82	yes	MAFIAVNELRATGSELFQDAESFLNELNNLDDSVHGGSSGYSGATNGVLDLAVKGFEFGVITYGIDAIGHLAKSFSDASTGW	WP_066383651_2	none
206	WP_089091039	#2e86c1	Nodularia	none	none	cc1	Nodularia sp. NIES-3585	3721	3	33.61	yes	MANIKLSELNAIGSELFLDSESFLNELNDVDSISGGSTSSQGYDQGYGYEGISGISTLTKLAEAFVTVYAIGHVTELAKSFSHGY	WP_089091039_3	none
208	WP_015155263	#2e86c1	Cyanosarcina	none	none	cc1	Cyanosarcina cf. burmensis CCALA 770	2267	3	29.16	yes	MANITISELRPAGFDLFQDSESFLNDLTDTDSMSVLGGSENGFNDSQYAYHAIVDIAVIHHLSFIAELVGSLASNVGGGGGNGGGK	WP_015155263_3	none
210	WP_026100063	#2e86c1	Fortiea	none	none	cc1	Fortiea contorta PCC 7126	1887	6	43.93	yes	MASITVNELHTTGVELFQDSESYLTELNNLDAVHGGTDPAANSEYNGVTATVFSLIEKGYEFGIYTLGIDAIAAIIKSFSQPAAK	WP_026100063_6	none
212	WP_096575011	#2e86c1	Anabaenopsis	none	none	cc1	Anabaenopsis circularis NIES-21	3516	2	39.37	yes	MANIILSELNAAGSQLFQGSESFLNDLSDVDAIASGSGYGGYGYDGFGLNKLIEGFVDVYAIQHVYGIAKSFSHGGYGVSGY	WP_096575011_2	none
214	RCJ30949	#2e86c1	Nostoc	Inositol phosphatase	PF12456.8	cc1	Nostoc minutum NIES-26	3300	5	29.77	yes	MATINLSELHAAGSELFQDSESFLNELSDVDSISGGSYATESVSDLSGLTKLAEAFVLTYGVGHIVVLTKSYSNNY	RCJ30949_5	1.00E-05
216	WP_099071810	#2e86c1	Nostoc	none	none	cc1	Nostoc linckia z15	2830	6	18.96	yes	MANITLSELYVSGSDLFVGTESFLNDLNDADSISGGNYYNFSDISTLTKLAEAYVDTYAIGHVTFVAKSYSNGTYY	WP_099071810_6	none
218	WP_066383651	#2e86c1	Anabaena	none	none	cc1	Anabaena sp. 4-3	2011	4	43.66	yes	MAFIAVNELRATGSELFQDAESFLSELNNLDDSVHGGNYSKTTNGVLDLAEKGFEFGVITFGIDAIGHLARSFSDASNGY	WP_066383651_4	none
221	WP_096730381	#2e86c1	Nostoc	none	none	cc1	Nostoc carneum NIES-2107	2434	1	48.81	yes	MANIKVSELSPAGSELFQDSESFLNDLNDMDTTSVHGGEGANYVPYLQFGSKLLEYSVVGLGISTITSLVGSFSSTGTGVGGGVGTDNGVGGGTITF	WP_096730381_1	none
223	WP_096569967	#2e86c1	Sphaerospermopsis	none	none	cc1	Sphaerospermopsis kisseleviana NIES-73	1367	6	36.43	yes	MARIIIADLHPIDSEVFINEVNNQEYQAVFGGVDGSSYQILNFGVKTLEFMLVIAAIDAISFLTTSFINKDYELTDRDFLLESMYNIQE	WP_096569967_6	none
224	OBQ36138	#2e86c1	Anabaena	none	none	cc1	Anabaena sp. CRKS33	1248	3	17.43	yes	MATIRIYDLPISQEIEFIKDLNNKELSSSFGGGDNDMNQIFYYGVKGLEFMLAIFAIDSILFLTNKVRNFL	OBQ36138_3	none
226	WP_114082527	#2e86c1	Nostoc	none	none	cc1	Nostoc sp. ATCC 53789	1458	7	23.57	yes	MSRITISDLHTDDSEGLLIDISNIDYISIYAGADDDLTQILNYGLKNLQFALLAFTIHEIADLAKSFNTQ	WP_114082527_7	none
228	WP_015078657	#2e86c1	Anabaena	Galactose oxidase, central domain	PF13418.6	cc1	Anabaena sp. 90	1274	10	24.96	yes	MANIRISNLENTDEKKFIINLSNLDAVYVFGGEYNNASQILNYGVKALEFVLVIYAIDAISLLTKTFRK	WP_015078657_10	1.10E-05
230	WP_137906310	#2e86c1	Dolichospermum	none	none	cc1	Dolichospermum planctonicum	1248	5	19.15	yes	MASIRIYDLHNSQEIKFINDLNNMELLSLFGGEDNDVNQIFYYGVKGLEFMLAVYAIESILFLTNKVRNFL	WP_137906310_5	none
232	WP_096664869	#2e86c1	Dolichospermum	none	none	cc1	Dolichospermum compactum NIES-806	1274	5	29.72	yes	MANVTISDLHNAHGKKFIINLDDMDSISIFGGEYNDVHQILNYGVKALEFVLAIYAIDTISLLTRAFKK	WP_096664869_5	none
234	WP_168496018	#2e86c1	Anabaena	none	none	cc1	Anabaena sp. UHCC 0204	1243	3	18.6	yes	MARITISDLHITQEKLLINEISNLESVSIFGGDSNNFQELVRFGIKSMEFILLAYAIDSISYLGSSFNNKD	WP_168496018_3	none
236	OBQ18150	#2e86c1	Aphanizomenon	none	none	cc1	Aphanizomenon flos-aquae LD13	1256	1	9.12	yes	MARITISDINVSKKKVLLEEINNPESVYIFGGSSNNFRELVKFGIKSMEFILLAYAIDSISYLGSSFNSNY	OBQ18150_1	none
238	WP_057178590	#2e86c1	Cylindrospermopsis	none	none	cc1	Cylindrospermopsis raciborskii GIHE 2018	1243	8	21.0	yes	MAKIMINDLEPINSETFINDLNNQNSQAIFGGEDPYFDGLINFGIKTLEFMVVITAINAISFLVYSFQE	WP_057178590_8	none
240	BAZ29283	#2e86c1	Cylindrospermum	none	none	cc1	Cylindrospermum sp. NIES-4074	1363	7	10.97	yes	MAKISISDLYPTESETYISNLTNIEVLAVFGGDSNNYPQFLYFGFKFLHFVATMYAIDAISFLVSSFNTNDNI	BAZ29283_7	none
242	WP_148763415	#2e86c1	Dolichospermum	none	none	cc1	Dolichospermum sp. UHCC 0315A	1275	5	27.78	yes	MANIRISNLENTDEKKFIINLSNLDAVSVFGGEYNNASQILNYGVKALEFVLVIYAIDAISLLTKTFRK	WP_148763415_5	none
244	WP_071189061	#2e86c1	Trichormus	none	none	cc1	Trichormus sp. NMC-1	1363	4	27.08	yes	MARIIIADLHPLDSEVFLNELTSLDSQSVFGGQDNYRPQIAEVGVKALEFILVIAAIDAISFLTTSFINKD	WP_071189061_4	none
246	WP_009343975	#2e86c1	Cylindrospermopsis	none	none	cc1	Cylindrospermopsis raciborskii CENA303	1246	4	16.98	yes	MAKIIINDLAPINSETFINDLNNHNSQAVFGGENPYFDGLFNFGIKTLEFMVVITAINAISFLAYSFRE	WP_009343975_4	none
248	WP_168465654	#2e86c1	Aphanizomenon	none	none	cc1	Aphanizomenon sp. UHCC 0183	1274	4	27.78	yes	MANIRISNLENTDEKKFIINLSNLDAVSVFGGEYNNANQILNYGIKALEFVLVIYAIDAISLLTKTFRK	WP_168465654_4	none
250	WP_168501874	#2e86c1	Anabaena	Domain of unknown function (DUF3447)	PF11929.8	cc1	Anabaena sp. UHCC 0187	1254	4	13.98	yes	MARIIISDLTISEKLLIHEISNMESVSIFGGNSSNFNELVKFGIKSMEFILLAYAIDSISYLATSFNKHN	WP_168501874_4	1.60E-06
252	WP_168645325	#2e86c1	Dolichospermum	none	none	cc1	Dolichospermum sp. UHCC 0259	1273	4	31.22	yes	MANVTISDLHNAHEKKFIINLDDMDSISIFGGEYNDVHQILNYGVKALEFVVAIYAIDTISLLTRAFKK	WP_168645325_4	none
255	WP_013190203	#2e86c1	Trichormus	Exported protein precursor (EppA/BapA)	PF07268.11	cc1	Trichormus Nostoc azollae 0708	1284	4	20.46	yes	MTRIIIADLHLIDSEVFINEITSTDEQSVFGGRYEYRPQILEVGVKALEFIVMLAAIDAISFLTTSFIRTD	WP_013190203_4	5.70E-06
257	WP_027402982	#2e86c1	Aphanizomenon	none	none	cc1	Aphanizomenon flos-aquae NIES-81	1256	8	11.03	yes	MARITISDLNTTQEKLLIHEISSIESVYIVGGNRGNFHELVKFGIKSMEFILLAYAIDSISYLGSSFNGNY	WP_027402982_8	none
259	WP_038089561	#2e86c1	Tolypothrix	none	none	cc1	Tolypothrix bouteillei VB521301	1344	4	30.75	yes	MAKIIISDLRPADSEDSESFLHEITDIESTIVQGGVDYGLSQFLNFGVKTLEYALIGFAIYNIVSLVKLFMTSPRHRF	WP_038089561_4	none
261	OBQ18754	#2e86c1	Anabaena	none	none	cc1	Anabaena sp. WA113	1239	3	26.15	yes	MANIIISDLDNADEKKFIFNLNNLDKASIFGGGYNDVNQILNYGIKALEFVLVIYAIDSISFLTKTFKK	OBQ18754_3	none
263	WP_168357543	#2e86c1	Dolichospermum	none	none	cc1	Dolichospermum planctonicum UHCC 0167	1263	5	19.0	yes	MASIRIYDLHNSEEIKFINDLNNMELISLFGGENNDVNKILYYGVKGLEFMLAIYAIDSILFLTNKARNLS	WP_168357543_5	none
265	WP_011610106	#2e86c1	Trichodesmium	none	none	cc1	Trichodesmium erythraeum IMS101	803	2	18.11	yes	MANINISDLSPAGADLFLDSESYLNDLTEGEMTNTLGGKGSFTFCGKRISWSICWGY	WP_011610106_2	none
267	WP_124155194	#2e86c1	Okeania	none	none	cc1	Okeania hirsuta	1888	2	16.0	yes	MANINISDLHPTGADLFLDSESYLHDLNEQEMTNTLGGWYVHLIRTTICFGS	WP_124155194_2	none
269	WP_124970176	#2e86c1	Aphanothece	none	none	cc1	Aphanothece sacrum FPU1	2174	6	26.5	no	MAQIKINDISLAGSDLFSDSESYLTELSHDSEMLNIQGGTSVRLTTSIRTTLFTTYPIPAPTLPIVQAA	WP_124970176_6	none
271	WP_015216084	#2e86c1	Anabaena	none	none	cc1	Anabaena cylindrica PCC 7122	2238	5	31.44	yes	MASIKISDLRPSGLDLFVDSESFLNDLNDSDLATTNGGATPTTVTLLGAAWLGYSIGKELARFF	WP_015216084_5	none
273	WP_167725682	#2e86c1	Tolypothrix	none	none	cc1	Tolypothrix sp. PCC 7910	1885	2	46.98	yes	MANIKVSELSPAGSELFQDSESFLNDLNDMDTTSVHGGEGANYVPYLQFGSKLLEYSVVGLGITTIASLVGTFSSTGTGVGGGTGGGTSGGNTI	WP_167725682_2	none
275	WP_073591536	#2e86c1	Phormidium	none	none	cc1	Phormidium ambiguum IAM M-71	2925	1	33.87	no	MSTIKISDISPVGYDLFSDSESYMMALSEDEFSDIGGAGSPSALTIVTTWACIGGAALVAVSGLAASYAVGRWG	WP_073591536_1	none
277	WP_006619051	#2e86c1	Arthrospira	none	none	cc1	Arthrospira platensis YZ	1096	7	18.83	yes	MNFKVAKTIVIVRELGNNKSHRERQIINLITSKSNLFKEETKMANITISDLRPTGADLFSDSESYLTDLNDQEMMWLLGQGRYRGFSYQRFDGGLSIFYCKWS	WP_006619051_7	none
279	WP_087542717	#2e86c1	Nostocales	plantaricin: plantaricin C family lantibiotic	NF000539.0	cc1	Nostocales cyanobacterium HT-58-2	2507	3	38.49	yes	MAIIKISELRPAGSELFQDSESFLNELTEQETVGLEGGFAFNGTLGISISAQTVNGNTINANTAGNINTAVIA	WP_087542717_3	9.30E-06
281	WP_163927072	#2e86c1	Nostoc	none	none	cc1	Nostoc sp. UIC 10630	1610	1	45.4	yes	MATINISDLHPAGSDLFSDSEGYMNDLGDNEFDSIYGGLLPALLFSVGKLVAQRSSAVCAKKAAQGIAVVSGAVSSWIASPDF	WP_163927072_1	none
284	WP_106218514	#2e86c1	Cyanosarcina	none	none	cc1	Cyanosarcina cf. burmensis CCALA 770	1517	1	41.04	yes	MANITIANLQPAGLDLFYDSDNYMKDLTEAELGIQGGGFRTWLSYLGSLAWDLAKTFVSPEDRAEISKDLEGLIPS	WP_106218514_1	none
286	AVH79535	#2e86c1	Synechocystis	none	none	cc1	Synechocystis sp. PCC 9413	10	6	23.24	yes	MMPTISITDLKPKGSDLFQDSETYLRDISADEEIGISGGTLTSTVPCGVAISISVITYIVTRKIQEEGEKEIE	AVH79535_6	none
288	WP_012597836	#2e86c1	Gloeothece	none	none	cc1	Gloeothece citriformis PCC 7424	762	5	27.11	yes	MSNISITDINPSGSSLFADVESYLNDLSEQDINDILGAGRVTIAWTLIDIQW	WP_012597836_5	none
290	WP_015216084	#2e86c1	Anabaena	none	none	cc1	Anabaena cylindrica PCC 7122	1656	10	22.61	yes	MSSIKISDLRPAGFDLFVDSESFLNESFLNDLSDSDLAITHGGSTPTTVLLIGAGWLGYNVGKELARFF	WP_015216084_10	none
292	WP_096580419	#2e86c1	Aulosira	Protein of unknown function (DUF295)	PF03478.18	cc1	Aulosira laxa NIES-50	2682	1	38.71	yes	MASIKISELRPAGSELFQDSESFLNDLNSQEMEIIGGRILFISRAGSVAISISAQTVVGNTVNANTFGNLNTVAV	WP_096580419_1	1.80E-06
294	WP_012597836	#2e86c1	Gloeothece	none	none	cc1	Gloeothece citriformis PCC 7424	1223	4	28.7	yes	MSNISITDINPSGSSLFADVESYLNDLSEQDINDILGAGRVTIAWTLIDIQW	WP_012597836_4	none
296	WP_109013279	#2e86c1	Nostoc	plantaricin: plantaricin C family lantibiotic	NF000539.0	cc1	Nostoc commune NIES-4072	1399	1	37.55	yes	MATINISDLRPTGSDLFSDSESYMSELGDNELVKVNGGSTLICFRIGYAAARSSQQCAAGIAGAAGAVKRWWDNRK	WP_109013279_1	2.30E-05
298	WP_017721129	#2e86c1	Oscillatoria	plantaricin: plantaricin C family lantibiotic	NF000539.0	cc1	Oscillatoria sp. PCC 10802	1582	1	24.1	yes	MANITISDLRPAGSDLFADSESFMQELTEQEIGGVLGGDKIKIKTVVININIGILTIACPIGS	WP_017721129_1	1.40E-06
300	WP_086769105	#2e86c1	Nostoc	Type-A lantibiotic	PF04604.13	cc1	Nostoc sp. 106C	2952	4	32.88	yes	MAVIKISELRPAGSELFQDSESFLNELSESREVDQVLGGLNTIFTVNANTVNANTVTNVNTIRSIVISA	WP_086769105_4	1.10E-06
302	WP_070396036	#2e86c1	Moorea	Tapetum specific protein TAP35/TAP44	PF07265.11	cc1	Moorea producens PAL-8-15-08-1	2416	3	10.1	no	MSNIKISELRSAGSELFYDSESFLNELTDEQEIDSVLGGFRIHPFSKRTIPFPIKTFPIKTFPIHPFPICFPRTIRTRRPRKIH	WP_070396036_3	1.30E-05
304	WP_127086205	#2e86c1	Calothrix	plantaricin: plantaricin C family lantibiotic	NF000539.0	cc1	Calothrix desertica PCC 7102	1790	3	27.2	yes	MATISISNLRATGADLFADSESYLSELTDAELNETKGGSIIAAAAVYAAVVITTAIAERLSR	WP_127086205_3	1.90E-06
306	WP_127086205	#2e86c1	Calothrix	plantaricin: plantaricin C family lantibiotic	NF000539.0	cc1	Calothrix desertica PCC 7102	2479	4	26.48	yes	MATISISNLRNSGAELLMDSESYLNELTETELNITKGGTGNSITITPITITPMTPDLTPRLTKVQ	WP_127086205_4	1.10E-05
308	WP_168643398	#2e86c1	Dolichospermum	none	none	cc1	Dolichospermum sp. UHCC 0259	2395	4	35.14	yes	MATIKISDLRPVGYDLFSDQESYLTSLTEDELGAQGSAGYTILTTSSGVCVSVGLTVVAVTFAASYIKGRYF	WP_168643398_4	none
310	WP_099068319	#2e86c1	Nostoc	Bacteriocin class II with double-glycine leader peptide	PF10439.9	cc1	Nostoc linckia z15	335	5	27.59	yes	MANIKLHDLSPAGSELFEDSESFLNELNTEELTHVNGGLLSITITITITITVTLAKAA	WP_099068319_5	7.30E-07
313	WP_087542717	#2e86c1	Nostocales	plantaricin: plantaricin C family lantibiotic	NF000539.0	cc1	Nostocales cyanobacterium HT-58-2	3089	2	40.32	yes	MAIIKISELRPAGSELFQDSESFLNELTEQETVGLEGGFAFNGTLGVSISAQTVNGNTVNANTLGNINTAVIA	WP_087542717_2	9.30E-06
315	WP_103138325	#2e86c1	Nostoc	Domain of unknown function (DUF3482)	PF11981.8	cc1	Nostoc sp. CENA543	1839	3	45.49	yes	MASIAINELKFAGADLLVDSESFLNDLEDRELTAAIGGITPVVTFTAASLGSVSVWGVSFGTGFALGTFAGGAVIGYVASR	WP_103138325_3	0.0012
317	WP_124970176	#2e86c1	Aphanothece	none	none	cc1	Aphanothece sacrum FPU1	1768	14	18.36	no	MAQIKINDISLAGSDLFSDSESYLTELSHDSELDNTKGGTGVRIYVFTIRVW	WP_124970176_14	none
319	WP_017748579	#2e86c1	Scytonema	plantaricin: plantaricin C family lantibiotic	NF000539.0	cc1	Scytonema hofmannii PCC 7110	2409	3	29.9	yes	MANIKISELRPAGSELFQDSESFLNELNEREMAGLEGGGYWFVSNGSVGVSITAQTVVGNTVNANTGGNVNTVILL	WP_017748579_3	2.50E-06
321	WP_006197379	#2e86c1	Nodularia	none	none	cc1	Nodularia spumigena CCY9414	943	2	14.21	yes	MANIVISDLRPAGSELFMDSESYLTDLTNDELNHTSGGLFWFGVAVGLAISHLLRNH	WP_006197379_2	none
323	WP_096689510	#2e86c1	Calothrix	none	none	cc1	Calothrix sp. NIES-4071	1841	2	25.48	yes	MNKVVLEDWTMASIKISLLRPAGFDLFEDSESFLNDLSNKETETVVGGAALTEIISYAVAYTYIIDTPAVKNVETQFVQTEVTVSVGVGLQTYSVLSPA	WP_096689510_2	none
325	WP_138499827	#2e86c1	Nostoc	none	none	cc1	Nostoc sp. PA-18-2419	4172	1	32.84	yes	MATIKINNLNVTGYELFNDSESYLNDLTDDEISLTQGGSSLLCYYGIIASMYAARSGIGCVNAANAIVIAGYNYGKNKKWW	WP_138499827_1	none
327	WP_002735885	#2e86c1	Microcystis	none	none	cc1	Microcystis aeruginosa TAIHU98	1406	4	25.51	yes	MANITISDLRPAGADLFSDSESYMHELTDSEMLDTLGGCRVIITWTLFCIEVGVNRIGDFD	WP_002735885_4	none
329	WP_096689510	#2e86c1	Calothrix	plantaricin: plantaricin C family lantibiotic	NF000539.0	cc1	Calothrix sp. NIES-4071	2912	5	17.21	yes	MAFLKISDLRPAGSEFFQDSESYLNELNEQEISATVGGGAVGVISQFSLSIGVSIATLSAISNFG	WP_096689510_5	3.20E-07
331	WP_012595952	#2e86c1	Rippkaea	BlpC_Streptocco: quorum-sensing system pheromone BlpC	NF033215.1	cc1	Rippkaea orientalis PCC 8801	502	5	27.01	yes	MANIAISNLYPAGTDLFVDSESFMAELTDDQLNETHGGAFWFGVAVGLAISHVLR	WP_012595952_5	9.00E-06
333	TRT88208	#2e86c1	Microcystis	none	none	cc1	Microcystis aeruginosa Ma_AC_P_19900807_S299	825	1	32.98	yes	MAKIVVSDLRPAGADLFSDSESFLHDLTETEIDTTQGGITPFIIGVGVGILISARYCKA	TRT88208_1	none
335	WP_138499827	#2e86c1	Nostoc	plantaricin: plantaricin C family lantibiotic	NF000539.0	cc1	Nostoc sp. PA-18-2419	2991	5	16.17	yes	MATIKINNLNASGSDLFNDSESFLNELTEDELNVTKGGSTPFCITIVVSVVVYGKYRGWW	WP_138499827_5	1.10E-05
337	WP_012409787	#2e86c1	Nostoc	none	none	cc1	Nostoc punctiforme PCC 73102	2140	3	39.44	yes	MATIKISDLRPAGYDLFADQESYLMSLTEDELGNQGGAIWTVITTASSGACLSIGLTVVGVTFVASYIKGRYY	WP_012409787_3	none
339	WP_086769105	#2e86c1	Nostoc	Type-A lantibiotic	PF04604.13	cc1	Nostoc sp. 106C	3197	3	36.38	yes	MAVIKISELRPAGSELFQDSESFLNELSESREVDQVLGGLNTIFTVNANTANANTFGNVNTIRSIVISA	WP_086769105_3	9.00E-07
341	WP_006513161	#2e86c1	Leptolyngbya	none	none	cc1	Leptolyngbya sp. PCC 7375	3881	3	17.8	yes	MSVISISELYPVGAKLFSDAESFLGDLNDDALSNINGGETFTTNSIFCTTKPCGEDFSVFLPTTTGRPIVVMKNGVLSFA	WP_006513161_3	none
343	AVH79607	#2e86c1	Nostoc	Domain of unknown function (DUF4183)	PF13799.6	cc1	Nostoc sp. PCC 9205	1421	2	35.35	yes	MASITVSNLNVAGLDLFNDQESYLSEVTDNELGLTHGGITPGSPVIIGTGIKMTVHAGLGFSAGISFTLATRQLRWWR	AVH79607_2	4.50E-06
345	WP_138499827	#2e86c1	Nostoc	CRISPR-Cas9 PI domain	PF18070.1	cc1	Nostoc sp. PA-18-2419	2690	4	19.54	yes	MATIKISDLHPAGSEFFIDSESYLNDLTENEIENLTGAGWYIRFSFNNRGIQVCFSWAWG	WP_138499827_4	2.70E-07
348	WP_086835908	#2e86c1	Nostoc	none	none	cc1	Nostoc sp. RF31YmG	436	1	28.85	yes	MANIVISQLRPAGAELFDGSESFMSDLTDSELDATKGGITPAVFFAGVAVGIAITFKLK	WP_086835908_1	none
351	WP_017314970	#2e86c1	Mastigocladopsis	plantaricin: plantaricin C family lantibiotic	NF000539.0	cc1	Mastigocladopsis repens PCC 10914	2145	2	34.8	yes	MANIKISELRPAGAELFQDSESFLNELNDQEMSVFGGGDGDVVVTVDSNVDTLDIKTKDISVSIG	WP_017314970_2	1.80E-06
353	WP_106240815	#2e86c1	Pleurocapsa	plantaricin: plantaricin C family lantibiotic	NF000539.0	cc1	Pleurocapsa sp. CCALA 161	1384	3	39.78	yes	MANIKLSELSPAGSELFQGHEDFLNELSDRELSDVLGGGASAATVSGKTMVSGISSGEFDYANYGNFNYAKIGNFEALQIKIKPTLLHHSFSTIIF	WP_106240815_3	4.60E-06
355	WP_096689510	#2e86c1	Calothrix	plantaricin: plantaricin C family lantibiotic	NF000539.0	cc1	Calothrix sp. NIES-4071	3172	6	11.66	yes	MAFLKISDLRPAGSEFFQDSESYLNELNEQEISATLGGGVVSVISQATVSVGISILTASLISNF	WP_096689510_6	4.70E-06
357	WP_017314970	#2e86c1	Mastigocladopsis	plantaricin: plantaricin C family lantibiotic	NF000539.0	cc1	Mastigocladopsis repens PCC 10914	2396	1	35.08	yes	MANIKISELRPAGAELFQDSESFLNELNDQEMSVFGGGDGDVVVTVDSNVDSVDIKTQDISVSIG	WP_017314970_1	2.10E-06
359	WP_066371470	#FF0000	Herbidospora	none	none	cc1	Herbidospora mongoliensis	2855	6	20.7	yes	MIPITELLMQGADAYTSLAEVAAVHEIETPEVTPTVSFVLGGAVSMTLTMRYSC	WP_066371470_6	none
360	WP_062346719	#FF0000	Herbidospora	none	none	cc1	Herbidospora yilanensis	205	1	39.35	yes	MSADLLMEGADAYTSLAEVATADQIDTPEITPALTVSAIVSWSLSTTLWAEC	WP_062346719_1	none
362	WP_155349848	#FF0000	Acrocarpospora	none	none	cc1	Acrocarpospora pleiomorpha	44	2	31.82	yes	MPTELLIGGADVYTSFAEIAAAHTDSAAAVPATISITWSICTLTIEGGC	WP_155349848_2	none
364	WP_155349848	#FF0000	Acrocarpospora	none	none	cc1	Acrocarpospora pleiomorpha	213	3	16.34	yes	MSTELLIEGADAYTSLAEVAVGAGVESPEATPALIISFSIGVSVTATAAMGC	WP_155349848_3	none
366	WP_155358788	#FF0000	Acrocarpospora	none	none	cc1	Acrocarpospora macrocephala	239	2	27.61	yes	MSVELLMKGADNYTSLAEVAAAAEMESPEATPALVISFSIGVSVTATAAMGC	WP_155358788_2	none
368	WP_062339008	#FF0000	Herbidospora	none	none	cc1	Herbidospora sakaeratensis	585	4	35.27	yes	MSAESLMEGADAYTSLAEVATTEPAESPEATPITISITTFFSSTIILEC	WP_062339008_4	none
370	WP_066371470	#FF0000	Herbidospora	Ragulator complex protein LAMTOR5	PF16672.5	cc1	Herbidospora mongoliensis	2298	2	44.88	yes	MSVELLMDGADAYTSLAEIAAEIDSPEILPTITITTITTISAISVTYGIGC	WP_066371470_2	5.90E-07
372	WP_062339008	#FF0000	Herbidospora	ImpE protein	PF07024.13	cc1	Herbidospora sakaeratensis	402	5	26.45	yes	MSTELLMEGADAYTSLAEVATAAEIEAPERLIDTIIWSICTLTLQGGC	WP_062339008_5	2.90E-07
374	WP_066371470	#FF0000	Herbidospora	none	none	cc1	Herbidospora mongoliensis	2658	1	45.59	yes	MSAELMMGGADAYAPLAEVATADPIETPEMTPVVSFITGLSYGVSVMGTYYWEC	WP_066371470_1	none
376	WP_062339008	#FF0000	Herbidospora	none	none	cc1	Herbidospora sakaeratensis	42	2	40.19	yes	MHTDLLMEGAGAYTSLAEIAATAEAETPEVTPAISFFTGAAVSITTTMAFSC	WP_062339008_2	none
378	WP_066371470	#FF0000	Herbidospora	none	none	cc1	Herbidospora mongoliensis	2521	7	19.33	yes	MPAELLMDGADAYTSLAEVAEVDAPEIVLDIITWSICTLTLQGHC	WP_066371470_7	none
380	WP_155358788	#FF0000	Acrocarpospora	none	none	cc1	Acrocarpospora macrocephala	440	1	39.28	yes	MSAEHLMEGADAYTSLAEVATANEIESPEATPLTTVTTISFISFTVVLGC	WP_155358788_1	none
385	WP_015207767	#2e86c1	Cylindrospermum	Dihydrofolate reductase	PF00186.19	cc1	Cylindrospermum stagnale PCC 7417	457	1	25.21	yes	MANIKLNDIKPAGAELFTDAESFLNELNETDINKIIGGGSTYARTCTGARTCATKQLPEFYLAG	WP_015207767_1	3.30E-05
387	WP_096537472	#2e86c1	Nostoc	none	none	cc1	Nostoc linckia NIES-25	981	3	27.62	yes	MATIKIHDLSPAGSELFQDSESFLNELTDEELGVNGGLRVASVTVTVTVTWTWTWTW	WP_096537472_3	none
394	WP_015216084	#2e86c1	Anabaena	plantaricin: plantaricin C family lantibiotic	NF000539.0	cc1	Anabaena cylindrica PCC 7122	1411	6	30.69	yes	MAVIAINDLRPTGAELFFGSESFMADLNDNELGNVNGGITPSWYFAAVGVTALVGYLANR	WP_015216084_6	3.20E-06
396	WP_068385845	#2e86c1	Leptolyngbya	CadC C-terminal domain 1	PF18500.1	cc1	Leptolyngbya sp. NIES-3755	3138	3	30.7	yes	MASIKISELRPVGSELFQDSESFLNELNDRDLDIRGGGDVNISVLSQYSYSYGISILTQSVVTVKTYNSPKSFFF	WP_068385845_3	2.20E-06
400	WP_015207767	#2e86c1	Cylindrospermum	plantaricin: plantaricin C family lantibiotic	NF000539.0	cc1	Cylindrospermum stagnale PCC 7417	1301	4	18.54	yes	MANIKVNDIKPAGAELFTDSESFFDELNESDLNKLIGGLNSTFAYTCTGAAGCRRQPLRR	WP_015207767_4	4.10E-06
403	WP_087592205	#2e86c1	Cyanobacteria	plantaricin: plantaricin C family lantibiotic	NF000539.0	cc1	Cyanobacteria unicellular cyanobacterium SU3	590	6	24.07	yes	MADIKISNLNPAGSDFFNDSESFMTELTDEQIKTTHGGSTAICYIAIGYLLAQ	WP_087592205_6	5.80E-06
406	WP_015207763	#2e86c1	Cylindrospermum	Dihydrofolate reductase	PF00186.19	cc1	Cylindrospermum stagnale PCC 7417	2206	1	25.21	yes	MANIKLNDIKPAGAELFTDAESFLNELNETDINKIIGGGSTYARTCTGARTCATKQLPEFYLAG	WP_015207763_1	3.30E-05
415	WP_027843178	#2e86c1	Mastigocoleus	plantaricin: plantaricin C family lantibiotic	NF000539.0	cc1	Mastigocoleus testarum BC008	1690	3	19.47	yes	MANIKVKEIQPAGIELFGDSESFMNELSGNELNNVIGGRTNTHAYTCTGARTCAKTK	WP_027843178_3	9.30E-07
417	WP_106289349	#2e86c1	Merismopedia	none	none	cc1	Merismopedia glauca CCAP 1448/3	1287	2	23.46	yes	MSTINIADLQVSGSDLFADSESYLNELDDSSFAASQIQGGFTPVPVATAIILFSAATRIAKEIMTPDCPPPPPFCE	WP_106289349_2	none
419	WP_138689268	#FF0000	Nonomuraea	none	none	cc1	Nonomuraea zeae	266	3	34.65	yes	MHDVVRPSKSSAIMELTAGYDAYADASEFSLSAESEAPAATPLTILVLGGFATSYVVSGIARKAWDRTFIFGC	WP_138689268_3	none
420	WP_138666048	#FF0000	Nonomuraea	Ubiquinol-cytochrome C reductase, UQCRX/QCR9 like	PF05365.12	cc1	Nonomuraea turkmeniaca	265	2	35.67	yes	MHDVVRPSKTAAIMELTAGYDAYADASEFSLPAESEAPAATPVTILVLGGFATSYVVSGIARKAWDRTFIFGC	WP_138666048_2	1.00E-05
422	WP_052856102	#FF0000	Streptomyces	Transposase DDE domain group 1	PF13701.6	cc1	Streptomyces kasugaensis	331	3	42.35	yes	MKTTAIMELVAGYEVYADSAELQVDATVNAPASTPACGAATVSWIVSQFSAKTVKDGC	WP_052856102_3	9.00E-07
424	WP_079181075	#FF0000	Streptomyces	none	none	cc1	Streptomyces sp. CB00316	466	4	33.65	yes	MKTTTIMELAAGYDAYTGAEELEVGATAEAPASTPLCAAAASAGVSWMASQFSARTISGGC	WP_079181075_4	none
426	WP_079189213	#FF0000	Streptomyces	none	none	cc1	Streptomyces kebangsaanensis	488	2	37.69	yes	MEKTTAIMELLAGYEAYSDARELNVTAAAEAPATSPACIASATASFVASQFSAKTVAGGC	WP_079189213_2	none
428	WP_127931424	#FF0000	Nonomuraea	Ubiquinol-cytochrome C reductase, UQCRX/QCR9 like	PF05365.12	cc1	Nonomuraea polychroma	276	2	25.46	yes	MHDVVRPSKTAAIMELTAGYDAYADASEFSLPAESEAPAATPVTILVLGGFATSYVVSGIARKAWDRTFIFGC	WP_127931424_2	1.00E-05
430	WP_049976882	#FF0000	Streptomyces	none	none	cc1	Streptomyces leeuwenhoekii	31	1	44.33	yes	MDTHELIEGFDAYVEAEELNEDAMVDAPATTVPCTVASFATGYFSC	WP_049976882_1	none
432	WP_167721203	#2e86c1	Tolypothrix	none	none	cc1	Tolypothrix sp. PCC 7910	1664	10	19.71	yes	MSRLRIGDLNSAGSELFQDSETFLLDLKDDEILMHHGGIFITTNISVINVPISEDIFAPSISFIR	WP_167721203_10	none
433	WP_168643398	#2e86c1	Dolichospermum	none	none	cc1	Dolichospermum sp. UHCC 0259	1380	7	21.15	yes	MSKLKVYDLNSAGFQFFQDTETFLMDLKEDDLSITRGGIIIFPNISVIQVPVSEDLYQPSISIIR	WP_168643398_7	none
435	WP_070396036	#2e86c1	Moorea	Type-A lantibiotic	PF04604.13	cc1	Moorea producens PAL-8-15-08-1	2014	1	30.37	yes	MSSIKIAELRPAGSELFQDSESFLNELSDGQEMDMVLGGGRRSKRSRGGNVNTVNTIFNTVINTTIINTTIINKRRGRRPRKH	WP_070396036_1	4.30E-06
437	WP_099700413	#2e86c1	Chroococcales	plantaricin: plantaricin C family lantibiotic	NF000539.0	cc1	Chroococcales cyanobacterium IPPAS B-1203	1916	2	32.73	yes	MASIKIFELTPAGAELFQDTESFLNELNDQESLMISGGNGSDLNISNISQVTVSVGISIKSVSVVSQVKGNIYFGKRNRR	WP_099700413_2	1.50E-06
439	WP_086760950	#2e86c1	Nostoc	none	none	cc1	Nostoc sp. RF31YmG	1796	11	21.54	yes	MSRLKVSDLNSAGSEFFQDSETFLLDLKDDELCMQYGGIFITTNISVINVPISEDIFAPSISFIR	WP_086760950_11	none
441	WP_099700413	#2e86c1	Chroococcales	plantaricin: plantaricin C family lantibiotic	NF000539.0	cc1	Chroococcales cyanobacterium IPPAS B-1203	3008	4	29.5	yes	MASIKIFELTPAGTELFQDTESFLNELNDQESLMISGGDGSNVNISNISQVTISVGISIKTFSVVSQVKFDNRRGR	WP_099700413_4	2.90E-06
443	WP_096589596	#2e86c1	Calothrix	none	none	cc1	Calothrix sp. NIES-2098	1557	10	23.58	yes	MSRLKVSDLNSAGSEFFQDSETFLLDLKDDELCMQYGGIFITTNISVINVPISEDIFAPSISLIR	WP_096589596_10	none
446	WP_079191916	#FF0000	Streptomyces	none	none	cc1	Streptomyces sp. CB00455	99	3	34.11	yes	MNNTDSVMDLVAGYQTYMDAGDLDVSAVADAPATTWYCASAAASFLSAVTYEATC	WP_079191916_3	none
447	WP_052680420	#FF0000	Streptomyces	none	none	cc1	Streptomyces sp. NRRL F-4428	631	4	44.78	yes	MRNDQSTLEDLVTGYESYADADEIEVDAVTGAPATTPFCGAAASFMLSYVTTNGPG	WP_052680420_4	none
449	WP_051708270	#FF0000	Micromonospora	none	none	cc1	Micromonospora parva	356	1	52.86	yes	MQEKANNIEELLAGYETYSTAEDIDLSAVSDAPATTPGCAIVSAGVSWMSGQVVSKTIDDGC	WP_051708270_1	none
451	WP_051837683	#FF0000	Streptomyces	none	none	cc1	Streptomyces sp. NRRL F-2580	630	4	51.35	yes	MTNDQSTLEDLVTGYESYADADEIEVDAVTGAPATTPFCGAVASFALSYVTTNGPG	WP_051837683_4	none
453	WP_079191916	#FF0000	Streptomyces	none	none	cc1	Streptomyces sp. CB00455	306	2	37.43	yes	MEKATSVIELLSGYEAYASAEDINLSAASDAPATTWGCAAVSASISWMSGQVVSKTVDDGC	WP_079191916_2	none
455	WP_107777750	#FF0000	Nocardioides	none	none	cc1	Nocardioides sp. CF167	5	1	34.87	yes	MNTRDLMEGFVAYAEAEELNVDAMVDAPATTVPCTVASFATGYFSC	WP_107777750_1	none
457	ALC22075	#FF0000	Streptomyces	Alpha/beta hydrolase	PF06259.12	cc1	Streptomyces pristinaespiralis	612	5	33.08	yes	MADLQQTGSISELVAGYDTYSEAGELVAEAAADAPASTPTCAAATISWLGSQLTVKTYKEGC	ALC22075_5	1.60E-06
459	WP_133890759	#FF0000	Streptomyces	none	none	cc1	Streptomyces sp. BK208	3750	3	40.34	yes	MNEKLIAGYAAYTDAAELSAAALGEAPATIEIVTATVASFVASAKTYDISC	WP_133890759_3	none
461	WP_109595189	#FF0000	Actinoplanes	Duffy-antigen binding protein	PF12361.8	cc1	Actinoplanes xinjiangensis	679	5	45.48	yes	MSNHIENTEIVDLVAQYETYAEANELNLSAASDAPATSPVCAASAASSTWCAAGASAVSGATYEFVC	WP_109595189_5	2.20E-05
463	WP_157846946	#FF0000	Streptomyces	Bacterial protein of unknown function (DUF945)	PF06097.11	cc1	Streptomyces achromogenes subsp. achromogenes	324	1	50.72	yes	MEKVDSIMELLSGYETYSTVEEINLSAASDAPATTLVCAATAGASWLTGQAVSKTYDEGC	WP_157846946_1	1.40E-06
465	WP_051837683	#FF0000	Streptomyces	YyzF-like protein	PF14116.6	cc1	Streptomyces sp. NRRL F-2580	401	5	49.08	yes	MSHDQNTLEELVTGYESYADADEIEVDAVTGAPATTPFCGAAASFMLSYVTTNGPG	WP_051837683_5	7.30E-06
467	WP_052680420	#FF0000	Streptomyces	YyzF-like protein	PF14116.6	cc1	Streptomyces sp. NRRL F-4428	402	3	45.27	yes	MSHDQNTLEELVTGYESYADADEIEVDAVTGAPATTPFCGAAASFMLSYVTTNGPG	WP_052680420_3	7.30E-06
469	WP_051700182	#FF0000	Streptomyces	YyzF-like protein	PF14116.6	cc1	Streptomyces sp. NRRL F-4474	402	4	47.9	yes	MSHDQNTLEELVTGYESYADADEIEVDAVTGAPATTPFCGAAASFMLSYVTTNGPG	WP_051700182_4	7.30E-06
471	WP_157846946	#FF0000	Streptomyces	none	none	cc1	Streptomyces achromogenes subsp. achromogenes	66	2	50.54	yes	MNNTDSIMELVAGYETYMDASELDVNAVTDAPATTWYCVSAGVSFVTAATYEATC	WP_157846946_2	none
473	WP_055704502	#FF0000	Streptomyces	none	none	cc1	Streptomyces puniciscabiei	158	1	47.61	yes	MDKSTAIMELVSNYTSYADVTELNVTAAADAPATTPVCAVSIASSSWCAAGASAASGATYEITC	WP_055704502_1	none
475	WP_052856102	#FF0000	Streptomyces	none	none	cc1	Streptomyces kasugaensis	66	2	45.44	yes	MDNKSAVITDLVAGYSTYTEAGELNVSAAAGAPATTYICASVAISRTSSVKCSAAASAISGATYEWTC	WP_052856102_2	none
477	WP_109595189	#FF0000	Actinoplanes	none	none	cc1	Actinoplanes xinjiangensis	350	2	52.65	yes	MEQIETVMELVANYEAYTTGAEELAVSAAADAPATSAPCGAAGVSWIVSQFSGKTISEGC	WP_109595189_2	none
479	WP_093619522	#FF0000	Actinoplanes	none	none	cc1	Actinoplanes philippinensis	343	5	49.72	yes	MEQIETVMELVANYEAYTTGAEELAVSAAADAPATSAPCAAAGVSWIVSQFSGKTISEGC	WP_093619522_5	none
481	WP_051700182	#FF0000	Streptomyces	none	none	cc1	Streptomyces sp. NRRL F-4474	631	2	53.7	yes	MSNDQSMLEELVTGYESYADADEIEVDAVTGAPATTPFCGAVASFALSYVTTNGPG	WP_051700182_2	none
483	WP_052680420	#FF0000	Streptomyces	none	none	cc1	Streptomyces sp. NRRL F-4428	860	2	45.93	yes	MRNDQSTLEDLVTGYESYADADEIEVDAVTGAPATTPFCGAVASFALSYVTTNGPG	WP_052680420_2	none
485	WP_055704502	#FF0000	Streptomyces	Protein of unknown function (DUF1118)	PF06549.12	cc1	Streptomyces puniciscabiei	433	2	44.41	yes	MEKATAIEDLMAGYEAYSDARELGVTSAVDAPATSPACIASATASWLASQFSAKTISGGC	WP_055704502_2	1.00E-06
487	WP_130878496	#FF0000	Streptomyces	none	none	cc1	Streptomyces netropsis	100	1	52.91	yes	MDKTDAIMDLVSNYDAYADVAELNVTAAADAPATTPVCAATLASSGWCAAGASAISGATYEAGC	WP_130878496_1	none
489	WP_093619522	#FF0000	Actinoplanes	Fungal mating-type pheromone	PF08015.11	cc1	Actinoplanes philippinensis	85	1	54.15	yes	MDKNTEIVDLVAQYETYAEANELNLSAASDAPATSPVCAVSAASSTWCAAGASAVSGATYEFVC	WP_093619522_1	3.20E-07
491	WP_093619522	#FF0000	Actinoplanes	Two-component Enterococcus faecalis cytolysin (EFC)	PF16934.5	cc1	Actinoplanes philippinensis	671	4	50.47	yes	MSNNTENTEIVDLVAQYETYAEANELNLSAASDAPATSPVCAVSAASSTWCAAGASAVSGATYEFVC	WP_093619522_4	3.80E-06
493	WP_133890759	#FF0000	Streptomyces	none	none	cc1	Streptomyces sp. BK208	3493	2	48.66	yes	MNEKLIAGYAAYTDAAELSAAALDEAPATIEIVTATVASFVASAETYDIKC	WP_133890759_2	none
496	WP_145487439	#FF0000	Streptomyces	none	none	cc1	Streptomyces collinus	417	1	43.39	yes	MEKTTAIMELMAGYEAYSDARELNVAAAAEAPATTPACLASATASFVASQFSAKTIAGGC	WP_145487439_1	none
498	WP_109595189	#FF0000	Actinoplanes	Fungal mating-type pheromone	PF08015.11	cc1	Actinoplanes xinjiangensis	85	1	55.14	yes	MDKNTEIVDLVAQYETYAEANELNLSAASDAPATSPVCAASAASSTWCAAGASAVSGATYEFVC	WP_109595189_1	7.30E-07
500	WP_145487439	#FF0000	Streptomyces	none	none	cc1	Streptomyces collinus	152	2	30.88	yes	MDKSMAIMELVSNYDAYADVDELNISAAADAPATTPVCAVSVASSSWCAASASAASGATYELTC	WP_145487439_2	none
502	WP_104258544	#FF0000	Rathayibacter	none	none	cc1	Rathayibacter tritici	245	2	24.5	yes	MTKTNAIMDLVSGYESYSSAADIGVSAATDAPATTAYCAAATVTWLTGLAVSKTIDDGC	WP_104258544_2	none
504	WP_170198719	#FF0000	Thermopolyspora	none	none	cc1	Thermopolyspora flexuosa	139	1	52.67	yes	MKGTPMMELVAGYDAYATAAELNIEASVDAPATSPVCAVSAASSKWCVSALIGASAGATYKVGC	WP_170198719_1	none
506	WP_019505167	#2e86c1	Pleurocapsa	ATP-NAD kinase	PF01513.21	cc1	Pleurocapsa sp. PCC 7319	6134	1	29.51	yes	MTNINIDNISDLDLNGNDLFEDSESFITELSDGNEQAIIGGCVLTPIGDCVHTQGCGNTMICPAISWALS	WP_019505167_1	3.60E-07
507	WP_019505167	#2e86c1	Pleurocapsa	none	none	cc1	Pleurocapsa sp. PCC 7319	6978	3	28.96	yes	MANINIENISDLALNGNDLFEDSESFITELDDNEQAIMGGCAVTNIGNCDNTVGDCRVTINIT	WP_019505167_3	none
509	WP_019505167	#2e86c1	Pleurocapsa	none	none	cc1	Pleurocapsa sp. PCC 7319	3810	2	28.99	yes	MANINIENISDLALNGNDLFEDSESFITELDDNEQAIMGGCAVTNIGDCGNTVGDCRVTINIT	WP_019505167_2	none
511	WP_086769105	#2e86c1	Nostoc	Type-A lantibiotic	PF04604.13	cc1	Nostoc sp. 106C	2386	5	26.12	yes	MPSIHISELFPIGSKLFQDSETFLNEINDNELQNIKGGASIVSEVNNSAINNTFGNAQSDTTNNGNINALAVTVVDDTAILTTIL	WP_086769105_5	1.50E-05
516	WP_052269673	#FF0000	Streptomyces	none	none	cc1	Streptomyces pluripotens	4374	2	45.33	yes	MSAQNLMNGFAAYVDAEELAAQPAAEAREEQSLSVAVTLVTISLMHTYDTGC	WP_052269673_2	none
517	WP_136238412	#FF0000	Streptomyces	none	none	cc1	Streptomyces sp. Akac8	6134	3	36.27	yes	MNTTDALMAGYAAYTSADEIAAGQDGGAPEISPVSLSIAVS	WP_136238412_3	none
519	WP_019501955	#2e86c1	Pseudanabaena	plantaricin: plantaricin C family lantibiotic	NF000539.0	cc1	Pseudanabaena sp. PCC 6802	6819	13	17.03	yes	MSNLLIPNLSSNGSDLFSGNENFMSEISESDLAMVFGGKFTPPVKTPPEPGPFPEPIPTSPIVITTRA	WP_019501955_13	1.60E-06
520	WP_019501955	#2e86c1	Pseudanabaena	plantaricin: plantaricin C family lantibiotic	NF000539.0	cc1	Pseudanabaena sp. PCC 6802	8846	9007	14.83	yes	MANLAISNLCSNGSDLFSGSENFMSEISESDLAMVFGGKYTPPVKTPPEPVPFPEPIPTPPIVITTKAY	WP_019501955_9007	1.20E-06
522	WP_019501955	#2e86c1	Pseudanabaena	none	none	cc1	Pseudanabaena sp. PCC 6802	3465	10	19.54	yes	MANIDITSLHSTGLDLFSDDENFMCEISESSSAIINGGLVPVPITQEFPTTKFSPLCVPVTPFTPGLITPTPLPTTNVVL	WP_019501955_10	none
524	ANS68054	#FF0000	Streptomyces	none	none	cc1	Streptomyces lincolnensis	157	2	33.98	yes	MNSNDSIMELVAGYETYMDADELDVTAVADAPATTWYCASAAASFISAATYEATC	ANS68054_2	none
526	WP_053706403	#FF0000	Streptomyces	none	none	cc1	Streptomyces sp. WM6373	146	3	36.11	yes	MNSNDSIMELVAGYETYMDANELDVTAVADAPATTWYCASAAVSFLSAATYEATC	WP_053706403_3	none
528	AWS47415	#FF0000	Streptosporangium	none	none	cc1	Streptosporangium sp. caverna	342	3	34.46	yes	MKETMLIEEMVTGYRSYADISDLNVAAAVDAPATTPFCGALASFAFSYITTGGPGGG	AWS47415_3	none
530	WP_053706403	#FF0000	Streptomyces	NifU-like N terminal domain	PF01592.16	cc1	Streptomyces sp. WM6373	405	2	44.81	yes	MEKATSIVELLSGYEAYSSVEEINLSAASDAPATTWGCAAVSASISWMSGQVVSKTVDDGC	WP_053706403_2	9.00E-06
533	WP_106115031	#FF0000	Actinopolyspora	none	none	cc1	Actinopolyspora mortivallis	70	4	14.85	yes	MFSVQFVNGKEKLMEKSAAIMELVSNYNTYADAGELNVTTASDAPATSPACAVSAAASAASSWYCVSAASGASVSATAEANC	WP_106115031_4	none
535	ANS68054	#FF0000	Streptomyces	NifU-like N terminal domain	PF01592.16	cc1	Streptomyces lincolnensis	452	1	52.1	yes	MEKATSIVELLSGYEAYSSAEEINLSAATDAPATTWGCAAVSASVSWMSGQVVSKTVDDGC	ANS68054_1	4.90E-06
537	WP_017198207	#FF0000	Arthrobacter	none	none	cc1	Arthrobacter sp. M2012083	60	2	10.55	yes	METQELMSLVSGYSTYAAADELSFTAESSEPASTPICGFLASFAFSYITSGGPGR	WP_017198207_2	none
541	ALC22075	#FF0000	Streptomyces	none	none	cc1	Streptomyces pristinaespiralis	430	1	52.23	yes	MDKTGAITELIEGYDSYSDAEELNSTAAAEAPATSAPCGAASVSWLASQFTVKTYKEGC	ALC22075_1	none
543	WP_130878496	#FF0000	Streptomyces	none	none	cc1	Streptomyces netropsis	545	5	31.9	yes	MEKSEAIIDLMAGYDAYSSADELNTTAAAEAPASTPACAAATMSWLGSQLTVKTYKDGC	WP_130878496_5	none
545	WP_093619522	#FF0000	Actinoplanes	none	none	cc1	Actinoplanes philippinensis	913	3	51.84	yes	MEKTENLNELIEGYLVYSETDELNVAAAADAPATSAPCAAATASWLISQFSGKTIAEGC	WP_093619522_3	none
552	WP_079181075	#FF0000	Streptomyces	none	none	cc1	Streptomyces sp. CB00316	178	2	44.69	yes	MSNKSTVIADLVAGYDAYTEVDELNVSAAAGAPATTWVCVSVVASRASSVKCGAWASAGASAVSGATYEITC	WP_079181075_2	none
560	WP_158686821	#FF0000	Streptomyces	none	none	cc1	Streptomyces sp. CNT372	6659	1	37.7	yes	MQKNDTVDIMELVGGFEAYAEAAELNFEASADAPAITPTLTTIAYTKVSVASVSASIKVGC	WP_158686821_1	none
564	SNT25203	#FF0000	Streptosporangium	Phage Coat protein B	PF05356.11	cc1	Streptosporangium subroseum	72	1	39.58	yes	MTNGTSMMELVAGYNAYASANELSIAASVDAPATTPVCAASVAISVASSWYCASAAASAAGGATYRIGC	SNT25203_1	4.70E-07
567	AWS47415	#FF0000	Streptosporangium	Phage Coat protein B	PF05356.11	cc1	Streptosporangium sp. caverna	73	2	35.11	yes	MTNGTSMMELVAGYNAYASANELSIAASVDAPATTPVCAASVAVSVASSWYCASAAASAAGGATYRLGC	AWS47415_2	5.60E-07
569	WP_052680420	#FF0000	Streptomyces	Two-component Enterococcus faecalis cytolysin (EFC)	PF16934.5	cc1	Streptomyces sp. NRRL F-4428	128	1	57.04	yes	MDNASMMDLVAGYNTYAEASELGIQAVADAPATTPVCAATVAASAVSSGWCASAAASAAGGATYKLGC	WP_052680420_1	3.10E-06
571	SNT25203	#FF0000	Streptosporangium	none	none	cc1	Streptosporangium subroseum	340	4	32.67	yes	MKETMLIEEMVTGYRSYADISDLNVAAAVDAPATTPFCGALASFAFSYITTGGPGGG	SNT25203_4	none
573	WP_016570561	#FF0000	Streptomyces	none	none	cc1	Streptomyces albulus	66	2	35.62	yes	MDNKSTVITDLVAGYSTYTEAGELNVSAAAGAPATTYICASVAISRVSSPRCAASASAVSGATYEWTC	WP_016570561_2	none
576	WP_051837683	#FF0000	Streptomyces	Two-component Enterococcus faecalis cytolysin (EFC)	PF16934.5	cc1	Streptomyces sp. NRRL F-2580	127	3	56.51	yes	MDNASMMDLVAGYNTYAEASELGIQAVADAPATTPVCAATIAASAVSSGWCASAAASAAGGATYKLGC	WP_051837683_3	3.80E-06
582	WP_130878496	#FF0000	Streptomyces	none	none	cc1	Streptomyces netropsis	363	2	44.52	yes	MEKSEAIMDLMAGYDAYSTVDELNTTAAADAPATTAPCGAATVSWLASQFTVKTYKDGC	WP_130878496_2	none
590	WP_051700182	#FF0000	Streptomyces	Two-component Enterococcus faecalis cytolysin (EFC)	PF16934.5	cc1	Streptomyces sp. NRRL F-4474	128	1	55.92	yes	MDNASMMDLVAGYNTYAEASELGIQAVADAPATTPVCAATVAASAVSSGWCASAAASAAGGATYKLGC	WP_051700182_1	3.10E-06
592	PZN41733	#FF0000	Actinobacteria	none	none	cc1	Actinobacteria bacterium	127	2	48.3	yes	MNATSMMELVAGYDTYAAPAELNLEASVDAPATSPVCAVSAASSWYCVSASLGASAGATYKVGC	PZN41733_2	none
594	WP_016570561	#FF0000	Streptomyces	Transposase DDE domain group 1	PF13701.6	cc1	Streptomyces albulus	330	1	38.66	yes	MKTTAIMELVAGYEVYADSAELQVDAAVDAPASTPACAAATLSWIVSQFSGKTVKDGC	WP_016570561_1	1.50E-06
597	WP_159425899	#FF0000	Streptomyces	GAGA factor	PF09237.11	cc1	Streptomyces noursei ATCC 11455	105	2	20.22	yes	MKTQDLIAGYAAYVDVAELNVSAASEAPATSPVCFAAATSSAACLAATSSGWCVAGAGAGVGGGIAQSVKHGC	WP_159425899_2	2.80E-06
599	WP_051708270	#FF0000	Micromonospora	none	none	cc1	Micromonospora parva	102	2	43.5	yes	MNTDITKSDNIMELVSSYETYLEADDDLGVSAVADAPATTWYCASAAVSFLTAATYEATC	WP_051708270_2	none
602	WP_089091039	#2e86c1	Nodularia	none	none	cc1	Nodularia sp. NIES-3585	2883	1	43.32	yes	MANITLSEINAAGSELFQDSESFLNEFSDVDSISGGQIGYGGGLGAQVAVSDPTTLNKLAGAFVTVYAIGHVTVLAKSFSKF	WP_089091039_1	none
605	WP_103136595	#2e86c1	Nostoc	none	none	cc1	Nostoc sp. CENA543	2304	2	51.91	yes	MAFIAINELRATGAELFQDSESFLNELNNLDNSVHGGYSGAYSNSTGTVLGIAEKGFEFGVITVGIDAIGHLAKSFSDDKAGYYY	WP_103136595_2	none
607	TVP62740	#2e86c1	Nodularia	none	none	cc1	Nodularia sp. (in: Bacteria)	2910	2	33.92	yes	MANIKLSQLHAAGSELFNDSESFLNELSDVDSISGGQVGYATGASNPFTLTKLAEAFVTIYAIEHVTILAKSFSVTVY	TVP62740_2	none
609	WP_069073064	#2e86c1	Nostoc	none	none	cc1	Nostoc sp. KVJ20	2794	4	30.97	yes	MANITLSELQVGSALFQDSESFLTDLNDVNAVYGGEGYGYDPFLEYGAKGFEFSILGLGINNVVSLAKSFSEGDGFL	WP_069073064_4	none
617	WP_009343975	#2e86c1	Cylindrospermopsis	none	none	cc1	Cylindrospermopsis raciborskii CENA303	2164	2	32.9	yes	MASIKLDQLQSTGSELFQDSESFLNDMSDINSISIHGGFNSTVSDMSIFTKLAEAFVNAYGIAHIAYLAKSYSSGV	WP_009343975_2	none
619	WP_038089561	#2e86c1	Tolypothrix	Ribosomal protein S12/S23	PF00164.25	cc1	Tolypothrix bouteillei VB521301	1743	2	39.51	yes	MANIKVSDMNLAGSELFMDSESFLNDLTDMDVTSVQGGEGYGLGEFYGLNYKVLEAGLVGLGVTNVVSLVKSFSANGLGGIGTGGII	WP_038089561_2	1.20E-05
621	WP_103136595	#2e86c1	Nostoc	none	none	cc1	Nostoc sp. CENA543	1527	3	45.04	yes	MASINLTELQVTGAQLFQDSESFLNDLSNLDDTVHGGNYAYSSSTGAVLGIVEKGFEFGVITIGIDAIGHLAKSFSDNKVYY	WP_103136595_3	none
623	WP_015139846	#2e86c1	Nostoc	none	none	cc1	Nostoc sp. PCC 7524	1626	1	33.76	yes	MASINLTELQATGSDLFQDSESFLQEMTSLEDSIYGGYDGGYSRSTDNIVAFTVKAFEFGIITFGIDAIVHLSKSFSDYNSQA	WP_015139846_1	none
626	WP_015113151	#2e86c1	Nostoc	none	none	cc1	Nostoc sp. PCC 7107	1896	4	26.15	yes	MANITLSELNIAGSQLFQDSESFLNDLSDVDLSAAHGGNNANYADYGYGSDSYISVFNKLIEGFVVVYAIQHIFSIAKSFSKYNY	WP_015113151_4	none
628	WP_057178590	#2e86c1	Cylindrospermopsis	D-isomer specific 2-hydroxyacid dehydrogenase, catalytic domain	PF00389.30	cc1	Cylindrospermopsis raciborskii GIHE 2018	1877	1	43.58	yes	MASIKLGQLQTTGSELFQDSESFLNEMSDVNSISVYGGGSDVSDMYTLTKLGEAFVNTYGIGHIAYLAKSYSDHDYYW	WP_057178590_1	9.70E-06
630	WP_096575011	#2e86c1	Anabaenopsis	none	none	cc1	Anabaenopsis circularis NIES-21	3149	4	31.24	yes	MANITLSELNAAGSQFFQDSESFLNDLSDVDAIATHGADSNSNSYISDFYGFNKLIEGFVDVYAIQHVYGIAKSFSKGGYSNSQY	WP_096575011_4	none
637	WP_015212417	#2e86c1	Anabaena	none	none	cc1	Anabaena cylindrica PCC 7122	1994	3	33.28	yes	MASIKLSELQATGSELFQDSESFLNEMSDVNSIYGGSYGSNVSDMSTFTKLAEAFVNVYGIGHIAYLAKSYSDNGYGY	WP_015212417_3	none
639	WP_066383651	#2e86c1	Anabaena	none	none	cc1	Anabaena sp. 4-3	2788	3	45.48	yes	MAFIAVNELRATGSELFQDSESFLNELNNLDDSVHGGGSGYSGATNGVLDLAEKGFEFGVITYGIDAIGHMAKSFSDASTGGW	WP_066383651_3	none
641	TAE59458	#2e86c1	Nostocales	none	none	cc1	Nostocales cyanobacterium	2334	1	40.95	yes	MANIKLSELHVAGSELFQDSESFLNEMNDSDGILVKGGSGSYFPDLIDYSIKGKEFALLGFAIDSAVSLAKSFSKHGDW	TAE59458_1	none
649	WP_016950446	#2e86c1	Anabaena	none	none	cc1	Anabaena sp. PCC 7108	1733	3	34.49	yes	MANIQLSELQVTGSELFQDSESFLNEMNDVNSVYGGSYSNHFSDNSTLVKLAEAFVNVYAVGHIAYLAKSYSHSNSYGY	WP_016950446_3	none
653	WP_096537472	#2e86c1	Nostoc	none	none	cc1	Nostoc linckia NIES-25	723	5	16.66	yes	MATIKIHDLNPAGCELFQDSESFLHELTDAELGVQGGFRTQSFTYCWPVSWTIPL	WP_096537472_5	none
658	WP_089091039	#2e86c1	Nodularia	Anthrax toxin lethal factor, N- and C-terminal domain	PF07737.11	cc1	Nodularia sp. NIES-3585	2496	4	33.48	yes	MANITLSELHAAGSELFNDSESFLNEFSDVDSISGGADASYAASNASTLTKLAEAFVLVYAIDHVTVLAKSFSLSVI	WP_089091039_4	0.0015
663	WP_062295185	#2e86c1	Nostoc	none	none	cc1	Nostoc piscinale CENA21	2236	6	32.01	yes	MANITLSELNAVGSQLFQDSESFLNELSEVDAIAAHGADSNSNSYISDFYGFNKLIEGFVDVYAIQHVYGIAKSFSHGGYY	WP_062295185_6	none
667	WP_096536886	#2e86c1	Nostoc	Transposon-encoded protein TnpW	PF14202.6	cc1	Nostoc linckia NIES-25	2902	4	28.61	yes	MANITLSELYVSGSELFEGTESFLNDLNDADSISGGNYNGFSDISTLTKLAEAYVDTYAIGHVTFVAKSYSSSGAGGYY	WP_096536886_4	1.40E-05
671	RCJ30949	#2e86c1	Nostoc	Inositol phosphatase	PF12456.8	cc1	Nostoc minutum NIES-26	2534	6	29.06	yes	MATINLFELHAAGSELFQDSESFLNELSDVDSISGGSYATESVSDLSGLTKLAEAFVLTYGIGHIVVLTKSYSNDY	RCJ30949_6	1.20E-05
673	WP_099068319	#2e86c1	Nostoc	none	none	cc1	Nostoc linckia z15	1189	6	22.89	yes	MATIKIHDLNPAGSELFQDSESFLNELTDAELGLQGGLKTQSFTYCWPITWTILL	WP_099068319_6	none
676	WP_137906310	#2e86c1	Dolichospermum	Carbohydrate binding module (family 35)	PF16990.5	cc1	Dolichospermum planctonicum	1784	1	34.17	yes	MASITLSQLNVTGSELFQDSESYLNDLNDASSVAVHGGGSYNSGFGEYGDFGVKYLEYLVDGYAIASIKHIAKSFSHNPSAPSVTAHY	WP_137906310_1	4.90E-06
678	WP_104387267	#2e86c1	Cuspidothrix	RNA12 protein	PF10443.9	cc1	Cuspidothrix issatschenkoi CHARLIE-1	1618	1	44.0	yes	MASIKLSQLQVPGSELFQDSESFLNEMNDVDTITIQGGSGSGIHDLVEYSIKGKEFVLLGFAIDNVVSLAKSFSRGYDYSHG	WP_104387267_1	5.90E-06
681	WP_096559014	#2e86c1	Nostoc	none	none	cc1	Nostoc sp. NIES-4103	3511	6	25.7	yes	MANITLSELHIAGSELFQDSESFLNELNNVDSISGGSYGSHVSDFSTLTKLAEAFVNVYGIGHITYLAKSFSHSDSYSYG	WP_096559014_6	none
684	WP_038089561	#2e86c1	Tolypothrix	none	none	cc1	Tolypothrix bouteillei VB521301	2091	1	55.33	yes	MANIKVSDMNLAGSELFMDSESFLNDLTDMDVTSVQGGEGYGLGEFYGLNYKVLEAGLVGLGITNVVSLVKSFSANGLGGIGTGATTGATTAAGTGATTAGASTLQLTI	WP_038089561_1	none
686	RCJ14929	#2e86c1	Nostoc	Transposon-encoded protein TnpW	PF14202.6	cc1	Nostoc sp. ATCC 43529	3013	1	33.28	yes	MANITLSELYVSGSELFEGTESFLNDLSDADSISGGEYASFSDISTLTKLAEAYVNTYAIGHITYVAKSYSNGTYY	RCJ14929_1	1.00E-05
691	WP_073644071	#2e86c1	Nostoc	none	none	cc1	Nostoc calcicola FACHB-389	1959	4	29.12	yes	MANITLSELYVSGSELFEGTESFLNDLGDIDSISGGDSSNFSDLSSLTKLAEAYVDTYAIGHIAFIAKSFSQSKG	WP_073644071_4	none
693	WP_066383651	#2e86c1	Anabaena	Dor1-like family	PF04124.12	cc1	Anabaena sp. 4-3	1635	6	33.36	yes	MASINLTELHNTGSELFQDSESFLHEMTNLDHSIYGGYSGYTDNVVAFTVKAFEFSIITYGIDAIVHLVKSFSESNSQY	WP_066383651_6	7.30E-06
697	WP_006195640	#2e86c1	Nodularia	none	none	cc1	Nodularia spumigena UHCC 0039	5128	9	35.02	yes	MANIKLFELNTTGSELFLDSESFLNELNDVDSISGGSTSSQGYDQGYGYKTVSGISTLTKLAEAFVTVYAIGHVTVLAKSFSHGY	WP_006195640_9	none
699	WP_087539234	#2e86c1	Nostocales	none	none	cc1	Nostocales cyanobacterium HT-58-2	3633	3	40.23	yes	MAHIKVLELRPAGSELFIDSETYLNDLSDVDTTSVHGGFGHGFTAFTAVNFKVLEAGAIGLGITNVVSLVKSFSGGASTGGY	WP_087539234_3	none
702	WP_006195640	#2e86c1	Nodularia	none	none	cc1	Nodularia spumigena UHCC 0039	2688	5	38.06	yes	MANIKLSELHAAGSELFHDSESFLNEFSDVDSISGGQVTVATGATYVASNASTLTKLAEAFVITYAVEHVTILAKSFSITGIY	WP_006195640_5	none
705	WP_069073064	#2e86c1	Nostoc	Domain of unknown function (DUF4367)	PF14285.6	cc1	Nostoc sp. KVJ20	1958	7	25.92	yes	MTKITLFELRPLGSELFQDSENFLTDLSDMDSISINGGEGYGYEQLLQYGIKGFEFSILGFGINNVVSLAKSFSEGV	WP_069073064_7	2.70E-06
707	WP_006195640	#2e86c1	Nodularia	Sialidase, N-terminal domain	PF02973.16	cc1	Nodularia spumigena UHCC 0039	2200	8	35.77	yes	MATITVSQLYATGSELFDDSENFLNELSDVDSSSLGEYNVVGGIITFTALTGTFVGTYAIGHATYVAKSYSQPYYGHRRRF	WP_006195640_8	1.40E-05
711	WP_062295185	#2e86c1	Nostoc	none	none	cc1	Nostoc piscinale CENA21	1747	4	34.24	yes	MANITLSELNVAGSQLFHDSESFLNDLSDVDMSAAYGGNNPNSYDYGYGSDSYISVFNKLIEGFVDVYAIQHIFSLAKSFSKSDY	WP_062295185_4	none
719	WP_087539234	#2e86c1	Nostocales	none	none	cc1	Nostocales cyanobacterium HT-58-2	3294	6	31.45	yes	MAHIKVSELRPAGSELFIDSESYLNDLSDMDTTSVHGGFGTGFDIFTAVNFKVLEAGVVGLGITNVVSLVKSFSGGASHSGY	WP_087539234_6	none
723	WP_073644071	#2e86c1	Nostoc	none	none	cc1	Nostoc calcicola FACHB-389	1568	8	24.69	yes	MANLTLSELYFSGSEFFQGEESFLSDLSDVDSIFGGDSSQFSDMSILTKLLEAYVNIYAIGQIAFIATSYSKQ	WP_073644071_8	none
725	WP_073644071	#2e86c1	Nostoc	none	none	cc1	Nostoc calcicola FACHB-389	2746	2	32.12	yes	MANITLSELYVSGSELFQGTESFLNDLSDVDSISGGNYAGFSDISTLTKLAEAYVDTYAIGHITFVAKSYSNGTYY	WP_073644071_2	none
727	WP_096537472	#2e86c1	Nostoc	none	none	cc1	Nostoc linckia NIES-25	1241	2	28.07	yes	MATIKIHDLSPAGSELFQDSESFLNELTDAELGVHGGRAAESVSISISVTLTVTYSWSWTW	WP_096537472_2	none
731	WP_096620064	#2e86c1	Calothrix	none	none	cc1	Calothrix sp. NIES-3974	2407	1	30.87	yes	MASIKVAELRPAGSELFQDSESFMNELNEMDTLSVHGGYDSGYGVFTNYLFLGYKDHLAYDINKYAIGVIAGLASKFNFSGYYYPSYY	WP_096620064_1	none
735	WP_087539234	#2e86c1	Nostocales	none	none	cc1	Nostocales cyanobacterium HT-58-2	3965	2	42.96	yes	MAHIKVSELRPAGSELFIDSESFLNDLSDVDVSSVHGGFGHGLGVFTALNFKVLEAGVVGLGITNVVSLVKSFSGGGESTAAGNVGISTDGATHGSIVIG	WP_087539234_2	none
737	WP_096589596	#2e86c1	Calothrix	Lactococcin-like family	PF04369.13	cc1	Calothrix sp. NIES-2098	2933	4	50.45	yes	MAAITVHDLRPAGADLFAGSENFMSDLADSELNTVNGGLTPVVIWGVAITSEYVIGAFAVGVGAGIYTAVK	WP_096589596_4	3.30E-06
740	WP_167721203	#2e86c1	Tolypothrix	none	none	cc1	Tolypothrix sp. PCC 7910	2187	3	46.54	yes	MAVIAISNLRPAGADLFAGSENFMSDLVDSELNAVNGGISPLVIWGVAITSEYVISAFSVGVGAGIYTALK	WP_167721203_3	none
742	AVH79628	#2e86c1	Nostoc	Bacteriocin class II with double-glycine leader peptide	PF10439.9	cc1	Nostoc sp. PCC 9201	316	3	34.43	no	MATIVISDISPVGYDLLFDSESYMTDISNNELDRVVGGTEPVSALVIGAIAFGTVVGAGLAGYGIGTLLK	AVH79628_3	2.00E-06
744	WP_015216084	#2e86c1	Anabaena	plantaricin: plantaricin C family lantibiotic	NF000539.0	cc1	Anabaena cylindrica PCC 7122	2566	7	30.3	yes	MAVIAINDLRPTGAELFFGSESFMADLNDNELGNVNGGITPSWYFAAVGVTALVGYLAN	WP_015216084_7	3.90E-06
747	WP_086760950	#2e86c1	Nostoc	none	none	cc1	Nostoc sp. RF31YmG	2072	4	49.0	yes	MAAIAIHDLRPAGADLFAGSENFMSDLVDSELNAVNGGISPLVIWGVAITSEYVISAFGVGVGAGIYTALK	WP_086760950_4	none
751	RCJ19623	#2e86c1	Nostoc	Two-component Enterococcus faecalis cytolysin (EFC)	PF16934.5	cc1	Nostoc minutum NIES-26	1601	1	41.27	yes	MANINISDLRPTGLELFSDSEGYMDELSYSEYNSIYGGLTPALVWSAVTVAARISSARCAIKASAVSVGVASAVSGWFTAGK	RCJ19623_1	0.00021
754	WP_167721203	#2e86c1	Tolypothrix	Lactococcin-like family	PF04369.13	cc1	Tolypothrix sp. PCC 7910	3085	2	50.84	yes	MAAIAISDIRPAGADLFAGSENFMSDLADSELNSINGGLTPVVIWGVAITSEYVIGAFAVGVGAGIYTAVKK	WP_167721203_2	1.30E-05
756	WP_104899482	#2e86c1	Nostoc	none	none	cc1	Nostoc sp. Peltigera membranacea cyanobiont N6	1758	2	48.13	yes	MASIAIIDLRPAGADLFAGSENFMSDVVDYELNTVNGGLTPFVIWGVAIASEYVIGAFAVGVGAGVYTALK	WP_104899482_2	none
758	WP_019501037	#2e86c1	Pseudanabaena	Bacteriocin class II with double-glycine leader peptide	PF10439.9	cc1	Pseudanabaena sp. PCC 6802	2023	1	23.27	yes	MATIAITELRPVGSALFSDSESFMDVLTESELGGVNGGLSPIVVYTVAINSWWFVGASAAGLSIGFWTNVK	WP_019501037_1	1.70E-07
760	RCJ19623	#2e86c1	Nostoc	none	none	cc1	Nostoc minutum NIES-26	1325	5	18.44	yes	MSNILIKDLNVPGSYLFSGEESYLNEINDKELNFNSGGISPIIGAFVLSYSASYYARQIHDKNKGIIAWL	RCJ19623_5	none
762	AVH79456	#2e86c1	Roholtiella	none	none	cc1	Roholtiella [Tolypothrix] sp. PCC 7415	1601	4	29.59	yes	MSTINIQDIKVAGSDLFSDDETYLNELSHDELGAAKGGITPTVAGTLALSSAFVLSYNLSKIGTELKNKFF	AVH79456_4	none
764	WP_019495762	#2e86c1	Calothrix	Bacteriocin class II with double-glycine leader peptide	PF10439.9	cc1	Calothrix sp. PCC 7103	1282	1	28.09	yes	MATIKISNLRPTGAELFSDSESYMNELGDSELVSVNGGLTSPLCIVTAIRVGYAAARSSQQCAIGIAGAIGGAGRWLENKRKN	WP_019495762_1	5.20E-05
765	WP_099068319	#2e86c1	Nostoc	none	none	cc1	Nostoc linckia z15	1726	4	30.8	yes	MATIKIHDLSPAGSELFQDSESFLNELTDAELGVHGGLRAESVSVTVSVTLTVTYSWSWTW	WP_099068319_4	none
767	WP_027845719	#2e86c1	Mastigocoleus	plantaricin: plantaricin C family lantibiotic	NF000539.0	cc1	Mastigocoleus testarum BC008	412	1	19.73	yes	MANIKVKEIQPAGIELFGDSESFMNELSGNELNNVIGGRTNTHAYTCTGARTCAKTK	WP_027845719_1	9.30E-07
772	BAZ42602	#2e86c1	Calothrix	ATP1G1/PLM/MAT8 family	PF02038.16	cc1	Calothrix sp. NIES-4101	956	1	38.66	yes	MATISISNLRATGANLFADSESYLSELTDAELNETKGGSIIAGAAFVAGVIIGVAISVRIAKEVC	BAZ42602_1	4.40E-05
775	WP_017318973	#2e86c1	Mastigocladopsis	Bacterial Alpha amylase C-terminal domain	PF18612.1	cc1	Mastigocladopsis repens PCC 10914	2674	3	20.94	yes	MANIKLNDLRPVGSDFFADNESYLNELTDNELGVTGGIITLDSVASLASALSIPTALTSEVSSALTSVIGG	WP_017318973_3	8.80E-06
778	AVH79456	#2e86c1	Roholtiella	Bacteriocin class II with double-glycine leader peptide	PF10439.9	cc1	Roholtiella [Tolypothrix] sp. PCC 7415	1887	3	35.05	yes	MASITVSNLRPIGSDLFMDSESFMDALTDNELAEINGGASPVLITTIATKWFVGAAVAGGIVGAIIYW	AVH79456_3	5.50E-09
790	WP_106300787	#2e86c1	Chamaesiphon	plantaricin: plantaricin C family lantibiotic	NF000539.0	cc1	Chamaesiphon polymorphus CCALA 037	2107	1	34.45	yes	MATISISDLSPVGLDLFSDFENYLDELSGDDLTKITGGSTPFCASIVATAISAVSGAIVSGIVGYTGRK	WP_106300787_1	9.90E-06
795	WP_027843178	#2e86c1	Mastigocoleus	plantaricin: plantaricin C family lantibiotic	NF000539.0	cc1	Mastigocoleus testarum BC008	1371	2	19.47	yes	MANIKVKEIQPAGIELFGDSESFMNELSGNELNNVIGGRTNTHAYTCTGARTCAKTK	WP_027843178_2	9.30E-07
802	WP_127078868	#2e86c1	Calothrix	Bacteriocin class II with double-glycine leader peptide	PF10439.9	cc1	Calothrix desertica PCC 7102	1304	1	27.2	yes	MATIKISNLRPTGAELFSDSESYMNELGDSELVSVNGGLTSPLCIVTAIRVGYAAARSSQQCAIGIAGAIGGAGRLVERLRKK	WP_127078868_1	0.0001
804	WP_096688632	#2e86c1	Calothrix	none	none	cc1	Calothrix sp. NIES-4071	1586	1	40.78	yes	MATIKISDLRPTGSELFSDSEGYMNDLGESEFDAIYGGLTPALIISAARLGYAGARSSQQCAMGIAGAAGAVERWFKRN	WP_096688632_1	none
806	WP_052808529	#FF0000	Streptomyces	none	none	cc1	Streptomyces cyaneogriseus subsp. noncyanogenus	29	1	43.33	yes	MDTHELIEGFDAYVEAEELNEDAMVDAPATTVPCTVASFATGYFSC	WP_052808529_1	none
809	WP_164394909	#FF0000	Streptomyces	none	none	cc1	Streptomyces sp. PRKS01-65	30	1	43.68	yes	MDTHELIEGFDAYVEAEELNEDAMVDAPATTLPCTVASFATGYFSC	WP_164394909_1	none
811	WP_068150862	#FF0000	Rhodococcus	Transferase family	PF02458.15	cc1	Rhodococcus corynebacterioides NBRC 14404	110	3	37.92	yes	MSDTHDILDGLSSYAAPDEIAETNAGDVPATTVPCSALASITTAELGC	WP_068150862_3	1.00E-05
814	PZN41733	#FF0000	Actinobacteria	none	none	cc1	Actinobacteria bacterium	393	3	44.53	yes	MQEMLTQELVTGYRSYAEAADLTVAAAVDAPATSPFCGFFASFAFSYITTNGPG	PZN41733_3	none
817	WP_170198719	#FF0000	Thermopolyspora	none	none	cc1	Thermopolyspora flexuosa	405	2	48.96	yes	MQAMLTEELVTGYRSYAEAADLNVGAAADVPASSPFCGFVASFMFSYVTTNGPGRNKAVV	WP_170198719_2	none
819	WP_091097544	#FF0000	Nonomuraea	Ubiquinol-cytochrome C reductase, UQCRX/QCR9 like	PF05365.12	cc1	Nonomuraea pusilla	266	2	38.48	yes	MHDVVRPSKTAAIMELTAGYDAYADASEFTLPAESEAPAATPVTILVLGGFATSYVVSGIARKAWDRTFIFGC	WP_091097544_2	1.00E-05
825	WP_139979956	#FF0000	Nocardioides	none	none	cc1	Nocardioides litoris	29	2	49.57	yes	MSKDELVGGFKEYSDAEEINNQVEEGDETPATTVPCSAIGSAILTNNFNC	WP_139979956_2	none
827	WP_015659226	#FF0000	Streptomyces	none	none	cc1	Streptomyces davaonensis JCM 4913	529	4	40.11	yes	MNTAEQLIAGYAAYTNAEEFGASAGPDAPAITITTVSSPECVYFSLSAVSGSIATTKSWGC	WP_015659226_4	none
830	WP_078760724	#FF0000	Marinactinospora	none	none	cc1	Marinactinospora thermotolerans DSM 45154	76	1	42.54	yes	MQKNLAIMELMEGYGAYTDVAELNISAAADAPASITVTTVSITTLPCIYAASAVSSAPCAAFSGGVAATVVNGC	WP_078760724_1	none
833	WP_159688203	#FF0000	Streptomyces	none	none	cc1	Streptomyces sp. Tu 2975	6725	1	42.98	yes	MQKNDTVDIMELVGGFEAYAEAAELNFEASADAPAITPTLTTIAYTKVSVASVSASVKWGC	WP_159688203_1	none
838	WP_068150862	#FF0000	Rhodococcus	none	none	cc1	Rhodococcus corynebacterioides NBRC 14404	330	2	41.65	yes	MSENTTHDILAGFDAYAAPEEITETNAADTPATTVPCSALASYTTAKLSC	WP_068150862_2	none
846	WP_060892878	#FF0000	Streptomyces	Amidase	PF01425.21	cc1	Streptomyces europaeiscabiei	907	4	42.19	yes	MNTAEQLIAGYTAYTNAEEFGAGATAENPAITPTVLSFIGGSSAGCGGAVSAISGAGVTATVNWGC	WP_060892878_4	1.40E-05
849	WP_071107270	#2e86c1	Moorea	Type-A lantibiotic	PF04604.13	cc1	Moorea producens JHB	2148	1	32.93	yes	MSSIKIAELRPAGSELFQDSESFLNELSDGQEMDMVLGGGRRSGFSFSFGSFRTINSTINTASLVSKSVVTTKSVVTVNTIAKGGKGKKGKKRH	WP_071107270_1	2.90E-06
850	WP_027845719	#2e86c1	Mastigocoleus	plantaricin: plantaricin C family lantibiotic	NF000539.0	cc1	Mastigocoleus testarum BC008	1050	2	19.47	yes	MANIKVKEIQPAGIELFGDSESFMNELSGNELNNVIGGRTNTHAYTCTGARTCAKTK	WP_027845719_2	9.30E-07
852	BBD63560	#2e86c1	Nostoc	none	none	cc1	Nostoc sp. HK-01	1583	2	35.84	yes	MAEIKITELRPIGSELFEDSETFLKELNDDEMTVTLGGGDSLLSISADTVDKSFISVGGDVSISK	BBD63560_2	none
855	WP_096580419	#2e86c1	Aulosira	none	none	cc1	Aulosira laxa NIES-50	2230	3	20.25	yes	MSNIKISEILPAGSELFQDSESFLNELTNEEILDTKGGRLPASLVTNSFISINSQINTIITANSNSINANTIGNVNTRIA	WP_096580419_3	none
858	WP_035150190	#2e86c1	Calothrix	plantaricin: plantaricin C family lantibiotic	NF000539.0	cc1	Calothrix sp. 336/3	3172	4	33.55	yes	MAFIKISELRPAGSELFQDSESFLNELGEQEMAIAGGGYNNTVASVISQASISVGISILTKSVVSQNNDYRYSFFKK	WP_035150190_4	1.90E-06
862	WP_053455886	#2e86c1	Hapalosiphon	none	none	cc1	Hapalosiphon sp. MRB220	1808	3	36.1	yes	MAEIKITELRPTGSELFEDSETFLKELNDDEMTVTLGDGDSLLSISLDTVDKSFISVGGDVSISK	WP_053455886_3	none
864	WP_006513161	#2e86c1	Leptolyngbya	none	none	cc1	Leptolyngbya sp. PCC 7375	757	2	20.83	yes	MSSIKIDSLSPAGLEMMQNSESFLTELGDAEDTIYGGRIYSDGRVAALSVLTTPACIASFIASNIVTNI	WP_006513161_2	none
866	WP_099068319	#2e86c1	Nostoc	none	none	cc1	Nostoc linckia z15	1449	2	31.23	yes	MATIKIHDLSPAGSDLFQDSESFLNELTDEELGVHGGRALASVSISVTVTVTYSWTWTWAL	WP_099068319_2	none
868	WP_096688632	#2e86c1	Calothrix	none	none	cc1	Calothrix sp. NIES-4071	2285	2	26.1	yes	MASIAIFDLRPAGSDLFSDSEGYMNELGDGEIGTIQGGFSSWKCVIWSARFSVVGSIVASLVVTTARAAN	WP_096688632_2	none
870	WP_015197629	#2e86c1	Calothrix	none	none	cc1	Calothrix sp. PCC 6303	2297	3	27.98	yes	MSNIKIAELVPVGSDLFTDSESFLNELTSDQIMDTNGGGYLASLVNSFISINSQINSLFSANSNSINANTVGNVNTRVR	WP_015197629_3	none
873	RCJ40850	#2e86c1	Nostoc	none	none	cc1	Nostoc minutum NIES-26	1583	1	35.21	yes	MAEIKITELRPTGSELFEDSETFLKELNDDEMTVTLGGGDSLLSISADTVDKSFISVGGDVSISK	RCJ40850_1	none
875	WP_169219633	#2e86c1	Brasilonema	none	none	cc1	Brasilonema sp. UFV-L1	3184	3	32.05	yes	MAIIKIDELRPTGAELFQDSESFLNELSDSEMSIFGGKDKDSDPTVLSIDTYSISIYSESVITNYYDVDIKIKVKNK	WP_169219633_3	none
877	RCJ40850	#2e86c1	Nostoc	none	none	cc1	Nostoc minutum NIES-26	1851	2	34.19	yes	MAEIKITELRPIGSELFEDSETFLKELNDDEMTVTLGGGDSLLSISADTVDKSFISVGGDVSISK	RCJ40850_2	none
879	AVH79535	#2e86c1	Synechocystis	Aph-1 protein	PF06105.12	cc1	Synechocystis sp. PCC 9413	693	2	30.68	yes	MATIAIRDLNPTGYSLFDGSESYLAELSSDDELDIYGGKLSSALGFSVGTVIGVTIVASLVYLLS	AVH79535_2	1.50E-06
881	WP_053455886	#2e86c1	Hapalosiphon	none	none	cc1	Hapalosiphon sp. MRB220	2093	1	39.31	yes	MAEIKITELRPTGSELFEDSETFLKELNDDEMTVTLGGGDSLLSISADTVDKSFISVGGDVSISK	WP_053455886_1	none
883	BBD63560	#2e86c1	Nostoc	none	none	cc1	Nostoc sp. HK-01	2387	4	30.46	yes	MAEIKITELRPTGSELFEDSETFLKELNDDEMTVTLGGGDSLLSISADTVDKSFISVGGDVSISK	BBD63560_4	none
886	WP_068385845	#2e86c1	Leptolyngbya	none	none	cc1	Leptolyngbya sp. NIES-3755	2600	2	31.45	yes	MASIKISELRPVGSELFQDSESFLNELNDRDLDIRGGGDVNISVLSQFTASIGISIKTASVVTVKTYNSPYSVFF	WP_068385845_2	none
891	WP_088242795	#2e86c1	Calothrix	none	none	cc1	Calothrix rhizosoleniae SC01	1989	2	32.27	yes	MANIKISELRPSGFDLFEDSESFLNDMNEMDSMSVHGGAGYGYSKYLQYGIGGFAINNIVSVYSKFSRVGSFY	WP_088242795_2	none
893	WP_011610106	#2e86c1	Trichodesmium	none	none	cc1	Trichodesmium erythraeum IMS101	1746	1	20.87	yes	MANINISDLSPAGADLFLDSESYLNDLTEGEMTNTLGGSRWWNRLKDWFRTR	WP_011610106_1	none
896	BBD63560	#2e86c1	Nostoc	none	none	cc1	Nostoc sp. HK-01	2119	3	35.79	yes	MAEIKITELRPTGSELFEDSETFLKELNDDEMTVTLGGGDSLLSISADTVDKSFISVGGDVSISK	BBD63560_3	none
899	WP_015189896	#2e86c1	Gloeocapsa	plantaricin: plantaricin C family lantibiotic	NF000539.0	cc1	Gloeocapsa sp. PCC 7428	2075	3	27.72	yes	MASIKIFELTPAGAELFQDNESFLNELNDQESLMISGGGGSDVNISVISQNSVSIGISIKTVSVVSQVKSYVFKKK	WP_015189896_3	1.10E-06
901	WP_068385845	#2e86c1	Leptolyngbya	none	none	cc1	Leptolyngbya sp. NIES-3755	2864	4	28.16	yes	MASIKISELRPVGSELFQDSESFLNELNDRDLDIRGGGDVNISVLSQYTASVGISIYTQSVVTVKTYNSPKTFFF	WP_068385845_4	none
903	WP_169219633	#2e86c1	Brasilonema	plantaricin: plantaricin C family lantibiotic	NF000539.0	cc1	Brasilonema sp. UFV-L1	2103	1	38.69	yes	MAIIKISELRPAGSELFQDSESYLNELNEQEVSMAIGGEGGSDVTSSVISINSQTVSLQTQSVITQVKTDVTKNVTW	WP_169219633_1	4.10E-06
906	WP_012597836	#2e86c1	Gloeothece	none	none	cc1	Gloeothece citriformis PCC 7424	993	3	29.52	yes	MSNISITDINPSGSSLFADVESYLNDLSEQDINDILGAGRVTIAWTLIDIQW	WP_012597836_3	none
908	WP_027845719	#2e86c1	Mastigocoleus	plantaricin: plantaricin C family lantibiotic	NF000539.0	cc1	Mastigocoleus testarum BC008	731	3	19.47	yes	MANIKVKEIQPAGIELFGDSESFMNELSGNELNNVIGGRTNTHAYTCTGARTCAKTK	WP_027845719_3	9.30E-07
910	WP_124970176	#2e86c1	Aphanothece	none	none	cc1	Aphanothece sacrum FPU1	1539	11	20.72	no	MAQIKINDLSLAGSDLFSDSESYLTELSHDSGMLNISGGTGVRIDINISGTSIRIVVQF	WP_124970176_11	none
912	WP_012597836	#2e86c1	Gloeothece	plantaricin: plantaricin C family lantibiotic	NF000539.0	cc1	Gloeothece citriformis PCC 7424	305	6	23.93	yes	MSNISITDINPSGSSLFADVESYLNDLSEQDINNILGGGKVSIAWSLICVEW	WP_012597836_6	1.30E-06
914	WP_012597836	#2e86c1	Gloeothece	plantaricin: plantaricin C family lantibiotic	NF000539.0	cc1	Gloeothece citriformis PCC 7424	535	7	22.41	yes	MSNISITDINPSGSSLFADVESYLNDLSEQDINNILGGGKVSIAWSLICVEW	WP_012597836_7	1.30E-06
916	WP_163670238	#2e86c1	Leptolyngbyaceae	none	none	cc1	Leptolyngbyaceae cyanobacterium CCMR0082	1065	2	18.96	yes	MSSIKIVSLSPAGLEMMQSPESFLTELGDAEDAIYGGKVYSDSRVVALSVFTTPACIASVIASNIVTNTD	WP_163670238_2	none
918	WP_105222244	#2e86c1	Gloeocapsopsis	plantaricin: plantaricin C family lantibiotic	NF000539.0	cc1	Gloeocapsopsis sp. AAB1 = 1H9	1906	3	27.38	yes	MSCLKISDLSVTGLELFQDAENFLNELSDREIENITGGWFSFITDDFMPTTSNLVLETVVKTRVVSAITKSVRVKTKGVKNYGISHTHKTIISIRC	WP_105222244_3	8.30E-06
921	WP_106240815	#2e86c1	Pleurocapsa	plantaricin: plantaricin C family lantibiotic	NF000539.0	cc1	Pleurocapsa sp. CCALA 161	1797	1	44.22	yes	MAEIKLSELRPAGSELLQDSENFLNELSDREIENVVGGDTIASVASQNSISVGTVNSITDVGQTQTLVTF	WP_106240815_1	9.40E-08
926	WP_073643028	#2e86c1	Nostoc	plantaricin: plantaricin C family lantibiotic	NF000539.0	cc1	Nostoc calcicola FACHB-389	1447	3	30.76	yes	MSNIAISNLRPAGADLFQDSENFLHELTEQEIADVLGGARVIILFTALCFEW	WP_073643028_3	4.50E-06
928	WP_015197629	#2e86c1	Calothrix	none	none	cc1	Calothrix sp. PCC 6303	2762	1	41.26	yes	MASIKISELRPSGSELFQDSESFLNELNTQEMEIVGGRAYFFSKAGGFGSIAVSISALSANGNTVNANTLGNANTVIL	WP_015197629_1	none
930	WP_053455886	#2e86c1	Hapalosiphon	none	none	cc1	Hapalosiphon sp. MRB220	2378	2	37.43	yes	MAEIKITELRPTGSELFEDSETFLKELNDDEMTVTLGGGDSLLSISADTVDKSFISVGGDVSISK	WP_053455886_2	none
932	WP_027843178	#2e86c1	Mastigocoleus	plantaricin: plantaricin C family lantibiotic	NF000539.0	cc1	Mastigocoleus testarum BC008	2009	1	19.73	yes	MANIKVKEIQPAGIELFGDSESFMNELSGNELNNVIGGRTNTHAYTCTGARTCAKTK	WP_027843178_1	9.30E-07
935	WP_017748579	#2e86c1	Scytonema	plantaricin: plantaricin C family lantibiotic	NF000539.0	cc1	Scytonema hofmannii PCC 7110	2110	1	35.7	yes	MASIKIVELRPAGSELFQDSESFLNELNERDMLGLEGGFAFNGTLGISITAQTVVGNTANANTFGNVNTVIAY	WP_017748579_1	1.20E-06
939	OBQ01900	#2e86c1	Anabaena	none	none	cc1	Anabaena sp. AL09	1602	2	24.3	yes	MANIVISELRPAGSDLFMDSESYLTDLTDNELHMTKGGSTWFCAGVIVGMIITKL	OBQ01900_2	none
942	WP_071107270	#2e86c1	Moorea	none	none	cc1	Moorea producens JHB	2307	2	8.74	no	MSNIKISELRSAGSELFHDSESFLNELTDEQEIDSVLGGFRIHPFSKRTITFPKTFPSKTFPIHPFPTCFPRTIRTIGKPIKAH	WP_071107270_2	none
947	WP_015210601	#2e86c1	Cylindrospermum	none	none	cc1	Cylindrospermum stagnale PCC 7417	2031	2	26.5	yes	MATIKLSELQIAGSELFQDSESFINELNDVASVSVHGGGHDSGFSDYGHFGADFGKKYLEYLVNGYAVSTIKEIAKSYSESDDSYSNGYY	WP_015210601_2	none
952	WP_087542717	#2e86c1	Nostocales	plantaricin: plantaricin C family lantibiotic	NF000539.0	cc1	Nostocales cyanobacterium HT-58-2	3380	5	31.87	yes	MAIIKISELRPAGSELFQDSESFLNELTEKEMSGLEGGLFFAFNGTFGVSVSAQTVNGNTVNANTLGNINTAVIA	WP_087542717_5	4.40E-06
954	WP_099068319	#2e86c1	Nostoc	plantaricin: plantaricin C family lantibiotic	NF000539.0	cc1	Nostoc linckia z15	109	7	19.69	yes	MANIKLHDLSPAGSELFEDSESFLNELNAEELNNVNGGLLGITLTITVTITITITL	WP_099068319_7	1.20E-05
956	BBD63560	#2e86c1	Nostoc	none	none	cc1	Nostoc sp. HK-01	1851	1	37.12	yes	MAEIKITELRPTGSELFEDSETFLKELNDDEMTVTLGGGDSLVSISVDTVDKSFISVGGDVSISK	BBD63560_1	none
971	WP_138499068	#2e86c1	Nostoc	none	none	cc1	Nostoc sp. PA-18-2419	3175	4	40.58	yes	MASIALSQLNTTGSELFQDSESFLNDLNNVDSITIYGGGSDVSSVAEGLDPLLAYGIKGQEFGLLAFGASLTAHIVKSFSDATNYY	WP_138499068_4	none
1000	WP_138499068	#2e86c1	Nostoc	Mediator complex subunit 25 von Willebrand factor type A	PF11265.8	cc1	Nostoc sp. PA-18-2419	2424	1	44.0	yes	MASIALSQLNTTGSELFQDSESFLNDLNNVDSITIYGGGSDVSSVAEGLDPLLAYGIKGQEFGLLAFGASLTAHIVKSFSDGTHYF	WP_138499068_1	1.30E-05
1008	WP_138499068	#2e86c1	Nostoc	Mediator complex subunit 25 von Willebrand factor type A	PF11265.8	cc1	Nostoc sp. PA-18-2419	3550	5	38.56	yes	MANIALSQLNTTGSELFQDSESFLNDLNNVDSITIYGGGSDVSNVAEGLDPLLAYGVKGQEFGLLAFGASLTAHIVKSFSDATNYF	WP_138499068_5	1.20E-05
1022	WP_044449859	#2e86c1	Mastigocladus	none	none	cc1	Mastigocladus laminosus UU774	1603	3	27.12	yes	MASITISDLRPVSSEDSKSFLYDLLDTNSILVHGGTSYGISEYQKALEYALVGYAIHNIVSLVKIFLAPRNTSVSLSPK	WP_044449859_3	none
1030	AFY52807	#2e86c1	Rivularia	Type-A lantibiotic	PF04604.13	cc1	Rivularia sp. PCC 7116	2393	3	35.91	yes	MAKLQINDVKLDGAELFNDSETFLNELQDGEIEQVVGGLTRVAPEHVTTTAYFPDKPYRTVYIPKEPIHPRLPVHPKEPVHPRQPIKFPYFPHPQTPVIL	AFY52807_3	3.80E-06
1031	AFY52807	#2e86c1	Rivularia	Type-A lantibiotic	PF04604.13	cc1	Rivularia sp. PCC 7116	1441	4	34.24	yes	MAKIQINDVKLGDTELLNDAETFLNELENGEMEQVIGGKTISLDDYEFYKNKKFDFPKRLHPIKPIDFPEPNLPKLPKHPGVIKIPYEPVIL	AFY52807_4	5.70E-07
1034	WP_169219633	#2e86c1	Brasilonema	none	none	cc1	Brasilonema sp. UFV-L1	1478	2	37.78	yes	MSSIKISQLRRPVGSELFEDTESFLHELTSEEIREIKGGLIVSVVSESMSIYTQSQIVIPVNDRAIFAEDISLDNKTAALLLEQNIKFI	WP_169219633_2	none
1044	ANI93503	#FF0000	Dietzia	none	none	cc1	Dietzia timorensis	902	3	28.16	yes	MHNDILDGFNTYATPAELADTNAADTPATTVPCSALASYGTAKLGC	ANI93503_3	none
1047	ANI93503	#FF0000	Dietzia	none	none	cc1	Dietzia timorensis	490	1	28.16	yes	MHNDILDGFNTYATPAELADTNAADTPATTVPCSALASYGTAKLGC	ANI93503_1	none
1049	ANI93503	#FF0000	Dietzia	none	none	cc1	Dietzia timorensis	1108	6	23.01	yes	MHNDILDGFNTYATPAELADTNAADTPATTVPCSALASITTAELGC	ANI93503_6	none
1053	WP_125821548	#FF0000	Streptomyces	none	none	cc1	Streptomyces sp. W1SF4	136	1	36.93	yes	MDSMDLIAGYAAYTTPEELAASEATDAPAITTTVTSSEICITITVGWGC	WP_125821548_1	none
1055	WP_051840628	#FF0000	Streptomyces	none	none	cc1	Streptomyces lavendulae subsp. lavendulae	176	1	37.48	yes	MDSMDLIAGYAAYTTPEELAASEATDAPAITTTVTSSEICITITVGWGC	WP_051840628_1	none
1057	WP_128433866	#FF0000	Streptomyces	none	none	cc1	Streptomyces cyaneus	5960	2	48.26	yes	MNTTENLIAGYTAYTSAQEIEATHAEEAPGATPSVLSFIATSGWACGAGIGTSIGVTAAKGC	WP_128433866_2	none
1058	WP_153461219	#FF0000	Streptomyces	none	none	cc1	Streptomyces kaniharaensis	3986	4	42.28	no	MNNADQLIAGYTAYTDAEEVGAGATAEAPATTPALSVIAVSTAACGAAVGSAIGGSIAGTVNWGC	WP_153461219_4	none
1061	WP_139627778	#FF0000	Nonomuraea	none	none	cc1	Nonomuraea sp. WYY166	6337	2	39.43	yes	MTTTDQLMAGYATYATPQEVGAAAAGEAPEISPISVAVLSFIGQSSYACGAGISMAVSFTIGKGC	WP_139627778_2	none
1064	WP_017198207	#FF0000	Arthrobacter	Two-component Enterococcus faecalis cytolysin (EFC)	PF16934.5	cc1	Arthrobacter sp. M2012083	531	3	10.4	yes	MNAQSQATGNLMELVSGYKQYAAADELEFTADSDAPAATPTLALWSIATSKLFVSGAVSGAGAGVSWRLGC	WP_017198207_3	1.10E-05
1067	WP_068210304	#FF0000	Rathayibacter	Na+/Pi-cotransporter	PF02690.15	cc1	Rathayibacter tanaceti	80	3	29.55	yes	MSSTTAESLIAGYRSYAVQAPDLSGTTEAAPAATPGVLSFIAASTVACGTAISVVGGSVVGTTVNAGC	WP_068210304_3	4.20E-06
1069	WP_155862233	#FF0000	Corynebacterium	none	none	cc1	Corynebacterium durum F0235	2390	4	21.3	yes	MSTTSNDQRSRDLVSGYDIYTSKDELFTMSVEDAPAATPVLSFIGYSSYACGGGISFIATAGATTIAKGC	WP_155862233_4	none
1071	WP_141936425	#FF0000	Microbacterium	none	none	cc1	Microbacterium sp. SLBN-154	225	3	46.79	yes	MSHTQSLVAGFSAYAQASELSALTGEAAPAATPSTVSVFLTASSPECVAFSIGASAGAVTSTGVTITAGC	WP_141936425_3	none
1073	WP_054237388	#FF0000	Actinobacteria	none	none	cc1	Actinobacteria bacterium OK006	759	3	40.46	yes	MNTADQLIAGYTAYTDAADFGASAAGEAPATTPSIITASSPECGAFSISAASGILTSVSITHGAGC	WP_054237388_3	none
1075	WP_051851944	#FF0000	Streptomyces	none	none	cc1	Streptomyces sp. NRRL F-5650	6201	3	50.98	yes	MNTSDNLMAGYATYTSADEIAATLDGGAPEISPVSLSIAVSITESSYACGAGISLSVGWTVGKGC	WP_051851944_3	none
1077	WP_068210304	#FF0000	Rathayibacter	none	none	cc1	Rathayibacter tanaceti	336	1	41.28	yes	MTSNQTLIAGFSSYASAEELVSTSLESAPGATPSPISAVSVFVTASSPECALVSVGVTAGGTTTTLAAGC	WP_068210304_1	none
1081	WP_141936425	#FF0000	Microbacterium	none	none	cc1	Microbacterium sp. SLBN-154	1	2	47.64	yes	MDAATQSLIAGYRSYAGAADLVEMTEAAPAATPGILSFIAASSAACGTATSIVSVGGTSFTVTYGC	WP_141936425_2	none
1083	WP_071383933	#FF0000	Streptomyces	none	none	cc1	Streptomyces monashensis	761	2	42.7	yes	MNTADQLIAGYTAYTSAEEFGVTAEGDAPATTPSILVSIDMSSAACGATIGYSISKTVNGGC	WP_071383933_2	none
1085	WP_164312175	#FF0000	Streptomyces	Pre-toxin domain with VENN motif	PF04829.13	cc1	Streptomyces sp. SID12501	1737	3	38.68	yes	MNEKLIAGYAAYTTADEYGTAATGEAPASIESISWAVSGAAVGASISLTVQNGC	WP_164312175_3	0.0014
1087	AGP61345	#FF0000	Streptomyces	none	none	cc1	Streptomyces rapamycinicus NRRL 5491	5322	4	35.36	yes	MNTETLFEGYSTYTDADKLAASSQADEAPATITLSVATVILTIQQGC	AGP61345_4	none
1090	WP_083744359	#FF0000	Microbispora	Nucleoporin FG repeated region	PF15967.5	cc1	Microbispora rosea	7438	2	59.86	yes	MNNLADELISGYTAYTSAEEVGVTTAADAPATTPTILSFIGASSLACGATIGSIVTGTVKIGC	WP_083744359_2	5.10E-06
1093	WP_030169499	#FF0000	Kitasatospora	none	none	cc1	Kitasatospora arboriphila	98	4	25.1	yes	MSEAVTKSLVAGYRSYAAAPELTEMSEAAPSATPGILSFIGTSSTACGTAVSVISSGGVGATITWGC	WP_030169499_4	none
1096	WP_153461219	#FF0000	Streptomyces	none	none	cc1	Streptomyces kaniharaensis	3692	3	44.19	no	MNTTDQLIAGYTAYTDAQEVGASASAEAPATTPTIVTASSPECGAFTVSVVSGAVGATANWGC	WP_153461219_3	none
1107	BAY08128	#2e86c1	Calothrix	Serglycin	PF04360.12	cc1	Calothrix sp. NIES-2098	1852	2	45.2	yes	MANIKVSELRPAGSEFFQDSESFLNDLNDMDTTSVHGGEGTNLVPYLQFGAKLLEYSVVGLGITTITSLVGTFSSTGTGIGSGSGSGGSTGV	BAY08128_2	0.00027
1112	WP_015216084	#2e86c1	Anabaena	none	none	cc1	Anabaena cylindrica PCC 7122	2808	4	34.51	yes	MASIKISDLRPSGLDLFVDSESFLNDLNDSDLAATNGGATPAGVALLGAAWLGYSIGKELARFF	WP_015216084_4	none
1120	WP_086689015	#2e86c1	Nostoc	none	none	cc1	Nostoc sp. T09	1500	2	22.86	yes	MTRIVIFDLHHSNSRKLENSESFLDDLTEIDSMSVHGGEGYNFNEFLNLGVKVLEYALVGFAIYNIVSLVQLFLAPQQRQIGTYPPTTPL	WP_086689015_2	none
1125	BAY08128	#2e86c1	Calothrix	Serglycin	PF04360.12	cc1	Calothrix sp. NIES-2098	2289	1	54.45	yes	MANIKVSELSPAGSELFQDSESFLSDLNDIDTTSVHGGEGANLVPYLQFGAKLLEYSVVGLGITTIASLVGTFSSTGTGIGGGGSGSGGGSGSGSGSITIG	BAY08128_1	0.00038
1130	WP_168357543	#2e86c1	Dolichospermum	none	none	cc1	Dolichospermum planctonicum UHCC 0167	1802	1	35.2	yes	MASITLSQLNVTGSELFQDSESYLNDLNDASSVAVHGGYYGGGFGEYGDFGVKYLEYLVNGYAITSIKQIAKSFSHNPSASASTGPW	WP_168357543_1	none
1136	WP_015127932	#2e86c1	Calothrix	none	none	cc1	Calothrix sp. PCC 7507	1944	4	38.65	yes	MAIIALSELHTTGSELFQDSESFLNDLNNTDSISVYGGTSDVSDTADGVTPILEYGIKGQEFGLLAFGANLTAHILKSFSEGGTFY	WP_015127932_4	none
1141	WP_027402982	#2e86c1	Aphanizomenon	none	none	cc1	Aphanizomenon flos-aquae NIES-81	2145	2	39.76	yes	MASIKLSQLQANGSELFQDSESFLNEMNDVDTISIQGGSGSGIHDLVHYSIKGKEFVLLGFAIDSAVSLAKSFSHSHSHSNHYSN	WP_027402982_2	none
1144	WP_017314970	#2e86c1	Mastigocladopsis	plantaricin: plantaricin C family lantibiotic	NF000539.0	cc1	Mastigocladopsis repens PCC 10914	1643	3	33.68	yes	MANIKISELRPAGAELFQDSESFLNELNDQEMSVFGGGDGDVVVTIDSNVDSVDIKTKDISVSIG	WP_017314970_3	3.70E-06
1150	RCJ40334	#2e86c1	Nostoc	Domain of unknown function (DUF5006)	PF16397.5	cc1	Nostoc punctiforme NIES-2108	1323	5	20.86	yes	MSSITVSDLHSTDISLFGNSESFLKDLSYKDSNEVYGGSAAYALGYAIGWLIGHL	RCJ40334_5	1.10E-05
1154	WP_017314970	#2e86c1	Mastigocladopsis	plantaricin: plantaricin C family lantibiotic	NF000539.0	cc1	Mastigocladopsis repens PCC 10914	1894	4	32.86	yes	MANIKISELRPAGAELFQDSESFLNELNDQEMSVFGGGDGDVVVTVDSNVDSVDIKTKDISVSIG	WP_017314970_4	1.80E-06
1166	WP_167725682	#2e86c1	Tolypothrix	none	none	cc1	Tolypothrix sp. PCC 7910	1476	4	17.81	yes	MNRIVIFDLHQSGSNEIGNSESFIEDVTEIDSMCIHGGEGYAFSEFLNFGVKVLEYALIGFAISSIVSLVQMFLSPRQNQNNSLPTIYPPIS	WP_167725682_4	none
1168	WP_104296401	#FF0000	Rathayibacter	none	none	cc1	Rathayibacter toxicus	1130	5	8.35	yes	MNELMSGYSRYTSAAAYGSSLAGDAPATTSPACAVGTIVILTVGVTC	WP_104296401_5	none
1169	WP_142936832	#FF0000	Arthrobacter	none	none	cc1	Arthrobacter sp. TS-15	378	1	31.36	yes	MTHAITNIPQADLTDLARAHSTFTAADELGGDAATDAPATTPFCAGVIIGATLTMGC	WP_142936832_1	none
1171	SLE69095	#FF0000	Mycobacteroides	GAGA factor	PF09237.11	cc1	Mycobacteroides abscessus subsp. bolletii	464	1	22.52	yes	MAQNVNLMELADAHTAFATSAELGSDAASDAPATTPFCAGVVIGLTLTAGC	SLE69095_1	1.20E-05
1173	SLE69095	#FF0000	Mycobacteroides	GAGA factor	PF09237.11	cc1	Mycobacteroides abscessus subsp. bolletii	92	3	15.49	yes	MAQNVNLMELADAHTAFTTSAELGSDAASDAPATTPVCVGIIVGATLGAGC	SLE69095_3	4.60E-06
1175	WP_166841243	#FF0000	Paenarthrobacter	none	none	cc1	Paenarthrobacter sp. MSM-2-10-13	379	1	31.36	yes	MTHAITNIPQADLTDLARAHSTFTAADELGGDAATDAPATTPFCAGVIIGATLTMGC	WP_166841243_1	none
1177	WP_091465037	#FF0000	Paenarthrobacter	none	none	cc1	Paenarthrobacter nitroguajacolicus	393	2	24.7	yes	MTNTITDIPQADLTDLARAHSTFTAADELGGDAATDAPATSPFCAGVIIGATLTMGC	WP_091465037_2	none
1180	WP_133616643	#FF0000	Leucobacter	none	none	cc1	Leucobacter luti	1132	3	12.94	yes	MSLMTNFTEYTTAQAFATSQMDAAPATTTPVCATITIVALTASMWC	WP_133616643_3	none
1183	AGP61345	#FF0000	Streptomyces	none	none	cc1	Streptomyces rapamycinicus NRRL 5491	2524	5	25.69	yes	MTHTADLMAGYTAYTSAAELGAAVDEAPAYTPTLSITGTCMTPILTLVNGC	AGP61345_5	none
1185	AOX46105	#FF0000	Microbacterium	none	none	cc1	Microbacterium sp. BH-3-3-3	3741	2	43.47	yes	MTMLNERLIAGYSTFTAADELMNSTATAPAVSPTVSIVGSAVTIGATSFASGFTVAWTVDTGC	AOX46105_2	none
1187	WP_062071413	#FF0000	Arthrobacter	none	none	cc1	Arthrobacter sp. EpRS71	376	1	30.12	yes	MNNAVTNIPQSDLTDLARAHSTFTAADELGGDAATDAPATTPFCAGVIIGATLTMGC	WP_062071413_1	none
1190	AFR27446	#FF0000	Arthrobacter	none	none	cc1	Arthrobacter sp. Rue61a	402	2	26.96	yes	MTHAITNIPQADLADLARAHSTFTAADELGGDAATDAPATTPFCAGVIIGATLTMGC	AFR27446_2	none
1192	WP_073644071	#2e86c1	Nostoc	none	none	cc1	Nostoc calcicola FACHB-389	3140	1	33.89	yes	MANITLSELYVSGSELFEGVESFLNDLSDTDSISGGNYVGFSDISTLTKLAEAYVDTYAIGHVTFVAKSYSNGTYY	WP_073644071_1	none
1232	WP_096664869	#2e86c1	Dolichospermum	none	none	cc1	Dolichospermum compactum NIES-806	1676	2	39.42	yes	MASITLSQLNVTGSELFQDSESYLNDLNDAASVSINGGGSGFSDFGVYGDFGVKYLEFLVDGYAIASIKHIAKSFSNDSHTGGGYGY	WP_096664869_2	none
1290	WP_086760950	#2e86c1	Nostoc	Legionella pneumophila major outer membrane protein precursor	PF05150.12	cc1	Nostoc sp. RF31YmG	1323	12	20.15	yes	MSTIKIENIAPKGSELFLDRESYLDRLSESDILTIQGGYLTINYTTVLTTKTIVTTPYTIIGTGPIIQPTPPVFIA	WP_086760950_12	1.30E-05
1292	TVP63782	#2e86c1	Nodularia	none	none	cc1	Nodularia sp. (in: Bacteria)	1654	5	30.78	yes	MSTINIQDIKVAGSDLFFDEETYLNELSHDEIGAAKGGITPTVAGTIALSSAFVLSYNLSKIGTELKNKFF	TVP63782_5	none
1295	WP_171977306	#2e86c1	Brasilonema	none	none	cc1	Brasilonema sennae CENA114	1734	3	15.62	yes	MATICIRDLAGFDLMSDEESYLNEFTEEDFPAIKGGITPFITTVVAFSASAGASYAISRLFK	WP_171977306_3	none
1304	WP_106300787	#2e86c1	Chamaesiphon	none	none	cc1	Chamaesiphon polymorphus CCALA 037	1821	3	27.29	yes	MATISIGNLNSLGGDLLIDEESYLDNLSDDLTVSVKGGWTPTVTASPASPQISAASVATFIASAALTYNITRSFGK	WP_106300787_3	none
1306	BAZ42602	#2e86c1	Calothrix	BlpC_Streptocco: quorum-sensing system pheromone BlpC	NF033215.1	cc1	Calothrix sp. NIES-4101	1226	5	17.84	yes	MATISISNLRNSGVELFLDSESYLHELTETELNTTKGGSPFIIFSPTLISPLTPILF	BAZ42602_5	1.30E-05
1313	AVH79535	#2e86c1	Synechocystis	none	none	cc1	Synechocystis sp. PCC 9413	1293	8	16.11	yes	MSKINISNLDTSGYSLLLDTESYLWEIDSLSALDTGVIGGTGHLTASPIAVTPKLTPLFWIC	AVH79535_8	none
1327	WP_019496925	#2e86c1	Calothrix	none	none	cc1	Calothrix sp. PCC 7103	449	3	14.51	yes	MAAISISDLRISGADLFVDAETYLHELTDTELGMTKGGCFPIPTFRPTTNTITTITITSIVSKLV	WP_019496925_3	none
1331	WP_019501955	#2e86c1	Pseudanabaena	none	none	cc1	Pseudanabaena sp. PCC 6802	6610	12	17.35	yes	MANISIPNLSPAGSDLFVDSESYMNDVSDRDLGHVAGGGSAIPPDTIPPVTLTTGDYNSTAIIE	WP_019501955_12	none
1344	WP_044206131	#2e86c1	Coleofasciculus	Membrane-bound lytic murein transglycosylase C, N-terminal domain	PF11873.8	cc1	Coleofasciculus chthonoplastes PCC 7420	2823	2	22.28	yes	MANIAISNLSPSGFDLFDDSESYLQELSEQELSFQGGVMITPTITTTITTTTLTPTITTTMTLPLRPR	WP_044206131_2	2.70E-05
1351	AVH79607	#2e86c1	Nostoc	Poly-beta-hydroxybutyrate polymerase N terminal	PF12551.8	cc1	Nostoc sp. PCC 9205	1686	5	17.97	yes	MASITVSNLNVAGLDLFNDQESYLSEVTDDELGLTHGGISPTFIAFGKGVLVATRASSGYCVRGLSMASGVSAYFIFR	AVH79607_5	0.015
1358	WP_155358788	#FF0000	Acrocarpospora	UL2 protein	PF08196.11	cc1	Acrocarpospora macrocephala	44	3	27.1	yes	MPTDLLIEGADAYTSLAEIAAAHADSVAAVPTPISITWSICTLTIEGGC	WP_155358788_3	2.00E-05
1362	WP_086829041	#FF0000	Allokutzneria	Ash protein family	PF10554.9	cc1	Allokutzneria sp. NRRL B-24872	56	1	61.93	yes	MELVTTNTATLVASEQLMAGYAEYTDATELTMVAGEGAPMGFTPAVVTVTIPWTTISVTTGTIVAGCGNAND	WP_086829041_1	1.80E-06
1364	WP_164312175	#FF0000	Streptomyces	none	none	cc1	Streptomyces sp. SID12501	1527	2	43.07	yes	MNEKLIAGYAAYTTADEYGTAATGEAPASVETVGISIASVALSIMSVVDKC	WP_164312175_2	none
1366	WP_059262025	#FF0000	Streptomyces	none	none	cc1	Streptomyces corchorusii	138	2	38.74	yes	MMNETAELATGFDAYTDLEELAAAVEASTEAKTPGFSITPTFSLTGQH	WP_059262025_2	none
1369	WP_073726342	#FF0000	Streptomyces	none	none	cc1	Streptomyces sp. CB02414	6774	1	53.37	yes	MQNDIEIMELVGGFEAYTEAAELNMEASVEAPAATPTATIVYTKFSVASVTLTAKKGC	WP_073726342_1	none
1371	WP_054237388	#FF0000	Actinobacteria	none	none	cc1	Actinobacteria bacterium OK006	410	4	29.68	yes	MTTRSDRIPKGNHVSTADQLIAGYTAYTDAADFGASAGGQAPATTPTILSVIAESTPACGGAVSAVSASAVGFTAHWGC	WP_054237388_4	none
1385	WP_086769105	#2e86c1	Nostoc	Type-A lantibiotic	PF04604.13	cc1	Nostoc sp. 106C	3442	2	37.04	yes	MAVIKISELRPAGSELFQDSESFLNELSENREVDQVLGGLNTIATANANTLNANTFTNVNTIRSIVVTA	WP_086769105_2	1.60E-06
1388	TAE59458	#2e86c1	Nostocales	none	none	cc1	Nostocales cyanobacterium	1590	2	38.27	yes	MANIQLNELNIAGSELFQDTESFLNEMNDSDGILVKGGSGSYLPDLLDYSIKSYEFALIGFAIDSVVSLAKSFSKHD	TAE59458_2	none
1395	WP_089091039	#2e86c1	Nodularia	none	none	cc1	Nodularia sp. NIES-3585	2114	5	27.96	yes	MANITLSQLYATGSELFHDSESFLHELSDVDSSSKGQYNVVGGIFTLTVLAGTFVGTYGIGHATHVAKSYSRPHYRY	WP_089091039_5	none
1438	WP_012409362	#2e86c1	Nostoc	Mediator complex subunit 25 von Willebrand factor type A	PF11265.8	cc1	Nostoc punctiforme PCC 73102	4247	6	37.52	yes	MASIALSQLNTTGSELFQDSESFLSDLNNVDTITIYGGGNEGEVSNVAEGIEPLLGYGTKGLEFGLMGFGASLTAHIVKSFSDTDTDL	WP_012409362_6	1.40E-05
1449	WP_026100063	#2e86c1	Fortiea	none	none	cc1	Fortiea contorta PCC 7126	3905	3	46.56	yes	MAFIALNELHTTGAGLFQDSESYLTELNNLDDAVHGGLLAGAATTASAGATATILGIVTKGYEFGVYTVGIEGISYLVKSFSYGGGYSSAV	WP_026100063_3	none
1464	WP_012409362	#2e86c1	Nostoc	none	none	cc1	Nostoc punctiforme PCC 73102	1979	8	28.7	yes	MASIALSQLNTTGSELFQDSESFLSDLNNVDSITVYGGGYEISSVAHGIEPLLAYGIKGQEFALLGFGASLTAHIVKSFSDTDTHY	WP_012409362_8	none
1474	WP_012409362	#2e86c1	Nostoc	none	none	cc1	Nostoc punctiforme PCC 73102	3867	5	40.39	yes	MASIALSQLNTTGSELFQDSESFLSDLNNVDTITIYGGGDEGDVSNVSEGIEPLLAYGIKGQEFALLGFGASLTAHIVKSFSDTDTNL	WP_012409362_5	none
1485	WP_015113151	#2e86c1	Nostoc	none	none	cc1	Nostoc sp. PCC 7107	1537	6	24.75	yes	MAKIIIDELSFSDLESYLTEVNDLDSLSIYGGESELQQILDFAYNLLNFVLSAYAIYNISLITKSFKITRNKTTRSVFSLF	WP_015113151_6	none
1487	WP_096559014	#2e86c1	Nostoc	none	none	cc1	Nostoc sp. NIES-4103	1430	7	25.19	yes	MIVLGIDLMANIIISELKLVDSENYLTEINEMDSMFVYGGDNYAFSQVINFTMNFLKFVVTIYAIHSITLLAKSFNTNSSNAYLPSIYF	WP_096559014_7	none
1489	WP_138499068	#2e86c1	Nostoc	none	none	cc1	Nostoc sp. PA-18-2419	1412	8	16.79	yes	MSKIKISDLYIADSESFLIDVSNFDYISIYGSVDDALSQIFNYGEKSLNLALLAFSIYEIAQLAKSFNTQ	WP_138499068_8	none
1491	RCJ30949	#2e86c1	Nostoc	Calcineurin-like phosphoesterase superfamily domain	PF12850.7	cc1	Nostoc minutum NIES-26	1401	9	23.38	yes	MAKIIISDLHTADSETYLTVMNDIDSMFVYGGDDYALSELINFAYKFLDFVVAIFGIYNIALLAKSFNASESNSSLSIYL	RCJ30949_9	8.90E-06
1494	WP_012409362	#2e86c1	Nostoc	none	none	cc1	Nostoc punctiforme PCC 73102	1464	9	22.04	yes	MFLGFESMPKITISDLHTDDSEGFLIDISNLDYISIYAGADDDLAQILNYGLKNLNFALLAFAIHEVAELAESFNTQ	WP_012409362_9	none
1501	CEJ45116	#2e86c1	Chrysosporum	none	none	cc1	Chrysosporum ovalisporum	1407	6	17.3	yes	MAKIIISQLHPIDLESFLLEITDMYSLSVYGSEDYAYHYGYYQLLNFTYHLVDFVLSTFAIYSIVSLAKSFVATECGYSSHLFVPVSLFTQQLT	CEJ45116_6	none
1506	TVP62740	#2e86c1	Nodularia	none	none	cc1	Nodularia sp. (in: Bacteria)	1435	4	24.17	yes	MAGIIISELHPTDLESFLIEITDMSSISVYGGNQYAIDYAFHQMLNFTYRLMDFMLSVFAIYSITSLVQSFMTTTEFNFVPEHFFPF	TVP62740_4	none
1509	TAG67909	#2e86c1	Oscillatoriales	plantaricin: plantaricin C family lantibiotic	NF000539.0	cc1	Oscillatoriales cyanobacterium	2282	1	27.2	yes	MATIKIADLTPIGSEFFTDSESYLNELTDDELNMTKGGSSIWCSIAITVITYYTFKPVYVY	TAG67909_1	5.50E-06
1512	AVH79535	#2e86c1	Synechocystis	none	none	cc1	Synechocystis sp. PCC 9413	1538	1	31.8	yes	MSTIKIADLHFSGSDLLQDNESYLNELDNLSLDASQIQGGLTPVPVVSIVTATVITAISVVTRIAKEINEIVNPCPPPPCEF	AVH79535_1	none
1516	WP_171977306	#2e86c1	Brasilonema	Bacteriocin class II with double-glycine leader peptide	PF10439.9	cc1	Brasilonema sennae CENA114	2006	1	38.99	yes	MASINISDIRPAGSELFVDSESFMNDLADQELSATKGGLSPIVIWGVAIASEYVIGAMVSGAAVGAYSALKKK	WP_171977306_1	2.50E-07
1520	RCJ19623	#2e86c1	Nostoc	none	none	cc1	Nostoc minutum NIES-26	1894	2	29.65	yes	MAHIAISNLHPAGYELFSDSEQFINDLSEEELNIQGGLISRPWFSPYCRPIPTPRPIYPPIWRLTVQIEKRG	RCJ19623_2	none
1522	WP_096688632	#2e86c1	Calothrix	Oligosaccharyltransferase subunit 5	PF05251.12	cc1	Calothrix sp. NIES-4071	1130	7	14.14	yes	MASIKIFNLYPAGSELFKDSENFMTELVDSELGSINGGIGIVYNSPWCRPTIYSPRCKPSLPRSIATTLPKAV	WP_096688632_7	3.30E-06
1524	WP_099700413	#2e86c1	Chroococcales	none	none	cc1	Chroococcales cyanobacterium IPPAS B-1203	1242	1	35.67	yes	MACIKISELQPAGNELFQDKESYLDELNEKETLFIIGGKKKGGDLDISVLTVYTESIGISLQTFSVVTQVKKIKIKIKY	WP_099700413_1	none
1529	WP_163927072	#2e86c1	Nostoc	none	none	cc1	Nostoc sp. UIC 10630	1926	2	23.8	yes	MATINISDLHPTGSDLFSDSESYINELGDGELDATYGGSTPIIWSVRASVVLTIAAVTLFTNQGEAN	WP_163927072_2	none
1541	WP_138498533	#2e86c1	Nostoc	none	none	cc1	Nostoc sp. PA-18-2419	840	3	35.72	yes	MANIAISNLRPAGADLFDGSESFMNDLTDSELDMTKGGLTPAFFAGVAVGIAITYALK	WP_138498533_3	none
1550	WP_096688632	#2e86c1	Calothrix	none	none	cc1	Calothrix sp. NIES-4071	2680	5	22.3	yes	MATINISDLRPAGSDLFSNSESYMNELGDSELDIINGGFGLLPLLFSAMVIFAPPAY	WP_096688632_5	none
1552	WP_106371152	#2e86c1	Chlorogloea	BlpC_Streptocco: quorum-sensing system pheromone BlpC	NF033215.1	cc1	Chlorogloea sp. CCALA 695	1814	5	25.2	yes	MATIAIYNLRAPGAELFMDSESYLQELTDTEIDTTKGGLFWVGVAVGILISARYC	WP_106371152_5	4.70E-07
1554	WP_138499827	#2e86c1	Nostoc	none	none	cc1	Nostoc sp. PA-18-2419	3259	3	22.94	yes	MATIKISDLHPAGSELFVDSESYLNNLTDEELNRTQGGSSFGCIWISVQVSIVTYKAYQGYQAGRRAR	WP_138499827_3	none
1558	WP_019496925	#2e86c1	Calothrix	ATP1G1/PLM/MAT8 family	PF02038.16	cc1	Calothrix sp. PCC 7103	1410	1	28.52	yes	MATISISNLRNSGAELFTDSESYLNELTDVELNETKGGSIIAGAAFIAGVIIGAAIAGRIAKEVC	WP_019496925_1	4.90E-05
1561	WP_124970176	#2e86c1	Aphanothece	none	none	cc1	Aphanothece sacrum FPU1	99	9	25.34	yes	MPNITISDLTPAGSDLFSDSESYLHELKDVEINATRGGITPWLLVVAFTLIAFDAK	WP_124970176_9	none
1576	WP_106289349	#2e86c1	Merismopedia	Peptide-N-glycosidase F, C terminal	PF09113.10	cc1	Merismopedia glauca CCAP 1448/3	1731	3	19.86	yes	MATILINDLNPAGYSLFTDDESYLRDLSSDDELSISGGATTSVTWTIASSGWCVATIVTISLVDITRRLL	WP_106289349_3	3.90E-06
1580	WP_035150190	#2e86c1	Calothrix	none	none	cc1	Calothrix sp. 336/3	2846	3	33.62	yes	MSTIKISELYPVGSELFQDSESYLNELNDQEMLVMGGKKNKYKFVITSVIEVISQASVSNGFSLNTFSFVTGG	WP_035150190_3	none
1586	WP_087592205	#2e86c1	Cyanobacteria	plantaricin: plantaricin C family lantibiotic	NF000539.0	cc1	Cyanobacteria unicellular cyanobacterium SU3	792	11	17.8	yes	MADIKISNLNPVGSDLFNDSESFMTELTDEQIKTTHGGSTTPCYAIILLLL	WP_087592205_11	3.80E-06
1588	WP_138499827	#2e86c1	Nostoc	none	none	cc1	Nostoc sp. PA-18-2419	3540	2	29.54	yes	MATIKIFDLHPAGSELFLDSESYLNDLTDDELNSTQGGLSPLTISSWWCAGAIAYSVTYAWGRWGPK	WP_138499827_2	none
1591	WP_066371470	#FF0000	Herbidospora	none	none	cc1	Herbidospora mongoliensis	207	4	40.3	yes	MSTELLMNGADAYTSLAEVATAEPETLDALPTPTVSISISLTYLLEC	WP_066371470_4	none
1594	WP_062339008	#FF0000	Herbidospora	none	none	cc1	Herbidospora sakaeratensis	807	1	47.87	yes	MSAELLMEGADAYTSLAEVAASGEFDSPEMLPTITVTTITTISVASFTYALDC	WP_062339008_1	none
1596	WP_062339008	#FF0000	Herbidospora	none	none	cc1	Herbidospora sakaeratensis	232	3	38.57	yes	MSAELLMEGAGAYTSLAEVATATESDSPEATPVVSFLTGVSYGVSVMGTYYWSC	WP_062339008_3	none
1599	WP_066371470	#FF0000	Herbidospora	none	none	cc1	Herbidospora mongoliensis	423	3	41.09	yes	MSAELLMNGADTYTTLAEVAADQETPDAASVVTVTITIYTISIAYTLGSEC	WP_066371470_3	none
1606	WP_155349848	#FF0000	Acrocarpospora	none	none	cc1	Acrocarpospora pleiomorpha	414	1	34.37	yes	MSVEHLMEGADAYTSLAEVATANEIESPEATPLTTVTTISFISFTVVLGC	WP_155349848_1	none
1610	WP_066371470	#FF0000	Herbidospora	none	none	cc1	Herbidospora mongoliensis	44	5	32.42	yes	MPADHLMDGAAAYVSLAELAAESGPEAAPILTTSLPHTLTVYLQC	WP_066371470_5	none
1612	WP_062346719	#FF0000	Herbidospora	none	none	cc1	Herbidospora yilanensis	384	2	35.31	yes	MSAESLMDGAAAYTSLAEVATADQIDVPEITPTAGYLTVSMITVATLFAEC	WP_062346719_2	none
1620	WP_068385845	#2e86c1	Leptolyngbya	none	none	cc1	Leptolyngbya sp. NIES-3755	1790	6	16.27	yes	MSQIKISALSPAGSELFQDAESFLQDLAPSDLQDVAGGLADVVGLSIVVHPVLSLQYYSGVVQTNVTVSVAIGFQTASILSIAH	WP_068385845_6	none
1627	WP_073591536	#2e86c1	Phormidium	none	none	cc1	Phormidium ambiguum IAM M-71	3216	4	27.01	no	MAILYVDDLKPTGLDLMSGEESFLSDLSDEQTNLTYGGATATPYFIVFIGAAALSYQVGRNHRE	WP_073591536_4	none
1638	WP_017581465	#FF0000	Nocardiopsis	none	none	cc1	Nocardiopsis valliformis DSM 45023	496	1	48.64	yes	MGTESLMNGADNYTDPAEITEDQDVEEPGVVVTTVVPGPITLLPVSVTTTVRIGC	WP_017581465_1	none
1642	WP_062346719	#FF0000	Herbidospora	none	none	cc1	Herbidospora yilanensis	33	3	30.88	yes	MNFLLIDHLMNGAAAYTSLSEIAVEDGPEAAPILTTSVPHTLTVYLEC	WP_062346719_3	none
1678	WP_015078657	#2e86c1	Anabaena	none	none	cc1	Anabaena sp. 90	1640	2	38.76	yes	MATITLSQLNTTGSELFADSESYLNELNDAASVSINGGGSDFSGFSAYGDFGVKYLEFLVDGYAIASIKHIAKSFSNDSHYGH	WP_015078657_2	none
1682	WP_012409362	#2e86c1	Nostoc	none	none	cc1	Nostoc punctiforme PCC 73102	3107	4	41.46	yes	MASIALSQLNTTGSELFQDSESFLSDLNNVDTITIYGGGDEGDVSNVSEGIEPLLAYGIKGQEFALLGFGASLTAHIVKSFSDTDTNL	WP_012409362_4	none
1693	WP_026100063	#2e86c1	Fortiea	none	none	cc1	Fortiea contorta PCC 7126	3513	4	45.32	yes	MAFIAVNELRATGAELFQDSESYLTELNNLDAVHGGIDAGATATILGLVTKGYEFGVYTVGIEGISKLVKSFSNGGGYSGAV	WP_026100063_4	none
1736	WP_015127932	#2e86c1	Calothrix	none	none	cc1	Calothrix sp. PCC 7507	2703	1	44.01	yes	MATIALSELHTTGSELFQDSESFLNDLNNMDSISVYGGGSGGDVSDTADGVTPILEYGIKGQEFGLLAFGANLTAHIVKSFSEGGSFY	WP_015127932_1	none
1750	WP_012409362	#2e86c1	Nostoc	none	none	cc1	Nostoc punctiforme PCC 73102	2727	2	42.86	yes	MASIALSQLNTTGSELFQDSESFLSDLNNVDTITIYGGGDEGEVSNVSEGIEPLLAYGIKGQEFALLGFGASLVAHIVKSFSDTDTHY	WP_012409362_2	none
1753	WP_114082527	#2e86c1	Nostoc	none	none	cc1	Nostoc sp. ATCC 53789	1983	2	45.38	yes	MASIALSQLNTTGSELFQDSESFLNDLNNVDSITIYGGSNGGDVSSVGEGIDPLLAYGAKGQEFALLAFGASLTAHIVKSFSDVDTHF	WP_114082527_2	none
1756	WP_011321056	#2e86c1	Trichormus	none	none	cc1	Trichormus variabilis 0441	2344	2	44.31	yes	MAFIAVKELQVTGAELFQDSESFLNELNNLDNSVHGGGDYSNTTNGVLDLAVKGFEFGVITYGIDAIGHLARSFSSAA	WP_011321056_2	none
1762	WP_015127932	#2e86c1	Calothrix	none	none	cc1	Calothrix sp. PCC 7507	3086	2	42.73	yes	MATIALSELYTTGSELFQDSESFLNDLNNMDSISVYGGGSGGDVSSAAEGVEPLLEYGIKGQEFGLLAFGANLTAHIVKSFSENGTFY	WP_015127932_2	none
1767	WP_012409362	#2e86c1	Nostoc	none	none	cc1	Nostoc punctiforme PCC 73102	2353	7	36.55	yes	MASIALSQLNTTGSELFQDSESFLSDLNNVDSITVYGGGYEISSVAHGIEPLLAYGIKGQEFALLGFGASLTAHIVKSFSDTDTHY	WP_012409362_7	none
1791	WP_096681247	#2e86c1	Nostoc	none	none	cc1	Nostoc sp. NIES-2111	1807	6	47.28	yes	MAFIAVKELQNTGAELFQDSESFLSELNNVDTTAVHGGGDGYSSATNGVLDFGLKGFEFGAITFGVDAIGHLVKSFSSNGTYR	WP_096681247_6	none
1800	WP_114082527	#2e86c1	Nostoc	none	none	cc1	Nostoc sp. ATCC 53789	2757	5	41.71	yes	MASIALSQLNTTGSELFQDSESFLNDLNNVDSITVYGGGNDVSSVAEGIDPLLAYGIKGQEFALLAFGASLTAHIVKSFSDSDTHF	WP_114082527_5	none
1812	WP_015127932	#2e86c1	Calothrix	none	none	cc1	Calothrix sp. PCC 7507	1428	7	20.01	yes	MENITISDLQTADSKDFLLDLNNLDSMFVYGGENYGFMPILNYGLKSLEFGLIAYAIYSITLLVSSFNNQQYISGQSNSLYQTFTFY	WP_015127932_7	none
1815	TAE59458	#2e86c1	Nostocales	none	none	cc1	Nostocales cyanobacterium	1260	6	30.79	yes	MVKIQITDLDHLAKQPFIIDINELENMHILGGANQNFSALFNFAIKSMEFVLIAYAIDAISRLVTSFSERY	TAE59458_6	none
1820	WP_051840194	#FF0000	Streptomyces	none	none	cc1	Streptomyces lavendulae subsp. lavendulae	2826	2	61.06	yes	MQNVTEKDLFDGYTAYTSAEELGLHDGATAGPAFSPTVPWAIQATVISARSSQACAAALGSLAAKTVEKKC	WP_051840194_2	none
1821	WP_018960901	#FF0000	Streptomyces	none	none	cc1	Streptomyces sp. CNB091	3179	1	52.71	yes	MQNVTEQDLFDGYTAYTSAEELGLHDGKDAAPAFSPTIPWAIRATIISARSSQQCAAALGSLAAKTVENKC	WP_018960901_1	none
1824	WP_009079852	#FF0000	Amycolatopsis	none	none	cc1	Amycolatopsis sp. AA4	2791	1	43.07	yes	MHTMTETDLLSGYTAYTTAEELDQFDGKAAPAATTPVLAPILIRASIIAARSSQQCAAGIAAAGGGIWRTIRKVC	WP_009079852_1	none
1826	WP_141310912	#FF0000	Streptomyces	none	none	cc1	Streptomyces spinoverrucosus	3059	1	65.59	yes	MQSTQNEKDLFEGYTAYTSAEELGLYDGKDAAPAFSPTIPWAIRATIITARSSQQCAAALGSLTAKTIEKKC	WP_141310912_1	none
1828	WP_058047489	#FF0000	Streptomyces	Two-component Enterococcus faecalis cytolysin (EFC)	PF16934.5	cc1	Streptomyces sp. MBT76	3009	1	60.19	yes	MQNVNEKDLFDGYTAYTSAEELGLYDGKDAAPAFSPTIPWAIRAGLITARSSQQCAAAIGSFTARTIESKC	WP_058047489_1	1.50E-06
1831	WP_051418997	#FF0000	Salinispora	none	none	cc1	Salinispora tropica CNH898	3147	1	41.26	no	MNAVLTGDDLLGGYTAYTSAVELDVTDGGAQAPAFSPAASPLVPILLRATLITARSSQNCAIAIARTTGGIARTIEIVC	WP_051418997_1	none
1833	WP_097866484	#FF0000	Streptomyces	none	none	cc1	Streptomyces sp. rh34	3041	1	54.95	yes	MTGRQFPFMERKLMQNVTEQDLFDGYTAYTSAEELGLHDGKDAAPAFSPTIPWAIRATIISARSSQQCAAALGSLAAKTVENKC	WP_097866484_1	none
1835	WP_093908736	#FF0000	Streptomyces	Two-component Enterococcus faecalis cytolysin (EFC)	PF16934.5	cc1	Streptomyces sp. cf386	2855	1	63.83	yes	MQSTQNEKDLFEGYTAYTSAEELGLYDGKDAAPAFSPTIPWAIRATIITARSSQQCAAAIGSLTAKTIENKC	WP_093908736_1	3.80E-06
1837	WP_159770677	#FF0000	Streptomyces	none	none	cc1	Streptomyces sp. HM190	3317	1	65.39	yes	MQSTQNEKDLFEGYTAYTSAEELGLYDGKDAAPAFSPTIPWAIRATIITARSSQQCAAALGSLTARTIEKKC	WP_159770677_1	none
1839	WP_126393842	#FF0000	Streptomyces	Two-component Enterococcus faecalis cytolysin (EFC)	PF16934.5	cc1	Streptomyces sp. MK-45	2920	1	63.39	yes	MQSTQNEKDLFEGYTAYTSAEELGLYDGKDAAPAFSPTIPWAIRATIITARSSQQCAAAIGSLTAKTIENKC	WP_126393842_1	3.80E-06
1841	WP_120754718	#FF0000	Streptomyces	Two-component Enterococcus faecalis cytolysin (EFC)	PF16934.5	cc1	Streptomyces klenkii	2933	1	65.7	yes	MQNVTEKDLFDGYTAYTSAEELGLYDGKDAAPAFSPTIPWAIRATLITARSSQQCAAAIGSFTARTIESKC	WP_120754718_1	3.00E-06
1843	WP_051840194	#FF0000	Streptomyces	none	none	cc1	Streptomyces lavendulae subsp. lavendulae	3137	1	67.06	yes	MQNVTEKDLFDGYTAYTSAEELGLHDGATAGPAFSPTVPWAIQATVISARSSQACAAALGSLAAKTVEKKC	WP_051840194_1	none
1845	WP_106331017	#FF0000	Actinoplanes	none	none	cc1	Actinoplanes italicus	2817	2	48.48	no	MEKLNTENLVDGYTEYTSAEELELMDAGANAPAFSPAVSPLVPILIRASIIAASSSTRCAESIARATGGVSKTIKEVC	WP_106331017_2	none
1847	WP_143043955	#FF0000	Nonomuraea	none	none	cc1	Nonomuraea jiangxiensis	678	1	38.24	yes	MAEKDLVDGYEAYTDAEELAFDEAGDEESPSTPWCIASIVITASAGC	WP_143043955_1	none
1849	WP_062295185	#2e86c1	Nostoc	none	none	cc1	Nostoc piscinale CENA21	2944	3	34.56	yes	MANITLSELNAAGSQLFQDSESFLNELSEVDAIATHGADSNSNSYISDFYGFNKLIEGFVDVYAIQHVYGIAKSFSHGGYSNSAY	WP_062295185_3	none
1850	WP_127086205	#2e86c1	Calothrix	none	none	cc1	Calothrix desertica PCC 7102	2097	5	15.9	yes	MANISISNLHATGADLFADSESYLNELTEAELSSTKGGFSPSPITIPIILASPELIKQLKKLL	WP_127086205_5	none
1951	RCJ40334	#2e86c1	Nostoc	plantaricin: plantaricin C family lantibiotic	NF000539.0	cc1	Nostoc punctiforme NIES-2108	754	3	28.41	yes	MATIKIDNLSVTGNEFFSDSESYLDQLTELSESDALSIQGGITPVIIITLTPFLLG	RCJ40334_3	1.20E-05
1953	WP_167721203	#2e86c1	Tolypothrix	none	none	cc1	Tolypothrix sp. PCC 7910	3330	8	26.33	yes	MATIRIEQLSAGFELIADEETFLDELSNSDLDLNKGGITPVITSLIVFSAGYGVGRAITAIFK	WP_167721203_8	none
1963	WP_162398402	#2e86c1	Nostoc	plantaricin: plantaricin C family lantibiotic	NF000539.0	cc1	Nostoc sp. B(2019)	1587	1	28.85	yes	MATIKIDNLSISGTELFSDSESYFDQLSELSESDALGIKGGTWTITITTVLLLRGDTRQE	WP_162398402_1	4.30E-06
1967	WP_155746097	#2e86c1	Scytonema	none	none	cc1	Scytonema sp. UIC 10036	1398	1	41.14	yes	MASIEISNLHPVGSNLFNDSESYLNELSDREMLGLEGGILGALGGTLAGLIPAEGLLGYGSLNVTGPDSVQNVTGLDFLAGLLGGGSKGT	WP_155746097_1	none
1971	WP_012409787	#2e86c1	Nostoc	Special lobe-specific silk protein SSP160	PF06933.11	cc1	Nostoc punctiforme PCC 73102	3458	4	32.89	yes	MSTIKIDNLSVTGSELFDDSESYLDQLSESDALSIQGGLNSTIITVTTVTATTTTAIPTTETTAILTIKTITLATLGLD	WP_012409787_4	1.70E-05
1988	WP_017198207	#FF0000	Arthrobacter	none	none	cc1	Arthrobacter sp. M2012083	293	5	8.2	yes	METKELMSLVSGYSTYAAADEISFTAEGDTPASSPLCGFLASFAFSYFTSTGGPPKR	WP_017198207_5	none
1998	WP_159425899	#FF0000	Streptomyces	GAGA factor	PF09237.11	cc1	Streptomyces noursei ATCC 11455	342	3	14.09	yes	MELDEMISGYDTYVDVAELDVSAQSEAPATSPTCFIASVGLSYQITKDL	WP_159425899_3	7.50E-07
2011	WP_019499235	#2e86c1	Pseudanabaena	none	none	cc1	Pseudanabaena sp. PCC 6802	2229	2	33.03	yes	MANIDINELNAIGSDLFDDAETYLQDLSEGELRIQGGLDADCWPTKPTTVTSITQSTAIICSIGFPTTKPYSPLCAVTMG	WP_019499235_2	none
2015	WP_019501955	#2e86c1	Pseudanabaena	none	none	cc1	Pseudanabaena sp. PCC 6802	4420	6	24.42	yes	MSNIVVANLNHAGSDLFSDPENYMADVTDSELGHVSGGLWTPFMVISSFSTVTIGLLPL	WP_019501955_6	none
2034	WP_015207767	#2e86c1	Cylindrospermum	Type-A lantibiotic	PF04604.13	cc1	Cylindrospermum stagnale PCC 7417	4059	5	18.04	no	MGVTEMAKLKINELKAAGTELFEDSETFLDELSNDELENAIGGRRIYPTGGRPTIVGTPGKITPGCPFTRRTFGGLTTRYSPVVL	WP_015207767_5	1.90E-06
2036	WP_096579222	#2e86c1	Anabaenopsis	none	none	cc1	Anabaenopsis circularis NIES-21	226	1	58.07	yes	MNYQDSALNSVGSELFIDSENFLQDLADTDAMNLQGGYGPGIEKLLEFGINVYALNNIVSIAKTFSGAAGGVLGNGGAGGAGGAGAGGAGAGGD	WP_096579222_1	none
2044	WP_015113151	#2e86c1	Nostoc	none	none	cc1	Nostoc sp. PCC 7107	2353	3	32.34	yes	MANITLSALNAAGSQLFQDSESFLNDLSDVDAIATHGAENNSNSYVSDFYGFNKLIEGYVGVYAIQHIYGIAKSFSQGGYGVSGY	WP_015113151_3	none
2084	WP_019501955	#2e86c1	Pseudanabaena	none	none	cc1	Pseudanabaena sp. PCC 6802	5350	4	28.56	yes	MANIAISDLKLAGFDLFSDSESYMRDLSDTELNAQGGITPVLAASSEPCGMAVAFGAAALYDWLFG	WP_019501955_4	none
2096	WP_015216084	#2e86c1	Anabaena	plantaricin: plantaricin C family lantibiotic	NF000539.0	cc1	Anabaena cylindrica PCC 7122	1990	8	29.56	yes	MAVIAINDLRPTGAELFFGSESFMTDLNDNELGNVNGGITPSWYFAAVGVTALVGYLANRK	WP_015216084_8	2.40E-06
2099	WP_138498533	#2e86c1	Nostoc	none	none	cc1	Nostoc sp. PA-18-2419	1622	6	32.08	yes	MANIAISNLRPAGADLFDGSESFMNDLTDSELDITKGGFTPAFVLGFAAGVAAGVAISYLLK	WP_138498533_6	none
2104	AVH79628	#2e86c1	Nostoc	Microcin V bacteriocin	PF17508.2	cc1	Nostoc sp. PCC 9201	607	2	39.65	no	MASIAILDIRPVGHDLFFDGESYMADLSDNELERVVGGTEPISAAVAVSIGVAAGAAFLGGLWAALK	AVH79628_2	1.70E-05
2129	WP_163699711	#2e86c1	Leptolyngbyaceae	none	none	cc1	Leptolyngbyaceae cyanobacterium CCMR0081	3884	3	19.03	yes	MSSIKVDSLSPAGLEMMQSSESFLTELGDADDKIYGGKIYSDSRTTISVISTPPCIAGFIASNIVTNL	WP_163699711_3	none
2134	WP_066383651	#2e86c1	Anabaena	Sec34-like family	PF04136.15	cc1	Anabaena sp. 4-3	3572	1	57.17	yes	MAFIAVNELRATGSELFQDSESFLNELNNLDDSVHGGYXXXXLFQDAESFLNELNNLDDSVHGGGYGYSGATNGVLDLAEKGFEFGVITYGIDAIGHMAKSFSDASTGGW	WP_066383651_1	0.00011
2140	WP_011321056	#2e86c1	Trichormus	none	none	cc1	Trichormus variabilis 0441	1706	8	17.25	yes	MARITVSELHLYGSENFLTELNHEESRLIHGGNKYSYDQISVLAEKIFQFITISFAIAAILKIVDSYIGNRYK	WP_011321056_8	none
2155	WP_026100063	#2e86c1	Fortiea	none	none	cc1	Fortiea contorta PCC 7126	1427	7	43.12	yes	MASIAVHELHTTGIELFKNSESYLTELNHLDEVYGGQYVDISYTTSYGYSQGITAIFLPVVKGYEFAIYAFALEAIVEIVKLYSISNTLYKLTSNSWMNLGITQ	WP_026100063_7	none
2178	WP_096576757	#2e86c1	Aulosira	CfrBI restriction endonuclease	PF09516.10	cc1	Aulosira laxa NIES-50	1389	1	31.86	yes	MADIKIHDIVITGAELFLDSESFMNDLGDDEMNIRGGDWSTLSKACATVGKDEWSTFSGGCRNDDVPEFLQ	WP_096576757_1	4.60E-06
2182	WP_096576751	#2e86c1	Aulosira	CfrBI restriction endonuclease	PF09516.10	cc1	Aulosira laxa NIES-50	388	1	31.86	yes	MADIKIHDIVITGAELFLDSESFMNDLGDDEMNIRGGDWSTLSKACATVGKDEWSTFSGGCRNDDVPEFLQ	WP_096576751_1	4.60E-06
2186	WP_015193424	#2e86c1	Stanieria	plantaricin: plantaricin C family lantibiotic	NF000539.0	cc1	Stanieria cyanosphaera PCC 7437	1586	5	37.6	yes	MTNIRLSELHPVGSELFQDSESFLNELNTEELGEILGGGSIVTHVTQFSVSKGHITKSVGVSGVYKLTSKASISGANISYGNNISVIKTLLS	WP_015193424_5	3.20E-05
2188	WP_105222244	#2e86c1	Gloeocapsopsis	plantaricin: plantaricin C family lantibiotic	NF000539.0	cc1	Gloeocapsopsis sp. AAB1 = 1H9	1943	2	32.1	yes	MASIKIFELTPAGAELFQDTESFLNELNDQESLMISGGGGSDLNISNISQVTVSIGISLKSVSVVSQVKSNFYFGKREQKK	WP_105222244_2	2.50E-06
2191	WP_015193424	#2e86c1	Stanieria	Type-A lantibiotic	PF04604.13	cc1	Stanieria cyanosphaera PCC 7437	2710	3	43.78	yes	MANIKLSELNPVGSELFQDSENFLNELNDQEMDAVMGAATVNTVASQSIGTQASQATVSGGNISVSNGVSVVATLTIG	WP_015193424_3	2.70E-07
2205	WP_087542717	#2e86c1	Nostocales	plantaricin: plantaricin C family lantibiotic	NF000539.0	cc1	Nostocales cyanobacterium HT-58-2	2798	4	35.97	yes	MAIIKISELRPAGSELFQDSESFLNELTEQETVGLEGGFAFNGTLGVSISAQTVNGNTVNANTFGNINTAVIA	WP_087542717_4	7.90E-06
2207	WP_068385845	#2e86c1	Leptolyngbya	none	none	cc1	Leptolyngbya sp. NIES-3755	2134	5	27.62	yes	MPTIKIDHLQPAGAELFQDSESYLNELSSEDTRVVGGDAQVVFISVVTQTIGVNSQVTVSMGISLQSLSVVSVVRSLPRF	WP_068385845_5	none
2210	WP_015193424	#2e86c1	Stanieria	none	none	cc1	Stanieria cyanosphaera PCC 7437	1993	4	42.12	yes	MGNIKLSELCPAGSEFFQDSESFLKDLNEQEVSVIVGGEGLVTGIVTQIISQANGSIASQASISGGQITVSVGATVVGYF	WP_015193424_4	none
2213	WP_015189896	#2e86c1	Gloeocapsa	none	none	cc1	Gloeocapsa sp. PCC 7428	1246	1	38.12	yes	MASIKISELKPLGNELFQDEESFLDELNERETLFITGGKKNEANLDISVLTVLTESIGISLQTVSIVTQIKKIKIKIKQ	WP_015189896_1	none
2223	WP_015189896	#2e86c1	Gloeocapsa	plantaricin: plantaricin C family lantibiotic	NF000539.0	cc1	Gloeocapsa sp. PCC 7428	1858	2	36.0	yes	MSCLKISDLSPTGLELFQDAENFLNELSDREIENITGGFFSFFTDEFLPIPSDLVLKTVVKTRVVSVVTKSVQVKTKGIKTFGVSHTHKTIVTIKR	WP_015189896_2	1.60E-05
2227	BAZ33272	#2e86c1	Cylindrospermum	none	none	cc1	Cylindrospermum sp. NIES-4074	396	4	16.78	yes	MANIKVNDIQPAGLELFADAENFMHQLTDDEITGIVGGLPKDVYPLYDKNTVIISYIYVPK	BAZ33272_4	none
2237	WP_035150190	#2e86c1	Calothrix	Leucine-rich repeat family 19 TM domain	PF15176.6	cc1	Calothrix sp. 336/3	1607	1	38.59	yes	MSIIRIVQLRPPGADLFDDNESFISELSEAESGDFLGGLIISQVTVSAGIVLTTKRVVWSKNYFRYTLRSGIKKSQFTITIKTQVI	WP_035150190_1	9.10E-06
2239	WP_096689510	#2e86c1	Calothrix	none	none	cc1	Calothrix sp. NIES-4071	1484	4	18.42	yes	MSSIKISNLGLVGSDLLVDSESYLEELNDAEIKYTLGGVVVSQATVTAGFLVVPEYQNERNYQQYWAPAYFNVDSYFHNITYSIKSSIIDIFST	WP_096689510_4	none
2246	WP_167717694	#2e86c1	Tolypothrix	Leucine rich repeat N-terminal domain	PF01462.18	cc1	Tolypothrix sp. PCC 7910	4343	3	23.15	yes	MANIKVNDLLNLNLAGTELFNDLESFLKEFSEDDNQIFGGGINLTFPTPSCNCANTSVWCKGESMIMA	WP_167717694_3	1.00E-06
2269	WP_155746097	#2e86c1	Scytonema	Bacteriocin class II with double-glycine leader peptide	PF10439.9	cc1	Scytonema sp. UIC 10036	1961	2	28.31	yes	MSNIKIENIQPAGSQLFQDPESFLNEMSDREMWSVQGGLTLDTLVITFPATISDPLSSATAGTLSEVSSGVTSGTVGGLSLTGAV	WP_155746097_2	7.20E-07
2275	WP_008178764	#2e86c1	Moorea	none	none	cc1	Moorea producens 3L	1231	1	20.32	yes	MANIKVNNIKPAGAELFGDSESFIKDLQDNELELAGGSECPSPFPTSHPGNCPTGTEVF	WP_008178764_1	none
2322	WP_152591271	#2e86c1	Nostoc	none	none	cc1	Nostoc sphaeroides CCNUC1	1659	1	33.44	yes	MASIRISELRPAGSELFQDSESFLTDLGAQEMGITGGASVVGGISVTVTQTVTQTATQTQTQTATQTFTQTVSLNVP	WP_152591271_1	none
2405	WP_015216084	#2e86c1	Anabaena	none	none	cc1	Anabaena cylindrica PCC 7122	2836	12	12.29	no	MSKLKVSDLNPPGFQLFQDSETFLIDLNDDDLYIAGGGISITTRISVIQIPASEDIYQPSISFIW	WP_015216084_12	none
2410	AVH79456	#2e86c1	Roholtiella	none	none	cc1	Roholtiella [Tolypothrix] sp. PCC 7415	2243	7	8.49	no	MSRLNVSDLNPAGYEFFQDSESFLIDLQEDELYIHRGGIFITTNISVINVPISEDIFAPSISFIR	AVH79456_7	none
2415	WP_131089594	#FF0000	Arthrobacter	none	none	cc1	Arthrobacter sp. S41	292	1	28.6	yes	MSNTNIVENNSALTDLAQAHTAYAAPSELGADAAAEAPATTPFCAGVLIGATLTVGC	WP_131089594_1	none
2416	WP_096285992	#FF0000	Arthrobacter	none	none	cc1	Arthrobacter sp. MYb216	388	1	32.52	yes	MDNNALAPQANLTDLAQAHNTFTTAGELGADAATEAPATSPLCVGIIIGATLGAGC	WP_096285992_1	none
2418	WP_166841243	#FF0000	Paenarthrobacter	none	none	cc1	Paenarthrobacter sp. MSM-2-10-13	113	2	28.74	yes	MSNAVVNFHQANLTDLARAHSTFAAADELGGDAATEAPATSPLCIGIIVGATLGAGC	WP_166841243_2	none
2425	WP_061955677	#FF0000	Arthrobacter	none	none	cc1	Arthrobacter sp. EpRS66	494	1	26.22	yes	MSNTTIVENNSALTDLAQAHTAYAAPSELGADAAAEAPATSPFCAGVLIGATLTVGC	WP_061955677_1	none
2428	WP_061955677	#FF0000	Arthrobacter	none	none	cc1	Arthrobacter sp. EpRS66	273	2	22.83	yes	MSNTTALTDLAQAHTIYAAPDELGADAAAEAPATSPLCVGIIVGATLGTGC	WP_061955677_2	none
2430	WP_131089594	#FF0000	Arthrobacter	none	none	cc1	Arthrobacter sp. S41	71	2	23.44	yes	MSNTNALTDLAQAHTAYAAPSELGADAAAEAPATSPLCIGIIVGATLGAGC	WP_131089594_2	none
2433	WP_104291723	#FF0000	Rathayibacter	GAGA factor	PF09237.11	cc1	Rathayibacter sp. AY1A2	373	2	50.85	yes	MSTITGQTVQSADLAELATAHDTFTAADEIGTDAASEAPATTPFCAGVIIGVTLTAGC	WP_104291723_2	6.90E-07
2435	WP_091465037	#FF0000	Paenarthrobacter	none	none	cc1	Paenarthrobacter nitroguajacolicus	113	1	30.6	yes	MSNAIVNFHQADLTDLARAHSTFAAADELGGDAATEAPATSPLCIGIIVGATLGAGC	WP_091465037_1	none
2437	WP_103138325	#2e86c1	Nostoc	plantaricin: plantaricin C family lantibiotic	NF000539.0	cc1	Nostoc sp. CENA543	1593	4	38.52	yes	MAIVISDLNSEYNLLFDSESYLNEVTDAELSGAVGGATPATWGAYLLTTLVIGGSGAAFGALVYKLTH	WP_103138325_4	2.70E-06
2448	WP_006195640	#2e86c1	Nodularia	none	none	cc1	Nodularia spumigena UHCC 0039	4312	1	45.77	yes	MANITLSELHAAGSELFQDSESFLNEFSDVDSISGGQIGYGAGIGAQVAVSDPTTLTKLAGAFVTVYAIGHVTVLAKSFSGI	WP_006195640_1	none
2451	RCJ30949	#2e86c1	Nostoc	none	none	cc1	Nostoc minutum NIES-26	4101	1	36.75	yes	MATINLAELYAAGSELFQDTESFLNELSDVDSISGGNYGSNVSDISGLTKLAEAYVLTYGVGHIAVITKSYSHGGYGFGY	RCJ30949_1	none
2480	RCJ30949	#2e86c1	Nostoc	none	none	cc1	Nostoc minutum NIES-26	3695	3	31.29	yes	MANINLSELHAAGSELFQDTESFLNELSDVDSISGGNYGSNVSDISGLTKLAEAYVLTYGVGHIAVITKSYSHSNYGFGY	RCJ30949_3	none
2493	WP_069073064	#2e86c1	Nostoc	none	none	cc1	Nostoc sp. KVJ20	1380	8	15.65	yes	MSNITISELRPADSENYLTDLTNMDSMLVYGGEEDDFTQMLNFGVKSLEFMLLSFAIYNNTLLAKSFNPNGNVT	WP_069073064_8	none
2500	WP_015127932	#2e86c1	Calothrix	none	none	cc1	Calothrix sp. PCC 7507	2326	3	39.07	yes	MATIALSELHTTGSELFQDSESFLNDLNNTDSISVYGGNSDVSDTADGVTPILEYGIKGQEFGLLAFGANLTAHIVKSFSEGGSFY	WP_015127932_3	none
2532	WP_016864763	#2e86c1	Fischerella	none	none	cc1	Fischerella muscicola CCMEE 5323	1322	2	33.91	yes	MSSIAISDLDLTGISLFVDRESYLDEVTSEDFDSIHGGSSPVCAFAAASSAECAAFAIGVVRSAVMVLSAYGAYRAISNASK	WP_016864763_2	none
2536	WP_151696789	#2e86c1	Microcystis	Bacteriocin class II with double-glycine leader peptide	PF10439.9	cc1	Microcystis aeruginosa NIES-4325	619	3	24.86	yes	MQKIRIDNLECPAGYDLFLDSESFLDEVHESEYQRINGGVSPTLASSAWCFAGGVAVGAAISGAIAWGVKKILE	WP_151696789_3	5.30E-08
2538	WP_096679519	#2e86c1	Nostoc	plantaricin: plantaricin C family lantibiotic	NF000539.0	cc1	Nostoc sp. NIES-2111	1061	4	32.08	no	MASIAISDIRPVGHELLFDSESYMTELNSNELDRIVGGTDPISLGVAAFVIVVGAGLTGFAIGSALK	WP_096679519_4	1.80E-05
2540	WP_019505167	#2e86c1	Pleurocapsa	Cysteine-rich acidic integral membrane protein precursor	PF07016.11	cc1	Pleurocapsa sp. PCC 7319	5502	4	24.79	yes	MPNINIDNISDLDLNGNDLFEDSESFITELSDDNEQAIIGGCLFTGGCLFTDGCGLTRIGGCGNTIGQCGNTIVINISI	WP_019505167_4	6.70E-06
2546	WP_138499068	#2e86c1	Nostoc	none	none	cc1	Nostoc sp. PA-18-2419	2800	6	38.13	yes	MASIALSQLNTTGSELFQDSESFLNDLNNVDSITIYGGGSDVSSVADGLGPLLAYGIKGQEFGLLAFGASLTAHIVKSFSXSTNYY	WP_138499068_6	none
2560	WP_096681247	#2e86c1	Nostoc	none	none	cc1	Nostoc sp. NIES-2111	2557	3	50.24	yes	MAFIAVKELQNTGAELFQDSESFLSELNNVDTTAVHGGGDGYSSATNGVLDFGLKGFEFGAITFGVDAIGHLVKSFSDNGGWY	WP_096681247_3	none
2635	BAY08128	#2e86c1	Calothrix	Calcineurin-like phosphoesterase	PF00149.28	cc1	Calothrix sp. NIES-2098	1447	4	22.95	yes	MTRIVISDLHHNSSNLIVNAESFIEDINETESMFIHGGDGYAFREFLNFGVKVLEYALIGFAIFSIVSLVQSFLAPRQNQANLFPSINPPIG	BAY08128_4	6.20E-06
2640	WP_096620064	#2e86c1	Calothrix	none	none	cc1	Calothrix sp. NIES-3974	1673	2	26.12	yes	MARIEVQDLHILRSDAKSFINEISDLDASHIHGGRNRLGRREIFLLNLFSIWMEGFITLAAMDYIFRLASNFSPTNSPRRRFPFP	WP_096620064_2	none
2648	WP_015207763	#2e86c1	Cylindrospermum	Calponin family repeat	PF00402.18	cc1	Cylindrospermum stagnale PCC 7417	4058	6	14.88	no	MGVNQMANLKIDELQSAGTELFEDSESFLNELNSNELANAVGGYGYGRRRHGGYGHGGHRHGGYGYGRRW	WP_015207763_6	0.013
2653	WP_015207767	#2e86c1	Cylindrospermum	none	none	cc1	Cylindrospermum stagnale PCC 7417	7120	3	20.33	no	MAKLRINELKTAGSELFEDSETFLDELNNDELVNALGGFGYFSPNGGFITGRVQIDRRTTRTIIGGDILTTRIPTVRTRTPVTL	WP_015207767_3	none
2656	BAZ29283	#2e86c1	Cylindrospermum	none	none	cc1	Cylindrospermum sp. NIES-4074	3066	2	31.83	yes	MATIKLSELQVAGSELFQDSESFINDLSDATSLSINGGDGNSSSFGDYGDFGVKYLEYLILGYGVNAVKEAVKSFSHAD	BAZ29283_2	none
2662	WP_015207763	#2e86c1	Cylindrospermum	none	none	cc1	Cylindrospermum stagnale PCC 7417	3201	3	20.33	no	MAKLRINELKTAGSELFEDSETFLDELNNDELVNALGGFGYFSPNGGFITGRVQIDRRTTRTIIGGDILTTRIPTVRTRTPVTL	WP_015207763_3	none
2667	WP_096681247	#2e86c1	Nostoc	none	none	cc1	Nostoc sp. NIES-2111	1436	8	40.58	yes	MASINLTELQTTGSELFQDSESFLQELNNMDNSVYGGGDGYSSATNFVLAYGIKGFEFGAITFGIDAIGHLVKSFSSHDGY	WP_096681247_8	none
2670	WP_096681247	#2e86c1	Nostoc	none	none	cc1	Nostoc sp. NIES-2111	2182	4	50.24	yes	MAFIAVKELQNTGAELFQDSESFLSELNNVDTTAVHGGGDGYSSATNGVLDFGLKGFEFGAITFGVDAIGHLVKSFSDNGGWY	WP_096681247_4	none
2676	WP_015207763	#2e86c1	Cylindrospermum	Type-A lantibiotic	PF04604.13	cc1	Cylindrospermum stagnale PCC 7417	140	5	18.04	no	MGVTEMAKLKINELKAAGTELFEDSETFLDELSNDELENAIGGRRIYPTGGRPTIVGTPGKITPGCPFTRRTFGGLTTRYSPVVL	WP_015207763_5	1.90E-06
2684	BAZ29283	#2e86c1	Cylindrospermum	none	none	cc1	Cylindrospermum sp. NIES-4074	2345	5	26.96	yes	MASIKLSELQVAGSELFQDSESFINDLSDATSLSINGGDGSSSFGDYGDFGVKYLEYLVLGYGVDAIKYIVKSFSDVH	BAZ29283_5	none
2714	WP_109595189	#FF0000	Actinoplanes	none	none	cc1	Actinoplanes xinjiangensis	921	4	47.06	yes	MEKSENLSELIEGYLVYSETDELNVAAAAEAPATTAPCAAAATASWMVSQFSGKTIAEGC	WP_109595189_4	none
2719	WP_137451632	#FF0000	Nakamurella	none	none	cc1	Nakamurella flava	613	4	24.83	yes	MNDTERTGKAGDISDLVAGYRVWSDTAALDLDAGSQAPAATTTFCAFTVSYLASRATVQEGC	WP_137451632_4	none
2732	WP_137451632	#FF0000	Nakamurella	none	none	cc1	Nakamurella flava	365	3	39.41	yes	MTVSARPEPTPAGDGDKAGQISDLVAGYRVWSDTAALDLDAGSQAPAATTTFCAFTVSYMFSRATVEDGC	WP_137451632_3	none
2745	WP_137451632	#FF0000	Nakamurella	Two-component Enterococcus faecalis cytolysin (EFC)	PF16934.5	cc1	Nakamurella flava	153	2	49.53	yes	MQHKTDTILDLVEGYSAYTELSELNVDATSPAPAASTSPVCIATAISSWKCAAGSGAGIATITTGC	WP_137451632_2	4.60E-06
2747	WP_149853923	#FF0000	Goodfellowiella	none	none	cc1	Goodfellowiella sp. AN110305	44	1	28.66	yes	MSVMLQDRTADLVAGYENYTTAQELTLAVAEGYEDLVAKSTPITITITTTTLIFSCQHD	WP_149853923_1	none
2748	WP_086820178	#FF0000	Allokutzneria	Protein of unknown function (DUF3005)	PF11448.8	cc1	Allokutzneria sp. NRRL B-24872	4393	1	48.83	yes	MLLQDDRMAAELAAGFDTYTTPAELTMAVGDGYEVVAKSVTTATPAITTTTLIFSCHQGCD	WP_086820178_1	4.10E-06
2750	WP_143043955	#FF0000	Nonomuraea	none	none	cc1	Nonomuraea jiangxiensis	210	3	33.24	no	MAEKDLVDGYEAYTDAEELAFDEAGDEESPSTPWCIASIVITASAGC	WP_143043955_3	none
2753	WP_086820173	#FF0000	Allokutzneria	none	none	cc1	Allokutzneria sp. NRRL B-24872	3201	3	47.22	yes	MLLQDDRMAAELAAGYDTYTTSTELTMAVGDGYEIVAKSTSTATPVITTTTLIFSCGPRC	WP_086820173_3	none
2755	WP_051707308	#FF0000	Streptomyces	none	none	cc1	Streptomyces sp. NRRL F-6676	1711	3	32.52	no	MSTEDLMSGYSAYTTPAAAVEEYDQDRAEASWTLIPLTLVTITIIG	WP_051707308_3	none
2757	WP_109003510	#FF0000	Streptomyces	none	none	cc1	Streptomyces rishiriensis	89	2	54.22	yes	MKIENPAEALVGGYRTYTDGDQVAQVAGAEGPEATASITTATPVITTTTLIFDC	WP_109003510_2	none
2759	WP_069887141	#FF0000	Streptomyces	none	none	cc1	Streptomyces luteocolor	102	1	53.21	yes	MKIENPAESLVSGYRVYTDGDQVAQVAGTEGPETTASITTATPVITTTTLIFDC	WP_069887141_1	none
2777	WP_015155263	#2e86c1	Cyanosarcina	none	none	cc1	Cyanosarcina cf. burmensis CCALA 770	1777	1	34.63	yes	MANITISELRPAGFDLFQDSESFLNDLTDTDSMSVLGGSEKGYNDSQYAYHAIVDIAVIHHLSFIAELVGNLASNVGGGNGGGK	WP_015155263_1	none
2926	WP_104258544	#FF0000	Rathayibacter	none	none	cc1	Rathayibacter tritici	58	1	30.31	yes	MSKNEKIMDLVSGYDTYAASSELGDISAADAPATTWYCVAATVTMLSAATYEATC	WP_104258544_1	none
2929	WP_138666048	#FF0000	Nonomuraea	none	none	cc1	Nonomuraea turkmeniaca	6	1	48.71	yes	MTKSTAIMELVAGYDTYAQPGELQVSAISDAPELWFTIWAISYGVRVSSAKCAIWASAASGAVSGWILNR	WP_138666048_1	none
2931	WP_091097544	#FF0000	Nonomuraea	none	none	cc1	Nonomuraea pusilla	6	1	53.02	yes	MTKSTAIMELVAGYDSYADARELQVSAVSDAPELWFTIWAISYGVRVSSAKCAIWASAASGAVSGWILNR	WP_091097544_1	none
2934	WP_138689268	#FF0000	Nonomuraea	none	none	cc1	Nonomuraea zeae	6	2	39.18	yes	MTKSTAIMELVAGYDSYAQPSELQVSAISDAPELWFTIWAISYGVRVSSGRCAIWASAASGAVSGWILGR	WP_138689268_2	none
2936	WP_153461219	#FF0000	Streptomyces	none	none	cc1	Streptomyces kaniharaensis	3398	2	44.27	no	MNTTDQLIAGYTAYTDAQEVGASASAEAPATTPTIVTASSPECGAFTVSVVSGAVGATANWGC	WP_153461219_2	none
2946	WP_127931424	#FF0000	Nonomuraea	none	none	cc1	Nonomuraea polychroma	6	1	50.81	yes	MTKSTAIMELVAGYDSYAEPGELQVSAISDAPELWFTIWAVSYGVRVSSAKCAIWASAASGAVSGWILNR	WP_127931424_1	none
3006	WP_163699711	#2e86c1	Leptolyngbyaceae	none	none	cc1	Leptolyngbyaceae cyanobacterium CCMR0081	1714	2	19.97	yes	MSTITIKKLNPAGTTFFSETESFLGDLNEATLSNINGGGTLNTGSMYCTTRHCGEDFSIFAPVVVVILTPSDSPIPY	WP_163699711_2	none
3038	WP_096728455	#2e86c1	Nostoc	none	none	cc1	Nostoc carneum NIES-2107	3953	1	22.27	yes	MANINVNDLLHLNLIGSDLLNDSESFLTELSDESEQMGIIGGACKLLSLICCNCTYVTEHVIE	WP_096728455_1	none
3070	WP_096689510	#2e86c1	Calothrix	plantaricin: plantaricin C family lantibiotic	NF000539.0	cc1	Calothrix sp. NIES-4071	2453	1	32.34	yes	MFVKVNQLHPVGSELFNDSESYLNELTENEVREVQGGYKYSAVTSDIYINSQITISQGISLATLSAVSNAPLVVNAFNN	WP_096689510_1	2.60E-06
3094	WP_078760724	#FF0000	Marinactinospora	none	none	cc1	Marinactinospora thermotolerans DSM 45154	357	2	39.44	yes	MEKSNEIMELISGYQTWTDADAMNVSSESEAPAATTTFCAFTVSYAFTRQTVIDGC	WP_078760724_2	none
3100	WP_114082527	#2e86c1	Nostoc	none	none	cc1	Nostoc sp. ATCC 53789	2370	3	43.46	yes	MASIALSQLNTTGSELFQDSESFLNDLNNVDSITIYGGSNGGDVSSVGEGIDPLLAYGIKGQEFALLAFGASLTAHIVKSFSDTDPWI	WP_114082527_3	none
3182	WP_079151368	#FF0000	Streptomyces	none	none	cc1	Streptomyces sparsogenes	1473	1	48.54	no	MSAIDLMGGYAAYTTPDAAVAELATTGNAADQSTITIITTTLSLITTITAGDAPV	WP_079151368_1	none
3183	ANI93503	#FF0000	Dietzia	none	none	cc1	Dietzia timorensis	284	5	24.81	yes	MHNDILDGFNTYATPAELADTNAADTPATTVPCSALASITTAELGC	ANI93503_5	none
3185	WP_051859750	#FF0000	Streptomyces	none	none	cc1	Streptomyces xanthophaeus	42	2	32.49	yes	MDAATELFEGYATYVSADEAADLTIPDHELQVTPTAVITTLSLHC	WP_051859750_2	none
3191	WP_051707308	#FF0000	Streptomyces	none	none	cc1	Streptomyces sp. NRRL F-6676	1479	1	42.0	no	MQSADLMGGYAAYTSPRTAVEELATTRNQHDDAEASPWIVTTISLVVTILLPLTAS	WP_051707308_1	none
3197	WP_052269673	#FF0000	Streptomyces	none	none	cc1	Streptomyces pluripotens	5002	3	41.31	yes	MDVMNVEMRCAQPTGHTVTTKEMHMSAQDLMNGFAAYTDVEELAAQSATAHEEMSSTITISLITGVSISLTAEHTC	WP_052269673_3	none
3199	WP_169242999	#2e86c1	Chroococcidiopsis	Protein of unknown function (DUF1509)	PF07420.11	cc1	Chroococcidiopsis sp. PCC 6712	384	3	32.58	yes	MKDNLINNIAPAGADLFSGFGSFLNDLSEHDEAVIAGGGSNSRSRSGRRRRPRRRPRRRVVRKRGSRT	WP_169242999_3	0.00011
3204	WP_167717694	#2e86c1	Tolypothrix	none	none	cc1	Tolypothrix sp. PCC 7910	4002	2	23.52	yes	MNNIKVNDLLYLNMNGADLFNDSESFLTELSDESEQINRIYGGYCVPTSCQEVTNVCMTMTIYFTQMAVGMQA	WP_167717694_2	none
3290	WP_006195640	#2e86c1	Nodularia	none	none	cc1	Nodularia spumigena UHCC 0039	3891	6	37.47	yes	MANITLSELHAAGSELFHDSESFLNEFSDVDSISGGGAVAATGATYVASNPLTLTKLAEAFVVVYAIEHVTIVAKSFSITGVY	WP_006195640_6	none
3304	WP_087539234	#2e86c1	Nostocales	none	none	cc1	Nostocales cyanobacterium HT-58-2	1902	9	10.93	yes	MDATFVHGGFGHGFEAFATINFKVLEAGVLGLGITNVVSLAKSFSKTDTDIF	WP_087539234_9	none
3322	WP_096575011	#2e86c1	Anabaenopsis	none	none	cc1	Anabaenopsis circularis NIES-21	2427	7	26.14	yes	MANITLSELNAAGSQFFQDSESFLNDLSDVDAIATHGANGNSVSDFYGFNKLIEGFLDVYAIQHIFGIANSFSSKGGYGY	WP_096575011_7	none
3325	BAZ30575	#2e86c1	Cylindrospermum	none	none	cc1	Cylindrospermum sp. NIES-4074	2758	1	50.07	yes	MSNIQLSELNPAGSELFMDSESFLQDLTDTDAMVVQGGQGGDINKLLEFGVGAYAINGVISLAKSFSGAAVPGPRPGPEPEPEPDIDE	BAZ30575_1	none
3334	WP_114082527	#2e86c1	Nostoc	none	none	cc1	Nostoc sp. ATCC 53789	3519	4	42.74	yes	MASIALSQLNTTGSELFQDSESFLNDLNNVDSITVYGGGNDVSSVADGLDPLLAYGIKGQEFALLAFGASLTAHIVKSFSDTDPWI	WP_114082527_4	none
3352	TVP62740	#2e86c1	Nodularia	Domain of unknown function (DUF4407)	PF14362.6	cc1	Nodularia sp. (in: Bacteria)	2151	3	33.02	yes	MATITLSQLYATGSELFNDSESFLNELSDIDSNSQGQYNVVGGIITFTALAGTFVGTYAIGHATYVAKSYSQPHYGYGYGRRF	TVP62740_3	4.90E-06
3368	WP_012409362	#2e86c1	Nostoc	none	none	cc1	Nostoc punctiforme PCC 73102	3487	3	41.9	yes	MASIALSQLNTTGSELFQDSESFLSDLNNVDTITIYGGGDEGEVSNVSEGIEPLLAYGIKGQEFALLGFGASLTAHIVKSFSDTDTHY	WP_012409362_3	none
3378	WP_009343975	#2e86c1	Cylindrospermopsis	none	none	cc1	Cylindrospermopsis raciborskii CENA303	1553	6	11.08	yes	MQANGSELFQDSESFLNEMSDINSISVHGGGYYDFSDMSVFTKLAEAFVNTYGIGNIAYLAKSYSDYNY	WP_009343975_6	none
3391	WP_096536886	#2e86c1	Nostoc	none	none	cc1	Nostoc linckia NIES-25	1708	3	30.32	yes	MANITLSELYVSGSELFEGTESFLNDFSDVDSISGGSEWSGFSDLSTLTKLAEAYVDTYAIGHIAFIAKSYSSSSAV	WP_096536886_3	none
3396	WP_062295185	#2e86c1	Nostoc	none	none	cc1	Nostoc piscinale CENA21	2577	5	32.84	yes	MANITLSELNAAGSQLFQDSESFLNELSEVDAIATHGADSNSNSYVSDFYGFNKLIEGFVGVYAIQHIYGIAKSFSHGGNYISAA	WP_062295185_5	none
3410	WP_073639381	#2e86c1	Nostoc	none	none	cc1	Nostoc calcicola FACHB-389	1533	2	18.99	yes	MNKTSTFEIFHNCEILLQELSDVDSMMINGGKSNTYFHDSNFERKLLEYALVGFAISNIVSLVKLFLDTRQHR	WP_073639381_2	none
3414	WP_104291723	#FF0000	Rathayibacter	GAGA factor	PF09237.11	cc1	Rathayibacter sp. AY1A2	74	4	40.33	yes	MTTISTDAQSADLTALAGAHDTFATVDELGSDAATEAPATTPLCVGIIVGATLGAGC	WP_104291723_4	8.00E-06
3415	AFR27446	#FF0000	Arthrobacter	none	none	cc1	Arthrobacter sp. Rue61a	112	1	29.96	yes	MSNAVVNFRQADLTDLARAHSTFAAADELGGDAATDAPATSPLCIGIIVGATLGAGC	AFR27446_1	none
3422	WP_061955677	#FF0000	Arthrobacter	none	none	cc1	Arthrobacter sp. EpRS66	71	4	20.74	yes	MSNTTALTDLAQAHTIYAAPDELGADAAAEAPATSPLCIGIIVGATLGTGC	WP_061955677_4	none
3426	WP_142936832	#FF0000	Arthrobacter	none	none	cc1	Arthrobacter sp. TS-15	112	2	28.74	yes	MSNAVVNFHQANLTDLARAHSTFAAADELGGDAATEAPATSPLCIGIIVGATLGAGC	WP_142936832_2	none
3430	WP_168688294	#FF0000	Leifsonia	none	none	cc1	Leifsonia sp. PS1209	83	2	15.41	yes	MHTTTAVHADLTDLAAAHNAFATAGELGADAATDAPATTPFCVGIIIGATLTAGC	WP_168688294_2	none
3433	WP_096285992	#FF0000	Arthrobacter	none	none	cc1	Arthrobacter sp. MYb216	173	2	31.3	yes	MDNNALAPQANLTDLAQAHNTFTTAGELGADAATEAPATSPLCVGIIIGATLGAGC	WP_096285992_2	none
3442	WP_017318973	#2e86c1	Mastigocladopsis	Kidney androgen-regulated	PF15222.6	cc1	Mastigocladopsis repens PCC 10914	2409	2	21.41	yes	MTESLLVGGKQMANIKISELRPAGAELFQDSESFLNELTEREMWGVEGGLTLDTLSATLADTVSEPLSGVTGGSLGLSIASL	WP_017318973_2	1.90E-05
3446	WP_019501955	#2e86c1	Pseudanabaena	none	none	cc1	Pseudanabaena sp. PCC 6802	2577	9	22.37	yes	MANISISNLSPAGSDLFLDCESYLTDIADRDLDRVNGGLNTTCATLILTILAFTTIV	WP_019501955_9	none
3449	WP_017749323	#2e86c1	Scytonema	Bacteriocin class II with double-glycine leader peptide	PF10439.9	cc1	Scytonema hofmannii PCC 7110	2162	2	28.83	yes	MANIEIQNLQLAGSELFQDSESFLNEMSDSEIWSVQGGLTLDTLVFSLPDTISDPLAGASVGTASGITSGLTSGTIGGLSLTGPV	WP_017749323_2	3.60E-08
3513	WP_045870710	#2e86c1	Fremyella	none	none	cc1	Fremyella diplosiphon NIES-3275	3686	1	19.59	yes	MANIKVHDLMNLNLTGADLFSDSESFMKELSGEDEQIFGGAIPVICVTGTCRKSTIICPVSDQTIVYAV	WP_045870710_1	none
3520	WP_167717694	#2e86c1	Tolypothrix	none	none	cc1	Tolypothrix sp. PCC 7910	3682	4	22.9	yes	MANIKVHDLLNLNLTGAELFNDSESFLKELSEDENQIFGGTACVPGTCQEVTPLCLRTTQIIVHALV	WP_167717694_4	none
3611	WP_086689015	#2e86c1	Nostoc	none	none	cc1	Nostoc sp. T09	1904	1	46.82	yes	MANIKVSELNLAGAELFQDSESFLNDLTDVDTTAVHGGEGAYFPEFSDLGYKVLEYGLVGFGITNIVSLVKSFSTTGGGNNGGGGTSITL	WP_086689015_1	none
3616	WP_127086205	#2e86c1	Calothrix	none	none	cc1	Calothrix desertica PCC 7102	374	6	13.73	yes	MATISISNLNTSGAELFLDTETYLHELTDSELDMTKGGCICISPIFKPTTILKTTSIVSVLR	WP_127086205_6	none
3634	WP_106240815	#2e86c1	Pleurocapsa	plantaricin: plantaricin C family lantibiotic	NF000539.0	cc1	Pleurocapsa sp. CCALA 161	2028	4	38.8	yes	MAQLKITELNPAGSELFQDSENFLEELSDRELNLMAGGMDINSVVTQNSASVGSIQTATVVGISQTNVSVQISNVNASNVNVNASNVNITAF	WP_106240815_4	1.10E-07
3640	WP_086760950	#2e86c1	Nostoc	none	none	cc1	Nostoc sp. RF31YmG	3302	9	26.84	yes	MATIRIEQLSAGFELIADEETFLDELTDSDLDLNKGGITPVITSLIVFSAGYGVGRAITAIF	WP_086760950_9	none
3648	WP_127086205	#2e86c1	Calothrix	none	none	cc1	Calothrix desertica PCC 7102	669	1	28.74	yes	MAKIYISNLSISGAELFADTETYLYELTETEMDMTKGGYFYITAPTVGPTDIMTPIPKYPTTLFQQFQL	WP_127086205_1	none
3653	WP_104899482	#2e86c1	Nostoc	plantaricin: plantaricin C family lantibiotic	NF000539.0	cc1	Nostoc sp. Peltigera membranacea cyanobiont N6	2037	4	28.51	yes	MATIRIEQLSAGFELIADEETFLDELTDSDLDFTKGGTSPVIVTTLIAFSAGYGVGRAVTELFK	WP_104899482_4	1.30E-05
3655	WP_096589596	#2e86c1	Calothrix	none	none	cc1	Calothrix sp. NIES-2098	2311	8	33.16	yes	MATIRIEQLSAGFELIADEETFLDELTDSDLDLNKGGITPVITSLIVFSAGYSVGRAISEIFK	WP_096589596_8	none
3666	BAZ42602	#2e86c1	Calothrix	none	none	cc1	Calothrix sp. NIES-4101	657	3	22.55	yes	MATISISNLNTSGAELFLDAETYLHELTDSELDMTKGGCFDIPPIFKPTTILKTTSIVGYILG	BAZ42602_3	none
3748	AOX46105	#FF0000	Microbacterium	Multi-glycosylated core protein 24 (MGC-24), sialomucin	PF05283.11	cc1	Microbacterium sp. BH-3-3-3	3951	3	25.2	yes	MNHKIIEGYARYVSADEVMTSTASAPEVSPTPATPISTLSFASFVGGVTTYNFGC	AOX46105_3	7.20E-06
3752	WP_008380405	#FF0000	Gordonia	none	none	cc1	Gordonia malaquae NBRC 108250	3692	4	21.41	yes	MLIMNEKLIAGYQTFVSTDEFAGAAASVDTPAISPTPATPISTLSVASFTSGATTYTIGC	WP_008380405_4	none
3755	WP_122818055	#FF0000	Nocardioides	RiPP_CPAC: RiPP peptide	NF033629.0	cc1	Nocardioides sp. 603	10626	9006	36.5	yes	MTTQDLIAGYASYTDATQLSGSEGDAAGITPTTTTASSTPCAASIGASIYTTVSKGC	WP_122818055_9006	2.30E-05
3759	WP_060892878	#FF0000	Streptomyces	none	none	cc1	Streptomyces europaeiscabiei	624	3	50.2	yes	MNTTEQLIAGYTAYTNAEEFGASAESDAPASITVTTVSSGECVYFSLSAVSGSIATTKAWGC	WP_060892878_3	none
3773	WP_086760950	#2e86c1	Nostoc	Bacteriocin class II with double-glycine leader peptide	PF10439.9	cc1	Nostoc sp. RF31YmG	3057	3	54.44	yes	MAAITVHDLRPAGADLFAGSENFMSDLADSELNTVNGGLTPVVIWGVAIASEYVIGAFAVGVGAGIYTAVKK	WP_086760950_3	4.30E-06
3854	WP_072808981	#FF0000	Rhodococcus	none	none	cc1	Rhodococcus zopfii NBRC 100606 = JCM 9919	2551	1	27.06	yes	MALSDGYRMYTTDDELAAGGASGVGAPATTPVLTPLLLRATLIAQKSSQQCAITLAGGTPNVKNTIQKVC	WP_072808981_1	none
3856	WP_072713661	#FF0000	Rhodococcus	none	none	cc1	Rhodococcus rhodnii NBRC 100604	2546	1	11.85	yes	MALSDGYRMYTTDDELAAGNVSGVAAPATTPVLVPLLLRATLIAQKSSQQCAISLAGGTPNVKKTIQSVC	WP_072713661_1	none
3859	WP_031017311	#FF0000	Streptomyces	none	none	cc1	Streptomyces sp. NRRL WC-3795	2906	2	62.61	yes	MQTTQNEKDLFEGYTAYTSAEELGLYDGKDAAPAFSPTIPWAIRATIITARSSQQCAAALGSLTAKTIEKKC	WP_031017311_2	none
3861	WP_157857956	#FF0000	Streptomyces	none	none	cc1	Streptomyces durhamensis	3319	1	58.88	yes	MQSTQTEKDLFEGYTAYTSAEELGLYDGKDAAPAFSPTIPWAIRATIITARSSQQCAAALGSLTAKTIEKKC	WP_157857956_1	none
3898	WP_167725682	#2e86c1	Tolypothrix	none	none	cc1	Tolypothrix sp. PCC 7910	2328	1	48.51	yes	MANIKVSELSPAGSELFQDSESFLNDLNDMDTTSVHGGEGANYIPYLQFGSKLLEYSVVGLGITTIASLVGTFSSTGTGVGGGGTGGGVGGGTGGSTGGSTGGTITF	WP_167725682_1	none
3914	WP_086769105	#2e86c1	Nostoc	none	none	cc1	Nostoc sp. 106C	1787	1	38.7	yes	MPNIKISELQAVGYELLNDSESFLQELTDHEVVVVGQGVQVQSVAASGVVVNLNFNNVNGNTANANTFGNVNTVAYFRR	WP_086769105_1	none
3942	WP_016864763	#2e86c1	Fischerella	Mitochondrial import protein Pam17	PF08566.10	cc1	Fischerella muscicola CCMEE 5323	1620	1	37.65	yes	MSTIQVTDLKPAGFGLFSDSESFLTELSGEEIGSISGGATPYVIIGFIARSSGACGELIGAAIGAAYTYYLSQRSN	WP_016864763_1	1.20E-05
4094	WP_019499235	#2e86c1	Pseudanabaena	none	none	cc1	Pseudanabaena sp. PCC 6802	1335	3	30.51	yes	MATIAISDLSTSGYTLFSDSESYMNDLSEPEIDIRGGELSPLIINAFSPLYLPRGEDLPPLLRSPINIA	WP_019499235_3	none
4097	WP_102939117	#2e86c1	Cylindrospermopsis	none	none	cc1	Cylindrospermopsis raciborskii C04	7161	1	3.06	no	MANITISDLRTTDLRLSDSENYLNDLTDDELKTYGGSKNLSSSYICRHYGSKSCAWAKAKEKGLW	WP_102939117_1	none
4109	AVH79535	#2e86c1	Synechocystis	RPEL repeat	PF02755.15	cc1	Synechocystis sp. PCC 9413	2012	4	26.43	yes	MSAIAIEDLNYLDIFLDGESYLGDLTETELNLRGGLVYSPYLEQQLSLRPTALTLCI	AVH79535_4	1.20E-05
4121	WP_096580419	#2e86c1	Aulosira	Bacteriocin class II with double-glycine leader peptide	PF10439.9	cc1	Aulosira laxa NIES-50	1453	2	32.17	yes	MTTINIYDLSILGLDLFQDSETFLNELTEDELNYISGGFLDDVFDVLQLAIIPQENQANINGQTINAFTQNNFNTAP	WP_096580419_2	2.80E-05
4124	WP_017748579	#2e86c1	Scytonema	Rap-phr extracellular signalling	PF11131.8	cc1	Scytonema hofmannii PCC 7110	1566	2	32.57	yes	MSAIKISDLRPAGHKLFEDSENYLHELTESEMMVVGGNRLRSIVVVELDNISVFAATVVTANANTINANTIGNTNSFVGG	WP_017748579_2	2.80E-05
4155	WP_151696789	#2e86c1	Microcystis	G6B family	PF15096.6	cc1	Microcystis aeruginosa NIES-4325	388	1	27.49	yes	MANITISELRPAGADLLFDSESFLDYLNDDELCSVSGGATTPTTPTIVATTFACGVVVGIVAVGAIAWTLSK	WP_151696789_1	4.30E-06
4198	WP_099700413	#2e86c1	Chroococcales	plantaricin: plantaricin C family lantibiotic	NF000539.0	cc1	Chroococcales cyanobacterium IPPAS B-1203	1952	3	30.12	yes	MSCLNISDLSVTGLELFQDAESFMNELSDREIENITGGWFSFLTDDFMPTTSNLVVETVVKTRVVSVVTRSVWVKTKGVKNYGVSHTHKTIISVRR	WP_099700413_3	2.50E-05
4253	SAP16385	#FF0000	Nonomuraea	none	none	cc1	Nonomuraea gerenzanensis	327	2	38.46	yes	MAEKDLVDGFENYTDPEELAFDENGEEESPSTPWCIASIVITASAGC	SAP16385_2	none
4254	WP_164390060	#FF0000	Streptomyces	none	none	cc1	Streptomyces sp. PRKS01-65	156	1	34.39	yes	MNDIELAAGFDAYADVNEMADEVTPDEAPSPQTIISVIVTASFDC	WP_164390060_1	none
4257	WP_017585895	#FF0000	Nocardiopsis	none	none	cc1	Nocardiopsis ganjiahuensis DSM 45031	490	3	42.32	yes	MAEKTPFEGVDNYTDPAEITKDQDVEEPEATPASIALSVGSIVATQHWGC	WP_017585895_3	none
4259	WP_017585895	#FF0000	Nocardiopsis	none	none	cc1	Nocardiopsis ganjiahuensis DSM 45031	68	2	43.43	yes	MGEKTPFEGVDNYTDPAEITKDQDVEEPEATPASIALSVGSIVATQHWGC	WP_017585895_2	none
4262	QKI29067	#FF0000	Streptomyces	none	none	cc1	Streptomyces cacaoi	2484	1	31.9	yes	MGEVVEMVAGFDTYADVEELNQIAVGEAPESSAPCTIYASVSASISATASWGC	QKI29067_1	none
4265	ROV70439	#FF0000	Streptomyces	none	none	cc1	Streptomyces globisporus	159	1	40.32	yes	MNEIDLAAGFDTYADVNEMVADGTPDEAPSPQTIVSLSVVASIKWGC	ROV70439_1	none
4267	WP_164496180	#FF0000	Streptomyces	none	none	cc1	Streptomyces sp. ADI95-16	155	1	39.16	yes	MNEIDLAAGFDTYADVNEMATEVTPDEAPSPQTIVSLSVVASIKWGC	WP_164496180_1	none
4269	WP_044386376	#FF0000	Streptomyces	none	none	cc1	Streptomyces cyaneogriseus subsp. noncyanogenus	156	2	32.57	yes	MNDIELAAGFDAYADVNEMADEVTPDEAPSPQTIISVIVTASFDC	WP_044386376_2	none
4275	WP_051857755	#FF0000	Streptomyces	none	none	cc1	Streptomyces cellulosae	158	1	40.92	yes	MNDIELAAGFDTYADVNEMADEVTPDEAPSPQTIVSLSIVASVKWGC	WP_051857755_1	none
4362	WP_162399505	#2e86c1	Nostoc	GNAT acetyltransferase	PF12746.7	cc1	Nostoc sp. B(2019)	1934	2	31.76	yes	MTTIILSELRHAGSQLFQDSESFLNEMSDLDSISGGYDSGFSNYSGYTKLIEGYVITYAIDQIVYLAKSFSSHDSNY	WP_162399505_2	3.60E-06
4500	WP_109497443	#FF0000	Streptomyces	none	none	cc1	Streptomyces sp. Act143	6580	2	49.2	yes	MNTTDTLLAGYAAYTSADEIAAAQDGGAPEISPVSLSIAVSIAESSYACSAGLSMSVGVTVGKGC	WP_109497443_2	none
4554	WP_087542717	#2e86c1	Nostocales	none	none	cc1	Nostocales cyanobacterium HT-58-2	1758	1	42.35	yes	MPSIKVSDLRPVGHELFEGSENYLYELVDHEMMIEGGGRFQSVVVIGDVSIFAATVVTANANSINANTVGNANTLV	WP_087542717_1	none
4677	WP_084890433	#FF0000	Williamsia	Family of unknown function (DUF5546)	PF17700.1	cc1	Williamsia sp. 1135	85	4	17.97	yes	MSETVTQSLVAGYRSYAAAPELTEMSETAPSATPGILSFIGVSSTACGTAVSVVSSGGVGATIAWGC	WP_084890433_4	7.00E-07
4681	WP_084890433	#FF0000	Williamsia	none	none	cc1	Williamsia sp. 1135	376	2	31.79	yes	MPNSQSLISGYSNYARGEELAQVSVESAPGISPISVFATASSPECAAFSIGASAGVVTSTSITIGAGC	WP_084890433_2	none
4755	WP_015212417	#2e86c1	Anabaena	none	none	cc1	Anabaena cylindrica PCC 7122	1630	6	28.0	yes	MARIIIADLHPIDSEAFLNELTNQNSQTVFGGQDDYRPQILDFGVKAFEFVLVIAAIDAISFLTNSFINKDST	WP_015212417_6	none
4770	WP_089091039	#2e86c1	Nodularia	Protein of unknown function (DUF2651)	PF10852.8	cc1	Nodularia sp. NIES-3585	1398	7	22.81	yes	MAGIVISELHPTESESFLIEITDMSSISVYGGNQYEIDYAFHQMLNFTYRLMDFMLSVFAIYSIVSLAQSFITPSEFNLAHDPFYSL	WP_089091039_7	1.40E-06
4785	BAY08128	#2e86c1	Calothrix	Type-A lantibiotic	PF04604.13	cc1	Calothrix sp. NIES-2098	3449	3	26.69	yes	MANISIPDLHLSDNQNQLDELTPSEMNNLMGGSITINLPVNNSNKEFMDLFKALSDPNGKPINITIGTNSSLSNPLPSNPFDRAANPF	BAY08128_3	1.20E-05
4786	WP_096730381	#2e86c1	Nostoc	Type-A lantibiotic	PF04604.13	cc1	Nostoc carneum NIES-2107	4533	3	25.04	yes	MANINIANLHQRDNLDYLDELHNSEINHVIGGAVTIAVPVTESNQQFLDLFHTLNDPNRGPITINFGNSASVSNPVISNPFDKGINPF	WP_096730381_3	4.40E-06
4788	WP_167725682	#2e86c1	Tolypothrix	Type-A lantibiotic	PF04604.13	cc1	Tolypothrix sp. PCC 7910	3311	3	24.22	yes	MANINIANLHQRDNLDYIDELHNSEINHIIGGAVTITVPVTESNQQFLELFNTLNDPNRGPITINFGNSASVSNPVISNPFDKGINPF	WP_167725682_3	3.10E-06
5080	WP_035150190	#2e86c1	Calothrix	AAA domain	PF13087.6	cc1	Calothrix sp. 336/3	1913	2	34.19	yes	MAFIQIAELPSAGSELFNDSESFLDELTEEGVNNIQGGEKSLIIFTLIKTNLSYPTLIYPTLLSRSLVESKYTYSVGISLETKSVIHKF	WP_035150190_2	2.30E-06
5095	RCJ14929	#2e86c1	Nostoc	none	none	cc1	Nostoc sp. ATCC 43529	3396	6	26.72	yes	MANITLSELYVSGSELFEGTESFLNDLNDADSISGGNYYNFSDISGLTKLAEAYVDTYAIGHVTFVAKSYSNGTYY	RCJ14929_6	none
5194	WP_129307298	#FF0000	Streptomyces	none	none	cc1	Streptomyces sp. L2	5580	4	28.04	yes	MSEQELIEGYRYFVDVAELAASAERELPTTSIFSYVTTTCTGTVATVSV	WP_129307298_4	none
5195	WP_052269673	#FF0000	Streptomyces	none	none	cc1	Streptomyces pluripotens	4744	6	9.07	yes	MSARDLVAGYRTIVDVEEPAEAADPTLSVISMASPPLTVTNSLA	WP_052269673_6	none
5216	TVP63782	#2e86c1	Nodularia	Bacteriocin class II with double-glycine leader peptide	PF10439.9	cc1	Nodularia sp. (in: Bacteria)	1946	4	33.87	yes	MASITVSNLYPLGSDLFMDSESFMDALNDNELAEINGGVTPAVITTIATKWFIGAAVGGAIVGSIIYW	TVP63782_4	5.90E-10
5325	WP_096575011	#2e86c1	Anabaenopsis	none	none	cc1	Anabaenopsis circularis NIES-21	1643	5	28.16	yes	MALMDWKKSSSVIIESMRVSHIFTGNDEMAKIIINDLSSGDLDSYLTEVNELDSLSIYGGESEFQQILNFAYNLLNFVLSAYAIYNISSIAKSFKITRNKTTRSVFSLF	WP_096575011_5	none
5328	WP_062295185	#2e86c1	Nostoc	Peptidase M64 N-terminus	PF16217.5	cc1	Nostoc piscinale CENA21	1404	7	16.86	yes	MALMDWNVKIKSKRVSYICSGNDEMAKIIITDLSPLDLDSYLTEVNELDSLFIYGGESELQQLLNFAYIFLNFVLSTYAIYSISSIAKSFKIPHPKSTYSVFKLF	WP_062295185_7	0.00011
5399	WP_104387267	#2e86c1	Cuspidothrix	none	none	cc1	Cuspidothrix issatschenkoi CHARLIE-1	1240	4	24.78	yes	MAKLIIDDLQPTTEKISIQEISYLESVSLVGGYSNNFQELVRFGIKSMEFILLAYAIDSIYALGTSFNNS	WP_104387267_4	none
5406	TCN71580	#FF0000	Streptomyces	none	none	cc1	Streptomyces sp. BK387	137	1	38.74	yes	MMNETAELATGFDAYTDLEELAAAVEASTEAKTPGFSITPTFSLTGQH	TCN71580_1	none
5407	WP_129307298	#FF0000	Streptomyces	none	none	cc1	Streptomyces sp. L2	5381	2	47.78	yes	MSAQDLMNGFAAYTDVEELAAQATTVTKEEASLSIGLSLSFISGVSVSLTAEHTC	WP_129307298_2	none
5410	WP_103811802	#FF0000	Streptomyces	none	none	cc1	Streptomyces sp. Ru62	139	2	39.17	yes	MMNETAELATGFDAYTDLEELAAAVEASTEAKTPGFSITPTFSLTGQH	WP_103811802_2	none
5413	WP_087811088	#FF0000	Streptomyces	none	none	cc1	Streptomyces sp. CS113	140	2	37.16	yes	MEKNLDELVSGFDAYTDVDELAAAMEASSSAKTPGFSITPTFSLTGNH	WP_087811088_2	none
5528	WP_114082527	#2e86c1	Nostoc	none	none	cc1	Nostoc sp. ATCC 53789	3138	6	36.47	yes	MASIALSQLNTTGSELFQDSESFLNDLNNVDSITVYGGGNNISSVASGLGPLLAYGVKGQEFALLGFGASLTAHIVKSFSDVDTHF	WP_114082527_6	none
5644	WP_011321056	#2e86c1	Trichormus	none	none	cc1	Trichormus variabilis 0441	2690	3	43.06	yes	MAFIAVKELQATGAELFQDSESFLNELNNLDNSVHGGGDYSNTTNGVLDLAVKGFEFGVITYGIDAIGHLAKSFSSAA	WP_011321056_3	none
5660	WP_011321056	#2e86c1	Trichormus	none	none	cc1	Trichormus variabilis 0441	3810	4	40.75	yes	MAFIAVKELQVAGAELFQDSESFLNELNNLDNSVHGGGDYSNTTNGVLDLAVKGFEFGVITYGIDAIGHLAKSYSSAGYY	WP_011321056_4	none
5663	CEJ45116	#2e86c1	Chrysosporum	Bacteriophage holin family HP1	PF16080.5	cc1	Chrysosporum ovalisporum	1928	3	32.82	yes	MANITLSQLYSIGSELFHDSETFFHELSHTDSIFRDEYAVVGGIIFTALTGAFVSIYGIGHATYVAKSYSGTYPYPL	CEJ45116_3	2.00E-05
5784	WP_013321440	#2e86c1	Gloeothece	plantaricin: plantaricin C family lantibiotic	NF000539.0	cc1	Gloeothece verrucosa PCC 7822	400	1	27.16	yes	MADIKINDIKPAGAELFEDSEGFLNELKDDEVNKVVGGVGTVIGRCCSNTAWTIIGKCGNA	WP_013321440_1	8.90E-06
5806	WP_103136595	#2e86c1	Nostoc	Histone acetyltransferase subunit NuA4	PF09340.10	cc1	Nostoc sp. CENA543	1914	1	53.74	yes	MAFIAINELRATGAELFQDSESFLNELNSVDNSVHGGYDGYSSSTGTVLGIAEKGFEFGVITVGIDAIGHLAKSFSDNKPGWY	WP_103136595_1	5.60E-06
5830	WP_017318973	#2e86c1	Mastigocladopsis	none	none	cc1	Mastigocladopsis repens PCC 10914	2009	1	23.91	yes	MVHPSIQFRSPSYAYGDVIPLHPARRALTFLLGGKQMANIEINNLHPAGSELFHDSESFLNELTEREMWGVEGGLTLDTLGSVLSESLGQTLGQGSIVVTGPDSIQGLTL	WP_017318973_1	none
5945	WP_089126836	#2e86c1	Tolypothrix	plantaricin: plantaricin C family lantibiotic	NF000539.0	cc1	Tolypothrix sp. NIES-4075	1959	1	19.11	yes	MKNTDKNITNNIKNDVPVAGTDLFADSEDFLNELTDSELVQIAGGSSGLSLLLCHEPSNVSLAGCD	WP_089126836_1	5.60E-06
5948	WP_169264744	#2e86c1	Brasilonema	Domain of unknown function (DUF1870)	PF08965.10	cc1	Brasilonema sennae CENA114	1583	1	17.08	yes	MVEILCRKDLIIVIKNTLKNIQIMKNTDKNITNNIKNDVPVAGTDFFADSEDFLNELTDSELVQVRGGNSGLSVVTCDRNGTNGQSGLSLVLCD	WP_169264744_1	2.70E-05
5950	WP_169264746	#2e86c1	Brasilonema	Domain of unknown function (DUF1870)	PF08965.10	cc1	Brasilonema sennae CENA114	15	1	17.08	yes	MVEILCRKDLIIVIKNTLKNIQIMKNTDKNITNNIKNDVPVAGTDFFADSEDFLNELTDSELVQVRGGNSGLSVVTCDRNGTNGQSGLSLVLCD	WP_169264746_1	2.70E-05
5965	WP_115965582	#FF0000	Rhodococcus	Two-component Enterococcus faecalis cytolysin (EFC)	PF16934.5	cc1	Rhodococcus sp. OK269	2388	2	18.05	yes	MANARDLIANYSTYTSALEINHSAAADTTARTSPACISAASAISAVSIDNTFDHSC	WP_115965582_2	2.80E-06
5969	WP_012868258	#FF0000	Sanguibacter	none	none	cc1	Sanguibacter keddieii DSM 10542	1245	1	49.61	yes	MALNQDIIAGYTAYTDAGELAAAPAADAAGVTPTTTTLTISSAPCTAASIGAVSAISAVSVDNTFDHGC	WP_012868258_1	none
5971	WP_115965582	#FF0000	Rhodococcus	Two-component Enterococcus faecalis cytolysin (EFC)	PF16934.5	cc1	Rhodococcus sp. OK269	2148	3	17.25	yes	MANARDLIANYSTYTSALEINHSAAADTTARTSPACISAASAISAVSIDNTFDHSC	WP_115965582_3	2.80E-06
5973	WP_068028504	#FF0000	Nocardia	none	none	cc1	Nocardia mexicana	912	2	21.19	yes	MTTRDLIANYRSYTNASELSQSAMSDGATRTSPACISAGSAISAVSVDNTFDHSC	WP_068028504_2	none
5975	WP_012868258	#FF0000	Sanguibacter	Bacterial regulatory proteins, lacI family	PF00356.21	cc1	Sanguibacter keddieii DSM 10542	1582	2	47.3	yes	MTLDQDIIAGYTAYTDAGELAAAPAADAAGVTPTTTTLTISSHPCIAASIAGVSVVSAVSVDNTFDHGC	WP_012868258_2	0.00021
6148	WP_026100063	#2e86c1	Fortiea	none	none	cc1	Fortiea contorta PCC 7126	2699	1	50.85	yes	MAFIAVNELRATGAELFQDSESYLTELNNLDAVHGGIDAGATASAGATATILGLVTKGYEFGVYTVGIEGIAHLVKSFSNGGGYSGAV	WP_026100063_1	none
6157	WP_138499068	#2e86c1	Nostoc	none	none	cc1	Nostoc sp. PA-18-2419	2049	2	42.68	yes	MASIALSQLNTTGSELFQDSESFLNDLNNVDSITIYGGGSDVSNVAYGLDPLLAYGIKGQEFGLLAFGASLTAHIVKSFSDGTNYY	WP_138499068_2	none
6230	WP_129307298	#FF0000	Streptomyces	none	none	cc1	Streptomyces sp. L2	5021	3	31.21	yes	MTAHDLVEGYRTFADAEELAASPAGEYLPTTTIFTISYPTTATPTISN	WP_129307298_3	none
6232	WP_052269673	#FF0000	Streptomyces	none	none	cc1	Streptomyces pluripotens	4563	4	30.21	yes	MTPHDLVDGYRTFVDVEELAVVPTGEYAPTTAIFTVSDSTTVTSTITN	WP_052269673_4	none
6364	WP_099068319	#2e86c1	Nostoc	none	none	cc1	Nostoc linckia z15	957	3	30.93	yes	MATIKINNLSPVGSELFQDSESFLNELTDTELATRGGLLSITLPLTPTLSLTWTYTVTAVAA	WP_099068319_3	none
6384	AVH79628	#2e86c1	Nostoc	Bacteriocin class II with double-glycine leader peptide	PF10439.9	cc1	Nostoc sp. PCC 9201	1260	5	26.82	yes	MASIAISDIFPLGHDLLFDAESYMTDLNEKELDRVVGGTDVIAGIGIGLAIYALWVR	AVH79628_5	3.20E-06
6397	WP_096679519	#2e86c1	Nostoc	Coiled-coil domain containing 32	PF14989.6	cc1	Nostoc sp. NIES-2111	1344	2	35.32	no	MASIAISNILPVGHDLLSDSENFMTDLNENELERVVGGTEPVTAAIAVSIGVAAAGAFLTGLYFGLK	WP_096679519_2	5.30E-05
6407	WP_073644071	#2e86c1	Nostoc	none	none	cc1	Nostoc calcicola FACHB-389	3534	6	27.54	yes	MANITLSELYVSGFELFEGAESFLNDLNDADSISGGNYGGFSDISTLTKLAEAYVDTYAIGHVTFVAKSYSKGGWY	WP_073644071_6	none
6411	WP_096589596	#2e86c1	Calothrix	none	none	cc1	Calothrix sp. NIES-2098	3183	7	34.58	yes	MATIRIEQLSAGFELIADEETFLDELTDNDLDLNKGGITPVITSLIVFSAGYGVGKAISQIFS	WP_096589596_7	none
6423	WP_086760950	#2e86c1	Nostoc	none	none	cc1	Nostoc sp. RF31YmG	2314	7	35.37	yes	MATIRIEQLSAGFELIADEETFLDELTDSDLDLNKGGITPVITSLIVFSAGYGVGRAISEIFK	WP_086760950_7	none
6434	WP_167721203	#2e86c1	Tolypothrix	none	none	cc1	Tolypothrix sp. PCC 7910	2429	6	36.61	yes	MATIRIEQLSAGFELIADEETFLDELSDSDLDLNKGGITPVITSLIVFSAGYGVGRAISEIFK	WP_167721203_6	none
6441	WP_015207767	#2e86c1	Cylindrospermum	Calponin family repeat	PF00402.18	cc1	Cylindrospermum stagnale PCC 7417	7977	6	14.88	no	MGVNQMANLKIDELQSAGTELFEDSESFLNELNSNELANAVGGYGYGRRRHGGYGHGGHRHGGYGYGRRW	WP_015207767_6	0.013
6484	RCJ14929	#2e86c1	Nostoc	none	none	cc1	Nostoc sp. ATCC 43529	1636	2	32.94	yes	MANITLSELYVSGSELFAGGESFLNDLSDVDSISGGSEWSGFSDLSTLTKLAEAYVDTYAIGHIAFIAKSYSNSSVA	RCJ14929_2	none
6544	WP_012409787	#2e86c1	Nostoc	none	none	cc1	Nostoc punctiforme PCC 73102	2535	5	24.43	yes	MATICISDIKPAGSSLFIDQESFLNELSDEQAGSSHGGFTIFALISLGLASAALGYAVGRNDR	WP_012409787_5	none
6642	WP_087539234	#2e86c1	Nostocales	none	none	cc1	Nostocales cyanobacterium HT-58-2	1524	5	38.08	yes	MARIVISDLHPVNSEDSETFMHDLTDRDSMFVYGGMGDGFSQLFKYGGVGDEFSQFLELNMKVLDATVVGFAIYYIASLVKLFLGSPRDQF	WP_087539234_5	none
6670	WP_010996095	#2e86c1	Nostoc	none	none	cc1	Nostoc sp. PCC 7120 = FACHB-418	2809	1	43.91	yes	MAFIAVKELQATGAELFQDSESFLNELNNLDNSVHGGGYNYSNTTNGVLDLAVKGFEFGVITYGIDAIGHLAKSYSDAGNGYY	WP_010996095_1	none
6690	WP_051715083	#FF0000	Streptomyces	none	none	cc1	Streptomyces sp. NRRL S-475	63	4	26.91	yes	MDAAELIEGYAMYVSPEEADSLQIPDLDVEGQSFVPTPVATTLIVHC	WP_051715083_4	none
6692	WP_095933898	#FF0000	Streptomyces	none	none	cc1	Streptomyces sp. Tue6028	62	2	33.94	yes	MDATELIEGYAMYVSPEEAAAVEIPDLEVEGRTGPPVTIAVTLTVHC	WP_095933898_2	none
6788	AVH79628	#2e86c1	Nostoc	YtxH-like protein	PF12732.7	cc1	Nostoc sp. PCC 9201	1492	4	27.98	yes	MASITISDIRPVGHDLLLDTESYMTDLNENELNRVVGGTGVLIGIGIGIGIGLLIDAIR	AVH79628_4	0.00092
6801	AVH79662	#2e86c1	Desmonostoc	plantaricin: plantaricin C family lantibiotic	NF000539.0	cc1	Desmonostoc muscorum PCC 7121	1479	2	37.92	no	MASINILDIRPAGHDLLFDAESYMADINENELDRVVGGTEPITGAMALALGIAAGAAFMTGLWAGLR	AVH79662_2	1.80E-05
6846	WP_015659226	#FF0000	Streptomyces	Amidase	PF01425.21	cc1	Streptomyces davaonensis JCM 4913	814	2	52.19	yes	MNTAEQLIAGYTAYTNAEEFGAGATAENPAITPTLLSFIGGSSGGCGGAVSAISGASVAGTVNWGC	WP_015659226_2	3.60E-06
6975	WP_015198131	#2e86c1	Calothrix	none	none	cc1	Calothrix sp. PCC 6303	4435	3	16.16	yes	MANIKLNDLSKMNLSGVDLFDDSESFLTELNDENEQINIVGGSCKFLTFGQQTPPPWTCPQVCCHDSEQSIQ	WP_015198131_3	none
6993	WP_096590410	#2e86c1	Calothrix	none	none	cc1	Calothrix sp. NIES-2098	1316	2	21.05	yes	MADIKINDIKLNVAELFLDSESFLNELSNDELNLRGGMQIASTKSYYCGTVTTNEFSTDSVGCRTNPVAK	WP_096590410_2	none
7004	WP_141720451	#FF0000	Streptomyces	none	none	cc1	Streptomyces sp. SID4946	525	1	33.49	yes	MNTADQLIAGYTAYTSSEEFGVTAEGDAPATTPSILASIDTSSAACGATIGYSISQTIHGGC	WP_141720451_1	none
7013	WP_044206131	#2e86c1	Coleofasciculus	Two-component Enterococcus faecalis cytolysin (EFC)	PF16934.5	cc1	Coleofasciculus chthonoplastes PCC 7420	2150	1	23.3	yes	MPTIKVSDLKPEGYNLFSDSESYMKELSEDELGTGIYGGAISTPACAVVVLVAYTVSIIASAAQSKPKSPHRPG	WP_044206131_1	6.70E-07
7025	WP_127086205	#2e86c1	Calothrix	plantaricin: plantaricin C family lantibiotic	NF000539.0	cc1	Calothrix desertica PCC 7102	1463	2	28.56	yes	MATISISNLSATGADLFADSESYLNELTDSELNETKGGSLFATAVFVIGVAIGYQATKAVTAVAKKLV	WP_127086205_2	1.40E-05
7031	WP_096559014	#2e86c1	Nostoc	none	none	cc1	Nostoc sp. NIES-4103	4275	3	31.06	yes	MANITLTELHIAGSELFQDSESFLNELNNVNSISGGFYGGHVSDASTLTKLAEAFVGVYSIGHIGYLAKSFSHSNSYSGY	WP_096559014_3	none
7035	BAZ42602	#2e86c1	Calothrix	plantaricin: plantaricin C family lantibiotic	NF000539.0	cc1	Calothrix sp. NIES-4101	1705	2	32.93	yes	MATISISQLSATGANLLADSESYLNELTDAELNETKGGSLFATAIFVIGVAAGYKASKAVIEELT	BAZ42602_2	1.30E-05
7058	WP_026100063	#2e86c1	Fortiea	none	none	cc1	Fortiea contorta PCC 7126	3109	5	44.53	yes	MAFIAINELRATGAELFQDSESYLTELNTLDAIHGGTNASASVGATATILGLVTKGYEFGVYTVGIEGISKLVKSFSYGGGYSGAV	WP_026100063_5	none
7076	WP_019499235	#2e86c1	Pseudanabaena	none	none	cc1	Pseudanabaena sp. PCC 6802	3009	1	37.22	yes	MATIKINELNPAGSNLFNDSESFMADLTDEQISSTRGGCLGGVVTITATPFSSSPVCGVVGGADLALSTVVVFTVIDSTKK	WP_019499235_1	none
7082	WP_057178590	#2e86c1	Cylindrospermopsis	none	none	cc1	Cylindrospermopsis raciborskii GIHE 2018	2177	4	36.39	yes	MASIKLDQLQTTGSELFQDSESFLNDMSDINSISVHGGFGSNVSDMSIFTKLAEAFVNTYGIGHIAYLAKSYSSGV	WP_057178590_4	none
7085	WP_068385845	#2e86c1	Leptolyngbya	none	none	cc1	Leptolyngbya sp. NIES-3755	1410	1	49.65	yes	MPSIQIAQLSAIGSDLFEDSESFLHELRDDDFKMINGGLVISQVTVSLGYINPPEQIAVAYRAEDTQALQALRGLFGEWFNLFDNHAAQLSVWWKLH	WP_068385845_1	none
7101	WP_019499235	#2e86c1	Pseudanabaena	none	none	cc1	Pseudanabaena sp. PCC 6802	1756	5	23.99	yes	MATIQINELNPAGSDLFNDLESFMSDLTDEQINSKRGGCVVSVASIPYRLNPYITALAICPASSTPVCALV	WP_019499235_5	none
7201	WP_124271963	#FF0000	Streptomyces	none	none	cc1	Streptomyces sp. ADI96-02	3148	1	58.73	yes	MQNVTEKDLFDGYTAYTSAEELGLHDGKEAAPAFSPTIPWAIRATIITARSSQQCAAALGSLAAKTVENKC	WP_124271963_1	none
7205	WP_107115831	#FF0000	Streptomyces	none	none	cc1	Streptomyces globisporus C-1027	3146	1	57.82	yes	MQNVTEKDLFDGYTAYTSAEELGLHDGQEAAPAFSPTIPWAIRATIITARSSQQCAAALGSLAAKTVENKC	WP_107115831_1	none
7213	WP_096622718	#FF0000	Streptomyces	none	none	cc1	Streptomyces sp. WZ.A104	3209	1	60.19	yes	MQNVTEKDLFDGYTAYTSAEELGLHDGKEAAPAFSPTIPWAIRATIISARSSQQCAAALGSLAAKTVENKC	WP_096622718_1	none
7215	WP_022929317	#FF0000	Patulibacter	none	none	cc1	Patulibacter americanus DSM 16676	2170	2	45.32	yes	MHAEHRFDDLLSGLTAYTSAEELTKDVAAADGYDAAAVSPATPATPSSWPCVQASASLVSSSITGTWAVGC	WP_022929317_2	none
7220	WP_029630331	#2e86c1	Tolypothrix	none	none	cc1	Tolypothrix [Scytonema hofmanni] UTEX 2349	1440	2	34.44	yes	MTTIRISNLNVSGLDLLSDEESYLNEINKEEFDWIHGGGSPVGVAVVAGIVGIFAGSVAVSKELKKFHDRRDGFTSFL	WP_029630331_2	none
7297	WP_166282462	#2e86c1	Aphanocapsa	none	none	cc1	Aphanocapsa montana BDHKU210001	4531	1	33.18	yes	MSKIQVNDLNNSGADLFEDSESYMNDLERDSLGAVGAGLMLSPAPSLGPSIIVITRTSIPTLTNPTLTNSTVITKTSISPVTL	WP_166282462_1	none
7309	BBD66616	#2e86c1	Nostoc	Two-component Enterococcus faecalis cytolysin (EFC)	PF16934.5	cc1	Nostoc commune HK-02	3464	1	40.44	yes	MARIQITDLNPSQSELLLCELTAEEMLEINGGGWFKRIIGAALIVVGAFTTPVGIGAALIGAGGAIIASEEF	BBD66616_1	0.00034
7337	WP_104899482	#2e86c1	Nostoc	none	none	cc1	Nostoc sp. Peltigera membranacea cyanobiont N6	1335	7	21.27	yes	MSKITISDIAINPDDESLVDELTEQLINGIFGGWSITITITIKF	WP_104899482_7	none
7341	WP_062071413	#FF0000	Arthrobacter	none	none	cc1	Arthrobacter sp. EpRS71	112	2	28.74	yes	MSNAVVNFHQADLTDLARAHSTFAAAEELGGDAATEAPATSPLCIGIIVGATLGAGC	WP_062071413_2	none
7445	AVH79535	#2e86c1	Synechocystis	none	none	cc1	Synechocystis sp. PCC 9413	2815	7	20.19	yes	MAIILIRDLNPVGYSLFSDRESYLRDLSADDELGVSGGGTPTISTVTTSSVPCMVGSFVLTVVGSIAYTLYK	AVH79535_7	none
7449	WP_133890759	#FF0000	Streptomyces	none	none	cc1	Streptomyces sp. BK208	2995	4	36.0	yes	MNEKLIAGYAAYTDADEFGTTALGEALASVESVSWVLSAASAGASVAATFDVGC	WP_133890759_4	none
7454	WP_053560627	#FF0000	Streptomyces	Two-component Enterococcus faecalis cytolysin (EFC)	PF16934.5	cc1	Streptomyces sp. CFMR 7	6188	3	38.91	yes	MNASAHLIAGYTAYTTAAEFDASITADAPAVTPATPSIALSIAESSYACGAGVGASIGITFTKGC	WP_053560627_3	2.00E-05
7464	WP_161481447	#FF0000	Herbidospora	none	none	cc1	Herbidospora sp. NEAU-GS84	1789	1	38.11	no	MNDLIAGYANYASTEAILQERQLAAREPETGLFTLTITISLTITVTISL	WP_161481447_1	none
7465	WP_161481447	#FF0000	Herbidospora	none	none	cc1	Herbidospora sp. NEAU-GS84	1460	5	30.64	no	MSELIAGYANYASTESLLQEHSEAGHWTEWTLWFTVTMSVTPTTSY	WP_161481447_5	none
7467	WP_161481447	#FF0000	Herbidospora	none	none	cc1	Herbidospora sp. NEAU-GS84	1623	3	31.78	no	MSELIAGYANYASTEAILQEQAAGRVLEAGLFFSVTFSFTHSNSISFSI	WP_161481447_3	none
7471	WP_161481447	#FF0000	Herbidospora	none	none	cc1	Herbidospora sp. NEAU-GS84	2123	6	30.18	no	MNDLIAGYANYASTEAILHERQIASRDAESISATVTVTWTLTVSWSYSWSY	WP_161481447_6	none
7614	WP_051817283	#FF0000	Kitasatospora	none	none	cc1	Kitasatospora sp. NRRL B-11411	1261	2	50.8	yes	MQDDLFATDELLAGYSTYTAPEELVAAGAAPQIIGTITMTETGLTILTPETSVTSIPCYLA	WP_051817283_2	none
7630	WP_015197629	#2e86c1	Calothrix	listolys_S: listeriolysin S family toxin	NF033222.1	cc1	Calothrix sp. PCC 6303	1681	2	32.77	yes	MLKLYDLLVPGFDLLQDSETFLTDLTDNELNSIQAGFLETLFFDCGQLVILGDENLINANINGQTVNALTQNNVNTSI	WP_015197629_2	2.90E-05
7651	WP_015155263	#2e86c1	Cyanosarcina	Abscisic acid G-protein coupled receptor	PF12430.8	cc1	Cyanosarcina cf. burmensis CCALA 770	1231	4	22.61	yes	MARIKISDLQPAESESFFTELTDADLAIRSGSANELNQLLSAVLIVYAISQIVSLVQSFSSTNQNSGTPLNNILSNIQGNNEL	WP_015155263_4	1.60E-06
7663	WP_093831028	#FF0000	Streptomyces	none	none	cc1	Streptomyces sp. SID4950	4673	1	41.8	yes	MSAQDLMNGYALYTDAEELAAQVVDAPAQESSPICLSFISGISVSLTAEHTC	WP_093831028_1	none
7675	WP_017585895	#FF0000	Nocardiopsis	none	none	cc1	Nocardiopsis ganjiahuensis DSM 45031	246	1	49.29	yes	MSTETLMNGADNYTDPAEITKDQDVEEPGVVVTTVVPGPITITIPPISVTATVRIGC	WP_017585895_1	none
7681	WP_096730381	#2e86c1	Nostoc	Protein of unknown function (DUF4064)	PF13273.6	cc1	Nostoc carneum NIES-2107	1591	4	16.19	yes	MNRIVIFDLHQSGSNEINHSESFIEDVTEIDSMCIHGGEGYAFSEFLNFGVKVLEYALIGFAISSIVSLVQMFLAPRQNQNSSLPTIYPPIS	WP_096730381_4	2.40E-06
7957	WP_109497443	#FF0000	Streptomyces	none	none	cc1	Streptomyces sp. Act143	6201	3	46.82	yes	MNTTDTLLAGYAAYTSADEIAAAQDGGAPEISPVSLSIAVSIAESSYACSAGLSMSVGVTVGKGC	WP_109497443_3	none
7983	WP_099071810	#2e86c1	Nostoc	none	none	cc1	Nostoc linckia z15	2439	3	34.34	yes	MANITLSELYVSGSELFVGTESFLNDLSDADAISGGNYGGFSDISTLTKLAEAYVDTYAIGHITFVAKSYSNGTYY	WP_099071810_3	none
8005	RCJ14929	#2e86c1	Nostoc	none	none	cc1	Nostoc sp. ATCC 43529	2005	4	31.03	yes	MANITLSELYVSGSELFEGTESFLNDLSDVDSISGGSQWSGFSDISTLTKLAEAYVDTYAIGHITFVAKSYSNGTYY	RCJ14929_4	none
8041	WP_096569967	#2e86c1	Sphaerospermopsis	none	none	cc1	Sphaerospermopsis kisseleviana NIES-73	1807	1	47.87	yes	MASIKLSELQVAGSELFQDSESFLNEMSDANSVYGGGNDYVSDASTLTKLAEAFVNTYGIGHIGYLAKSYSDGYGYGY	WP_096569967_1	none
8074	WP_096569967	#2e86c1	Sphaerospermopsis	none	none	cc1	Sphaerospermopsis kisseleviana NIES-73	2105	2	45.66	yes	MASIKLSELQVAGSELFQDSESFLNEMSDANSVYGGGNDYVSDMSTLTKLAEAFVNTYGIGHIGYLAKSYSDKGYW	WP_096569967_2	none
8082	WP_015212417	#2e86c1	Anabaena	Peptidase family M41	PF01434.18	cc1	Anabaena cylindrica PCC 7122	2619	4	31.67	yes	MASIXLSELQVTGSELFQDSESFLNEMSDVNSIYGGYYGGEVSDISTLTKLAEAFVNVYGIGHIGLLS	WP_015212417_4	3.80E-06
8319	AVH79662	#2e86c1	Desmonostoc	Bacteriocin class II with double-glycine leader peptide	PF10439.9	cc1	Desmonostoc muscorum PCC 7121	1201	3	35.06	no	MASIAISDIHPAGYDLLFDGESYMTDLNSNELDRVIGGTEPVSLFFLGAAVVIGAGALGYAVGRALS	AVH79662_3	4.10E-08
8552	WP_138498533	#2e86c1	Nostoc	NADH-ubiquinone reductase complex 1 MLRQ subunit	PF06522.11	cc1	Nostoc sp. PA-18-2419	1363	2	36.12	yes	MANIAISNLRPAGADLFDXSEXFMNDLTDSELDMTKGGLTPAVFFAGVAAGIAITYLLK	WP_138498533_2	2.00E-05
8571	WP_087592205	#2e86c1	Cyanobacteria	plantaricin: plantaricin C family lantibiotic	NF000539.0	cc1	Cyanobacteria unicellular cyanobacterium SU3	387	9	19.69	yes	MADIKISNLNPVGSDFFNDSESFMTELTDEQIKTTHGGSTTVCYVVIGYLIAKK	WP_087592205_9	7.80E-06
8577	WP_096589596	#2e86c1	Calothrix	none	none	cc1	Calothrix sp. NIES-2098	2069	3	50.68	yes	MAAIAIHDLRPAGADLFAGSENFMSDLVDSELNAVNGGISPLVIWGVAITSEYVISAFGVGVGAGIYTALK	WP_096589596_3	none
8794	WP_019499235	#2e86c1	Pseudanabaena	none	none	cc1	Pseudanabaena sp. PCC 6802	2566	4	28.86	yes	MANIDISELNISGSDLFDDTETYLQELSEEELGIQGGIIDGCIPPLLPTPLTTDGMSTYVCSNCISITGSPLCVPPTANTAN	WP_019499235_4	none
8806	WP_019496925	#2e86c1	Calothrix	none	none	cc1	Calothrix sp. PCC 7103	710	2	19.87	yes	MATITISNLNLSGSELLIDTETYLHELTEAELDMTKGGYFYITSPIVYPTSIFTVKPVFPDIMQTIILR	WP_019496925_2	none
8811	WP_018550639	#FF0000	Streptomyces	none	none	cc1	Streptomyces sp. SID4913	1171	1	61.3	yes	MQNEQQGIDELLAGYSTYTDSEELVAAGAAPSVIATITLTNTETTILTPETSITTLPCYLA	WP_018550639_1	none
9284	WP_089126833	#2e86c1	Tolypothrix	plantaricin: plantaricin C family lantibiotic	NF000539.0	cc1	Tolypothrix sp. NIES-4075	81	1	19.11	yes	MKNTDKNITNNIKNDVPVAGTDLFADSEDFLNELTDSELVQIAGGSSGLSLLLCHEPSNVSLAGCD	WP_089126833_1	5.60E-06
9352	WP_017749323	#2e86c1	Scytonema	none	none	cc1	Scytonema hofmannii PCC 7110	1414	1	33.17	yes	MASIEINNLRPVGYDLFHDSESFINELSDREMWGLEGGILGALGGTLAGLGLQSLISGNSGFNVTGADSFNNLIDLGNLFGGRPKG	WP_017749323_1	none
9382	WP_055533290	#FF0000	Streptomyces	none	none	cc1	Streptomyces alboniger	42	1	49.5	yes	MQVVEVPQFTDTADTIDTGELFAGYRTYTDAGELDSVFGQEEATAATVTIISTATIIVSCLC	WP_055533290_1	none
9434	WP_019501955	#2e86c1	Pseudanabaena	Two-component Enterococcus faecalis cytolysin (EFC)	PF16934.5	cc1	Pseudanabaena sp. PCC 6802	2852	3	28.75	yes	MANISISTLQPTGDESIDMLSVEEMEDIAGGNILIYGGPIVVGFAVGTAIRMGIDKLVSWLF	WP_019501955_3	1.90E-05
9747	WP_068099584	#FF0000	Rhodococcus	Transferase family	PF02458.15	cc1	Rhodococcus sp. PBTS 1	87	3	41.03	yes	MSDTHDILDGLSSYAAPDEIAETNAGDVPATTVPCSALASITTAELGC	WP_068099584_3	1.00E-05
9756	WP_008380405	#FF0000	Gordonia	none	none	cc1	Gordonia malaquae NBRC 108250	3868	2	25.4	yes	MNEKLIAGYRQFASADEFGAASAATPAITPTITITVSVASAVSGWQTNEHGC	WP_008380405_2	none
10216	WP_017581465	#FF0000	Nocardiopsis	none	none	cc1	Nocardiopsis valliformis DSM 45023	68	2	48.54	yes	MGEQNPFEGVDTYTDPAEITEDHGVEDPEASPASVASAIGSFNASVALTNTFGC	WP_017581465_2	none
10258	WP_105222244	#2e86c1	Gloeocapsopsis	none	none	cc1	Gloeocapsopsis sp. AAB1 = 1H9	1226	1	35.84	yes	MASIKISELKPAGNELFQDEESFLDELNERETLFITGGKKKGDNLDISVLTVYTESIGISLQTFSVVTQVKKIKIKIKY	WP_105222244_1	none
10291	ANI93503	#FF0000	Dietzia	none	none	cc1	Dietzia timorensis	696	2	28.16	yes	MHNDILDGFNTYATPAELADTNAADTPATTVPCSALASYGTAKLGC	ANI93503_2	none
10354	AVH79535	#2e86c1	Synechocystis	none	none	cc1	Synechocystis sp. PCC 9413	951	5	23.29	yes	MSKIAICDLRLAGANLLSDPESYMYELDDCNVKSTEVNGGCLFLTPGIYFGMVVSAAILNQ	AVH79535_5	none
10362	AVH79535	#2e86c1	Synechocystis	Bacteriocin class II with double-glycine leader peptide	PF10439.9	cc1	Synechocystis sp. PCC 9413	2557	3	30.19	yes	MSAIQILDLTHNSANLFDDPESYLDELSNESLTLSEIQGGATPALGCVVSIVSFVAFAAAGAAIGAAVSNAIRQ	AVH79535_3	8.90E-08
10421	WP_096536886	#2e86c1	Nostoc	Transposon-encoded protein TnpW	PF14202.6	cc1	Nostoc linckia NIES-25	2111	6	24.24	yes	MANITLSELYVSGSELFEGTESFLNDLGDADSISGGNYSGFSDISTLTKLAEAYVDTYAIGHITFVAKSYSSSSAY	WP_096536886_6	1.50E-05
10792	WP_030169499	#FF0000	Kitasatospora	none	none	cc1	Kitasatospora arboriphila	381	3	28.94	yes	MTNSQSLISGYANYVRSEELAHVNAESAPGISPVSAFVSASSPECAAFSVGASAGVVTSTSITVGAGC	WP_030169499_3	none
10813	WP_148763415	#2e86c1	Dolichospermum	TonB-dependent Receptor Plug Domain	PF07715.15	cc1	Dolichospermum sp. UHCC 0315A	1640	2	39.39	yes	MATITLSQLNTTGSELFADSESYLNELNDAASVSINGGGGDFSGFSAYGDFGVKYLEFLVDGYAIASIKHIAKSFSNDSHYGH	WP_148763415_2	4.50E-06
11115	WP_163927072	#2e86c1	Nostoc	none	none	cc1	Nostoc sp. UIC 10630	1338	3	22.73	yes	MSNITINDLNLPGFYLLSGEESYLNEINDNELDLTRGGFLFTLITLFGGGGTASVIARKIHDYNRGPIAHL	WP_163927072_3	none
11117	WP_019501037	#2e86c1	Pseudanabaena	none	none	cc1	Pseudanabaena sp. PCC 6802	1742	2	22.78	yes	MATINIQDLKVTGSNLFSDEESFLNELTSEELDITTGRFSPVVYTLAVGSAFVLSYNIGKISAEIYNKFW	WP_019501037_2	none
11220	ALC22075	#FF0000	Streptomyces	none	none	cc1	Streptomyces pristinaespiralis	117	2	50.05	yes	MSGPADAGPRIQENTMQNNTEIMDLIANYDAYADVDELNVTAAADAPATTPVCAASVASSTWCASAASAISGATYEAGC	ALC22075_2	none
11423	WP_062295185	#2e86c1	Nostoc	Nup85 Nucleoporin	PF07575.13	cc1	Nostoc piscinale CENA21	4174	2	41.75	yes	MARITISDLYPSSDEQYITELTAGEATKVEAGASSSFITIDTNDLIKTQQNINSILRDVSVELEQTISNLQQQQQQPNNRYGQRSRYGGYYTDY	WP_062295185_2	4.00E-06
11424	WP_096575011	#2e86c1	Anabaenopsis	none	none	cc1	Anabaenopsis circularis NIES-21	4430	1	43.2	yes	MARITISDLYLNNDEQHITELTAWEARTIEAGASTVTIDTSDLLQLQQNINDILQGVSNQLQQQRQQQQQQPNNRYGRRQPYDDYYAYY	WP_096575011_1	none
11426	WP_015157989	#2e86c1	Chamaesiphon	none	none	cc1	Chamaesiphon minutus PCC 6605	1816	1	27.83	yes	MASISISNLNPAGSDLLADSESFLTELQANDSSQIFGGSGYGGSKKSSKKSSKKSSKKRSKKGSKKGSKGYCFPCVPVYPCH	WP_015157989_1	none
11582	WP_168643398	#2e86c1	Dolichospermum	none	none	cc1	Dolichospermum sp. UHCC 0259	2813	6	24.95	yes	MASIRINDIQAQDSFLNELSDEQLELTRGGVLFFAILALGVSSAALGYVMGRNDRQ	WP_168643398_6	none
11634	WP_086689015	#2e86c1	Nostoc	Type-A lantibiotic	PF04604.13	cc1	Nostoc sp. T09	2753	3	18.23	yes	MASITIPDLHPTENLNSLDELTPREMSNVIGGVQVKINWTQRDIKLFQLIQALQDPNRDPEKNPITIKFF	WP_086689015_3	5.00E-07
11711	WP_096590413	#2e86c1	Calothrix	none	none	cc1	Calothrix sp. NIES-2098	369	2	21.05	yes	MADIKINDIKLNVAELFLDSESFLNELSNDELNLRGGMQIASTKSYYCGTVTTNEFSTDSVGCRTNPVAK	WP_096590413_2	none
11994	WP_096688632	#2e86c1	Calothrix	Bacteriocin class II with double-glycine leader peptide	PF10439.9	cc1	Calothrix sp. NIES-4071	2017	3	24.71	yes	MATINISDLRPTGSELFSDSEGYMSELSDNELISVNGGILTSPVCAAVVSRIVSPRLTREVARYLKRPNN	WP_096688632_3	2.80E-05
12000	WP_016950446	#2e86c1	Anabaena	none	none	cc1	Anabaena sp. PCC 7108	2334	2	36.89	yes	MASIKLSELQATGSELFQDSESFLNEMTDVNSIYGGSYGSHVSDMSTFGKLAEAFVNVYAVGHIAYLAKSYSHSNGYSNGYGY	WP_016950446_2	none
12003	WP_017749323	#2e86c1	Scytonema	Bacteriocin class II with double-glycine leader peptide	PF10439.9	cc1	Scytonema hofmannii PCC 7110	1793	3	22.86	yes	MSNIEIKNLQLAGSELFQDSESYLNEMSDREVWSVQGGLTLDTLVFTLPATISDPLAGATVGTLSMITGGTLAGLSLTGAV	WP_017749323_3	4.30E-06
12005	WP_096689510	#2e86c1	Calothrix	Bacterial toxin 4	PF15541.6	cc1	Calothrix sp. NIES-4071	2144	3	19.21	yes	MPNIRILELRQNGHELFEDSESFLVELTNQELSMVNGGSSVSQVTYSVGYEYLPTDSNLTFVEPDANSDLLSLSVAI	WP_096689510_3	4.10E-05
12012	WP_029630331	#2e86c1	Tolypothrix	none	none	cc1	Tolypothrix [Scytonema hofmanni] UTEX 2349	2161	3	31.63	yes	MATINISDLHPTGSDLFSDSESYINELGDGELDATYGGSTPIIWSVRVSVVLTIAAVTLFTGQGEAN	WP_029630331_3	none
12027	WP_141720451	#FF0000	Streptomyces	none	none	cc1	Streptomyces sp. SID4946	282	2	33.06	yes	MNTADQLIAGYIAYTSAEEFGVTAEGDAPATTPVTVTTVSSTECVSLTASVVGTTLSGHC	WP_141720451_2	none
12164	WP_017581465	#FF0000	Nocardiopsis	none	none	cc1	Nocardiopsis valliformis DSM 45023	297	4	44.02	yes	MSEKTPFDGADNYTDPAEITEDQEIENPEVTPASVAASVSVVIATNRFGC	WP_017581465_4	none
12173	WP_017581465	#FF0000	Nocardiopsis	none	none	cc1	Nocardiopsis valliformis DSM 45023	752	3	45.19	yes	MAEKTPFDGADNYTDPAEITEDHGVEDPEATPSVVVSIAASASAVSGGGVTATRHFGC	WP_017581465_3	none
12352	WP_096285992	#FF0000	Arthrobacter	none	none	cc1	Arthrobacter sp. MYb216	603	3	28.66	yes	MDNNALAPQANLTDLAQAHNTFTTAGELGADAATEAPATSPFCAGVLIGATLTMGC	WP_096285992_3	none
12884	WP_029630331	#2e86c1	Tolypothrix	Two-component Enterococcus faecalis cytolysin (EFC)	PF16934.5	cc1	Tolypothrix [Scytonema hofmanni] UTEX 2349	1865	1	34.95	yes	MATINISDLHPAGSDLFSDSEGYMRDLVDSEFDGLYGGLPFLVWTVGYYAVRSSKWCVAGAAAGVAALGGIVGWNNA	WP_029630331_1	1.70E-05
13094	WP_049802506	#2e86c1	Gloeothece	plantaricin: plantaricin C family lantibiotic	NF000539.0	cc1	Gloeothece verrucosa PCC 7822	1263	1	27.16	yes	MADIKINDIKPAGAELFEDSEGFLNELKDDEVNKVVGGVGTVIGRCCSNTAWTIIGKCGNA	WP_049802506_1	8.90E-06
13167	WP_083744359	#FF0000	Microbispora	none	none	cc1	Microbispora rosea	4955	3	54.29	yes	MSDTELLINGYAAYTDAEEFGASVSAEAPGTTPATITTVSSVECVMFSVGFASATFAGGC	WP_083744359_3	none
13181	WP_094742457	#FF0000	Rhodococcus	none	none	cc1	Rhodococcus sp. 14-2483-1-2	2565	2	14.81	yes	MSLATAYKTYTSDEELASNGIAGASAPASTPALAILLMRATMISARSSTQCAAGIAGGTPNIGNTIKRVC	WP_094742457_2	none
13393	WP_051436687	#FF0000	Streptomyces	none	none	cc1	Streptomyces sp. CNT371	138	2	38.26	yes	MNATELMAGYTAYATAEDLSVSEVAEPGHTTQITTLDMPHTTQITTFAGE	WP_051436687_2	none
13811	WP_087539234	#2e86c1	Nostocales	Stress-inducible humoral factor Turandot	PF07240.11	cc1	Nostocales cyanobacterium HT-58-2	5199	8	22.01	yes	MAILTISDLHPTDNEKLLDALTDMETKVIVGGVSANGGISLKLRNLSPYQLQFFRIATALSDPDRGPLTLRF	WP_087539234_8	1.40E-05
13845	WP_106300787	#2e86c1	Chamaesiphon	plantaricin: plantaricin C family lantibiotic	NF000539.0	cc1	Chamaesiphon polymorphus CCALA 037	3923	4	23.81	yes	MTTIAIFDLPTNGLDLFSDSENYMTELNNKDLVDINGGIGLIGASLVVTAISAYTALNQFLYGGNNGLNNPRF	WP_106300787_4	2.80E-06
14036	WP_051438280	#FF0000	Streptomyces	none	none	cc1	Streptomyces sp. CNH099	136	1	47.42	yes	MDIAELIEGYTAYTTPEDLSVSGVTEPGHTTQITTLDMPHTTQITTFAGD	WP_051438280_1	none
14162	RCJ40850	#2e86c1	Nostoc	none	none	cc1	Nostoc minutum NIES-26	2119	3	17.93	yes	TGSELFEDSETFLKELNDDEMTVTLGGGDSLLSISADTVDKSFISVGGDVSISK	RCJ40850_3	none
14722	WP_130475988	#FF0000	Amycolatopsis	none	none	cc1	Amycolatopsis sp. 8-3EHSu	2794	1	39.65	yes	MNEKDLFAGFDNYTTSAELGLFDDGMDEAGFTPSSAPCVRLTAETIARTIASPC	WP_130475988_1	none
14864	WP_129307298	#FF0000	Streptomyces	none	none	cc1	Streptomyces sp. L2	4832	1	48.63	yes	MSAQNLMNGFDAYTDAEELAAQPTTVTKEEQSMSLAITLVTISVVHTYDTGC	WP_129307298_1	none
14958	WP_114054648	#FF0000	Streptomyces	Domain of unknown function, YrpD	PF15493.6	cc1	Streptomyces globosus	6467	1	47.42	yes	MQNIENVEIMELVGGFEAYAQAAELNFEASADAPAITPTLTTIAYTKVTVAGTAASIKWTC	WP_114054648_1	9.40E-07
14965	WP_161481447	#FF0000	Herbidospora	none	none	cc1	Herbidospora sp. NEAU-GS84	1952	4	31.28	no	MHELVAGYANYASTEALLREQLSGLEAGYYPTIFSVTAPNSVTLSWTSTL	WP_161481447_4	none
14969	WP_057178590	#2e86c1	Cylindrospermopsis	none	none	cc1	Cylindrospermopsis raciborskii GIHE 2018	1566	3	37.71	yes	MASIKLGQLQTTGSELFQDSESFLNEMSDVNSISVYGGGSYDFSDMSIFTKLAEAFVNTYGIGHIAYLAKSYSDYDY	WP_057178590_3	none
15226	WP_124155194	#2e86c1	Okeania	Uncharacterized protein conserved in bacteria (DUF2314)	PF10077.9	cc1	Okeania hirsuta	592	1	33.45	yes	MANIKITELNSELMTEAIANAQARRNNFISELSEEEAAEVLGGIIFRVPFLGITFDF	WP_124155194_1	1.90E-05
15315	RCJ19623	#2e86c1	Nostoc	Bacteriocin class II with double-glycine leader peptide	PF10439.9	cc1	Nostoc minutum NIES-26	2304	3	26.36	yes	MANIEISDLNPAGSELFKDSESFMSDLIDSEVGSIQGGWRWSGWKCGLSIVASAGLGSPGIAVTVWAATTSRIKP	RCJ19623_3	1.90E-06
15465	WP_040022866	#FF0000	Streptomyces	none	none	cc1	Streptomyces sp. 150FB	349	2	43.43	yes	MNDIELATGFDTYADVIEMADEVTPDEAPSPQTIVSLSVVASIKWGC	WP_040022866_2	none
15470	WP_121024930	#FF0000	Streptomyces	none	none	cc1	Streptomyces sp. 3212.4	160	1	39.98	yes	MNDIELAAGFDTYADVNEMADEVTPDEAPSPQTIVSLSVVASIKWSC	WP_121024930_1	none
15495	WP_079189213	#FF0000	Streptomyces	none	none	cc1	Streptomyces kebangsaanensis	224	1	38.55	yes	MDKSMAIMELVSNYDAYADVDELNITAAADAPATTPVCAASVASSSWCAASASAVSGATYELTC	WP_079189213_1	none
15546	OLE73832	#2e86c1	Cyanobacteria	none	none	cc1	Cyanobacteria bacterium 13_1_40CM_2_61_4	1102	2	-49.34	no	MSTWSILRQQGSQVLATKDS	OLE73832_2	none
15548	WP_020390834	#FF0000	Kribbella	none	none	cc1	Kribbella catacumbae DSM 19601	5631	2	17.43	yes	MENSGELSLMGGVVEYTTPAEVLAEDASDAPEFTPTIAVTFLVAC	WP_020390834_2	none
15549	WP_020390834	#FF0000	Kribbella	none	none	cc1	Kribbella catacumbae DSM 19601	5295	1	21.43	yes	MENSGELSLMGGVVEYTTPAEVLAEGASDAPEVVTTTTTIVTATILLAC	WP_020390834_1	none
16529	WP_071383933	#FF0000	Streptomyces	none	none	cc1	Streptomyces monashensis	514	3	38.89	yes	MNTADQLIAGYTAYTSAEEFGVTAEGDAPATTPVTVTTVSSPECVQVSITVVGTTISGNC	WP_071383933_3	none
17291	WP_068099584	#FF0000	Rhodococcus	none	none	cc1	Rhodococcus sp. PBTS 1	310	2	43.05	yes	MSENTTHDILTGFDAYAAPEEITETTAADTPATTVPCSALASYTTAKLSC	WP_068099584_2	none
17306	WP_015113151	#2e86c1	Nostoc	DNA primase DnaG DnaB-binding	PF08278.11	cc1	Nostoc sp. PCC 7107	3621	2	33.57	yes	MARITISDLYLNNNEQHITELTAWEARTVEAGASTITIDTSDLLKLQQNINDILQGVSNQLRQQQQQQQQPNNSYGLRQPYDNYVYY	WP_015113151_2	2.60E-06
17529	WP_084520237	#FF0000	Nocardia	none	none	cc1	Nocardia mexicana	5496	1	21.19	yes	MTTRDLIANYRSYTNASELSQSAMSDGATRTSPACISAGSAISAVSVDNTFDHSC	WP_084520237_1	none
17862	WP_086820178	#FF0000	Allokutzneria	none	none	cc1	Allokutzneria sp. NRRL B-24872	54	3	47.22	yes	MLLQDDRMAAELAAGYDTYTTSTELTMAVGDGYEIVAKSTSTATPVITTTTLIFSCGPRC	WP_086820178_3	none
17868	WP_096537472	#2e86c1	Nostoc	plantaricin: plantaricin C family lantibiotic	NF000539.0	cc1	Nostoc linckia NIES-25	110	4	18.63	yes	MANIKLHDLSPAGSELFQDSESFLNELNAEELNNVNGGLLGITLTITITITITFTL	WP_096537472_4	1.10E-05
17873	WP_166282462	#2e86c1	Aphanocapsa	none	none	cc1	Aphanocapsa montana BDHKU210001	1510	2	28.02	yes	MPNIQLNDLSSNGSELFSDSETYLNDLTQEELSTQGGAFSTPICAVIVLSAYSVSIIASAAKSNPKSPHRP	WP_166282462_2	none
17901	WP_015207763	#2e86c1	Cylindrospermum	plantaricin: plantaricin C family lantibiotic	NF000539.0	cc1	Cylindrospermum stagnale PCC 7417	1374	4	18.54	yes	MANIKVNDIKPAGAELFTDSESFFDELNESDLNKLIGGLNSTFAYTCTGAAGCRRQPLRR	WP_015207763_4	4.10E-06
18251	WP_003963573	#FF0000	Streptomyces	none	none	cc1	Streptomyces clavuligerus	7098	2	42.49	yes	MNTEDLMGGYAAYTSPNAAVQEAATTHAEAFTPTITVTPTTEVIVSVVVSLLTPHV	WP_003963573_2	none
18397	WP_162944541	#2e86c1	Flavisolibacter	none	none	cc1	Flavisolibacter sp. X7X	3003	1	7.91	yes	MILTAAFIEGVALFAVIAGILAMFV	WP_162944541_1	none
18399	WP_015155263	#2e86c1	Cyanosarcina	none	none	cc1	Cyanosarcina cf. burmensis CCALA 770	3172	2	33.18	yes	MARITILELSFEDSQLSRNSNSFLNDLTAGEIEAVVGGSVAASVLANIEDLVTDFDAQMEQLFDSWGQQFSTNTGSSSSTNTTPTSDNGSRRSRVYGTYGAYS	WP_015155263_2	none
18671	WP_027402982	#2e86c1	Aphanizomenon	none	none	cc1	Aphanizomenon flos-aquae NIES-81	1695	6	22.47	yes	MASIXXXXXXXXXXXXXXXXXXXXXXXXXXXXXXXXXXXXXXXXXXXXHDLVYYSIKGKEFVLLGFAIDNVVSLAKSFSHSDHYSHL	WP_027402982_6	none
18839	WP_016864763	#2e86c1	Fischerella	none	none	cc1	Fischerella muscicola CCMEE 5323	1940	4	24.53	yes	MSTIKVSDLSHIGLELFSDSENYMLELDNNEFDNIAGGFQNGCFPDTFTNPPKPYPLSKLDSKTYPGSFDPIY	WP_016864763_4	none
18846	WP_035150190	#2e86c1	Calothrix	Type-A lantibiotic	PF04604.13	cc1	Calothrix sp. 336/3	2443	5	30.74	yes	MSHIKITNLHLSGKEFFDDSETFLNELTHQDITKIIGGEGEAIVSQVTYSIGMISADNNLFIPEVSIEFDTTSTESNLFLLS	WP_035150190_5	1.80E-06
19913	WP_052269673	#FF0000	Streptomyces	Sporulation initiation factor Spo0A C terminal	PF08769.11	cc1	Streptomyces pluripotens	5261	5	25.09	yes	MSDQELIEGYRYFVDAADLAASAEQQLPTTSIFSYITTTCTTTVATVSVY	WP_052269673_5	2.20E-06
21460	TWH40986	#2e86c1	Calothrix	none	none	cc1	Calothrix desertica PCC 7102	5391	3	-1.75	yes	MPSNSGLPHSAVIRLTLALAQHYG	TWH40986_3	none
22276	AFY52807	#2e86c1	Rivularia	Type-A lantibiotic	PF04604.13	cc1	Rivularia sp. PCC 7116	1968	1	40.21	yes	MAKIQIKDVNLDGAELFNDSETFLNELQDGEIEQVVGGKTLVAKDRLAVYTVHYPDEPIHPGRPPVHPGRPVHPIKPVHPRKPIKFPHFPHPYTPVIL	AFY52807_1	4.90E-06
22690	WP_167407701	#2e86c1	Nostoc	none	none	cc1	Nostoc flagelliforme CCNUN1	1130	3	17.14	yes	MASIKMSNLYPVGSELFKDSDSFMTELIDNELGSIKGSYDSCWCKPGIYSPLCKPSLPHYITTTLPPVI	WP_167407701_3	none
23167	WP_006195640	#2e86c1	Nodularia	Protein of unknown function (DUF2651)	PF10852.8	cc1	Nodularia spumigena UHCC 0039	1485	10	23.89	yes	MAGIIISELHSTNSESFLVEITDTCFLSIYGGNEYALDYAFHQMLNFSYRLMDFMLSAFAIYSIVSLAQSFITTTDFNFAPVQFTPFYLLNSN	WP_006195640_10	2.10E-05
23322	WP_016950446	#2e86c1	Anabaena	none	none	cc1	Anabaena sp. PCC 7108	1369	6	27.46	yes	MARIIIADLHPLDSEVFINELTSTDSQSVFGGQDNYRPQVLEVGAKALEFVLVIAAIDAISFLTSSFINRK	WP_016950446_6	none
23351	WP_010996095	#2e86c1	Nostoc	none	none	cc1	Nostoc sp. PCC 7120 = FACHB-418	1441	4	13.95	yes	MAKIIVSELHSHDSENFLTDLNYEESGLIYGGNQYSYNQIFILAEKIFRFITISFAIATILKIVNSYIGNSHK	WP_010996095_4	none
23426	WP_070396421	#2e86c1	Moorea	Bacteriocin class II with double-glycine leader peptide	PF10439.9	cc1	Moorea producens PAL-8-15-08-1	1714	4	10.98	yes	MSNFSISDLPPAGSALFSESEGFHEFMKEVTEDELKGIEGGGKKNKGGFFFGSKSSKGFKSSRFKPSRSKSSRFKPSKFKPSKGGFFFPHPYGFFPHNCRPVH	WP_070396421_4	5.00E-06
23438	WP_089505437	#FF0000	Streptomyces	none	none	cc1	Streptomyces sp. NBS 14/10	1473	1	50.15	no	MSAIDLMGGYAAYTTPDAAVAELATTRTVHDPDASAITTIIITTTLSLLTTITKGD	WP_089505437_1	none
23580	WP_017617392	#FF0000	Nocardiopsis	none	none	cc1	Nocardiopsis gilva YIM 90087	1215	1	11.71	yes	MSSQDLIGGFEAYTTSDEVSGALKEDLAPEAATWTTTTSSVPCTESVAATVVFKC	WP_017617392_1	none
24919	WP_103138325	#2e86c1	Nostoc	Two-component Enterococcus faecalis cytolysin (EFC)	PF16934.5	cc1	Nostoc sp. CENA543	3010	5	29.62	no	MAKITISDLNPSDYSLTELSAEEMAAIQGGGFLGKLIGGIVGGVAGFFIAGPAGVFSGISAGSTLGDAVEEVFF	WP_103138325_5	1.40E-07
24978	WP_161481447	#FF0000	Herbidospora	none	none	cc1	Herbidospora sp. NEAU-GS84	1309	7	26.51	no	MPGELIAGYANYASTESVLSENTTAEWWPITSYTVTLSTTTTSIWI	WP_161481447_7	none
25077	WP_088242795	#2e86c1	Calothrix	Polo-like Kinase 4 Polo Box 2	PF18409.1	cc1	Calothrix rhizosoleniae SC01	1535	3	17.27	yes	MAKIIISDLSQTIIYTEISKSKLMENINDQELRFIYGGKNSDFDQLLNYFLAGLAIYSIKSIVDSLD	WP_088242795_3	1.90E-06
26356	WP_086820173	#FF0000	Allokutzneria	Protein of unknown function (DUF3005)	PF11448.8	cc1	Allokutzneria sp. NRRL B-24872	56	1	48.83	yes	MLLQDDRMAAELAAGFDTYTTPAELTMAVGDGYEVVAKSVTTATPAITTTTLIFSCHQGCD	WP_086820173_1	4.10E-06
26425	WP_168643398	#2e86c1	Dolichospermum	none	none	cc1	Dolichospermum sp. UHCC 0259	3245	9	15.78	yes	MAVIKVENLSVVGSELFSDYENYLDELLETESINIKGGWTSVLVISTWALR	WP_168643398_9	none
27127	AFY52807	#2e86c1	Rivularia	Protein of unknown function (DUF1533)	PF07550.11	cc1	Rivularia sp. PCC 7116	464	2	38.46	yes	MSKFQINDIKLDGSELFNDSETFLSELKDDETDQIVGGFSLSLSEESSSEASINIKLEVSGDADVTTTVYIPHKPICYPIKPIKPICWYPKPICDQKPFYPIKDFYYPCPVIL	AFY52807_2	1.80E-06
27164	WP_038089561	#2e86c1	Tolypothrix	none	none	cc1	Tolypothrix bouteillei VB521301	2858	5	24.53	yes	MASITISHLHPIDNERLFDELTAREMRTVVGGALVFKLNNVSPKQLEILKLFSVFNNPDRDPITITLNTLDHPGNSY	WP_038089561_5	none
27181	WP_144873874	#2e86c1	Hyella	none	none	cc1	Hyella patelloides LEGE 07179	1358	1	28.82	yes	MADIKISDINFDGNDLFTDSENFMNDLSNDDMGLIQGGDWSTFSGACRFVDADEWSTVSDYCRTVAAIDPGFKKLSS	WP_144873874_1	none
27414	WP_106237513	#2e86c1	Pleurocapsa	Period protein 2/3C-terminal region	PF12114.8	cc1	Pleurocapsa sp. CCALA 161	1327	1	18.21	yes	MGIKINELSPVGANLFADSESFMGNIRSLSEDELKVSGGGGYGHGHSGSGSGKSKSKSKSKSKGSGSGHYGCGCGYGC	WP_106237513_1	9.90E-05
27421	WP_015194417	#2e86c1	Stanieria	AP-3 complex subunit delta-1	PF06375.11	cc1	Stanieria cyanosphaera PCC 7437	1603	3	24.03	yes	MANIQISELSPLGTALFADNESLMGSIRDLTEDELKITGGSGKGSGSKKSGSKKSKSKKSKSKKSKKSGSCGCGYGC	WP_015194417_3	5.00E-05
28409	WP_096559440	#0000FF	Nostoc	Protein of unknown function (DUF4064)	PF13273.6	cc2	Nostoc sp. NIES-4103	2779	1	41.22	yes	MNLSIIAVLAYGILAIVGGIIGYIQANSKVSLFSGSISGLLLLLAAYFQFQGQSWALILAALVTGVLVVFFALRLAKTRKFMPAGLMTILGVLALVVMVNQLVAFK	WP_096559440_1	0.00019
28410	WP_015216396	#0000FF	Anabaena	Transmembrane proteins 14C	PF03647.13	cc2	Anabaena cylindrica PCC 7122	1749	1	42.71	yes	MNLSILATFGYGVLALVGGIIGYIQVKSKISLLSGSISGLLLIFAGYYQLQGQTWGLTLATLVTAILVVLFAFRFAKTRKFMPAGLMIIFGMLALAVMVRQIFG	WP_015216396_1	7.70E-26
28412	WP_026732589	#0000FF	Fischerella	Predicted membrane protein (DUF2070)	PF09843.9	cc2	Fischerella sp. PCC 9605	2414	1	41.13	yes	MNLGIIATLAYGIITLIGGIIGYVTAGSNVSLFSGSISGLLLIFAAFVQIQGETWGLILAAVVTAVLLVVFAFRLAKTRKFMPAGMMTVLGMLTLAVIVNQLTTSRS	WP_026732589_1	0.0016
28414	WP_096561092	#0000FF	Scytonema	Predicted membrane protein (DUF2070)	PF09843.9	cc2	Scytonema sp. NIES-4073	2568	1	40.06	yes	MTLGIVAALAYGILAIIGGIIGYRKANSKVSLISGIISGLLLMIAAFVHLQGQTWGLTLAVVITAVLIVVFGFRLVKTRKFMPAGFMTVLGVVALATMVTQQAVLR	WP_096561092_1	0.00073
28416	WP_073619367	#0000FF	Calothrix	Protein of unknown function (DUF4064)	PF13273.6	cc2	Calothrix sp. HK-06	1830	1	35.91	yes	MNLATIITFTYGILSIVGGIIGYKQAGSKISLISGAISGLLLIIAGILQLQGQSYGFVFAGVITAILVIVFAFRLQKTRKFMPAGLMTVLGVVTLLVIASQLFKASI	WP_073619367_1	0.003
28418	WP_062294404	#0000FF	Nostoc	Predicted membrane protein (DUF2070)	PF09843.9	cc2	Nostoc piscinale CENA21	2681	2	40.31	yes	MNLGIIAAFAYGIFAIVGGIIGYVQARSLVSLLSGGVSGLLLIFFAYWHLQGQPWGLTLAACVAGVLVVVFALRFAKTRKFMPAGLMIVLGALALVLMVHQLVVRKPDIC	WP_062294404_2	0.0012
28420	WP_095720237	#0000FF	Calothrix	Protein of unknown function (DUF4064)	PF13273.6	cc2	Calothrix elsteri CCALA 953	2327	1	32.06	yes	MNFAIVATFAYGILSIIGGIIGYIQVKSKVSLISGTISGLILVISAFLQLQRQGFALALAAVITGILVIVFAIRLQKTRKFMPAGLMTGLGITTLIIILSQLFVK	WP_095720237_1	0.00023
28422	WP_096583741	#0000FF	Anabaenopsis	Protein of unknown function (DUF4064)	PF13273.6	cc2	Anabaenopsis circularis NIES-21	2461	1	42.48	yes	MNLSIIAAFAYGILAIVGGIMGYVQARSKVSLLSGGISGLLLILSAYWQLQGQPWGLTLAVCVTGVLVVVFALRFAKTRKFMPAGLMIVLGALTLAVMAHQLLGL	WP_096583741_1	0.018
28424	WP_045869173	#0000FF	Fremyella	Protein of unknown function (DUF4064)	PF13273.6	cc2	Fremyella diplosiphon NIES-3275	2594	2	39.79	yes	MELGIVAAFVYGILALIGGIIGYVQASSKISLLSGSVSGLLLILAAFLQLQGQIWGLFVAAFITAALVVFFSLRLAKTRKFMPSGLMIILGVLALILMVNQMVGVK	WP_045869173_2	0.00058
28426	WP_127056592	#0000FF	Trichormus	Protein of unknown function (DUF4064)	PF13273.6	cc2	Trichormus variabilis SAG 1403-4b	2415	1	41.22	yes	MNLGIVAAFGYGILSLVGGIIGYIQAKSKVSLLSGGISGLLLIFSAYCQLQGQTWGLTLASVITGILVVFFALRLAKTRKFMPAGLMIIFGMLTLAVMVNQIFVSKGLPEIKLSNFD	WP_127056592_1	0.00048
28428	BAZ80283	#0000FF	Sphaerospermopsis	Domain of unknown function (DUF4131)	PF13567.6	cc2	Sphaerospermopsis kisseleviana NIES-73	1845	1	37.11	yes	MNLGIVAAFGYGILALLGGIIGYIQAKSKVSLISGIISGLFIIFAAYCQLQGQSWGLSVAAFVIGVLVFFFSIRLAKTRKFMPGGLMIIFGIVTLVVILNQI	BAZ80283_1	0.0023
28430	WP_168491601	#0000FF	Anabaena	none	none	cc2	Anabaena sp. UHCC 0253	1909	1	-4.54	yes	MNLSIMVTFDYGIFILVGRILVKFR	WP_168491601_1	none
28432	WP_017320198	#0000FF	Cyanobacteria	Transmembrane proteins 14C	PF03647.13	cc2	Cyanobacteria cyanobacterium PCC 7702	2212	1	31.74	yes	MTVDILAALAYGTIAIIGGIVGYIRANSKISLVSGSFCGLLLIFAAVMQLQGQTWGLLLAAAVTAGLLVFFAFRLAKTRKFLPAGLMTVLGMLALAVMVHALAAKK	WP_017320198_1	8.70E-24
28434	WP_016950293	#0000FF	Anabaena	Protein of unknown function (DUF4064)	PF13273.6	cc2	Anabaena sp. PCC 7108	2194	1	38.42	yes	MNLGIVAAFGYGILSLLGGIIGYIQAKSKVSLLSGSMSGLLLIFSAYCQLQGQTWGLTVAAFITGILIFFFALRLAKTRKFMPAGLMIILGMLTLAVIINQIFVSK	WP_016950293_1	9.10E-05
28436	WP_029637656	#0000FF	Tolypothrix	Protein of unknown function (DUF4064)	PF13273.6	cc2	Tolypothrix [Scytonema hofmanni] UTEX 2349	2250	3	32.17	yes	MNLGIIASIGYGILAIVGGIIGYVASGSNVSLLSGCISGVLLLFAAYLQFQSIIWGLIVAALVTAILVVVFALRLAKTRKFMPAGLMLFFGVLTLAVMVNQLMALRIK	WP_029637656_3	0.00011
28438	WP_026093360	#0000FF	Calothrix	O-Antigen ligase	PF04932.15	cc2	Calothrix sp. PCC 7103	1897	1	40.15	yes	MNLATIITFTYGILSIVGGIIGYKQAGSKISLISGAISGLLLIIAGILQLQGQSYGFVFAGVITAILVIVFALRLQKTRKFMPAGLMTVLGVVTLLVIASQIFKAST	WP_026093360_1	0.0096
28440	WP_013190653	#0000FF	Trichormus	Predicted membrane protein (DUF2127)	PF09900.9	cc2	Trichormus Nostoc azollae 0708	2054	1	34.62	yes	MNLGIVVAFGYGILALVGGIIGYIQAKSKVSLLSGSISGFLIIFAAYSQLQGQTWGLTLAAFVTGILVVFFAFRLARTRKFMPAGLMIIFGILTLAIIVNQIFAS	WP_013190653_1	0.0016
28442	RCJ34841	#0000FF	Nostoc	Protein of unknown function (DUF4064)	PF13273.6	cc2	Nostoc punctiforme NIES-2108	2213	1	42.36	yes	MNLGIVAAFAYGILAIVGGVIGYIQATSKVSLLSGSISGLLLILAAYFQLQGQTWGSILAVLVTAVLVVVFAFRLAKTRKFMPAGLMTILGMLALAVMVNQMVALR	RCJ34841_1	0.017
28444	WP_015116255	#0000FF	Rivularia	Protein of unknown function (DUF4064)	PF13273.6	cc2	Rivularia sp. PCC 7116	2633	2	25.53	yes	MQSIIAASLYGILSIIGGIIGYKTAGSKVSLISGTISGLLLLIAAYLQLQGQVWGSTLAVIITSILVIVFAVRLTKTRKFMPAGLMVILGLVALFSMLSQLLFSV	WP_015116255_2	0.0069
28446	WP_089092704	#0000FF	Nodularia	Domain of unknown function (DUF373)	PF04123.13	cc2	Nodularia sp. NIES-3585	1995	1	50.03	yes	MNLSIIAALTYGILAIIGGIIGYIKANSQVSLFSGTISGLLLILAAYFQIQGQAWALILAVLVTVSLVIFFALRLAKTRKFMPAGMMVILGVLALTFMVNQLMIGR	WP_089092704_1	0.00021
28448	WP_017315790	#0000FF	Mastigocladopsis	Protein of unknown function (DUF3792)	PF12670.7	cc2	Mastigocladopsis repens PCC 10914	2321	1	48.17	yes	MTLGVVAALAYGILAIVGGIIGYRKANSKVSLVSGSLSGLLLIIAAFVQLQGQTWGLILAAVVTAILVVFFALRVTKTRKFMPAGLMAILGVVALATMVNQLAVLR	WP_017315790_1	0.0054
28450	WP_010996620	#0000FF	Nostoc	Protein of unknown function (DUF4231)	PF14015.6	cc2	Nostoc sp. PCC 7120 = FACHB-418	2523	1	47.68	yes	MNLSVTAAIAYGMLALIGGIIGYFQANSQVSLLSGVFSGLLLFVAAYLQLQGQTWGLILATVVTAALVVFFALRLVRTRKFMPAGLMTILGMLSLVVLVNQMVAPK	WP_010996620_1	0.049
28452	WP_169219905	#0000FF	Brasilonema	Transmembrane proteins 14C	PF03647.13	cc2	Brasilonema sp. UFV-L1	4916	1	42.89	yes	MTLGIVAPLAYGILALIGGIIGYRQANSKVSLISGGISGLLLIIAAVVQLQGQTWGLTLAAVVTAVLVITFGVRLVKTRKFMPAGLMAILGLVALGTMVNQLVVLR	WP_169219905_1	7.10E-27
28454	WP_162399305	#0000FF	Nostoc	Protein of unknown function (DUF4064)	PF13273.6	cc2	Nostoc sp. B(2019)	3209	2	42.36	yes	MNLGMIATLAYGILAIAGGIIGYIQANSQVSLISGSISGLLLLFAAYFQLQGQTWALILAVLVTSVLVVVFAFRLIKTRKFMPAGLMTILGMLTLAVMVNQIVVLR	WP_162399305_2	0.0016
28456	WP_039742608	#0000FF	Hassallia	Protein of unknown function (DUF4064)	PF13273.6	cc2	Hassallia byssoidea VB512170	2379	1	30.71	yes	MNLGIIASLGYGFLAIVGGIIGYILSTSNVSLLSGCISGVLLLFAAYLQFQGIIWGLILAALVTAVLVVVFALRLAKTRKFMPAGLMLFFGVLTLAVMVNQLMASIISQ	WP_039742608_1	0.00015
28458	WP_006196066	#0000FF	Nodularia	Predicted membrane protein (DUF2127)	PF09900.9	cc2	Nodularia spumigena CCY9414	2016	1	45.47	yes	MNLSIIAALAYGILAVIGGIIGYIQANSQVSLFSGMISGLLLILAAYLQIQGLAWASILAVLVTLILVIFFALRLAKTRKFMPAGLMVILGMLALTLMVNQLVIGR	WP_006196066_1	0.039
28460	TWH40986	#0000FF	Calothrix	O-Antigen ligase	PF04932.15	cc2	Calothrix desertica PCC 7102	1805	1	40.76	yes	MNLATIITFTYGILSIVGGIIGYKQAGSKISLISGAISGLLLIIAGIIQLQGQSYGFVFAGIITDILVIVFALRLQKTRKFMPAGLMTVLGVVTLLVIASQLFKAST	TWH40986_1	0.007
28462	TVP62142	#0000FF	Nodularia	Protein of unknown function (DUF4064)	PF13273.6	cc2	Nodularia sp. (in: Bacteria)	1997	1	48.38	yes	MNSSIIAALTYGILAMIGGIIGYIKANSQVSLFSGIISGLLLILAAYFQIQGQAWALILAVLVTGTLVIFFALRLAKTRKFMPAGLMVILGVLALTLMVHQLAIAR	TVP62142_1	0.00055
28464	BAZ15600	#0000FF	Calothrix	MerC mercury resistance protein	PF03203.14	cc2	Calothrix sp. NIES-4071	1849	2	23.3	yes	MNFATVTTFTYGILSIVGGIIGYKQAGSKISLISGAISGILLILAGILQLQGQSYAFVLAGVITLILVIFFAFRLQKTRKFMPAGLMTVLGVITLIVIASQFF	BAZ15600_2	0.00096
28466	WP_096680266	#0000FF	Nostoc	Protein of unknown function (DUF4064)	PF13273.6	cc2	Nostoc sp. NIES-2111	2276	1	52.52	yes	MNLSIIAAIAYGALTVIGGIIGYKQANSQVSLLSGIISGLLLFTAAYLQLQGNGWGLILATAVTGALVIVFAIRLAKTRKFMPAGLMTILGMLSLAVLVNQIVVSQ	WP_096680266_1	0.00014
28468	WP_103138934	#0000FF	Nostoc	Protein of unknown function (DUF4064)	PF13273.6	cc2	Nostoc sp. CENA543	2369	1	42.07	yes	MNSSIIAAIAYGVLAIIGGIIGYFQAHSQVSLFSGLVSGFILLLAAYLQLQGQAWALILATCVTAVLVVFFALRLAKTRKFMPAGLMTILGMLALTVMVNQLVTVR	WP_103138934_1	0.038
28470	RCJ31639	#0000FF	Nostoc	Protein of unknown function (DUF4064)	PF13273.6	cc2	Nostoc minutum NIES-26	2528	2	37.3	yes	MNLSIIAVFSYGILAIVGGIIGYIQANSQVSLLSGSISGLLLIFAAYFQLQGQGWALILAAFITAVLVVVFAFRLAKTRKFMPAGLMTILGMLALTVMVNQLVTGK	RCJ31639_2	0.00072
28472	WP_071187741	#0000FF	Trichormus	Transmembrane proteins 14C	PF03647.13	cc2	Trichormus sp. NMC-1	2262	1	24.47	yes	MNLGIVAAFGYGILSLVGGIIGYIQAKSKVSLLSGSISGLLLIFSAYCQLQGQTWGLTEEDAESGRRGDAESRLCPTFDANGFKPPTTSRGEEKRHSLLESLGFRHGV	WP_071187741_1	7.00E-17
28550	WP_027840959	#0000FF	Mastigocoleus	Predicted membrane protein (DUF2070)	PF09843.9	cc2	Mastigocoleus testarum BC008	2808	1	31.37	yes	MTISVVSTILYGILGIIGGIVGYQKAGSKISLISGVVSGILLIVSGLVALQGQKWGLILGIAVAGILVIVFAVRFVKTRKFMPAGLMSILGLVVIFSILKNF	WP_027840959_1	0.00012
28637	TAE58797	#0000FF	Nostocales	Transmembrane proteins 14C	PF03647.13	cc2	Nostocales cyanobacterium	1753	1	42.13	yes	MNLGIFAAFGYGILVLIGGIIGYIQVKSQVSLISGIISGLLIIIAAYCQLQGITWGLALAGVVTGFIVTFFAIRLAKTRKFMPAGLMVIFGVLALVIILNQIVSSQ	TAE58797_1	3.40E-24
28671	BAZ41701	#0000FF	Calothrix	Protein of unknown function (DUF4064)	PF13273.6	cc2	Calothrix sp. NIES-4101	2436	1	36.8	yes	MFSIVATFAYGILAMIGGIIGYVQSQSKISLISGTISGSLLVIAGFLQVQGLEFAFVFASVITAVLVVIFAIRLKKTRKLMPAGLMTGLGMVTLVLILSRLLVR	BAZ41701_1	0.013
28766	BAZ29305	#0000FF	Cylindrospermum	Protein of unknown function (DUF4064)	PF13273.6	cc2	Cylindrospermum sp. NIES-4074	2219	1	40.66	yes	MNLGIVATLGYGVLAIVGGIIGYIQAGSKVSLLSGSISGLLLIFAAYLTLQGQTWALILAALVTGVLVVVFSFRLAKTRKFMPAGLMIILGTLALVVMVNQILTATRV	BAZ29305_1	0.0015
28943	WP_096659345	#0000FF	Calothrix	Protein of unknown function (DUF4064)	PF13273.6	cc2	Calothrix parasitica NIES-267	2618	1	43.86	yes	MQSIIAASLYGILSVIGGIIGYKSAGSKVSLISGTISGLLLLTAAFVQLQGQAWGLTLAVIITSILMVVFAIRLAKTRKLMPAGLMVILGLVTLVVMLLPNGVTG	WP_096659345_1	0.00052
28979	WP_016874828	#0000FF	Chlorogloeopsis	Protein of unknown function (DUF4064)	PF13273.6	cc2	Chlorogloeopsis fritschii PCC 6912	2456	1	31.46	yes	MALDIIAALVYGIITIIGGIIGYINASSNISLVSASICGLLLIFAAFARLQGQTWGLTLAAIVTAVLLVVFAFRLAKTRKFMPAGLMTILGMLTLAVMIHQFMALRR	WP_016874828_1	0.00017
29015	WP_066380047	#0000FF	Anabaena	Protein of unknown function (DUF4064)	PF13273.6	cc2	Anabaena sp. 4-3	2637	1	43.81	yes	MNLSIIAAIAYGILAIIGGIIGYLQANSQVSLLSGTVSGLLLIVAAYFQLQGQTWALIVATFVTAVLVVFFAMRLAKTRKFMPAGLMTILGMLALTVMVNQLVNFG	WP_066380047_1	4.60E-05
29139	WP_073631441	#0000FF	Scytonema	Protein of unknown function (DUF4231)	PF14015.6	cc2	Scytonema sp. HK-05	2720	1	41.38	yes	MTLGIVAALAYGILAIIGGIIGYRKANSKVSLISGIISGLLLMIAAFVHLQGQTWGLTLAAVITGVLIVVFGFRLVKTRKFMPAGFMTILGVLALATMVTQLAVLR	WP_073631441_1	0.021
29228	WP_087592205	#FFA500	Cyanobacteria	Protein of unknown function (DUF1192)	PF06698.11	cc3	Cyanobacteria unicellular cyanobacterium SU3	2313	5	28.51	yes	MKEKLTENLTQIQLDDLISESVENARSRRQKTMELEDDLRELSVQEVRHIKGGLSRDIITMGYFAR	WP_087592205_5	3.20E-06
29229	WP_124970176	#FFA500	Aphanothece	Tryptophan/tyrosine permease family	PF03222.13	cc3	Aphanothece sacrum FPU1	6951	8	26.27	no	MNENLRNHLGQVEIADLIEASVANAALRRQQVLEDSLIDISDEESKNIEGGLAFLPPIVLGIFYPDPFPIGIILKDPIIPKF	WP_124970176_8	1.20E-06
29231	WP_096679519	#FFA500	Nostoc	none	none	cc3	Nostoc sp. NIES-2111	5428	3	34.17	yes	MQTNSNISHQIEINDLIDNAVNNALVRRNPDLDTDSNLLDVSNEDAEKVLGGQIRPIISGFISPIPPITVGLIVINDDVLKA	WP_096679519_3	none
29232	RCJ40334	#FFA500	Nostoc	CorA-like Mg2+ transporter protein	PF01544.18	cc3	Nostoc punctiforme NIES-2108	2195	1	42.77	yes	MERNKKNSDIKFDISNLIDNAVNNAVARRNLAEDLEDTLLTLSDEEMANVAGGLATASLLKGPTIAGGIFVREPITCGIIAQNPNLSAQAF	RCJ40334_1	4.90E-06
29234	WP_167721203	#FFA500	Tolypothrix	RiPP_CPAC: RiPP peptide	NF033629.0	cc3	Tolypothrix sp. PCC 7910	4737	4	45.43	yes	MEKRKSNYDGHLEINSLIDDAVNNAIARRNQGLDAEDALLEDVSTEEAKNVAGGLATTTIGLIIKPPITIGIIAIPNPTI	WP_167721203_4	5.50E-06
29236	AVH79662	#FFA500	Desmonostoc	none	none	cc3	Desmonostoc muscorum PCC 7121	5375	4	30.83	yes	MEANNKKCNNQIEIHDLIDEAVNNALARRNHVIDANEGLSNLSSEEAGNIVGGASTPAIAGFKPICPPIIIGLIATDPDVLKA	AVH79662_4	none
29238	WP_012409787	#FFA500	Nostoc	none	none	cc3	Nostoc punctiforme PCC 73102	3979	2	43.12	yes	MEAKERKYHSQIEVNDLIDDAVKNAVTRRNEVLDSEEALLSMSDEEAKSVSGGESKLVPIILGKIFIPPITIGLVAVDNSI	WP_012409787_2	none
29240	WP_104899482	#FFA500	Nostoc	Rab15 effector	PF15208.6	cc3	Nostoc sp. Peltigera membranacea cyanobiont N6	2589	3	33.47	yes	MSSEMNQRYTKSQIEITDLIAEAVVHASARRKQVLDAQESLSELSDEEEKGINGGSLIRIIIGLIFVD	WP_104899482_3	1.30E-06
29241	TVP63782	#FFA500	Nodularia	none	none	cc3	Nodularia sp. (in: Bacteria)	4690	3	34.76	no	MAKNQSERHSQFEINDLIDDAVNNAVERRNQALDAEPALSGLSEEEAANISGGLVTKFAIAGYFPICPPITLGIIYIPPTITIK	TVP63782_3	none
29243	WP_012595952	#FFA500	Rippkaea	none	none	cc3	Rippkaea orientalis PCC 8801	4046	3	42.18	yes	MNKHFGQIEIADLIEESVANAAIRRQQMAENSLVDVTEEEAKNIEGGSLNIRIPFIPPIILGLIFPPTIEF	WP_012595952_3	none
29245	WP_096589596	#FFA500	Calothrix	none	none	cc3	Calothrix sp. NIES-2098	4544	5	44.83	yes	MEKHQRNYKGHLEINSLIDDAVNNAIARRNQGLDSEDALLDVSDEEAKNVAGGLASTTIGLIAKPPIIVGIIAIPTPTI	WP_096589596_5	none
29247	WP_015216084	#FFA500	Anabaena	none	none	cc3	Anabaena cylindrica PCC 7122	6043	3	37.51	no	MEINNKHHNNQFEINDLIDEAVNNAVARRQETLLDLSDEEAKNVAGGASLSIKPIILGRIFCPPITIGIIAVDPKIQTI	WP_015216084_3	none
29249	WP_168643398	#FFA500	Dolichospermum	Bacteriophage replication gene A protein (GPA)	PF05840.13	cc3	Dolichospermum sp. UHCC 0259	4856	3	35.49	yes	MEINKKNQFEINDLIDESVSNAVARRSEALDSVENLSDEEAKNVTGGALIKPIILGRIFWPPITTGIIVVNPVKF	WP_168643398_3	1.90E-05
29251	WP_104899482	#FFA500	Nostoc	none	none	cc3	Nostoc sp. Peltigera membranacea cyanobiont N6	3458	1	49.48	yes	MEAKERKYNSQIEINDLIYGAVQNAVTRRNEVLDSEEALSSMSDEEAKSVAGGALKVDTIILGKIFIPPITIGLVAVDYI	WP_104899482_1	none
29253	WP_106371152	#FFA500	Chlorogloea	Poxvirus P4A protein	PF03395.14	cc3	Chlorogloea sp. CCALA 695	1656	2	34.98	yes	MSANINQRKCNSQIEITDLIAEAVQNASARRNQVLDAKEPLLAFSEEEANGIMGGQVGKADYTTCGIISCDPPFLS	WP_106371152_2	1.50E-05
29258	WP_073591536	#FFA500	Phormidium	none	none	cc3	Phormidium ambiguum IAM M-71	2221	3	29.42	yes	MNHNQKFEITDLVNEAVSNAAVRRNQVLDSEEGLSSLSDEQAGSVTGGAIFNIKDIIIFGGFPFGLNRQINP	WP_073591536_3	none
29260	WP_073643028	#FFA500	Nostoc	none	none	cc3	Nostoc calcicola FACHB-389	2504	4	28.43	yes	MESKNSNIRLEINNLIDDAVNNAVARRNLGEDSEDALLSLSDEETANVAGGLASISLLRVPIICGLIALPQLPQIDKTSFY	WP_073643028_4	none
29267	WP_086760950	#FFA500	Nostoc	Protein of unknown function (DUF4064)	PF13273.6	cc3	Nostoc sp. RF31YmG	4786	5	45.91	yes	MEKHKKSYNGHLEINSLIDDAVNNAIARRNQGLVSEDALAAVSDEEAKNVAGGLASTTTTIGLIAKPPIIVGIIAIPTETI	WP_086760950_5	3.10E-06
29271	BAZ33272	#FFA500	Cylindrospermum	none	none	cc3	Cylindrospermum sp. NIES-4074	1963	2	31.67	yes	MKANNRLEINDLIDDAVNNALARRNEALASVSDDEAKNIAGGALSNPIILGKIPVPITIGIIVVPTKTYYAQESSSLKLN	BAZ33272_2	none
29281	WP_103138325	#FFA500	Nostoc	none	none	cc3	Nostoc sp. CENA543	2472	7	24.12	no	MQSMRNIFLMNKFTSVDKNMETNNRNFKNQIEINDLIDAAVSDALARRSGNDDNLSDLSGEDADHVTGGIASLTIAGYKPIPPIIKPICPPITVGIIALPGKEIM	WP_103138325_7	none
29297	WP_138498533	#FFA500	Nostoc	none	none	cc3	Nostoc sp. PA-18-2419	1847	1	37.2	yes	MERKNSNMRLEINNLIDDAVNNAVARRNLGEDSEDTLLNLSDEETAKVEGGIASVSLVKIPIICGLIALPRVLPQINQTSVY	WP_138498533_1	none
29306	RCJ40334	#FFA500	Nostoc	Two-component Enterococcus faecalis cytolysin (EFC)	PF16934.5	cc3	Nostoc punctiforme NIES-2108	1367	2	33.19	yes	MNIHHKHFTSQIEITNLIEEAVVNASARRKQVLEQNSLSELSEEEQKNITGSGVATDVRDAIILLGGYLLG	RCJ40334_2	9.60E-06
29311	WP_087592205	#FFA500	Cyanobacteria	none	none	cc3	Cyanobacteria unicellular cyanobacterium SU3	4581	3	52.45	yes	MNEHLGKHLGELEIADLIEESVANAAQRRQQFVEDSLVDITEDEAKNIEGGLSFTPLVYPDPTTLGIIIEPCCTTVGLIAIDPTLSK	WP_087592205_3	none
29319	WP_073643028	#FFA500	Nostoc	plantaricin: plantaricin C family lantibiotic	NF000539.0	cc3	Nostoc calcicola FACHB-389	1676	1	41.57	yes	MSMNIHQKHLTNQIEISNLIEEAVVNASARRNQVLDTQEVLSELSEDEQKNITGGGVARDVIDTIIRIGGYLLG	WP_073643028_1	9.80E-06
29336	WP_073591536	#FFA500	Phormidium	none	none	cc3	Phormidium ambiguum IAM M-71	1265	5	18.76	yes	MNHDRRKYHSQIEITDLVGQGNSILDSEEILSSLSDRQAKKVSGGNIVLLLQIIAGGYAPARIDIY	WP_073591536_5	none
29350	TCN71580	#FFA500	Streptomyces	none	none	cc3	Streptomyces sp. BK387	53	2	-5.9	yes	MHLGGQIRACYKGNVSGRSP	TCN71580_2	none
29351	CNF13542	#FFA500	Mycobacterium	Homeodomain-like domain	PF13565.6	cc3	Mycobacterium tuberculosis	6200	3	46.84	yes	MVCRPPGSNWSCCPLTGIYDPNGLGAMLFAVLAVAATLEGQQAAAARGNHGGRPKVIDDDMLTFALALRAKGLPVPAIAAKLKITTGKNAGKPPSVASLYRALADADSRAEHRERERPRA	CNF13542_3	1.40E-05
29417	WP_106371152	#FFA500	Chlorogloea	Small, acid-soluble spore proteins, alpha/beta type	PF00269.20	cc3	Chlorogloea sp. CCALA 695	2415	6	19.12	yes	MNRNQRNHKGQVEINDLIDVAVNNAVFRRKGIIDSEDALSDEQAGNIAGGSIVEKIIYFGGYLLGQIN	WP_106371152_6	5.20E-06
29433	WP_012409787	#008000	Nostoc	Nif11 domain	PF07862.11	cc4	Nostoc punctiforme PCC 73102	3008	1	64.23	yes	MSLEHVKAFYQKLANDEAFSNQIQGVNSKEECSQIVKAAGYDFTLEEYEEYTAQLLESADGEGELKDLSEKELAAVFGGLTGKPRIQPLYGVVWPPYQLMYGVIRVDDTL	WP_012409787_1	2.90E-19
29434	WP_086760950	#008000	Nostoc	Nif11 domain	PF07862.11	cc4	Nostoc sp. RF31YmG	3585	2	61.65	yes	MSLENVRAFYEKLASDEAFRSKMQTVESKDECSQVVKSAGFDFTQEEFEEYTTQLLESNAAEGDLKDLGEKELEAVFGGILGKPIVQPLYGVIVWPPIKWPPIYPQPLYGVVTTTDI	WP_086760950_2	4.90E-18
29436	WP_167721203	#008000	Tolypothrix	Nif11 domain	PF07862.11	cc4	Tolypothrix sp. PCC 7910	3906	5	44.95	yes	MSLENVRAFYERLASDEAFRVQIQGVESKDVGRELLQNSGFDFTQSEFEEYTEQLLAKSASNDDLKDLNEQELEAVFGGAIPVIFPGGLPILMYGVVITSIRWLF	WP_167721203_5	8.40E-15
29438	WP_087592205	#008000	Cyanobacteria	Nif11 domain	PF07862.11	cc4	Cyanobacteria unicellular cyanobacterium SU3	3756	2	59.38	yes	MSVGNVKAFYQRLAQDEQFRSELSEVKSKEECSQLVQQAGYNFTQEEFENYTSELLESSFNKDELSDLNEKELEAVFGGASSQISSPTIQPMYGIITWPPKDWGPQPLYGVIVDEPLF	WP_087592205_2	2.60E-18
29440	WP_012409787	#008000	Nostoc	Nif11 domain	PF07862.11	cc4	Nostoc punctiforme PCC 73102	2726	8	17.26	yes	MPIKNVKAFYENLANDEAFRHQIESVNSKEQCNQIVKTRDR	WP_012409787_8	1.60E-12
29442	TVP63782	#008000	Nodularia	Nif11 domain	PF07862.11	cc4	Nodularia sp. (in: Bacteria)	3845	1	57.4	no	MSLEHVKFFYETIAKDEHFRAQVQGATSKDECSQIVKSAGYDFTQEEFEEYTLQLLESTANEGELQDLSEKELAAVVGGATTALVGSILPYMVLLYGLPPINLLPRNTL	TVP63782_1	1.80E-16
29444	WP_086760950	#008000	Nostoc	Nif11 domain	PF07862.11	cc4	Nostoc sp. RF31YmG	3979	1	62.84	yes	MSLENVRAFYERLASDEAFRNQIQSVESKDAGREILQNAGFDFTPAEFEEYTEQLLETNAANDDLKDLNPQELEAVFGGAIPVIFPGVLPILMYGVVITQIRGLL	WP_086760950_1	8.10E-18
29446	WP_012595952	#008000	Rippkaea	Nif11 domain	PF07862.11	cc4	Rippkaea orientalis PCC 8801	2920	1	57.5	yes	MSLVDVKSFYQRLAKDEAFRTQLQEVTSKEECSQLVQASGYNFTQEEFESYTSELLESSLNEGDLQDLNEKELEAVFGGASSRIGRGKIQPLYGVIWPPEYVQPLYGVVISE	WP_012595952_1	4.70E-18
29448	WP_096589596	#008000	Calothrix	Nif11 domain	PF07862.11	cc4	Calothrix sp. NIES-2098	3344	1	61.73	yes	MSLENVRAFYEKLASDEAFRSQMQAVESKDECSQVVKSAGFDFTQEEFEEYTTQLLESNGAEGELKDLGEKELEAVFGGILGQPIIQPLYGVIVWPPIKWPPIYPQPLYGVVTTTDI	WP_096589596_1	1.30E-18
29450	WP_015216084	#008000	Anabaena	Nif11 domain	PF07862.11	cc4	Anabaena cylindrica PCC 7122	4742	1	57.05	no	MSLENVKAFYKQLASDEDFRTQIEGVENKEECSQIVKAAGYDFTQAEYEEYTYQLLESANSEGEVQDLGEKELAAVFGGIIGRPKIQPLYGVVWPPFQLLYGVIRPDDTLA	WP_015216084_1	3.80E-19
29452	WP_015216084	#008000	Anabaena	Nif11 domain	PF07862.11	cc4	Anabaena cylindrica PCC 7122	5135	2	53.68	no	MSLENVRDFYERLATDDDFRNQIQGVESRELGRQILQDSGYNFSPEEFEEYTEQLLESSNSDDSLRVLSEQEAEAVIGGFFPIFPILLYGVVISQIKYIL	WP_015216084_2	3.10E-15
29454	AVH79607	#008000	Nostoc	Nif11 domain	PF07862.11	cc4	Nostoc sp. PCC 9205	5625	1	50.28	no	MSFENVRAFYERLANDEAFRTQIQGVESKEAGLEILQNSGYIFTPDEFEEYTANLLETNAAESELRDLDEQELEAVFGGITSILRFPFPVLLYGVVISRLPWILR	AVH79607_1	7.50E-17
29456	WP_096679519	#008000	Nostoc	Nif11 domain	PF07862.11	cc4	Nostoc sp. NIES-2111	4371	1	62.34	yes	MSFENVRAFYERLANDEAFRTQMQQVKSKDECSQTVKAAGYDFTQEEFEEYTSQLLESDANDGELKDLSEQELEAVFGGTTTYFRKPIVQPLYGIVWEPPIYQPLYGVVITTEGF	WP_096679519_1	2.00E-17
29458	AVH79456	#008000	Roholtiella	Nif11 domain	PF07862.11	cc4	Roholtiella [Tolypothrix] sp. PCC 7415	4137	1	57.8	no	MSLENVRAFYEKLVNDEAFRTQMQAVESKDECSQVVKSAGFDFTQEEFEEYTTQLLESNAAEGELKDLGEKELEAVFGGILGKPIIQPLYGVTWWPPIKWPPIYPQPLYGIVTTNDI	AVH79456_1	1.90E-18
29460	AVH79628	#008000	Nostoc	Nif11 domain	PF07862.11	cc4	Nostoc sp. PCC 9201	4384	1	60.28	yes	MSFENVRAFYEKLVKDEVFRTQMQQVESKDECSRIVKEAGYDFTQEEFEEYTAQLLESNANEGEIRDLNDQELETVFGGASSLVGSKPVYQPMYGVIFWPPEKWPPVQPLYGVVLDT	AVH79628_1	8.20E-18
29462	WP_012597836	#008000	Gloeothece	Nif11 domain	PF07862.11	cc4	Gloeothece citriformis PCC 7424	2889	1	52.24	yes	MSLQNVEAFYQRMTTDPEFSNQVQQAKTSEERIKVIRNEGYYFTQEEFDEYTDKFLMSKFEEGELVDLSERELDAVLGGLKGSFPKAIALYGIPPYLY	WP_012597836_1	2.10E-19
29464	WP_096589596	#008000	Calothrix	Nif11 domain	PF07862.11	cc4	Calothrix sp. NIES-2098	3737	2	60.53	yes	MSLENVRAFYERLASDEAFRNQIQSVESKDAGREILQNAGFDFTPAEFEEYTEQLLETNAANDDLKDLNPQELEAVFGGAIPVIFPGVLPILMYGVVITQIRSLL	WP_096589596_2	1.10E-17
29466	WP_168643398	#008000	Dolichospermum	Nif11 domain	PF07862.11	cc4	Dolichospermum sp. UHCC 0259	3925	1	63.62	yes	MSLENVRAFYEKLACDEGFRSQIQEVDNKEVGREILEASGYNFTQEEFEEYTEQLLESGNSPEGLRDLNEKELEAVFGGATSVLLPIGFPILLYGVVISKIGRIL	WP_168643398_1	4.40E-14
29468	WP_124970176	#008000	Aphanothece	Nif11 domain	PF07862.11	cc4	Aphanothece sacrum FPU1	5545	1	66.86	no	MSLAQVKSFYEQLAKDEAFRSQIQNVESKEQCSQIVKAAGYDFTLEEYEEYTYQLLESAAGEGEIQDLGEKELAAVFGGLTGRPEIQPLYGVIVWPPKECPPQPLYGVIISPK	WP_124970176_1	4.90E-18
29470	WP_087592205	#008000	Cyanobacteria	Nif11 domain	PF07862.11	cc4	Cyanobacteria unicellular cyanobacterium SU3	2937	4	44.51	yes	MSVKNVKAFYQRLSDDEAFRAGLQTVRNKEECSQFVKKAGYDFTQEEFESYTAELLESSENETKFQDALEELEQQELAAVFGGLTRNDVTIYGLPFKLF	WP_087592205_4	1.20E-18
29472	AVH79662	#008000	Desmonostoc	Nif11 domain	PF07862.11	cc4	Desmonostoc muscorum PCC 7121	4530	1	54.99	yes	MSFENVRAFYEKLVSDEAFRSQMQQVESKDECSRLVKEAGYDFTPEEFEEYTAQLLESNPDDGEIRDLNDQELETVFGGVSSLIGSKPIYQPMYGVIFWPPEKWPPVQPLYGVVLSQD	AVH79662_1	1.50E-18
29493	WP_012595952	#008000	Rippkaea	Nif11 domain	PF07862.11	cc4	Rippkaea orientalis PCC 8801	3274	2	55.88	yes	MSFENVRAFYERLAQDVEFRSELQEVKTKEECSQFVQQAGYNFTEEEFETYTSRLLEASQKEGELQDLDERELEAVFGGVSHAFFPLIPILLYGVVFLKDQM	WP_012595952_2	4.70E-18
29515	WP_087592205	#008000	Cyanobacteria	Nif11 domain	PF07862.11	cc4	Cyanobacteria unicellular cyanobacterium SU3	3371	1	62.39	yes	MSLESVKAFYQRLAKDEEFRSRLEGLETSEQSSQLLQQAGYNFTEEEFENYTAELLESNLNEGDLKDLNEQELEAVFGGMTPFPPIEALYGVIAPSFPGPIPFPGPFPFSGNTP	WP_087592205_1	6.50E-18
29548	TVP63782	#008000	Nodularia	Nif11 domain	PF07862.11	cc4	Nodularia sp. (in: Bacteria)	3473	2	51.51	no	MSLENVKGFYEQLANDETFRTQIQGVQSKDECSQVVQSAGYDFTQQEFEEYTIQLLESTANKGELQDLSEKELEAVFGGFLGKPVIRPLYGVITWPPMPWEPQPQPLYGVVNSEF	TVP63782_2	1.40E-17
29603	WP_103138325	#008000	Nostoc	Nif11 domain	PF07862.11	cc4	Nostoc sp. CENA543	1617	1	67.6	no	MAFENVRAFYERLANDEAFRSQMQQVESKDECSQVVKAAGFEFTQTEFEEYTTQLLESAAGEGELRDLDEQELEAVFGGASSLLDKIRIQPLYGVIVWPPKPPYAQPLYGVIVSEEF	WP_103138325_1	1.70E-15
29628	WP_167721203	#008000	Tolypothrix	Nif11 domain	PF07862.11	cc4	Tolypothrix sp. PCC 7910	3488	1	59.58	yes	MSLENVRAFYERLVSDDTFRTQMQGVESKDECSQVVKSAGYDFTQEEFEEYTTKLLESNAPDQDLTDLSEQELEAVFGGILGKPIIQPLYGVVVWPPIKWPPIYPQPLYGVVTTDGV	WP_167721203_1	2.10E-17
29670	AVH79456	#008000	Roholtiella	Nif11 domain	PF07862.11	cc4	Roholtiella [Tolypothrix] sp. PCC 7415	4531	2	56.14	no	MSLENVRAFYERLASDEAFRNQIQSVESKDAGREILQNAGFDFTPAEFEEYTEQLLETNAANDDLKDLNPQELEAVFGGAIPVLFPGILPILMYGVVITQIRGLL	AVH79456_2	8.10E-18
29742	WP_168643398	#008000	Dolichospermum	Nif11 domain	PF07862.11	cc4	Dolichospermum sp. UHCC 0259	3528	2	62.52	yes	MSLGSVRDFYKQLVADDDFRNQIQNVENKEECSQIVKAAGYDFTQEEYEEYTLKLLESVNSDNELQDLGEKELAGVFGGITGWPKIQPLYGVIRPPMQLLYGVIIDNTLI	WP_168643398_2	1.10E-16
29831	WP_096681247	#FF00FF	Nostoc	none	none	cc5	Nostoc sp. NIES-2111	119	10	29.36	yes	MTQKVFSSHQISECLILTEEWEAILKAIASGKYSWACILMLYTVGHNPLTYIPYSTYLRLVKKNNMPNVIKARKNNSTGVKFVAIKTKVMELD	WP_096681247_10	none
29832	WP_015127932	#FF00FF	Calothrix	none	none	cc5	Calothrix sp. PCC 7507	176	5	28.25	yes	MSQENSESNQQSDKIIQIEQVEQIIKAVLAGKYSWACVLFLHFVGYNPLKYIPYRTYIRLLKNNCLLGKMHSNKIEKNNVELVDIKSNWIHLSSSGHGSN	WP_015127932_5	none
29834	WP_010996095	#FF00FF	Nostoc	none	none	cc5	Nostoc sp. PCC 7120 = FACHB-418	150	3	27.65	yes	MTQESFQHHQLCNCTILTEEWEAILQAISVGKYSWACVLMLHTAGYNPLTYIPYRTYIRLLKNNSMPDTIKTRKLQHIGAKFVAIKIKMMELD	WP_010996095_3	none
29836	WP_015212417	#FF00FF	Anabaena	none	none	cc5	Anabaena cylindrica PCC 7122	223	7	27.09	yes	MIQENFEQKQQLDQIFDHSQFQQIIKAIILGKYSWACILFLHFSGYDPQDYIPQETYHKLLQENFIFTEVNHHPTHHRKLKFPHIKLSWIKLNTSKHSSN	WP_015212417_7	none
29838	TVP62740	#FF00FF	Nodularia	Corona nucleocapsid I protein	PF03187.14	cc5	Nodularia sp. (in: Bacteria)	163	5	19.24	yes	MTEENSDMNQPAENIISAESWRQIIKAIIVGKYSWACVLFLHFMGYEPTKYICRLTYLKLLENNFILPISQPNQADK	TVP62740_5	5.80E-06
29840	WP_057178590	#FF00FF	Cylindrospermopsis	Recombination protein U	PF03838.14	cc5	Cylindrospermopsis raciborskii GIHE 2018	144	6	30.55	yes	MIPENFEQKQESEKIDITFQHIQIQQIIHAIIAGKYAWACILFIYFSGRDPLHYIPQEIYTKLVRDNFPPVSTNRELTTDKKLSS	WP_057178590_6	4.40E-06
29842	CEJ45116	#FF00FF	Chrysosporum	none	none	cc5	Chrysosporum ovalisporum	255	4	29.41	yes	MTEEDFDINQPAETIIDIDAPNYRQIITAIFAGNYSWACILFLHLLDCIPTKYIPPQIYLKLLEDNFIPHISKQNQADKFNK	CEJ45116_4	none
29844	WP_073644071	#FF00FF	Nostoc	none	none	cc5	Nostoc calcicola FACHB-389	207	3	31.82	yes	MSQEFFDSNEAFNNKINFNHEELEEIIKAVKDGKYSWACVLMLRYSGYNPLEYIPSRTYIRLMKKNCLFDKTNLYQTDNQNVGFFHLESTWFQQNSDRHSSN	WP_073644071_3	none
29846	WP_069073064	#FF00FF	Nostoc	none	none	cc5	Nostoc sp. KVJ20	74	2	35.11	yes	MNYMTQEFSTSNELLDNKFKFNHEELEHIVKAVSVGKYSWACVLILRFSGYNPLEYIPSRTYIRLMKNNWLLSKANRRQTDNRNLGLFQLESSWIQMGIGKGRSNDSREKGTENREQA	WP_069073064_2	none
29848	TAE59458	#FF00FF	Nostocales	none	none	cc5	Nostocales cyanobacterium	65	4	31.91	yes	MIQEKFNNNQNCDQGLKSPHWQEIIQAIINCKYSWACVLFLRFSGYEPSEYIPYKVYKQLVKENSSVNLDNSNYSHHQSVKSSIFRIY	TAE59458_4	none
29850	WP_071189061	#FF00FF	Trichormus	none	none	cc5	Trichormus sp. NMC-1	112	1	33.86	yes	MIQENFEQNNRLDKIFKPTQFQQIIKAIILGNYSWACVLFLHFSGYDPLEYIPYETYNNLLKENCILGDDNHRTNEKKMKLSNIKLSWIKLSKGKNSSK	WP_071189061_1	none
29854	WP_138499068	#FF00FF	Nostoc	none	none	cc5	Nostoc sp. PA-18-2419	40	3	41.5	yes	MAQQLSESDEILTPKFHFNHEELEHILRAVTLGKYSWACVLILRFISYDPLKYIPSRTYIRLIKSNCLLGKINRQQADTQNFGLLKLESTWIQQGYGKRSSK	WP_138499068_3	none
29856	RCJ14929	#FF00FF	Nostoc	none	none	cc5	Nostoc sp. ATCC 43529	168	5	28.78	yes	MNQDFSEFNEGLNKKFNFTHQELEEIIKAVRDGKYSWACLLMLRFSGYNPLEYIPSRTYIRLMKRNCLFSRTDNQNIGFFQLESTWFQHSSDRHGSN	RCJ14929_5	none
29862	WP_016950446	#FF00FF	Anabaena	none	none	cc5	Anabaena sp. PCC 7108	112	4	34.44	yes	MIQKSFDQNQRLDKIFKYTQFQQIIKAIILGNYSWACVLFLHFSGYDPLEYIPHETYSNLLKENCILGDDNHHGTDESKLKLSNIKLSWIKLKNSKHSSK	WP_016950446_4	none
29866	WP_099071810	#FF00FF	Nostoc	HepA-related protein (HARP)	PF07443.13	cc5	Nostoc linckia z15	156	4	33.99	yes	MNEDFPDFDENLHRTAIFNHQELEEIINAIKNGKYSWACLLMLRFSGFNPLEYIPSRTYIRLMKNNWVFDKSEHQNLGFFQLESTWFQQSNDKHSSN	WP_099071810_4	4.30E-06
29879	WP_096536886	#FF00FF	Nostoc	none	none	cc5	Nostoc linckia NIES-25	293	2	32.2	yes	MSQDFSEFNESSNIKNNFTHQELEEILKAVRDGKYSWACLLMLRFSGFNPLEYIPYRTYIRLMKRNFLFGRTDNQNLGFFQIESTWFQQGSDKHGAN	WP_096536886_2	none
29881	WP_015210601	#FF00FF	Cylindrospermum	none	none	cc5	Cylindrospermum stagnale PCC 7417	48	1	39.04	yes	MTQENFELNEPLDKIFKPEEFEQVVKAIIGGKYSWACFLILHFAGYNPIDFIPYRTYIRLLKKNCQVGGEKFYATEHRKLEPLSAWVRLGGDKHGSN	WP_015210601_1	none
29896	WP_026100063	#FF00FF	Fortiea	none	none	cc5	Fortiea contorta PCC 7126	35	9	23.26	yes	MNPENIESNQPTNKIIQTEQVEQIIKAVLAGKYSWACVLFLHFVGYNPIKYIPYRTYIRLLKNNCLLGKNHNNKNVEFVEIKSEWMQINNTNHGAN	WP_026100063_9	none
29922	WP_096569967	#FF00FF	Sphaerospermopsis	none	none	cc5	Sphaerospermopsis kisseleviana NIES-73	99	7	31.64	yes	MIQENFEQNQQLDKIFKDAQFQQIIKAIILGKYAWACVLFLHFAGCDPLDYIPHEIYSQLIQDNYIFTGDKQHLKQDKKLEFSGLKVNWGKFTSSKHSSN	WP_096569967_7	none
29933	RCJ30949	#FF00FF	Nostoc	none	none	cc5	Nostoc minutum NIES-26	266	12	18.46	yes	MNEEFSNCSQPLNKIISSEEWEPIIKAIVAGKYSWACVLILHVIGLNPIEYIPYRTYMRLLKNNCILDKSSKNKTNGMKLQFFTIKSRWTELSSSKLE	RCJ30949_12	none
29949	WP_011321056	#FF00FF	Trichormus	none	none	cc5	Trichormus variabilis 0441	152	7	25.86	yes	MTQEYFRHHQLCDCTILTEEWEAILQAISVGKYSWACVLMLHTAGYNPLTYIPYRTYIRLIKNNSIPNTIKTRKLHNMGVKFVAIKTEVIELD	WP_011321056_7	none
29971	WP_013190203	#FF00FF	Trichormus	none	none	cc5	Trichormus Nostoc azollae 0708	124	2	30.05	yes	MIKGNYEQNKQFNKILQQSQFREIIKAIILGKYSWACILFLHFSGCDPLDYIPHETYSKLIRENYIFAEDNHDSIHENKLRLPGIKLSWINLNNENHSSN	WP_013190203_2	none
29980	WP_120754718	#00FFFF	Streptomyces	Protein of unknown function (DUF2089)	PF09862.9	cc6	Streptomyces klenkii	5861	2	37.73	yes	MSTTTAEARHDFTTLTEREVEVLLLLASGEQNRRLARRLGIAERTVRAHTANIVRKLDLRSRFEAAIVSHVYADAIRASAPDGRPRGCVAV	WP_120754718_2	2.30E-05
29981	WP_107115831	#00FFFF	Streptomyces	Protein of unknown function (DUF2089)	PF09862.9	cc6	Streptomyces globisporus C-1027	6115	3	48.61	yes	MTMMADERMRTGGRAGDAVGGRPEMDFATLTERELEVLVLLASGEQNRWLARRLGITERTVRAHTSSIVRKLNLKSRFEAAIVSYLHAEDIRGHQGAASAI	WP_107115831_3	4.20E-05
29983	WP_044377254	#00FFFF	Streptomyces	Protein of unknown function (DUF2089)	PF09862.9	cc6	Streptomyces badius	6183	1	50.07	yes	MTMMADERMRTGGRAGAADGGRPEMDFATLTERELEVLVLLASGEQNRWLARRLGITERTVRAHTTSIVRKLNLKSRFEAAIVSYLHAEDIRGHQGAASVI	WP_044377254_1	4.80E-05
29985	WP_097866484	#00FFFF	Streptomyces	Protein of unknown function (DUF2089)	PF09862.9	cc6	Streptomyces sp. rh34	5972	2	37.76	yes	MTAMTDRQVLDFTTLTEREREVLALLAGGEQNRWLARRLGITERTVRAHTSSIVRKLNLKSRFEAAIVSNLYAEDIRGLRP	WP_097866484_2	4.60E-05
29987	WP_126393842	#00FFFF	Streptomyces	Protein of unknown function (DUF2089)	PF09862.9	cc6	Streptomyces sp. MK-45	6014	2	49.76	yes	MTVVVREDALDFSALTDREREVLLLLATGEQNRWLARRLGIAERTVRAHTASIVRKLGIKSRFEAAIVSHLYADDIRGACG	WP_126393842_2	4.90E-05
29989	WP_141310912	#00FFFF	Streptomyces	Protein of unknown function (DUF2089)	PF09862.9	cc6	Streptomyces spinoverrucosus	6069	2	51.52	yes	MAVVVQEHAPDFTALTDREREVLLLLATGEQNRRLARRLGIAERTVRAHTASIVRKLALTSRFEAAIVSHLYADDIRGARG	WP_141310912_2	3.90E-05
29991	WP_051840194	#00FFFF	Streptomyces	Sigma-70, region 4	PF04545.16	cc6	Streptomyces lavendulae subsp. lavendulae	6001	5	35.15	yes	MNHEHSTGEVALKPLTENHPLDFSCLTGREVEVLLLLASGEQNRRLARHLGIAERTIRAHTASIVRKLRLKSRFEAAIVAHLYADDIKDLETTQQRSAA	WP_051840194_5	7.20E-05
29993	WP_018960901	#00FFFF	Streptomyces	Protein of unknown function (DUF2089)	PF09862.9	cc6	Streptomyces sp. CNB091	6281	2	37.52	yes	MTTMMDRQVLDFTTLTEREREVLALLAGGEQNRWLARRLGITERTVRAHTSSIVRKLNLKSRFEAAIVSNLYAEDIRGLRP	WP_018960901_2	5.20E-05
29995	WP_114054648	#00FFFF	Streptomyces	Sigma-70, region 4	PF08281.12	cc6	Streptomyces globosus	6712	2	25.04	yes	MLGGAVHDPRGIGTLTERERQVLALLGQGLANRVIARRLGIVERTAKAHVASIVEKLGVSSRLEAALMAHLHHELLCPRETVPTDTSPRANGRHLQRGC	WP_114054648_2	4.10E-08
29997	WP_159770677	#00FFFF	Streptomyces	Protein of unknown function (DUF2089)	PF09862.9	cc6	Streptomyces sp. HM190	6562	3	50.81	yes	MAVAVREDALDFSALTDREREVLLLLATGEQNRWLARRLGIAERTVRAHTASIVRKLDLKSRFEAAIVSHLYEDDIRQTCG	WP_159770677_3	7.40E-05
29998	WP_158686821	#00FFFF	Streptomyces	Sigma-70, region 4	PF08281.12	cc6	Streptomyces sp. CNT372	6923	3	7.29	yes	MMSHAAESCGCALFRGAVHDARGIAKLTDRERQVLTLLGQGLPNRLIARRLGIVERTAKAHVASIVDKLGVSSRLEAALMAHLHHDLLCPEKPCPDGHLPKGQ	WP_158686821_3	2.70E-09
30000	WP_159688203	#00FFFF	Streptomyces	Preprotein translocase subunit Sec66	PF09802.9	cc6	Streptomyces sp. Tu 2975	6989	2	10.78	yes	MDAKSHAACRCECALLQGAVNDVRGFAKLTDRERQVLTLLGQGLANRLIARRLGIVERTAKAHVSSIVEKLGVSSRLEAGLMAHLHHELLCPAGHCPEGHLTNDQ	WP_159688203_2	1.30E-05
30003	WP_124271963	#00FFFF	Streptomyces	Protein of unknown function (DUF2089)	PF09862.9	cc6	Streptomyces sp. ADI96-02	6094	2	42.46	yes	MEETAVISMTERPVLDFAMLTERELEVLVLLASGEQNRWLARRLGIAERTVRAHTTSIVRKLNLKSRFEAAIVSHLYAEDIRGLRP	WP_124271963_2	3.70E-05
30010	WP_031017311	#00FFFF	Streptomyces	Protein of unknown function (DUF2089)	PF09862.9	cc6	Streptomyces sp. NRRL WC-3795	5826	1	63.07	yes	MAVAVQDKAHDISTSGASAGVSALDVSAPRLSGLDFSALTGRELEVLLLLATGEQNRRLARRLGIAERTVRAHTASIVRKLGLTTRFEAAIVAHLYADDIRGARG	WP_031017311_1	4.10E-05
30012	WP_096622718	#00FFFF	Streptomyces	Protein of unknown function (DUF2089)	PF09862.9	cc6	Streptomyces sp. WZ.A104	6233	4	35.36	yes	METAVTAMADERMTVDERMTAGGRTAAHGRAMAGGRQAMDFAALTERELEVLVLLASGEQNRWLARRLGITERTVRAHTSSIVRKLNLKSRFEAAIVSYLHAEDIRRAASVT	WP_096622718_4	1.20E-05
30017	WP_125506282	#00FFFF	Streptomyces	Putative transcription regulator (DUF1323)	PF07037.11	cc6	Streptomyces sp. WAC 01420	1626	1	19.51	yes	MRTMARTDMLKERPSECHCTGDSALFSRDFLSSLRGLTARERQILLRLAACEGNRGIARRFGITERTVKAHLTSILTKLALTSRTEATVVALRYHGQLCPAVHGDAMDQSPIAGIGCCPR	WP_125506282_1	1.10E-05
30038	WP_073726342	#00FFFF	Streptomyces	Sigma-70, region 4	PF08281.12	cc6	Streptomyces sp. CB02414	7140	2	46.55	yes	MGILLTETAAAPAGPDQLVADAGSETAMCGCEGPPTLSFDTSGVSRLTGREREVLLLVAAALPNGTIARRLGIAERTVKAHVSSIVEKLRVASRLEAALLVHLHHELICPE	WP_073726342_2	1.10E-09
30050	WP_093908736	#00FFFF	Streptomyces	Protein of unknown function (DUF2089)	PF09862.9	cc6	Streptomyces sp. cf386	5945	2	52.09	yes	MTVVVREDALDFAALTDREREVLLLLATGEQNRWLARRLGIAERTVRAHTASIVRKLDLKSRFEAAIVSHLYADDIRGHDTDGRAAA	WP_093908736_2	6.10E-05
30067	WP_051746348	#00FFFF	Streptomyces	none	none	cc6	Streptomyces scopuliridis RB72	1190	1	-23.7	no	MGEARLTLSRHTVIVTASIVRRIRGIE	WP_051746348_1	none
30113	WP_157857956	#00FFFF	Streptomyces	Protein of unknown function (DUF2089)	PF09862.9	cc6	Streptomyces durhamensis	6324	2	54.8	yes	MTVVVQDAAPDFSTLTEREREVLLLLATGEQNRWLARRLGIAERTVRAHTASIVRKLDLTSRFQAAIVSHLYADDIRADHG	WP_157857956_2	3.50E-05
30141	WP_058047489	#00FFFF	Streptomyces	Protein of unknown function (DUF2089)	PF09862.9	cc6	Streptomyces sp. MBT76	6051	2	38.19	yes	MRSAIAEGQHDFTTLTDREVEVLLLLASGEQNRRLARRLGIAERTVRAHTANIVRKLDLRSRFEAAIVSHVYAEDIRSLCSTGGRVAA	WP_058047489_2	2.60E-05
30159	WP_015127932	#400040	Calothrix	none	none	cc8	Calothrix sp. PCC 7507	3943	6	26.14	yes	MSVITISDLDSIREEQLLTELNIWEMSNIEGGRRRRRRGSTSEVNTSGILSKDQINQTVNQWLDNVDIQIADLREQLSG	WP_015127932_6	none
30160	WP_114082527	#400040	Nostoc	none	none	cc8	Nostoc sp. ATCC 53789	4318	8	20.43	yes	MILISNLHPNSDVNLLTELTDWEMRTVEGGRRRRSTRDEEDTSGALSRENIKETVNDWLSNIEQQIVDLRQQLTGLQ	WP_114082527_8	none
30162	WP_138499068	#400040	Nostoc	none	none	cc8	Nostoc sp. PA-18-2419	4174	7	23.58	yes	MTRIIISNLQVPNSEENLLTELTIWQMRSVEGGIRRITKEDNSGMLSSENIKQTVSDWLANIDKQIVDLRNQLSV	WP_138499068_7	none
30164	WP_071189061	#400040	Trichormus	none	none	cc8	Trichormus sp. NMC-1	2899	5	22.75	yes	MGIQIYDLYSSSEVQLIHDLTAAQMKNINGGIAYRRGRNRRTSTTDSSERSALLQDVNTSVQNWRLELNQTLDNLGQTELEF	WP_071189061_5	none
30165	WP_096569967	#400040	Sphaerospermopsis	none	none	cc8	Sphaerospermopsis kisseleviana NIES-73	3766	9	26.98	yes	MGIKIYDLYPNHDAQFIQEATLGEMINIKGGFGRRRRRDPSTTLESSDISALMEDINTNLDRWRMDIDTTLEDLRQSINF	WP_096569967_9	none
30167	WP_013190203	#400040	Trichormus	AbiTii	PF18864.1	cc8	Trichormus Nostoc azollae 0708	2341	3	27.78	yes	MGIQIYDLYSTHEVQMIDKLTSSEMKNINGGIMNRRRRDRNPTTTDRSNLSALVADIKTNVGNWRLELNKTIDNLREERLDF	WP_013190203_3	3.40E-06
30169	WP_057178590	#400040	Cylindrospermopsis	none	none	cc8	Cylindrospermopsis raciborskii GIHE 2018	2653	7	27.7	yes	MDIKISDLYPNGDGDLLQEVTPGEMVNIQGGVRRRRRNSNSVESGDISQILGRVNDNLERWRVEIDDTLDQLRDSVTF	WP_057178590_7	none
30171	WP_009343975	#400040	Cylindrospermopsis	Telomere capping, CST complex subunit	PF12658.7	cc8	Cylindrospermopsis raciborskii CENA303	2702	3	31.34	yes	MDIKISDLYPNGDGDLLQEVTPGEMVNIKGGVRRRRRNPNSVESVDISQVLGRVNDNLERWRAEIDDTLDELRDSVTF	WP_009343975_3	2.70E-05
30175	WP_016950446	#400040	Anabaena	none	none	cc8	Anabaena sp. PCC 7108	2941	5	33.76	yes	MCLNSIQNSMEGGDSNMNIKIYDLCPSSKVQMLNELSLREMRTIKGGIQMGEDENTATRNNFAEVMKEVNGNIAIWRTEIDETLKNLRQGMNF	WP_016950446_5	none
30177	WP_015212417	#400040	Anabaena	none	none	cc8	Anabaena cylindrica PCC 7122	3477	5	28.4	yes	MIGIKIYDLYPGNDAQFLDEQTSLEMTNIQGGLTNVFNNNNGRGRRRSEPSTTTGGSSSSDLSALIEDINTSLAAWRLELNGSLDNLRQGLSF	WP_015212417_5	none
30181	BAZ29283	#400040	Cylindrospermum	Family of unknown function (DUF5304)	PF17230.2	cc8	Cylindrospermum sp. NIES-4074	3800	6	24.0	yes	MVRITISDLYPSRDEQFIDELSAGEMLAVAGGSRRRRRRRQRGSSTGDTAEVTNIMDQIDNRIDQIGSDLNQTNEDLQKQFGY	BAZ29283_6	3.30E-06
30182	WP_069073064	#400040	Nostoc	Putative DNA-binding domain	PF18430.1	cc8	Nostoc sp. KVJ20	4221	3	32.4	yes	MVRITISDLHPIGEDKQFDELTDQEMKTVEGGARRRRRGSRTSVSDPSGIVTELNDRFDNWMDILNNKLGDVQTEIVESL	WP_069073064_3	0.0001
30185	WP_066383651	#400040	Anabaena	none	none	cc8	Anabaena sp. 4-3	4415	7	32.72	yes	MVKIIISDLSPSDDQKFIHDLTLWEMMNVYAGLERRYGRRRNSNPAPIEEASPASMPDTNAILSQWMDNLDLQLKDLRGQLGIPQ	WP_066383651_7	none
30187	WP_103136595	#400040	Nostoc	HTH-like domain	PF13276.6	cc8	Nostoc sp. CENA543	2987	4	42.51	yes	MGKIKIYDLFPENEDKFIQELSSWEMKGIYAGSEPRYGYGRRPPVQEEEPTSVTVADANNTLDRWLNNLELQIQDLRRQLGVPR	WP_103136595_4	3.50E-05
30189	WP_096681247	#400040	Nostoc	none	none	cc8	Nostoc sp. NIES-2111	4090	9	37.28	yes	MVRIKISDLSADDEGKHISELAAWEIKKVYAGMPRRFGTDSLSDTPKETPLENSSENSGFSFNGMSGNISGLMDNLEVQLRDIRSRLGI	WP_096681247_9	none
30191	WP_011321056	#400040	Trichormus	MerR, DNA binding	PF09278.11	cc8	Trichormus variabilis 0441	4689	6	32.01	yes	MVKITISDLSPDDEGKSLKDLTTWELKSVYAGLERRYGGRRNQVAEPSEESTTPTLNDTNGTLDRWMDSLELQIQDLRKQLGINS	WP_011321056_6	8.00E-06
30193	WP_010996095	#400040	Nostoc	none	none	cc8	Nostoc sp. PCC 7120 = FACHB-418	3634	2	35.17	yes	MVRITISDLSPDDEGKSLKDLTTWELKSVYAGLERRYGGRRNRVAEPSEESTPPTLNDTNGTLDRWMDSLELQIQDLRQQLGINS	WP_010996095_2	none
30200	WP_012409362	#400040	Nostoc	none	none	cc8	Nostoc punctiforme PCC 73102	5139	10	15.19	yes	MIVISNLHPNNDVNLITELTDWEMRTVEGGRRRSRRDDEDTATTLSTQKVKETVNDWLSKMEEQIVDLRKQLTGLQ	WP_012409362_10	none
30204	WP_026100063	#400040	Fortiea	none	none	cc8	Fortiea contorta PCC 7126	4559	8	39.28	yes	MVKIKVYDLSPDESGKFINELNAWDMKTVYAGYIGWDRRYSRETPPVAQPEEPNTPIVDKANANLAQWMDSLEVQIKDLRKQFGISQ	WP_026100063_8	none
30211	WP_015210601	#400040	Cylindrospermum	Type-A lantibiotic	PF04604.13	cc8	Cylindrospermum stagnale PCC 7417	2921	4	17.57	yes	MVSITISDLYPTKDEQLLDELSHDEMKTVAGGTRRRRRRGSNSVDTEDVATVIQSLDDQIQQMTINLNETSAKLRSQLGI	WP_015210601_4	6.60E-05
30214	WP_124970176	#003366	Aphanothece	none	none	cc7	Aphanothece sacrum FPU1	3895	5	30.4	no	MEKSLIESNKLEETSENKDLKQPILPRSAWNSNIAYLRALFKVKKALDRIEEEAGIINRE	WP_124970176_5	none
30215	WP_087592205	#003366	Cyanobacteria	none	none	cc7	Cyanobacteria unicellular cyanobacterium SU3	1340	7	23.33	yes	MEKNLIESNQKSNQAILPRSAWVSNVAYLRALFKAKKALDRIEEEAKITHKSNSFY	WP_087592205_7	none
30217	WP_167721203	#003366	Tolypothrix	none	none	cc7	Tolypothrix sp. PCC 7910	1897	9	24.68	yes	MNDSSINSLPKTDVDQSPADLDSPAPLLPRLAWNSQIAYMRVVFKAKKALDRIEQEAGTLGKY	WP_167721203_9	none
30219	WP_012597836	#003366	Gloeothece	none	none	cc7	Gloeothece citriformis PCC 7424	1322	8	22.09	yes	MEKTEQSFNEPLLPRSAWSNNLTYLQTLFKAKKALDRIEKESGIIRRKNS	WP_012597836_8	none
30221	WP_096589596	#003366	Calothrix	none	none	cc7	Calothrix sp. NIES-2098	1783	11	23.57	yes	MNDSSTDRLPTTDGDRSPSELDSQEPLLPRLAWNSQIAYMRVVFKAKKALDRIEKEAGILSINK	WP_096589596_11	none
30223	WP_012595952	#003366	Rippkaea	none	none	cc7	Rippkaea orientalis PCC 8801	1321	4	34.14	yes	MEKSLIESSGLERTPENEAAKQPILPRSAWNSNIAYLRTLFKVKKALDKIEEEAGIIEK	WP_012595952_4	none
30225	WP_086760950	#003366	Nostoc	none	none	cc7	Nostoc sp. RF31YmG	2022	10	22.25	yes	MNDSSTDYLPTTDGDRSPLELDSQEPLLPRLAWNSQIAYMRVVFKAKKALDRIEKEAGILSINK	WP_086760950_10	none
30228	TVP63782	#003366	Nodularia	none	none	cc7	Nodularia sp. (in: Bacteria)	1922	7	11.43	no	MSTKEMNSNLDSSSNQTQAELNSPEPLLPRSAWNSQLAYLRLVFRAKKALDRIEDEPNHLK	TVP63782_7	none
30231	WP_168643398	#003366	Dolichospermum	none	none	cc7	Dolichospermum sp. UHCC 0259	1668	8	20.05	yes	MNNISPDSITLENPNTLAKSESSSDTPQHLLPRLAWDSQITYLRLLFRAKKALDRIEKEAGISINR	WP_168643398_8	none
30238	WP_012409787	#003366	Nostoc	none	none	cc7	Nostoc punctiforme PCC 73102	1203	6	19.48	yes	MSSKFIPPEDPNITHIEQSQNEVEPLLTLLPRSAWNSQLNYLRLIFRAKKALDRIEKEAGIFKSYN	WP_012409787_6	none
30240	BBD66616	#003366	Nostoc	none	none	cc7	Nostoc commune HK-02	821	5	21.88	yes	MDNISTDIPSENTTVSDSQATVLPRSPWNSQLAYLRVIFRAKKALDRIEKEAGVLRNEN	BBD66616_5	none
30242	AVH79607	#003366	Nostoc	none	none	cc7	Nostoc sp. PCC 9205	3567	6	9.62	no	MSINSQDSETSSQVEPILPRSAWNSQIAYLKVLFRAKKALERIEQEAANNKPEV	AVH79607_6	none
30246	AVH79662	#003366	Desmonostoc	none	none	cc7	Desmonostoc muscorum PCC 7121	2857	6	14.07	yes	MDNNSVSNPTDGNLKLLPDESQNQINSANFLLPRSAWSSQVAYLRVLFRAKKALDRIEKEAK	AVH79662_6	none
30248	WP_015216084	#003366	Anabaena	none	none	cc7	Anabaena cylindrica PCC 7122	3085	11	18.09	no	MNNIDLDSVATEDTNTLASEDSSDTPQRLLPRLAWDSQTTYLRLIFRAKKALDRIETEAGISRF	WP_015216084_11	none
30250	AVH79456	#003366	Roholtiella	YLP motif	PF02757.17	cc7	Roholtiella [Tolypothrix] sp. PCC 7415	2448	6	22.64	no	MPTDYLPPAESSLNQSPAELDSQEPLLPRLAWNSQITYLRVIFKAKKALDRIEKEAGLVGIAN	AVH79456_6	7.60E-06
30263	WP_019501037	#003366	Pseudanabaena	none	none	cc7	Pseudanabaena sp. PCC 6802	3996	4	13.45	yes	MASFIPLEPAERSTSDLTLLPRDPWPNQLQYLLLVFQAKQALERVEKAFILN	WP_019501037_4	none
30316	WP_104899482	#003366	Nostoc	none	none	cc7	Nostoc sp. Peltigera membranacea cyanobiont N6	2009	6	21.71	yes	MNNISTDSLASENITVPESQVTLLPRSAWNSQLAYLRIIFRAKKALDRIEKEAGVCKS	WP_104899482_6	none
30331	AVH79628	#003366	Nostoc	none	none	cc7	Nostoc sp. PCC 9201	2814	6	17.86	yes	MDNNSVSNPVDSNLNLSPNDSQSQVNSANFLLPRSAWSSQVAYLRVIFRTKKALDRIEQEAKYEYSNLK	AVH79628_6	none
30358	WP_096679519	#003366	Nostoc	none	none	cc7	Nostoc sp. NIES-2111	2778	5	31.43	yes	MEINSESSNKNLGSIPTTNNLETLANDSQLLGNADEFLLPRSAWNSQVAYLRAVFRAKKALDKIELAAEWLPNVKS	WP_096679519_5	none
30370	WP_103138325	#003366	Nostoc	DNA Polymerase alpha zinc finger	PF08996.10	cc7	Nostoc sp. CENA543	61	9	15.8	no	MSTNITNSETSVQNISQTQVEPSLPRSAWNSQLAYFKVMFRAKKALDRIEKEAGIENNYS	WP_103138325_9	2.40E-06
30385	WP_105988468	#808000	Lactobacillus	none	none	cc9	Lactobacillus timberlakei	2087	5	10.12	yes	MIFIKTNNLLKGYVSYTTPLDVQKSAVEENRLGNVGTSVSLSVSYSASVSWSWSWSF	WP_105988468_5	none
30386	WP_107397356	#808000	Staphylococcus	Domain of unknown function (DUF5039)	PF16442.5	cc9	Staphylococcus capitis	2178	1	22.15	yes	MKSLLLNGYKNYTSASEIQKNAVDDSELGNVGTSVSLSVTYSASVSWTVSWSA	WP_107397356_1	4.30E-06
30388	WP_088612422	#808000	Bacillus	none	none	cc9	Bacillus amyloliquefaciens	2221	2	10.83	yes	MKNLISGYTAYTSPVEVQKSANEENQLGNVGTSLSLSVSVSYSVSWSWSVSF	WP_088612422_2	none
30390	WP_162681093	#808000	Staphylococcus	none	none	cc9	Staphylococcus sp. MI 10-1553	2195	4	15.59	yes	MKDLLFNGYSNYTTANNIQKCAVDECELGNVGTSISLSVTYSYSISWTITWSV	WP_162681093_4	none
30392	WP_016898474	#808000	Staphylococcus	none	none	cc9	Staphylococcus capitis	1155	1	13.77	yes	MENILINGYSHYTSSNNIQRSAIEERDLGDGRTSSISASVSYTVTWSAA	WP_016898474_1	none
30394	WP_129202808	#808000	Xylanimonas	none	none	cc9	Xylanimonas allomyrinae	2270	2	34.58	yes	MHNVLGGYTAYASPSEIQNIALNEAELGNVGTSVSLSVSYSLSLSWSWSWT	WP_129202808_2	none
30396	WP_037567380	#808000	Staphylococcus	none	none	cc9	Staphylococcus agnetis	2162	3	21.51	yes	MKNLLFDGYSNYTTSNDIHKCAVEECELGNVGTSISLSVTYSASVSWTVTWSA	WP_037567380_3	none
30398	WP_030061393	#808000	Staphylococcus	none	none	cc9	Staphylococcus capitis	1163	1	16.96	yes	MENILINGYSHYTSSNNIQRSAIEERDLGDGRTSSISASVSYTVTWSAA	WP_030061393_1	none
30400	WP_096547181	#808000	Staphylococcus	none	none	cc9	Staphylococcus delphini	2188	5	16.29	yes	MKDLLFNGYSNYTTANNIQKCAVEECELGNVGTSISLSVTYSASVSWTITWSV	WP_096547181_5	none
30402	WP_102695456	#808000	Lactobacillus	none	none	cc9	Lactobacillus iners	2193	1	21.63	yes	MEKSILDGYTTYTTPAEVQKSAVEDNQLGNVGTSITVSVSYSASVSWTFSWSF	WP_102695456_1	none
30404	WP_027975917	#808000	Streptococcus	none	none	cc9	Streptococcus devriesei DSM 19639	2196	4	8.72	yes	MSKSFLNGYTNYTTPSEVQKSVIEDSKLGNVGTSVTVTVSWSWSVTVSWTVG	WP_027975917_4	none
30406	EES41370	#808000	Staphylococcus	none	none	cc9	Staphylococcus caprae M23864:W1	1146	3	5.93	yes	MENILFNGYSRYTTSNHIQRSALEERDLGDGRTSSISASVSYTVTWSAA	EES41370_3	none
30408	WP_068252194	#808000	Rathayibacter	none	none	cc9	Rathayibacter tritici	2387	2	29.58	yes	MERSLLSGYTAYASPTEIQSIVLNDAELGDVGTSVSLSVSVSYSLSFSWSWSWT	WP_068252194_2	none
30421	WP_017569537	#808000	Nocardiopsis	none	none	cc9	Nocardiopsis halotolerans DSM 44410	2254	2	49.16	yes	MDKNITQDLLEGYTAYSAPAEIQNETLAGSRLNNVGTSVSLSVSYSVSVSWSVSWT	WP_017569537_2	none
30431	WP_104263878	#808000	Rathayibacter	none	none	cc9	Rathayibacter iranicus NCPPB 2253 = VKM Ac-1602	2415	2	9.77	yes	MERSLLSGYTAYASPTEIQSIVLNDAQLGDVGTSISISVSYSLSFSWSWSWT	WP_104263878_2	none
30436	WP_068208510	#808000	Rathayibacter	none	none	cc9	Rathayibacter tanaceti	2418	2	29.0	yes	MERSLLSGYTAYASPTEIQSIVLNDAELGDVGTSVSLSVSVSYSLSFSWSWSWT	WP_068208510_2	none
30489	WP_088679810	#808000	Bacillus	none	none	cc9	Bacillus subtilis subsp. subtilis	2216	1	9.02	yes	MKNLISGYTAYTSPVEVQKSANEENQLGNVGTSLSLSLSVSYSASVSWSWSVSF	WP_088679810_1	none
30520	WP_103031749	#808000	Bacillus	none	none	cc9	Bacillus subtilis	2218	1	11.9	yes	MKNLISGYTAYTSPVEVQKSTNEENLLGNVGTSVSLSVVSVSWSATWSF	WP_103031749_1	none
30534	WP_017595611	#FA8072	Nocardiopsis	thiovirid_RiPP: thioviridamide family RiPP peptide	NF033415.1	cc10	Nocardiopsis potens DSM 45234	8938	9003	61.68	yes	MPAVTQNIEELAAQIKAAEAEVVADQGEALDLSSLTGLDEAELQTLLESKSGISADEDAQGSVMAAAASVAAHC	WP_017595611_9003	8.80E-33
30535	WP_129307706	#FA8072	Streptomyces	thiovirid_RiPP: thioviridamide family RiPP peptide	NF033415.1	cc10	Streptomyces sp. L2	2511	1	39.53	yes	MTEKTQITDVQAFEDLVAKVQEMDGAAEASSTVAALAGLDAAELQTFLEEKSGISPDEEAQGSVMAAAASVALHC	WP_129307706_1	2.70E-31
30537	WP_065960366	#FA8072	Streptomyces	thiovirid_RiPP: thioviridamide family RiPP peptide	NF033415.1	cc10	Streptomyces sparsogenes DSM 40356	1183	1	60.3	yes	MSEAMVSAVDEAAFADLVSKIQDAEASMTDEQRAVIDPAAGEKALEELAGVSPEELQAFLEEKAGISPDEEAQGSVMAAAATVAFHC	WP_065960366_1	2.10E-40
30539	BAN83919	#FA8072	Streptomyces	thiovirid_RiPP: thioviridamide family RiPP peptide	NF033415.1	cc10	Streptomyces olivoviridis	2718	1	41.52	yes	MTEKTQITDVQAFEDLVAKVQEMDGPAQASSTVAALAGLDAAELQNFLEEKSGISPDEEAQGSVMAAAASIALHC	BAN83919_1	5.20E-32
30541	WP_161634174	#FA8072	Nocardiopsis	Protein of unknown function (DUF2397)	PF09660.10	cc10	Nocardiopsis potens DSM 45234	259	2	61.68	yes	MPAVTQNIEELAAQIKAAEAEVVADQGEALDLSSLTGLDEAELQTLLESKSGISADEDAQGSVMAAAASVAAHC	WP_161634174_2	9.40E-06
30543	WP_159037419	#FA8072	Streptomyces	thiovirid_RiPP: thioviridamide family RiPP peptide	NF033415.1	cc10	Streptomyces sp. NRRL S-4	1175	1	57.19	yes	MSETTTAAQVDEVAFSDLVSKIKEAELAMTDEQRAVIDPAAGEKALEELAGVSPEDLQAFLEEKAGISPDEEAQGSVMAAIATVAYHC	WP_159037419_1	1.40E-40
30545	BBC15200	#FA8072	Streptomyces	thiovirid_RiPP: thioviridamide family RiPP peptide	NF033415.1	cc10	Streptomyces sp.	1171	1	54.49	yes	MSEAMVSAVDEAAFADLVSKIQDAEASMTDEQRAVIDPAAGEKALEELAGVSPEELQAFLEEKAGISPDEEAQGSVMAAAATVAFHC	BBC15200_1	2.10E-40
30547	WP_046417231	#FA8072	Streptomyces	thiovirid_RiPP: thioviridamide family RiPP peptide	NF033415.1	cc10	Streptomyces malaysiense	1184	1	70.7	yes	MSEAMVSAVDETAFADLVSKIQDAEASMTDEQRAVIDPASGEKALQELAGVSPEELQAFLEEKAGISPDEEAQGSVMAAAATVAFHC	WP_046417231_1	1.10E-40
30551	WP_020634200	#FA8072	Amycolatopsis	thiovirid_RiPP: thioviridamide family RiPP peptide	NF033415.1	cc10	Amycolatopsis alba DSM 44262	1112	1	62.31	yes	MNSHDDAVAPSISDQDIENLVAQITTAETATTEDGLSLSDVSGFSEEELQRFLEEKAGLTAASGVQQSVIGFAVTIAVHC	WP_020634200_1	2.60E-23
30553	WP_131980220	#FA8072	Actinomadura	thiovirid_RiPP: thioviridamide family RiPP peptide	NF033415.1	cc10	Actinomadura sp. 6K520	1118	1	61.43	yes	MATLWSGERDRRAPAEWGVMEKNEDVVTASVPEADIEKLVQQIQADDAANAELGEVDLSFAEISGLSDEELQKFLEEKASVTAASGVQQSVIGFAVTIGVHC	WP_131980220_1	3.70E-22
30556	WP_091117926	#FA8072	Micromonospora	Sensors of blue-light using FAD	PF04940.12	cc10	Micromonospora eburnea	1984	2	39.68	yes	MTAPAQNIEELISQIQADESNTAAAVDSIDASFSELAGVSSEELQKFLEEQVGMNPDEGVQGTFVSVVVTPATHC	WP_091117926_2	0.01
30562	WP_018962004	#FA8072	Streptomyces	HD containing hydrolase-like enzyme	PF12917.7	cc10	Streptomyces sp. CNB091	1173	1	38.53	yes	MSETATTQVDEAAFGDLVSKIKEAELAMTDEQRSVIDPAASEKALEELAGVSPEDLQAFLEEKAGISPDEEAQGSVMAAIATVAYHC	WP_018962004_1	1.00E-05
30571	WP_106236741	#FA8072	Nonomuraea	thiovirid_RiPP: thioviridamide family RiPP peptide	NF033415.1	cc10	Nonomuraea fuscirosea	1094	1	64.13	yes	MTAIVPEHNLDEIVAQIRAEESAADFDTSETAFSELAGVSPEDLQQFLEEQVGLSPDEGIQGSFTGIIVTAGVHC	WP_106236741_1	1.00E-28
30573	WP_044449646	#FA8072	Mastigocladus	Mrr N-terminal domain	PF14338.6	cc10	Mastigocladus laminosus UU774	1139	1	25.25	yes	MSDSIDNVMNQLPLSEEELRELMNRIKQVEAGSMQLHEVAGVSPEELQEFLENKAGLSPEEESQGSPMAAAVSIAYHC	WP_044449646_1	0.0043
30580	WP_030193573	#FA8072	Streptomyces	thiovirid_RiPP: thioviridamide family RiPP peptide	NF033415.1	cc10	Streptomyces sp. NRRL S-87	1172	1	65.96	yes	MSEAMASAVDEAAFADLVSKIQAAEASMTDEQRAVIDPAAGEKALEELAGVSPEELQAFLEEKAGISPDEEAQGSVMAAAATVAFHC	WP_030193573_1	2.50E-40
30618	WP_039653089	#FA8072	Streptomyces	thiovirid_RiPP: thioviridamide family RiPP peptide	NF033415.1	cc10	Streptomyces sp. MUSC 125	1180	1	56.06	yes	MSEAMVSAVDETAFADLVSKIQDAEASMTDEQRAIIDPASGEKALEELAGVSPEELQAFLEEKAGISPDEEAQGSVMAAAATVAFHC	WP_039653089_1	6.90E-41
30632	WP_062348671	#EE82EE	Herbidospora	Transmembrane protein 65	PF10507.9	cc11	Herbidospora yilanensis	1671	4	51.73	yes	MTSVTVALPAVEEKTADPQVMKDVNDALMGISGFAEFSAATNGFLKGDIDVEQALEAMAPFLRGEICRDEADRERMIQLGQTIEAKCGWASVLATLTACTAAFSCSGFCC	WP_062348671_4	9.20E-06
30633	WP_131969051	#EE82EE	Actinomadura	Levansucrase/Invertase	PF02435.16	cc11	Actinomadura sp. KC06	1652	2	46.9	yes	MTAPVTTTTATVTEQSRGPQAVRDLNDALHGIDGFSEFNAAAQGFIKGEIGIEQAIEVMTPFLQGDIVQDEQERERLIQLGQTIEAQCGWVSVTASVTACTPTFSCSVICC	WP_131969051_2	2.10E-06
30635	PZN45587	#EE82EE	Actinobacteria	none	none	cc11	Actinobacteria bacterium	1639	1	45.19	yes	MSTSQLELTGVAEKTADPQVMKDVANALHSMRGYTEFAAAANGFLKGDIDLERAVEAMIPFLQGEICKGADQRERLLQLGQTLQEKCGWVSITASITGCTPAFSCSIICC	PZN45587_1	none
30637	WP_137248807	#EE82EE	Herbidospora	Transmembrane protein 65	PF10507.9	cc11	Herbidospora galbida	1681	4	51.42	yes	MTSVTATLPAVEEKTADPEVMKDVNEALMGISGFAEFSAATNGFLKGDVDMEQALEAMAPFLRGEICRDEADRERMIQLGQTIEAKCGWASVLATLTACTAAFSCSGFCC	WP_137248807_4	9.20E-06
30639	WP_161483240	#EE82EE	Herbidospora	Transmembrane protein 65	PF10507.9	cc11	Herbidospora sp. NEAU-GS84	1673	4	51.37	yes	MTSVTATLPAVEEKTADPQVMKDVNDALMGISGFAEFSAATNGFLKGDIDVEQALEAMAPFLRGEICRDEADRERMIQLGQTIEAKCGWASVLATLTACTAAFSCSGFCC	WP_161483240_4	9.20E-06
30641	WP_062348671	#EE82EE	Herbidospora	none	none	cc11	Herbidospora yilanensis	1143	3	52.42	yes	MPENVEGNSVPEGYDILEQINLELKSIDGAADYRAAALGFIKGDLELDDAIEAMTRVLHGDGYGNADHRRRIIELAQTAEERCGFITITVSIAGCTAAFSCSMGCC	WP_062348671_3	none
30642	CNF13542	#EE82EE	Mycobacterium	none	none	cc11	Mycobacterium tuberculosis	1146	5	25.89	yes	MTSEDSVPDSYDLLEQIRLELLSIDGMADFAGAASGFIRGELELDEAAAVMTRFLRGDGYGDADERNRVIQLAQTVEARCGFVAITVSISACTAAFSCSLACC	CNF13542_5	none
30644	WP_062437448	#EE82EE	Herbidospora	none	none	cc11	Herbidospora daliensis	1142	3	55.93	yes	MPEGYDILEQINLELKSIDGAADYRAAALGFIKGDLELDDAIEAMTRVLHGDGYGNADHRKRIIELAQTAEERCGFVTITVSIAGCTAAFSCSMGCC	WP_062437448_3	none
30646	WP_161483240	#EE82EE	Herbidospora	none	none	cc11	Herbidospora sp. NEAU-GS84	1142	3	55.23	yes	MPENVEGNSVPEGYDILEQINLELKSIDGAADYRAAALGFIKGDLELDDAIEAMTRVLHGDGYGNAEHRRRIIELAQTAEERCGFITITVSIAGCTAAFSCSMGCC	WP_161483240_3	none
30648	WP_131969051	#EE82EE	Actinomadura	none	none	cc11	Actinomadura sp. KC06	1190	3	43.54	yes	MTSEDSMTESRDLLEEIRLELLSIDGMADFATAASGFIHGEVELEEATAVMTRFLRGDGYGDADERSRVIELAQTIEARSGFVAITVSISACTAAFSCSLACC	WP_131969051_3	none
30650	WP_137248807	#EE82EE	Herbidospora	none	none	cc11	Herbidospora galbida	1141	3	55.57	yes	MPEGYDILEQINLELKSIDGAADYRAAALGFIKGDLELDDAIEAMTKVLHGDGYGNAEHRKRIIELAQTAEERCGFVTITVSIAGCTAAFSCSMGCC	WP_137248807_3	none
30672	WP_030452416	#EE82EE	Herbidospora	none	none	cc11	Herbidospora cretacea	1142	3	56.72	yes	MPENVEGNSVPEGYDILEQINLELKSIDGAADYRAAALGFIKGDLELDDAIEAMTRVLHGDGYGNAEHRRRIIELAQTAEERCGFITITVSIAGCTAAFSCSMGCC	WP_030452416_3	none
30679	WP_030452416	#EE82EE	Herbidospora	Transmembrane protein 65	PF10507.9	cc11	Herbidospora cretacea	1685	4	51.87	yes	MTSVTATLPAVEEKTADPQVMKDVNDALMGISGFAEFSAATNGFLKGDIDVEQALEAMGPFLRGEICRDEADRERMIQLGQTIEAKCGWASVLATLTACTAAFSCSGFCC	WP_030452416_4	9.90E-06
30680	WP_062437448	#EE82EE	Herbidospora	Transmembrane protein 65	PF10507.9	cc11	Herbidospora daliensis	1691	4	51.21	yes	MKDVNDALMGISGFAEFSAATNGFLKGDVDVEQALEAMAPFLRGEICRDEADRERMIQLGQTIEAKCGWASVIATLTACTAAFSCSGFCC	WP_062437448_4	3.40E-06
30687	CNF13542	#EE82EE	Mycobacterium	Antitoxin VbhA	PF18495.1	cc11	Mycobacterium tuberculosis	1597	1	62.87	yes	MTAPVTGTPTAPKESSYDPRTVQSLNDALHGLDGFTEFTAAAQGFIKGEIDLEQAIEVMTPFLRGDIVQGEQERERIIQLGQTIEAQCSWASVTATITACTPTFSCSIICC	CNF13542_1	8.10E-07
30713	WP_168501874	#006400	Anabaena	none	none	cc12	Anabaena sp. UHCC 0187	1526	1	27.57	no	MERIVIYDLYPTHTETFIDDLEPKELNIILGGIFWRNNPNWGLNPNILINTVYDGINTVSTTYEGGNNFRDNKINTVDYSRTANIRIYR	WP_168501874_1	none
30714	WP_168501874	#006400	Anabaena	none	none	cc12	Anabaena sp. UHCC 0187	1185	2	22.45	no	MATIIISDLQFIEQKTFLYDLTSEQAEEILGTGILTGFLPFGRSSDVLITTVYDGINSVESAYRGPFSFSDNKIFTLDFSRTALYLIV	WP_168501874_2	none
30716	WP_015210601	#006400	Cylindrospermum	Domain of unknown function (DUF4983)	PF16356.5	cc12	Cylindrospermum stagnale PCC 7417	3216	5	16.72	no	MDKLVISDLHPTDIDSFLYDLYPAQAKTILGGLLSDQYPNARILTIHGDTNSRSTTYEGAGNYHDNKINTVDYSRSTYVWYRSW	WP_015210601_5	3.00E-06
30718	WP_168357543	#006400	Dolichospermum	none	none	cc12	Dolichospermum planctonicum UHCC 0167	1471	6	16.9	no	MATIIISDLQLLEKKTFLYDLNSQQITQILGSIFLPLGDRPAVHLSTVYDGINNPQTKYEGPFGFHDNKIFAIDFSKLSGYLVI	WP_168357543_6	none
30720	WP_015210601	#006400	Cylindrospermum	none	none	cc12	Cylindrospermum stagnale PCC 7417	2658	3	17.62	no	MTTIVITDLHPIDEKTFLHELTSEQINAISGNGILTLWSNDPDIALSTFHDGMNNTSTTYHSPFGLYDNKIFTVDFSRMTIYLVI	WP_015210601_3	none
30722	WP_168357543	#006400	Dolichospermum	none	none	cc12	Dolichospermum planctonicum UHCC 0167	1790	2	33.09	no	MERIVINNFDSTDLESFIFDLKQIESSIVLGGLVWGDYPNWGGTPNVFVMTIYDGLNSISTTYEGAGNFHDNKFHTIDYGRTVNAWVSH	WP_168357543_2	none
30724	WP_137906310	#006400	Dolichospermum	none	none	cc12	Dolichospermum planctonicum	1471	6	13.85	no	MATIIISDLQLLEKKTFLYDLNSQQITQISGSIFLPLWDRPAVHLSTVYDGINNPQTTYEGPFGFHDNKIFAIDFSKLSGYLVI	WP_137906310_6	none
30726	WP_168357543	#006400	Dolichospermum	RcsD-ABL domain	PF16359.5	cc12	Dolichospermum planctonicum UHCC 0167	1078	4	21.53	no	MATIIISHLETIDKNTFLYDLTSEEIQQIVATGILSSWGGSDLDFLLNTIQDAITNQTSSDDGLFASVARNNKIFSLDFSNPSLYLVTK	WP_168357543_4	5.90E-06
30728	WP_096559014	#006400	Nostoc	none	none	cc12	Nostoc sp. NIES-4103	1861	9	15.29	no	MAKIVISDLHPLDAKTFLHDLDLEEIDAVSGNGLVPGDNDSSNLQLTTIQDGVNNTSYKSGSLFNISDNKFFTLDFSRLTVYFII	WP_096559014_9	none
30732	WP_137906310	#006400	Dolichospermum	Galactose oxidase, central domain	PF13415.6	cc12	Dolichospermum planctonicum	1078	3	22.19	no	MATIIISDLETIDKNTFLYDLNSEEIQQIVDTDILPLSGGFDLNFLLTTIQDVITNQTSSDNGLFGSNSRNNKIFSLDFSNPSLYLVTK	WP_137906310_3	0.00019
30744	WP_137906310	#006400	Dolichospermum	none	none	cc12	Dolichospermum planctonicum	1790	2	33.49	no	MERLVINNFDYTDLESFIYDLKQIESNIVLGGLVWGDYPNWGGTPNVFVMTIYDGLNTISTTYEGAGNFHDNKFHTIDYARTVNAWVSH	WP_137906310_2	none
30750	RCJ30949	#006400	Nostoc	none	none	cc12	Nostoc minutum NIES-26	2542	11	20.65	yes	MTKTLISDFCSTDIGLFLQDLTPVQANTVRGGSNTISVINISDGVNNTVNTYEGSDSFNYRDNKVYTVDYSRSNYNLFYISD	RCJ30949_11	none
30752	RCJ30949	#006400	Nostoc	none	none	cc12	Nostoc minutum NIES-26	3030	7	24.27	yes	MSTTVNSGLHSLKINKLFYDLTSVEMATAVGGSNLTLNNIQGGINNKSDKSSVNSIDGNKLFTIDFSGLTLNFIFLIDIF	RCJ30949_7	none
30754	RCJ30949	#006400	Nostoc	none	none	cc12	Nostoc minutum NIES-26	2123	8	23.47	yes	MSKIIICELHPSDVKTFLQELTPAQAETVCGGGSPYIYITNMTDEVTINGSGYNGGDNTVEAGTNSVSYHDNKINTTDYSRSNYNIFF	RCJ30949_8	none
30762	WP_096547181	#B259B2	Staphylococcus	Protein of unknown function (DUF3430)	PF11912.8	cc14	Staphylococcus delphini	28	4	22.01	yes	MTIKILIPIIILIIIYLIVCYHDLCKINMVKYLPKWVWSIIIIISIPLGGVIYFLLGRETRGENGD	WP_096547181_4	0.0014
30763	WP_088679810	#B259B2	Bacillus	Protein of unknown function, DUF412	PF04217.13	cc14	Bacillus subtilis subsp. subtilis	507	2	7.05	yes	MEVKIIIPIIVLVIIYFYFCFSDLIKINKTNLFPKWVWAIICCISIPLGGIIYFIWGRGGLGNENR	WP_088679810_2	0.00011
30765	WP_104263878	#B259B2	Rathayibacter	Protein of unknown function (DUF1129)	PF06570.11	cc14	Rathayibacter iranicus NCPPB 2253 = VKM Ac-1602	959	1	26.0	yes	MKIEILLPVLILCLAFLVYCFVDLIRSAGTRHLPKWAWAIICAISIPLGGILYLIFGRTEQRATD	WP_104263878_1	8.90E-05
30767	WP_027975917	#B259B2	Streptococcus	Triple QxxK/R motif-containing protein family	PF15168.6	cc14	Streptococcus devriesei DSM 19639	3	3	22.8	yes	MKNAALIIIPIVIFYLAYLLFFFFDIRKNSVKYLPKWTWFLICAFVSAPLGGVIYYFVGRTEKIDHD	WP_027975917_3	8.60E-05
30769	WP_068252194	#B259B2	Rathayibacter	Putative Actinobacterial Holin-X, holin superfamily III	PF07332.11	cc14	Rathayibacter tritici	959	1	39.45	yes	MKIEILLPVLLLGLAFLIYCYVDLIRSAGTRYLPKWAWAIICAISIPLGGILYLIFGRTEQRAAQ	WP_068252194_1	1.20E-05
30771	WP_068208510	#B259B2	Rathayibacter	TMPIT-like protein	PF07851.13	cc14	Rathayibacter tanaceti	959	1	42.21	yes	MKIEILLPVLLLGLAFLIYCYVDLIRSAGTRHLPKWAWAIICAISIPLGGILYLIFGRTEQRAAE	WP_068208510_1	8.30E-05
30775	WP_088612422	#B259B2	Bacillus	Phospholipase_D-nuclease N-terminal	PF13396.6	cc14	Bacillus amyloliquefaciens	506	3	5.86	yes	MEVKIIIPIIVLVLVYFYLCLSDLIKINNTKLFPKWVWGIICCISIPLGGIIYFIWGRGGLGNENR	WP_088612422_3	2.90E-08
30780	WP_107397356	#B259B2	Staphylococcus	Cation transporting ATPase, C-terminus	PF00689.21	cc14	Staphylococcus capitis	26	2	22.12	yes	MDLKILFPIIIIIIIYLIICFVDLFKVKKTKFLPKWVWGIIICISIPLGGILYYLLGRDILGEDNE	WP_107397356_2	0.00018
30783	WP_037567380	#B259B2	Staphylococcus	Poxvirus virion envelope protein A14	PF05767.12	cc14	Staphylococcus agnetis	20	2	21.88	yes	MDIKILVPILLLLVLYLIVCFYDLVKVNDTKYLPKWIWGIIICISIPLGGIVYFLFARKISGEENE	WP_037567380_2	2.70E-05
30791	WP_129202808	#B259B2	Xylanimonas	Polysaccharide biosynthesis C-terminal domain	PF14667.6	cc14	Xylanimonas allomyrinae	962	1	40.66	yes	MDQPAILVPAVVLAAAFVVYCYVELARATEVRFLPKWGWAVAVAISVPLGGIVYLLAGRSETGSDA	WP_129202808_1	0.0001
30793	WP_017569537	#B259B2	Nocardiopsis	Domain of unknown function (DUF4131)	PF13567.6	cc14	Nocardiopsis halotolerans DSM 44410	956	3	44.55	yes	MPVPPLELLLPAILVGVAFLGYCYFDLYRVAETRFLPKWAWGVLCALSIPFGGIAYLLLGRGHTSHA	WP_017569537_3	3.10E-05
30812	WP_162681093	#B259B2	Staphylococcus	Protein of unknown function (DUF3430)	PF11912.8	cc14	Staphylococcus sp. MI 10-1553	14	3	22.78	yes	MDMYIKILIPIIILIIIYLFICYRDLYKINMVKYLPKWGWSIIIIISIPLGGVIYFLFGRETRGDNG	WP_162681093_3	0.00013
30820	WP_060892878	#00FF00	Streptomyces	Helix-turn-helix domain	PF12840.7	cc13	Streptomyces europaeiscabiei	1223	2	56.16	no	MTGPMIPPALDKEIHHPTRLAVAAFLSGCAEAEFGVVRDYCGVSDSVMSKTVTALEKAGYVSVRKGYLGKRPRTWISLTLTGRQRLASHLAALEEIAGTARRAGAEGTAPDT	WP_060892878_2	4.20E-08
30821	WP_141720451	#00FF00	Streptomyces	Helix-turn-helix domain	PF12840.7	cc13	Streptomyces sp. SID4946	863	4	20.65	no	MSGKLHEQIHHPTRLAIVAFLSGCIEAEFKAVQECCGASAATLSKLVTALESAGYVRVRKGYLGRRPRTWLSLTPDGRKALEEHLAALNALVNTSVEQGRRHDTAATPDT	WP_141720451_4	9.80E-09
30823	WP_104258544	#00FF00	Rathayibacter	Helix-turn-helix domain	PF12840.7	cc13	Rathayibacter tritici	7276	3	17.29	yes	MQFDSVIHPEQRMRICAFLAPNDEVAFSIVRETLDMSESALSRQVKILVEAGYVSVTKESGVPRPRSWMALTDEGRRAIKGHLQALQQLAADAER	WP_104258544_3	1.90E-12
30825	WP_133890759	#00FF00	Streptomyces	Helix-turn-helix domain	PF12840.7	cc13	Streptomyces sp. BK208	3984	1	53.49	no	MTGEHSLDDAFRTANRLRMAAFLSGCDEAEFRAVQEYCGLSASNLSKNVSALDELGYLAVRKGHVGKVPRTWLALTDQGRKALLGHLAALQDIADSAARHA	WP_133890759_1	5.40E-05
30827	WP_079181075	#00FF00	Streptomyces	Helix-turn-helix domain	PF12840.7	cc13	Streptomyces sp. CB00316	3049	3	42.28	yes	MTEPRYDAVIHAPNRLRICAMLAAVDSMEFSRVRESLGVSDSVLSKHLKVLEGAGYVEVTKARGASYPRTWIALTRDGRRALAGHIAELRRIVGLADAPSGGEGETPPPD	WP_079181075_3	2.20E-14
30829	WP_015659226	#00FF00	Streptomyces	Helix-turn-helix domain	PF12840.7	cc13	Streptomyces davaonensis JCM 4913	1090	1	62.62	no	MSDPQVPPALDKEIHHPTRLTVAAFLSGCAEAEFSAVRDYCGVSDSVLSKTVTALEKAGYVSVRKGYFGKRPRTWLSLTFTGRRALAAHLAALEQIAGAARRAGAEGAPPEA	WP_015659226_1	5.10E-08
30831	WP_164312175	#00FF00	Streptomyces	Helix-turn-helix domain	PF12840.7	cc13	Streptomyces sp. SID12501	2185	1	45.24	no	MTDGLDEAFRSTTRLRIASFLSGCEEAEFRAVQEYCELTAPTLSKHAAALEATGYVEIRKGHVGKTPRTWLTLTEQGRSALAGHLAELQCIAATAARHGNSHRA	WP_164312175_1	3.30E-07
30833	WP_016570561	#00FF00	Streptomyces	Helix-turn-helix domain	PF12840.7	cc13	Streptomyces albulus	3792	3	32.74	no	MIDPAFDEVIHAPNRLRICTTLATVDAMEFSVVRDALMVSDSVLSKHVKVLQTASYVSVTKVRGSHPRTWLALTPEGRQALAGHIAELRHIVEMAQADQ	WP_016570561_3	5.90E-11
30835	WP_106115031	#00FF00	Actinopolyspora	Helix-turn-helix domain	PF12840.7	cc13	Actinopolyspora mortivallis	2225	2	35.79	yes	MIEAVFDEVIHPSNRLQICAMLAEGGSWEFATVRDELGLSDSVLSKQVKVLRESGYVTVTKSPRNPRSRTWLALTAEGRRALEGHLTVLRRMAERSSPARTRENEQ	WP_106115031_2	1.30E-11
30841	WP_052856102	#00FF00	Streptomyces	Helix-turn-helix domain	PF12840.7	cc13	Streptomyces kasugaensis	3784	1	52.87	no	MTDAAFDEVIHAPNRLRICTTLAAVDAMEFSVVRDALKVSDSVLSKHVKVLQAASYVTVTKVRGDSHPRTWLALTPEGRRALAGHITELRRIVEMAEAEG	WP_052856102_1	1.90E-12
30851	WP_071383933	#00FF00	Streptomyces	Helix-turn-helix domain	PF12840.7	cc13	Streptomyces monashensis	1098	4	38.05	no	MSGKLHEQIHHPTRLAIVAFLSGCMEAEFKAVQEYCGASAATLSKLVTALESAGYVQVRKGYFGRRPRTWLSLTPDGRKALQEHLAALNALVDTSVEQGRRHETAATAPDA	WP_071383933_4	8.80E-08
30859	WP_054237388	#00FF00	Actinobacteria	Bacterial regulatory protein, arsR family	PF01022.20	cc13	Actinobacteria bacterium OK006	1218	2	44.25	no	MTVPDTGSSLDPTIQHPTRLALVAFLSGCAEADFKTVRERLQMSDSALSKTVAALETAEYVSVRKGYVGKRPRTWLALTFDGRRRLAAHLMALQSIADQARAQAQD	WP_054237388_2	1.30E-05
30879	WP_133890759	#8000FF	Streptomyces	Homeodomain-like domain	PF13565.6	cc17	Streptomyces sp. BK208	6704	5	34.57	no	MSPQPVIPPQEKVRLVLDLLCKRLTLSQAAQQAGVSPQAVANWRRQFVTAGQDSLQPQARQTKEADRERQLRNEIVLLKAALGDAHLALRQQRSEFTRRPGLPGSFRPGPARGSLL	WP_133890759_5	0.029
30880	WP_053560627	#8000FF	Streptomyces	Transposase	PF01527.20	cc17	Streptomyces sp. CFMR 7	3	1	42.93	yes	MARPPALPPQDKARLVLAVLAKETTVSQAARQAQVSEQAIANWRRQFIQAGRLGLEGQAAVRTSHKEDLLSDEVRKLKLALGEAYIELLTWRRVGEARRVPLPTSS	WP_053560627_1	1.00E-10
30882	WP_128433866	#8000FF	Streptomyces	Homeodomain-like domain	PF13384.6	cc17	Streptomyces cyaneus	3	1	64.48	yes	MPRPPALPLQDKVRIVLSVLAKEKTVAEAARQAQVSEQSIANWRKQFIEGGSTGLAGPPAVRPTAHQEHLTDEVRRLKVALGEAYVELMAWRKIGDYRRVPSRTSR	WP_128433866_1	3.70E-09
30884	WP_136238412	#8000FF	Streptomyces	Transposase	PF01527.20	cc17	Streptomyces sp. Akac8	2	1	55.64	yes	MPRPPALPAREKTRLVLSVLAKECTVSEAARAARVSEQSIANWRRQFLEGGSAALAGRSAPSSTEQREAALVAEVHKLKQALGEAYVEVMAWRRTGDYRQVPSRSSKQYERN	WP_136238412_1	1.50E-10
30886	WP_051851944	#8000FF	Streptomyces	Homeodomain-like domain	PF13565.6	cc17	Streptomyces sp. NRRL F-5650	4	1	58.44	yes	MPRPPALPAEQKTRLVLAVLSKEHSVSEAARMARVSEQSIANWRRQFVEGGSVALAGRAPASPAGQREAALRKEVDRLKQALGEAYVELMACRRVGVPRHVPSGTSKQFARN	WP_051851944_1	0.018
30888	WP_109497443	#8000FF	Streptomyces	Transposase	PF01527.20	cc17	Streptomyces sp. Act143	3	4	31.69	yes	MPRPPALPAKDKTRLVLSVLAKECTVSEAARAAQVSEQSIANWRRQFIEGGSMALAGAAPPSGSQREAALTEEVHRLKQALGEAYVEVMAWRRTGDRPRVPSRTSKRSAPNWESPFRGTA	WP_109497443_4	1.10E-10
30894	WP_083744359	#8000FF	Microbispora	Homeodomain-like domain	PF13384.6	cc17	Microbispora rosea	24	1	74.08	yes	MPRPPALPADDKLAIVLAVLSGKHTVAEAARRAEVSEQSILNWRKQFIEGGRSGLEGALANRASEREADLAAEVKRLKTVLGEVYLELNTWRKIGHVRRVPTRTSR	WP_083744359_1	6.50E-10
30900	WP_060892878	#8000FF	Streptomyces	Transposase	PF01527.20	cc17	Streptomyces europaeiscabiei	16	6	19.83	yes	MDQETHEGPSVPLSSEEIADIVVGVIAGRESVAEAARRAQVSPRSVEAWRQVFLDGGLEALKGVGPRRPPTRESLLQREVDSLKEALGEVFLELDVWRDLDNVRRRHP	WP_060892878_6	3.30E-08
30902	WP_164312175	#8000FF	Streptomyces	Transposase	PF01527.20	cc17	Streptomyces sp. SID12501	6716	5	24.25	no	MPRVPVLPAEEKARIVLNLLSGRTTLSQAALQAGVSAQSVSVWRRQFIEAGHTGFQPLAQRSEAARRERRLLGEIQGLKAALGEAHLALRATASHRAYSLR	WP_164312175_5	5.80E-09
30903	WP_042407705	#8000FF	Streptacidiphilus	none	none	cc17	Streptacidiphilus carbonis	6396	1	4.78	no	MCRDHQCFHPMRRRASSSASWRAGARGLTQPPSQGGTARRERELLNEITRLRAALGEAHLALIVGRRKRKRP	WP_042407705_1	none
30914	WP_015659226	#8000FF	Streptomyces	Transposase	PF01527.20	cc17	Streptomyces davaonensis JCM 4913	3	5	28.55	yes	MSLAPEEIADLVVRVITARESVPEAARRAEVPVRSVELWRQLFLDGGLQALEGAGPRRPTPRESLLEKEVESLKEALGEVILELDVWRELRHVRHRCT	WP_015659226_5	7.30E-07
30918	WP_139627778	#8000FF	Nonomuraea	Homeodomain-like domain	PF13384.6	cc17	Nonomuraea sp. WYY166	0	1	45.35	yes	MPRPPAIPLQEKTRLVLAVLAKETTIAEAAKAAQVTEQSVINWRRQFVDGGCAGLAGGAADRRPEREEQLVNEIKRLKMALGEAYVEVMTWRKVGGARKVPSETSK	WP_139627778_1	1.40E-08
30926	GFH39519	#7FFFBF	Streptomyces	none	none	cc16	Streptomyces sp. CWH03	6015	2	6.96	yes	MSTRPYPEHIHLAPSRLTTWEYFMSTALWIAVGLALLIAVIAGIKKGRG	GFH39519_2	none
30927	WP_104779873	#7FFFBF	Streptomyces	Photosystem II reaction centre N protein (psbN)	PF02468.15	cc16	Streptomyces tibetensis	5869	2	4.57	yes	MSTALWIAVGIAVVVAVVAGIKKSRG	WP_104779873_2	3.40E-05
30929	WP_051727186	#7FFFBF	Streptomyces	none	none	cc16	Streptomyces albidoflavus	5709	2	12.87	yes	MVHFHPPLSPSLPEPSPAPPLSGKPTPGPPGHLTNEESLMSTVLWIAIGIALLVAVTAGIRKNRG	WP_051727186_2	none
30931	WP_097216730	#7FFFBF	Streptomyces	Photosystem II reaction centre N protein (psbN)	PF02468.15	cc16	Streptomyces sp. Ag82_G6-1	5888	1	18.17	yes	MSTALWIAIGIAVLVAVLAGIKKGRG	WP_097216730_1	2.60E-05
30933	WP_121750537	#7FFFBF	Streptomyces	none	none	cc16	Streptomyces sp. E2N166	5870	1	15.05	yes	MSTALWIAIGIALLVAVIAGIRKSRG	WP_121750537_1	none
30935	WP_141754588	#7FFFBF	Corynebacterium	Protein of unknown function (DUF2561)	PF10812.8	cc16	Corynebacterium sp. HMSC078H07	2048	2	15.38	no	MSTFVIIAVAAILIIAIPAGMMSRRIHKRTEDHDPEARQAALDFQRDVDRGRAGF	WP_141754588_2	1.00E-05
30936	WP_107501676	#7FFFBF	Streptomyces	Photosystem I protein M (PsaM)	PF07465.13	cc16	Streptomyces viridosporus	5895	2	14.69	yes	MSTALWIAVGIALVVAVVAGIKKSRG	WP_107501676_2	0.016
30938	WP_078077257	#7FFFBF	Streptomyces	none	none	cc16	Streptomyces niveus	5970	1	15.78	yes	MSTAVWIAIAIALLVAVVAGIKKNRS	WP_078077257_1	none
30940	WP_135072443	#7FFFBF	Streptomyces	none	none	cc16	Streptomyces sp. 4R-3d	5801	1	12.89	yes	MSTAVWIAIGIALLVAVFAGISKSRR	WP_135072443_1	none
30942	WP_055421432	#7FFFBF	Streptomyces	Protein of unknown function (DUF2897)	PF11446.8	cc16	Streptomyces pactum	5727	2	20.17	yes	MSTTLWIVIAIALVIAVIAGIKKSRG	WP_055421432_2	3.50E-05
30945	WP_052479947	#7FFFBF	Streptomyces	Protein of unknown function (DUF2897)	PF11446.8	cc16	Streptomyces sp. AVP053U2	5838	3	21.48	yes	MSTTLWIVIAIALAVAVIAGIKKSRG	WP_052479947_3	5.00E-06
30955	PIR21572	#7FFFBF	Deltaproteobacteria	Domain of unknown function (DUF4870)	PF09685.10	cc16	Deltaproteobacteria bacterium CG11_big_fil_rev_8_21_14_0_20_47_16	7264	1	30.92	no	MAETLTQQQKDDRMWGMLCHLSALLAVFGVPLLNVLGPLVVWLLKKNTSTFVDEQGKNSLNFQLTATIAFLICVPLVFIGIGIFLMIAVGIADLVFVIIASIKVNQGENYKYPYSLNLIK	PIR21572_1	8.80E-42
30991	WP_044377254	#FFC0CB	Streptomyces	none	none	cc15	Streptomyces badius	7754	2	27.75	yes	MARVATDAAPAGIAVLRLIGMLPAEWECGQRIEDDRITVLVRGSGRDAGDVTGVRERCAEALRDRTLDGWVLEGAG	WP_044377254_2	none
30992	WP_096622718	#FFC0CB	Streptomyces	none	none	cc15	Streptomyces sp. WZ.A104	7753	2	40.21	yes	MEITVVRASTDAAPAGTAVLRLIGMLPAHWDCGQHIEEDRITVLVRGGVRDARERCAEALRDRALEGWVLEGSG	WP_096622718_2	none
30994	WP_018960901	#FFC0CB	Streptomyces	none	none	cc15	Streptomyces sp. CNB091	7853	3	27.54	yes	MVRVAAHAAPAGTAVLRLLGMLPAHWECAQRIEEDRITVLVRGGGGQEVRERCAEALRGRTLEGWTLEGRQAL	WP_018960901_3	none
30996	WP_107115831	#FFC0CB	Streptomyces	none	none	cc15	Streptomyces globisporus C-1027	7655	4	29.9	yes	MARVSADATPAGIAVLRLIGMLPAQWECGQRIDEDRITVLVRGSGRDAGDVTAVRERCAEALRDRTLHGWVLEGAG	WP_107115831_4	none
30998	WP_124271963	#FFC0CB	Streptomyces	none	none	cc15	Streptomyces sp. ADI96-02	7673	3	38.32	yes	MVRAAVTAAPAGIAVLRLIGMLPAHWVCGQRIEEDRITLRVRGGDGPEVRGRCGAVLRDRALEGWALETPEPADRPPPGDRAAGTGAGAGDGAEDGAGGEPAEP	WP_124271963_3	none
31000	WP_126393842	#FFC0CB	Streptomyces	none	none	cc15	Streptomyces sp. MK-45	7826	3	10.21	yes	MAVNGVDEAVEFQDLVLVRKAGGDAPAATAVIRVLGTLPEGWGHEWRLDEDGGRIHLRIRPPSGSGPGVVRGWLGGVLEDPALWAWGVEGAEPGG	WP_126393842_3	none
31001	WP_031017311	#FFC0CB	Streptomyces	none	none	cc15	Streptomyces sp. NRRL WC-3795	7455	4	25.4	yes	MTQTEFQDLVLVCRRPGTAPAATAVVRLLGKLPGEWERSWRLDETGGRIRLRIRPPAGSPPAAVRAWADGALQDPALRAWCAEESGAT	WP_031017311_4	none
31004	WP_120754718	#FFC0CB	Streptomyces	none	none	cc15	Streptomyces klenkii	7435	5	26.96	yes	MARTEFTEAVVERAAPTAAPPETAVVRLVSALPEGWDCTWRLEEDRIRLRVEPAGPAGLAAVHEWLAGVLVDGGVLRGWRRGR	WP_120754718_5	none
31005	WP_141310912	#FFC0CB	Streptomyces	none	none	cc15	Streptomyces spinoverrucosus	7624	3	34.94	yes	MTDTEFQDLVLVRRPPGTAPAATALVRILGKLPEGWDRSWRLDEDGGRIQLRIRPPAGSPSTAVRTWLTEALGDPALRAWGAEETG	WP_141310912_3	none
31008	WP_058047489	#FFC0CB	Streptomyces	none	none	cc15	Streptomyces sp. MBT76	7600	3	33.98	yes	MARTEFTEAVVARAAPTAAPPETAVIRLVGALPAGWDCNWRLREDGILLRVQPAAGAGPGAVAQWLAGVLDAGGLRGWRAVR	WP_058047489_3	none
31011	WP_051840194	#FFC0CB	Streptomyces	none	none	cc15	Streptomyces lavendulae subsp. lavendulae	7439	4	38.84	yes	MRERHLYEVALVRAGPEAAAAETTVVRLVGLLPPHWTCAQRLDADGITLVVSAAAGGAGPDDGNAVRKWLARVLGEDSLRGWRAAGP	WP_051840194_4	none
31017	WP_097866484	#FFC0CB	Streptomyces	Protein of unknown function (DUF2486)	PF10667.9	cc15	Streptomyces sp. rh34	7486	4	35.07	yes	MVVRAAVPAAPAGTAVLRLLGMLPAHWECAQRIEEDRITVLVRGGGRQDVRERCAEALKDRTLEGWTLEDGRRVP	WP_097866484_4	3.60E-06
31035	WP_091465037	#B25900	Paenarthrobacter	none	none	cc18	Paenarthrobacter nitroguajacolicus	1117	3	19.58	yes	MSDNKRNQSLATKKLIRNIALLLVGILAAYAVTTLLL	WP_091465037_3	none
31036	WP_062071413	#B25900	Arthrobacter	none	none	cc18	Arthrobacter sp. EpRS71	1117	3	16.95	yes	MPDNKRNQSLATKKLVRNIALLLIGVLAAYAVTTLLL	WP_062071413_3	none
31038	AFR27446	#B25900	Arthrobacter	none	none	cc18	Arthrobacter sp. Rue61a	1117	3	16.47	yes	MPDNKRNQSLATKKLVRNIALLLIGILAAYAVTTLLL	AFR27446_3	none
31040	WP_061955677	#B25900	Arthrobacter	none	none	cc18	Arthrobacter sp. EpRS66	1138	5	12.29	yes	MPETNTAQNSPSKSPKLKKHLRNLALLLIGIAVAYAITTFLA	WP_061955677_5	none
31043	WP_104291723	#B25900	Rathayibacter	none	none	cc18	Rathayibacter sp. AY1A2	1153	5	25.85	yes	MTTSRTASTRPSPLKKLLVNTALLVGGAGGAYLVVTYLF	WP_104291723_5	none
31046	WP_168688294	#B25900	Leifsonia	none	none	cc18	Leifsonia sp. PS1209	1132	1	25.9	yes	MSDSDTRRPSSSKKLLKNILLLAGGILVAYLVTTYLF	WP_168688294_1	none
31052	WP_096285992	#B25900	Arthrobacter	Rad51	PF08423.11	cc18	Arthrobacter sp. MYb216	1231	4	21.46	yes	MTDNDNHQDLAKKPSNIRKQLRNLALLALGVAIAYVVTNFLR	WP_096285992_4	1.60E-05
31058	WP_142936832	#B25900	Arthrobacter	none	none	cc18	Arthrobacter sp. TS-15	1118	3	20.62	yes	MSDNKRNQSLATKKLLRNVALLLIGVLAAYAVTALLL	WP_142936832_3	none
31065	WP_141366901	#B25900	Glutamicibacter	Domain of unknown function (DUF3332)	PF11810.8	cc18	Glutamicibacter uratoxydans	1170	2	15.77	yes	MNNELNHQNQEAKTAATKKYLRSAIMLILGIAAAYVVTTFLL	WP_141366901_2	2.60E-06
31068	WP_131089594	#B25900	Arthrobacter	none	none	cc18	Arthrobacter sp. S41	1137	5	12.75	yes	MTENNTAQNSPSKSSKLKKHLRNLGLLLLGIAVAYAITTFLA	WP_131089594_5	none
31075	WP_166841243	#B25900	Paenarthrobacter	none	none	cc18	Paenarthrobacter sp. MSM-2-10-13	1117	3	21.36	yes	MSDNKRNQSLATKKLLRNVALLLIGVLAAYAVTALLL	WP_166841243_3	none
31092	PZN45587	#800000	Actinobacteria	RNA polymerase Rpb2, domain 4	PF04566.13	cc20	Actinobacteria bacterium	38	2	31.17	yes	MADEAAERSLDMQTLMAELRRSMADVKGIDEFLGAGAAFINGEEQDIDLTVERMMSFFNGEIGGYSEERQRLVVLAQTMRRRVGGVPVLLLTFTTCTEVLSCSYACC	PZN45587_2	1.60E-05
31093	WP_131969051	#800000	Actinomadura	none	none	cc20	Actinomadura sp. KC06	10	1	48.06	yes	MENEKNTPAAGEKEERSDLAALMTQLAQSMAAVRGFDDFVGAGTAFIKGEEDDIDTTVEQMMSFFNGEIGGYSTERQRLIQIAQSMRKEAGGVAIFMLTFTTCSAALSCSYACC	WP_131969051_1	none
31095	WP_062348671	#800000	Herbidospora	none	none	cc20	Herbidospora yilanensis	14	1	74.92	yes	MDDAEQAKPPYDVTALLVELQRSWATVPGIDDFVGSGAAFVKGEEPDLEKTVDRMMSFFNGEIGGYSTERQRLVLLAQNMRKRAGGVPIVLLTFTTCTEVLSCSYACC	WP_062348671_1	none
31097	WP_030452416	#800000	Herbidospora	none	none	cc20	Herbidospora cretacea	14	1	76.47	yes	MDDAEQPKPPYDVTALLVELQRSWATVPGIDDFVGSGAAFVKGEEPDLEKTVDRMMSFFNGEIGGYSTERQRLVLLAQNMRKRAGGVPIVLLTFTTCTEVLSCSYACC	WP_030452416_1	none
31099	WP_062437448	#800000	Herbidospora	none	none	cc20	Herbidospora daliensis	10	1	74.19	yes	MDAEPPPRPQYDLNALLVELERSWSTVPGIDDFVGSGAAFVKGEEADLEKTVDRMMSFFNGEIGGYSTERQRLVLLAQNMRKRAGGVPIVLLTFTTCTEVLSCSYACC	WP_062437448_1	none
31101	WP_145982885	#800000	Pseudonocardia	none	none	cc20	Pseudonocardia sp. EC080625-04	3	1	58.6	yes	MTESAKPKFDTFTLARLREETATIPGIERFVSSARGFVYGDVSLDDATSQMMEFFDGDLIGGSDERQRLVELAKQLNPRYGTVSVMILTFMTCSPVLSCAGSCSE	WP_145982885_1	none
31103	WP_161483240	#800000	Herbidospora	none	none	cc20	Herbidospora sp. NEAU-GS84	14	1	70.61	yes	MDDAEQPKPPYDVTALLVELQRSWATVPGIDDFVGSGAAFVKGEEPDLEKTVDRMMSFFNGEIGGYSTERQRLVLLAQNMRKRAGGVPIVLLTFTTCTEVLSCSYACC	WP_161483240_1	none
31114	CNF13542	#800000	Mycobacterium	none	none	cc20	Mycobacterium tuberculosis	50	4	44.15	yes	MAAEDNQGRRADLAALMTQLEESMADVRGIDDFVGAGAAFIKGEEQDIEATVDQMMSFFNGEIGGHSTERQRLIQIAQCMRREAGGVAIFMLTFTTCSAALSCSYACC	CNF13542_4	none
31122	WP_137248807	#800000	Herbidospora	none	none	cc20	Herbidospora galbida	10	1	72.07	yes	MDAEPPRPQYDVTALLEELQRSWATVPGIDDFVGSGAAFVKGEEADLEKTVDRMMSFFNGEVGGYSTERQRLVLLAQNMRKRAGGVPIVLLTFTTCTEVLSCSYACC	WP_137248807_1	none
31135	WP_148763415	#592C00	Dolichospermum	none	none	cc19	Dolichospermum sp. UHCC 0315A	2163	6	27.58	yes	MRITISELELRLAEPILDQLTPWEMKTLKGGYVMRKDRRNPPTTNITNTTDLSTVFKELDSSMERWKISLKDTTDSLRSKFDF	WP_148763415_6	none
31136	OBQ36138	#592C00	Anabaena	none	none	cc19	Anabaena sp. CRKS33	2305	2	23.72	yes	MKIIISELGKRIPEPILDELTPWEMKNINGGYMTRRQMARYNMTNSNNTTTNTNDFSTMIKEINSSIAEWKITLQDTTDSLGVNFTF	OBQ36138_2	none
31138	OBQ18754	#592C00	Anabaena	none	none	cc19	Anabaena sp. WA113	2126	4	19.77	yes	MRITISELELRISEAILDELTPWEMKTLKGGYVMRKDRRNPPTTNITNTTDLSTVFKELDSSMERWKISLKDTTDSLRSKFDF	OBQ18754_4	none
31139	WP_168357543	#592C00	Dolichospermum	none	none	cc19	Dolichospermum planctonicum UHCC 0167	2436	3	27.19	yes	MKIIVSELGTTISEAILDELTPWEMKNINGGYMTRRDMERYNMTNSNNTTNTTDFSTMLKEINSSIAKWKITLQDTTDSLGINFNF	WP_168357543_3	none
31142	WP_137906310	#592C00	Dolichospermum	Inhibitor of glucose uptake transporter SgrT	PF15894.5	cc19	Dolichospermum planctonicum	2405	4	21.21	yes	MKIIISELGKKIPEPILDELTLWEMKNINGGYMTRRDMARYNMTNSNNTTNTNDFSTMLKEINSSIAQWKITLEDTTDTLGINFNF	WP_137906310_4	0.00028
31147	WP_168645325	#592C00	Dolichospermum	Phage Terminase	PF03354.15	cc19	Dolichospermum sp. UHCC 0259	2356	6	18.69	yes	MKITISELKLRISEPILDELTPWEMKTLKGGYTMRKDRINPPITTNTTDLSTLLKELDSSMEQWKISLKDTTDSLINRLDF	WP_168645325_6	5.50E-06
31153	WP_096664869	#592C00	Dolichospermum	none	none	cc19	Dolichospermum compactum NIES-806	2286	7	20.94	yes	MKITISELELRISEPILDELTPWEMKTLKGGYTMRKDRRNPPITTNTTDLSTLLKELDSSMEQWKISLKDTTDSLINKFDF	WP_096664869_7	none
31160	WP_168465654	#592C00	Aphanizomenon	none	none	cc19	Aphanizomenon sp. UHCC 0183	2172	6	22.18	yes	MKITISELELRISEPILDELTPWEMKTLKGGYVMRKDRINPPITTNTTDISTLLKELDSSMEQWKISLKDTTDSLINRFDF	WP_168465654_6	none
31168	WP_015078657	#592C00	Anabaena	none	none	cc19	Anabaena sp. 90	2163	9	28.65	yes	MRITISELEIRLAEPILDQLTPWEMKTLKGGYVMRKDRINPPTTNITNTTDLSTVFKELDSSMEKWKISLKDTTDSLRSKFDF	WP_015078657_9	none
31180	WP_153321593	#0080FF	Nocardioides	Homeodomain-like domain	PF13384.6	cc21	Nocardioides sp. dk4132	6339	2	33.15	yes	MVRRTRSGDDAPRIYNRVRVVRAELGISRAELAASVGVNPQTIGALERGDHYPSLNLAMSICEVFDVPIEAVFSRQPFPSVAAGYKRERPADPDREEQG	WP_153321593_2	3.60E-05
31181	WP_122818055	#0080FF	Nocardioides	Homeodomain-like domain	PF13384.6	cc21	Nocardioides sp. 603	6530	3	39.72	yes	MARRARQDEVRRIHNRVAVLRAETKLSRAQLAERVGVNPQTIGALERGEHYPSLQLAMSICEVFGVPIEAVFSREPFPSVTATYRRPDPQEDPS	WP_122818055_3	8.10E-06
31183	WP_084520237	#0080FF	Nocardia	Replication protein A C terminal	PF08784.11	cc21	Nocardia mexicana	4637	3	18.76	yes	MYNLLREIRTAQGVSRAELAEAVEVNVQTIGALERGQYSPSLYLALMICEALDTQLDQVFGLAD	WP_084520237_3	8.10E-05
31185	WP_115965582	#0080FF	Rhodococcus	C-terminal domain of bromodomain protein 4	PF17105.5	cc21	Rhodococcus sp. OK269	1683	1	41.42	yes	MPVAGDARRPMYNNLRRFRAQAKVSRAELAATIDVNVQTIGALERGSYSPSLYLALLIADALDVPLIDLFGLADTVENHRTGTH	WP_115965582_1	6.00E-06
31187	WP_068028504	#0080FF	Nocardia	Replication protein A C terminal	PF08784.11	cc21	Nocardia mexicana	1744	3	18.76	yes	MYNLLREIRTAQGVSRAELAEAVEVNVQTIGALERGQYSPSLYLALMICEALDTQLDQVFGLAD	WP_068028504_3	8.10E-05
31189	WP_008380405	#0080FF	Gordonia	Helix-turn-helix	PF01381.22	cc21	Gordonia malaquae NBRC 108250	4560	3	22.24	no	MSRAELARRIDVNVQSVGSIERGDYYPSLDLAMRICEVFDLPVEAVFSRTEFAPLSAQVYRG	WP_008380405_3	7.20E-13
31197	WP_092602219	#0080FF	Actinopolyspora	Helix-turn-helix	PF01381.22	cc21	Actinopolyspora xinjiangensis	6700	1	26.8	yes	MSRAALAEHVGVNRQTIGALERGDHYPSLLLAMSICDVFGLPIEAVFSREPFQSITAAYGRPDTGATRGDQV	WP_092602219_1	7.20E-12
31203	WP_155862233	#0080FF	Corynebacterium	Protein of unknown function (DUF5133)	PF17196.4	cc21	Corynebacterium durum F0235	3555	6	13.52	yes	MDATLIAKPTNLVRKLRRWRELSQAELAERAHVSRQTIVNVEKGSYSPSVYLALAICRELGATVEEVFGDEQSMEVVKGETS	WP_155862233_6	0.00012
31209	KQB97104	#FF4040	Loktanella	none	none	cc22	Loktanella sp. 1ANDIMAR09	1108	1	25.53	yes	MCVKVGFTAGCTFGDVAEATKAAAAAAPVGASADCVSVAFTAGCTFSDIAEAQAAAKPHLDAFGSTELGCGNVLFTAVCSV	KQB97104_1	none
31210	WP_110278359	#FF4040	Loktanella	Anemonia sulcata toxin III family	PF08098.11	cc22	Loktanella sp. PT4BL	1127	1	24.91	yes	MCIKVGFTAGCTFGDVAEATKAATAAAPVAASDDCVSIAFTAGCTFGDIAEAQAAAKPHLDAFGSTQLGCGSVLFTAVCSV	WP_110278359_1	0.0023
31212	WP_106358260	#FF4040	Yoonia	Anemonia sulcata toxin III family	PF08098.11	cc22	Yoonia maritima	1156	1	14.75	yes	MCVSVAFTAGCTFGDVEEATKAAAANPVQVTEGCVSVLFTAGCSFGDVAEAQAAAQKHMDALGASKLGCVSTAWTAVCTV	WP_106358260_1	0.0022
31214	WP_162197196	#FF4040	Loktanella	none	none	cc22	Loktanella sp. S4079	1134	2	13.02	yes	MCVSVAFTAGCTFSSVEEATKAAAEKPVEVSEGCVSVLFTAGCSFGDVKEAQAAAQQHMDALGASKLGCVSTAWTAVCTV	WP_162197196_2	none
31216	WP_106743417	#FF4040	Yoonia	Anemonia sulcata toxin III family	PF08098.11	cc22	Yoonia maritima	1156	1	19.69	yes	MCVSVAFTAGCTFGDVEEATKAAAANPVQVTEGCVSVLFTAGCSFGDVAEAQAAAQKHMDALGASKLGCVSTAWTAVCTV	WP_106743417_1	0.0022
31218	WP_055189764	#FF4040	Aliiroseovarius	none	none	cc22	Aliiroseovarius crassostreae	1154	1	17.51	yes	MCVSVAFTAGCTFSDVAEATKAASNAQLSASENCVSVLFTAGCSFKSIEEAQAAAQPHLDAMAEAAGNCGKVMFTAVCSV	WP_055189764_1	none
31220	WP_107498105	#FF4040	Thalassobius	Anemonia sulcata toxin III family	PF08098.11	cc22	Thalassobius sp. I31.1	1152	3	19.48	yes	MCVSVAFTAGCTFGSIEEASKAAAANPVTVADNCVSVLFTAGCSFGTVAEAQAAAQPHLDAIAASADNCGNVLFTAVCTV	WP_107498105_3	0.0026
31237	WP_053706403	#40FF40	Streptomyces	none	none	cc23	Streptomyces sp. WM6373	443	4	13.24	no	MRRAREGPRTPHRVVPEGDQQPSSTVFETTWPLIQLMLADTAAQPQVVAGASEAADRLISSTELYAS	WP_053706403_4	none
31238	WP_051708270	#40FF40	Micromonospora	none	none	cc23	Micromonospora parva	406	3	2.86	no	MVFETTWPLIQLTPALTMAQPGVVAGASETAERSMSSAVL	WP_051708270_3	none
31240	WP_157846946	#40FF40	Streptomyces	Protein of unknown function (DUF459)	PF04311.13	cc23	Streptomyces achromogenes subsp. achromogenes	362	3	5.32	no	MPVIAGPAHARLTWDGSDQQPSSYVLETAWPVSQLAPAVAAQTSVVAGASDAADRLISSTVLYVS	WP_157846946_3	6.60E-06
31242	WP_153461219	#40FF40	Streptomyces	none	none	cc23	Streptomyces kaniharaensis	3918	7	20.04	yes	MGPRLVVPEGPACCGPLLRERLAQQPQLTVPAIEPPMALPTAAPQAAVETAMTLSAGVVAGASAVAPAPTSSASV	WP_153461219_7	none
31244	WP_153461219	#40FF40	Streptomyces	none	none	cc23	Streptomyces kaniharaensis	3624	5	28.79	yes	MEPRLVVPEGPACCGPLLRERLAQQPQLAVAPTAPLTTLTVKAPHSGEEAVTIVGVVAGASAEALAPTSWASV	WP_153461219_5	none
31247	WP_071383933	#40FF40	Streptomyces	none	none	cc23	Streptomyces monashensis	799	7	8.35	no	MVAPQAADDMSIDTRIDGVVAGASPSAVTPNSSAEV	WP_071383933_7	none
31249	WP_054237388	#40FF40	Actinobacteria	none	none	cc23	Actinobacteria bacterium OK006	797	8	13.1	no	MVPAPSGSGPTTTRRGCRIPGGSPHVPYESGQQPAPCVMETLVRIPLAAEIENAPHSGDDAVMIDGVVAGASPAAEAPKSAASV	WP_054237388_8	none
31251	WP_096664869	#004040	Dolichospermum	Predicted membrane protein (DUF2207)	PF09972.9	cc25	Dolichospermum compactum NIES-806	4032	4	34.41	no	MYDSDKRKLLSALCHGAIFFSTTIVSIGLPIAILFVSDDPVVKDNAKESINFHFNVWLYGSILGALFFLIGWLIVPLFILFPLAGLGYILHWGLTIWALIGVFSNPDQPCRYPFIFRVL	WP_096664869_4	0.00086
31252	WP_148763415	#004040	Dolichospermum	Predicted membrane protein (DUF2207)	PF09972.9	cc25	Dolichospermum sp. UHCC 0315A	3914	1	39.55	no	MYDSDKRKLLSALCHGAIFFSTTIVSVGLPIAILFVSDDPVVKENAKESINFHFNVWLYGAILGALFFLFGWLILPLFILFPLAGLGYILHWGLTIWALIGVFSDPNQPCRYPFIFRVF	WP_148763415_1	0.00086
31254	WP_027402982	#004040	Aphanizomenon	Predicted membrane protein (DUF2207)	PF09972.9	cc25	Aphanizomenon flos-aquae NIES-81	4658	3	36.62	no	MYDSDKRKLLSALCHGAIFFSTTIVSIGLPIAILFVSDDPVVKDNAKESINFHFNVWLYGTILGALFFLIGWLIVPLFILFPLAGLGYILHWGLTIWALTGVFSNPNQPCRYPFIFRVL	WP_027402982_3	0.00048
31257	WP_168465654	#004040	Aphanizomenon	Predicted membrane protein (DUF2207)	PF09972.9	cc25	Aphanizomenon sp. UHCC 0183	4099	2	37.69	no	MYDSDKRKLLSALCHGAIFFSTTIVSIGLPIAILFVSDDPVVKDNAKESINFHFNVWLYGAILGALFFLFGWLILPLFILFPLAGLGYILHWGLTIWALIGVFSDPNQPCRYPFIFRVL	WP_168465654_2	0.00091
31261	WP_015078657	#004040	Anabaena	Predicted membrane protein (DUF2207)	PF09972.9	cc25	Anabaena sp. 90	3915	3	38.67	no	MYDSDKRKLLSALCHGAIFFSTTIVSVGLPIAILFVSDDPVVKENAKESINFHFNVWLYGAILGALFFLFGWLILPLFILFPLAGLGYILHWGLTIWALIGVFSDPNQPCRYPFIFRVF	WP_015078657_3	0.00086
31266	OBQ18754	#004040	Anabaena	Predicted membrane protein (DUF2207)	PF09972.9	cc25	Anabaena sp. WA113	3844	1	42.32	no	MYDNDKRKLLSALCHGAIFFSTTMVSIGLPVAILFVSDDPVVKDNAKESINFHFNVWLYGAILGALFFLTGWLIIPLFFLLPLAGLGYIIHWGLTIWALIGVFSNPNQPCRYPFIFRVF	OBQ18754_1	0.00049
31272	WP_168645325	#004040	Dolichospermum	Predicted membrane protein (DUF2207)	PF09972.9	cc25	Dolichospermum sp. UHCC 0259	4101	3	33.53	no	MYDSDKRKLLSALCHGAIFFSTTIVSIGLPIAILFVSDDPVVKDNAKESINFHFNVWLYGAILGALFFLIGWLVLPLIILLPLAGLGYILHWGLTIWALIGVFSNPNQPCRYPFIFRVL	WP_168645325_3	0.00049
31279	WP_135072443	#4040FF	Streptomyces	Bacterial regulatory protein, Fis family	PF02954.19	cc24	Streptomyces sp. 4R-3d	1510	2	8.91	yes	MAQVARRMGMSDRTLRRKLRTICERVDVETPIEAVVWAVRRRIV	WP_135072443_2	3.50E-07
31280	WP_055421432	#4040FF	Streptomyces	none	none	cc24	Streptomyces pactum	1341	3	4.62	yes	MEMSDRTLRRKVRSICDRVDVETPIEAVVWAVRRRII	WP_055421432_3	none
31282	WP_121750537	#4040FF	Streptomyces	Bacterial regulatory protein, Fis family	PF02954.19	cc24	Streptomyces sp. E2N166	1300	3	-3.32	yes	MSQVARRMEMSDRTLRRKIRSICDRVDVETPIEAVVWAVRRRII	WP_121750537_3	5.00E-06
31284	WP_104779873	#4040FF	Streptomyces	Helix-turn-helix domain of resolvase	PF02796.15	cc24	Streptomyces tibetensis	1353	1	6.48	yes	MTLNSSLREPHLRLGNDHLRILQLVSQGCTMTQVARRMEMSDRTLRRKLRSICDCVDVETPIEAVVWAVRRRII	WP_104779873_1	9.20E-07
31286	WP_052479947	#4040FF	Streptomyces	Bacterial regulatory protein, Fis family	PF02954.19	cc24	Streptomyces sp. AVP053U2	1332	4	13.15	yes	MTQVARRMEMSDRTLRRKVRSICDRVDVETPIEAVVWAVRRRII	WP_052479947_4	1.40E-05
31288	WP_078077257	#4040FF	Streptomyces	Bacterial regulatory protein, Fis family	PF02954.19	cc24	Streptomyces niveus	1716	2	2.29	yes	MAQVARRMGMSDRTLRRKLRTICERVDVETPIEAVVWAVRRRIV	WP_078077257_2	3.50E-07
31292	WP_097216730	#4040FF	Streptomyces	Mga helix-turn-helix domain	PF05043.13	cc24	Streptomyces sp. Ag82_G6-1	1354	2	4.89	yes	MTLNSSLREPHLIFGNDHLRILQLISQGCTMTQVARRMEMSDRTLRRKLRSICERVDVETPIEAVVWAVRRRVI	WP_097216730_2	6.20E-05
31307	WP_096664869	#408040	Dolichospermum	LemA family	PF04011.12	cc29	Dolichospermum compactum NIES-806	7706	3	36.72	yes	MVSINEVINGKKTIEAAILEAITEARTTCTENGNNSPNCAVAWDIVEELQAEKAHQKQAKHRKTALEDYCEMYPDALECLIYDL	WP_096664869_3	2.20E-06
31308	WP_099068319	#408040	Nostoc	Protein of unknown function (DUF1397)	PF07165.11	cc29	Nostoc linckia z15	7987	1	34.3	no	MTNIQETATNGIQEQIQKEVEQARSVCDINGSNSPECAAAWDAVEELQAEASHQRQNKPKNSLEQYCDDNPEAIECRVYDD	WP_099068319_1	2.30E-06
31310	WP_096537472	#408040	Nostoc	Protein of unknown function (DUF1397)	PF07165.11	cc29	Nostoc linckia NIES-25	7243	1	31.33	no	MTNIQETAKNGIQEQIQQEVEQARTVCDINGSNSPECAAAWDAVEELQAEASHQRQSKPKNSLEQYCDDNPEAIECRVYDD	WP_096537472_1	2.80E-06
31312	BAZ33272	#408040	Cylindrospermum	KH domain	PF00013.29	cc29	Cylindrospermum sp. NIES-4074	6449	3	26.3	no	MTNIQEKTSTDIQEKIQEEVEQARTVCDITGSNSAECAAAWDAVEELQAEASHQRQNKPKNSLEQYCDDNPEAIECRLYED	BAZ33272_3	1.40E-05
31314	WP_138498533	#408040	Nostoc	CP12 domain	PF02672.15	cc29	Nostoc sp. PA-18-2419	6384	5	32.5	no	MTNIQGTAKGDIQQKIQQEVEEARTVCDTSGDTSPECAAAWDAVEELRAEASHQRQIKPKNSFEQYCDDNPDAIECRVYDD	WP_138498533_5	1.10E-36
31316	WP_073643028	#408040	Nostoc	Protein of unknown function (DUF1397)	PF07165.11	cc29	Nostoc calcicola FACHB-389	7091	2	32.6	no	MTNIQETAKGDIQEKIQEEVEQARTVCDINGSNSPECAAAWDAVEELQAEASHQRQSKPKNSFEQYCDDNPDAIECRVYDD	WP_073643028_2	5.70E-07
31328	WP_139627778	#404000	Nonomuraea	LPXTG cell wall anchor motif	PF00746.21	cc27	Nonomuraea sp. WYY166	5501	3	35.19	yes	MAEIFIAAATMVLGGGAAAAVNKRQKKKREAFTAQFGSFEEFRRAADPDRIRAIRDDRGELVAVKVVRQEYPGIPLEYATRFVKQL	WP_139627778_3	6.50E-06
31329	WP_128433866	#404000	Streptomyces	Dynein attachment factor N-terminus	PF15867.5	cc27	Streptomyces cyaneus	5621	3	44.1	yes	MFGWQKRKQEFKERYPSYDDFRRAVDESRIRRVKQQDGDVKAIKVLRDDFPGAPLELATRYVREL	WP_128433866_3	4.70E-06
31331	WP_051851944	#404000	Streptomyces	Chloramphenicol resistance gene leader peptide	PF08077.11	cc27	Streptomyces sp. NRRL F-5650	5589	2	53.31	yes	MIEGIAGAVALGVTGALGVATDRTANKRKKAFKERYGTFEGFRSQVDEEKIQRVRREKGNVSAIKVVRENYPYVSLAFAKRYVEELPS	WP_051851944_2	9.50E-05
31333	WP_053560627	#404000	Streptomyces	Protein of unknown function (DUF2749)	PF10907.8	cc27	Streptomyces sp. CFMR 7	5793	2	41.96	yes	MLVAVAAGVAVGASAVVAVVIGRRNRNTRDDFVKQFRTQEEFRKAVAADGDRIRSIRETQSEMAAIKAVRDEFPGAPLQQVIQVVRAL	WP_053560627_2	0.00024
31335	WP_109497443	#404000	Streptomyces	Ribosomal protein L7/L12 C-terminal domain	PF00542.19	cc27	Streptomyces sp. Act143	5713	1	70.61	yes	MIENISGAIAVGISTILGVAGENTSKKRAQAFTKRYGSYEGFRQQVDEDRVQGVLRTRGKVAAIKEVRDNYPYVSLPMAKRYVEQLPA	WP_109497443_1	8.00E-06
31338	WP_136238412	#404000	Streptomyces	PE family	PF00934.20	cc27	Streptomyces sp. Akac8	5625	2	54.99	yes	MVEGVAGAVAVGITTVLGVASDRTSKKRAQAFTRQYGSYEGFRQQVDEAHVQEVRRTRGDVAAIKAVRDAHPTVSLRLAKRYVEQLPAA	WP_136238412_2	6.20E-07
31342	WP_168465654	#404080	Aphanizomenon	HicB_like antitoxin of bacterial toxin-antitoxin system	PF15919.5	cc30	Aphanizomenon sp. UHCC 0183	5963	5	24.65	yes	MKYTIIIQWSNEDKCYVVSLPDFTDIMQPCTHGDTYEEALKNAQEVL	WP_168465654_5	3.00E-09
31343	WP_168645325	#404080	Dolichospermum	HicB_like antitoxin of bacterial toxin-antitoxin system	PF15919.5	cc30	Dolichospermum sp. UHCC 0259	7608	2	38.77	yes	MNNHYTIIIQWSEEDNCFVVSLPEWGEFCHTHGDTYEEALKNAQEVLEMLISSYLEDGQPIPEPQILGKSLTAA	WP_168645325_2	2.90E-14
31345	WP_015078657	#404080	Anabaena	Glucan-binding protein C	PF08363.10	cc30	Anabaena sp. 90	7451	5	33.85	yes	MPKKIRELKYTIVIQWSNEDKCYVVSLPDFTDIMQPCTHGDTYEEALKNAQEVLEMLISSYLEDGQPIPEPQIIGIN	WP_015078657_5	1.10E-05
31348	WP_027402982	#404080	Aphanizomenon	HicB_like antitoxin of bacterial toxin-antitoxin system	PF15919.5	cc30	Aphanizomenon flos-aquae NIES-81	5830	1	43.2	yes	MKYTIIIQWSKEDECYVVSLPDFTDVMQPCTHGDTYEEALKNAQEVLEMLISSYLEDGQPIPEPQIIGIN	WP_027402982_1	2.20E-14
31352	WP_148763415	#404080	Dolichospermum	HicB_like antitoxin of bacterial toxin-antitoxin system	PF15919.5	cc30	Dolichospermum sp. UHCC 0315A	6341	3	39.24	yes	MNNHYTIIIQWSEEDKCFVVSLPEWGEFCHTHGDTYEEALKNAQEVLEMLISSYLEDGQPIPEPQIIGKSLTAA	WP_148763415_3	1.60E-14
31357	WP_096664869	#404080	Dolichospermum	HicB_like antitoxin of bacterial toxin-antitoxin system	PF15919.5	cc30	Dolichospermum compactum NIES-806	5642	6	26.4	yes	MPKKIRELKYTIVIQWSNEDKCYVVSLPDFTDIMQPCTHGDTYEEALKNAQEVLEMLISSYLED	WP_096664869_6	7.60E-11
31363	WP_148763415	#FF69B4	Dolichospermum	none	none	cc26	Dolichospermum sp. UHCC 0315A	3955	7	7.78	yes	MNNGKINQPNRKNNAPRIAPYNQTLKWKLIDSLAFSLTTGSSDTNSMAMGKPTETIVVLKKIAP	WP_148763415_7	none
31364	WP_168645325	#FF69B4	Dolichospermum	none	none	cc26	Dolichospermum sp. UHCC 0259	4142	7	8.53	yes	MIRGKTNQPIRKNNAPRIAPYNQTLKWKFIDSLALSLTTGSSDTNSMAMGNPMETMVVLKKIAP	WP_168645325_7	none
31366	WP_027402982	#FF69B4	Aphanizomenon	none	none	cc26	Aphanizomenon flos-aquae NIES-81	4699	9	7.58	yes	MNNGTINQPIRKNNAPRIVPYNQTLKWKLIDSLALSLTTGSSDTNSMAIGNPMETIVVLKKIAP	WP_027402982_9	none
31368	WP_015078657	#FF69B4	Anabaena	none	none	cc26	Anabaena sp. 90	3956	11	7.81	yes	MNNGKINQPNRKNNAPRIAPYNQTLKWKLIDSLAFSLTTGSSDTNSMAMGKPTETIVVLKKIAP	WP_015078657_11	none
31370	WP_096664869	#FF69B4	Dolichospermum	none	none	cc26	Dolichospermum compactum NIES-806	4073	8	9.25	yes	MNNGTINQPIRKNNAPRIDPYNQTLKWKLIDSLALSLTTGSSDTKSMAIGNPMETMVVLKKIAP	WP_096664869_8	none
31372	WP_168465654	#FF69B4	Aphanizomenon	none	none	cc26	Aphanizomenon sp. UHCC 0183	4140	9	8.5	yes	MNNGKINQPKRKNNAPRIAPYNQTLKWKLIDSLALSLTTGSSDTNSMAIGKPMETMVVLKKIAP	WP_168465654_9	none
31384	WP_103138934	#40FFFF	Nostoc	none	none	cc31	Nostoc sp. CENA543	2445	3	5.03	no	MNLRVLASLKAKKTTKTAVTQVARIKAQACPCNCK	WP_103138934_3	none
31385	WP_096561092	#40FFFF	Scytonema	none	none	cc31	Scytonema sp. NIES-4073	2629	3	-1.21	no	MNPAGINLRVLTSRNPKTTIKTAVITTANVKPQVCPWRWTKAAIISSKPLMIPLIRETLLFALR	WP_096561092_3	none
31387	BAZ29305	#40FFFF	Cylindrospermum	none	none	cc31	Cylindrospermum sp. NIES-4074	2280	3	2.25	no	MIINPAGINLRVLASLKEKTTTKTPVTKAAKIKAQVCPWSVK	BAZ29305_3	none
31389	WP_089092704	#40FFFF	Nodularia	none	none	cc31	Nodularia sp. NIES-3585	2023	3	2.51	no	MNVNANTPKITIIPAGINLRVLANLNAKKITKLTVTKTAKIKAQA	WP_089092704_3	none
31392	WP_095720237	#40FFFF	Calothrix	none	none	cc31	Calothrix elsteri CCALA 953	2352	2	4.62	no	MIISVVIPKPVIKPAGMNLRVFCNLIAKTMTNMPVITAAKARANPCL	WP_095720237_2	none
31395	TAE58797	#40FFFF	Nostocales	Cobalamin synthesis G N-terminal	PF11760.8	cc31	Nostocales cyanobacterium	1784	2	4.8	no	MTKANTPKITINPAGINLRVLASLIAKKVTINPVTTPAKAKPQVIPCNWQ	TAE58797_2	2.40E-06
31402	WP_012409237	#804040	Nostoc	Protein of unknown function (DUF433)	PF04255.14	cc28	Nostoc punctiforme PCC 73102	2030	4	24.34	no	MSDNDLLSRISIDPNICFGKPCIRGHRIWVSLILDYLAGGTTIEEVLEAYPSIEREDVLACIAYGAEMVRDVFVELPLTKKKEASA	WP_012409237_4	8.00E-31
31403	WP_094345265	#804040	Nostoc	Protein of unknown function (DUF433)	PF04255.14	cc28	Nostoc sp. Peltigera membranacea cyanobiont 232	2035	3	24.42	no	MSDNDLLSRISIDPNICFGKPCIRGHRIWVSLILDYLAGGTTIEEVLEVYPSIEREDVLACIAYGAEMARDVFVELPLTKKKEASA	WP_094345265_3	3.30E-30
31405	WP_006622760	#804040	Arthrospira	Protein of unknown function (DUF433)	PF04255.14	cc28	Arthrospira platensis C1	188	5	32.38	yes	MLNWQEQIEKNPNICHGKPCIKGTRIMVSVILDNLAEGLTLAEIVEEYPPLTLENVRSAIAYAAALAREEELSPT	WP_006622760_5	1.90E-29
31406	WP_006619051	#804040	Arthrospira	Protein of unknown function (DUF433)	PF04255.14	cc28	Arthrospira platensis YZ	2270	2	33.48	yes	MIDWQKQIERNPNICHGKPCIKGTRIMVSVILDNLAEGLTLAEIVEDYPPLTLENVRSAIAYAAALAREEELSPTR	WP_006619051_2	1.40E-29
31408	WP_109006830	#804040	Nostoc	Protein of unknown function (DUF433)	PF04255.14	cc28	Nostoc commune NIES-4072	3772	2	31.07	no	MTKNDLLSRISIDPNICFGKPCIKGHRIWVSLILDLLASGEKIETILEEYPGLEREDILACITYAAEMTRDSYVEIPLGLQKESKK	WP_109006830_2	2.70E-31
31414	WP_012409237	#804040	Nostoc	Protein of unknown function (DUF433)	PF04255.14	cc28	Nostoc punctiforme PCC 73102	4450	1	39.8	no	MNEQTLLERITFNPQIFGGKPIIRGRRLAVEHILGMLAVGDTIETLLEAYPWLEREDVQACLIYARRLVGHERIEPLLIESPR	WP_012409237_1	1.70E-27
31421	WP_112963677	#000040	Rhizobiales	Protein of unknown function (DUF3072)	PF11272.8	cc42	Rhizobiales bacterium	4467	2	21.01	no	MTDPQKQYIMTFRHNAKQPPAWQQIVAEIPGVTVISILGRQSRIKANAAAIRALREQFSSDILIEEDLPRHF	WP_112963677_2	9.70E-06
31422	WP_042619690	#000040	Agrobacterium	S-adenosyl-L-homocysteine hydrolase	PF05221.17	cc42	Agrobacterium tumefaciens	4449	5	14.32	no	MTNPEKIYLITIRHSEPQPDNWQETFSQISGITLISTTGRHARIKATPENLKSALVALGPNAMAEEELPRHI	WP_042619690_5	1.70E-05
31424	WP_067652746	#000040	Agrobacterium	none	none	cc42	Agrobacterium bohemicum	4738	2	22.06	no	MTEPEKTYTATFRHNARQPQDWQKTLSRIPGLTLISATGRHARIKGTLEAIAKLGDDVIVEEELPRYL	WP_067652746_2	none
31426	WP_062451377	#000040	Rhizobium	Phosphoribosylglycinamide synthetase, C domain	PF02843.16	cc42	Rhizobium sp. Leaf262	4360	1	13.7	no	MTESEKIYLITFRHDAPQPPDWQSNLSKIPGLRLLSTTGRYARITCTAETLTKARATLGQDAIIEEEIPRYF	WP_062451377_1	1.10E-05
31431	WP_111838980	#000040	Rhizobiales	none	none	cc42	Rhizobiales bacterium	4555	1	20.86	no	MSKSRKIYRITFRHDATPPANWQTILSNTPGLTLLATTGRHARIEAAPEALDTLRAIMGDGVMMEEEMQRYF	WP_111838980_1	none
31435	WP_062437448	#FF4000	Herbidospora	mttA/Hcf106 family	PF02416.16	cc41	Herbidospora daliensis	7285	2	71.03	no	MGSLGPTELIIIGLIIILLFGAKKLPDTARALGQSLRLFKKETQKLREEDDDKSTVVQAQAETVTPQPAPAPPAQIPPATATPSVEDRLRQLEEENAKLRATSQPAAQPSDKKN	WP_062437448_2	7.70E-24
31436	WP_161483240	#FF4000	Herbidospora	mttA/Hcf106 family	PF02416.16	cc41	Herbidospora sp. NEAU-GS84	7316	2	64.58	no	MGSLGPTELIIIGLIVILLFGAKKLPDTARALGQSLRLFKKETQKLREDDDDKATVVQAETVTPQPAPAPPAQIPPATPTPSVEDRLRQLEEENAKLRATSQPAAQPSDKKN	WP_161483240_2	1.00E-23
31438	WP_030452416	#FF4000	Herbidospora	mttA/Hcf106 family	PF02416.16	cc41	Herbidospora cretacea	7316	2	69.76	no	MGSLGPTELIIIGLIIILLFGAKKLPDTARALGQSLRLFKKETQKLREEDDDKSTVVQAQAETVTPQPAPVPPAQIPPATPTPSVEDRLRQLEEENAKLRATSQPAAQPSDKKN	WP_030452416_2	7.90E-24
31440	WP_062348671	#FF4000	Herbidospora	mttA/Hcf106 family	PF02416.16	cc41	Herbidospora yilanensis	7290	2	69.65	no	MGSLGPTELIIIGLIIILLFGAKKLPDTARALGQSLRLFKKETQKLREEDDDKSTVVQAQAETVTPQPAPAPPAQIPPATPTPSVEDRLRQLEEENAKLRATSQPAAQPSDKKN	WP_062348671_2	7.70E-24
31442	WP_137248807	#FF4000	Herbidospora	mttA/Hcf106 family	PF02416.16	cc41	Herbidospora galbida	7289	2	71.66	no	MGSLGPTELIIIGLIIILLFGAKKLPDTARALGQSLRLFKKETQKLREEDDDKSTVVQAQAETVTPQAAPVPPAQIPPATPTPSVEDRLRQLEEENAKLRATSQPAAQPSDKQN	WP_137248807_2	5.40E-24
31450	WP_067652746	#40FF80	Agrobacterium	none	none	cc37	Agrobacterium bohemicum	1486	3	14.15	yes	MTANSIVTLALIALPIYFFFRWVQYDSEKQDKQK	WP_067652746_3	none
31451	WP_111838980	#40FF80	Rhizobiales	none	none	cc37	Rhizobiales bacterium	1509	2	10.17	yes	MFANSIVTLALIALPIYFFFRWVQYDSENQDKPK	WP_111838980_2	none
31453	WP_112963677	#40FF80	Rhizobiales	none	none	cc37	Rhizobiales bacterium	1475	3	13.08	yes	MLANSIVTLALIALPIYLFFRWVQYDSERQDGKK	WP_112963677_3	none
31454	WP_062451377	#40FF80	Rhizobium	none	none	cc37	Rhizobium sp. Leaf262	1535	2	9.92	yes	MFANSIFTLALIALPIYFFFRWVQYDSENQDKPK	WP_062451377_2	none
31457	WP_042619690	#40FF80	Agrobacterium	none	none	cc37	Agrobacterium tumefaciens	1527	6	7.84	yes	MFANSIVTLALIALPIYVFFRWVQYDSERQDKPK	WP_042619690_6	none
31465	WP_012409237	#8040FF	Nostoc	Zinc-binding domain of primase-helicase	PF08273.12	cc38	Nostoc punctiforme PCC 73102	2525	5	18.31	yes	MSTRANTCPCCGGSLLRHARHGELYWFCLSCRQEVPLLTVIRLPNVDTRNTGVVPQPVVNT	WP_012409237_5	2.30E-05
31466	WP_094345265	#8040FF	Nostoc	none	none	cc38	Nostoc sp. Peltigera membranacea cyanobiont 232	2463	4	13.22	yes	MSTKANTCPCCSGSLLRHARHGELYWFCLSCRQEVPLLTATRLPNVETRNTGVLPQPVVNT	WP_094345265_4	none
31468	RCJ34841	#8040FF	Nostoc	Zinc-binding domain of primase-helicase	PF08273.12	cc38	Nostoc punctiforme NIES-2108	2723	3	14.77	yes	MSTRANTCPCCGGSLLRHARHGELYWFCLSCRQEVPLLTVPLLNTTCLPNVETRNTGVVPQPVVNT	RCJ34841_3	5.20E-05
31470	WP_138498765	#8040FF	Nostoc	Double zinc ribbon	PF12773.7	cc38	Nostoc sp. PA-18-2419	2397	2	8.38	yes	MSTRANTCPCCGSSLLRHVRHGELYWFCLSCRQEVPLLTMTRLPNVESRNTGVLPQTAVNS	WP_138498765_2	1.30E-06
31475	WP_144874993	#8040FF	Hyella	none	none	cc38	Hyella patelloides LEGE 07179	2372	3	-20.47	yes	MTYKSKTCPCRGNLIRRCIL	WP_144874993_3	none
31477	WP_028525980	#4000FF	Runella	none	none	cc40	Runella limosa DSM 17973	2020	3	26.48	yes	MKRIKSYTLGWNTLQKEGYVTLTDESQRDHSFEKVSLEEMALLQKLLYQDEAYLDEQKWLIVGWKKKG	WP_028525980_3	none
31478	WP_109741224	#4000FF	Arcicella	Large polyvalent protein-associated domain 18	PF18832.1	cc40	Arcicella aurantiaca	2043	4	26.78	yes	MKRIVKYTIGWDIEGKEGYFTAIDETQMSHVFGKIPPSEFHILVDMLKESNVFIDNNKWIISGWEGEKH	WP_109741224_4	6.00E-06
31480	WP_122933410	#4000FF	Runella	none	none	cc40	Runella sp. SP2	2051	1	28.88	yes	MKRIKSYTLGWNTTQKEGYITLTDDSQKDHSFEKISLEEMALLQKMLFQDDAYLDEQQWLIVGWKKRD	WP_122933410_1	none
31482	WP_166551441	#4000FF	Cellulophaga	TolB-like 6-blade propeller-like	PF15869.5	cc40	Cellulophaga sp. BC115SP	2148	2	14.36	yes	MQTIKTYTIGWDVINKVGYLTILDETGNEHVFSELSLEELTFLQSMLQSPSVLIDPQNWIVAGWQINSSVNMGK	WP_166551441_2	1.50E-05
31483	WP_141234752	#4000FF	Flectobacillus	none	none	cc40	Flectobacillus sp. BAB-3569	2042	1	22.47	yes	MVLGSAKKIFTFTPMQTIKTYTIGWDVINKVGYLTILDDTGKEHIFSELSLDELTFLQSMLQNPSVLIDPQNWIVAGWQINSSVNMGK	WP_141234752_1	none
31488	WP_051418997	#00FF40	Salinispora	none	none	cc39	Salinispora tropica CNH898	3194	2	13.36	yes	MVRAIPPVVRAIAIAQFCDERAVMSVARSRIGTSGLAAGLNAGAWAPPSVTSSSTAEV	WP_051418997_2	none
31489	WP_157857956	#00FF40	Streptomyces	none	none	cc39	Streptomyces durhamensis	3395	3	-5.24	no	MMVARIAHGMVGLNAGAASLPSYRPSSSAEV	WP_157857956_3	none
31491	WP_106331017	#00FF40	Actinoplanes	none	none	cc39	Actinoplanes italicus	2852	5	17.1	yes	MVFETPPVARAIDSAQRVEELAAMMLARIRIGTRGLTAGLKAGAFAPASISSSSSAEVYSV	WP_106331017_5	none
31493	WP_093908736	#00FF40	Streptomyces	none	none	cc39	Streptomyces sp. cf386	2772	5	9.51	no	MWFGLPGEGPAAWPAPAPPRGSLLGVSRQHLFSMVLAVSEPMAAAHCCEERAVMMVARIAHGMVGLNAGAASLPSYRPSSSAEV	WP_093908736_5	none
31497	WP_094742457	#00FF40	Rhodococcus	Bacterial capsule synthesis protein PGA_cap	PF09587.10	cc39	Rhodococcus sp. 14-2483-1-2	2581	4	11.62	no	MVFPMFGVPPAIPAAHWVEERAEIIVARISKIANAGVDAGADAPAMPLEASSSSEV	WP_094742457_4	9.70E-06
31499	WP_092614753	#FF8040	Jiangella	none	none	cc36	Jiangella sp. DSM 45060	1062	1	39.67	yes	MSAQNLFGTPAEQAALSADVAERAETTEDGLAPIVIASIIYCPSIIAASYGFSC	WP_092614753_1	none
31500	WP_135099815	#FF8040	Blastococcus	none	none	cc36	Blastococcus sp. AZ43	1511	2	43.44	yes	MSAEALFGEGQDRTEFEELAVERAVAEETTEDNLAPIVIASIMYCPSIAAATYGFGC	WP_135099815_2	none
31502	WP_116947187	#FF8040	Jiangella	none	none	cc36	Jiangella sp. KE2-3	1070	1	45.93	yes	MSAQNLFGTPAEQAALSADVAERAAETTEDGLAPIVIASIIYCPSIIAASYGFSC	WP_116947187_1	none
31504	WP_069110514	#FF8040	Jiangella	none	none	cc36	Jiangella alba	1062	1	40.3	yes	MSAQNLFGTPAEQAALSADVAERAETTEDGLAPIVIASIIYCPSIIAASYGFSC	WP_069110514_1	none
31508	WP_135099815	#FF8040	Blastococcus	none	none	cc36	Blastococcus sp. AZ43	1158	3	42.97	yes	MSAEALFGDGPDRAEFEVQAAERADVEPDTHDHVSPVTLSIAYCPALVAATYAYEC	WP_135099815_3	none
31514	WP_073644071	#40FF00	Nostoc	none	none	cc34	Nostoc calcicola FACHB-389	4614	7	25.37	yes	MVRIKIYDLYPSTNKQFLNEITVGETKKVEGGVGYTGFDRELPNTFDTNNSSSPVNPEVSSPGNSLQQVNSLLDSFRLGLDKVFQRLV	WP_073644071_7	none
31515	WP_096559014	#40FF00	Nostoc	Domain of unknown function (DUF4761)	PF15958.5	cc34	Nostoc sp. NIES-4103	5882	2	31.34	yes	MVRIEISDLHSHVDEPLLNEITHREIKVVEGGVVARRDPYSIYRNDIPNTENTDNRSNNDTSIASTLRQVNGLLDNLRLELDKIFGRL	WP_096559014_2	7.40E-06
31517	WP_096536886	#40FF00	Nostoc	none	none	cc34	Nostoc linckia NIES-25	4380	7	24.08	yes	MVRIQIYDLHPSADKEPIDEISAGEMKRVQGGVLSNSMGREFSNSLEGNNPSTTTEPQSSRVNSLQEVNALLDNFRIELDKVFRRLV	WP_096536886_7	none
31519	RCJ14929	#40FF00	Nostoc	Type-A lantibiotic	PF04604.13	cc34	Nostoc sp. ATCC 43529	4449	7	22.65	yes	MVRIQIYDLHPSSDKELINEVNAGELKTVQGGVQSNATGRQFSNTFGENNPSTTTEPEPSRINSLQEVNSLLDNFRLELDKIFRRLV	RCJ14929_7	0.0001
31521	WP_099071810	#40FF00	Nostoc	Leucine zipper	PF15294.6	cc34	Nostoc linckia z15	4046	5	26.85	yes	MVRIKVYELHPSADKELINEITAREMKTVEGGVGSNPTNRQFSNTLDPINQSTTAEPESSRINSLQEVNSLLDNFRLELDKIFRRLV	WP_099071810_5	6.70E-07
31529	WP_047015652	#FF0040	Streptomyces	none	none	cc33	Streptomyces sp. CNQ-509	5143	2	25.44	yes	MPPETATAELTTESAPEASWEELVATALSGVEESPGWTDCWPTNPSCCSTCSLSAPDGTE	WP_047015652_2	none
31530	WP_051368293	#FF0040	Streptomyces	none	none	cc33	Streptomyces sp. CNQ329	5138	2	24.27	yes	MPPETATAELTTESAPEASWEELVATALSGVEESPGWTDCWPTNPSCCSTCSLSAPDGTE	WP_051368293_2	none
31532	WP_159425396	#FF0040	Streptomyces	none	none	cc33	Streptomyces lincolnensis	5221	2	8.7	yes	MGKFTIRDVSESGWESLVVTALMGIEESPGWTDCWPTGGTSGACCTTSPAAPEPGV	WP_159425396_2	none
31534	TDT36016	#FF0040	Streptomyces	none	none	cc33	Streptomyces sp. BK447	5450	4	16.61	yes	MSKFTIRDVSESGWESLVVTALMGIEESPGWTDCWPTGGTSGVCCTTSPAAPEPRN	TDT36016_4	none
31536	WP_051642643	#FF0040	Streptomyces	none	none	cc33	Streptomyces sp. CNQ-525	5142	2	24.64	yes	MPPETATAELTTESAPDASWEELVATALSGVEESPGWTDCWPTNPSCCSTCSLSAPDGTE	WP_051642643_2	none
31544	WP_062348671	#0040FF	Herbidospora	Inclusion membrane protein D	PF17628.2	cc35	Herbidospora yilanensis	2517	5	43.04	no	MFALLAAVLFLAALVFAIGGYAVGAVLTVTTLTIAGAVFLALHLGGYGTTWSLKK	WP_062348671_5	6.00E-05
31545	WP_030452416	#0040FF	Herbidospora	ABC-2 family transporter protein	PF12698.7	cc35	Herbidospora cretacea	2543	5	44.28	no	MFALLAALLFLVALVFAIGGYAVGAVLTVTTLTIAGAVFLALHLGGYGTTWSLKK	WP_030452416_5	0.00036
31547	WP_137248807	#0040FF	Herbidospora	Inclusion membrane protein D	PF17628.2	cc35	Herbidospora galbida	2518	5	34.13	no	MFALLAAVLFLVALVFAIGGYAVGAVLTVTTLTIAGAVFLALHLGGYGTTWSLRK	WP_137248807_5	0.00013
31550	WP_161483240	#0040FF	Herbidospora	Inclusion membrane protein D	PF17628.2	cc35	Herbidospora sp. NEAU-GS84	2543	5	45.93	no	MFALLAAVLFLVALVFAIGGYAVGAVLTVTTLTIAGAVFLALHLGGYGTTWSLKK	WP_161483240_5	0.00013
31554	WP_062437448	#0040FF	Herbidospora	Inclusion membrane protein D	PF17628.2	cc35	Herbidospora daliensis	2508	5	41.41	no	MFALLAAVLFLVALVFAIGGYAVGAVLTVTTLTIAGAVFLALHLGGYGTTWSLRK	WP_062437448_5	0.00013
31559	WP_170198719	#FF40FF	Thermopolyspora	none	none	cc32	Thermopolyspora flexuosa	183	3	-4.45	no	MAPAEAPISALTHHFELAAETAQTGEVAGASTLASMFSSAAVA	WP_170198719_3	none
31560	AWS47415	#FF40FF	Streptosporangium	none	none	cc32	Streptosporangium sp. caverna	111	7	11.88	no	MAPPAALAAALAQYHELATLTATEAAHTGVVAGASTLAAMLSSLALAYAL	AWS47415_7	none
31562	WP_078760724	#FF40FF	Marinactinospora	none	none	cc32	Marinactinospora thermotolerans DSM 45154	123	3	4.2	no	MQGRVVIETVVTVIDAGASAAALMFSSATSV	WP_078760724_3	none
31564	WP_137451632	#FF40FF	Nakamurella	none	none	cc32	Nakamurella flava	203	5	9.95	no	MVAIPAPLPAAHFHELIAVAMQTGEVLAAGAGLVASTFSSLSSV	WP_137451632_5	none
31567	WP_141936425	#FF40FF	Microbacterium	none	none	cc32	Microbacterium sp. SLBN-154	263	5	9.44	no	MVTPVLVTAPALAPMEKATHSGEEAVRNTLTVDGVAAGAASPVRADSSDACA	WP_141936425_5	none
31569	WP_016495430	#800040	Pseudomonas	Transglycosylase associated protein	PF04226.13	cc51	Pseudomonas resinovorans NBRC 106553	2058	1	66.24	yes	MGIIGTIIIGLIVGVIARFIKPGDDSMGWIMTILLGIGGSLLATYGGQALGIYQAGQAAGFIGAVIGAVVLLVIYGLVKKS	WP_016495430_1	0.014
31570	WP_109003510	#800040	Streptomyces	Putative threonine/serine exporter	PF06738.12	cc51	Streptomyces rishiriensis	3604	1	75.79	no	MGIIAWIIIGLLAGAIAKALMPGKDPGGIIITMLIGIAGGLLGGWLGKVIFGVDSIDGFFDLSTWIAAIVGSFILLALYRLVTGNRHSHRHA	WP_109003510_1	0.00013
31572	WP_015193424	#800040	Stanieria	Endomembrane protein 70	PF02990.16	cc51	Stanieria cyanosphaera PCC 7437	6772	1	60.12	no	MGIIAWIVLGLIAGAIAKLIYPGSQGGGIFATIGLGILGALVGGYLGQVLLGSSGAAAASVGALTIPSIIFAVLGSLLLIFIWGLITRRAA	WP_015193424_1	1.40E-05
31573	WP_015193424	#800040	Stanieria	Endomembrane protein 70	PF02990.16	cc51	Stanieria cyanosphaera PCC 7437	6423	2	56.08	no	MGIIAWIVLGLIAGALAKLIYPGHQGGGIFATIGLGILGALVGGYLGQVLLGSSGAAAASAGALTIPSIIFAVLGAMILIFIWGLITRRAA	WP_015193424_2	1.10E-05
31577	BAZ15600	#4080FF	Calothrix	Membrane-associated sensor domain	PF17159.4	cc49	Calothrix sp. NIES-4071	5760	3	20.49	no	MQLQYFLIISAALFCIGIFGLITSRNAVRVLMSIELLLNAVNLNLMAFSNYLDPAEIKGQVFTVFVITVAAAEAAVGLAIVLAIYRNRDTVDMEQFNLLKW	BAZ15600_3	0.0086
31578	WP_026093360	#4080FF	Calothrix	yiaA/B two helix domain	PF05360.14	cc49	Calothrix sp. PCC 7103	5400	2	23.71	no	MQLQYFLILAAALFCIGIFGLITSRNAVRVLMSIELLLNAVNLNLMAFSNYLDPAEIKGQVFTVFVITVAAAEAAVGLAIVLAIYRNRDTVDMEQFNLLKW	WP_026093360_2	0.00014
31580	TWH40986	#4080FF	Calothrix	yiaA/B two helix domain	PF05360.14	cc49	Calothrix desertica PCC 7102	5227	2	26.29	no	MQLQYFLILAAALFCIGIFGLITSRNAVRVLMSIELLLNAVNLNLMAFSNYLDPVEIKGQVFTVFVITVAAAEAAVGLAIVLAIYRNRDTVDMEQFNLLKW	TWH40986_2	0.00014
31582	WP_073619367	#4080FF	Calothrix	yiaA/B two helix domain	PF05360.14	cc49	Calothrix sp. HK-06	3522	2	23.99	no	MQLQYFLILAAALFCIGIFGLITSRNAVRVLMSIELLLNAVNLNLMAFSNYLDPVEIKGQVFTVFVITVAAAEAAVGLAIVLAIYRNRDTVDMEQFNLLKW	WP_073619367_2	0.00014
31587	BAZ86949	#80FF40	Dolichospermum	Rieske [2Fe-2S] domain	PF00355.26	cc48	Dolichospermum compactum NIES-806	4989	1	51.61	yes	MAWTQVLAANALAAGAREVVKVGDRKILLLNHENQIYAVDDTCPHLKMSLKKGKIEDGAIVCPFHRSAFDLGNGEVKTWCPFPPVVGKLLSMVSSQKTLPTYPIKVEAGNILIDV	BAZ86949_1	1.50E-21
31588	WP_168646604	#80FF40	Dolichospermum	Rieske [2Fe-2S] domain	PF00355.26	cc48	Dolichospermum sp. UHCC 0259	4659	1	52.99	yes	MAWTQVLAANALAAGAREVVKVGDRKILLLNHDNQLYAVNDTCPHLKMSLKKGKIEDGAIVCPFHRSAFDLGNGEVKTWCPFPPVVGKLLSMVSSEKTLPTYPIKVEAGNILIDV	WP_168646604_1	8.30E-22
31590	WP_027403439	#80FF40	Aphanizomenon	Rieske [2Fe-2S] domain	PF00355.26	cc48	Aphanizomenon flos-aquae NIES-81	5060	1	49.99	yes	MAWTQVLAANALAAGAREVVKVGDRKILLLNHENQLYAVDDTCPHLKMSLKKGKIEDGAIVCPFHRSAFDLGNGEVKTWCPFPPVVGKLLSMVSSEKTLPTYPIKVEAGNILIDV	WP_027403439_1	2.30E-21
31592	OBQ23191	#80FF40	Anabaena	Rieske [2Fe-2S] domain	PF00355.26	cc48	Anabaena sp. WA113	4635	1	52.14	yes	MAWTQVLAANALTEGAREVVKVGERKILLLNHENQLYAVDDTCPHLKMSLKKGKIENGAIVCPVHRSAFDLGNGEVKTWCPFPPVVGKLLSMVSSEKTLPTYPLKVEEGNILIDV	OBQ23191_1	1.70E-21
31597	WP_068252194	#408080	Rathayibacter	none	none	cc55	Rathayibacter tritici	1018	3	-3.54	no	MIAHAHFGRYRVPALRIRST	WP_068252194_3	none
31598	WP_068208510	#408080	Rathayibacter	none	none	cc55	Rathayibacter tanaceti	1018	3	-4.28	no	MIAHAHFGRCRVPALRIRST	WP_068208510_3	none
31600	KKT87137	#408080	Candidatus	Dihydrodipicolinate reductase, N-terminus	PF01113.20	cc55	Candidatus Moranbacteria bacterium GW2011_GWC2_45_10	942	2	16.9	yes	MTKIAINGFGRIGRPSLKIAFEKESLSVVAINDLTDIETVAHLLKYDSSYGIYQRDVNVDKENSELIIDGTRIKYFSEKDPANLPWGELGVDVVLECTGAFLERKKS	KKT87137_2	4.00E-06
31602	WP_125690181	#408080	Amycolatopsis	none	none	cc55	Amycolatopsis sp. WAC 04169	6088	3	-1.12	yes	MSGTASAQEHPGGCAVAGCEAAGLVEVQTIVHEHAGVCTAPVAIRTSIHGSANELCTRSGAQFVR	WP_125690181_3	none
31605	WP_015189896	#408000	Gloeocapsa	Ribosomal protein S20	PF01649.18	cc52	Gloeocapsa sp. PCC 7428	5514	4	12.94	no	MANTKSAIKRIKIAERNRLRNKAYKSAVRTLMKKYLTAVDIYAANPTPEAKQEVLSHMAAAYSKIDKAVKRGVLHPNNGARKKSRLVKRLRQHEQAEATGN	WP_015189896_4	7.70E-33
31606	WP_096597905	#408000	Calothrix	Photosystem I reaction centre subunit III	PF02507.15	cc52	Calothrix sp. NIES-2100	4495	1	19.57	yes	MYILIVFLELTVANTKSALKRAEIGERNRLRNKAYKSAVKTLMKKYLNAVNVYAANPTPELNQEVQARLSEAYSKIDKAVKRGILHPNNGARKKSRLAHKLKPLTQTAQ	WP_096597905_1	6.00E-05
31608	WP_105222244	#408000	Gloeocapsopsis	Ribosomal protein S20	PF01649.18	cc52	Gloeocapsopsis sp. AAB1 = 1H9	5415	4	15.25	no	MANTKSAIKRIKIAERNRLRNKAYKSAVRTLMKKYLTAVDTYAANPTPEAKQEVLSRMAAAYSKIDKAVKRGVLHPNNGARKKSRLVKRLKQHEQVEATGN	WP_105222244_4	3.10E-33
31611	WP_099700413	#408000	Chroococcales	Ribosomal protein S20	PF01649.18	cc52	Chroococcales cyanobacterium IPPAS B-1203	6400	5	17.35	no	MANTKSAIKRIKIAERNRLRNKAYKSAVKTLMKKYLTAVDTYAADPTPEAKQEVLSRMAAAYSKIDKAVKRGVLHPNNGARKKSRLVKRLKQHEQAEATGN	WP_099700413_5	2.70E-33
31615	WP_086835908	#804080	Nostoc	RiPP_CCRG-2: CCRG-2 family RiPP	NF033456.1	cc56	Nostoc sp. RF31YmG	10441	9005	18.6	yes	MKNNNTKNSVALLRVNSSQTKQAQVKHTTKLSVSELSEEELSQVCGGGGGFVDWN	WP_086835908_9005	8.30E-06
31616	WP_086835908	#804080	Nostoc	RiPP_CCRG-2: CCRG-2 family RiPP	NF033456.1	cc56	Nostoc sp. RF31YmG	10165	9006	18.29	yes	MTNNNTKNSVALLRVNSSQTKQAQVKHTTKLSVSELSEEELSQVCGGGAGSVSWD	WP_086835908_9006	8.30E-06
31618	WP_086835908	#804080	Nostoc	RiPP_CCRG-2: CCRG-2 family RiPP	NF033456.1	cc56	Nostoc sp. RF31YmG	10993	9007	16.66	yes	MTNNNTKNSVALLRVNSSQTKQAQVKHTTKLSVSELSEKELSQVCGGGSGYVEWD	WP_086835908_9007	0.00022
31620	WP_086835908	#804080	Nostoc	RiPP_CCRG-2: CCRG-2 family RiPP	NF033456.1	cc56	Nostoc sp. RF31YmG	10717	9004	18.72	yes	MTNNNTKNSVALLRVNSSQTKQAQVKHTTKLSVSELSEEELSQVCGGGTGYVSWD	WP_086835908_9004	8.30E-06
31625	WP_008180360	#008040	Moorea	none	none	cc45	Moorea producens 3L	4699	6	20.72	yes	MTFSTDTMTKSTMYTTVDETGVLNNYAPETEIYYADFPSVEQQRNYISQGAIASLLVCLLILTAFGIS	WP_008180360_6	none
31626	WP_087592205	#008040	Cyanobacteria	none	none	cc45	Cyanobacteria unicellular cyanobacterium SU3	5424	10	19.01	no	MFTTSDENGILNNFANEPDMYYATYPTQQQQRGYLVQGVFATLLIIGLGVVVTLIS	WP_087592205_10	none
31628	WP_008180360	#008040	Moorea	none	none	cc45	Moorea producens 3L	4142	8	12.2	yes	MTFSTNTMTKSTMYTTVDETGVLNNYAPETEIYYADFPTLEQQRNYISQGAIASLLVCLLILTAFGIS	WP_008180360_8	none
31630	WP_008180360	#008040	Moorea	Immune evasion protein	PF12216.8	cc45	Moorea producens 3L	5293	5	21.41	yes	MTFSTNTITKSTMYTTVDETGVLNNYAPETEIYYADFPTLEQQRNYITQGAIASFLVSLLILTAFGIS	WP_008180360_5	5.70E-06
31635	RZJ53728	#400080	Flavobacterium	none	none	cc46	Flavobacterium sp.	2772	2	-5.0	yes	MLTTIKTNMCLHDIAKKKLLSIKF	RZJ53728_2	none
31636	WP_047775239	#400080	Flavobacterium	none	none	cc46	Flavobacterium sp. ABG	2694	1	6.54	yes	MRQLLFILLSEYYMTIKTIMCLHAKEKKL	WP_047775239_1	none
31638	WP_166925083	#400080	Flavobacterium	none	none	cc46	Flavobacterium sp. JXAS1	2960	1	11.46	yes	MRQMLFILLPECYMAIKTNMCLHAIEESYRPYLFQTISKSTKEQGRKPKNPKKE	WP_166925083_1	none
31639	WP_047775239	#400080	Flavobacterium	none	none	cc46	Flavobacterium sp. ABG	2618	2	2.45	yes	MLKRKSYSPYLFQTISKSTKKQGRKPKNPKKE	WP_047775239_2	none
31642	WP_037567380	#804000	Staphylococcus	Putative zinc finger motif, C2HC5-type	PF06221.13	cc47	Staphylococcus agnetis	5805	1	46.77	no	MTTALPNCPSCGSEYTYQDGALYVCPMCAHEWTPESVVEAEEAAIIRDANGNELKDGDTVAVIRDLKVKGASSTIKQGTKVKNIRLVDPEDGHDIDCKIPGFGQIGLKSEVVKKIN	WP_037567380_1	2.60E-05
31643	WP_096547181	#804000	Staphylococcus	Predicted membrane protein (DUF2318)	PF10080.9	cc47	Staphylococcus delphini	5271	3	36.74	no	MTTAIPNCPQCDSEYTYEDGGLYICPMCAYEWTNDTLEAAAEQAVIRDANGNPLQDGDTVAVIRDLKIKGSSQMIKQGTKVKNIKLVDPEDGHDIDCKIPGFGQIGLKSEVVKKIK	WP_096547181_3	5.30E-05
31645	WP_162681093	#804000	Staphylococcus	Predicted membrane protein (DUF2318)	PF10080.9	cc47	Staphylococcus sp. MI 10-1553	5600	2	37.19	no	MTTAIPNCPQCDSEYTYEDGGLYICPMCAYEWTNDTLEAATEQAIIRDANGNPLQDGDTVSVIRDLKIKGSSQMIKQGTKVKNIKLVDPEDGHDIDCKIPGFGQIGLKSEVVKKIK	WP_162681093_2	5.90E-05
31647	WP_141366901	#804000	Glutamicibacter	Zinc ribbon domain	PF09723.10	cc47	Glutamicibacter uratoxydans	3993	1	37.38	yes	MSDTLPPCPKCSSEYTYEMDALLVCPECGHEWNAEAEESPAAELVIKDAVGNVLQDGDTVSITKTMKVKGAQSALKAGTKVRNIRLVPDNGDHDIAAKVDGFGQMELKSSIVKKI	WP_141366901_1	0.016
31652	WP_053002257	#400000	Kordia	Carboxymuconolactone decarboxylase family	PF02627.20	cc43	Kordia jejudonensis	1808	1	49.1	yes	MDKSYYNPRDLKKFGSITEWSEELGNKFFEYYGKVFEEGALTPREKSLIALAVAHTEQCPYCIDAYSQDGLQRGITKEEMMEAIHVGAAIKSGATLVHGVQMMNKVNKLEM	WP_053002257_1	6.40E-22
31653	WP_052752730	#400000	Kordia	Carboxymuconolactone decarboxylase family	PF02627.20	cc43	Kordia zhangzhouensis	1659	1	54.91	yes	MDKSYYNPRDLKKFGSIAEWSKELGEKFFEYYGKVFEEGALTPREKSLIALAVAHTEQCPYCIDAYTQDGLQRGITKEEMMEAIHVGAAIKGGATLVHGVQMMNKVNKLEM	WP_052752730_1	2.20E-23
31655	WP_007095313	#400000	Kordia	Carboxymuconolactone decarboxylase family	PF02627.20	cc43	Kordia algicida OT-1	1773	1	51.38	yes	MDKSYYNPRDLKKFGSITEWSEELGNKFFEYYGKVFEEGALTPREKSLIALAVAHTEQCPYCIDAYSQDGLQRGITKEEMMEAIHVGAAIKSGATLVHGVQMMNKVNKLEM	WP_007095313_1	6.40E-22
31658	WP_114901352	#400000	Kordia	Carboxymuconolactone decarboxylase family	PF02627.20	cc43	Kordia sp. SMS9	1592	1	43.51	yes	MDKSYYNPRDLKKFGSITEWSEELGNKFFEYYGKVFEEGALTPREKSLIALAVAHTEQCPYCIDAYSQDGLQRGITKEEMMEAIHVGAAIKSGATLVHGVQMMNKVNKLEM	WP_114901352_1	6.40E-22
31662	BBC15200	#808040	Streptomyces	none	none	cc54	Streptomyces sp.	1190	2	0.33	no	MAAAAITLPCASSSGEMPAFSSRNACSSSGLTPASSSRAFSPAAGSMTARCSSVIDASASWILLTRSANAASSTAETIASD	BBC15200_2	none
31663	WP_046417231	#808040	Streptomyces	none	none	cc54	Streptomyces malaysiense	1341	2	-2.82	no	MTARCSSVIDASASWILLTRSANAVSSTAETIASDM	WP_046417231_2	none
31665	WP_039653089	#808040	Streptomyces	none	none	cc54	Streptomyces sp. MUSC 125	1199	2	-11.99	no	MAAAAITLPCASSSGEMPAFSSRKACSSSGLTPASSSRAFSPDAGSMMARCSSVIDASASWILLTRSANAVSSTAETIASDI	WP_039653089_2	none
31667	WP_159037419	#808040	Streptomyces	none	none	cc54	Streptomyces sp. NRRL S-4	1200	2	-7.83	no	MAAMTLPCASSSGDMPAFSSRNACRSSGLTPASSSRAFSPAAGSITARCSSVIASSASLILLTRSLNATSST	WP_159037419_2	none
31672	WP_060892878	#FF4080	Streptomyces	Tetratricopeptide repeat	PF13428.6	cc50	Streptomyces europaeiscabiei	2209	1	69.31	no	MFGNKETHLVALSDLDDAREAVRQALADASATDTPGLRAALSILDGFTGSDPRVRWVVKVLAEQGIDPRTNEVAAIKALRDALPGLSLVAATTLAREAKLSQTV	WP_060892878_1	8.40E-05
31673	WP_015659226	#FF4080	Streptomyces	Putative stress-induced transcription regulator	PF07336.11	cc50	Streptomyces davaonensis JCM 4913	2091	3	44.06	no	MLGSLGKKEAHLIALSDLDEAREAVRQALAGASAADEPGLRAALGILDGFAGSDPRVRWVARVLGERGIDPHTHEVAAIKALRDALPGLSLVAASTLVKEARQAA	WP_015659226_3	0.00021
31675	WP_153461219	#FF4080	Streptomyces	none	none	cc50	Streptomyces kaniharaensis	5601	1	71.75	yes	MFSSRETHLVVLRELDVVRTALREALAAAGPDEQRGLERALSVLDGLSGNEQQLKAKWVVGLLQHAGIDPRTEEMSAVRELRRAIPGLGLAAAVDLVKQANAAV	WP_153461219_1	none
31678	WP_054237388	#FF4080	Actinobacteria	none	none	cc50	Actinobacteria bacterium OK006	6670	1	63.02	no	MRSTKHLNLAVLHDLDAARGAIEEALAGADPARAPGLRRALSILEASAHSDDDLKIRWARQYLAEAGVPAGDTSAHAIRELRRAVPKLGLAEAVELVTLAAKH	WP_054237388_1	none
31681	BAZ15600	#004000	Calothrix	Bacterial protein of unknown function (DUF896)	PF05979.12	cc44	Calothrix sp. NIES-4071	654	1	31.88	no	MAPQVITPVLMIEPSSWLRAGINIEKVDGVNLVKLTNDIHTRLEELLEKRKAESLTSQEEAEYAGITELERILTFVNAKLIANCYH	BAZ15600_1	3.80E-06
31682	WP_096620836	#004000	Calothrix	none	none	cc44	Calothrix sp. NIES-3974	1451	2	23.74	yes	MITQMMVQPSSWVESGIKISKVRDLYLFKFTPELQSRLDDLNDKKKLDTLTSEEEAELTGILELDRIFTLLNAKIIAES	WP_096620836_2	none
31684	RCJ34841	#004000	Nostoc	Myelin gene regulatory factor -C-terminal domain 1	PF13887.6	cc44	Nostoc punctiforme NIES-2108	4205	2	35.04	yes	MTPQVITPVWMIEPSSWLRSGITIEKVDNVNLAKFTDELHTRLEELLEKRKSGLLTPEEEAEYAGIAELERILTFVNAKLIASRGC	RCJ34841_2	5.70E-06
31687	BAU44627	#004000	Leptolyngbya	Aida N-terminus	PF08910.10	cc44	Leptolyngbya sp. O-77	2507	3	25.9	no	MVTTLNKPSSLIHEIQLEKVGNWSLFKFSESLQLRMETLLEKKKADQLTPDEVAELDAIGELDRIFTHINAMLATQHADQ	BAU44627_3	4.60E-06
31690	WP_086760950	#FFC0C0	Nostoc	none	none	cc57	Nostoc sp. RF31YmG	3662	8	29.96	yes	MFSNRSNPLDITIPIFVIMGISQIILGNYVLAGIFLIIALGQFVVPRVGVNNLNQLHRPEVLFVWAMITTFTCLVIYQIYKDAFS	WP_086760950_8	none
31691	WP_104899482	#FFC0C0	Nostoc	none	none	cc57	Nostoc sp. Peltigera membranacea cyanobiont N6	2746	5	25.13	yes	MFNNRLNSVDITIPLFIIMGITQIVIGNYVTAGIWLIIALGQFVVPRVGVANLNQLHRPEVIFVWLMVATLTCLVIYQIYRDVVF	WP_104899482_5	none
31693	WP_096589596	#FFC0C0	Calothrix	none	none	cc57	Calothrix sp. NIES-2098	3543	9	28.69	yes	MFSNRSNPLDITIPIFIIMGISQIILGNYVLAGILLIIALGQFIVPRVGVHNLNQLHRPEVLFIWVMITTFTCLVIYQIYRDVIS	WP_096589596_9	none
31696	WP_167721203	#FFC0C0	Tolypothrix	none	none	cc57	Tolypothrix sp. PCC 7910	3693	7	26.34	yes	MFSNRSNALDITIPLFIIMGISQVIVGNYVAAGIWLIIALGQFVVPRVGVNNLNQLHRPEVLFVWLMIITFTCLVIYQIYIDAVS	WP_167721203_7	none
31700	WP_168501874	#004080	Anabaena	none	none	cc53	Anabaena sp. UHCC 0187	2250	3	19.89	yes	MRITVSDIYPLSSEQILKDLTIRELTTVIGGYRRQRTLPGNIETQLQEWRVELNTMRNRLR	WP_168501874_3	none
31701	WP_168496018	#004080	Anabaena	Type-A lantibiotic	PF04604.13	cc53	Anabaena sp. UHCC 0204	2271	2	20.07	yes	MRITVADIYPHSSEQMLNDLTLEELTNVVGGYRRRRRRGSRYVEPSINLDIDTELESWRTELNTMMEDLRDDFSN	WP_168496018_2	1.00E-05
31703	WP_104387267	#004080	Cuspidothrix	Type-A lantibiotic	PF04604.13	cc53	Cuspidothrix issatschenkoi CHARLIE-1	2236	2	31.52	yes	MWITVSNIDPLTNQQILHDLTMEELTSIVGGYTRRRRNTRSTETPLPRNIDIQLQDWRTELNTMMDDLRKGFGT	WP_104387267_2	1.70E-06
31706	WP_027402982	#004080	Aphanizomenon	Type-A lantibiotic	PF04604.13	cc53	Aphanizomenon flos-aquae NIES-81	2733	5	26.71	yes	MPITVSDIYPLGREQIFNDLSIEELTNIIGGYRSRRGNYRSTETPLSLNIDTQLQDWRTELNTMMDDLRQRFDT	WP_027402982_5	7.60E-06
31710	WP_146082522	#7FFFBF	Rathayibacter	LTXXQ motif family protein	PF07813.12	cc94	Rathayibacter sp. AY2B3	1145	1	75.91	yes	MSAVVGTIDLDAELQVLCDPESSRLAEFTVKFHEFRDSLSPEQRDYLDFIRRAADVAVAEHGKELIEDVDAFEAHISAMLGDDYIAPEMGGIVIRTTVVLKCATWLLKC	WP_146082522_1	8.80E-05
31711	WP_094261964	#7FFFBF	Microbacterium	Domain of unknown function (DUF4456)	PF14644.6	cc94	Microbacterium sp. Yaish 1	1147	1	67.57	yes	MSLILDTVDLDAELQVLCDPESSRLAEFTSKFHEFRNSLTPEERDYLDFIRRAADVAVAEHGRALIEDVDAFEAHISDMLGDEYIAPEMGGIVIRTTVVLKCATWLLKC	WP_094261964_1	5.60E-06
31713	TCK41348	#7FFFBF	Leucobacter	Domain of unknown function (DUF4456)	PF14644.6	cc94	Leucobacter luti	1114	1	19.47	yes	MSPTLEAIDLDAELQVLCDPESSRLAEFTSRFHEFRRSLSPEEQDYLDFIRRAADVAVAEHGTALLNDIDSFEDRISVLLGDEYLVPEMGGIIIRTTVVLRCATWLLKC	TCK41348_1	1.60E-06
31716	WP_109006830	#FF0000	Nostoc	Protein of unknown function (DUF2442)	PF10387.9	cc79	Nostoc commune NIES-4072	2174	1	39.57	yes	MLKDIIAVEPKENYQLHIRFEDDVEGVIDISKIVKFTGVFAPLQDKEYFAKVCVNPEYGTIQWESGADLDPDVIYALITKQPIPQYQLSSVSANSAD	WP_109006830_1	2.30E-24
31717	WP_118166682	#FF0000	Nostoc	Protein of unknown function (DUF2442)	PF10387.9	cc79	Nostoc sphaeroides	2015	2	42.62	yes	MLKDIIAVEPRENYQLHIRFEDDVEGVIDISKIVKFTGVFAPLQDKEYFATVCVNPEYGTIQWESGADLDPDVIYALITKQPISQYQLSAVLANSAD	WP_118166682_2	3.00E-24
31719	WP_094345265	#FF0000	Nostoc	Protein of unknown function (DUF2442)	PF10387.9	cc79	Nostoc sp. Peltigera membranacea cyanobiont 232	2732	1	40.17	yes	MLKDIIAVEPRENYQLHIRFEDEIEGIIDISKIVKFTGVFAPLQDKEYFATVCVNSEYGTIQWESGADLDPDVIYALITKQPIPQYQLSAVSANSAD	WP_094345265_1	4.20E-24
31722	WP_093619522	#B25900	Actinoplanes	Major surface glycoprotein 2 C terminal	PF12373.8	cc96	Actinoplanes philippinensis	6088	2	52.21	no	MNERELLAFVAVAEHGRMDLAAKALGYSQPAVSYQIKCLEMTLGAKLFVRTSSGVTLTRSGALMLPSAQAVLTLMRGIKATTGDLALVA	WP_093619522_2	0.00033
31723	WP_109595189	#B25900	Actinoplanes	Major surface glycoprotein 2 C terminal	PF12373.8	cc96	Actinoplanes xinjiangensis	5437	3	48.98	no	MNERELLAFVAVAEHGRMDLAAKALGYSQPAVSYQIKCLEMTLGAKLFVRTSSGVTLSRTGALMLPSAQAVLTLMRGIKATTGDLALVA	WP_109595189_3	0.00033
31725	WP_106331017	#B25900	Actinoplanes	Bacterial regulatory helix-turn-helix protein, lysR family	PF00126.27	cc96	Actinoplanes italicus	5224	3	39.76	no	MNQRELEAFVRVAELGRMDLAARSLGYSQPAVSYQIKCLEQALGVRLFERNSAGATITRTGALMLPSVKAVLVLMNGIKHTVSSSVRP	WP_106331017_3	5.80E-22
31728	WP_015140719	#8000FF	Nostoc	Ribosomal protein L35	PF01632.19	cc95	Nostoc sp. PCC 7524	4871	3	14.72	no	MPKLKTRKAAAKRFRATGSGKIVRRKAFKNHLLEHKTTNKKRNLSKMAVVNERDEENVRLMLPYL	WP_015140719_3	3.80E-29
31729	WP_017655478	#8000FF	Fortiea	Ribosomal protein L35	PF01632.19	cc95	Fortiea contorta PCC 7126	6443	2	14.12	yes	MPKLKTRKAAAKRFRATGSGKIVRRKAFKNHLLEHKTSNKKRSMSKMALVHERDEDNVRLMLPYL	WP_017655478_2	1.90E-27
31731	WP_103138325	#8000FF	Nostoc	Ribosomal protein L35	PF01632.19	cc95	Nostoc sp. CENA543	3906	8	22.74	yes	MPKLKTRKAAAKRFRATGSGKIVRRKAFKNHLLEHKTTNKKRNFSKMAIVNERDEENVRLMLPYL	WP_103138325_8	1.70E-28
31734	WP_027402982	#C080C0	Aphanizomenon	HicA toxin of bacterial toxin-antitoxin,	PF07927.12	cc64	Aphanizomenon flos-aquae NIES-81	5603	4	29.59	yes	MPKKIRELKNLLLQSGFTYKPAKGSHSKWIHPKLSKAIIIAGKDGSDAKQYLEKQVNEAIVELNKIETEEKEESEE	WP_027402982_4	1.00E-13
31735	WP_148763415	#C080C0	Dolichospermum	HicA toxin of bacterial toxin-antitoxin,	PF07927.12	cc64	Dolichospermum sp. UHCC 0315A	6118	4	28.27	yes	MPKKIRELKNLLLQSGFTCRTGKGSHTNWYHPLLSGRVTISGKDGKDAKEYQEKDVSNAIKRIEEIKKAQEEAQNE	WP_148763415_4	1.30E-13
31737	WP_168645325	#C080C0	Dolichospermum	HicA toxin of bacterial toxin-antitoxin,	PF07927.12	cc64	Dolichospermum sp. UHCC 0259	7385	5	26.39	yes	MPKKIRELKNLLLQSGFTCRTGKGSHTNWYHPLLSGRVTISGKDGKDAKEYQEKDVSNAIKRIEEIKKPQEEAQNE	WP_168645325_5	1.50E-13
31740	ROV70439	#003366	Streptomyces	Peptidase propeptide and YPEB domain	PF13670.6	cc85	Streptomyces globisporus	5143	4	31.03	yes	MNRWIRRSLHGAVLTAALAATAPQAFAADTDQQQPVASSAFGTPPPGYVHEESFYGRAAACQAEGKAGIAEGRWTAYFCYQALPFTPFQELYVKK	ROV70439_4	4.50E-05
31741	WP_060892878	#003366	Streptomyces	Thrombomodulin like fifth domain, EGF-like	PF09064.10	cc85	Streptomyces europaeiscabiei	5968	5	33.95	yes	MTRAIQKAVPGTVLAAMLALGAPEAYAASGGSTTGPEQQPVTSAWTPPEGFIRENSFHGKDVACEKVGRNGIAEGKWRAYICVRVLPFSPFVDLYVKK	WP_060892878_5	1.80E-05
31743	WP_164496180	#003366	Streptomyces	none	none	cc85	Streptomyces sp. ADI95-16	5304	2	37.93	yes	MNRSIRRTLHGAVLASALAATAPQAFAATATQQPSAASSSFGTPPAGYVHEESFHGTAAACQTAGKAGIAAGKWTAYFCFQALPFTPFQELYVKK	WP_164496180_2	none
31746	WP_164394909	#C0FFFF	Streptomyces	none	none	cc69	Streptomyces sp. PRKS01-65	5978	2	6.6	yes	MVRMERQEPTASMNGAWRKGGENVEGLSVRGNRPPFPCACRPVSPGRPHRRARAAAPR	WP_164394909_2	none
31747	WP_052808529	#C0FFFF	Streptomyces	none	none	cc69	Streptomyces cyaneogriseus subsp. noncyanogenus	5723	2	-1.94	yes	MVRMERLELTAPVNRAWQKGGESMEGLPVRSNRPPSTGACRPGSPDRPHRRARAAAPR	WP_052808529_2	none
31749	WP_049976882	#C0FFFF	Streptomyces	none	none	cc69	Streptomyces leeuwenhoekii	5704	3	-3.53	yes	MVRMERLELTAPVNRAWQKGGGSVVRRPVRGNRSPSPGAWHPGSPDRPHRRARAAAPR	WP_049976882_3	none
31752	WP_015140719	#C0FF00	Nostoc	Ribosomal protein L20	PF00453.18	cc72	Nostoc sp. PCC 7524	5095	1	44.08	no	MTRVKRGNVARKRRNKILKLAKGFRGSHSTLFRTANQQVMKALRSAYRDRKKKKRDFRSLWITRINAAAREHGLSYSRLIGNLKKANIQLNRKMLAQLAVLDPASFSKVVEIASQVQG	WP_015140719_1	2.60E-53
31753	WP_103138325	#C0FF00	Nostoc	Ribosomal protein L20	PF00453.18	cc72	Nostoc sp. CENA543	4131	2	45.87	yes	MTRVKRGNVARKRRNKILKLAKGFRGSHSTLFRTANQQVMKALRSAYRDRKKKKRDFRSLWITRINAAARVHGLSYSRLIGNLKKANIQLNRKMLAQLAVLDPAGFSKVVEIASQVQG	WP_103138325_2	1.70E-52
31755	WP_017655478	#C0FF00	Fortiea	Ribosomal protein L20	PF00453.18	cc72	Fortiea contorta PCC 7126	6671	1	51.6	yes	MTRVKRGNVARKRRNKILKLAKGFRGSHSTLFRTANQQVMKALRSAYRDRKKKKRDFRRLWITRINAAARQHGMSYSQLIGNLKKADIQLNRKMLAQLAVLDPASFGKVAELASQARG	WP_017655478_1	6.80E-53
31758	WP_053706403	#808000	Streptomyces	'Cold-shock' DNA-binding domain	PF00313.22	cc87	Streptomyces sp. WM6373	3966	1	56.81	yes	MALGTVKWFNSEKGFGFIEQDGGGPDVFAHYSNIATQGFRELTEGQRVSFDVTQGQKGPQAENIIPA	WP_053706403_1	5.00E-34
31759	WP_055421432	#808000	Streptomyces	'Cold-shock' DNA-binding domain	PF00313.22	cc87	Streptomyces pactum	5874	1	53.13	yes	MSWFAQTARAGVRAVCCAMPEDQDDHLRVRTVRIRYRLKGKGMASGTVKWFNSEKGFGFIAQDGGGPDVFAHYSNINAQGYRELQEGQAVTFDITQGQKGPQAENITPA	WP_055421432_1	7.80E-34
31761	WP_035905443	#808000	Knoellia	'Cold-shock' DNA-binding domain	PF00313.22	cc87	Knoellia subterranea KCTC 19937	6750	2	44.82	yes	MAQGTVKWFNAEKGFGFIAQDGGGPDVFVHYSAIDTQGYRSLDENQQVEFEVTQGPKGPQAEQVRPL	WP_035905443_2	7.70E-35
31764	WP_071187741	#FA8072	Trichormus	none	none	cc88	Trichormus sp. NMC-1	5877	3	-1.18	yes	MVTEYATYRNTTMTYYALGR	WP_071187741_3	none
31765	AGP61345	#FA8072	Streptomyces	Pyrimidine nucleoside phosphorylase C-terminal domain	PF07831.13	cc88	Streptomyces rapamycinicus NRRL 5491	2733	3	45.39	yes	MITTTGTGVPTAMDAYAVGVAAWRLGAGRARKDDAVRAGTGVEPRAKPGDTVAAGQRLLTLPTDTPERFDYAIEALAGAVEIAPEGTEFTPTPIALDRIA	AGP61345_3	4.30E-22
31767	BAZ80283	#FA8072	Sphaerospermopsis	none	none	cc88	Sphaerospermopsis kisseleviana NIES-73	4450	3	1.58	yes	MVTEYATYRNTTMTYYTLGR	BAZ80283_3	none
31769	WP_008180360	#400040	Moorea	Adenoviral fibre protein (knob domain)	PF00541.17	cc86	Moorea producens 3L	4961	1	37.57	yes	MTIVIALLIVGWTAAALIGTQAYFRGEQTKPIHERNWRSDSFNTLAKSVTGQETDYSVRTPAYAMDAFASNSLPNS	WP_008180360_1	3.90E-06
31770	WP_008180360	#400040	Moorea	none	none	cc86	Moorea producens 3L	4403	2	37.56	yes	MTIVIALLIVGWTAAAVIGTQAYFRGEQTKPIHERNWRSDSFNKLAKSVTGQDTDYSVRTPAYAMDAFASNSLPNS	WP_008180360_2	none
31772	WP_008180360	#400040	Moorea	none	none	cc86	Moorea producens 3L	5552	3	34.94	yes	MTIVIALLIVGWTAAALIGTQAYFRGEQTKPIHERNWRSNSFNKLAKSVTGQDTDYSDRTPAYAMDAFASNSLPNS	WP_008180360_3	none
31775	WP_015126776	#40C0C0	Calothrix	none	none	cc66	Calothrix sp. PCC 7507	2210	3	0.58	no	MLQGMMFNPIIFINQHKANKTGHFSPLGLIFFAQILICQDSI	WP_015126776_3	none
31776	WP_086837411	#40C0C0	Nostoc	none	none	cc66	Nostoc sp. RF31YmG	2109	3	-8.43	no	MLFRIHIFIYQHKARKTGCFSWVVIIFFWLNFNHYCLNAR	WP_086837411_3	none
31778	WP_138498765	#40C0C0	Nostoc	none	none	cc66	Nostoc sp. PA-18-2419	2061	3	4.02	no	MTFNVIIFIYHHKAKKTGHFGWLVIIFCLNSHNLYLKALLAGNLCHLQVFGAPNKGYMSGSYESTVL	WP_138498765_3	none
31781	WP_118166682	#0000FF	Nostoc	Domain of unknown function (DUF4160)	PF13711.6	cc80	Nostoc sphaeroides	2312	3	25.99	yes	MPEISRFFGIIITMYYNDHPPPHFHVRYNKQKAIVSIQTLEILEGELTARLFKLVTEWATLHQGELMENWELARDNQTLQKISPLE	WP_118166682_3	3.30E-27
31782	WP_109006830	#0000FF	Nostoc	Domain of unknown function (DUF4160)	PF13711.6	cc80	Nostoc commune NIES-4072	2471	3	24.53	yes	MPEISRFFGIIITMYYNDHPPPHFHVRYNNQKAIVSIQTLEILEGELTARLFKLVTEWAILHQVELMENWELARDNQTLQKISPLE	WP_109006830_3	1.80E-26
31784	WP_094345265	#0000FF	Nostoc	Domain of unknown function (DUF4160)	PF13711.6	cc80	Nostoc sp. Peltigera membranacea cyanobiont 232	3029	2	28.97	yes	MPEISRFFGIIITMYYNDHPPPHFHVRYNNQKAIVSIQTVEILEGELTPRLLKLVTEWATLHQAELMEDWELARDNQTLQKISPLD	WP_094345265_2	1.30E-28
31787	WP_059262025	#B259B2	Streptomyces	Helix-turn-helix domain	PF12840.7	cc92	Streptomyces corchorusii	7025	1	42.08	no	MVILSRYSGTMIAHHPDRDQIRIENVLSALGNPMRLTVVRVLSDGEEHNCGSILDGVSKSSMTHHWRVLRDAGVIWQRPSGRENLLSLRRADLDHRYPGLLDAILDGARSEAGLQRQD	WP_059262025_1	2.30E-14
31788	WP_087811088	#B259B2	Streptomyces	Helix-turn-helix domain	PF12840.7	cc92	Streptomyces sp. CS113	7754	1	44.87	no	MISRHPDRDQIRIEAVLTALGHPMRLTVVRVLNDGEEHNCGSILDGVSKSTMTHHWRVLRDSGVIWQRPSGRENLLSLRREDLDTRYPGLLDAVIEGARLDDESDRASVTS	WP_087811088_1	5.70E-14
31790	WP_103811802	#B259B2	Streptomyces	Helix-turn-helix domain	PF12840.7	cc92	Streptomyces sp. Ru62	7034	1	41.53	no	MIAHHPDRDQIRLENVLSALGNPMRLTVVRVLSDGEEHNCGSILDGVSKSSMTHHWRVLRDAGVIWQRPSGRENLLSLRRADLDHRYPGLLDAILDGARSEAGLQRQG	WP_103811802_1	1.80E-14
31793	WP_031017311	#008000	Streptomyces	none	none	cc82	Streptomyces sp. NRRL WC-3795	7732	3	28.64	yes	MGKIFGTGLTTFVLALLVALPLGTSLTAGGGPSVRASVNGWQ	WP_031017311_3	none
31794	WP_093908736	#008000	Streptomyces	none	none	cc82	Streptomyces sp. cf386	7927	3	20.24	yes	MENRGNTGIAGNTGMTTTKAVMRRGLPVLALALMVALPVSAAVTMEVGGGPSVQVAVNGWQ	WP_093908736_3	none
31796	WP_141310912	#008000	Streptomyces	none	none	cc82	Streptomyces spinoverrucosus	7895	4	16.74	yes	MENRGNTQKTCIGNAVRKGFPALALALLVTLPVSTAVTVQGGPSVQLSVNGWQ	WP_141310912_4	none
31799	WP_084520237	#C0C080	Nocardia	none	none	cc65	Nocardia mexicana	2753	5	11.74	yes	MSAVLIAVVGLLLAFAIYLGVQNAKKS	WP_084520237_5	none
31800	PIR21572	#C0C080	Deltaproteobacteria	none	none	cc65	Deltaproteobacteria bacterium CG11_big_fil_rev_8_21_14_0_20_47_16	4827	3	20.52	yes	MKRLFVLSVLIVCGLCLAAPYAGAKSKKKTQDSSTQPHGGGYYNGEYHIKGKGETGPIFKWDKPINQKAEIKKAYKSPPSKTPSQSTDK	PIR21572_3	none
31802	WP_068028504	#C0C080	Nocardia	none	none	cc65	Nocardia mexicana	3739	5	11.74	yes	MSAVLIAVVGLLLAFAIYLGVQNAKKS	WP_068028504_5	none
31805	WP_138498765	#00FFFF	Nostoc	none	none	cc84	Nostoc sp. PA-18-2419	6132	1	31.21	no	MMKHYILNLNSTAKHEWDRCILRDPLTAKRPDIAKLIAEAVGADTGSYLVSVNIEVQVLEQAAVPQAEQLSLSFPEVSVPSQLREVA	WP_138498765_1	none
31806	OUC15299	#00FFFF	Alkalinema	none	none	cc84	Alkalinema sp. CACIAM 70d	5176	1	24.1	no	MLKHFVLNLNPNAKFDWERCTLQNPITGEQPTIAGLVAQLVGEQPGSYLVAVNLEVTVLEQVPIEPVRSLSRRAIERSIETTINAPEELANPVSAEQRAEIAA	OUC15299_1	none
31808	WP_096537288	#00FFFF	Nostoc	none	none	cc84	Nostoc linckia NIES-25	4230	1	34.79	yes	MMKHYILNLNPTAKHEWDRCILRDPLTAKRPDIAKLIAEAVGADTGSYLVSVNIEVQVLEQAAVPQAEQLSLSFPEVSVPSQLREAA	WP_096537288_1	none
31811	AVH79628	#C0C040	Nostoc	Cytochrome c oxidase subunit IV	PF12270.8	cc68	Nostoc sp. PCC 9201	42	7	15.36	no	MRNTSQLSQFIGVSLGIAAALSFLIGLYLGFKGHSDPRTNIDKTQGEVATVINQS	AVH79628_7	5.00E-06
31812	WP_096679519	#C0C040	Nostoc	Bacterial protein of unknown function (DUF883)	PF05957.13	cc68	Nostoc sp. NIES-2111	799	6	13.44	no	MRDSGYINQFVTVSIGIAAGFAFLIGLYLGVKKISDRSTQSTTSIGQIMPFIDNQ	WP_096679519_6	9.90E-06
31814	AVH79662	#C0C040	Desmonostoc	none	none	cc68	Desmonostoc muscorum PCC 7121	890	5	22.42	no	MTNLRQIDPFMALLLGIAAGAAFLIGLYLGYKEHNDPRTNINQTLEEVIAAIERQPSTFTDNSR	AVH79662_5	none
31816	WP_068150862	#C000C0	Rhodococcus	Sigma NS protein	PF01518.16	cc61	Rhodococcus corynebacterioides NBRC 14404	2947	1	63.48	yes	MSHFTKDVMKFGPAPTLAREIPVAIANLLFSALALAIIYAVSGGVDTMFVVIAAVLVAYSLGRPLYVALRGNRPAHG	WP_068150862_1	8.80E-06
31817	ANI93503	#C000C0	Dietzia	none	none	cc61	Dietzia timorensis	3112	4	26.66	yes	MEHFSKDVMKFTPAPTLAREIPVTIANLLFSIIGIAILIAVSGGVDALVIGFAVVMLGYSLGRTAYVAVRGPRYDKA	ANI93503_4	none
31819	WP_068099584	#C000C0	Rhodococcus	none	none	cc61	Rhodococcus sp. PBTS 1	2925	1	66.18	yes	MSHFTKDVMKFGPAPTLSREIPVAVANLLFSALALAIIYAVSGGADTMFVVIAVVLVAYSLGRPLYVALRGNRPAHG	WP_068099584_1	none
31822	WP_082604641	#00C0C0	Cylindrospermopsis	none	none	cc60	Cylindrospermopsis raciborskii GIHE 2018	1587	1	-3.94	yes	MYTGSIIVSGVNILQDYRVFRII	WP_082604641_1	none
31823	WP_079291565	#00C0C0	Cylindrospermopsis	none	none	cc60	Cylindrospermopsis raciborskii CENA302	1587	2	-5.35	yes	MNGMKTKNSMYTGVSIVSGVNILQGYRVFRII	WP_079291565_2	none
31825	AGP61345	#00C0C0	Streptomyces	Agrobacterium tumefaciens protein Atu4866	PF11512.8	cc60	Streptomyces rapamycinicus NRRL 5491	6518	2	46.03	no	MPHPPHPYVGMWVTADGFIRQELLATGRYDEARGNRKSAYTGSYTVTGNHIDYRDDTGFTATGDVRDGILFHEHLVLYRQGDQRAKGV	AGP61345_2	4.50E-44
31827	WP_017315790	#C0C000	Mastigocladopsis	none	none	cc62	Mastigocladopsis repens PCC 10914	1514	2	16.03	yes	MHAYKTLFIYISLYEQKFKDLASVEQSSIGILAGLFRKNRILVDCANLS	WP_017315790_2	none
31828	WP_008232444	#C0C000	Richelia	none	none	cc62	Richelia intracellularis HH01	1392	3	3.99	yes	MYIAILASITSKNQLLVDFTNL	WP_008232444_3	none
31830	WP_104386798	#C0C000	Cuspidothrix	none	none	cc62	Cuspidothrix issatschenkoi CHARLIE-1	1515	3	-1.49	yes	MANIAILARISGTNRLLVDNSNVS	WP_104386798_3	none
31833	SFK92261	#006400	Amycolatopsis	none	none	cc90	Amycolatopsis sacchari	1426	4	33.63	yes	MRDTRLDLSVSELGANELSVGGLGSIDLSITELESVATPDLSSFLQSVSASAAVSSLIIAT	SFK92261_4	none
31834	WP_125792341	#006400	Amycolatopsis	none	none	cc90	Amycolatopsis sp. WAC 01376	1365	3	24.39	yes	MRTDILDLSVNEITSNELSLGGLKSIDLSITELESAAAPDVASFLGGVSAATAVSALILT	WP_125792341_3	none
31836	WP_093601002	#006400	Lentzea	none	none	cc90	Lentzea waywayandensis	1306	3	41.61	yes	MAKLDLSFDELSPIDLSVAELDRIATPDAGDFITGVSAGATVSTIFISLLT	WP_093601002_3	none
31838	BAU44627	#C0FFC0	Leptolyngbya	Phosphoadenosine phosphosulfate reductase family	PF01507.19	cc58	Leptolyngbya sp. O-77	280	5	14.03	yes	MTNKQLSQHQPAGIDLFLGIEGLSQVLTEENELLITGGRRRNSTPPRRNPRRVVRRRTTRRVVRRRNIFTT	BAU44627_5	4.10E-06
31839	RMF68567	#C0FFC0	Cyanobacteria	none	none	cc58	Cyanobacteria bacterium J069	306	2	11.89	yes	MRNEQLSGFQPAGIDLFLGIEGLAQELTAENELLITGGQRRNSTSARRPRRRVVRRRTTRRVLRRRNISTT	RMF68567_2	none
31841	WP_172358022	#C0FFC0	Thermoleptolyngbya	Phosphoadenosine phosphosulfate reductase family	PF01507.19	cc58	Thermoleptolyngbya sp. PKUAC-SCTA183	418	2	15.47	yes	MTNKELSQHQPAGIDLFLGIEGLAQVLTEENELLITGGRRRNSTPPRRNTRRVVRRRTTRRVVRRRNLSTT	WP_172358022_2	2.50E-06
31844	WP_042619690	#80C0C0	Agrobacterium	Bacterial DNA-binding protein	PF00216.21	cc63	Agrobacterium tumefaciens	7348	1	30.68	no	MNKNELVSAVAEKAGLTKADAASAVDAVFETVQGELKAGGDIRLAGFGSFTVSRREASKGRNPSTGAEVDIPARNVPKFSAGKGLKDAVNS	WP_042619690_1	8.00E-37
31845	WP_067652746	#80C0C0	Agrobacterium	Bacterial DNA-binding protein	PF00216.21	cc63	Agrobacterium bohemicum	7307	1	22.95	no	MNKNELVSAVAEKAGLTKADAASAVDAVFETVQNELKSGGDIRLAGFGSFTVSRREASKGRNPSTGAEVDIPARNVPKFSAGKGLKEAVNS	WP_067652746_1	3.70E-37
31847	WP_112963677	#80C0C0	Rhizobiales	Bacterial DNA-binding protein	PF00216.21	cc63	Rhizobiales bacterium	7354	1	24.33	no	MNKNELVSAVAEKAGLTKADAASAVDAVFETVQSELKAGGDIRLAGFGSFTVSRREASKGRNPSTGAEVDIPARNVPKFSAGKGLKDAVNS	WP_112963677_1	4.60E-37
31850	WP_092614753	#C0FF40	Jiangella	Acyl-CoA carboxylase epsilon subunit	PF13822.6	cc78	Jiangella sp. DSM 45060	5178	2	8.65	yes	MSDEALFRVVRGTPTDEELAALTVVLTAKAAGGPGPAEPPRSAWASYWARRRAPLTPGDGAWRASALPR	WP_092614753_2	9.60E-24
31851	WP_116947187	#C0FF40	Jiangella	Protein of unknown function (DUF3077)	PF11275.8	cc78	Jiangella sp. KE2-3	5172	2	6.9	yes	MSDAPLFRVVKGTPTEEELAALVVVLTARAAGASAPVEPPRSAWASYWTRRPAPLTAGPGSWRASALPR	WP_116947187_2	1.70E-05
31853	WP_069110514	#C0FF40	Jiangella	Acyl-CoA carboxylase epsilon subunit	PF13822.6	cc78	Jiangella alba	5187	2	15.57	yes	MTDAALFRVVRGTPTDEELAALTVVLTAKAAGGQQPAEPPRSAWASYWARRRAPLTPGDGAWRASALPR	WP_069110514_2	6.90E-24
31856	WP_165975342	#FF00C0	Actinomadura	Domain of unknown function (DUF397)	PF04149.12	cc71	Actinomadura sp. H3C3	6550	5	17.83	no	MDLNTATWRKSSHSAGTGGECVEMASVPGLVAVRDSKDPNGPKLIVTRSSFAALVAELKR	WP_165975342_5	2.80E-26
31857	WP_165975342	#FF00C0	Actinomadura	Domain of unknown function (DUF397)	PF04149.12	cc71	Actinomadura sp. H3C3	6170	4	20.46	no	MSLNTSTWRKSSYSSSNGGACVEVADLGDVVGVRDSKEPDGPMLAVTRATFTTLTAKLLQQDASERWT	WP_165975342_4	3.30E-25
31859	WP_165975342	#FF00C0	Actinomadura	Domain of unknown function (DUF397)	PF04149.12	cc71	Actinomadura sp. H3C3	5994	2	26.6	no	MDLNSATWRKSSHSGTQGGSECVEVGDFHETIAVRDSKDLDGPKLIVTRGAFAVLVAELKR	WP_165975342_2	4.60E-23
31862	WP_006619051	#FF80C0	Arthrospira	Uncharacterised protein family (UPF0175)	PF03683.13	cc74	Arthrospira platensis YZ	7149	1	42.56	yes	MSLVISDDLVKASGFSENELLLEIVLMLFQQDKISLGKASELVGLHRMQFQKLISERGICVHYDSDEFQEDLKTLEETEWP	WP_006619051_1	9.20E-26
31863	WP_006622760	#FF80C0	Arthrospira	Uncharacterised protein family (UPF0175)	PF03683.13	cc74	Arthrospira platensis C1	1296	6	29.4	yes	MSLVICDDLVKASGFSENELLLEIVLMLFQQDKISLGKASELLGWHRMQFQKLISERGICVHYDIEEFQEDLKT	WP_006622760_6	4.30E-25
31865	WP_006622760	#FF80C0	Arthrospira	Uncharacterised protein family (UPF0175)	PF03683.13	cc74	Arthrospira platensis C1	1691	4	36.14	yes	MSLVISDDLVKASGFSENELFGEIVLMLFQQDKISLGKASELLGWHRMQFQKLISERGICVHYDIDEFQQDLKT	WP_006622760_4	1.80E-24
31868	WP_012409787	#C0FF80	Nostoc	none	none	cc75	Nostoc punctiforme PCC 73102	2857	7	19.36	yes	MSQPPVYQPNGYEGIVLLLFLAIGSAAFGYIVGKNDKDSYLGRQQQSQHIEQKEANSNSELL	WP_012409787_7	none
31869	WP_073591536	#C0FF80	Phormidium	none	none	cc75	Phormidium ambiguum IAM M-71	3491	6	17.03	no	MSQHCVANTNGYSAVLFFILLILSASFGYVVGKDHKEDYLNQQQTQQIDRGIQNGELES	WP_073591536_6	none
31871	WP_168643398	#C0FF80	Dolichospermum	Alphaherpesvirus tegument protein US9	PF06072.11	cc75	Dolichospermum sp. UHCC 0259	3102	5	31.27	yes	MSQPPVYQPNGYEAMVFFILLLAIGSAAFGYVVGKNDKDSYLDRQQQSQHIEHRETNSNDETPGKK	WP_168643398_5	0.00011
31874	WP_097866484	#FFA500	Streptomyces	none	none	cc81	Streptomyces sp. rh34	7743	3	36.38	yes	MGVCAFTRRMVGTGGMILGLVVGAAAVPAHASAGTGVVSGHGGAATLPWGVSQAVSEGSRAVSGVLCGLPLPKGLGPDRGKPKCVNGWQ	WP_097866484_3	none
31875	WP_107115831	#FFA500	Streptomyces	none	none	cc81	Streptomyces globisporus C-1027	7906	2	49.29	yes	MGVYAFTGKTVATGGLLLGLVLGAAAAPAHATAAPGVGTVAEEAAPRTAGTGAGIGGRGEEIASEVKEAVNRLICGAPLPKPLAPFMGKVKCVNGWQ	WP_107115831_2	none
31877	WP_096622718	#FFA500	Streptomyces	none	none	cc81	Streptomyces sp. WZ.A104	7986	3	36.58	yes	MGVYAFTGRMVGAGGLLLALVVGAAAAPAHASAGAGTVAASATAAPLLTGAGAGAGAGGNAGAGAGAGVGTASEAVSDVVSRVTSAVSRVLCGAPLPKPVGPFMGKVKCVNGWQ	WP_096622718_3	none
31880	WP_051859750	#FFC0FF	Streptomyces	Cofactor assembly of complex C subunit B	PF12046.8	cc70	Streptomyces xanthophaeus	7117	1	49.45	no	MPRLAVFAIVCCVLALAAAVVAFVEGSFLGIVWVLLAGLTSNMAWYYLRKAKADKAAAAARQAS	WP_051859750_1	3.20E-05
31881	WP_095933898	#FFC0FF	Streptomyces	Protein of unknown function (DUF4199)	PF13858.6	cc70	Streptomyces sp. Tue6028	3563	1	40.34	no	MPRLALYALAVCVLSVAAAVVSFAQGSWLGIVWVLLAGLTSNMAWYYLRRARAGRAGSGSVTG	WP_095933898_1	2.40E-06
31883	WP_051715083	#FFC0FF	Streptomyces	Protein of unknown function (DUF4199)	PF13858.6	cc70	Streptomyces sp. NRRL S-475	3695	2	42.87	no	MPRLALYALIVCVLSVAAAVVSFTRGSFLGIVWVLLAGLSSNMCWYYVKRARQQKSVTG	WP_051715083_2	8.00E-07
31886	WP_073619916	#C040C0	Calothrix	Phage spike trimer	PF18715.1	cc67	Calothrix sp. HK-06	1423	1	39.08	yes	MSEKKQEIKLNDLNKRHPAGSEFLKEDEGYLDNLSEEELNARGGADDISVSVGGDVSTSGGDISTSGGDISIGDLR	WP_073619916_1	7.30E-06
31887	WP_096592804	#C040C0	Calothrix	none	none	cc67	Calothrix sp. NIES-2098	1421	1	37.54	yes	MSDKKREIKLNDLNEKRPAGSEFLKKDEGYLDNLSEDELNARGGADDISISAGDYVSSGTYTSTGPGSDVSIGDLD	WP_096592804_1	none
31889	WP_167727925	#C040C0	Tolypothrix	none	none	cc67	Tolypothrix sp. PCC 7910	1423	1	38.78	yes	MSDKKREIKLNDLNKQQGSNEQSPAGSEFMKKDEGYLDNLSEEELNARGGADDISISAGEYVSSGTYTSTGPGSDISIGDLR	WP_167727925_1	none
31892	WP_171084023	#80C0FF	Streptomyces	none	none	cc76	Streptomyces morookaense	1192	2	26.17	yes	MSTEDLMSGFSFHVDAEEFAADAWAAQDMASGNPLTTTFCCSVQCG	WP_171084023_2	none
31893	WP_157777555	#80C0FF	Nocardia	none	none	cc76	Nocardia terpenica	4062	2	11.6	yes	MMKTMTASTQDASVEDLIAGYDFYVSATEFVDSASPARAITASGNPYTTSFCCSAQCC	WP_157777555_2	none
31895	WP_055472496	#80C0FF	Streptomyces	none	none	cc76	Streptomyces pathocidini	1230	2	25.58	yes	MNAEATAEDLMAGFSFHVSGEEFIADLWDGENLASGNPMTTSLCCTAQC	WP_055472496_2	none
31898	WP_051837683	#FF40C0	Streptomyces	none	none	cc77	Streptomyces sp. NRRL F-2580	1120	7	8.94	no	MLCVAGPVPAGGLCQPGICWLGPCWPGPFWFGPFWPGFCQPGMETAVTCGCVGSVGVSSATVAALVVTW	WP_051837683_7	none
31899	WP_052680420	#FF40C0	Streptomyces	Beta defensin	PF00711.19	cc77	Streptomyces sp. NRRL F-4428	1121	6	7.53	no	MLCVAGPVVTGGLCQPGIDWLGPCRLGPCQPGICWLGLCQPGIEAAVTCGSVGSPGVSSATVTAVAVTW	WP_052680420_6	0.015
31901	WP_051700182	#FF40C0	Streptomyces	none	none	cc77	Streptomyces sp. NRRL F-4474	1120	5	13.4	no	MLCVAGPVAADGLCQPGIDGRGPCRLGFCQPGICGLGVCQPGIEAAVTCGSVGSPGVSSATVTAVATTWWMPAGAAERSSESPELLQVATAIPATSPSAVNT	WP_051700182_5	none
31904	WP_141936425	#00FF00	Microbacterium	none	none	cc91	Microbacterium sp. SLBN-154	7305	1	55.58	yes	MAKLEKLLWGDRTDPRRELAEIFPADDASSVVRAQEWARGVVAKAGVATSDELRVIRALRDAEPRLSLKPARYLAAQLNV	WP_141936425_1	none
31905	WP_084890433	#00FF00	Williamsia	none	none	cc91	Williamsia sp. 1135	7455	1	48.59	yes	MSLKNLIVGDHRNPREEIVEVFGTGQGPDAAEAINRAITWAGGVLEAAGIPPNKQVEAIAEIRKAEPRLGLKSATHLASLLKK	WP_084890433_1	none
31907	WP_030169499	#00FF00	Kitasatospora	none	none	cc91	Kitasatospora arboriphila	7516	1	44.11	yes	MSFKDLIVGDHRNPREEIVAVFGEHQGADDPQAIARATTWAQGVLNTAGIPADKQVEAIAEIRRAEPRLGLKSATHLASLLKK	WP_030169499_1	none
31909	WP_116195863	#FF00FF	Microbacterium	none	none	cc83	Microbacterium trichothecenolyticum	1308	2	50.62	no	MSVRYLITVDPDADQGAVEAGLRDAGAESVAPPAPELPDVFIATVDESVADYAERAQAVSGVRVAEPDAWVGFGGEADAEQRDIGLMPAEDLPEERPADDGR	WP_116195863_2	none
31910	WP_045296661	#FF00FF	Microbacterium	none	none	cc83	Microbacterium trichothecenolyticum	1308	2	40.83	no	MPVAAALVRAAARGEDGRVSVRYLITVDPDADQSSVEAGLRDAGAESVAPPAPELPDVFIATVDESVADYADRAQAVSGVRVAEPDAWVGFGGEGGTETRDIGLMPVEEPFGEPPAGDMR	WP_045296661_2	none
31912	KQP70226	#FF00FF	Microbacterium	none	none	cc83	Microbacterium sp. Leaf288	1305	2	39.5	no	MSVRYLITVDPDADQGTIEAGLRDAGAESVSPPAPELPDVFIATVDESVADYADRAQAVSGVRIAEPDAWVGFGGEGGAETRDIGLMPVDEPLEEPPAGDVR	KQP70226_2	none
31915	WP_168880027	#00C0FF	Rhizobium	none	none	cc73	Rhizobium sp. P28RR-XV	144	4	13.77	yes	MAAKKPEKEHSAEAARVRLRNTLWLIINAHGGSFTLNKSHFTDYPGDEYINIETSEDRDANTVTFRATRVEAN	WP_168880027_4	none
31916	WP_018486514	#00C0FF	Rhizobium	none	none	cc73	Rhizobium leguminosarum bv. viciae Vc2	167	4	16.24	yes	MAAKKPAKEHSAEAARVRLRNTLWLIINAHGGSFTLNKSHFKDYPGDEYVNIETSEDRAADTITFRATRVQTN	WP_018486514_4	none
31918	WP_168880029	#00C0FF	Rhizobium	none	none	cc73	Rhizobium sp. P28RR-XV	1590	3	8.77	no	MAAKKPEKEHSAEAARVRLRNTLWLIINAHGGSFTLNKSHFTDYPGDEYINIETSEDRDANTVTFRATRVEAN	WP_168880029_3	none
31921	WP_093601002	#C0C0FF	Lentzea	none	none	cc59	Lentzea waywayandensis	1505	6	30.65	yes	MQNTLQELDLSFQELEVLEGLGNCAGVDQKTCDVLTGTGVSMSVAGITLTIVLT	WP_093601002_6	none
31922	WP_125792341	#C0C0FF	Amycolatopsis	RiPP_CPAC: RiPP peptide	NF033629.0	cc59	Amycolatopsis sp. WAC 01376	1571	1	28.35	yes	MDTSTKPELDLSVQELELMVGLGGNCGGNVDPVACDASLGGAISLSVAFTVAVIT	WP_125792341_1	1.90E-08
31924	SFK92261	#C0C0FF	Amycolatopsis	RiPP_CPAC: RiPP peptide	NF033629.0	cc59	Amycolatopsis sacchari	1656	3	39.68	yes	MNTTEETATGLDLSVQELEVMVGLGGNCGGNVDPNACDASLGGAISLSIAASVILIT	SFK92261_3	4.30E-08
31927	WP_052158149	#EE82EE	Lacinutrix	Poliovirus 3A protein like	PF08727.11	cc89	Lacinutrix jangbogonensis	1663	1	31.77	yes	MANSNCCWIIVATTGCSTDVNTEKASAVAQKSAPDDCCWIVLATTGCSTEVQSTSAEASLARKNAVADDCCWIVLATTGCSTDAETTKLVQKKTADSCCWIVVATTGCST	WP_052158149_1	0.0053
31928	WP_141683807	#EE82EE	Rhizobium	none	none	cc89	Rhizobium sp. AC27/96	1280	1	21.03	yes	MTTKDCCWILVATTGCSTADFAAAKSPAPNGCCWIILATTGCSTDAATAESSSALRQSVADDCCWIVLATTGCSTDAATAKLHSAAPQANKANDCCWIILATTGCST	WP_141683807_1	none
31930	WP_153354547	#EE82EE	Rhizobiales	none	none	cc89	Rhizobiales bacterium RZME27	1203	2	27.6	yes	MTSKNCCWIIVATTGCTTDNVAAVAAPSESCCWIVLATTGCSTDDVTVSNAITAHTSVEDDCCWIVLATTGCSTDASTVNALQGSRKSVAGDCCWIVLATTGCST	WP_153354547_2	none
31933	WP_051700182	#FFC0CB	Streptomyces	none	none	cc93	Streptomyces sp. NRRL F-4474	1116	3	53.27	yes	MSKSAAAKERAKKRSVYVFTALGLVAGIAVATWSNSGDSEDRSAAPAGIHHVVATAVTVADETPGEPTEPQVTAASIPGWQTPNPQIPGWQNPSRQGPRPSIPGWQSPSAATGPATQSI	WP_051700182_3	none
31934	WP_052680420	#FFC0CB	Streptomyces	none	none	cc93	Streptomyces sp. NRRL F-4428	1117	5	41.45	yes	MSKSATARERSKKRSVYVFTALGLVAGIAVATLTGSGDSEDRSAAPAGIHQVTATAVTVADETPGEPTEPQVTAASIPGWQSPSQQIPGWQGPSRQGPSQSIPGWQSPPVTTGPATQSI	WP_052680420_5	none
31936	WP_051837683	#FFC0CB	Streptomyces	Transmembrane protein 100	PF16311.5	cc93	Streptomyces sp. NRRL F-2580	1116	2	58.12	yes	MTKSATAKERSKKRSVYVFTVLGLVAGIAVATLTNSGDSEDRSAAPAGIHQVTTSAATVADETPTEPTQPQVTAVSIPGWQNPGQKGPNQKGPGQQGPSQQIPGWQSPPAGTGPATQSI	WP_051837683_2	2.40E-06
31939	WP_068150862	#C0C040	Rhodococcus	none	none	cc146	Rhodococcus corynebacterioides NBRC 14404	7190	4	20.69	yes	MAALTSTTRPQVQDTDTTVAAPDEAELVRLAGAGAARAGRVRGSVPIGLPTTTCPTWSCV	WP_068150862_4	none
31940	WP_068099584	#C0C040	Rhodococcus	none	none	cc146	Rhodococcus sp. PBTS 1	7171	4	19.64	yes	MAALTSTTRPQVQDTDTTLAAPDEAELVRLAGAGAARAGRVRGSVPIGLPTTTCPTWSCV	WP_068099584_4	none
31942	WP_086820178	#408040	Allokutzneria	none	none	cc107	Allokutzneria sp. NRRL B-24872	6723	2	47.39	yes	MVGGVLRQVSESGGDSGWLASKFGQRYGRWEARVRSQATSANSVRKCIRCAPSTHQTIQLDNFHGSTMQSAVHEVDWTGSYSLTG	WP_086820178_2	none
31943	WP_086820173	#408040	Allokutzneria	none	none	cc107	Allokutzneria sp. NRRL B-24872	2386	2	47.39	yes	MVGGVLRQVSESGGDSGWLASKFGQRYGRWEARVRSQATSANSVRKCIRCAPSTHQTIQLDNFHGSTMQSAVHEVDWTGSYSLTG	WP_086820173_2	none
31945	WP_013190653	#40FFFF	Trichormus	Essential protein Yae1, N terminal	PF09811.9	cc109	Trichormus Nostoc azollae 0708	6497	2	21.19	no	MQQSAIYQDILQKGKWEGKQEGLQIGKQEGKQEAEVLLILRLVSHRFGTVEPQIEERMNQLSTTQYRKFSRSTFRFL	WP_013190653_2	5.80E-06
31946	WP_062294404	#40FFFF	Nostoc	Tetracyclin repressor-like, C-terminal domain	PF13305.6	cc109	Nostoc piscinale CENA21	7204	1	45.76	yes	MQESVIYQDILQKGLQQGEARGKRQEALGLILRLLTRRFGAVELQTEQQIQTLSINQLEDLAEALLDFTSQNDLVNYLANLSVSS	WP_062294404_1	1.60E-05
31948	WP_096583741	#FF0000	Anabaenopsis	Psb28 protein	PF03912.14	cc157	Anabaenopsis circularis NIES-21	6522	2	40.94	no	MAKIQFSRGLDENVLPDVRLTRSRSGDTGTATFIFTNPKILDQGSTEEVTGMYMLDEEGEIITREVKARFVNGKAEALEAVHIMKSVDEWDRFIRFMERFAQANGLEFSKS	WP_096583741_2	9.80E-49
31949	WP_015111489	#FF0000	Nostoc	Psb28 protein	PF03912.14	cc157	Nostoc sp. PCC 7107	6558	1	37.81	no	MAKIQFSRGLDENVLPDVRLTRSRSGDTGTATFIFTNPKILSQSSSEEVTGMYMLDEEGEIITREVKARFVNGKAEALEAVHIMKSADEWDRFIRFMERFAQANGLEFSKS	WP_015111489_1	6.30E-49
31951	BAZ86949	#FF69B4	Dolichospermum	none	none	cc104	Dolichospermum compactum NIES-806	7782	2	34.51	no	MSIQGTPPTVPQTALAALVDAFIKQGHPSQYAQAMATSIIFQTDLDLRNAQLANLLGWLKEEHHDIYPLALSVVEKTCSDFERQVQEG	BAZ86949_2	none
31952	WP_137908690	#FF69B4	Dolichospermum	none	none	cc104	Dolichospermum planctonicum	7322	1	40.11	no	MSTEGNPANVPQEALTALVDTFVQKGHPRQYAEAMATSIIFQTDLDLRNAQIANLLGWLKQEHNDIYPLALDVVGKTSAEFERRVRQG	WP_137908690_1	none
31954	WP_168880029	#800000	Rhizobium	none	none	cc98	Rhizobium sp. P28RR-XV	4308	2	12.24	no	MTRHEMIIYMVCSQQCWPTENYAPAPMVRAFSGANLLSRTTDISAITPASTAPDTLGLTTVAAIGGQPDASLHKTP	WP_168880029_2	none
31955	WP_168880027	#800000	Rhizobium	none	none	cc98	Rhizobium sp. P28RR-XV	7310	2	17.24	yes	MTRHEMIIYMVCSQQCWPTENYAPAPMVRAFSGANLLSRTTDISAITPASTAPDTLGLTTVAAIGGQPDASLHKTP	WP_168880027_2	none
31957	WP_094261964	#C040C0	Microbacterium	none	none	cc145	Microbacterium sp. Yaish 1	1252	2	11.02	no	MSLEGVDVLDERSTVLCDGDVGRATDEVEVVALLRRERVAELVELGREFSQPAALRVAQHLELGVEIDGVKNE	WP_094261964_2	none
31958	WP_146082522	#C040C0	Rathayibacter	none	none	cc145	Rathayibacter sp. AY2B3	1250	3	7.08	no	MRLERVDVFDQLLAVLGDSDVGGAADEVEVVALLRRERVAELVELHRELGESAALRVAEDLEFGVEVDGAHNCRHEFSFAEVP	WP_146082522_3	none
31960	WP_069110514	#804080	Jiangella	none	none	cc134	Jiangella alba	1108	3	-11.37	no	MIDAITIGARPSSVVSARSATSADSAACSAGVPKRF	WP_069110514_3	none
31961	WP_116947187	#804080	Jiangella	none	none	cc134	Jiangella sp. KE2-3	1116	3	-11.29	no	MIDAITIGARPSSVVSAARSATSADSAACSAGVPKRF	WP_116947187_3	none
31963	WP_051642643	#FF40FF	Streptomyces	YtxH-like protein	PF12732.7	cc110	Streptomyces sp. CNQ-525	2041	1	61.58	yes	MRYRVSFVAGIAVGYVLGSRAGRERYEQLRKAAQQFSESPAVRNAAEAAALTSRDAVTKAASSLSTKFADVVPENVAARVHFLHGNGHANGSRGRRDEPDDWGTTNT	WP_051642643_1	2.50E-07
31964	WP_047015652	#FF40FF	Streptomyces	YtxH-like protein	PF12732.7	cc110	Streptomyces sp. CNQ-509	790	1	63.84	yes	MRYRVSFVAGIAVGYVLGSRAGRERYEQLRKAAQQFSESPAVRNAAEAAALTSRDAVTKAASTLSTKFADVVPENVASRVHFLGSGHANGTRGRREESDDWGTTNT	WP_047015652_1	3.00E-07
31966	WP_118166682	#FF0040	Nostoc	Iron-containing outer mitochondrial membrane protein N-terminus	PF10660.9	cc189	Nostoc sphaeroides	4841	5	9.89	yes	MESPFLSILTLVAVVLLVVVTGGIGYLTVADWRDRRRRDDDKRTSRSATPKRR	WP_118166682_5	1.40E-05
31967	AFY52807	#FF0040	Rivularia	GspL periplasmic domain	PF12693.7	cc189	Rivularia sp. PCC 7116	6389	5	16.28	yes	MEGPFLNILALSALVLLVAVTGGVIYLTLMEWRDRRLLEQEKREMRRSSPKQR	AFY52807_5	8.00E-06
31969	RCJ31639	#80C0C0	Nostoc	Protein of unknown function (DUF2283)	PF10049.9	cc141	Nostoc minutum NIES-26	4190	1	44.21	yes	MDAKLIFEYDRNGDILYINKCSPYPEQESEEIEYGIVARLNPSTGEIENLEILFFSKRLSEKTLFELPVIADLRLATASL	RCJ31639_1	5.10E-12
31970	WP_087542717	#80C0C0	Nostocales	Protein of unknown function (DUF2283)	PF10049.9	cc141	Nostocales cyanobacterium HT-58-2	6593	6	15.93	no	MHAKLHFEYDRSADTLYINKLPPYPEQEPAEIEYGVIARLNPTTGAIENLEILFFSERLSEKPLLELPLLADFHFVPTA	WP_087542717_6	4.40E-10
31972	WP_110256027	#400080	Undibacterium	Domain of unknown function (DUF1843)	PF08898.10	cc124	Undibacterium pigrum	1489	1	33.5	no	MVSPTNIAPTAALYGVPIHEAIASGDLSKIVAIRNQALDYLAAASEIERLLPSLESAMKAKGLPPQALYGVAIQDAVTRGDQAEIARLKAQVAYYSRLF	WP_110256027_1	1.50E-14
31973	WP_162060722	#400080	Undibacterium	Domain of unknown function (DUF1843)	PF08898.10	cc124	Undibacterium sp. KW1	1471	2	32.47	no	MVSPTHAAPLAALYAVPMHEAIASGDVKKMSTVRDQALDYLAAASEIERLLPSLETAMKAKGLPPQALYGVAIQDAVTRGDQAEISRLKAQVAYYNRLF	WP_162060722_2	1.50E-14
31975	WP_052752730	#400080	Kordia	none	none	cc202	Kordia zhangzhouensis	6787	2	50.83	yes	MRHDVLQKFLYKTEDSGRFLVTSKRTGVTYFVEPIDSGKPTNLWGDLDPATKKLTGDYGNKRRGAVLAEESLITEENGFQNISIFKGSPLGEIDRRDQLYATTKGI	WP_052752730_2	none
31976	WP_108116368	#400080	Kordia	none	none	cc202	Kordia periserrulae	5225	1	51.56	yes	MRKEVLQRFLYKTEDSGRFLVTSKHTGVTYFVEPIDAGKPAKLWGDIDPATKKMTGDYGNKRRGAVLPENSLITEENGFQNISIIKGSPLGEIDRRDRLYELNDT	WP_108116368_1	none
31978	WP_049802506	#000040	Gloeothece	Yeast longin domain	PF18639.1	cc120	Gloeothece verrucosa PCC 7822	1731	3	-0.02	yes	MGEGLKENILGLLIFLKKLAESIKFRYVRDPIIILIR	WP_049802506_3	5.80E-06
31979	WP_013321440	#000040	Gloeothece	Yeast longin domain	PF18639.1	cc120	Gloeothece verrucosa PCC 7822	4	2	-0.02	yes	MGEGLKENILGLLIFLKKLAESIKFRYVRDPIIILIR	WP_013321440_2	5.80E-06
31981	BBD66616	#408000	Nostoc	none	none	cc130	Nostoc commune HK-02	2782	4	28.66	yes	MLIKNIIVQASPITPAEIFRTAAPCAAKGCQHFDGQDCRGAMRIVEKLPPVAEELPPCSIRRDCRWWQQEGKAACMRCPQVITDNYNASELAVQVATPIFG	BBD66616_4	none
31982	WP_006197379	#408000	Nodularia	none	none	cc130	Nodularia spumigena CCY9414	189	1	34.36	yes	MTEPRVAYLKQPQTMTEELIAKVSPVNPAEVFRTASTCATNNCQHFDGKDCGLVTRIVAQFPIALEELPPCSIRRDCRWWQQEGKAACMRCPQVITDNYNASELMIQVATPTVS	WP_006197379_1	none
31984	WP_096604516	#FF8040	Calothrix	none	none	cc114	Calothrix sp. NIES-2100	1509	1	10.61	yes	MDLICRLPKLETALEQNTQPPLLISTYVTRLVNVKIEQCNQTVCKGTVKDVVAFWQVFVSDIGYY	WP_096604516_1	none
31985	WP_086837411	#FF8040	Nostoc	zinc-ribbon domain	PF13248.6	cc114	Nostoc sp. RF31YmG	1629	1	-3.5	yes	MNKIINFSCVFCDWKIEPDQNTQPKQLIYTYVTLLRNVKIE	WP_086837411_1	6.90E-06
31987	WP_089505437	#B259B2	Streptomyces	none	none	cc170	Streptomyces sp. NBS 14/10	3283	2	32.41	yes	MGGLLPFLMVVGSLAMVMAFFTWLAVLVRRRGVAGSAFRSIVDVYDQAWHATGHDSHYEIQVQAERKLPIPSPDDPWRPDHGMITRPASPSRGGARPVPR	WP_089505437_2	none
31988	WP_014173637	#B259B2	Streptomyces	none	none	cc170	Streptomyces milbemycinicus	2285	1	29.14	yes	MGELLPFLMVVASLAVVMGFFTWLAVLVRRRGVAGSAFRSIVDVYDQAWHATGHDSHYEIQVQAERKLPIPSPDDPWRPDRGATARPGERGGRPVPSRPRPGRRGLGRRRMWRRR	WP_014173637_1	none
31990	WP_156664522	#C0FF40	Mycobacterium	Domain of unknown function (DUF4383)	PF14325.6	cc156	Mycobacterium sp. 852002-51057_SCH5723018	3618	1	32.97	no	MVRAPRWYCVVVGMFLAVRAVSTLAAGGNFGLPGDGWRAVWQLTLVVLLMIGAAEPRAAWPAAATVGAVYAVATGLEAFHGADLLGVVPVDMRDRIVHPLLAILAAASLLLAWRRADAVS	WP_156664522_1	0.013
31991	WP_156664522	#C0FF40	Mycobacterium	Domain of unknown function (DUF4383)	PF14325.6	cc156	Mycobacterium sp. 852002-51057_SCH5723018	75	2	24.37	no	MVRASQWYCVVVGLFLAVRAASTLAVGANFELPGNGWRAIWQLVLAALMLIGVARPRAAWPSVAVVGVVYAVATGLDAFHGDDLFGIVPVDMRDGIVHPLLAIVAALTLLLAWRRADAVT	WP_156664522_2	0.0071
31993	WP_079291565	#0080FF	Cylindrospermopsis	none	none	cc177	Cylindrospermopsis raciborskii CENA302	3964	3	-9.62	no	MDCNILVLLLIILQVLLVQISIFWDLGL	WP_079291565_3	none
31994	WP_082604641	#0080FF	Cylindrospermopsis	none	none	cc177	Cylindrospermopsis raciborskii GIHE 2018	3863	3	-8.36	no	MDCNILILLLVLLQVLLVQISIFWELGAIRTIKFQYRIRW	WP_082604641_3	none
31996	WP_128453384	#FF8040	Sphingomonas	none	none	cc192	Sphingomonas sp. UV9	6908	1	46.73	no	MTDIDKSALDSLSVAPDDTDAEEKSSGRDPRQEAGQDKSIGKRLQKNPDSVDARLDNGLDESMDGSDPLSATQPGSNREPAKSSGYDEDAERALREKQA	WP_128453384_1	none
31997	WP_107961734	#FF8040	Sphingomonas	none	none	cc192	Sphingomonas sp. PP-CE-3G-477	6974	1	47.91	no	MTDIDKSALDSLSVAPDDKDAEGKSSGRDPRQEAGQDKSIGKRLQKNPDSADARLDNGLDESMDGSDPISATQPGSGTEPAKSSGYDEDAERALREKQA	WP_107961734_1	none
31999	WP_015207763	#FF4040	Cylindrospermum	none	none	cc178	Cylindrospermum stagnale PCC 7417	3943	2	20.64	no	MDMEDADMEATVMEAIGMEATDMEGAGRVANGGFTTGVVPINQGTTRPPIETGLLALQLLDPRHL	WP_015207763_2	none
32000	WP_015207767	#FF4040	Cylindrospermum	none	none	cc178	Cylindrospermum stagnale PCC 7417	7862	2	20.64	no	MDMEDADMEATVMEAIGMEATDMEGAGRVANGGFTTGVVPINQGTTRPPIETGLLALQLLDPRHL	WP_015207767_2	none
32002	WP_102116354	#C000C0	Pectobacterium	none	none	cc139	Pectobacterium aquaticum	1207	1	0.95	yes	QVVGCNGGAQAQTYFPSIGHCAAAQAQTPPITHPQDCGVSWNCATKPPKA	WP_102116354_1	none
32003	WP_110163988	#C000C0	Pectobacterium	Protein of unknown function (DUF1552)	PF07586.11	cc139	Pectobacterium carotovorum subsp. carotovorum	1176	1	12.47	yes	TQVVGCNGGAQAQTYFPSIGHCAAAQAPAQAQFPTLSLQCAQVTTGLLTQVVGCNGGAQAQTYFPSIGHCAAAQAQTPPITHPQDCGVSWNCSTKQPNAQTYFPSIGSC	WP_110163988_1	1.20E-05
32005	WP_075895564	#FF0040	Moorea	F-box associated	PF07734.13	cc111	Moorea bouillonii PNG	6310	1	36.5	yes	MTPSSSHHTVRRGRVFPEKRLSPEEKARIQAEDAVFYKRCREVFERVQPELIQEHYDWFIIIEPDSGEYFIDEDKKVALSKSRSKHPGKKCIIMQINETGTCGRI	WP_075895564_1	3.50E-06
32006	BAZ30575	#FF0040	Cylindrospermum	Dipeptidyl peptidase IV (DPP IV) N-terminal region	PF00930.21	cc111	Cylindrospermum sp. NIES-4074	6464	2	46.84	yes	MTETKSNRVARRGRLFPEIQWTEEQKNLYISELENHHQRCRVIFERLQPELIKTHHNWFMAVDAESGDYFINQDEEVVTQMCVEKYPKAIPFIFVINETGVAGRI	BAZ30575_2	4.50E-06
32008	WP_120754718	#C0C000	Streptomyces	none	none	cc140	Streptomyces klenkii	7781	4	27.19	yes	MTGKFAKKAAAVLVPGAFLGAFALPGTAMAAPAAPVAADVHAVSAVHGLCGIPVKLVDRLPVCHRVNGWQ	WP_120754718_4	none
32009	WP_058047489	#C0C000	Streptomyces	Male Flower Specific protein 18	PF17352.2	cc140	Streptomyces sp. MBT76	7938	4	25.14	yes	MKTGNLAKKAAAVLVPGVSLMVFALPGTAAAASAPAEVRAVHGLQGLHVLQGLQGLQGLCGIPAKVVDRLPVCHRVNGWQ	WP_058047489_4	1.20E-06
32011	RCJ25433	#FF4040	Nostoc	none	none	cc100	Nostoc sp. ATCC 43529	5674	2	24.81	no	MISPNLLEIERSIRALSVEEQLWLLESIAREIREREYTKDKFADVKPPQEELIEIASEPIIQTKFSLINDEFASSEIL	RCJ25433_2	none
32012	WP_073642495	#FF4040	Nostoc	none	none	cc100	Nostoc calcicola FACHB-389	3885	1	19.71	no	MISPNLLEIERSIRALSVEEQLWLLESIAREIREREYTKDKFDDAKSPPEKLVEIASESTVPIKFSVNNDEFASSEIL	WP_073642495_1	none
32014	WP_087103312	#408080	Nocardiopsis	none	none	cc133	Nocardiopsis sp. JB363	6576	2	40.39	yes	MNQSANIFGDIELLSTAGAQAAQEDMSVTLDEGVDAPTSVPCGITISITLDC	WP_087103312_2	none
32015	WP_067598320	#408080	Nocardiopsis	none	none	cc133	Nocardiopsis listeri NBRC 13360	6521	2	40.94	yes	MNQSANIFGDIELLSTAGAQAAQEDMSVTLDEGVDAPTSVPCGITISITLDC	WP_067598320_2	none
32017	WP_006195640	#EE82EE	Nodularia	none	none	cc167	Nodularia spumigena UHCC 0039	6034	3	39.89	yes	MAKIEIYNLYPSNEQQLLNEITEGEIKTVEGREGSTVTAGNSDINEQPLGNTVDQNLDNLLYRLRNQMGIVIFGARNQFNERLNSF	WP_006195640_3	none
32018	WP_089091039	#EE82EE	Nodularia	Type-A lantibiotic	PF04604.13	cc167	Nodularia sp. NIES-3585	4587	6	25.58	yes	MARIEIDDLYPSNNQKLLNEITDREMQTVEGREGNTVTAGISDVNEQSLTHMLEQNIDNLLFHLRSQMGVVILGARNQFNQGFSSF	WP_089091039_6	8.60E-06
32020	WP_008180360	#4000FF	Moorea	Protein of unknown function (DUF2949)	PF11165.8	cc196	Moorea producens 3L	5794	7	14.0	yes	MQSSVLTKLIRWLQEELEIPRASIALALRQGEPSPNFLPMILWQYGLISLDQLDQIFDWLEAV	WP_008180360_7	4.60E-32
32021	WP_096605992	#4000FF	Calothrix	Protein of unknown function (DUF2949)	PF11165.8	cc196	Calothrix sp. NIES-2100	3691	7	10.37	no	MVIRNSDKQFLNFLHNELELSSADISVALRHQQMDNGPLPMLLWQYGLVDLEQLERIFDWLYEQS	WP_096605992_7	1.90E-32
32023	TKB91729	#FF40FF	Nitrospira	none	none	cc188	Nitrospira sp.	7309	6	12.48	yes	MQQTHGIEAVPRITGHHMILDALSRHTRSSIRALQTFLGIAILAGSCTLPITSLIFAPKLFDQGAVIRTKVDEQLNAATGVLVAIAGNLLGKTTKSPGTGQKPDATGTM	TKB91729_6	none
32024	TKB91729	#FF40FF	Nitrospira	none	none	cc188	Nitrospira sp.	3413	3	19.14	yes	MYHSNHLNSMEQTQGVEMVPGITDHQMILDTLSHPLQSPIRALQTFFGIALLAGSCSLPITTSLLFAAELFNQGAMIRAKVDEQLTAATGILGAIAGYLFGKEAKGPEAKQKSGEAGTT	TKB91729_3	none
32026	WP_155387558	#8000FF	Catellatospora	MerR HTH family regulatory protein	PF13411.6	cc173	Catellatospora paridis	5067	1	11.67	yes	MFGDENYPAYTMGRAAEIIGATPDFLRKLDELKLINPLRSSGGHRRYSRYQLRLAARAREMVDQGTAVEAACRIIILEDRWSIRAPLWKPRAGSSSSRTNSKKPSARTSSAQPTDLPGR	WP_155387558_1	1.30E-12
32027	WP_051837683	#8000FF	Streptomyces	none	none	cc173	Streptomyces sp. NRRL F-2580	3907	6	17.51	yes	ARELVDQGTPIEAACRIIILEDQLEEAQRINAEYRRAAESSAPPPSA	WP_051837683_6	none
32029	WP_093619522	#C0FF00	Actinoplanes	none	none	cc150	Actinoplanes philippinensis	4949	6	32.6	yes	MTKNSRHLVMPTILAAAAIAFTGTQITAPQPTTSATGTTQPVVVPTDLPGVPLDPKQPITHDWPW	WP_093619522_6	none
32030	WP_109595189	#C0FF00	Actinoplanes	none	none	cc150	Actinoplanes xinjiangensis	4289	6	34.55	yes	MTKNPRHLVMPTILAAAAIALTGAQLAAPHVTASATGTTPPPVILPTDGPGVPTDPKQPITNDWPW	WP_109595189_6	none
32032	WP_016898474	#FF40C0	Staphylococcus	none	none	cc155	Staphylococcus capitis	1139	2	1.62	yes	MVVHHQYLRPFLIQLLGVPLNAVNQ	WP_016898474_2	none
32033	WP_030061393	#FF40C0	Staphylococcus	none	none	cc155	Staphylococcus capitis	1144	3	-1.0	yes	MVVHHQFLHPFLIQLLGVQLNAVNHQ	WP_030061393_3	none
32035	WP_026723183	#FF80C0	Fischerella	Minor capsid protein VI	PF02993.14	cc152	Fischerella sp. PCC 9431	7079	3	4.97	no	MRRTLEGTNRKRKRTSGFRARMRTPDGRNVIRARRKRGRYRLSV	WP_026723183_3	0.00032
32036	AYJ47579	#FF80C0	Rhodococcus	Ribosomal protein L34	PF00468.17	cc152	Rhodococcus sp. P1Y	4002	1	10.89	yes	MGVYKFRGVLTVAKGKRTFQPNNRRRARVHGFRLRMRTRAGRAIVSARRGKGRKELTA	AYJ47579_1	2.80E-23
32038	WP_096576751	#404080	Aulosira	none	none	cc108	Aulosira laxa NIES-50	5679	3	-2.18	no	MLNLYQYLCLIIKLKESQQAFSLNQTGCL	WP_096576751_3	none
32039	WP_096576757	#404080	Aulosira	none	none	cc108	Aulosira laxa NIES-50	2604	3	-2.18	no	MLNLYQYLCLIIKLKESQQAFSLNQTGCL	WP_096576757_3	none
32041	WP_015078657	#592C00	Anabaena	none	none	cc175	Anabaena sp. 90	7474	8	29.2	no	MQIKEMTAEQLQNLIRTTVDEMLDEYFGDPDEDKEIKESFKQSLLEIRRKRQEGRPTIPLAEVYKRYGIER	WP_015078657_8	none
32042	TAE59458	#592C00	Nostocales	RiPP_CCRG-2: CCRG-2 family RiPP	NF033456.1	cc175	Nostocales cyanobacterium	11155	9010	33.56	yes	MQVNELTIEQLKDLIRETVRETIEELLTDPDTNQTIKDNFKQELLAIRKRRETGVRGISTAEVMQRLGLENR	TAE59458_9010	1.10E-06
32044	WP_006622760	#80C0FF	Arthrospira	none	none	cc154	Arthrospira platensis C1	6688	12	19.76	no	MKTYSASGDRTVVGYITGKKGQYEVFHRSPKSHDLYFYDSFMNRSTGFRVNSNGNYIGPDGAAYYNNPSVIAAIQNRYNLGKYS	WP_006622760_12	none
32045	WP_006622760	#80C0FF	Arthrospira	none	none	cc154	Arthrospira platensis C1	6969	11	20.12	no	MRTYSASGDRTVVGYITGKNGQYEVFHRTTKDLFFQNTAGGVRTGFRVHSNGKYVAPDGTIYHNNSSIIAAIQNKYDLGRYSG	WP_006622760_11	none
32047	WP_155752488	#808040	Scytonema	Domain of unknown function (DUF5082)	PF16888.5	cc132	Scytonema sp. UIC 10036	7320	3	21.8	yes	MFPFSFWYNNSCYGGETVSRKTRLERKLKFLKTMRDDLETKIAGLNAAISNVEQQLTQEDVTQV	WP_155752488_3	4.10E-06
32048	WP_017743137	#808040	Scytonema	Domain of unknown function (DUF5082)	PF16888.5	cc132	Scytonema hofmannii PCC 7110	5197	4	18.91	yes	MFPFSFWYNNSCYGGETVSRKARLESKLKFMKTMRDDLETKLAGLNAAISNVEQQLNQEDVTQV	WP_017743137_4	6.40E-06
32050	AOX46105	#C0FFC0	Microbacterium	Stage III sporulation protein AC/AD protein family	PF06686.11	cc136	Microbacterium sp. BH-3-3-3	3560	4	14.4	yes	MSTSSFTALARVSGILASLIGLVGAIVLFVLGQPLLSAVFAVFAIAGVGTIAVAPRRGR	AOX46105_4	1.70E-06
32051	WP_008380405	#C0FFC0	Gordonia	Domain of unknown function (DUF3483)	PF11982.8	cc136	Gordonia malaquae NBRC 108250	3226	1	27.76	no	MKVPVVAGLLAAVIFAIVAIILAVQSQLALAAVFGVLVLAALGTIPVATRSEQK	WP_008380405_1	2.60E-06
32053	WP_124155194	#004040	Okeania	none	none	cc181	Okeania hirsuta	5574	3	2.88	no	MPQQFNVTAESNGHKPLETDLIKLEKSSRLG	WP_124155194_3	none
32054	WP_124142959	#004040	Okeania	none	none	cc181	Okeania hirsuta	2100	2	2.77	no	MPQQFNVTAESNGHKPLETDLIKLEKSSRLG	WP_124142959_2	none
32056	WP_073619916	#C0FFFF	Calothrix	Type-A lantibiotic	PF04604.13	cc147	Calothrix sp. HK-06	4090	3	35.36	no	MNNATNTNAVELSFDELDTVAGGLAISLGDIKGFASDASNSFSQKNLGVAQQTFAGLSGSYTASVVQLQDIKSDAGQAIAISF	WP_073619916_3	1.80E-05
32057	WP_073619916	#C0FFFF	Calothrix	Type-A lantibiotic	PF04604.13	cc147	Calothrix sp. HK-06	4434	2	38.09	no	MQNEINNAVELSFDELDTVAGGLAISLGDIKGFASDASNSFSQKNLGVGQQTFAGPGGSYTGSVTSLQDIFSNAGQAIAAK	WP_073619916_2	2.60E-05
32059	WP_089126833	#004000	Tolypothrix	Protein of unknown function, DUF485	PF04341.12	cc200	Tolypothrix sp. NIES-4075	2375	3	11.52	no	MDDRTKALQSLAAERWRVSLILSGVMMFIYFGFILLIAFNKPLLGSLVVPGLSLGILLGALVIISAWVLIFIYVRWANNNYDRKVARLTQK	WP_089126833_3	2.40E-29
32060	WP_089126836	#004000	Tolypothrix	Protein of unknown function, DUF485	PF04341.12	cc200	Tolypothrix sp. NIES-4075	5737	3	11.52	no	MDDRTKALQSLAAERWRVSLILSGVMMFIYFGFILLIAFNKPLLGSLVVPGLSLGILLGALVIISAWVLIFIYVRWANNNYDRKVARLTQK	WP_089126836_3	2.40E-29
32062	WP_017311237	#FF00FF	Mastigocladus	YCF9	PF01737.17	cc161	Mastigocladus laminosus UU774	4858	3	13.87	yes	MSIIFQIALLALVLVSFAMVIGVPVAYATPQNWNDSKKLLWLGSGTWIGLVVLVALLSFFVV	WP_017311237_3	3.00E-32
32063	WP_016863105	#FF00FF	Fischerella	YCF9	PF01737.17	cc161	Fischerella muscicola SAG 1427-1 = PCC 73103	4993	2	18.79	yes	MSIIFQIALLALVLVSFAMVIGVPVAYATPQNWNDSKKLLWLGSGAWIGLVVLVALLSFFVV	WP_016863105_2	2.20E-32
32065	WP_124970176	#592C00	Aphanothece	RelE-like toxin of type II toxin-antitoxin system HigB	PF05015.13	cc97	Aphanothece sacrum FPU1	2643	10	23.63	yes	MIISFGNQGTSDLFNGVESREARKIPSQISKTALKKLDILNAAEQLDELKVPPGNRLEALKGNLKGFYSIRINSQWRIIFQWDNGKVTQVQIIDYHS	WP_124970176_10	4.60E-27
32066	OGQ08743	#592C00	Deltaproteobacteria	RelE-like toxin of type II toxin-antitoxin system HigB	PF05015.13	cc97	Deltaproteobacteria bacterium RIFCSPHIGHO2_02_FULL_40_28	1401	4	13.52	yes	MIVSFKDKRAKELFEDLKPRGFPSDLICVARRKLLMLDAAAVLQDLRNPPGNHLEALKRERKGQYSIRINDQWRICFRFENGCAFDVEILDYH	OGQ08743_4	3.80E-27
32068	WP_169264746	#004000	Brasilonema	UbiA prenyltransferase family	PF01040.18	cc122	Brasilonema sennae CENA114	3942	2	7.87	yes	MSEQKPLSPWKYKPWWCQPWSILLTGVTLMGGSWVIFKIVWLTILVSVPVLTWMGFFLIIWPQLMIRSGVLESYEDQA	WP_169264746_2	1.20E-05
32069	WP_169264744	#004000	Brasilonema	UbiA prenyltransferase family	PF01040.18	cc122	Brasilonema sennae CENA114	6946	2	7.87	yes	MSEQKPLSPWKYKPWWCQPWSILLTGVTLMGGSWVIFKIVWLTILVSVPVLTWMGFFLIIWPQLMIRSGVLESYEDQA	WP_169264744_2	1.20E-05
32071	WP_096547181	#00C0C0	Staphylococcus	PTS system fructose IIA component	PF03610.16	cc138	Staphylococcus delphini	5688	1	58.96	yes	MTQIVLVSHSDKIAEGTQELLAQMAQDVTVVAIGGIEGEIGTSFDDISAVLNDIDDDAICFFDIGSSEMNLDMAIEMYTGTHRIEKVDAPIVEGSFIAAVALSTGQTIDEAIASVDEAF	WP_096547181_1	1.50E-25
32072	WP_162681093	#00C0C0	Staphylococcus	PTS system fructose IIA component	PF03610.16	cc138	Staphylococcus sp. MI 10-1553	6017	1	63.81	yes	MTQIVLVSHSDKIAEGTQELLAQMAQDVTVVAIGGIEGEIGTSFDDISAVLNDIDDDAICFFDIGSSEMNLDMAIEMYTGTHRIEKVDAPIVEGSFIAAVALSTGQTIDEAIASVDEAF	WP_162681093_1	1.50E-25
32074	WP_168880029	#008040	Rhizobium	OB-fold nucleic acid binding domain	PF01336.25	cc201	Rhizobium sp. P28RR-XV	1967	1	13.56	no	MLCQHPLAFLRKDLTARDIATYEEAMSTRDGRLLMTTDLVLVRQKPGSAKGVTFLTIEDETGPGNVVVWPTLFERRSRWCSVPA	WP_168880029_1	6.20E-08
32075	WP_168880027	#008040	Rhizobium	OB-fold nucleic acid binding domain	PF01336.25	cc201	Rhizobium sp. P28RR-XV	4969	1	18.56	yes	MLCQHPLAFLRKDLTARDIATYEEAMSTRDGRLLMTTDLVLVRQKPGSAKGVTFLTIEDETGPGNVVVWPTLFERRSRWCSVPA	WP_168880027_1	6.20E-08
32077	WP_131089594	#0000FF	Arthrobacter	none	none	cc158	Arthrobacter sp. S41	1089	4	14.6	no	MTVMAMRFQAMRFGQRLGEEGGDGVSHGDAQEEQAEISKVLLELRGFGRAILRGVVFSHCSCPFKDVVTRFRN	WP_131089594_4	none
32078	WP_061955677	#0000FF	Arthrobacter	none	none	cc158	Arthrobacter sp. EpRS66	1090	6	8.91	no	MTVMAMRFQAMRFGQRLGQEGSDGVSHGDANEEQSEISKVLLQLRGLGWAILRGVGFRHCFCPFKDV	WP_061955677_6	none
32080	WP_168880027	#800000	Rhizobium	none	none	cc176	Rhizobium sp. P28RR-XV	1104	5	12.32	yes	MDLVNAADGSDHSLLIDEIKHLFLDGPISDALGQRAESHTFVRPSETAVAKLSLHAASPPAEEFVGEYFAAHSGGGLCRSDICMSKQICHTDVCPPQVEEK	WP_168880027_5	none
32081	WP_018486514	#800000	Rhizobium	none	none	cc176	Rhizobium leguminosarum bv. viciae Vc2	1106	2	24.96	yes	MDLVKVADGLDDSVLADEIKHLFLDGPISDALAQRAESHTFVRLSETAVAKLSRHAASPPAEEFVGEYFAAHSGGGLCRSDICMSKQICHTDVCPPQVEEK	WP_018486514_2	none
32083	WP_051840628	#000040	Streptomyces	none	none	cc198	Streptomyces lavendulae subsp. lavendulae	211	2	-0.58	no	MVMQISDEVTVVVMAGASVASEAASSSGVV	WP_051840628_2	none
32084	WP_125821548	#000040	Streptomyces	none	none	cc198	Streptomyces sp. W1SF4	171	3	-4.33	no	MGTPSSDRGPGGVRRTGPGHWRIGAEGQQPQPTVIVMQISDEVTVVVMAGASVASEAASSSGVV	WP_125821548_3	none
32086	WP_109497443	#80FF40	Streptomyces	none	none	cc126	Streptomyces sp. Act143	6609	6	7.76	no	METAIERLTGLISGAPPSWAAAISSAEVYAA	WP_109497443_6	none
32087	WP_109497443	#80FF40	Streptomyces	none	none	cc126	Streptomyces sp. Act143	6230	5	7.76	no	METAIERLTGLISGAPPSWAAAISSAEVYAA	WP_109497443_5	none
32089	WP_162060722	#008040	Undibacterium	Domain of unknown function (DUF1843)	PF08898.10	cc123	Undibacterium sp. KW1	3416	3	25.22	no	MSAARDAAFSHLAAAADVARLLPELESAIKSKGGIIRPLYAVTIQDAVARGDQVEIARIKSELASYGNLLGGVSNSAAAFHPVTPYGVAIQDAQARGDQAEVDRLKELAQSLLAQLNASK	WP_162060722_3	0.01
32090	WP_110256027	#008040	Undibacterium	Cell wall synthesis protein CwsA	PF10814.8	cc123	Undibacterium pigrum	3443	2	21.1	no	MSAARDAAFSHLAAAADVARLLPELESAIKSKGGVIRPLYAVTIQDAVARGDQVEIARIKSELASYGNLLGGASNSAAAFHPVTPYGVAIQDAQARGDQAEVDRLKELAQSLLAQLNAGK	WP_110256027_2	5.20E-05
32092	WP_096680266	#C0C080	Nostoc	Phosphoribosylformylglycinamidine (FGAM) synthase	PF02700.14	cc143	Nostoc sp. NIES-2111	7689	3	25.27	yes	MQTKYLAKIFVTLRPSVLDPAGVAVQSGLQQMGYDNVENVRIGKYIELTITTNDKTKAHEDLDRICDQMLSNPVIENYRYDLIEVETQTGVF	WP_096680266_3	8.90E-35
32093	WP_010996620	#C0C080	Nostoc	Phosphoribosylformylglycinamidine (FGAM) synthase	PF02700.14	cc143	Nostoc sp. PCC 7120 = FACHB-418	7575	2	31.47	yes	MQTKYLAKIFVTLRPSVLDPAGVAVQSGLLQMGYDNVDHVRIGKYIELNITTSDEAKARQDLNRICDQMLSNPVIENYRFDLIEVETQTGVF	WP_010996620_2	2.70E-33
32095	WP_124200676	#404000	Pseudomonas	none	none	cc183	Pseudomonas aeruginosa	4301	2	-12.04	no	MVEVSRKLLQWFSVHSVVPGGMFT	WP_124200676_2	none
32096	WP_096604516	#404000	Calothrix	none	none	cc183	Calothrix sp. NIES-2100	4414	2	0.24	yes	MLVISKKLLFFFKAHSQIAA	WP_096604516_2	none
32098	PSB62113	#4000FF	Cyanobacteria	Dishevelled specific domain	PF02377.15	cc118	Cyanobacteria filamentous cyanobacterium CCP1	86	1	37.09	yes	MFDKLTDEDLTGVSLFAGAESFLKDLSEEDESSITGGKRSRSGRLKRRRRRRRLRRLRARRRRIARSRSNSISNS	PSB62113_1	1.10E-05
32099	WP_083782609	#4000FF	Cyanobium	Arginine/Serine-Rich protein 1	PF17069.5	cc118	Cyanobium sp. PCC 7001	141	1	15.77	yes	MKLMAIESPKDRQSLGLDLLSGADSFVKDLSPELEASITGGGGGHGDKTGSRSRSGGMHKRRRSRSRSRSGKHSRKYSRKYSKSYC	WP_083782609_1	4.80E-07
32101	SNT25203	#004080	Streptosporangium	none	none	cc131	Streptosporangium subroseum	2820	5	19.05	yes	MSACRDSASRTHGDLLSHDDAYAARLVTLAELAVSPEVRALVKPWGPPTPRRLAGIARIFGGRVHPVPSWEVPA	SNT25203_5	none
32102	AWS47415	#004080	Streptosporangium	Tetracyclin repressor-like, C-terminal domain	PF17940.1	cc131	Streptosporangium sp. caverna	2851	4	22.02	yes	MSACRDSASRTHGDLLSHDDAYAARLVTLAELAVSPEVRALVRPWGPPTPRRLAGIARIFGGRVEPAPSRKVPA	AWS47415_4	9.60E-07
32104	TCM33822	#40FF80	Kribbella	none	none	cc115	Kribbella sp. VKM Ac-2568	4439	1	24.9	yes	MKELEVELGERTYRIRTEVGNAFSHLNGPIGDFELLRDMIDIYNDLNSGDKVLIRWNLIPPSASGTCRADVADRCRGMGWLAPTLQ	TCM33822_1	none
32105	WP_138897977	#40FF80	Streptomyces	none	none	cc115	Streptomyces chryseus	4153	2	-8.64	no	GSSRADVRTRLRGSGGCPEV	WP_138897977_2	none
32107	WP_070396036	#008000	Moorea	none	none	cc160	Moorea producens PAL-8-15-08-1	5773	2	13.82	yes	MSTDFITNHDNNPKKQRIKCIKGSPEAVTKTIYGLYALGYGSVSDWSPLQPTGIPGQVISFATKYQTWR	WP_070396036_2	none
32108	WP_071107270	#008000	Moorea	none	none	cc160	Moorea producens JHB	5298	3	7.59	yes	MSTDFLPNHDNNPKKQRIKYIKGSPEAVTKTIYGLSALGYGSVYDWSPLQPTGIPGQVISFATKYQTWR	WP_071107270_3	none
32110	WP_061955677	#FFA500	Arthrobacter	none	none	cc159	Arthrobacter sp. EpRS66	6507	3	22.36	no	MDESPLPIITDTTGLGVGYRVLWRLKYLGLSIFGPAERRVDSSPRERIKWDRAMKVKAAHEAAGTQPDDQTLYTVSRLEPRRRPQ	WP_061955677_3	none
32111	WP_131089594	#FFA500	Arthrobacter	none	none	cc159	Arthrobacter sp. S41	6303	3	21.61	no	MDESPLPIIADTTGLSIGYRVLWRLKYLGLSIFGPAERRIEASPRERIKWDRAMRVKAAHDAAGTQPDEQTLYTVSRLESRRRPQ	WP_131089594_3	none
32113	WP_010996620	#7FFFBF	Nostoc	none	none	cc172	Nostoc sp. PCC 7120 = FACHB-418	2421	4	18.98	yes	MNENLPYILPVPQPQAEDTFAAYQTTHQFYYEVQKRSEFQRHCEWYYATAEQHRQELERMRGEVNIFSWFRRSSKI	WP_010996620_4	none
32114	WP_096680266	#7FFFBF	Nostoc	none	none	cc172	Nostoc sp. NIES-2111	2450	4	19.56	yes	MRENLPYILPTPQPQAEETFAVYQTTHQFYYEVQKRSEFERYCQWYYETAEQNRQELERMRGEVNIFSWFRRSSKM	WP_096680266_4	none
32116	WP_051642643	#808000	Streptomyces	none	none	cc165	Streptomyces sp. CNQ-525	2115	3	-0.94	no	MRAPRPGRGQVFVVPQSSGSSRRPRLPFACPFPWRKWTRAATFSGTTSANFVESELAALVTASRLVSAAASAALRTAGDSLNCCAAFRSCS	WP_051642643_3	none
32117	WP_047015652	#808000	Streptomyces	none	none	cc165	Streptomyces sp. CNQ-509	864	3	-2.1	no	MPFACPLPRKCTREATFSGTTSANFVESVLAALVTASRLVSAAASAALRTAGDSLNCCAAFRNCS	WP_047015652_3	none
32119	WP_087103312	#804040	Nocardiopsis	none	none	cc184	Nocardiopsis sp. JB363	6328	1	73.42	yes	MDRRELHERVSALALEVKDMVMGGEGWEPDGTTSVPLDFMDAFTLFQFGVYLEEEFDVLLVEEVVRSSDHTTEKVTETVARALAEQT	WP_087103312_1	none
32120	WP_067598320	#804040	Nocardiopsis	none	none	cc184	Nocardiopsis listeri NBRC 13360	6271	1	67.39	yes	MDRRELHERVSALALEVKDMVVGGPGWEPDGTTSVRLDFMDAFTLFQFGVYLEEEFDVLLVEEVSRMTDHTTEKVTETVARALTEQT	WP_067598320_1	none
32122	WP_006196066	#400000	Nodularia	none	none	cc199	Nodularia spumigena CCY9414	5568	4	11.17	no	MSKSGKKQEILQSMRNIPQQVINYISEAVSRIFSPRDDNYPATGVQPFEGDPPDKKND	WP_006196066_4	none
32123	TVP62142	#400000	Nodularia	none	none	cc199	Nodularia sp. (in: Bacteria)	6025	3	10.62	no	MSSSGKSRQILQSIRNIPQQVMNYISEAVSRIFSPRDDDYPATGVQPFEGDPPDKNND	TVP62142_3	none
32125	WP_110163988	#40FF00	Pectobacterium	TYA transposon protein	PF01021.19	cc112	Pectobacterium carotovorum subsp. carotovorum	1271	3	-11.03	no	MAFEPVQQRSGRWMGSRFVPERHHYSPQPASADLLSPVHIEDSMSGIVPVPEPVQQRSGRWMGSRFAPERHHYSPQPA	WP_110163988_3	4.80E-05
32126	WP_102116354	#40FF00	Pectobacterium	none	none	cc112	Pectobacterium aquaticum	1272	3	-8.25	no	MAFEPEQQHSGRWMGSKFAPARHHYSQQPA	WP_102116354_3	none
32128	WP_015113151	#804000	Nostoc	none	none	cc125	Nostoc sp. PCC 7107	5028	5	25.14	yes	MIKYHSLKVKSAELKVLLAVAGRLAHAELKDHPQEVEYQTQNRKIPPTQAGTFIERESTKYFVPDSALSEKLRMGGSPVEQTSVTQNSVLSKVNWLVVEE	WP_015113151_5	none
32129	WP_096575011	#804000	Anabaenopsis	none	none	cc125	Anabaenopsis circularis NIES-21	5234	8	12.05	yes	MKSAELKDYPKVVEYQLTQNKQLPPTKGRTFIEYESTKYFLPDSGAKRPATANSTQHSVLSKVNWLVVEE	WP_096575011_8	none
32131	WP_127078868	#00FF40	Calothrix	Alpha amylase inhibitor	PF01356.19	cc117	Calothrix desertica PCC 7102	2816	2	5.07	no	MYVNPIKNNFAKLARIAAVGTTAATLTLAGTVPPSLAAPAPSCVVVRSQARKSLTVQNQCRTQQRVKLIIAFGRDSACKVINPNGIVRFTWTFGNFDRLERC	WP_127078868_2	3.00E-11
32132	WP_019495762	#00FF40	Calothrix	Alpha amylase inhibitor	PF01356.19	cc117	Calothrix sp. PCC 7103	2850	2	11.82	no	MAAIGTTAATLTLASTVPPSFAAPAPNCVVVRSQARKSITVQNQCRTQQRVKLIIAFGRDSACRVINPSGIVRFTWTFGNFDRLERC	WP_019495762_2	1.90E-11
32134	WP_012409362	#4040FF	Nostoc	Prominin	PF05478.11	cc180	Nostoc punctiforme PCC 73102	1718	1	49.89	yes	MDNNNWLQQLMMMGLGTTSLVAEKLRQVSDDLVKDGKLNPEQAKAVIDDIAQQLKSEQGNWDVQMQRQMRNMMQDLGVARQSEVDELRGRIDRLERQLRDLENKLWR	WP_012409362_1	5.80E-06
32135	WP_114082527	#4040FF	Nostoc	Prominin	PF05478.11	cc180	Nostoc sp. ATCC 53789	2991	1	48.23	yes	MDNNNWLQQLMMMGLGTTSLVAEKLRQVSDDLVKDGKLNPEQAKAVIDDIAQQLKSEQGNWDVQMQRQMRNMMQDLGVARQSEVDELRGRIDRLERQLRDLENKLWR	WP_114082527_1	5.80E-06
32137	WP_017311237	#FF4000	Mastigocladus	Protein of unknown function (DUF2681)	PF10883.8	cc119	Mastigocladus laminosus UU774	3428	2	23.9	yes	MVQLVVLINTVISLVLLYIAWRVWRLRLLLARLTNLFMIAERCSHALFSQAPQALDISRQNIHNLRQTNQALELQIQQLQQIFSILLIGQRFWRRFYRRKVK	WP_017311237_2	0.014
32138	WP_016863105	#FF4000	Fischerella	Signal peptide peptidase	PF04258.13	cc119	Fischerella muscicola SAG 1427-1 = PCC 73103	3553	1	21.72	yes	MVQVVVVINTLISLILLYVAWRVWRLRLLLTRLTNLFILAERCSHALFSQAPQALDISRQNIHNLRQTNQALEVQIQQLQQIFSILFIGQRFWRRFSRRKVK	WP_016863105_1	4.10E-05
32140	WP_096594214	#C0C0FF	Calothrix	none	none	cc137	Calothrix sp. NIES-2098	1817	3	-2.28	yes	MLHQLGIPNVMKLNFIELKGCQFEKLSSSINR	WP_096594214_3	none
32141	WP_086837411	#C0C0FF	Nostoc	none	none	cc137	Nostoc sp. RF31YmG	1815	2	-4.16	yes	MLHQIRTPNFNQANFISCKVYT	WP_086837411_2	none
32143	AFY52807	#800040	Rivularia	none	none	cc129	Rivularia sp. PCC 7116	7568	6	12.87	yes	MNKQKSPEAKAFIGNLKNGIWLFGVSSWLFGITDRSIASLSDGYLSALDLTQLFTAATFFVAWLFLKPSSTKA	AFY52807_6	none
32144	RCJ25607	#800040	Nostoc	none	none	cc129	Nostoc minutum NIES-26	4734	1	11.61	yes	MKDQQQSDSKDFVGYLKNGIWLFGLSSWVFGITDRSIASFADGYLSALDLTQLFTAATFFVGWLFLKPTNA	RCJ25607_1	none
32146	WP_017743137	#400040	Scytonema	none	none	cc164	Scytonema hofmannii PCC 7110	4242	1	46.09	yes	MSEQISEPTSEQSLEERHKLYCELIDKLLRCPNGQEPEVLEAHLELIDAGLIQTMLQVATGFAHQGNQDGAKFLIHVTKELSKQLGFYPEIPNSTEEGKE	WP_017743137_1	none
32147	WP_155752488	#400040	Scytonema	none	none	cc164	Scytonema sp. UIC 10036	4272	1	50.59	yes	MSEQISEPISEQSLEERHRLYCELIEKLLRCPNGEEPEVLEAHLDLIDPGLIQTMLQVATGFAHQGNQDGAKFLIHVTKELSKQLGLYPEIPNSTEVGKGAIDNNAVD	WP_155752488_1	none
32149	WP_049976882	#40FF40	Streptomyces	none	none	cc179	Streptomyces leeuwenhoekii	4541	2	-2.59	yes	MRTPCAGTDGDGTGQREGGTA	WP_049976882_2	none
32150	WP_052808529	#40FF40	Streptomyces	none	none	cc179	Streptomyces cyaneogriseus subsp. noncyanogenus	4539	3	-2.98	yes	MRPPCAGTDGDGTGQREGGTA	WP_052808529_3	none
32152	WP_016950293	#404000	Anabaena	Nodulin-like	PF06813.13	cc105	Anabaena sp. PCC 7108	4012	2	7.48	yes	MVGYGWVWLKVKNFVVKLDIKPIFLLPAAVCLHNIALLGVKNFRH	WP_016950293_2	5.20E-07
32153	WP_127056592	#404000	Trichormus	none	none	cc105	Trichormus variabilis SAG 1403-4b	4269	3	1.05	yes	MVGSTNFLAKSDIKSVCFLSPPVCLHNIALLVVKNYRH	WP_127056592_3	none
32155	WP_093116829	#4040FF	Thermoleophilum	none	none	cc102	Thermoleophilum album	5388	1	58.7	no	MDDGRRFELEQMLNRPGTYFNPQTEVLVIVDDSASLDGEIFNLEPFEGAEWILISDEVPVDEARRDELLERFQDQFGGETGREVHERAVEDPDARELEGE	WP_093116829_1	none
32156	WP_093601002	#4040FF	Lentzea	none	none	cc102	Lentzea waywayandensis	2436	8	9.03	yes	MAILVDDSAEKVLPVDGEAFDLIRFE	WP_093601002_8	none
32158	WP_096681247	#40C0C0	Nostoc	Thioredoxin	PF00085.20	cc144	Nostoc sp. NIES-2111	7732	7	42.87	yes	MTNDAVAYVQENEFETLLGEEKVLVVDFTATWCGPCRLVSPLMDQLADEYKDRVKVVKVDVDNNKPIFKRFGLRSIPAVLIFKNGELVEKIVGVSPYEQFSNAVDKLVEI	WP_096681247_7	1.00E-29
32159	WP_070396421	#40C0C0	Moorea	Thioredoxin	PF00085.20	cc144	Moorea producens PAL-8-15-08-1	6571	1	44.29	no	MSTVAYIKDSEFDALLTSEVPVVVDFTAPWCGPCRKIGPLMDKLSEEYKDRVKVVKIDIDADKATAKKYSIRSIPAVLIFKGGEVVETIVGVADYEKFTAALEQQL	WP_070396421_1	1.90E-31
32161	WP_010996620	#FFC0CB	Nostoc	Domain of unknown function (DUF1918)	PF08940.11	cc171	Nostoc sp. PCC 7120 = FACHB-418	2657	3	26.98	no	MEILVEKGVNVVMKVGDRVCVKESVVVYHHPEHRGKAFDLKGSEGEIVEIVTQWQGRPVSANLPFLIQFSKKFKAHLRENELEVI	WP_010996620_3	2.20E-05
32162	WP_096680266	#FFC0CB	Nostoc	Ferredoxin thioredoxin reductase variable alpha chain	PF02941.15	cc171	Nostoc sp. NIES-2111	2687	2	31.46	no	MEVLVEKGVNVVMKVGDRVSVKESVVVYHHPEHRGQAFDLKASEGEIVEIVTQWQGRPVSANLPFLVQFGKKFKAHLRENELEVI	WP_096680266_2	6.70E-39
32164	BAU44627	#0040FF	Leptolyngbya	none	none	cc191	Leptolyngbya sp. O-77	21	2	27.94	no	MRRWIAGVGAGVVCGTAGAMGVGAGLGHALPPPEDVPEEVLRTQIVLEGRSPVTGEPLTASEHATQQASRQTAIEEQPRDLPPEIRQTVMLLKLRRLLRPVLPFIF	BAU44627_2	none
32165	WP_172358022	#0040FF	Thermoleptolyngbya	Pre-toxin TG	PF14449.6	cc191	Thermoleptolyngbya sp. PKUAC-SCTA183	21	1	37.74	no	MRRWIAGVGVGVVCGIAGAMGVEAGLGHALPPPEDVPEEVLRTQIVLEGRSPVTGEPLTASERATQQTSRQTAIEEQPRDLPPEIRQTVMLLKLRRLLRPVLPFIF	WP_172358022_1	0.04
32167	KQP70226	#00C0FF	Microbacterium	Transcriptional regulator PadR-like family	PF03551.14	cc151	Microbacterium sp. Leaf288	5906	1	67.77	no	MTQDDAFAADLLRGHTDTIVLGVLRRGDAYGFEIYKAIRDATGGDHEIKEATLYATYRRLEKDGLVESYWGDESQGGRRKYYRITDAGRAVFRGNVAAWTATRRIIDSLLDVKESQQ	KQP70226_1	2.50E-26
32168	WP_045296661	#00C0FF	Microbacterium	Transcriptional regulator PadR-like family	PF03551.14	cc151	Microbacterium trichothecenolyticum	5908	1	71.88	no	MTQDDAFAADLLRGHTDTIVLGVLRRGDAYGFEIYKTIRDATGGDHEIKEATLYATYRRLEKDGLVESYWGDESQGGRRKYYRITDAGRAVFRGNVAAWTATRRIIDSLLDVKESQQ	WP_045296661_1	4.00E-26
32170	WP_124970176	#404080	Aphanothece	Cro/C1-type HTH DNA-binding domain	PF13443.6	cc186	Aphanothece sacrum FPU1	2353	3	33.61	yes	MIPTNRIPTHPGVILLEEFLEPMNITQIALANHLNIPVQRINEIIKGKQEITPETAWLLAQAFKTTPQFWMNLQTNYDLALNRPKEIKQAIIA	WP_124970176_3	4.00E-05
32171	OGQ08743	#404080	Deltaproteobacteria	Helix-turn-helix	PF01381.22	cc186	Deltaproteobacteria bacterium RIFCSPHIGHO2_02_FULL_40_28	1067	2	27.06	yes	METKKMPPIHPGEILLEEFLKPLKISQTRLARGIGVPYRRVNEIVQSKRSITPDTALRFSVYFKTTPEFWMNLQIQYELRVLKQKLNKRYEKINPYSEHLERFL	OGQ08743_2	1.40E-12
32173	WP_131076036	#40FF80	Xanthomonas	none	none	cc193	Xanthomonas oryzae	1225	2	24.73	yes	MRSHFEDLLESKVVESFNLTDAMANDLAGESIDNITPTIVVTIAIITSASEC	WP_131076036_2	none
32174	WP_156170590	#40FF80	Luteimonas	none	none	cc193	Luteimonas sp. FCS-9	1313	2	17.28	yes	MKSRFEDLLEAHVVESFNLTDAMANDLAGESTDNATPTTIWAIAIITSAAEC	WP_156170590_2	none
32176	WP_045296661	#0080FF	Microbacterium	none	none	cc99	Microbacterium trichothecenolyticum	5945	3	-2.01	yes	MMRRVAVQAATLPRKTARPASVMR	WP_045296661_3	none
32177	KQP70226	#0080FF	Microbacterium	none	none	cc99	Microbacterium sp. Leaf288	5943	3	-10.4	yes	MMRRVAVQAATLPRKTARPASVMR	KQP70226_3	none
32179	WP_169264746	#8040FF	Brasilonema	none	none	cc194	Brasilonema sennae CENA114	3030	3	7.12	yes	MRVSLRRIRALETLPQRWSHLTLPYRASLSLLRRGKDFSVAKSEGEVKGEMCVHRRLAKGSQCVAEPVLQEGFPP	WP_169264746_3	none
32180	WP_169264744	#8040FF	Brasilonema	none	none	cc194	Brasilonema sennae CENA114	53	3	7.12	yes	MRVSLRRIRALETLPQRWSHLTLPYRASLSLLRRGKDFSVAKSEGEVKGEMCVHRRLAKGSQCVAEPVLQEGFPP	WP_169264744_3	none
32182	WP_084520237	#00FF00	Nocardia	Hypothetical bacterial integral membrane protein (Trep_Strep)	PF09605.10	cc169	Nocardia mexicana	2527	4	15.56	yes	MKVSTGTVVAIVAAVIALVIVFLGGEVTVAAAVAVAGGLIGAVVGKNFNRDQNDRGIR	WP_084520237_4	1.60E-06
32183	WP_068028504	#00FF00	Nocardia	Hypothetical bacterial integral membrane protein (Trep_Strep)	PF09605.10	cc169	Nocardia mexicana	3872	4	15.56	yes	MKVSTGTVVAIVAAVIALVIVFLGGEVTVAAAVAVAGGLIGAVVGKNFNRDQNDRGIR	WP_068028504_4	1.60E-06
32185	WP_067652746	#003366	Agrobacterium	Domain of unknown function (DUF4432)	PF14486.6	cc163	Agrobacterium bohemicum	5564	4	11.39	yes	MARVTGLEPATSGVTGRHSNQLSYTRALFRIMRSVVFEEGMARVTGLEPATSGVTGRHSNQLSYTRTFLLKTGLDPPYELASAVR	WP_067652746_4	0.00012
32186	WP_062451377	#003366	Rhizobium	none	none	cc163	Rhizobium sp. Leaf262	5215	3	4.61	yes	MARVTGLEPATSGVTGRHSNQLSYTRTFPKDWPKPVLRTRLGCSLSG	WP_062451377_3	none
32188	WP_155752488	#004040	Scytonema	none	none	cc103	Scytonema sp. UIC 10036	1590	4	10.25	yes	MGALNLFSVAENFLTDLSAEDESTITGGGKRGKYNSSKSRSKSKSKSGSKSKS	WP_155752488_4	none
32189	WP_017743137	#004040	Scytonema	none	none	cc103	Scytonema hofmannii PCC 7110	1575	5	9.37	yes	MGALNLFSVAENFLTDLSAEDESTITGGGKRGKYNSSKSGSKSRSKSRSKSKS	WP_017743137_5	none
32191	WP_095739934	#B25900	Rhodopirellula	none	none	cc174	Rhodopirellula sp. SM50	5	1	10.78	yes	MTDERAQAALHAAQHAAMAAHHAAMAAQCAAIAAGAPQQGTGGGPGQMQGPPMGYQYPGQNPYTQQQPGPHPMTVW	WP_095739934_1	none
32192	WP_145385118	#B25900	Planctomycetes	none	none	cc174	Planctomycetes bacterium Enr13	4	2	17.54	yes	MTDERAQAALHAAQHAAMAAHHAAMAAQCAAIAAGAPQQGTGGGPGQMQGAPMGYQYPGQNPYMQQQPGPHPMTVW	WP_145385118_2	none
32194	WP_051857755	#804040	Streptomyces	none	none	cc106	Streptomyces cellulosae	136	3	0.48	no	MLISRCCPSHPLRSTGYRFSGPDSRAVGGNTADRTDTSPRWARDQQPHLTLATMLSETMVCGEGASSGVTSSAISLTSAYVSKPAASSMSFIVVSLVY	WP_051857755_3	none
32195	WP_121024930	#804040	Streptomyces	none	none	cc106	Streptomyces sp. 3212.4	195	2	-8.44	no	MLATTLSETMVCGEGASSGVTSSAISLTSA	WP_121024930_2	none
32197	WP_015140719	#408040	Nostoc	Occluded RNA-recognition motif	PF16842.5	cc185	Nostoc sp. PCC 7524	2973	2	41.38	no	MSIYVGNLSYSVTQDDLTKVFAEYGAVTRVQLPTDRETGRVRGFGFVEMESSAAEDAAIQALDGAEWMGRVMKVNKARPREEKSTRSGGGSWGKNNGGYSRQY	WP_015140719_2	4.30E-06
32198	WP_096681247	#408040	Nostoc	RRM-like domain	PF11835.8	cc185	Nostoc sp. NIES-2111	6813	1	57.6	no	MSVYVGNLSYDVTEDSLNAVFAEYGSVKRVQLPTDRETGRMRGFAFVEMNSDAEETAAIEALDGAEWMGRDLKVNKAKPKEDRGSFGGGGNRGSYGGRNRY	WP_096681247_1	1.70E-05
32200	WP_131076036	#FFC0FF	Xanthomonas	Transposase	PF01527.20	cc148	Xanthomonas oryzae	5423	1	51.48	no	MKKRFSEEQIIGFLREAEAGMPIKDLCRRHGFSEASYYLWRSKFGGMSVPDAKRLKDLEAENTRLKKLLAEQVFQNDLIKEALQKKW	WP_131076036_1	9.50E-26
32201	WP_130690339	#FFC0FF	Rhizobium	Transposase	PF01527.20	cc148	Rhizobium leguminosarum bv. viciae	6371	1	51.93	yes	MKRNRFTDEQIIGILKEHEAGTPVAELCRKHGVSDASIYKWKAKFGGMEVSEAKRLKTLEDENTKLKRLLADAMLDNAALKDLLGKKW	WP_130690339_1	1.10E-26
32203	WP_017743137	#8040FF	Scytonema	none	none	cc116	Scytonema hofmannii PCC 7110	4554	2	43.46	yes	MLLTEIDAGLIALEFLMAEWNISDEDRQWFVIVNSRLTGQSWYVVELSVAGLPDRWYIQVYDTGACDPDYTFVSPIRGLEGYADLKDLPYLVAEVLVSERNTR	WP_017743137_2	none
32204	WP_155752488	#8040FF	Scytonema	none	none	cc116	Scytonema sp. UIC 10036	4585	2	38.24	yes	MLLTETDAGLIALEFLMAEWNVSDEDRQWFVIVNSRLIGQSWYVVELSVAGLPDRWYIQVYDTGACDPDYTFVSPIRGLEGYTDLKDLPYLVAEVLLSERNTR	WP_155752488_2	none
32206	WP_088888836	#C080C0	Leptolyngbya	Protein of unknown function (DUF1509)	PF07420.11	cc142	Leptolyngbya ohadii IS1	295	2	25.15	yes	MDKNFVQDLNPAGFALFSGAENFLQDLSEEEESTISGGRRSNSRSRRPRRRPRRRPRRRPARSVSRS	WP_088888836_2	8.20E-05
32207	RNJ67588	#C080C0	Leptolyngbya	Dishevelled specific domain	PF02377.15	cc142	Leptolyngbya sp. IPPAS B-1204	238	1	26.04	yes	MANNLSELQPIGSSLLFGTESFLSALSEEDESVITGGRGSNSSRPRRRRPRRRPRRRRPARSVSRT	RNJ67588_1	3.20E-07
32209	TVP63782	#FF00C0	Nodularia	SMODS and SLOG-associating 2TM effector domain 6	PF18169.1	cc149	Nodularia sp. (in: Bacteria)	1214	6	24.6	yes	MNFNDFPTVMSIIALLIGITFLILSDYIAAGVWLCYGLATLLVNKVGSSNMDNFSRIDVIIAWATIVSFISLLLFQLHRDFVAR	TVP63782_6	0.00023
32210	AVH79456	#FF00C0	Roholtiella	Protein of unknown function (DUF3796)	PF12676.7	cc149	Roholtiella [Tolypothrix] sp. PCC 7415	1199	5	28.34	yes	MNFNDFPFVMSMIALLIGMTFLILSDYIAAGVWLCYGLATFLVNKVGSSNMSNLSRPEVILAWATMVGFISLFLLQLHRDYVAR	AVH79456_5	6.60E-05
32212	WP_096590410	#00FFFF	Calothrix	ThiS family	PF02597.20	cc162	Calothrix sp. NIES-2098	6278	1	28.21	no	MSNSVITVTVKLFAAYQEAYKTSELVLEFPNGTPVRAVCDRLIAEHPELRQLRDITRFGINLIFVEPDTPLQNGDEVVLIPPVSGG	WP_096590410_1	6.70E-20
32213	WP_096590413	#00FFFF	Calothrix	ThiS family	PF02597.20	cc162	Calothrix sp. NIES-2098	3271	1	28.21	no	MSNSVITVTVKLFAAYQEAYKTSELVLEFPNGTPVRAVCDRLIAEHPELRQLRDITRFGINLIFVEPDTPLQNGDEVVLIPPVSGG	WP_096590413_1	6.70E-20
32215	WP_125690181	#00FF40	Amycolatopsis	none	none	cc195	Amycolatopsis sp. WAC 04169	99	2	14.86	yes	MHSDELFAAYAEFTTPADLSISPADSHAGSRNTATPTFLSYAETRPESERE	WP_125690181_2	none
32216	WP_123798532	#00FF40	Amycolatopsis	none	none	cc195	Amycolatopsis keratiniphila	96	3	15.55	yes	MHSEELFAAYHEFTTSTELSVASYGSHTGSRNTTTPTFLTDTADHAHAPRNNE	WP_123798532_3	none
32218	WP_129202808	#0040FF	Xylanimonas	plantaricin: plantaricin C family lantibiotic	NF000539.0	cc113	Xylanimonas allomyrinae	7864	4	20.81	yes	MNNAYAAAGDVTLELTAHQVDAEADATAGGLWTIPGTSTIGRFCTLSWECQGIACG	WP_129202808_4	1.00E-08
32219	WP_106331017	#0040FF	Actinoplanes	plantaricin: plantaricin C family lantibiotic	NF000539.0	cc113	Actinoplanes italicus	5666	1	60.46	yes	MLTNDDFDAAGDILAELSDSEIDLDAAQAAGGLFTVPGTSTIGYVCTYSYECSFPKRLCGIGD	WP_106331017_1	2.70E-09
32221	WP_015116255	#FA8072	Rivularia	6-O-methylguanine DNA methyltransferase, DNA binding domain	PF01035.20	cc166	Rivularia sp. PCC 7116	2222	1	38.96	yes	MSTYDLIYKTVRQIPVGKVATYGQIADLAGLHGKARLVGYAMFQVDRDVNDIPWHRVINAKGEISYSTVREGGDYLQKQMLEEEGIEFNSAGKINLNQYQWQPNFC	WP_015116255_1	1.40E-26
32222	WP_096659345	#FA8072	Calothrix	Calcitonin gene-related peptide regulator C terminal	PF12414.8	cc166	Calothrix parasitica NIES-267	2183	2	40.33	yes	MSTYDLIYKTVRKIPAGKVATYGQIADLAGLYGKARLVGYAMFHVDTTSDDIPWHRVINAKGEISYSNLREGGDYLQKQLLEDEGIEFNSAGKVNLSQYRWEPSI	WP_096659345_2	7.50E-06
32224	WP_045869173	#40FF00	Fremyella	none	none	cc190	Fremyella diplosiphon NIES-3275	7759	3	19.6	yes	MSVRYNQNNAPLVKVVYSQVKVNGKLQLVPLELYADGSLKRSQG	WP_045869173_3	none
32225	WP_073591536	#40FF00	Phormidium	none	none	cc190	Phormidium ambiguum IAM M-71	3748	7	11.71	no	MCTKYNKNNSLFVRIVYSKVKINGKVELVPLELYADGTVKKAG	WP_073591536_7	none
32227	WP_096576751	#40FF40	Aulosira	none	none	cc101	Aulosira laxa NIES-50	405	2	-2.06	no	MLSYCRNSGTSSFRHPPLKVLHSSLPTVAQALLRVLQSPPRIFISSSPKSFIKLSESRNNSAPVITMS	WP_096576751_2	none
32228	WP_096576757	#40FF40	Aulosira	none	none	cc101	Aulosira laxa NIES-50	1381	2	-2.06	no	MLSYCRNSGTSSFRHPPLKVLHSSLPTVAQALLRVLQSPPRIFISSSPKSFIKLSESRNNSAPVITMS	WP_096576757_2	none
32230	WP_150881471	#C0FF80	Larkinella	none	none	cc153	Larkinella sp. MA1	1890	1	-0.6	yes	MDRMGFRCKQAAAYDESLSGNSRENTGIIPLNLQRTNGKFTNSDHGFLVKWYRKVLTFVELNN	WP_150881471_1	none
32231	WP_138989358	#C0FF80	Larkinella	none	none	cc153	Larkinella sp. C7	1883	1	4.98	yes	MDRMGFRYKQAADQDESLNGNFRKNTGILPLNLQKTNSKFTNSDHGFIVKGYRKGVTFIDLNN	WP_138989358_1	none
32233	WP_006619051	#FF69B4	Arthrospira	HicB_like antitoxin of bacterial toxin-antitoxin system	PF15919.5	cc182	Arthrospira platensis YZ	5337	3	27.07	no	MYGFVWEGEMATSLSTPTRDKAKCMKINAIIHPAEEGGYWAEVPALRGCITEGDTLEEVTQNLKDAVEGWLSVANNSPKNIEPTDKIVEIAV	WP_006619051_3	3.70E-13
32234	WP_006622760	#FF69B4	Arthrospira	HicB_like antitoxin of bacterial toxin-antitoxin system	PF15919.5	cc182	Arthrospira platensis C1	5405	10	20.13	no	MKIKAIIHPAEEGGYWVEVPALPGCITEGDTWEEVTQNLQDAVEGWLSVANNSLKKTEPTDEIVEKQGWFLQRITGSH	WP_006622760_10	1.10E-14
32236	AVH79607	#4080FF	Nostoc	none	none	cc127	Nostoc sp. PCC 9205	1961	3	24.37	yes	MNITPYLLGVIGLTLVVYGEYILGTVLLIIAGGEIVLPNLNTTTDTQATVVRFGFIVTIASLMFYRLFYIR	AVH79607_3	none
32237	WP_103138325	#4080FF	Nostoc	none	none	cc127	Nostoc sp. CENA543	1292	6	28.18	yes	MNITPYLFGLIGLALLIEGENILASVLFITTVAQLAFPNLNTTAGTSATILRFGLIVIIASLLIYRLFFARSRT	WP_103138325_6	none
32239	WP_079189213	#400000	Streptomyces	none	none	cc121	Streptomyces kebangsaanensis	1163	3	34.82	yes	MKMNSHSHVAGRMARLGVVAGAALLIGGSPMTAGNAFAADQETAVRHSTETVGERLSEKTRQLVDDVEDVLSRLPSPVNGWQ	WP_079189213_3	none
32240	WP_145487439	#400000	Streptomyces	none	none	cc121	Streptomyces collinus	1178	3	17.96	yes	MSRDFHSFVSISIARIGVTAGVALVIAGAPVLFGNAFAAEQDLPIAHSTTSVGERISETVTGLVAEMGEGILPLASRVNGWQ	WP_145487439_3	none
32242	WP_159529421	#40FFFF	Streptomyces	CsbD-like	PF05532.12	cc187	Streptomyces sp. Tu 3180	4808	2	36.73	no	MAGDQKAKAKAEQAKGKAKEAAGRAVGNERLEAEGRAEQSKGDARQAKEKTKDVFRH	WP_159529421_2	3.20E-21
32243	AOX46105	#40FFFF	Microbacterium	YtxH-like protein	PF12732.7	cc187	Microbacterium sp. BH-3-3-3	7615	1	55.82	no	MGLDDKIKNAAQDIVGKAKEAIGNATDNDKLAAEGKADQVKADAKKAGENVKDTFK	AOX46105_1	1.20E-05
32245	WP_045869173	#FF4000	Fremyella	Protein of unknown function (DUF2288)	PF10052.9	cc197	Fremyella diplosiphon NIES-3275	6286	1	46.45	no	MPDFRAELAENLDESEWEWLIPHVKRDAVILVASGLDLLDVGVAIASDNIPQVQIWIDEQLITKPNPEQLGEWNANPQKRFQTLIVQPYVIVQEIANT	WP_045869173_1	2.50E-39
32246	WP_096594214	#FF4000	Calothrix	Protein of unknown function (DUF2288)	PF10052.9	cc197	Calothrix sp. NIES-2098	6436	1	46.07	no	MPDLRAELAENLDEAEWEWLIPHVKRDAVIVVTQGLDLLDVGLAIASDNIPQVQLWIDEQLITKPSTEQLGEWNANPQKRFQTLIVQPYVLVQEMVNT	WP_096594214_1	8.30E-41
32248	AWS47415	#FF4080	Streptosporangium	PASTA domain	PF03793.19	cc128	Streptosporangium sp. caverna	2583	1	36.32	no	MTFSEALPETDEQIQRYVGMDLMAARAEAEAAGWAVVRLLEEHMPRTMDYRSDRINLTTDGTTDRFNASSGTGIVIEVDNG	AWS47415_1	9.50E-05
32249	SNT25203	#FF4080	Streptosporangium	HicB_like antitoxin of bacterial toxin-antitoxin system	PF15919.5	cc128	Streptosporangium subroseum	2507	2	36.06	no	MDGACKVARLGNDAVMTFSEALPETDEQIQRYVGMDLMAARAEAEAAGWAVVRLLEEHMPRTMDYRPDRINLTTDGTTDRFNASSGTGIVIEVDNG	SNT25203_2	2.10E-05
32251	WP_016864763	#006400	Fischerella	Mo-dependent nitrogenase C-terminus	PF06967.11	cc168	Fischerella muscicola CCMEE 5323	3250	5	15.7	no	MKTILNKMRLWLDSFEVRDRKIAYFLCKLIPSQCPFERDIKLFGHTLCHLPPLCKLNPLYEQLVGLRLQALCYLAGEYKHITTINDLAHT	WP_016864763_5	1.20E-40
32252	WP_106218514	#006400	Cyanosarcina	Mo-dependent nitrogenase C-terminus	PF06967.11	cc168	Cyanosarcina cf. burmensis CCALA 770	1988	2	33.98	yes	MMTLTHLILKFDLLQLIRQWLEGVEVHNSKLAKFLCKLIPASCPFERDIKFFDRILFHIPALCKLNPFYEQLMNIRFRSLSYLADKCGEDLIISC	WP_106218514_2	2.50E-44
32254	WP_089126833	#FFC0C0	Tolypothrix	23S rRNA-intervening sequence protein	PF05635.11	cc135	Tolypothrix sp. NIES-4075	1818	2	17.86	yes	MSEINDFKDLKIWQKGMDIAEKCYLLTKLFPKDELYGMVQQIRRSAASVPANIA	WP_089126833_2	5.80E-22
32255	WP_089126836	#FFC0C0	Tolypothrix	23S rRNA-intervening sequence protein	PF05635.11	cc135	Tolypothrix sp. NIES-4075	258	2	17.86	yes	MSEINDFKDLKIWQKGMDIAEKCYLLTKLFPKDELYGMVQQIRRSAASVPANIA	WP_089126836_2	5.80E-22
