# Supplementary material for: Understanding thioamitide biosynthesis using pathway engineering and untargeted metabolomics
Source: Royal Society of Chemistry journal article supplement (doi:10.1039/d0sc06835g), 2021-01-01
Supplement: d0sc06835g3.cys [file d0sc06835g3.cys › CytoscapeSession-2021_03_29-10_56/tables/51-51/HIDDEN-org.cytoscape.model.CyNetwork-51+hidden+network.cytable]

"CyCSV-Version","1"
"SUID"
"java.lang.Long"
""
"51 hidden network",""
"51"
