# Supplementary material for: Understanding thioamitide biosynthesis using pathway engineering and untargeted metabolomics
Source: Royal Society of Chemistry journal article supplement (doi:10.1039/d0sc06835g), 2021-01-01
Supplement: d0sc06835g3.cys [file d0sc06835g3.cys › CytoscapeSession-2021_03_29-10_56/tables/61-cc_1.to.202.txt/LOCAL_ATTRS-org.cytoscape.model.CyEdge-cc_1.to.202.txt+default+edge.cytable]

CyCSV-Version	1
SUID	interaction	name	selected
java.lang.Long	java.lang.String	java.lang.String	java.lang.Boolean
cc_1.to.202.txt default edge
73	interacts with	WP_162399505_1 (interacts with) WP_096559014_1	false
75	interacts with	WP_162399505_1 (interacts with) WP_138498533_4	false
77	interacts with	WP_162399505_1 (interacts with) WP_066383651_5	false
79	interacts with	WP_162399505_1 (interacts with) WP_096536886_5	false
81	interacts with	WP_162399505_1 (interacts with) WP_015212417_1	false
83	interacts with	WP_162399505_1 (interacts with) WP_006195640_4	false
85	interacts with	WP_162399505_1 (interacts with) WP_099071810_2	false
87	interacts with	WP_162399505_1 (interacts with) WP_015113151_1	false
89	interacts with	WP_162399505_1 (interacts with) WP_096559014_5	false
91	interacts with	WP_162399505_1 (interacts with) BAZ29283_1	false
93	interacts with	WP_162399505_1 (interacts with) WP_096730381_2	false
95	interacts with	WP_162399505_1 (interacts with) WP_073639381_1	false
97	interacts with	WP_162399505_1 (interacts with) WP_162399505_5	false
99	interacts with	WP_162399505_1 (interacts with) WP_026100063_2	false
101	interacts with	WP_162399505_1 (interacts with) CEJ45116_2	false
103	interacts with	WP_162399505_1 (interacts with) WP_062295185_1	false
105	interacts with	WP_162399505_1 (interacts with) WP_087539234_4	false
107	interacts with	WP_162399505_1 (interacts with) WP_015210601_6	false
109	interacts with	WP_162399505_1 (interacts with) CEJ45116_5	false
111	interacts with	WP_162399505_1 (interacts with) WP_099071810_1	false
113	interacts with	WP_162399505_1 (interacts with) WP_009343975_1	false
115	interacts with	WP_162399505_1 (interacts with) TAE59458_3	false
117	interacts with	WP_162399505_1 (interacts with) WP_016950446_1	false
119	interacts with	WP_162399505_1 (interacts with) WP_087539234_7	false
121	interacts with	WP_162399505_1 (interacts with) WP_096559014_4	false
123	interacts with	WP_162399505_1 (interacts with) WP_013190203_1	false
125	interacts with	WP_162399505_1 (interacts with) WP_106240815_2	false
127	interacts with	WP_162399505_1 (interacts with) WP_096575011_6	false
129	interacts with	WP_162399505_1 (interacts with) OBQ18754_2	false
131	interacts with	WP_162399505_1 (interacts with) WP_015212417_2	false
133	interacts with	WP_162399505_1 (interacts with) WP_011321056_1	false
135	interacts with	WP_162399505_1 (interacts with) WP_069073064_6	false
137	interacts with	WP_162399505_1 (interacts with) RCJ30949_2	false
139	interacts with	WP_162399505_1 (interacts with) WP_071189061_3	false
141	interacts with	WP_162399505_1 (interacts with) WP_069073064_1	false
143	interacts with	WP_162399505_1 (interacts with) CEJ45116_1	false
145	interacts with	WP_162399505_1 (interacts with) OBQ01900_3	false
147	interacts with	WP_162399505_1 (interacts with) WP_096536886_1	false
149	interacts with	WP_162399505_1 (interacts with) TVP62740_1	false
151	interacts with	WP_162399505_1 (interacts with) BAZ29283_4	false
153	interacts with	WP_162399505_1 (interacts with) WP_096575011_3	false
155	interacts with	WP_162399505_1 (interacts with) WP_168496018_1	false
157	interacts with	WP_162399505_1 (interacts with) RCJ30949_4	false
159	interacts with	WP_162399505_1 (interacts with) WP_087539234_1	false
161	interacts with	WP_162399505_1 (interacts with) WP_096728455_2	false
163	interacts with	WP_162399505_1 (interacts with) WP_168645325_1	false
165	interacts with	WP_162399505_1 (interacts with) WP_096681247_5	false
167	interacts with	WP_162399505_1 (interacts with) WP_069073064_5	false
169	interacts with	WP_162399505_1 (interacts with) RCJ14929_3	false
171	interacts with	WP_162399505_1 (interacts with) WP_089091039_2	false
173	interacts with	WP_162399505_1 (interacts with) WP_011321056_5	false
175	interacts with	WP_162399505_1 (interacts with) BAZ29283_3	false
177	interacts with	WP_162399505_1 (interacts with) WP_162399505_4	false
179	interacts with	WP_162399505_1 (interacts with) OBQ36138_1	false
181	interacts with	WP_162399505_1 (interacts with) WP_096569967_3	false
183	interacts with	WP_162399505_1 (interacts with) WP_096569967_5	false
185	interacts with	WP_162399505_1 (interacts with) TVP62740_6	false
187	interacts with	WP_162399505_1 (interacts with) WP_096681247_2	false
189	interacts with	WP_162399505_1 (interacts with) WP_044449859_1	false
191	interacts with	WP_162399505_1 (interacts with) WP_096569967_4	false
193	interacts with	WP_162399505_1 (interacts with) WP_006195640_2	false
195	interacts with	WP_162399505_1 (interacts with) WP_168465654_1	false
197	interacts with	WP_162399505_1 (interacts with) WP_073644071_5	false
199	interacts with	WP_162399505_1 (interacts with) WP_096559014_8	false
201	interacts with	WP_162399505_1 (interacts with) WP_071189061_2	false
203	interacts with	WP_162399505_1 (interacts with) WP_006195640_7	false
205	interacts with	WP_162399505_1 (interacts with) WP_066383651_2	false
207	interacts with	WP_162399505_1 (interacts with) WP_089091039_3	false
209	interacts with	WP_162399505_1 (interacts with) WP_015155263_3	false
211	interacts with	WP_162399505_1 (interacts with) WP_026100063_6	false
213	interacts with	WP_162399505_1 (interacts with) WP_096575011_2	false
215	interacts with	WP_162399505_1 (interacts with) RCJ30949_5	false
217	interacts with	WP_162399505_1 (interacts with) WP_099071810_6	false
219	interacts with	WP_162399505_1 (interacts with) WP_066383651_4	false
220	interacts with	WP_096559014_1 (interacts with) WP_096730381_2	false
222	interacts with	WP_096559014_1 (interacts with) WP_096730381_1	false
225	interacts with	WP_096569967_6 (interacts with) OBQ36138_3	false
227	interacts with	WP_096569967_6 (interacts with) WP_114082527_7	false
229	interacts with	WP_096569967_6 (interacts with) WP_015078657_10	false
231	interacts with	WP_096569967_6 (interacts with) WP_137906310_5	false
233	interacts with	WP_096569967_6 (interacts with) WP_096664869_5	false
235	interacts with	WP_096569967_6 (interacts with) WP_168496018_3	false
237	interacts with	WP_096569967_6 (interacts with) OBQ18150_1	false
239	interacts with	WP_096569967_6 (interacts with) WP_057178590_8	false
241	interacts with	WP_096569967_6 (interacts with) BAZ29283_7	false
243	interacts with	WP_096569967_6 (interacts with) WP_148763415_5	false
245	interacts with	WP_096569967_6 (interacts with) WP_071189061_4	false
247	interacts with	WP_096569967_6 (interacts with) WP_009343975_4	false
249	interacts with	WP_096569967_6 (interacts with) WP_168465654_4	false
251	interacts with	WP_096569967_6 (interacts with) WP_168501874_4	false
253	interacts with	WP_096569967_6 (interacts with) WP_168645325_4	false
254	interacts with	WP_096569967_6 (interacts with) WP_015210601_6	false
256	interacts with	WP_096569967_6 (interacts with) WP_013190203_4	false
258	interacts with	WP_096569967_6 (interacts with) WP_027402982_8	false
260	interacts with	WP_096569967_6 (interacts with) WP_038089561_4	false
262	interacts with	WP_096569967_6 (interacts with) OBQ18754_3	false
264	interacts with	WP_096569967_6 (interacts with) WP_168357543_5	false
266	interacts with	WP_011610106_2 (interacts with) WP_138498533_4	false
268	interacts with	WP_011610106_2 (interacts with) WP_124155194_2	false
270	interacts with	WP_011610106_2 (interacts with) WP_124970176_6	false
272	interacts with	WP_011610106_2 (interacts with) WP_015216084_5	false
274	interacts with	WP_011610106_2 (interacts with) WP_167725682_2	false
276	interacts with	WP_011610106_2 (interacts with) WP_073591536_1	false
278	interacts with	WP_011610106_2 (interacts with) WP_006619051_7	false
280	interacts with	WP_011610106_2 (interacts with) WP_087542717_3	false
282	interacts with	WP_011610106_2 (interacts with) WP_163927072_1	false
283	interacts with	WP_011610106_2 (interacts with) WP_096730381_2	false
285	interacts with	WP_011610106_2 (interacts with) WP_106218514_1	false
287	interacts with	WP_011610106_2 (interacts with) AVH79535_6	false
289	interacts with	WP_011610106_2 (interacts with) WP_012597836_5	false
291	interacts with	WP_011610106_2 (interacts with) WP_015216084_10	false
293	interacts with	WP_011610106_2 (interacts with) WP_096580419_1	false
295	interacts with	WP_011610106_2 (interacts with) WP_012597836_4	false
297	interacts with	WP_011610106_2 (interacts with) WP_109013279_1	false
299	interacts with	WP_011610106_2 (interacts with) WP_017721129_1	false
301	interacts with	WP_011610106_2 (interacts with) WP_086769105_4	false
303	interacts with	WP_011610106_2 (interacts with) WP_070396036_3	false
305	interacts with	WP_011610106_2 (interacts with) WP_127086205_3	false
307	interacts with	WP_011610106_2 (interacts with) WP_127086205_4	false
309	interacts with	WP_011610106_2 (interacts with) WP_168643398_4	false
311	interacts with	WP_011610106_2 (interacts with) WP_099068319_5	false
312	interacts with	WP_011610106_2 (interacts with) WP_087539234_7	false
314	interacts with	WP_011610106_2 (interacts with) WP_087542717_2	false
316	interacts with	WP_011610106_2 (interacts with) WP_103138325_3	false
318	interacts with	WP_011610106_2 (interacts with) WP_124970176_14	false
320	interacts with	WP_011610106_2 (interacts with) WP_017748579_3	false
322	interacts with	WP_011610106_2 (interacts with) WP_006197379_2	false
324	interacts with	WP_011610106_2 (interacts with) WP_096689510_2	false
326	interacts with	WP_011610106_2 (interacts with) WP_138499827_1	false
328	interacts with	WP_011610106_2 (interacts with) WP_002735885_4	false
330	interacts with	WP_011610106_2 (interacts with) WP_096689510_5	false
332	interacts with	WP_011610106_2 (interacts with) WP_012595952_5	false
334	interacts with	WP_011610106_2 (interacts with) TRT88208_1	false
336	interacts with	WP_011610106_2 (interacts with) WP_138499827_5	false
338	interacts with	WP_011610106_2 (interacts with) WP_012409787_3	false
340	interacts with	WP_011610106_2 (interacts with) WP_086769105_3	false
342	interacts with	WP_011610106_2 (interacts with) WP_006513161_3	false
344	interacts with	WP_011610106_2 (interacts with) AVH79607_2	false
346	interacts with	WP_011610106_2 (interacts with) WP_138499827_4	false
347	interacts with	WP_011610106_2 (interacts with) WP_015155263_3	false
349	interacts with	WP_011610106_2 (interacts with) WP_086835908_1	false
350	interacts with	WP_011610106_2 (interacts with) OBQ01900_3	false
352	interacts with	WP_011610106_2 (interacts with) WP_017314970_2	false
354	interacts with	WP_011610106_2 (interacts with) WP_106240815_3	false
356	interacts with	WP_011610106_2 (interacts with) WP_096689510_6	false
358	interacts with	WP_011610106_2 (interacts with) WP_017314970_1	false
361	interacts with	WP_066371470_6 (interacts with) WP_062346719_1	false
363	interacts with	WP_066371470_6 (interacts with) WP_155349848_2	false
365	interacts with	WP_066371470_6 (interacts with) WP_155349848_3	false
367	interacts with	WP_066371470_6 (interacts with) WP_155358788_2	false
369	interacts with	WP_066371470_6 (interacts with) WP_062339008_4	false
371	interacts with	WP_066371470_6 (interacts with) WP_066371470_2	false
373	interacts with	WP_066371470_6 (interacts with) WP_062339008_5	false
375	interacts with	WP_066371470_6 (interacts with) WP_066371470_1	false
377	interacts with	WP_066371470_6 (interacts with) WP_062339008_2	false
379	interacts with	WP_066371470_6 (interacts with) WP_066371470_7	false
381	interacts with	WP_066371470_6 (interacts with) WP_155358788_1	false
382	interacts with	WP_015216084_5 (interacts with) WP_138498533_4	false
383	interacts with	WP_015216084_5 (interacts with) WP_015212417_1	false
384	interacts with	WP_015216084_5 (interacts with) WP_167725682_2	false
386	interacts with	WP_015216084_5 (interacts with) WP_015207767_1	false
388	interacts with	WP_015216084_5 (interacts with) WP_096537472_3	false
389	interacts with	WP_015216084_5 (interacts with) WP_099071810_1	false
390	interacts with	WP_015216084_5 (interacts with) TAE59458_3	false
391	interacts with	WP_015216084_5 (interacts with) WP_096559014_4	false
392	interacts with	WP_015216084_5 (interacts with) WP_015212417_2	false
393	interacts with	WP_015216084_5 (interacts with) AVH79607_2	false
395	interacts with	WP_015216084_5 (interacts with) WP_015216084_6	false
397	interacts with	WP_015216084_5 (interacts with) WP_068385845_3	false
398	interacts with	WP_015216084_5 (interacts with) WP_124155194_2	false
399	interacts with	WP_015216084_5 (interacts with) RCJ14929_3	false
401	interacts with	WP_015216084_5 (interacts with) WP_015207767_4	false
402	interacts with	WP_015216084_5 (interacts with) WP_012597836_5	false
404	interacts with	WP_015216084_5 (interacts with) WP_087592205_6	false
405	interacts with	WP_015216084_5 (interacts with) WP_096569967_5	false
407	interacts with	WP_015216084_5 (interacts with) WP_015207763_1	false
408	interacts with	WP_015216084_5 (interacts with) WP_073644071_5	false
409	interacts with	WP_015216084_5 (interacts with) WP_124970176_14	false
410	interacts with	WP_015216084_5 (interacts with) WP_006197379_2	false
411	interacts with	WP_015216084_5 (interacts with) WP_096689510_2	false
412	interacts with	WP_015216084_5 (interacts with) WP_006195640_7	false
413	interacts with	WP_015216084_5 (interacts with) WP_017314970_2	false
414	interacts with	WP_015216084_5 (interacts with) WP_099071810_6	false
416	interacts with	WP_015216084_5 (interacts with) WP_027843178_3	false
418	interacts with	WP_015216084_5 (interacts with) WP_106289349_2	false
421	interacts with	WP_138689268_3 (interacts with) WP_138666048_2	false
423	interacts with	WP_138689268_3 (interacts with) WP_052856102_3	false
425	interacts with	WP_138689268_3 (interacts with) WP_079181075_4	false
427	interacts with	WP_138689268_3 (interacts with) WP_079189213_2	false
429	interacts with	WP_138689268_3 (interacts with) WP_127931424_2	false
431	interacts with	WP_138689268_3 (interacts with) WP_049976882_1	false
434	interacts with	WP_167721203_10 (interacts with) WP_168643398_7	false
436	interacts with	WP_167721203_10 (interacts with) WP_070396036_1	false
438	interacts with	WP_167721203_10 (interacts with) WP_099700413_2	false
440	interacts with	WP_167721203_10 (interacts with) WP_086760950_11	false
442	interacts with	WP_167721203_10 (interacts with) WP_099700413_4	false
444	interacts with	WP_167721203_10 (interacts with) WP_096589596_10	false
445	interacts with	WP_096536886_5 (interacts with) WP_096559014_1	false
448	interacts with	WP_079191916_3 (interacts with) WP_052680420_4	false
450	interacts with	WP_079191916_3 (interacts with) WP_051708270_1	false
452	interacts with	WP_079191916_3 (interacts with) WP_051837683_4	false
454	interacts with	WP_079191916_3 (interacts with) WP_079191916_2	false
456	interacts with	WP_079191916_3 (interacts with) WP_107777750_1	false
458	interacts with	WP_079191916_3 (interacts with) ALC22075_5	false
460	interacts with	WP_079191916_3 (interacts with) WP_133890759_3	false
462	interacts with	WP_079191916_3 (interacts with) WP_109595189_5	false
464	interacts with	WP_079191916_3 (interacts with) WP_157846946_1	false
466	interacts with	WP_079191916_3 (interacts with) WP_051837683_5	false
468	interacts with	WP_079191916_3 (interacts with) WP_052680420_3	false
470	interacts with	WP_079191916_3 (interacts with) WP_051700182_4	false
472	interacts with	WP_079191916_3 (interacts with) WP_157846946_2	false
474	interacts with	WP_079191916_3 (interacts with) WP_055704502_1	false
476	interacts with	WP_079191916_3 (interacts with) WP_052856102_2	false
478	interacts with	WP_079191916_3 (interacts with) WP_109595189_2	false
480	interacts with	WP_079191916_3 (interacts with) WP_093619522_5	false
482	interacts with	WP_079191916_3 (interacts with) WP_051700182_2	false
484	interacts with	WP_079191916_3 (interacts with) WP_052680420_2	false
486	interacts with	WP_079191916_3 (interacts with) WP_055704502_2	false
488	interacts with	WP_079191916_3 (interacts with) WP_130878496_1	false
490	interacts with	WP_079191916_3 (interacts with) WP_093619522_1	false
492	interacts with	WP_079191916_3 (interacts with) WP_093619522_4	false
494	interacts with	WP_079191916_3 (interacts with) WP_133890759_2	false
495	interacts with	WP_079191916_3 (interacts with) WP_079189213_2	false
497	interacts with	WP_079191916_3 (interacts with) WP_145487439_1	false
499	interacts with	WP_079191916_3 (interacts with) WP_109595189_1	false
501	interacts with	WP_079191916_3 (interacts with) WP_145487439_2	false
503	interacts with	WP_079191916_3 (interacts with) WP_104258544_2	false
505	interacts with	WP_079191916_3 (interacts with) WP_170198719_1	false
508	interacts with	WP_019505167_1 (interacts with) WP_019505167_3	false
510	interacts with	WP_019505167_1 (interacts with) WP_019505167_2	false
512	interacts with	WP_086769105_5 (interacts with) WP_096537472_3	false
513	interacts with	WP_086769105_5 (interacts with) WP_086769105_3	false
514	interacts with	WP_086769105_5 (interacts with) WP_087542717_3	false
515	interacts with	WP_086769105_5 (interacts with) WP_138499827_4	false
518	interacts with	WP_052269673_2 (interacts with) WP_136238412_3	false
521	interacts with	WP_019501955_13 (interacts with) WP_019501955_9007	false
523	interacts with	WP_019501955_13 (interacts with) WP_019501955_10	false
525	interacts with	ANS68054_2 (interacts with) WP_052680420_4	false
527	interacts with	ANS68054_2 (interacts with) WP_053706403_3	false
529	interacts with	ANS68054_2 (interacts with) AWS47415_3	false
531	interacts with	ANS68054_2 (interacts with) WP_053706403_2	false
532	interacts with	ANS68054_2 (interacts with) WP_051708270_1	false
534	interacts with	ANS68054_2 (interacts with) WP_106115031_4	false
536	interacts with	ANS68054_2 (interacts with) ANS68054_1	false
538	interacts with	ANS68054_2 (interacts with) WP_017198207_2	false
539	interacts with	ANS68054_2 (interacts with) WP_079191916_3	false
540	interacts with	ANS68054_2 (interacts with) WP_051837683_4	false
542	interacts with	ANS68054_2 (interacts with) ALC22075_1	false
544	interacts with	ANS68054_2 (interacts with) WP_130878496_5	false
546	interacts with	ANS68054_2 (interacts with) WP_093619522_3	false
547	interacts with	ANS68054_2 (interacts with) WP_107777750_1	false
548	interacts with	ANS68054_2 (interacts with) ALC22075_5	false
549	interacts with	ANS68054_2 (interacts with) WP_133890759_3	false
550	interacts with	ANS68054_2 (interacts with) WP_109595189_5	false
551	interacts with	ANS68054_2 (interacts with) WP_157846946_1	false
553	interacts with	ANS68054_2 (interacts with) WP_079181075_2	false
554	interacts with	ANS68054_2 (interacts with) WP_052680420_3	false
555	interacts with	ANS68054_2 (interacts with) WP_051837683_5	false
556	interacts with	ANS68054_2 (interacts with) WP_051700182_4	false
557	interacts with	ANS68054_2 (interacts with) WP_157846946_2	false
558	interacts with	ANS68054_2 (interacts with) WP_055704502_1	false
559	interacts with	ANS68054_2 (interacts with) WP_052856102_2	false
561	interacts with	ANS68054_2 (interacts with) WP_158686821_1	false
562	interacts with	ANS68054_2 (interacts with) WP_109595189_2	false
563	interacts with	ANS68054_2 (interacts with) WP_093619522_5	false
565	interacts with	ANS68054_2 (interacts with) SNT25203_1	false
566	interacts with	ANS68054_2 (interacts with) WP_051700182_2	false
568	interacts with	ANS68054_2 (interacts with) AWS47415_2	false
570	interacts with	ANS68054_2 (interacts with) WP_052680420_1	false
572	interacts with	ANS68054_2 (interacts with) SNT25203_4	false
574	interacts with	ANS68054_2 (interacts with) WP_016570561_2	false
575	interacts with	ANS68054_2 (interacts with) WP_130878496_1	false
577	interacts with	ANS68054_2 (interacts with) WP_051837683_3	false
578	interacts with	ANS68054_2 (interacts with) WP_055704502_2	false
579	interacts with	ANS68054_2 (interacts with) WP_052680420_2	false
580	interacts with	ANS68054_2 (interacts with) WP_093619522_1	false
581	interacts with	ANS68054_2 (interacts with) WP_093619522_4	false
583	interacts with	ANS68054_2 (interacts with) WP_130878496_2	false
584	interacts with	ANS68054_2 (interacts with) WP_052856102_3	false
585	interacts with	ANS68054_2 (interacts with) WP_133890759_2	false
586	interacts with	ANS68054_2 (interacts with) WP_079181075_4	false
587	interacts with	ANS68054_2 (interacts with) WP_079189213_2	false
588	interacts with	ANS68054_2 (interacts with) WP_109595189_1	false
589	interacts with	ANS68054_2 (interacts with) WP_145487439_1	false
591	interacts with	ANS68054_2 (interacts with) WP_051700182_1	false
593	interacts with	ANS68054_2 (interacts with) PZN41733_2	false
595	interacts with	ANS68054_2 (interacts with) WP_016570561_1	false
596	interacts with	ANS68054_2 (interacts with) WP_145487439_2	false
598	interacts with	ANS68054_2 (interacts with) WP_159425899_2	false
600	interacts with	ANS68054_2 (interacts with) WP_051708270_2	false
601	interacts with	ANS68054_2 (interacts with) WP_170198719_1	false
603	interacts with	WP_089091039_1 (interacts with) WP_162399505_1	false
604	interacts with	WP_089091039_1 (interacts with) WP_096559014_1	false
606	interacts with	WP_089091039_1 (interacts with) WP_103136595_2	false
608	interacts with	WP_089091039_1 (interacts with) TVP62740_2	false
610	interacts with	WP_089091039_1 (interacts with) WP_069073064_4	false
611	interacts with	WP_089091039_1 (interacts with) WP_096536886_5	false
612	interacts with	WP_089091039_1 (interacts with) WP_015212417_1	false
613	interacts with	WP_089091039_1 (interacts with) WP_006195640_4	false
614	interacts with	WP_089091039_1 (interacts with) WP_099071810_2	false
615	interacts with	WP_089091039_1 (interacts with) WP_015113151_1	false
616	interacts with	WP_089091039_1 (interacts with) WP_096559014_5	false
618	interacts with	WP_089091039_1 (interacts with) WP_009343975_2	false
620	interacts with	WP_089091039_1 (interacts with) WP_038089561_2	false
622	interacts with	WP_089091039_1 (interacts with) WP_103136595_3	false
624	interacts with	WP_089091039_1 (interacts with) WP_015139846_1	false
625	interacts with	WP_089091039_1 (interacts with) WP_073639381_1	false
627	interacts with	WP_089091039_1 (interacts with) WP_015113151_4	false
629	interacts with	WP_089091039_1 (interacts with) WP_057178590_1	false
631	interacts with	WP_089091039_1 (interacts with) WP_096575011_4	false
632	interacts with	WP_089091039_1 (interacts with) WP_096537472_3	false
633	interacts with	WP_089091039_1 (interacts with) CEJ45116_2	false
634	interacts with	WP_089091039_1 (interacts with) WP_062295185_1	false
635	interacts with	WP_089091039_1 (interacts with) WP_087539234_4	false
636	interacts with	WP_089091039_1 (interacts with) CEJ45116_5	false
638	interacts with	WP_089091039_1 (interacts with) WP_015212417_3	false
640	interacts with	WP_089091039_1 (interacts with) WP_066383651_3	false
642	interacts with	WP_089091039_1 (interacts with) TAE59458_1	false
643	interacts with	WP_089091039_1 (interacts with) WP_099071810_1	false
644	interacts with	WP_089091039_1 (interacts with) WP_009343975_1	false
645	interacts with	WP_089091039_1 (interacts with) WP_087539234_7	false
646	interacts with	WP_089091039_1 (interacts with) WP_016950446_1	false
647	interacts with	WP_089091039_1 (interacts with) WP_096559014_4	false
648	interacts with	WP_089091039_1 (interacts with) WP_013190203_1	false
650	interacts with	WP_089091039_1 (interacts with) WP_016950446_3	false
651	interacts with	WP_089091039_1 (interacts with) OBQ18754_2	false
652	interacts with	WP_089091039_1 (interacts with) WP_096575011_6	false
654	interacts with	WP_089091039_1 (interacts with) WP_096537472_5	false
655	interacts with	WP_089091039_1 (interacts with) WP_015212417_2	false
656	interacts with	WP_089091039_1 (interacts with) WP_071189061_3	false
657	interacts with	WP_089091039_1 (interacts with) RCJ30949_2	false
659	interacts with	WP_089091039_1 (interacts with) WP_089091039_4	false
660	interacts with	WP_089091039_1 (interacts with) WP_069073064_1	false
661	interacts with	WP_089091039_1 (interacts with) OBQ01900_3	false
662	interacts with	WP_089091039_1 (interacts with) CEJ45116_1	false
664	interacts with	WP_089091039_1 (interacts with) WP_062295185_6	false
665	interacts with	WP_089091039_1 (interacts with) TVP62740_1	false
666	interacts with	WP_089091039_1 (interacts with) WP_096536886_1	false
668	interacts with	WP_089091039_1 (interacts with) WP_096536886_4	false
669	interacts with	WP_089091039_1 (interacts with) WP_096575011_3	false
670	interacts with	WP_089091039_1 (interacts with) WP_168496018_1	false
672	interacts with	WP_089091039_1 (interacts with) RCJ30949_6	false
674	interacts with	WP_089091039_1 (interacts with) WP_099068319_6	false
675	interacts with	WP_089091039_1 (interacts with) RCJ30949_4	false
677	interacts with	WP_089091039_1 (interacts with) WP_137906310_1	false
679	interacts with	WP_089091039_1 (interacts with) WP_104387267_1	false
680	interacts with	WP_089091039_1 (interacts with) WP_069073064_5	false
682	interacts with	WP_089091039_1 (interacts with) WP_096559014_6	false
683	interacts with	WP_089091039_1 (interacts with) RCJ14929_3	false
685	interacts with	WP_089091039_1 (interacts with) WP_038089561_1	false
687	interacts with	WP_089091039_1 (interacts with) RCJ14929_1	false
688	interacts with	WP_089091039_1 (interacts with) WP_015216084_10	false
689	interacts with	WP_089091039_1 (interacts with) WP_089091039_2	false
690	interacts with	WP_089091039_1 (interacts with) BAZ29283_3	false
692	interacts with	WP_089091039_1 (interacts with) WP_073644071_4	false
694	interacts with	WP_089091039_1 (interacts with) WP_066383651_6	false
695	interacts with	WP_089091039_1 (interacts with) OBQ36138_1	false
696	interacts with	WP_089091039_1 (interacts with) WP_096569967_3	false
698	interacts with	WP_089091039_1 (interacts with) WP_006195640_9	false
700	interacts with	WP_089091039_1 (interacts with) WP_087539234_3	false
701	interacts with	WP_089091039_1 (interacts with) WP_096569967_5	false
703	interacts with	WP_089091039_1 (interacts with) WP_006195640_5	false
704	interacts with	WP_089091039_1 (interacts with) TVP62740_6	false
706	interacts with	WP_089091039_1 (interacts with) WP_069073064_7	false
708	interacts with	WP_089091039_1 (interacts with) WP_006195640_8	false
709	interacts with	WP_089091039_1 (interacts with) WP_096569967_4	false
710	interacts with	WP_089091039_1 (interacts with) WP_044449859_1	false
712	interacts with	WP_089091039_1 (interacts with) WP_062295185_4	false
713	interacts with	WP_089091039_1 (interacts with) WP_006195640_2	false
714	interacts with	WP_089091039_1 (interacts with) WP_168465654_1	false
715	interacts with	WP_089091039_1 (interacts with) WP_073644071_5	false
716	interacts with	WP_089091039_1 (interacts with) WP_071189061_2	false
717	interacts with	WP_089091039_1 (interacts with) WP_096559014_8	false
718	interacts with	WP_089091039_1 (interacts with) WP_006195640_7	false
720	interacts with	WP_089091039_1 (interacts with) WP_087539234_6	false
721	interacts with	WP_089091039_1 (interacts with) WP_066383651_2	false
722	interacts with	WP_089091039_1 (interacts with) WP_089091039_3	false
724	interacts with	WP_089091039_1 (interacts with) WP_073644071_8	false
726	interacts with	WP_089091039_1 (interacts with) WP_073644071_2	false
728	interacts with	WP_089091039_1 (interacts with) WP_096537472_2	false
729	interacts with	WP_089091039_1 (interacts with) WP_096575011_2	false
730	interacts with	WP_089091039_1 (interacts with) RCJ30949_5	false
732	interacts with	WP_089091039_1 (interacts with) WP_096620064_1	false
733	interacts with	WP_089091039_1 (interacts with) WP_017314970_2	false
734	interacts with	WP_089091039_1 (interacts with) WP_099071810_6	false
736	interacts with	WP_089091039_1 (interacts with) WP_087539234_2	false
738	interacts with	WP_096589596_4 (interacts with) WP_138498533_4	false
739	interacts with	WP_096589596_4 (interacts with) WP_103138325_3	false
741	interacts with	WP_096589596_4 (interacts with) WP_167721203_3	false
743	interacts with	WP_096589596_4 (interacts with) AVH79628_3	false
745	interacts with	WP_096589596_4 (interacts with) WP_015216084_7	false
746	interacts with	WP_096589596_4 (interacts with) TRT88208_1	false
748	interacts with	WP_096589596_4 (interacts with) WP_086760950_4	false
749	interacts with	WP_096589596_4 (interacts with) WP_086835908_1	false
750	interacts with	WP_096589596_4 (interacts with) WP_096537472_3	false
752	interacts with	WP_096589596_4 (interacts with) RCJ19623_1	false
753	interacts with	WP_096589596_4 (interacts with) WP_015216084_6	false
755	interacts with	WP_096589596_4 (interacts with) WP_167721203_2	false
757	interacts with	WP_096589596_4 (interacts with) WP_104899482_2	false
759	interacts with	WP_096589596_4 (interacts with) WP_019501037_1	false
761	interacts with	RCJ19623_5 (interacts with) WP_124970176_14	false
763	interacts with	RCJ19623_5 (interacts with) AVH79456_4	false
766	interacts with	WP_019495762_1 (interacts with) WP_099068319_4	false
768	interacts with	WP_019495762_1 (interacts with) WP_027845719_1	false
769	interacts with	WP_019495762_1 (interacts with) WP_124155194_2	false
770	interacts with	WP_019495762_1 (interacts with) WP_138498533_4	false
771	interacts with	WP_019495762_1 (interacts with) WP_015216084_5	false
773	interacts with	WP_019495762_1 (interacts with) BAZ42602_1	false
774	interacts with	WP_019495762_1 (interacts with) WP_167721203_3	false
776	interacts with	WP_019495762_1 (interacts with) WP_017318973_3	false
777	interacts with	WP_019495762_1 (interacts with) WP_163927072_1	false
779	interacts with	WP_019495762_1 (interacts with) AVH79456_3	false
780	interacts with	WP_019495762_1 (interacts with) WP_109013279_1	false
781	interacts with	WP_019495762_1 (interacts with) WP_096537472_3	false
782	interacts with	WP_019495762_1 (interacts with) RCJ19623_1	false
783	interacts with	WP_019495762_1 (interacts with) WP_087592205_6	false
784	interacts with	WP_019495762_1 (interacts with) WP_127086205_3	false
785	interacts with	WP_019495762_1 (interacts with) WP_019501037_1	false
786	interacts with	WP_019495762_1 (interacts with) WP_099068319_5	false
787	interacts with	WP_019495762_1 (interacts with) WP_124970176_14	false
788	interacts with	WP_019495762_1 (interacts with) WP_006197379_2	false
789	interacts with	WP_019495762_1 (interacts with) WP_138499827_1	false
791	interacts with	WP_019495762_1 (interacts with) WP_106300787_1	false
792	interacts with	WP_019495762_1 (interacts with) WP_002735885_4	false
793	interacts with	WP_019495762_1 (interacts with) WP_015216084_7	false
794	interacts with	WP_019495762_1 (interacts with) WP_012595952_5	false
796	interacts with	WP_019495762_1 (interacts with) WP_027843178_2	false
797	interacts with	WP_019495762_1 (interacts with) WP_138499827_5	false
798	interacts with	WP_019495762_1 (interacts with) WP_086835908_1	false
799	interacts with	WP_019495762_1 (interacts with) WP_015216084_6	false
800	interacts with	WP_019495762_1 (interacts with) WP_017314970_1	false
801	interacts with	WP_019495762_1 (interacts with) WP_027843178_3	false
803	interacts with	WP_019495762_1 (interacts with) WP_127078868_1	false
805	interacts with	WP_019495762_1 (interacts with) WP_096688632_1	false
807	interacts with	WP_052808529_1 (interacts with) WP_053706403_3	false
808	interacts with	WP_052808529_1 (interacts with) AWS47415_3	false
810	interacts with	WP_052808529_1 (interacts with) WP_164394909_1	false
812	interacts with	WP_052808529_1 (interacts with) WP_068150862_3	false
813	interacts with	WP_052808529_1 (interacts with) WP_138689268_3	false
815	interacts with	WP_052808529_1 (interacts with) PZN41733_3	false
816	interacts with	WP_052808529_1 (interacts with) ANS68054_1	false
818	interacts with	WP_052808529_1 (interacts with) WP_170198719_2	false
820	interacts with	WP_052808529_1 (interacts with) WP_091097544_2	false
821	interacts with	WP_052808529_1 (interacts with) WP_051837683_4	false
822	interacts with	WP_052808529_1 (interacts with) ALC22075_1	false
823	interacts with	WP_052808529_1 (interacts with) WP_093619522_3	false
824	interacts with	WP_052808529_1 (interacts with) WP_107777750_1	false
826	interacts with	WP_052808529_1 (interacts with) WP_139979956_2	false
828	interacts with	WP_052808529_1 (interacts with) WP_015659226_4	false
829	interacts with	WP_052808529_1 (interacts with) WP_133890759_3	false
831	interacts with	WP_052808529_1 (interacts with) WP_078760724_1	false
832	interacts with	WP_052808529_1 (interacts with) WP_079181075_2	false
834	interacts with	WP_052808529_1 (interacts with) WP_159688203_1	false
835	interacts with	WP_052808529_1 (interacts with) WP_157846946_2	false
836	interacts with	WP_052808529_1 (interacts with) WP_051700182_2	false
837	interacts with	WP_052808529_1 (interacts with) WP_049976882_1	false
839	interacts with	WP_052808529_1 (interacts with) WP_068150862_2	false
840	interacts with	WP_052808529_1 (interacts with) WP_138666048_2	false
841	interacts with	WP_052808529_1 (interacts with) WP_051837683_3	false
842	interacts with	WP_052808529_1 (interacts with) WP_133890759_2	false
843	interacts with	WP_052808529_1 (interacts with) WP_079189213_2	false
844	interacts with	WP_052808529_1 (interacts with) WP_145487439_1	false
845	interacts with	WP_052808529_1 (interacts with) WP_127931424_2	false
847	interacts with	WP_052808529_1 (interacts with) WP_060892878_4	false
848	interacts with	WP_052808529_1 (interacts with) WP_170198719_1	false
851	interacts with	WP_071107270_1 (interacts with) WP_027845719_2	false
853	interacts with	WP_071107270_1 (interacts with) BBD63560_2	false
854	interacts with	WP_071107270_1 (interacts with) WP_099068319_4	false
856	interacts with	WP_071107270_1 (interacts with) WP_096580419_3	false
857	interacts with	WP_071107270_1 (interacts with) WP_027845719_1	false
859	interacts with	WP_071107270_1 (interacts with) WP_035150190_4	false
860	interacts with	WP_071107270_1 (interacts with) WP_011610106_2	false
861	interacts with	WP_071107270_1 (interacts with) WP_096728455_2	false
863	interacts with	WP_071107270_1 (interacts with) WP_053455886_3	false
865	interacts with	WP_071107270_1 (interacts with) WP_006513161_2	false
867	interacts with	WP_071107270_1 (interacts with) WP_099068319_2	false
869	interacts with	WP_071107270_1 (interacts with) WP_096688632_2	false
871	interacts with	WP_071107270_1 (interacts with) WP_015197629_3	false
872	interacts with	WP_071107270_1 (interacts with) TVP62740_2	false
874	interacts with	WP_071107270_1 (interacts with) RCJ40850_1	false
876	interacts with	WP_071107270_1 (interacts with) WP_169219633_3	false
878	interacts with	WP_071107270_1 (interacts with) RCJ40850_2	false
880	interacts with	WP_071107270_1 (interacts with) AVH79535_2	false
882	interacts with	WP_071107270_1 (interacts with) WP_053455886_1	false
884	interacts with	WP_071107270_1 (interacts with) BBD63560_4	false
885	interacts with	WP_071107270_1 (interacts with) WP_087542717_3	false
887	interacts with	WP_071107270_1 (interacts with) WP_068385845_2	false
888	interacts with	WP_071107270_1 (interacts with) WP_012597836_5	false
889	interacts with	WP_071107270_1 (interacts with) WP_096580419_1	false
890	interacts with	WP_071107270_1 (interacts with) WP_012597836_4	false
892	interacts with	WP_071107270_1 (interacts with) WP_088242795_2	false
894	interacts with	WP_071107270_1 (interacts with) WP_011610106_1	false
895	interacts with	WP_071107270_1 (interacts with) WP_006195640_9	false
897	interacts with	WP_071107270_1 (interacts with) BBD63560_3	false
898	interacts with	WP_071107270_1 (interacts with) WP_070396036_3	false
900	interacts with	WP_071107270_1 (interacts with) WP_015189896_3	false
902	interacts with	WP_071107270_1 (interacts with) WP_068385845_4	false
904	interacts with	WP_071107270_1 (interacts with) WP_169219633_1	false
905	interacts with	WP_071107270_1 (interacts with) WP_099068319_5	false
907	interacts with	WP_071107270_1 (interacts with) WP_012597836_3	false
909	interacts with	WP_071107270_1 (interacts with) WP_027845719_3	false
911	interacts with	WP_071107270_1 (interacts with) WP_124970176_11	false
913	interacts with	WP_071107270_1 (interacts with) WP_012597836_6	false
915	interacts with	WP_071107270_1 (interacts with) WP_012597836_7	false
917	interacts with	WP_071107270_1 (interacts with) WP_163670238_2	false
919	interacts with	WP_071107270_1 (interacts with) WP_105222244_3	false
920	interacts with	WP_071107270_1 (interacts with) WP_124970176_14	false
922	interacts with	WP_071107270_1 (interacts with) WP_106240815_1	false
923	interacts with	WP_071107270_1 (interacts with) WP_106240815_2	false
924	interacts with	WP_071107270_1 (interacts with) WP_017748579_3	false
925	interacts with	WP_071107270_1 (interacts with) WP_096537472_5	false
927	interacts with	WP_071107270_1 (interacts with) WP_073643028_3	false
929	interacts with	WP_071107270_1 (interacts with) WP_015197629_1	false
931	interacts with	WP_071107270_1 (interacts with) WP_053455886_2	false
933	interacts with	WP_071107270_1 (interacts with) WP_027843178_1	false
934	interacts with	WP_071107270_1 (interacts with) WP_087539234_6	false
936	interacts with	WP_071107270_1 (interacts with) WP_017748579_1	false
937	interacts with	WP_071107270_1 (interacts with) WP_096689510_5	false
938	interacts with	WP_071107270_1 (interacts with) WP_027843178_2	false
940	interacts with	WP_071107270_1 (interacts with) OBQ01900_2	false
941	interacts with	WP_071107270_1 (interacts with) WP_089091039_3	false
943	interacts with	WP_071107270_1 (interacts with) WP_071107270_2	false
944	interacts with	WP_071107270_1 (interacts with) WP_138499827_4	false
945	interacts with	WP_071107270_1 (interacts with) WP_096537472_2	false
946	interacts with	WP_071107270_1 (interacts with) OBQ01900_3	false
948	interacts with	WP_071107270_1 (interacts with) WP_015210601_2	false
949	interacts with	WP_071107270_1 (interacts with) WP_068385845_3	false
950	interacts with	WP_071107270_1 (interacts with) WP_096689510_6	false
951	interacts with	WP_071107270_1 (interacts with) WP_027843178_3	false
953	interacts with	WP_071107270_1 (interacts with) WP_087542717_5	false
955	interacts with	WP_071107270_1 (interacts with) WP_099068319_7	false
957	interacts with	WP_071107270_1 (interacts with) BBD63560_1	false
958	interacts with	WP_015113151_4 (interacts with) WP_162399505_1	false
959	interacts with	WP_015113151_4 (interacts with) WP_096559014_1	false
960	interacts with	WP_015113151_4 (interacts with) WP_066383651_5	false
961	interacts with	WP_015113151_4 (interacts with) WP_096536886_5	false
962	interacts with	WP_015113151_4 (interacts with) WP_015212417_1	false
963	interacts with	WP_015113151_4 (interacts with) WP_006195640_4	false
964	interacts with	WP_015113151_4 (interacts with) WP_099071810_2	false
965	interacts with	WP_015113151_4 (interacts with) WP_015113151_1	false
966	interacts with	WP_015113151_4 (interacts with) WP_167725682_2	false
967	interacts with	WP_015113151_4 (interacts with) WP_096559014_5	false
968	interacts with	WP_015113151_4 (interacts with) BAZ29283_1	false
969	interacts with	WP_015113151_4 (interacts with) WP_096730381_2	false
970	interacts with	WP_015113151_4 (interacts with) WP_073639381_1	false
972	interacts with	WP_015113151_4 (interacts with) WP_138499068_4	false
973	interacts with	WP_015113151_4 (interacts with) CEJ45116_2	false
974	interacts with	WP_015113151_4 (interacts with) WP_062295185_1	false
975	interacts with	WP_015113151_4 (interacts with) WP_087539234_4	false
976	interacts with	WP_015113151_4 (interacts with) CEJ45116_5	false
977	interacts with	WP_015113151_4 (interacts with) WP_099071810_1	false
978	interacts with	WP_015113151_4 (interacts with) WP_009343975_1	false
979	interacts with	WP_015113151_4 (interacts with) TAE59458_3	false
980	interacts with	WP_015113151_4 (interacts with) WP_016950446_1	false
981	interacts with	WP_015113151_4 (interacts with) WP_087539234_7	false
982	interacts with	WP_015113151_4 (interacts with) WP_096559014_4	false
983	interacts with	WP_015113151_4 (interacts with) WP_013190203_1	false
984	interacts with	WP_015113151_4 (interacts with) WP_096575011_6	false
985	interacts with	WP_015113151_4 (interacts with) OBQ18754_2	false
986	interacts with	WP_015113151_4 (interacts with) WP_015212417_2	false
987	interacts with	WP_015113151_4 (interacts with) WP_011321056_1	false
988	interacts with	WP_015113151_4 (interacts with) WP_069073064_6	false
989	interacts with	WP_015113151_4 (interacts with) WP_071189061_3	false
990	interacts with	WP_015113151_4 (interacts with) RCJ30949_2	false
991	interacts with	WP_015113151_4 (interacts with) WP_069073064_1	false
992	interacts with	WP_015113151_4 (interacts with) CEJ45116_1	false
993	interacts with	WP_015113151_4 (interacts with) WP_096536886_1	false
994	interacts with	WP_015113151_4 (interacts with) TVP62740_1	false
995	interacts with	WP_015113151_4 (interacts with) BAZ29283_4	false
996	interacts with	WP_015113151_4 (interacts with) WP_096575011_3	false
997	interacts with	WP_015113151_4 (interacts with) WP_168496018_1	false
998	interacts with	WP_015113151_4 (interacts with) RCJ30949_4	false
999	interacts with	WP_015113151_4 (interacts with) WP_087539234_1	false
1001	interacts with	WP_015113151_4 (interacts with) WP_138499068_1	false
1002	interacts with	WP_015113151_4 (interacts with) WP_168645325_1	false
1003	interacts with	WP_015113151_4 (interacts with) WP_096681247_5	false
1004	interacts with	WP_015113151_4 (interacts with) WP_069073064_5	false
1005	interacts with	WP_015113151_4 (interacts with) RCJ14929_3	false
1006	interacts with	WP_015113151_4 (interacts with) WP_089091039_2	false
1007	interacts with	WP_015113151_4 (interacts with) WP_011321056_5	false
1009	interacts with	WP_015113151_4 (interacts with) WP_138499068_5	false
1010	interacts with	WP_015113151_4 (interacts with) BAZ29283_3	false
1011	interacts with	WP_015113151_4 (interacts with) OBQ36138_1	false
1012	interacts with	WP_015113151_4 (interacts with) WP_096569967_3	false
1013	interacts with	WP_015113151_4 (interacts with) WP_096569967_5	false
1014	interacts with	WP_015113151_4 (interacts with) TVP62740_6	false
1015	interacts with	WP_015113151_4 (interacts with) WP_044449859_1	false
1016	interacts with	WP_015113151_4 (interacts with) WP_096569967_4	false
1017	interacts with	WP_015113151_4 (interacts with) WP_006195640_2	false
1018	interacts with	WP_015113151_4 (interacts with) WP_168465654_1	false
1019	interacts with	WP_015113151_4 (interacts with) WP_073644071_5	false
1020	interacts with	WP_015113151_4 (interacts with) WP_071189061_2	false
1021	interacts with	WP_015113151_4 (interacts with) WP_096559014_8	false
1023	interacts with	WP_015113151_4 (interacts with) WP_044449859_3	false
1024	interacts with	WP_015113151_4 (interacts with) WP_006195640_7	false
1025	interacts with	WP_015113151_4 (interacts with) WP_066383651_2	false
1026	interacts with	WP_015113151_4 (interacts with) WP_089091039_3	false
1027	interacts with	WP_015113151_4 (interacts with) WP_096575011_2	false
1028	interacts with	WP_015113151_4 (interacts with) RCJ30949_5	false
1029	interacts with	WP_015113151_4 (interacts with) WP_099071810_6	false
1032	interacts with	AFY52807_3 (interacts with) AFY52807_4	false
1033	interacts with	AFY52807_3 (interacts with) WP_096537472_3	false
1035	interacts with	WP_169219633_2 (interacts with) WP_096689510_5	false
1036	interacts with	WP_169219633_2 (interacts with) WP_138499827_5	false
1037	interacts with	WP_169219633_2 (interacts with) WP_015197629_3	false
1038	interacts with	WP_169219633_2 (interacts with) WP_017314970_2	false
1039	interacts with	WP_169219633_2 (interacts with) WP_096537472_3	false
1040	interacts with	WP_169219633_2 (interacts with) WP_068385845_3	false
1041	interacts with	WP_169219633_2 (interacts with) WP_096689510_6	false
1042	interacts with	WP_169219633_2 (interacts with) WP_006197379_2	false
1043	interacts with	WP_169219633_2 (interacts with) WP_017314970_1	false
1045	interacts with	ANI93503_3 (interacts with) WP_068150862_2	false
1046	interacts with	ANI93503_3 (interacts with) WP_130878496_2	false
1048	interacts with	ANI93503_3 (interacts with) ANI93503_1	false
1050	interacts with	ANI93503_3 (interacts with) ANI93503_6	false
1051	interacts with	ANI93503_3 (interacts with) WP_157846946_2	false
1052	interacts with	ANI93503_3 (interacts with) WP_068150862_3	false
1054	interacts with	ANI93503_3 (interacts with) WP_125821548_1	false
1056	interacts with	ANI93503_3 (interacts with) WP_051840628_1	false
1059	interacts with	WP_128433866_2 (interacts with) WP_153461219_4	false
1060	interacts with	WP_128433866_2 (interacts with) WP_155349848_3	false
1062	interacts with	WP_128433866_2 (interacts with) WP_139627778_2	false
1063	interacts with	WP_128433866_2 (interacts with) WP_125821548_1	false
1065	interacts with	WP_128433866_2 (interacts with) WP_017198207_3	false
1066	interacts with	WP_128433866_2 (interacts with) WP_130878496_5	false
1068	interacts with	WP_128433866_2 (interacts with) WP_068210304_3	false
1070	interacts with	WP_128433866_2 (interacts with) WP_155862233_4	false
1072	interacts with	WP_128433866_2 (interacts with) WP_141936425_3	false
1074	interacts with	WP_128433866_2 (interacts with) WP_054237388_3	false
1076	interacts with	WP_128433866_2 (interacts with) WP_051851944_3	false
1078	interacts with	WP_128433866_2 (interacts with) WP_068210304_1	false
1079	interacts with	WP_128433866_2 (interacts with) WP_051840628_1	false
1080	interacts with	WP_128433866_2 (interacts with) WP_133890759_3	false
1082	interacts with	WP_128433866_2 (interacts with) WP_141936425_2	false
1084	interacts with	WP_128433866_2 (interacts with) WP_071383933_2	false
1086	interacts with	WP_128433866_2 (interacts with) WP_164312175_3	false
1088	interacts with	WP_128433866_2 (interacts with) AGP61345_4	false
1089	interacts with	WP_128433866_2 (interacts with) WP_133890759_2	false
1091	interacts with	WP_128433866_2 (interacts with) WP_083744359_2	false
1092	interacts with	WP_128433866_2 (interacts with) WP_060892878_4	false
1094	interacts with	WP_128433866_2 (interacts with) WP_030169499_4	false
1095	interacts with	WP_128433866_2 (interacts with) WP_136238412_3	false
1097	interacts with	WP_128433866_2 (interacts with) WP_153461219_3	false
1098	interacts with	WP_088242795_2 (interacts with) WP_035150190_4	false
1099	interacts with	WP_088242795_2 (interacts with) WP_162399505_1	false
1100	interacts with	WP_088242795_2 (interacts with) WP_087539234_1	false
1101	interacts with	WP_088242795_2 (interacts with) WP_096728455_2	false
1102	interacts with	WP_088242795_2 (interacts with) WP_124155194_2	false
1103	interacts with	WP_088242795_2 (interacts with) WP_011610106_2	false
1104	interacts with	WP_088242795_2 (interacts with) WP_137906310_1	false
1105	interacts with	WP_088242795_2 (interacts with) WP_015216084_5	false
1106	interacts with	WP_088242795_2 (interacts with) WP_104387267_1	false
1108	interacts with	WP_088242795_2 (interacts with) BAY08128_2	false
1109	interacts with	WP_088242795_2 (interacts with) WP_069073064_4	false
1110	interacts with	WP_088242795_2 (interacts with) WP_167725682_2	false
1111	interacts with	WP_088242795_2 (interacts with) BAZ29283_1	false
1113	interacts with	WP_088242795_2 (interacts with) WP_015216084_4	false
1114	interacts with	WP_088242795_2 (interacts with) WP_069073064_5	false
1115	interacts with	WP_088242795_2 (interacts with) WP_038089561_2	false
1116	interacts with	WP_088242795_2 (interacts with) RCJ14929_1	false
1117	interacts with	WP_088242795_2 (interacts with) WP_096730381_2	false
1118	interacts with	WP_088242795_2 (interacts with) WP_015113151_4	false
1119	interacts with	WP_088242795_2 (interacts with) WP_073639381_1	false
1121	interacts with	WP_088242795_2 (interacts with) WP_086689015_2	false
1122	interacts with	WP_088242795_2 (interacts with) BAZ29283_3	false
1123	interacts with	WP_088242795_2 (interacts with) WP_073644071_4	false
1124	interacts with	WP_088242795_2 (interacts with) OBQ36138_1	false
1126	interacts with	WP_088242795_2 (interacts with) BAY08128_1	false
1127	interacts with	WP_088242795_2 (interacts with) WP_087539234_3	false
1128	interacts with	WP_088242795_2 (interacts with) WP_087539234_4	false
1129	interacts with	WP_088242795_2 (interacts with) WP_038089561_4	false
1131	interacts with	WP_088242795_2 (interacts with) WP_168357543_1	false
1132	interacts with	WP_088242795_2 (interacts with) TAE59458_1	false
1133	interacts with	WP_088242795_2 (interacts with) TAE59458_3	false
1134	interacts with	WP_088242795_2 (interacts with) WP_087539234_7	false
1135	interacts with	WP_088242795_2 (interacts with) WP_044449859_1	false
1137	interacts with	WP_088242795_2 (interacts with) WP_015127932_4	false
1138	interacts with	WP_088242795_2 (interacts with) WP_073644071_5	false
1139	interacts with	WP_088242795_2 (interacts with) WP_096575011_6	false
1140	interacts with	WP_088242795_2 (interacts with) WP_096689510_2	false
1142	interacts with	WP_088242795_2 (interacts with) WP_027402982_2	false
1143	interacts with	WP_088242795_2 (interacts with) WP_044449859_3	false
1145	interacts with	WP_088242795_2 (interacts with) WP_017314970_3	false
1146	interacts with	WP_088242795_2 (interacts with) WP_012595952_5	false
1147	interacts with	WP_088242795_2 (interacts with) WP_138499827_5	false
1148	interacts with	WP_088242795_2 (interacts with) WP_069073064_6	false
1149	interacts with	WP_088242795_2 (interacts with) OBQ01900_2	false
1151	interacts with	WP_088242795_2 (interacts with) RCJ40334_5	false
1152	interacts with	WP_088242795_2 (interacts with) WP_015155263_3	false
1153	interacts with	WP_088242795_2 (interacts with) WP_069073064_1	false
1155	interacts with	WP_088242795_2 (interacts with) WP_017314970_4	false
1156	interacts with	WP_088242795_2 (interacts with) WP_096730381_1	false
1157	interacts with	WP_088242795_2 (interacts with) WP_015210601_2	false
1158	interacts with	WP_088242795_2 (interacts with) WP_096620064_1	false
1159	interacts with	WP_088242795_2 (interacts with) WP_017314970_2	false
1160	interacts with	WP_088242795_2 (interacts with) WP_099071810_6	false
1161	interacts with	WP_088242795_2 (interacts with) BAZ29283_4	false
1162	interacts with	WP_088242795_2 (interacts with) WP_096536886_4	false
1163	interacts with	WP_088242795_2 (interacts with) WP_096536886_1	false
1164	interacts with	WP_088242795_2 (interacts with) WP_168496018_1	false
1165	interacts with	WP_088242795_2 (interacts with) WP_017314970_1	false
1167	interacts with	WP_088242795_2 (interacts with) WP_167725682_4	false
1170	interacts with	WP_104296401_5 (interacts with) WP_142936832_1	false
1172	interacts with	WP_104296401_5 (interacts with) SLE69095_1	false
1174	interacts with	WP_104296401_5 (interacts with) SLE69095_3	false
1176	interacts with	WP_104296401_5 (interacts with) WP_166841243_1	false
1178	interacts with	WP_104296401_5 (interacts with) WP_091465037_2	false
1179	interacts with	WP_104296401_5 (interacts with) WP_164312175_3	false
1181	interacts with	WP_104296401_5 (interacts with) WP_133616643_3	false
1182	interacts with	WP_104296401_5 (interacts with) AGP61345_4	false
1184	interacts with	WP_104296401_5 (interacts with) AGP61345_5	false
1186	interacts with	WP_104296401_5 (interacts with) AOX46105_2	false
1188	interacts with	WP_104296401_5 (interacts with) WP_062071413_1	false
1189	interacts with	WP_104296401_5 (interacts with) WP_054237388_3	false
1191	interacts with	WP_104296401_5 (interacts with) AFR27446_2	false
1193	interacts with	WP_073644071_1 (interacts with) WP_162399505_1	false
1194	interacts with	WP_073644071_1 (interacts with) WP_096559014_1	false
1195	interacts with	WP_073644071_1 (interacts with) WP_066383651_5	false
1196	interacts with	WP_073644071_1 (interacts with) WP_015216084_5	false
1197	interacts with	WP_073644071_1 (interacts with) WP_103136595_2	false
1198	interacts with	WP_073644071_1 (interacts with) TVP62740_2	false
1199	interacts with	WP_073644071_1 (interacts with) WP_069073064_4	false
1200	interacts with	WP_073644071_1 (interacts with) WP_096536886_5	false
1201	interacts with	WP_073644071_1 (interacts with) WP_015212417_1	false
1202	interacts with	WP_073644071_1 (interacts with) WP_006195640_4	false
1203	interacts with	WP_073644071_1 (interacts with) WP_099071810_2	false
1204	interacts with	WP_073644071_1 (interacts with) WP_015113151_1	false
1205	interacts with	WP_073644071_1 (interacts with) WP_096559014_5	false
1206	interacts with	WP_073644071_1 (interacts with) WP_009343975_2	false
1207	interacts with	WP_073644071_1 (interacts with) BAZ29283_1	false
1208	interacts with	WP_073644071_1 (interacts with) WP_089091039_1	false
1209	interacts with	WP_073644071_1 (interacts with) WP_038089561_2	false
1210	interacts with	WP_073644071_1 (interacts with) WP_073639381_1	false
1211	interacts with	WP_073644071_1 (interacts with) WP_015113151_4	false
1212	interacts with	WP_073644071_1 (interacts with) WP_057178590_1	false
1213	interacts with	WP_073644071_1 (interacts with) WP_096575011_4	false
1214	interacts with	WP_073644071_1 (interacts with) WP_088242795_2	false
1215	interacts with	WP_073644071_1 (interacts with) CEJ45116_2	false
1216	interacts with	WP_073644071_1 (interacts with) WP_062295185_1	false
1217	interacts with	WP_073644071_1 (interacts with) WP_087539234_4	false
1218	interacts with	WP_073644071_1 (interacts with) CEJ45116_5	false
1219	interacts with	WP_073644071_1 (interacts with) WP_015212417_3	false
1220	interacts with	WP_073644071_1 (interacts with) TAE59458_1	false
1221	interacts with	WP_073644071_1 (interacts with) WP_099071810_1	false
1222	interacts with	WP_073644071_1 (interacts with) WP_009343975_1	false
1223	interacts with	WP_073644071_1 (interacts with) WP_087539234_7	false
1224	interacts with	WP_073644071_1 (interacts with) WP_016950446_1	false
1225	interacts with	WP_073644071_1 (interacts with) WP_096559014_4	false
1226	interacts with	WP_073644071_1 (interacts with) WP_016950446_3	false
1227	interacts with	WP_073644071_1 (interacts with) WP_013190203_1	false
1228	interacts with	WP_073644071_1 (interacts with) WP_096575011_6	false
1229	interacts with	WP_073644071_1 (interacts with) OBQ18754_2	false
1230	interacts with	WP_073644071_1 (interacts with) WP_015212417_2	false
1231	interacts with	WP_073644071_1 (interacts with) WP_011321056_1	false
1233	interacts with	WP_073644071_1 (interacts with) WP_096664869_2	false
1234	interacts with	WP_073644071_1 (interacts with) WP_071189061_3	false
1235	interacts with	WP_073644071_1 (interacts with) RCJ30949_2	false
1236	interacts with	WP_073644071_1 (interacts with) WP_089091039_4	false
1237	interacts with	WP_073644071_1 (interacts with) WP_069073064_1	false
1238	interacts with	WP_073644071_1 (interacts with) CEJ45116_1	false
1239	interacts with	WP_073644071_1 (interacts with) WP_062295185_6	false
1240	interacts with	WP_073644071_1 (interacts with) BAZ29283_4	false
1241	interacts with	WP_073644071_1 (interacts with) TVP62740_1	false
1242	interacts with	WP_073644071_1 (interacts with) WP_096536886_1	false
1243	interacts with	WP_073644071_1 (interacts with) WP_096536886_4	false
1244	interacts with	WP_073644071_1 (interacts with) WP_168496018_1	false
1245	interacts with	WP_073644071_1 (interacts with) WP_096575011_3	false
1246	interacts with	WP_073644071_1 (interacts with) RCJ30949_6	false
1247	interacts with	WP_073644071_1 (interacts with) RCJ30949_4	false
1248	interacts with	WP_073644071_1 (interacts with) WP_138499068_1	false
1249	interacts with	WP_073644071_1 (interacts with) WP_137906310_1	false
1250	interacts with	WP_073644071_1 (interacts with) WP_104387267_1	false
1251	interacts with	WP_073644071_1 (interacts with) WP_168645325_1	false
1252	interacts with	WP_073644071_1 (interacts with) WP_069073064_5	false
1253	interacts with	WP_073644071_1 (interacts with) WP_096559014_6	false
1254	interacts with	WP_073644071_1 (interacts with) RCJ14929_3	false
1255	interacts with	WP_073644071_1 (interacts with) RCJ14929_1	false
1256	interacts with	WP_073644071_1 (interacts with) WP_089091039_2	false
1257	interacts with	WP_073644071_1 (interacts with) WP_138499068_5	false
1258	interacts with	WP_073644071_1 (interacts with) BAZ29283_3	false
1259	interacts with	WP_073644071_1 (interacts with) WP_073644071_4	false
1260	interacts with	WP_073644071_1 (interacts with) WP_162399505_4	false
1261	interacts with	WP_073644071_1 (interacts with) OBQ36138_1	false
1262	interacts with	WP_073644071_1 (interacts with) WP_096569967_3	false
1263	interacts with	WP_073644071_1 (interacts with) WP_006195640_9	false
1264	interacts with	WP_073644071_1 (interacts with) WP_087539234_3	false
1265	interacts with	WP_073644071_1 (interacts with) WP_096569967_5	false
1266	interacts with	WP_073644071_1 (interacts with) WP_006195640_5	false
1267	interacts with	WP_073644071_1 (interacts with) TVP62740_6	false
1268	interacts with	WP_073644071_1 (interacts with) WP_006195640_8	false
1269	interacts with	WP_073644071_1 (interacts with) WP_096569967_4	false
1270	interacts with	WP_073644071_1 (interacts with) WP_044449859_1	false
1271	interacts with	WP_073644071_1 (interacts with) WP_012597836_7	false
1272	interacts with	WP_073644071_1 (interacts with) WP_062295185_4	false
1273	interacts with	WP_073644071_1 (interacts with) WP_006195640_2	false
1274	interacts with	WP_073644071_1 (interacts with) WP_015127932_4	false
1275	interacts with	WP_073644071_1 (interacts with) WP_168465654_1	false
1276	interacts with	WP_073644071_1 (interacts with) WP_073644071_5	false
1277	interacts with	WP_073644071_1 (interacts with) WP_071189061_2	false
1278	interacts with	WP_073644071_1 (interacts with) WP_096559014_8	false
1279	interacts with	WP_073644071_1 (interacts with) WP_006195640_7	false
1280	interacts with	WP_073644071_1 (interacts with) WP_066383651_2	false
1281	interacts with	WP_073644071_1 (interacts with) WP_089091039_3	false
1282	interacts with	WP_073644071_1 (interacts with) WP_073644071_2	false
1283	interacts with	WP_073644071_1 (interacts with) WP_073644071_8	false
1284	interacts with	WP_073644071_1 (interacts with) WP_015155263_3	false
1285	interacts with	WP_073644071_1 (interacts with) WP_096730381_1	false
1286	interacts with	WP_073644071_1 (interacts with) WP_015210601_2	false
1287	interacts with	WP_073644071_1 (interacts with) WP_096575011_2	false
1288	interacts with	WP_073644071_1 (interacts with) RCJ30949_5	false
1289	interacts with	WP_073644071_1 (interacts with) WP_099071810_6	false
1291	interacts with	WP_086760950_12 (interacts with) WP_012597836_5	false
1293	interacts with	TVP63782_5 (interacts with) AVH79456_4	false
1294	interacts with	TVP63782_5 (interacts with) RCJ19623_5	false
1296	interacts with	TVP63782_5 (interacts with) WP_171977306_3	false
1297	interacts with	TVP63782_5 (interacts with) WP_015216084_5	false
1298	interacts with	TVP63782_5 (interacts with) WP_012597836_5	false
1299	interacts with	TVP63782_5 (interacts with) AVH79535_6	false
1300	interacts with	TVP63782_5 (interacts with) WP_015216084_10	false
1301	interacts with	TVP63782_5 (interacts with) WP_012597836_4	false
1302	interacts with	TVP63782_5 (interacts with) WP_124970176_14	false
1303	interacts with	TVP63782_5 (interacts with) WP_106289349_2	false
1305	interacts with	TVP63782_5 (interacts with) WP_106300787_3	false
1307	interacts with	BAZ42602_5 (interacts with) RCJ30949_4	false
1308	interacts with	BAZ42602_5 (interacts with) WP_124155194_2	false
1309	interacts with	BAZ42602_5 (interacts with) WP_011610106_2	false
1310	interacts with	BAZ42602_5 (interacts with) WP_138498533_4	false
1311	interacts with	BAZ42602_5 (interacts with) BAZ42602_1	false
1312	interacts with	BAZ42602_5 (interacts with) WP_167721203_3	false
1314	interacts with	BAZ42602_5 (interacts with) AVH79535_8	false
1315	interacts with	BAZ42602_5 (interacts with) WP_087542717_3	false
1316	interacts with	BAZ42602_5 (interacts with) WP_019495762_1	false
1317	interacts with	BAZ42602_5 (interacts with) WP_012597836_5	false
1318	interacts with	BAZ42602_5 (interacts with) WP_012597836_4	false
1319	interacts with	BAZ42602_5 (interacts with) WP_109013279_1	false
1320	interacts with	BAZ42602_5 (interacts with) RCJ19623_1	false
1321	interacts with	BAZ42602_5 (interacts with) WP_087592205_6	false
1322	interacts with	BAZ42602_5 (interacts with) WP_127086205_3	false
1323	interacts with	BAZ42602_5 (interacts with) WP_106300787_3	false
1324	interacts with	BAZ42602_5 (interacts with) WP_019501037_1	false
1325	interacts with	BAZ42602_5 (interacts with) WP_127086205_4	false
1326	interacts with	BAZ42602_5 (interacts with) WP_168643398_4	false
1328	interacts with	BAZ42602_5 (interacts with) WP_019496925_3	false
1329	interacts with	BAZ42602_5 (interacts with) WP_087542717_2	false
1330	interacts with	BAZ42602_5 (interacts with) WP_168465654_1	false
1332	interacts with	BAZ42602_5 (interacts with) WP_019501955_12	false
1333	interacts with	BAZ42602_5 (interacts with) WP_124970176_14	false
1334	interacts with	BAZ42602_5 (interacts with) WP_017748579_3	false
1335	interacts with	BAZ42602_5 (interacts with) OBQ18754_2	false
1336	interacts with	BAZ42602_5 (interacts with) WP_006197379_2	false
1337	interacts with	BAZ42602_5 (interacts with) WP_138499827_1	false
1338	interacts with	BAZ42602_5 (interacts with) WP_002735885_4	false
1339	interacts with	BAZ42602_5 (interacts with) WP_096689510_5	false
1340	interacts with	BAZ42602_5 (interacts with) WP_012595952_5	false
1341	interacts with	BAZ42602_5 (interacts with) WP_138499827_5	false
1342	interacts with	BAZ42602_5 (interacts with) TRT88208_1	false
1343	interacts with	BAZ42602_5 (interacts with) WP_012409787_3	false
1345	interacts with	BAZ42602_5 (interacts with) WP_044206131_2	false
1346	interacts with	BAZ42602_5 (interacts with) AVH79607_2	false
1347	interacts with	BAZ42602_5 (interacts with) WP_138499827_4	false
1348	interacts with	BAZ42602_5 (interacts with) WP_086835908_1	false
1349	interacts with	BAZ42602_5 (interacts with) OBQ01900_3	false
1350	interacts with	BAZ42602_5 (interacts with) RCJ30949_5	false
1352	interacts with	BAZ42602_5 (interacts with) AVH79607_5	false
1353	interacts with	BAZ42602_5 (interacts with) WP_096689510_6	false
1354	interacts with	BAZ42602_5 (interacts with) WP_127078868_1	false
1355	interacts with	BAZ42602_5 (interacts with) WP_096688632_1	false
1356	interacts with	AGP61345_5 (interacts with) WP_153461219_4	false
1357	interacts with	AGP61345_5 (interacts with) WP_155349848_2	false
1359	interacts with	AGP61345_5 (interacts with) WP_155358788_3	false
1360	interacts with	AGP61345_5 (interacts with) WP_125821548_1	false
1361	interacts with	AGP61345_5 (interacts with) WP_164312175_3	false
1363	interacts with	AGP61345_5 (interacts with) WP_086829041_1	false
1365	interacts with	AGP61345_5 (interacts with) WP_164312175_2	false
1367	interacts with	AGP61345_5 (interacts with) WP_059262025_2	false
1368	interacts with	AGP61345_5 (interacts with) AGP61345_4	false
1370	interacts with	AGP61345_5 (interacts with) WP_073726342_1	false
1372	interacts with	AGP61345_5 (interacts with) WP_054237388_4	false
1373	interacts with	AGP61345_5 (interacts with) WP_141936425_3	false
1374	interacts with	AGP61345_5 (interacts with) WP_054237388_3	false
1375	interacts with	AGP61345_5 (interacts with) WP_136238412_3	false
1376	interacts with	AGP61345_5 (interacts with) WP_051840628_1	false
1377	interacts with	CEJ45116_2 (interacts with) WP_096559014_1	false
1378	interacts with	CEJ45116_2 (interacts with) WP_096536886_5	false
1379	interacts with	WP_086760950_11 (interacts with) WP_099700413_2	false
1380	interacts with	WP_086760950_11 (interacts with) WP_096689510_6	false
1381	interacts with	WP_086760950_11 (interacts with) WP_096589596_10	false
1382	interacts with	CEJ45116_5 (interacts with) WP_096559014_1	false
1383	interacts with	CEJ45116_5 (interacts with) WP_104387267_1	false
1384	interacts with	CEJ45116_5 (interacts with) WP_096536886_5	false
1386	interacts with	CEJ45116_5 (interacts with) WP_086769105_2	false
1387	interacts with	CEJ45116_5 (interacts with) WP_057178590_1	false
1389	interacts with	CEJ45116_5 (interacts with) TAE59458_2	false
1390	interacts with	CEJ45116_5 (interacts with) WP_096575011_4	false
1391	interacts with	CEJ45116_5 (interacts with) WP_087539234_3	false
1392	interacts with	CEJ45116_5 (interacts with) CEJ45116_2	false
1393	interacts with	CEJ45116_5 (interacts with) WP_087539234_4	false
1394	interacts with	CEJ45116_5 (interacts with) TAE59458_3	false
1396	interacts with	CEJ45116_5 (interacts with) WP_089091039_5	false
1397	interacts with	CEJ45116_5 (interacts with) WP_006197379_2	false
1398	interacts with	CEJ45116_5 (interacts with) WP_086835908_1	false
1399	interacts with	CEJ45116_5 (interacts with) OBQ01900_3	false
1400	interacts with	CEJ45116_5 (interacts with) WP_062295185_6	false
1401	interacts with	CEJ45116_5 (interacts with) WP_168496018_1	false
1402	interacts with	CEJ45116_5 (interacts with) WP_096575011_3	false
1403	interacts with	WP_015212417_3 (interacts with) WP_162399505_1	false
1404	interacts with	WP_015212417_3 (interacts with) WP_096559014_1	false
1405	interacts with	WP_015212417_3 (interacts with) WP_066383651_5	false
1406	interacts with	WP_015212417_3 (interacts with) WP_096536886_5	false
1407	interacts with	WP_015212417_3 (interacts with) WP_015212417_1	false
1408	interacts with	WP_015212417_3 (interacts with) WP_006195640_4	false
1409	interacts with	WP_015212417_3 (interacts with) WP_099071810_2	false
1410	interacts with	WP_015212417_3 (interacts with) WP_015113151_1	false
1411	interacts with	WP_015212417_3 (interacts with) WP_167725682_2	false
1412	interacts with	WP_015212417_3 (interacts with) WP_096559014_5	false
1413	interacts with	WP_015212417_3 (interacts with) BAZ29283_1	false
1414	interacts with	WP_015212417_3 (interacts with) WP_096730381_2	false
1415	interacts with	WP_015212417_3 (interacts with) WP_073639381_1	false
1416	interacts with	WP_015212417_3 (interacts with) WP_015113151_4	false
1417	interacts with	WP_015212417_3 (interacts with) WP_026100063_2	false
1418	interacts with	WP_015212417_3 (interacts with) WP_138499068_4	false
1419	interacts with	WP_015212417_3 (interacts with) CEJ45116_2	false
1420	interacts with	WP_015212417_3 (interacts with) WP_062295185_1	false
1421	interacts with	WP_015212417_3 (interacts with) WP_087539234_4	false
1422	interacts with	WP_015212417_3 (interacts with) WP_099071810_1	false
1423	interacts with	WP_015212417_3 (interacts with) WP_009343975_1	false
1424	interacts with	WP_015212417_3 (interacts with) TAE59458_3	false
1425	interacts with	WP_015212417_3 (interacts with) WP_016950446_1	false
1426	interacts with	WP_015212417_3 (interacts with) WP_096559014_4	false
1427	interacts with	WP_015212417_3 (interacts with) WP_013190203_1	false
1428	interacts with	WP_015212417_3 (interacts with) WP_096575011_6	false
1429	interacts with	WP_015212417_3 (interacts with) OBQ18754_2	false
1430	interacts with	WP_015212417_3 (interacts with) WP_015212417_2	false
1431	interacts with	WP_015212417_3 (interacts with) WP_011321056_1	false
1432	interacts with	WP_015212417_3 (interacts with) WP_069073064_6	false
1433	interacts with	WP_015212417_3 (interacts with) RCJ30949_2	false
1434	interacts with	WP_015212417_3 (interacts with) WP_071189061_3	false
1435	interacts with	WP_015212417_3 (interacts with) WP_086769105_3	false
1436	interacts with	WP_015212417_3 (interacts with) WP_069073064_1	false
1437	interacts with	WP_015212417_3 (interacts with) CEJ45116_1	false
1439	interacts with	WP_015212417_3 (interacts with) WP_012409362_6	false
1440	interacts with	WP_015212417_3 (interacts with) WP_096536886_1	false
1441	interacts with	WP_015212417_3 (interacts with) TVP62740_1	false
1442	interacts with	WP_015212417_3 (interacts with) BAZ29283_4	false
1443	interacts with	WP_015212417_3 (interacts with) WP_017314970_1	false
1444	interacts with	WP_015212417_3 (interacts with) WP_096575011_3	false
1445	interacts with	WP_015212417_3 (interacts with) WP_168496018_1	false
1446	interacts with	WP_015212417_3 (interacts with) RCJ30949_4	false
1447	interacts with	WP_015212417_3 (interacts with) WP_087539234_1	false
1448	interacts with	WP_015212417_3 (interacts with) WP_138499068_1	false
1450	interacts with	WP_015212417_3 (interacts with) WP_026100063_3	false
1451	interacts with	WP_015212417_3 (interacts with) WP_168645325_1	false
1452	interacts with	WP_015212417_3 (interacts with) WP_096681247_5	false
1453	interacts with	WP_015212417_3 (interacts with) WP_069073064_5	false
1454	interacts with	WP_015212417_3 (interacts with) RCJ14929_3	false
1455	interacts with	WP_015212417_3 (interacts with) WP_089091039_2	false
1456	interacts with	WP_015212417_3 (interacts with) WP_011321056_5	false
1457	interacts with	WP_015212417_3 (interacts with) WP_138499068_5	false
1458	interacts with	WP_015212417_3 (interacts with) BAZ29283_3	false
1459	interacts with	WP_015212417_3 (interacts with) OBQ36138_1	false
1460	interacts with	WP_015212417_3 (interacts with) WP_096569967_3	false
1461	interacts with	WP_015212417_3 (interacts with) WP_096569967_5	false
1462	interacts with	WP_015212417_3 (interacts with) TVP62740_6	false
1463	interacts with	WP_015212417_3 (interacts with) WP_096681247_2	false
1465	interacts with	WP_015212417_3 (interacts with) WP_012409362_8	false
1466	interacts with	WP_015212417_3 (interacts with) WP_096569967_4	false
1467	interacts with	WP_015212417_3 (interacts with) WP_044449859_1	false
1468	interacts with	WP_015212417_3 (interacts with) WP_006195640_2	false
1469	interacts with	WP_015212417_3 (interacts with) WP_168465654_1	false
1470	interacts with	WP_015212417_3 (interacts with) WP_073644071_5	false
1471	interacts with	WP_015212417_3 (interacts with) WP_071189061_2	false
1472	interacts with	WP_015212417_3 (interacts with) WP_096559014_8	false
1473	interacts with	WP_015212417_3 (interacts with) WP_015197629_1	false
1475	interacts with	WP_015212417_3 (interacts with) WP_012409362_5	false
1476	interacts with	WP_015212417_3 (interacts with) WP_027402982_2	false
1477	interacts with	WP_015212417_3 (interacts with) WP_006195640_7	false
1478	interacts with	WP_015212417_3 (interacts with) WP_066383651_2	false
1479	interacts with	WP_015212417_3 (interacts with) WP_089091039_3	false
1480	interacts with	WP_015212417_3 (interacts with) WP_017314970_2	false
1481	interacts with	WP_015212417_3 (interacts with) WP_096575011_2	false
1482	interacts with	WP_015212417_3 (interacts with) RCJ30949_5	false
1483	interacts with	WP_015212417_3 (interacts with) WP_099071810_6	false
1484	interacts with	WP_015212417_3 (interacts with) WP_066383651_4	false
1486	interacts with	WP_015210601_6 (interacts with) WP_015113151_6	false
1488	interacts with	WP_015210601_6 (interacts with) WP_096559014_7	false
1490	interacts with	WP_015210601_6 (interacts with) WP_138499068_8	false
1492	interacts with	WP_015210601_6 (interacts with) RCJ30949_9	false
1493	interacts with	WP_015210601_6 (interacts with) WP_096664869_5	false
1495	interacts with	WP_015210601_6 (interacts with) WP_012409362_9	false
1496	interacts with	WP_015210601_6 (interacts with) OBQ18754_2	false
1497	interacts with	WP_015210601_6 (interacts with) WP_015078657_10	false
1498	interacts with	WP_015210601_6 (interacts with) WP_069073064_6	false
1499	interacts with	WP_015210601_6 (interacts with) WP_162399505_5	false
1500	interacts with	WP_015210601_6 (interacts with) WP_069073064_1	false
1502	interacts with	WP_015210601_6 (interacts with) CEJ45116_6	false
1503	interacts with	WP_015210601_6 (interacts with) BAZ29283_3	false
1504	interacts with	WP_015210601_6 (interacts with) WP_148763415_5	false
1505	interacts with	WP_015210601_6 (interacts with) WP_015210601_2	false
1507	interacts with	WP_015210601_6 (interacts with) TVP62740_4	false
1508	interacts with	WP_015210601_6 (interacts with) WP_038089561_4	false
1510	interacts with	TAG67909_1 (interacts with) WP_099068319_4	false
1511	interacts with	TAG67909_1 (interacts with) WP_035150190_4	false
1513	interacts with	TAG67909_1 (interacts with) AVH79535_1	false
1514	interacts with	TAG67909_1 (interacts with) WP_138498533_4	false
1515	interacts with	TAG67909_1 (interacts with) BAZ42602_1	false
1517	interacts with	TAG67909_1 (interacts with) WP_171977306_1	false
1518	interacts with	TAG67909_1 (interacts with) WP_099068319_2	false
1519	interacts with	TAG67909_1 (interacts with) RCJ40850_1	false
1521	interacts with	TAG67909_1 (interacts with) RCJ19623_2	false
1523	interacts with	TAG67909_1 (interacts with) WP_096688632_7	false
1525	interacts with	TAG67909_1 (interacts with) WP_099700413_1	false
1526	interacts with	TAG67909_1 (interacts with) BBD63560_4	false
1527	interacts with	TAG67909_1 (interacts with) WP_053455886_1	false
1528	interacts with	TAG67909_1 (interacts with) WP_068385845_2	false
1530	interacts with	TAG67909_1 (interacts with) WP_163927072_2	false
1531	interacts with	TAG67909_1 (interacts with) WP_017318973_3	false
1532	interacts with	TAG67909_1 (interacts with) WP_015207767_1	false
1533	interacts with	TAG67909_1 (interacts with) WP_019495762_1	false
1534	interacts with	TAG67909_1 (interacts with) WP_012597836_5	false
1535	interacts with	TAG67909_1 (interacts with) AVH79535_6	false
1536	interacts with	TAG67909_1 (interacts with) WP_012597836_4	false
1537	interacts with	TAG67909_1 (interacts with) WP_096589596_10	false
1538	interacts with	TAG67909_1 (interacts with) WP_109013279_1	false
1539	interacts with	TAG67909_1 (interacts with) BBD63560_3	false
1540	interacts with	TAG67909_1 (interacts with) WP_096537472_3	false
1542	interacts with	TAG67909_1 (interacts with) WP_138498533_3	false
1543	interacts with	TAG67909_1 (interacts with) BAZ42602_5	false
1544	interacts with	TAG67909_1 (interacts with) WP_087592205_6	false
1545	interacts with	TAG67909_1 (interacts with) WP_086760950_11	false
1546	interacts with	TAG67909_1 (interacts with) WP_127086205_3	false
1547	interacts with	TAG67909_1 (interacts with) WP_015207763_1	false
1548	interacts with	TAG67909_1 (interacts with) WP_127086205_4	false
1549	interacts with	TAG67909_1 (interacts with) WP_168643398_4	false
1551	interacts with	TAG67909_1 (interacts with) WP_096688632_5	false
1553	interacts with	TAG67909_1 (interacts with) WP_106371152_5	false
1555	interacts with	TAG67909_1 (interacts with) WP_138499827_3	false
1556	interacts with	TAG67909_1 (interacts with) WP_012597836_7	false
1557	interacts with	TAG67909_1 (interacts with) WP_099700413_4	false
1559	interacts with	TAG67909_1 (interacts with) WP_019496925_1	false
1560	interacts with	TAG67909_1 (interacts with) WP_124970176_14	false
1562	interacts with	TAG67909_1 (interacts with) WP_124970176_9	false
1563	interacts with	TAG67909_1 (interacts with) WP_106240815_2	false
1564	interacts with	TAG67909_1 (interacts with) WP_006197379_2	false
1565	interacts with	TAG67909_1 (interacts with) WP_096537472_5	false
1566	interacts with	TAG67909_1 (interacts with) WP_138499827_1	false
1567	interacts with	TAG67909_1 (interacts with) WP_106300787_1	false
1568	interacts with	TAG67909_1 (interacts with) WP_002735885_4	false
1569	interacts with	TAG67909_1 (interacts with) WP_096689510_5	false
1570	interacts with	TAG67909_1 (interacts with) WP_012595952_5	false
1571	interacts with	TAG67909_1 (interacts with) WP_138499827_5	false
1572	interacts with	TAG67909_1 (interacts with) WP_099700413_2	false
1573	interacts with	TAG67909_1 (interacts with) OBQ01900_2	false
1574	interacts with	TAG67909_1 (interacts with) WP_012409787_3	false
1575	interacts with	TAG67909_1 (interacts with) WP_086769105_3	false
1577	interacts with	TAG67909_1 (interacts with) WP_106289349_3	false
1578	interacts with	TAG67909_1 (interacts with) WP_071107270_2	false
1579	interacts with	TAG67909_1 (interacts with) WP_138499827_4	false
1581	interacts with	TAG67909_1 (interacts with) WP_035150190_3	false
1582	interacts with	TAG67909_1 (interacts with) WP_096689510_6	false
1583	interacts with	TAG67909_1 (interacts with) WP_068385845_3	false
1584	interacts with	TAG67909_1 (interacts with) WP_127078868_1	false
1585	interacts with	TAG67909_1 (interacts with) WP_099068319_6	false
1587	interacts with	TAG67909_1 (interacts with) WP_087592205_11	false
1589	interacts with	TAG67909_1 (interacts with) WP_138499827_2	false
1590	interacts with	TAG67909_1 (interacts with) BBD63560_1	false
1592	interacts with	WP_066371470_4 (interacts with) WP_062346719_1	false
1593	interacts with	WP_066371470_4 (interacts with) WP_155349848_2	false
1595	interacts with	WP_066371470_4 (interacts with) WP_062339008_1	false
1597	interacts with	WP_066371470_4 (interacts with) WP_062339008_3	false
1598	interacts with	WP_066371470_4 (interacts with) WP_155349848_3	false
1600	interacts with	WP_066371470_4 (interacts with) WP_066371470_3	false
1601	interacts with	WP_066371470_4 (interacts with) WP_066371470_6	false
1602	interacts with	WP_066371470_4 (interacts with) WP_155358788_2	false
1603	interacts with	WP_066371470_4 (interacts with) WP_062339008_4	false
1604	interacts with	WP_066371470_4 (interacts with) WP_066371470_2	false
1605	interacts with	WP_066371470_4 (interacts with) WP_155358788_3	false
1607	interacts with	WP_066371470_4 (interacts with) WP_155349848_1	false
1608	interacts with	WP_066371470_4 (interacts with) WP_062339008_5	false
1609	interacts with	WP_066371470_4 (interacts with) WP_066371470_1	false
1611	interacts with	WP_066371470_4 (interacts with) WP_066371470_5	false
1613	interacts with	WP_066371470_4 (interacts with) WP_062346719_2	false
1614	interacts with	WP_066371470_4 (interacts with) WP_066371470_7	false
1615	interacts with	WP_066371470_4 (interacts with) WP_155358788_1	false
1616	interacts with	TAE59458_3 (interacts with) WP_096559014_1	false
1617	interacts with	TAE59458_3 (interacts with) WP_096536886_5	false
1618	interacts with	TAE59458_3 (interacts with) CEJ45116_2	false
1619	interacts with	TAE59458_3 (interacts with) WP_038089561_4	false
1621	interacts with	WP_068385845_6 (interacts with) WP_099068319_4	false
1622	interacts with	WP_068385845_6 (interacts with) WP_012595952_5	false
1623	interacts with	WP_068385845_6 (interacts with) WP_044449859_1	false
1624	interacts with	WP_068385845_6 (interacts with) WP_124970176_14	false
1625	interacts with	WP_068385845_6 (interacts with) WP_096537472_3	false
1626	interacts with	WP_068385845_6 (interacts with) WP_096689510_2	false
1628	interacts with	WP_073591536_4 (interacts with) WP_012595952_5	false
1629	interacts with	WP_073591536_4 (interacts with) TRT88208_1	false
1630	interacts with	WP_073591536_4 (interacts with) WP_015216084_5	false
1631	interacts with	WP_073591536_4 (interacts with) WP_015216084_10	false
1632	interacts with	WP_155358788_2 (interacts with) WP_062346719_1	false
1633	interacts with	WP_155358788_2 (interacts with) WP_066371470_3	false
1634	interacts with	WP_155358788_2 (interacts with) WP_155349848_3	false
1635	interacts with	WP_155358788_2 (interacts with) WP_155358788_3	false
1636	interacts with	WP_155358788_2 (interacts with) WP_062339008_5	false
1637	interacts with	WP_155358788_2 (interacts with) WP_062339008_2	false
1639	interacts with	WP_155358788_2 (interacts with) WP_017581465_1	false
1640	interacts with	WP_155358788_2 (interacts with) WP_066371470_7	false
1641	interacts with	WP_155358788_2 (interacts with) WP_136238412_3	false
1643	interacts with	WP_155358788_2 (interacts with) WP_062346719_3	false
1644	interacts with	WP_155358788_2 (interacts with) WP_155358788_1	false
1645	interacts with	WP_096559014_4 (interacts with) WP_096559014_1	false
1646	interacts with	WP_096559014_4 (interacts with) WP_096536886_5	false
1647	interacts with	WP_096559014_4 (interacts with) CEJ45116_2	false
1648	interacts with	WP_096559014_4 (interacts with) CEJ45116_5	false
1649	interacts with	WP_096559014_4 (interacts with) TAE59458_3	false
1650	interacts with	WP_053706403_2 (interacts with) WP_051708270_1	false
1651	interacts with	WP_053706403_2 (interacts with) ANS68054_1	false
1652	interacts with	WP_053706403_2 (interacts with) WP_079191916_2	false
1653	interacts with	WP_053706403_2 (interacts with) ALC22075_5	false
1654	interacts with	WP_053706403_2 (interacts with) WP_157846946_2	false
1655	interacts with	WP_053706403_2 (interacts with) WP_109595189_2	false
1656	interacts with	WP_053706403_2 (interacts with) WP_130878496_1	false
1657	interacts with	WP_053706403_2 (interacts with) WP_130878496_2	false
1658	interacts with	WP_053706403_2 (interacts with) WP_079189213_2	false
1659	interacts with	WP_053706403_2 (interacts with) WP_104258544_2	false
1660	interacts with	WP_099700413_4 (interacts with) WP_099068319_4	false
1661	interacts with	WP_099700413_4 (interacts with) WP_070396036_1	false
1662	interacts with	WP_099700413_4 (interacts with) WP_015216084_5	false
1663	interacts with	WP_099700413_4 (interacts with) WP_053455886_1	false
1664	interacts with	WP_099700413_4 (interacts with) BBD63560_4	false
1665	interacts with	WP_099700413_4 (interacts with) WP_096589596_10	false
1666	interacts with	WP_099700413_4 (interacts with) WP_096537472_3	false
1667	interacts with	WP_099700413_4 (interacts with) WP_070396036_3	false
1668	interacts with	WP_099700413_4 (interacts with) WP_086760950_11	false
1669	interacts with	WP_099700413_4 (interacts with) WP_096559014_4	false
1670	interacts with	WP_099700413_4 (interacts with) WP_124970176_14	false
1671	interacts with	WP_099700413_4 (interacts with) WP_017748579_3	false
1672	interacts with	WP_099700413_4 (interacts with) RCJ30949_2	false
1673	interacts with	WP_099700413_4 (interacts with) WP_099700413_2	false
1674	interacts with	WP_099700413_4 (interacts with) WP_017314970_2	false
1675	interacts with	WP_099700413_4 (interacts with) WP_106240815_3	false
1676	interacts with	WP_099700413_4 (interacts with) WP_068385845_3	false
1677	interacts with	WP_099700413_4 (interacts with) WP_096689510_6	false
1679	interacts with	WP_015078657_2 (interacts with) WP_162399505_1	false
1680	interacts with	WP_015078657_2 (interacts with) WP_096559014_1	false
1681	interacts with	WP_015078657_2 (interacts with) WP_066383651_5	false
1683	interacts with	WP_015078657_2 (interacts with) WP_012409362_4	false
1684	interacts with	WP_015078657_2 (interacts with) WP_103136595_2	false
1685	interacts with	WP_015078657_2 (interacts with) TVP62740_2	false
1686	interacts with	WP_015078657_2 (interacts with) WP_069073064_4	false
1687	interacts with	WP_015078657_2 (interacts with) WP_096536886_5	false
1688	interacts with	WP_015078657_2 (interacts with) WP_015212417_1	false
1689	interacts with	WP_015078657_2 (interacts with) WP_006195640_4	false
1690	interacts with	WP_015078657_2 (interacts with) WP_099071810_2	false
1691	interacts with	WP_015078657_2 (interacts with) WP_015113151_1	false
1692	interacts with	WP_015078657_2 (interacts with) WP_096559014_5	false
1694	interacts with	WP_015078657_2 (interacts with) WP_026100063_4	false
1695	interacts with	WP_015078657_2 (interacts with) WP_009343975_2	false
1696	interacts with	WP_015078657_2 (interacts with) WP_089091039_1	false
1697	interacts with	WP_015078657_2 (interacts with) BAZ29283_1	false
1698	interacts with	WP_015078657_2 (interacts with) WP_096730381_2	false
1699	interacts with	WP_015078657_2 (interacts with) WP_162399505_5	false
1700	interacts with	WP_015078657_2 (interacts with) WP_073639381_1	false
1701	interacts with	WP_015078657_2 (interacts with) WP_015113151_4	false
1702	interacts with	WP_015078657_2 (interacts with) WP_057178590_1	false
1703	interacts with	WP_015078657_2 (interacts with) WP_096575011_4	false
1704	interacts with	WP_015078657_2 (interacts with) WP_138499068_4	false
1705	interacts with	WP_015078657_2 (interacts with) WP_073644071_1	false
1706	interacts with	WP_015078657_2 (interacts with) BAZ42602_5	false
1707	interacts with	WP_015078657_2 (interacts with) CEJ45116_2	false
1708	interacts with	WP_015078657_2 (interacts with) WP_062295185_1	false
1709	interacts with	WP_015078657_2 (interacts with) WP_087539234_4	false
1710	interacts with	WP_015078657_2 (interacts with) WP_015210601_6	false
1711	interacts with	WP_015078657_2 (interacts with) WP_015212417_3	false
1712	interacts with	WP_015078657_2 (interacts with) WP_038089561_4	false
1713	interacts with	WP_015078657_2 (interacts with) TAE59458_1	false
1714	interacts with	WP_015078657_2 (interacts with) WP_099071810_1	false
1715	interacts with	WP_015078657_2 (interacts with) WP_009343975_1	false
1716	interacts with	WP_015078657_2 (interacts with) TAE59458_3	false
1717	interacts with	WP_015078657_2 (interacts with) WP_087539234_7	false
1718	interacts with	WP_015078657_2 (interacts with) WP_016950446_1	false
1719	interacts with	WP_015078657_2 (interacts with) WP_096559014_4	false
1720	interacts with	WP_015078657_2 (interacts with) WP_016950446_3	false
1721	interacts with	WP_015078657_2 (interacts with) WP_013190203_1	false
1722	interacts with	WP_015078657_2 (interacts with) WP_096575011_6	false
1723	interacts with	WP_015078657_2 (interacts with) OBQ18754_2	false
1724	interacts with	WP_015078657_2 (interacts with) WP_015212417_2	false
1725	interacts with	WP_015078657_2 (interacts with) WP_011321056_1	false
1726	interacts with	WP_015078657_2 (interacts with) WP_069073064_6	false
1727	interacts with	WP_015078657_2 (interacts with) RCJ30949_2	false
1728	interacts with	WP_015078657_2 (interacts with) WP_096664869_2	false
1729	interacts with	WP_015078657_2 (interacts with) WP_071189061_3	false
1730	interacts with	WP_015078657_2 (interacts with) WP_089091039_4	false
1731	interacts with	WP_015078657_2 (interacts with) WP_168496018_3	false
1732	interacts with	WP_015078657_2 (interacts with) WP_069073064_1	false
1733	interacts with	WP_015078657_2 (interacts with) CEJ45116_1	false
1734	interacts with	WP_015078657_2 (interacts with) WP_012409362_6	false
1735	interacts with	WP_015078657_2 (interacts with) WP_062295185_6	false
1737	interacts with	WP_015078657_2 (interacts with) WP_015127932_1	false
1738	interacts with	WP_015078657_2 (interacts with) TVP62740_1	false
1739	interacts with	WP_015078657_2 (interacts with) BAZ29283_4	false
1740	interacts with	WP_015078657_2 (interacts with) WP_096536886_1	false
1741	interacts with	WP_015078657_2 (interacts with) WP_096536886_4	false
1742	interacts with	WP_015078657_2 (interacts with) WP_168496018_1	false
1743	interacts with	WP_015078657_2 (interacts with) WP_096575011_3	false
1744	interacts with	WP_015078657_2 (interacts with) RCJ30949_6	false
1745	interacts with	WP_015078657_2 (interacts with) WP_099068319_6	false
1746	interacts with	WP_015078657_2 (interacts with) RCJ30949_4	false
1747	interacts with	WP_015078657_2 (interacts with) WP_138499068_1	false
1748	interacts with	WP_015078657_2 (interacts with) WP_137906310_1	false
1749	interacts with	WP_015078657_2 (interacts with) WP_104387267_1	false
1751	interacts with	WP_015078657_2 (interacts with) WP_012409362_2	false
1752	interacts with	WP_015078657_2 (interacts with) WP_168645325_1	false
1754	interacts with	WP_015078657_2 (interacts with) WP_114082527_2	false
1755	interacts with	WP_015078657_2 (interacts with) WP_096681247_5	false
1757	interacts with	WP_015078657_2 (interacts with) WP_011321056_2	false
1758	interacts with	WP_015078657_2 (interacts with) WP_069073064_5	false
1759	interacts with	WP_015078657_2 (interacts with) WP_096559014_6	false
1760	interacts with	WP_015078657_2 (interacts with) RCJ14929_3	false
1761	interacts with	WP_015078657_2 (interacts with) RCJ14929_1	false
1763	interacts with	WP_015078657_2 (interacts with) WP_015127932_2	false
1764	interacts with	WP_015078657_2 (interacts with) WP_089091039_2	false
1765	interacts with	WP_015078657_2 (interacts with) WP_138499068_5	false
1766	interacts with	WP_015078657_2 (interacts with) WP_011321056_5	false
1768	interacts with	WP_015078657_2 (interacts with) WP_012409362_7	false
1769	interacts with	WP_015078657_2 (interacts with) BAZ29283_3	false
1770	interacts with	WP_015078657_2 (interacts with) WP_066383651_6	false
1771	interacts with	WP_015078657_2 (interacts with) WP_073644071_4	false
1772	interacts with	WP_015078657_2 (interacts with) OBQ36138_1	false
1773	interacts with	WP_015078657_2 (interacts with) WP_096569967_3	false
1774	interacts with	WP_015078657_2 (interacts with) WP_006195640_9	false
1775	interacts with	WP_015078657_2 (interacts with) WP_087539234_3	false
1776	interacts with	WP_015078657_2 (interacts with) WP_096569967_5	false
1777	interacts with	WP_015078657_2 (interacts with) WP_006195640_5	false
1778	interacts with	WP_015078657_2 (interacts with) WP_168357543_1	false
1779	interacts with	WP_015078657_2 (interacts with) WP_006195640_8	false
1780	interacts with	WP_015078657_2 (interacts with) WP_096569967_4	false
1781	interacts with	WP_015078657_2 (interacts with) WP_012409362_8	false
1782	interacts with	WP_015078657_2 (interacts with) WP_044449859_1	false
1783	interacts with	WP_015078657_2 (interacts with) WP_062295185_4	false
1784	interacts with	WP_015078657_2 (interacts with) WP_006195640_2	false
1785	interacts with	WP_015078657_2 (interacts with) WP_015127932_4	false
1786	interacts with	WP_015078657_2 (interacts with) WP_168465654_1	false
1787	interacts with	WP_015078657_2 (interacts with) WP_019496925_1	false
1788	interacts with	WP_015078657_2 (interacts with) WP_073644071_5	false
1789	interacts with	WP_015078657_2 (interacts with) WP_096559014_8	false
1790	interacts with	WP_015078657_2 (interacts with) WP_071189061_2	false
1792	interacts with	WP_015078657_2 (interacts with) WP_096681247_6	false
1793	interacts with	WP_015078657_2 (interacts with) WP_012409362_5	false
1794	interacts with	WP_015078657_2 (interacts with) WP_027402982_2	false
1795	interacts with	WP_015078657_2 (interacts with) WP_006195640_7	false
1796	interacts with	WP_015078657_2 (interacts with) WP_066383651_2	false
1797	interacts with	WP_015078657_2 (interacts with) WP_089091039_3	false
1798	interacts with	WP_015078657_2 (interacts with) WP_073644071_2	false
1799	interacts with	WP_015078657_2 (interacts with) WP_073644071_8	false
1801	interacts with	WP_015078657_2 (interacts with) WP_114082527_5	false
1802	interacts with	WP_015078657_2 (interacts with) WP_096730381_1	false
1803	interacts with	WP_015078657_2 (interacts with) WP_015210601_2	false
1804	interacts with	WP_015078657_2 (interacts with) WP_026100063_6	false
1805	interacts with	WP_015078657_2 (interacts with) RCJ30949_5	false
1806	interacts with	WP_015078657_2 (interacts with) WP_099071810_6	false
1807	interacts with	WP_015078657_2 (interacts with) WP_066383651_4	false
1808	interacts with	WP_057178590_8 (interacts with) WP_015078657_10	false
1809	interacts with	WP_057178590_8 (interacts with) WP_162399505_5	false
1810	interacts with	WP_057178590_8 (interacts with) RCJ30949_9	false
1811	interacts with	WP_057178590_8 (interacts with) WP_148763415_5	false
1813	interacts with	WP_057178590_8 (interacts with) WP_015127932_7	false
1814	interacts with	WP_057178590_8 (interacts with) WP_015210601_6	false
1816	interacts with	WP_057178590_8 (interacts with) TAE59458_6	false
1817	interacts with	WP_057178590_8 (interacts with) WP_038089561_4	false
1818	interacts with	WP_057178590_8 (interacts with) OBQ18754_3	false
1819	interacts with	WP_057178590_8 (interacts with) WP_167725682_4	false
1822	interacts with	WP_051840194_2 (interacts with) WP_018960901_1	false
1823	interacts with	WP_051840194_2 (interacts with) WP_153461219_4	false
1825	interacts with	WP_051840194_2 (interacts with) WP_009079852_1	false
1827	interacts with	WP_051840194_2 (interacts with) WP_141310912_1	false
1829	interacts with	WP_051840194_2 (interacts with) WP_058047489_1	false
1830	interacts with	WP_051840194_2 (interacts with) WP_071383933_2	false
1832	interacts with	WP_051840194_2 (interacts with) WP_051418997_1	false
1834	interacts with	WP_051840194_2 (interacts with) WP_097866484_1	false
1836	interacts with	WP_051840194_2 (interacts with) WP_093908736_1	false
1838	interacts with	WP_051840194_2 (interacts with) WP_159770677_1	false
1840	interacts with	WP_051840194_2 (interacts with) WP_126393842_1	false
1842	interacts with	WP_051840194_2 (interacts with) WP_120754718_1	false
1844	interacts with	WP_051840194_2 (interacts with) WP_051840194_1	false
1846	interacts with	WP_051840194_2 (interacts with) WP_106331017_2	false
1848	interacts with	WP_051840194_2 (interacts with) WP_143043955_1	false
1851	interacts with	WP_062295185_3 (interacts with) WP_127086205_5	false
1852	interacts with	WP_062295185_3 (interacts with) WP_162399505_1	false
1853	interacts with	WP_062295185_3 (interacts with) WP_096559014_1	false
1854	interacts with	WP_062295185_3 (interacts with) WP_066383651_5	false
1855	interacts with	WP_062295185_3 (interacts with) WP_103136595_2	false
1856	interacts with	WP_062295185_3 (interacts with) TVP62740_2	false
1857	interacts with	WP_062295185_3 (interacts with) WP_069073064_4	false
1858	interacts with	WP_062295185_3 (interacts with) WP_096536886_5	false
1859	interacts with	WP_062295185_3 (interacts with) WP_015212417_1	false
1860	interacts with	WP_062295185_3 (interacts with) WP_006195640_4	false
1861	interacts with	WP_062295185_3 (interacts with) WP_099071810_2	false
1862	interacts with	WP_062295185_3 (interacts with) WP_015113151_1	false
1863	interacts with	WP_062295185_3 (interacts with) WP_096559014_5	false
1864	interacts with	WP_062295185_3 (interacts with) WP_026100063_4	false
1865	interacts with	WP_062295185_3 (interacts with) WP_009343975_2	false
1866	interacts with	WP_062295185_3 (interacts with) BAZ29283_1	false
1867	interacts with	WP_062295185_3 (interacts with) WP_089091039_1	false
1868	interacts with	WP_062295185_3 (interacts with) WP_073639381_1	false
1869	interacts with	WP_062295185_3 (interacts with) WP_015113151_4	false
1870	interacts with	WP_062295185_3 (interacts with) WP_057178590_1	false
1871	interacts with	WP_062295185_3 (interacts with) WP_096575011_4	false
1872	interacts with	WP_062295185_3 (interacts with) WP_073644071_1	false
1873	interacts with	WP_062295185_3 (interacts with) CEJ45116_2	false
1874	interacts with	WP_062295185_3 (interacts with) WP_062295185_1	false
1875	interacts with	WP_062295185_3 (interacts with) WP_087539234_4	false
1876	interacts with	WP_062295185_3 (interacts with) WP_015212417_3	false
1877	interacts with	WP_062295185_3 (interacts with) TAE59458_1	false
1878	interacts with	WP_062295185_3 (interacts with) WP_099071810_1	false
1879	interacts with	WP_062295185_3 (interacts with) TAE59458_3	false
1880	interacts with	WP_062295185_3 (interacts with) WP_009343975_1	false
1881	interacts with	WP_062295185_3 (interacts with) WP_016950446_1	false
1882	interacts with	WP_062295185_3 (interacts with) WP_096559014_4	false
1883	interacts with	WP_062295185_3 (interacts with) WP_015078657_2	false
1884	interacts with	WP_062295185_3 (interacts with) WP_013190203_1	false
1885	interacts with	WP_062295185_3 (interacts with) WP_016950446_3	false
1886	interacts with	WP_062295185_3 (interacts with) OBQ18754_2	false
1887	interacts with	WP_062295185_3 (interacts with) WP_096575011_6	false
1888	interacts with	WP_062295185_3 (interacts with) WP_015212417_2	false
1889	interacts with	WP_062295185_3 (interacts with) WP_011321056_1	false
1890	interacts with	WP_062295185_3 (interacts with) WP_069073064_6	false
1891	interacts with	WP_062295185_3 (interacts with) WP_096664869_2	false
1892	interacts with	WP_062295185_3 (interacts with) WP_071189061_3	false
1893	interacts with	WP_062295185_3 (interacts with) RCJ30949_2	false
1894	interacts with	WP_062295185_3 (interacts with) WP_089091039_4	false
1895	interacts with	WP_062295185_3 (interacts with) WP_069073064_1	false
1896	interacts with	WP_062295185_3 (interacts with) OBQ01900_3	false
1897	interacts with	WP_062295185_3 (interacts with) CEJ45116_1	false
1898	interacts with	WP_062295185_3 (interacts with) WP_062295185_6	false
1899	interacts with	WP_062295185_3 (interacts with) WP_068385845_3	false
1900	interacts with	WP_062295185_3 (interacts with) BAZ29283_4	false
1901	interacts with	WP_062295185_3 (interacts with) TVP62740_1	false
1902	interacts with	WP_062295185_3 (interacts with) WP_096536886_1	false
1903	interacts with	WP_062295185_3 (interacts with) WP_096536886_4	false
1904	interacts with	WP_062295185_3 (interacts with) WP_168496018_1	false
1905	interacts with	WP_062295185_3 (interacts with) WP_096575011_3	false
1906	interacts with	WP_062295185_3 (interacts with) RCJ30949_6	false
1907	interacts with	WP_062295185_3 (interacts with) WP_099068319_6	false
1908	interacts with	WP_062295185_3 (interacts with) RCJ30949_4	false
1909	interacts with	WP_062295185_3 (interacts with) WP_087539234_1	false
1910	interacts with	WP_062295185_3 (interacts with) WP_137906310_1	false
1911	interacts with	WP_062295185_3 (interacts with) WP_104387267_1	false
1912	interacts with	WP_062295185_3 (interacts with) WP_168645325_1	false
1913	interacts with	WP_062295185_3 (interacts with) WP_011321056_2	false
1914	interacts with	WP_062295185_3 (interacts with) WP_069073064_5	false
1915	interacts with	WP_062295185_3 (interacts with) WP_096559014_6	false
1916	interacts with	WP_062295185_3 (interacts with) RCJ14929_3	false
1917	interacts with	WP_062295185_3 (interacts with) RCJ14929_1	false
1918	interacts with	WP_062295185_3 (interacts with) WP_089091039_2	false
1919	interacts with	WP_062295185_3 (interacts with) WP_011321056_5	false
1920	interacts with	WP_062295185_3 (interacts with) BAZ29283_3	false
1921	interacts with	WP_062295185_3 (interacts with) WP_073644071_4	false
1922	interacts with	WP_062295185_3 (interacts with) OBQ36138_1	false
1923	interacts with	WP_062295185_3 (interacts with) WP_162399505_4	false
1924	interacts with	WP_062295185_3 (interacts with) WP_096569967_3	false
1925	interacts with	WP_062295185_3 (interacts with) WP_006195640_9	false
1926	interacts with	WP_062295185_3 (interacts with) WP_087539234_3	false
1927	interacts with	WP_062295185_3 (interacts with) WP_087592205_6	false
1928	interacts with	WP_062295185_3 (interacts with) WP_096569967_5	false
1929	interacts with	WP_062295185_3 (interacts with) WP_006195640_5	false
1930	interacts with	WP_062295185_3 (interacts with) WP_168357543_1	false
1931	interacts with	WP_062295185_3 (interacts with) TVP62740_6	false
1932	interacts with	WP_062295185_3 (interacts with) WP_006195640_8	false
1933	interacts with	WP_062295185_3 (interacts with) WP_096569967_4	false
1934	interacts with	WP_062295185_3 (interacts with) WP_044449859_1	false
1935	interacts with	WP_062295185_3 (interacts with) WP_062295185_4	false
1936	interacts with	WP_062295185_3 (interacts with) WP_006195640_2	false
1937	interacts with	WP_062295185_3 (interacts with) WP_168465654_1	false
1938	interacts with	WP_062295185_3 (interacts with) WP_073644071_5	false
1939	interacts with	WP_062295185_3 (interacts with) WP_071189061_2	false
1940	interacts with	WP_062295185_3 (interacts with) WP_096559014_8	false
1941	interacts with	WP_062295185_3 (interacts with) WP_027402982_2	false
1942	interacts with	WP_062295185_3 (interacts with) WP_006195640_7	false
1943	interacts with	WP_062295185_3 (interacts with) WP_066383651_2	false
1944	interacts with	WP_062295185_3 (interacts with) WP_089091039_3	false
1945	interacts with	WP_062295185_3 (interacts with) WP_073644071_8	false
1946	interacts with	WP_062295185_3 (interacts with) WP_073644071_2	false
1947	interacts with	WP_062295185_3 (interacts with) WP_015210601_2	false
1948	interacts with	WP_062295185_3 (interacts with) WP_096575011_2	false
1949	interacts with	WP_062295185_3 (interacts with) RCJ30949_5	false
1950	interacts with	WP_062295185_3 (interacts with) WP_099071810_6	false
1952	interacts with	RCJ40334_3 (interacts with) WP_124155194_2	false
1954	interacts with	RCJ40334_3 (interacts with) WP_167721203_8	false
1955	interacts with	RCJ40334_3 (interacts with) WP_015216084_5	false
1956	interacts with	RCJ40334_3 (interacts with) BAZ42602_1	false
1957	interacts with	RCJ40334_3 (interacts with) WP_169219633_3	false
1958	interacts with	RCJ40334_3 (interacts with) WP_019495762_1	false
1959	interacts with	RCJ40334_3 (interacts with) WP_171977306_3	false
1960	interacts with	RCJ40334_3 (interacts with) BAZ42602_5	false
1961	interacts with	RCJ40334_3 (interacts with) RCJ19623_1	false
1962	interacts with	RCJ40334_3 (interacts with) WP_086760950_12	false
1964	interacts with	RCJ40334_3 (interacts with) WP_162398402_1	false
1965	interacts with	RCJ40334_3 (interacts with) WP_168643398_4	false
1966	interacts with	RCJ40334_3 (interacts with) WP_096569967_4	false
1968	interacts with	RCJ40334_3 (interacts with) WP_155746097_1	false
1969	interacts with	RCJ40334_3 (interacts with) WP_124970176_14	false
1970	interacts with	RCJ40334_3 (interacts with) WP_138499827_1	false
1972	interacts with	RCJ40334_3 (interacts with) WP_012409787_4	false
1973	interacts with	RCJ40334_3 (interacts with) WP_002735885_4	false
1974	interacts with	RCJ40334_3 (interacts with) TRT88208_1	false
1975	interacts with	RCJ40334_3 (interacts with) WP_138499827_5	false
1976	interacts with	RCJ40334_3 (interacts with) WP_012409787_3	false
1977	interacts with	RCJ40334_3 (interacts with) WP_106289349_3	false
1978	interacts with	RCJ40334_3 (interacts with) WP_096689510_6	false
1979	interacts with	RCJ40334_3 (interacts with) WP_127078868_1	false
1980	interacts with	RCJ40334_3 (interacts with) WP_106289349_2	false
1981	interacts with	RCJ40334_3 (interacts with) WP_096688632_1	false
1982	interacts with	WP_017198207_2 (interacts with) WP_052680420_4	false
1983	interacts with	WP_017198207_2 (interacts with) WP_052808529_1	false
1984	interacts with	WP_017198207_2 (interacts with) WP_051837683_5	false
1985	interacts with	WP_017198207_2 (interacts with) WP_052680420_3	false
1986	interacts with	WP_017198207_2 (interacts with) WP_051700182_4	false
1987	interacts with	WP_017198207_2 (interacts with) AWS47415_3	false
1989	interacts with	WP_017198207_2 (interacts with) WP_017198207_5	false
1990	interacts with	WP_017198207_2 (interacts with) WP_164394909_1	false
1991	interacts with	WP_017198207_2 (interacts with) WP_138689268_3	false
1992	interacts with	WP_017198207_2 (interacts with) PZN41733_3	false
1993	interacts with	WP_017198207_2 (interacts with) SNT25203_1	false
1994	interacts with	WP_017198207_2 (interacts with) WP_051700182_2	false
1995	interacts with	WP_017198207_2 (interacts with) WP_049976882_1	false
1996	interacts with	WP_017198207_2 (interacts with) WP_170198719_2	false
1997	interacts with	WP_017198207_2 (interacts with) WP_138666048_2	false
1999	interacts with	WP_017198207_2 (interacts with) WP_159425899_3	false
2000	interacts with	WP_017198207_2 (interacts with) WP_051837683_4	false
2001	interacts with	WP_017198207_2 (interacts with) WP_017198207_3	false
2002	interacts with	WP_017198207_2 (interacts with) WP_051837683_3	false
2003	interacts with	WP_017198207_2 (interacts with) WP_091097544_2	false
2004	interacts with	WP_017198207_2 (interacts with) WP_016570561_1	false
2005	interacts with	WP_017198207_2 (interacts with) WP_127931424_2	false
2006	interacts with	WP_017198207_2 (interacts with) WP_107777750_1	false
2007	interacts with	WP_017198207_2 (interacts with) WP_030169499_4	false
2008	interacts with	WP_019501955_12 (interacts with) WP_124970176_14	false
2009	interacts with	WP_019501955_12 (interacts with) WP_086769105_3	false
2010	interacts with	WP_019501955_12 (interacts with) AVH79607_2	false
2012	interacts with	WP_019501955_12 (interacts with) WP_019499235_2	false
2013	interacts with	WP_019501955_12 (interacts with) WP_096537472_3	false
2014	interacts with	WP_019501955_12 (interacts with) WP_087592205_6	false
2016	interacts with	WP_019501955_12 (interacts with) WP_019501955_6	false
2017	interacts with	WP_106240815_2 (interacts with) WP_099068319_4	false
2018	interacts with	WP_106240815_2 (interacts with) WP_070396036_1	false
2019	interacts with	WP_106240815_2 (interacts with) WP_053455886_1	false
2020	interacts with	WP_106240815_2 (interacts with) BBD63560_4	false
2021	interacts with	WP_106240815_2 (interacts with) WP_087542717_3	false
2022	interacts with	WP_106240815_2 (interacts with) WP_096537472_3	false
2023	interacts with	WP_106240815_2 (interacts with) CEJ45116_2	false
2024	interacts with	WP_106240815_2 (interacts with) WP_096569967_5	false
2025	interacts with	WP_106240815_2 (interacts with) WP_099700413_4	false
2026	interacts with	WP_106240815_2 (interacts with) WP_099700413_2	false
2027	interacts with	WP_106240815_2 (interacts with) WP_086769105_3	false
2028	interacts with	WP_106240815_2 (interacts with) WP_017314970_2	false
2029	interacts with	WP_106240815_2 (interacts with) WP_106240815_3	false
2030	interacts with	WP_106240815_2 (interacts with) WP_068385845_3	false
2031	interacts with	WP_106240815_2 (interacts with) WP_096689510_6	false
2032	interacts with	WP_106240815_2 (interacts with) TVP62740_1	false
2033	interacts with	WP_106240815_2 (interacts with) WP_027843178_3	false
2035	interacts with	WP_106240815_2 (interacts with) WP_015207767_5	false
2037	interacts with	WP_096579222_1 (interacts with) WP_088242795_2	false
2038	interacts with	WP_096579222_1 (interacts with) WP_096575011_2	false
2039	interacts with	WP_096579222_1 (interacts with) WP_015113151_1	false
2040	interacts with	WP_096579222_1 (interacts with) WP_069073064_6	false
2041	interacts with	WP_096579222_1 (interacts with) WP_096559014_1	false
2042	interacts with	WP_096579222_1 (interacts with) WP_015113151_4	false
2043	interacts with	WP_096579222_1 (interacts with) WP_073639381_1	false
2045	interacts with	WP_096579222_1 (interacts with) WP_015113151_3	false
2046	interacts with	WP_096579222_1 (interacts with) WP_044449859_1	false
2047	interacts with	WP_096575011_6 (interacts with) WP_096559014_1	false
2048	interacts with	WP_096575011_6 (interacts with) WP_096536886_5	false
2049	interacts with	WP_096575011_6 (interacts with) WP_015212417_1	false
2050	interacts with	WP_096575011_6 (interacts with) WP_167725682_2	false
2051	interacts with	WP_096575011_6 (interacts with) WP_073639381_1	false
2052	interacts with	WP_096575011_6 (interacts with) CEJ45116_2	false
2053	interacts with	WP_096575011_6 (interacts with) CEJ45116_5	false
2054	interacts with	WP_096575011_6 (interacts with) WP_099071810_1	false
2055	interacts with	WP_096575011_6 (interacts with) TAE59458_3	false
2056	interacts with	WP_096575011_6 (interacts with) WP_016950446_1	false
2057	interacts with	WP_096575011_6 (interacts with) WP_096559014_4	false
2058	interacts with	WP_096575011_6 (interacts with) WP_013190203_1	false
2059	interacts with	WP_096575011_6 (interacts with) OBQ18754_2	false
2060	interacts with	WP_096575011_6 (interacts with) WP_015212417_2	false
2061	interacts with	WP_096575011_6 (interacts with) WP_069073064_6	false
2062	interacts with	WP_096575011_6 (interacts with) RCJ30949_2	false
2063	interacts with	WP_096575011_6 (interacts with) WP_069073064_1	false
2064	interacts with	WP_096575011_6 (interacts with) TVP62740_1	false
2065	interacts with	WP_096575011_6 (interacts with) RCJ30949_4	false
2066	interacts with	WP_096575011_6 (interacts with) WP_087539234_1	false
2067	interacts with	WP_096575011_6 (interacts with) RCJ14929_3	false
2068	interacts with	WP_096575011_6 (interacts with) WP_089091039_2	false
2069	interacts with	WP_096575011_6 (interacts with) BAZ29283_3	false
2070	interacts with	WP_096575011_6 (interacts with) WP_096569967_5	false
2071	interacts with	WP_096575011_6 (interacts with) WP_044449859_1	false
2072	interacts with	WP_096575011_6 (interacts with) WP_073644071_5	false
2073	interacts with	WP_096575011_6 (interacts with) WP_044449859_3	false
2074	interacts with	WP_096575011_6 (interacts with) WP_006195640_7	false
2075	interacts with	WP_096575011_6 (interacts with) WP_015155263_3	false
2076	interacts with	WP_096575011_6 (interacts with) WP_096575011_2	false
2077	interacts with	WP_096575011_6 (interacts with) WP_099071810_6	false
2078	interacts with	OBQ18754_2 (interacts with) WP_096559014_1	false
2079	interacts with	OBQ18754_2 (interacts with) WP_096536886_5	false
2080	interacts with	OBQ18754_2 (interacts with) CEJ45116_2	false
2081	interacts with	OBQ18754_2 (interacts with) WP_038089561_4	false
2082	interacts with	OBQ18754_2 (interacts with) TAE59458_3	false
2083	interacts with	OBQ18754_2 (interacts with) WP_096559014_4	false
2085	interacts with	WP_019501955_4 (interacts with) WP_168643398_4	false
2086	interacts with	WP_019501955_4 (interacts with) WP_096688632_5	false
2087	interacts with	WP_019501955_4 (interacts with) WP_011610106_2	false
2088	interacts with	WP_019501955_4 (interacts with) WP_124155194_2	false
2089	interacts with	WP_019501955_4 (interacts with) WP_138498533_4	false
2090	interacts with	WP_019501955_4 (interacts with) WP_124970176_6	false
2091	interacts with	WP_019501955_4 (interacts with) WP_012597836_7	false
2092	interacts with	WP_019501955_4 (interacts with) WP_103138325_3	false
2093	interacts with	WP_019501955_4 (interacts with) RCJ40334_3	false
2094	interacts with	WP_019501955_4 (interacts with) WP_124970176_14	false
2095	interacts with	WP_019501955_4 (interacts with) WP_124970176_9	false
2097	interacts with	WP_019501955_4 (interacts with) WP_015216084_8	false
2098	interacts with	WP_019501955_4 (interacts with) WP_006197379_2	false
2100	interacts with	WP_019501955_4 (interacts with) WP_138498533_6	false
2101	interacts with	WP_019501955_4 (interacts with) WP_096689510_2	false
2102	interacts with	WP_019501955_4 (interacts with) AVH79628_3	false
2103	interacts with	WP_019501955_4 (interacts with) WP_002735885_4	false
2105	interacts with	WP_019501955_4 (interacts with) AVH79628_2	false
2106	interacts with	WP_019501955_4 (interacts with) WP_096589596_4	false
2107	interacts with	WP_019501955_4 (interacts with) WP_015216084_7	false
2108	interacts with	WP_019501955_4 (interacts with) TRT88208_1	false
2109	interacts with	WP_019501955_4 (interacts with) WP_019495762_1	false
2110	interacts with	WP_019501955_4 (interacts with) WP_012595952_5	false
2111	interacts with	WP_019501955_4 (interacts with) WP_012409787_3	false
2112	interacts with	WP_019501955_4 (interacts with) OBQ01900_2	false
2113	interacts with	WP_019501955_4 (interacts with) WP_171977306_3	false
2114	interacts with	WP_019501955_4 (interacts with) AVH79456_3	false
2115	interacts with	WP_019501955_4 (interacts with) WP_106289349_3	false
2116	interacts with	WP_019501955_4 (interacts with) WP_138499827_4	false
2117	interacts with	WP_019501955_4 (interacts with) WP_109013279_1	false
2118	interacts with	WP_019501955_4 (interacts with) WP_086835908_1	false
2119	interacts with	WP_019501955_4 (interacts with) WP_138498533_3	false
2120	interacts with	WP_019501955_4 (interacts with) AVH79607_5	false
2121	interacts with	WP_019501955_4 (interacts with) WP_015216084_6	false
2122	interacts with	WP_019501955_4 (interacts with) WP_127078868_1	false
2123	interacts with	WP_019501955_4 (interacts with) WP_087592205_11	false
2124	interacts with	WP_019501955_4 (interacts with) WP_138499827_2	false
2125	interacts with	WP_019501955_4 (interacts with) WP_167721203_2	false
2126	interacts with	WP_019501955_4 (interacts with) WP_104899482_2	false
2127	interacts with	WP_019501955_4 (interacts with) WP_019501955_6	false
2128	interacts with	WP_019501955_4 (interacts with) WP_096688632_1	false
2130	interacts with	WP_163699711_3 (interacts with) WP_163670238_2	false
2131	interacts with	WP_011321056_1 (interacts with) WP_096559014_1	false
2132	interacts with	WP_011321056_1 (interacts with) WP_096536886_5	false
2133	interacts with	WP_011321056_1 (interacts with) WP_015212417_1	false
2135	interacts with	WP_011321056_1 (interacts with) WP_066383651_1	false
2136	interacts with	WP_011321056_1 (interacts with) WP_167725682_2	false
2137	interacts with	WP_011321056_1 (interacts with) WP_015207767_1	false
2138	interacts with	WP_011321056_1 (interacts with) WP_073639381_1	false
2139	interacts with	WP_011321056_1 (interacts with) WP_026100063_2	false
2141	interacts with	WP_011321056_1 (interacts with) WP_011321056_8	false
2142	interacts with	WP_011321056_1 (interacts with) CEJ45116_2	false
2143	interacts with	WP_011321056_1 (interacts with) WP_099071810_1	false
2144	interacts with	WP_011321056_1 (interacts with) TAE59458_3	false
2145	interacts with	WP_011321056_1 (interacts with) WP_016950446_1	false
2146	interacts with	WP_011321056_1 (interacts with) WP_096559014_4	false
2147	interacts with	WP_011321056_1 (interacts with) WP_013190203_1	false
2148	interacts with	WP_011321056_1 (interacts with) OBQ18754_2	false
2149	interacts with	WP_011321056_1 (interacts with) WP_096575011_6	false
2150	interacts with	WP_011321056_1 (interacts with) WP_015212417_2	false
2151	interacts with	WP_011321056_1 (interacts with) WP_069073064_6	false
2152	interacts with	WP_011321056_1 (interacts with) RCJ30949_2	false
2153	interacts with	WP_011321056_1 (interacts with) WP_069073064_1	false
2154	interacts with	WP_011321056_1 (interacts with) WP_012409362_6	false
2156	interacts with	WP_011321056_1 (interacts with) WP_026100063_7	false
2157	interacts with	WP_011321056_1 (interacts with) RCJ30949_4	false
2158	interacts with	WP_011321056_1 (interacts with) WP_096681247_5	false
2159	interacts with	WP_011321056_1 (interacts with) RCJ14929_3	false
2160	interacts with	WP_011321056_1 (interacts with) WP_015127932_2	false
2161	interacts with	WP_011321056_1 (interacts with) WP_089091039_2	false
2162	interacts with	WP_011321056_1 (interacts with) WP_138499068_5	false
2163	interacts with	WP_011321056_1 (interacts with) BAZ29283_3	false
2164	interacts with	WP_011321056_1 (interacts with) WP_096569967_5	false
2165	interacts with	WP_011321056_1 (interacts with) WP_015207763_1	false
2166	interacts with	WP_011321056_1 (interacts with) WP_044449859_1	false
2167	interacts with	WP_011321056_1 (interacts with) WP_073644071_5	false
2168	interacts with	WP_011321056_1 (interacts with) WP_006195640_7	false
2169	interacts with	WP_011321056_1 (interacts with) WP_017314970_2	false
2170	interacts with	WP_011321056_1 (interacts with) WP_099071810_6	false
2171	interacts with	WP_011321056_1 (interacts with) WP_066383651_4	false
2172	interacts with	WP_011321056_1 (interacts with) WP_027843178_3	false
2173	interacts with	WP_053455886_2 (interacts with) WP_035150190_4	false
2174	interacts with	WP_053455886_2 (interacts with) WP_070396036_1	false
2175	interacts with	WP_053455886_2 (interacts with) WP_096728455_2	false
2176	interacts with	WP_053455886_2 (interacts with) WP_124155194_2	false
2177	interacts with	WP_053455886_2 (interacts with) WP_053455886_3	false
2179	interacts with	WP_053455886_2 (interacts with) WP_096576757_1	false
2180	interacts with	WP_053455886_2 (interacts with) WP_103136595_2	false
2181	interacts with	WP_053455886_2 (interacts with) WP_099068319_2	false
2183	interacts with	WP_053455886_2 (interacts with) WP_096576751_1	false
2184	interacts with	WP_053455886_2 (interacts with) BAY08128_2	false
2185	interacts with	WP_053455886_2 (interacts with) RCJ40850_1	false
2187	interacts with	WP_053455886_2 (interacts with) WP_015193424_5	false
2189	interacts with	WP_053455886_2 (interacts with) WP_105222244_2	false
2190	interacts with	WP_053455886_2 (interacts with) WP_169219633_3	false
2192	interacts with	WP_053455886_2 (interacts with) WP_015193424_3	false
2193	interacts with	WP_053455886_2 (interacts with) BBD63560_4	false
2194	interacts with	WP_053455886_2 (interacts with) WP_053455886_1	false
2195	interacts with	WP_053455886_2 (interacts with) WP_087542717_3	false
2196	interacts with	WP_053455886_2 (interacts with) WP_068385845_2	false
2197	interacts with	WP_053455886_2 (interacts with) WP_096580419_1	false
2198	interacts with	WP_053455886_2 (interacts with) BAY08128_1	false
2199	interacts with	WP_053455886_2 (interacts with) WP_096537472_3	false
2200	interacts with	WP_053455886_2 (interacts with) BBD63560_3	false
2201	interacts with	WP_053455886_2 (interacts with) WP_086769105_4	false
2202	interacts with	WP_053455886_2 (interacts with) TAG67909_1	false
2203	interacts with	WP_053455886_2 (interacts with) WP_099068319_5	false
2204	interacts with	WP_053455886_2 (interacts with) WP_009343975_1	false
2206	interacts with	WP_053455886_2 (interacts with) WP_087542717_4	false
2208	interacts with	WP_053455886_2 (interacts with) WP_068385845_5	false
2209	interacts with	WP_053455886_2 (interacts with) WP_087542717_2	false
2211	interacts with	WP_053455886_2 (interacts with) WP_015193424_4	false
2212	interacts with	WP_053455886_2 (interacts with) WP_099700413_4	false
2214	interacts with	WP_053455886_2 (interacts with) WP_015189896_1	false
2215	interacts with	WP_053455886_2 (interacts with) WP_106240815_2	false
2216	interacts with	WP_053455886_2 (interacts with) WP_124970176_9	false
2217	interacts with	WP_053455886_2 (interacts with) WP_017748579_3	false
2218	interacts with	WP_053455886_2 (interacts with) WP_096537472_5	false
2219	interacts with	WP_053455886_2 (interacts with) WP_096689510_2	false
2220	interacts with	WP_053455886_2 (interacts with) WP_017314970_3	false
2221	interacts with	WP_053455886_2 (interacts with) WP_069073064_6	false
2222	interacts with	WP_053455886_2 (interacts with) WP_099700413_2	false
2224	interacts with	WP_053455886_2 (interacts with) WP_015189896_2	false
2225	interacts with	WP_053455886_2 (interacts with) OBQ01900_2	false
2226	interacts with	WP_053455886_2 (interacts with) WP_086769105_3	false
2228	interacts with	WP_053455886_2 (interacts with) BAZ33272_4	false
2229	interacts with	WP_053455886_2 (interacts with) WP_071107270_2	false
2230	interacts with	WP_053455886_2 (interacts with) WP_017314970_4	false
2231	interacts with	WP_053455886_2 (interacts with) OBQ01900_3	false
2232	interacts with	WP_053455886_2 (interacts with) WP_017314970_2	false
2233	interacts with	WP_053455886_2 (interacts with) WP_106240815_3	false
2234	interacts with	WP_053455886_2 (interacts with) WP_068385845_3	false
2235	interacts with	WP_053455886_2 (interacts with) WP_017314970_1	false
2236	interacts with	WP_053455886_2 (interacts with) WP_087592205_11	false
2238	interacts with	WP_053455886_2 (interacts with) WP_035150190_1	false
2240	interacts with	WP_053455886_2 (interacts with) WP_096689510_4	false
2241	interacts with	WP_053455886_2 (interacts with) BBD63560_1	false
2242	interacts with	WP_027843178_1 (interacts with) WP_099068319_4	false
2243	interacts with	WP_027843178_1 (interacts with) WP_027845719_1	false
2244	interacts with	WP_027843178_1 (interacts with) WP_070396036_1	false
2245	interacts with	WP_027843178_1 (interacts with) WP_096728455_2	false
2247	interacts with	WP_027843178_1 (interacts with) WP_167717694_3	false
2248	interacts with	WP_027843178_1 (interacts with) WP_124970176_6	false
2249	interacts with	WP_027843178_1 (interacts with) WP_015216084_5	false
2250	interacts with	WP_027843178_1 (interacts with) WP_096576757_1	false
2251	interacts with	WP_027843178_1 (interacts with) WP_006195640_4	false
2252	interacts with	WP_027843178_1 (interacts with) WP_167725682_2	false
2253	interacts with	WP_027843178_1 (interacts with) WP_169219633_3	false
2254	interacts with	WP_027843178_1 (interacts with) WP_015193424_3	false
2255	interacts with	WP_027843178_1 (interacts with) BAZ29283_1	false
2256	interacts with	WP_027843178_1 (interacts with) WP_015207767_1	false
2257	interacts with	WP_027843178_1 (interacts with) WP_019495762_1	false
2258	interacts with	WP_027843178_1 (interacts with) WP_096730381_2	false
2259	interacts with	WP_027843178_1 (interacts with) WP_106218514_1	false
2260	interacts with	WP_027843178_1 (interacts with) WP_015207767_4	false
2261	interacts with	WP_027843178_1 (interacts with) WP_096580419_1	false
2262	interacts with	WP_027843178_1 (interacts with) WP_011321056_5	false
2263	interacts with	WP_027843178_1 (interacts with) BAZ29283_3	false
2264	interacts with	WP_027843178_1 (interacts with) WP_096569967_3	false
2265	interacts with	WP_027843178_1 (interacts with) WP_086769105_4	false
2266	interacts with	WP_027843178_1 (interacts with) WP_070396036_3	false
2267	interacts with	WP_027843178_1 (interacts with) CEJ45116_2	false
2268	interacts with	WP_027843178_1 (interacts with) WP_087539234_4	false
2270	interacts with	WP_027843178_1 (interacts with) WP_155746097_2	false
2271	interacts with	WP_027843178_1 (interacts with) WP_096569967_5	false
2272	interacts with	WP_027843178_1 (interacts with) WP_015207763_1	false
2273	interacts with	WP_027843178_1 (interacts with) WP_099068319_5	false
2274	interacts with	WP_027843178_1 (interacts with) WP_096569967_4	false
2276	interacts with	WP_027843178_1 (interacts with) WP_008178764_1	false
2277	interacts with	WP_027843178_1 (interacts with) WP_124970176_14	false
2278	interacts with	WP_027843178_1 (interacts with) WP_106240815_2	false
2279	interacts with	WP_027843178_1 (interacts with) WP_017748579_3	false
2280	interacts with	WP_027843178_1 (interacts with) WP_096689510_2	false
2281	interacts with	WP_027843178_1 (interacts with) WP_011321056_1	false
2282	interacts with	WP_027843178_1 (interacts with) WP_015216084_7	false
2283	interacts with	WP_027843178_1 (interacts with) WP_027843178_2	false
2284	interacts with	WP_027843178_1 (interacts with) WP_089091039_3	false
2285	interacts with	WP_027843178_1 (interacts with) WP_086769105_3	false
2286	interacts with	WP_027843178_1 (interacts with) CEJ45116_1	false
2287	interacts with	WP_027843178_1 (interacts with) WP_017314970_2	false
2288	interacts with	WP_027843178_1 (interacts with) WP_106240815_3	false
2289	interacts with	WP_027843178_1 (interacts with) WP_015216084_6	false
2290	interacts with	WP_027843178_1 (interacts with) WP_017314970_1	false
2291	interacts with	WP_027843178_1 (interacts with) WP_027843178_3	false
2292	interacts with	WP_027843178_1 (interacts with) WP_127078868_1	false
2293	interacts with	WP_027843178_1 (interacts with) WP_015207767_5	false
2294	interacts with	WP_114082527_7 (interacts with) WP_162399505_5	false
2295	interacts with	WP_114082527_7 (interacts with) WP_138499068_8	false
2296	interacts with	WP_114082527_7 (interacts with) RCJ30949_9	false
2297	interacts with	WP_114082527_7 (interacts with) WP_096664869_5	false
2298	interacts with	WP_114082527_7 (interacts with) WP_015127932_1	false
2299	interacts with	WP_114082527_7 (interacts with) WP_012409362_9	false
2300	interacts with	WP_114082527_7 (interacts with) WP_015127932_7	false
2301	interacts with	WP_114082527_7 (interacts with) WP_015210601_6	false
2302	interacts with	WP_114082527_7 (interacts with) WP_038089561_4	false
2303	interacts with	WP_114082527_7 (interacts with) OBQ18754_3	false
2304	interacts with	WP_096689510_5 (interacts with) WP_099068319_4	false
2305	interacts with	WP_096689510_5 (interacts with) WP_070396036_1	false
2306	interacts with	WP_096689510_5 (interacts with) WP_124155194_2	false
2307	interacts with	WP_096689510_5 (interacts with) WP_087542717_3	false
2308	interacts with	WP_096689510_5 (interacts with) WP_017318973_3	false
2309	interacts with	WP_096689510_5 (interacts with) WP_096537472_3	false
2310	interacts with	WP_096689510_5 (interacts with) WP_087592205_6	false
2311	interacts with	WP_096689510_5 (interacts with) WP_070396036_3	false
2312	interacts with	WP_096689510_5 (interacts with) CEJ45116_2	false
2313	interacts with	WP_096689510_5 (interacts with) WP_038089561_4	false
2314	interacts with	WP_096689510_5 (interacts with) WP_099700413_4	false
2315	interacts with	WP_096689510_5 (interacts with) WP_124970176_14	false
2316	interacts with	WP_096689510_5 (interacts with) WP_106240815_2	false
2317	interacts with	WP_096689510_5 (interacts with) WP_017748579_3	false
2318	interacts with	WP_096689510_5 (interacts with) WP_006197379_2	false
2319	interacts with	WP_096689510_5 (interacts with) WP_096689510_2	false
2320	interacts with	WP_096689510_5 (interacts with) WP_086760950_4	false
2321	interacts with	WP_096689510_5 (interacts with) WP_099700413_2	false
2323	interacts with	WP_096689510_5 (interacts with) WP_152591271_1	false
2324	interacts with	WP_096689510_5 (interacts with) WP_086769105_3	false
2325	interacts with	WP_096689510_5 (interacts with) WP_138499827_4	false
2326	interacts with	WP_096689510_5 (interacts with) WP_017314970_2	false
2327	interacts with	WP_096689510_5 (interacts with) WP_096689510_6	false
2328	interacts with	WP_096689510_5 (interacts with) WP_068385845_3	false
2329	interacts with	WP_017314970_3 (interacts with) WP_099068319_4	false
2330	interacts with	WP_017314970_3 (interacts with) WP_011610106_2	false
2331	interacts with	WP_017314970_3 (interacts with) WP_138498533_4	false
2332	interacts with	WP_017314970_3 (interacts with) WP_015216084_5	false
2333	interacts with	WP_017314970_3 (interacts with) WP_015212417_1	false
2334	interacts with	WP_017314970_3 (interacts with) WP_167725682_2	false
2335	interacts with	WP_017314970_3 (interacts with) WP_096559014_5	false
2336	interacts with	WP_017314970_3 (interacts with) WP_053455886_1	false
2337	interacts with	WP_017314970_3 (interacts with) BBD63560_4	false
2338	interacts with	WP_017314970_3 (interacts with) WP_087542717_3	false
2339	interacts with	WP_017314970_3 (interacts with) WP_096730381_2	false
2340	interacts with	WP_017314970_3 (interacts with) WP_071107270_1	false
2341	interacts with	WP_017314970_3 (interacts with) WP_096537472_3	false
2342	interacts with	WP_017314970_3 (interacts with) WP_017721129_1	false
2343	interacts with	WP_017314970_3 (interacts with) RCJ19623_1	false
2344	interacts with	WP_017314970_3 (interacts with) WP_070396036_3	false
2345	interacts with	WP_017314970_3 (interacts with) WP_015212417_3	false
2346	interacts with	WP_017314970_3 (interacts with) WP_155746097_2	false
2347	interacts with	WP_017314970_3 (interacts with) WP_099068319_5	false
2348	interacts with	WP_017314970_3 (interacts with) TAE59458_3	false
2349	interacts with	WP_017314970_3 (interacts with) WP_009343975_1	false
2350	interacts with	WP_017314970_3 (interacts with) WP_016950446_1	false
2351	interacts with	WP_017314970_3 (interacts with) WP_087542717_2	false
2352	interacts with	WP_017314970_3 (interacts with) WP_096559014_4	false
2353	interacts with	WP_017314970_3 (interacts with) WP_099700413_4	false
2354	interacts with	WP_017314970_3 (interacts with) WP_013190203_1	false
2355	interacts with	WP_017314970_3 (interacts with) WP_106240815_2	false
2356	interacts with	WP_017314970_3 (interacts with) WP_015212417_2	false
2357	interacts with	WP_017314970_3 (interacts with) WP_011321056_1	false
2358	interacts with	WP_017314970_3 (interacts with) WP_027843178_1	false
2359	interacts with	WP_017314970_3 (interacts with) WP_096689510_5	false
2360	interacts with	WP_017314970_3 (interacts with) WP_012595952_5	false
2361	interacts with	WP_017314970_3 (interacts with) WP_138499827_5	false
2362	interacts with	WP_017314970_3 (interacts with) WP_019505167_2	false
2363	interacts with	WP_017314970_3 (interacts with) WP_099700413_2	false
2364	interacts with	WP_017314970_3 (interacts with) WP_152591271_1	false
2365	interacts with	WP_017314970_3 (interacts with) WP_086769105_3	false
2366	interacts with	WP_017314970_3 (interacts with) OBQ01900_3	false
2367	interacts with	WP_017314970_3 (interacts with) WP_019499235_2	false
2368	interacts with	WP_017314970_3 (interacts with) TVP62740_1	false
2369	interacts with	WP_017314970_3 (interacts with) WP_068385845_3	false
2370	interacts with	WP_017314970_3 (interacts with) WP_017314970_1	false
2371	interacts with	WP_017314970_3 (interacts with) WP_027845719_1	false
2372	interacts with	WP_017314970_3 (interacts with) WP_070396036_1	false
2373	interacts with	WP_017314970_3 (interacts with) WP_124155194_2	false
2374	interacts with	WP_017314970_3 (interacts with) WP_096728455_2	false
2375	interacts with	WP_017314970_3 (interacts with) WP_015197629_3	false
2376	interacts with	WP_017314970_3 (interacts with) WP_105222244_2	false
2377	interacts with	WP_017314970_3 (interacts with) WP_169219633_3	false
2378	interacts with	WP_017314970_3 (interacts with) WP_015193424_3	false
2379	interacts with	WP_017314970_3 (interacts with) WP_096681247_5	false
2380	interacts with	WP_017314970_3 (interacts with) WP_096580419_1	false
2381	interacts with	WP_017314970_3 (interacts with) WP_019505167_3	false
2382	interacts with	WP_017314970_3 (interacts with) WP_011321056_5	false
2383	interacts with	WP_017314970_3 (interacts with) WP_096569967_3	false
2384	interacts with	WP_017314970_3 (interacts with) WP_086769105_4	false
2385	interacts with	WP_017314970_3 (interacts with) WP_096569967_5	false
2386	interacts with	WP_017314970_3 (interacts with) WP_096681247_2	false
2387	interacts with	WP_017314970_3 (interacts with) WP_044449859_1	false
2388	interacts with	WP_017314970_3 (interacts with) WP_096569967_4	false
2389	interacts with	WP_017314970_3 (interacts with) WP_103138325_3	false
2390	interacts with	WP_017314970_3 (interacts with) WP_124970176_14	false
2391	interacts with	WP_017314970_3 (interacts with) WP_015189896_1	false
2392	interacts with	WP_017314970_3 (interacts with) WP_017748579_3	false
2393	interacts with	WP_017314970_3 (interacts with) WP_071189061_2	false
2394	interacts with	WP_017314970_3 (interacts with) WP_006197379_2	false
2395	interacts with	WP_017314970_3 (interacts with) WP_015197629_1	false
2396	interacts with	WP_017314970_3 (interacts with) WP_027843178_2	false
2397	interacts with	WP_017314970_3 (interacts with) WP_015155263_3	false
2398	interacts with	WP_017314970_3 (interacts with) WP_086835908_1	false
2399	interacts with	WP_017314970_3 (interacts with) WP_017314970_2	false
2400	interacts with	WP_017314970_3 (interacts with) WP_106240815_3	false
2401	interacts with	WP_017314970_3 (interacts with) WP_096689510_6	false
2402	interacts with	WP_017314970_3 (interacts with) WP_027843178_3	false
2403	interacts with	WP_017314970_3 (interacts with) BBD63560_1	false
2404	interacts with	WP_086760950_4 (interacts with) WP_167721203_2	false
2406	interacts with	WP_015216084_12 (interacts with) WP_168643398_7	false
2407	interacts with	WP_015216084_12 (interacts with) WP_086760950_11	false
2408	interacts with	WP_015216084_12 (interacts with) WP_006513161_3	false
2409	interacts with	WP_015216084_12 (interacts with) WP_015216084_10	false
2411	interacts with	WP_015216084_12 (interacts with) AVH79456_7	false
2412	interacts with	WP_015216084_12 (interacts with) WP_167721203_10	false
2413	interacts with	WP_015216084_12 (interacts with) WP_096589596_10	false
2414	interacts with	WP_015216084_12 (interacts with) WP_035150190_3	false
2417	interacts with	WP_131089594_1 (interacts with) WP_096285992_1	false
2419	interacts with	WP_131089594_1 (interacts with) WP_166841243_2	false
2420	interacts with	WP_131089594_1 (interacts with) SLE69095_1	false
2421	interacts with	WP_131089594_1 (interacts with) WP_142936832_1	false
2422	interacts with	WP_131089594_1 (interacts with) SLE69095_3	false
2423	interacts with	WP_131089594_1 (interacts with) WP_166841243_1	false
2424	interacts with	WP_131089594_1 (interacts with) WP_052856102_2	false
2426	interacts with	WP_131089594_1 (interacts with) WP_061955677_1	false
2427	interacts with	WP_131089594_1 (interacts with) WP_091465037_2	false
2429	interacts with	WP_131089594_1 (interacts with) WP_061955677_2	false
2431	interacts with	WP_131089594_1 (interacts with) WP_131089594_2	false
2432	interacts with	WP_131089594_1 (interacts with) AFR27446_2	false
2434	interacts with	WP_131089594_1 (interacts with) WP_104291723_2	false
2436	interacts with	WP_131089594_1 (interacts with) WP_091465037_1	false
2438	interacts with	WP_103138325_4 (interacts with) AVH79628_3	false
2439	interacts with	WP_096664869_2 (interacts with) WP_162399505_1	false
2440	interacts with	WP_096664869_2 (interacts with) WP_096559014_1	false
2441	interacts with	WP_096664869_2 (interacts with) WP_066383651_5	false
2442	interacts with	WP_096664869_2 (interacts with) WP_096536886_5	false
2443	interacts with	WP_096664869_2 (interacts with) WP_015212417_1	false
2444	interacts with	WP_096664869_2 (interacts with) WP_066383651_1	false
2445	interacts with	WP_096664869_2 (interacts with) WP_099071810_2	false
2446	interacts with	WP_096664869_2 (interacts with) WP_015113151_1	false
2447	interacts with	WP_096664869_2 (interacts with) WP_167725682_2	false
2449	interacts with	WP_096664869_2 (interacts with) WP_006195640_1	false
2450	interacts with	WP_096664869_2 (interacts with) WP_096559014_5	false
2452	interacts with	WP_096664869_2 (interacts with) RCJ30949_1	false
2453	interacts with	WP_096664869_2 (interacts with) WP_089091039_1	false
2454	interacts with	WP_096664869_2 (interacts with) BAZ29283_1	false
2455	interacts with	WP_096664869_2 (interacts with) WP_096730381_2	false
2456	interacts with	WP_096664869_2 (interacts with) WP_073639381_1	false
2457	interacts with	WP_096664869_2 (interacts with) WP_015113151_4	false
2458	interacts with	WP_096664869_2 (interacts with) WP_138499068_4	false
2459	interacts with	WP_096664869_2 (interacts with) WP_088242795_2	false
2460	interacts with	WP_096664869_2 (interacts with) CEJ45116_2	false
2461	interacts with	WP_096664869_2 (interacts with) WP_062295185_1	false
2462	interacts with	WP_096664869_2 (interacts with) WP_087539234_4	false
2463	interacts with	WP_096664869_2 (interacts with) WP_015210601_6	false
2464	interacts with	WP_096664869_2 (interacts with) WP_015212417_3	false
2465	interacts with	WP_096664869_2 (interacts with) WP_099071810_1	false
2466	interacts with	WP_096664869_2 (interacts with) WP_009343975_1	false
2467	interacts with	WP_096664869_2 (interacts with) TAE59458_3	false
2468	interacts with	WP_096664869_2 (interacts with) WP_087539234_7	false
2469	interacts with	WP_096664869_2 (interacts with) WP_016950446_1	false
2470	interacts with	WP_096664869_2 (interacts with) WP_096559014_4	false
2471	interacts with	WP_096664869_2 (interacts with) WP_013190203_1	false
2472	interacts with	WP_096664869_2 (interacts with) OBQ18754_2	false
2473	interacts with	WP_096664869_2 (interacts with) WP_096575011_6	false
2474	interacts with	WP_096664869_2 (interacts with) WP_015212417_2	false
2475	interacts with	WP_096664869_2 (interacts with) WP_011321056_1	false
2476	interacts with	WP_096664869_2 (interacts with) WP_069073064_6	false
2477	interacts with	WP_096664869_2 (interacts with) RCJ30949_2	false
2478	interacts with	WP_096664869_2 (interacts with) WP_071189061_3	false
2479	interacts with	WP_096664869_2 (interacts with) WP_069073064_1	false
2481	interacts with	WP_096664869_2 (interacts with) RCJ30949_3	false
2482	interacts with	WP_096664869_2 (interacts with) CEJ45116_1	false
2483	interacts with	WP_096664869_2 (interacts with) WP_012409362_6	false
2484	interacts with	WP_096664869_2 (interacts with) WP_015127932_1	false
2485	interacts with	WP_096664869_2 (interacts with) WP_096536886_1	false
2486	interacts with	WP_096664869_2 (interacts with) BAZ29283_4	false
2487	interacts with	WP_096664869_2 (interacts with) TVP62740_1	false
2488	interacts with	WP_096664869_2 (interacts with) WP_096575011_3	false
2489	interacts with	WP_096664869_2 (interacts with) WP_168496018_1	false
2490	interacts with	WP_096664869_2 (interacts with) WP_099068319_6	false
2491	interacts with	WP_096664869_2 (interacts with) RCJ30949_4	false
2492	interacts with	WP_096664869_2 (interacts with) WP_138499068_1	false
2494	interacts with	WP_096664869_2 (interacts with) WP_069073064_8	false
2495	interacts with	WP_096664869_2 (interacts with) WP_168645325_1	false
2496	interacts with	WP_096664869_2 (interacts with) WP_096681247_5	false
2497	interacts with	WP_096664869_2 (interacts with) WP_069073064_5	false
2498	interacts with	WP_096664869_2 (interacts with) RCJ14929_3	false
2499	interacts with	WP_096664869_2 (interacts with) WP_015127932_2	false
2501	interacts with	WP_096664869_2 (interacts with) WP_015127932_3	false
2502	interacts with	WP_096664869_2 (interacts with) WP_089091039_2	false
2503	interacts with	WP_096664869_2 (interacts with) WP_138499068_5	false
2504	interacts with	WP_096664869_2 (interacts with) WP_011321056_5	false
2505	interacts with	WP_096664869_2 (interacts with) BAZ29283_3	false
2506	interacts with	WP_096664869_2 (interacts with) OBQ36138_1	false
2507	interacts with	WP_096664869_2 (interacts with) WP_096569967_3	false
2508	interacts with	WP_096664869_2 (interacts with) WP_096569967_5	false
2509	interacts with	WP_096664869_2 (interacts with) WP_096681247_2	false
2510	interacts with	WP_096664869_2 (interacts with) WP_044449859_1	false
2511	interacts with	WP_096664869_2 (interacts with) WP_096569967_4	false
2512	interacts with	WP_096664869_2 (interacts with) WP_012409362_8	false
2513	interacts with	WP_096664869_2 (interacts with) WP_015127932_4	false
2514	interacts with	WP_096664869_2 (interacts with) WP_168465654_1	false
2515	interacts with	WP_096664869_2 (interacts with) WP_073644071_5	false
2516	interacts with	WP_096664869_2 (interacts with) WP_071189061_2	false
2517	interacts with	WP_096664869_2 (interacts with) WP_096559014_8	false
2518	interacts with	WP_096664869_2 (interacts with) WP_006197379_2	false
2519	interacts with	WP_096664869_2 (interacts with) WP_012409362_5	false
2520	interacts with	WP_096664869_2 (interacts with) WP_027402982_2	false
2521	interacts with	WP_096664869_2 (interacts with) WP_006195640_7	false
2522	interacts with	WP_096664869_2 (interacts with) WP_066383651_2	false
2523	interacts with	WP_096664869_2 (interacts with) WP_089091039_3	false
2524	interacts with	WP_096664869_2 (interacts with) RCJ30949_5	false
2525	interacts with	WP_096664869_2 (interacts with) WP_017314970_2	false
2526	interacts with	WP_096664869_2 (interacts with) WP_096575011_2	false
2527	interacts with	WP_096664869_2 (interacts with) WP_099071810_6	false
2528	interacts with	WP_096664869_2 (interacts with) WP_087539234_2	false
2529	interacts with	WP_096664869_2 (interacts with) WP_066383651_4	false
2530	interacts with	BAZ33272_4 (interacts with) WP_053455886_1	false
2531	interacts with	BAZ33272_4 (interacts with) BBD63560_4	false
2533	interacts with	WP_016864763_2 (interacts with) WP_171977306_3	false
2534	interacts with	WP_016864763_2 (interacts with) AVH79535_2	false
2535	interacts with	WP_016864763_2 (interacts with) WP_106300787_1	false
2537	interacts with	WP_016864763_2 (interacts with) WP_151696789_3	false
2539	interacts with	WP_016864763_2 (interacts with) WP_096679519_4	false
2541	interacts with	WP_019505167_4 (interacts with) WP_019505167_1	false
2542	interacts with	WP_019505167_4 (interacts with) WP_019505167_3	false
2543	interacts with	WP_019505167_4 (interacts with) WP_019505167_2	false
2544	interacts with	WP_019505167_4 (interacts with) WP_002735885_4	false
2545	interacts with	WP_019505167_4 (interacts with) WP_096728455_2	false
2547	interacts with	WP_138499068_6 (interacts with) RCJ30949_4	false
2548	interacts with	WP_138499068_6 (interacts with) WP_096559014_1	false
2549	interacts with	WP_138499068_6 (interacts with) WP_138499068_1	false
2550	interacts with	WP_138499068_6 (interacts with) WP_026100063_3	false
2551	interacts with	WP_138499068_6 (interacts with) WP_066383651_5	false
2552	interacts with	WP_138499068_6 (interacts with) WP_137906310_1	false
2553	interacts with	WP_138499068_6 (interacts with) WP_012409362_4	false
2554	interacts with	WP_138499068_6 (interacts with) WP_103136595_2	false
2555	interacts with	WP_138499068_6 (interacts with) WP_104387267_1	false
2556	interacts with	WP_138499068_6 (interacts with) WP_012409362_2	false
2557	interacts with	WP_138499068_6 (interacts with) WP_069073064_4	false
2558	interacts with	WP_138499068_6 (interacts with) WP_168645325_1	false
2559	interacts with	WP_138499068_6 (interacts with) WP_099071810_2	false
2561	interacts with	WP_138499068_6 (interacts with) WP_096681247_3	false
2562	interacts with	WP_138499068_6 (interacts with) WP_114082527_2	false
2563	interacts with	WP_138499068_6 (interacts with) WP_096559014_5	false
2564	interacts with	WP_138499068_6 (interacts with) WP_026100063_4	false
2565	interacts with	WP_138499068_6 (interacts with) WP_096681247_5	false
2566	interacts with	WP_138499068_6 (interacts with) WP_011321056_2	false
2567	interacts with	WP_138499068_6 (interacts with) WP_009343975_2	false
2568	interacts with	WP_138499068_6 (interacts with) BAZ29283_1	false
2569	interacts with	WP_138499068_6 (interacts with) WP_069073064_5	false
2570	interacts with	WP_138499068_6 (interacts with) WP_096559014_6	false
2571	interacts with	WP_138499068_6 (interacts with) WP_038089561_2	false
2572	interacts with	WP_138499068_6 (interacts with) WP_096730381_2	false
2573	interacts with	WP_138499068_6 (interacts with) WP_015127932_2	false
2574	interacts with	WP_138499068_6 (interacts with) WP_057178590_1	false
2575	interacts with	WP_138499068_6 (interacts with) WP_026100063_2	false
2576	interacts with	WP_138499068_6 (interacts with) WP_138499068_5	false
2577	interacts with	WP_138499068_6 (interacts with) WP_011321056_5	false
2578	interacts with	WP_138499068_6 (interacts with) BAZ29283_3	false
2579	interacts with	WP_138499068_6 (interacts with) WP_012409362_7	false
2580	interacts with	WP_138499068_6 (interacts with) WP_073644071_4	false
2581	interacts with	WP_138499068_6 (interacts with) WP_066383651_6	false
2582	interacts with	WP_138499068_6 (interacts with) WP_138499068_4	false
2583	interacts with	WP_138499068_6 (interacts with) OBQ36138_1	false
2584	interacts with	WP_138499068_6 (interacts with) WP_096569967_3	false
2585	interacts with	WP_138499068_6 (interacts with) WP_087592205_6	false
2586	interacts with	WP_138499068_6 (interacts with) WP_096569967_5	false
2587	interacts with	WP_138499068_6 (interacts with) TAE59458_1	false
2588	interacts with	WP_138499068_6 (interacts with) WP_096681247_2	false
2589	interacts with	WP_138499068_6 (interacts with) TAE59458_3	false
2590	interacts with	WP_138499068_6 (interacts with) WP_009343975_1	false
2591	interacts with	WP_138499068_6 (interacts with) WP_016950446_1	false
2592	interacts with	WP_138499068_6 (interacts with) WP_087539234_7	false
2593	interacts with	WP_138499068_6 (interacts with) WP_138499068_8	false
2594	interacts with	WP_138499068_6 (interacts with) WP_012409362_8	false
2595	interacts with	WP_138499068_6 (interacts with) WP_096559014_4	false
2596	interacts with	WP_138499068_6 (interacts with) WP_015127932_4	false
2597	interacts with	WP_138499068_6 (interacts with) WP_015078657_2	false
2598	interacts with	WP_138499068_6 (interacts with) WP_168465654_1	false
2599	interacts with	WP_138499068_6 (interacts with) WP_073644071_5	false
2600	interacts with	WP_138499068_6 (interacts with) WP_016950446_3	false
2601	interacts with	WP_138499068_6 (interacts with) WP_013190203_1	false
2602	interacts with	WP_138499068_6 (interacts with) WP_096559014_8	false
2603	interacts with	WP_138499068_6 (interacts with) WP_071189061_2	false
2604	interacts with	WP_138499068_6 (interacts with) OBQ18754_2	false
2605	interacts with	WP_138499068_6 (interacts with) WP_006197379_2	false
2606	interacts with	WP_138499068_6 (interacts with) WP_096681247_6	false
2607	interacts with	WP_138499068_6 (interacts with) WP_012409362_5	false
2608	interacts with	WP_138499068_6 (interacts with) WP_011321056_1	false
2609	interacts with	WP_138499068_6 (interacts with) WP_027402982_2	false
2610	interacts with	WP_138499068_6 (interacts with) WP_012595952_5	false
2611	interacts with	WP_138499068_6 (interacts with) WP_069073064_6	false
2612	interacts with	WP_138499068_6 (interacts with) RCJ30949_2	false
2613	interacts with	WP_138499068_6 (interacts with) WP_066383651_2	false
2614	interacts with	WP_138499068_6 (interacts with) WP_096664869_2	false
2615	interacts with	WP_138499068_6 (interacts with) WP_089091039_4	false
2616	interacts with	WP_138499068_6 (interacts with) WP_073644071_8	false
2617	interacts with	WP_138499068_6 (interacts with) WP_069073064_1	false
2618	interacts with	WP_138499068_6 (interacts with) WP_114082527_5	false
2619	interacts with	WP_138499068_6 (interacts with) WP_096730381_1	false
2620	interacts with	WP_138499068_6 (interacts with) WP_012409362_6	false
[truncated: 28,497 more rows]
