# Supplementary material for: Understanding thioamitide biosynthesis using pathway engineering and untargeted metabolomics
Source: Royal Society of Chemistry journal article supplement (doi:10.1039/d0sc06835g), 2021-01-01
Supplement: d0sc06835g3.cys [file d0sc06835g3.cys › CytoscapeSession-2021_03_29-10_56/tables/61-cc_1.to.202.txt/LOCAL_ATTRS-org.cytoscape.model.CyNode-cc_1.to.202.txt+default+node.cytable]

CyCSV-Version	1
SUID	name	selected
java.lang.Long	java.lang.String	java.lang.Boolean
cc_1.to.202.txt default node
71	WP_162399505_1	false
72	WP_096559014_1	false
74	WP_138498533_4	false
76	WP_066383651_5	false
78	WP_096536886_5	false
80	WP_015212417_1	false
82	WP_006195640_4	false
84	WP_099071810_2	false
86	WP_015113151_1	false
88	WP_096559014_5	false
90	BAZ29283_1	false
92	WP_096730381_2	false
94	WP_073639381_1	false
96	WP_162399505_5	false
98	WP_026100063_2	false
100	CEJ45116_2	false
102	WP_062295185_1	false
104	WP_087539234_4	false
106	WP_015210601_6	false
108	CEJ45116_5	false
110	WP_099071810_1	false
112	WP_009343975_1	false
114	TAE59458_3	false
116	WP_016950446_1	false
118	WP_087539234_7	false
120	WP_096559014_4	false
122	WP_013190203_1	false
124	WP_106240815_2	false
126	WP_096575011_6	false
128	OBQ18754_2	false
130	WP_015212417_2	false
132	WP_011321056_1	false
134	WP_069073064_6	false
136	RCJ30949_2	false
138	WP_071189061_3	false
140	WP_069073064_1	false
142	CEJ45116_1	false
144	OBQ01900_3	false
146	WP_096536886_1	false
148	TVP62740_1	false
150	BAZ29283_4	false
152	WP_096575011_3	false
154	WP_168496018_1	false
156	RCJ30949_4	false
158	WP_087539234_1	false
160	WP_096728455_2	false
162	WP_168645325_1	false
164	WP_096681247_5	false
166	WP_069073064_5	false
168	RCJ14929_3	false
170	WP_089091039_2	false
172	WP_011321056_5	false
174	BAZ29283_3	false
176	WP_162399505_4	false
178	OBQ36138_1	false
180	WP_096569967_3	false
182	WP_096569967_5	false
184	TVP62740_6	false
186	WP_096681247_2	false
188	WP_044449859_1	false
190	WP_096569967_4	false
192	WP_006195640_2	false
194	WP_168465654_1	false
196	WP_073644071_5	false
198	WP_096559014_8	false
200	WP_071189061_2	false
202	WP_006195640_7	false
204	WP_066383651_2	false
206	WP_089091039_3	false
208	WP_015155263_3	false
210	WP_026100063_6	false
212	WP_096575011_2	false
214	RCJ30949_5	false
216	WP_099071810_6	false
218	WP_066383651_4	false
221	WP_096730381_1	false
223	WP_096569967_6	false
224	OBQ36138_3	false
226	WP_114082527_7	false
228	WP_015078657_10	false
230	WP_137906310_5	false
232	WP_096664869_5	false
234	WP_168496018_3	false
236	OBQ18150_1	false
238	WP_057178590_8	false
240	BAZ29283_7	false
242	WP_148763415_5	false
244	WP_071189061_4	false
246	WP_009343975_4	false
248	WP_168465654_4	false
250	WP_168501874_4	false
252	WP_168645325_4	false
255	WP_013190203_4	false
257	WP_027402982_8	false
259	WP_038089561_4	false
261	OBQ18754_3	false
263	WP_168357543_5	false
265	WP_011610106_2	false
267	WP_124155194_2	false
269	WP_124970176_6	false
271	WP_015216084_5	false
273	WP_167725682_2	false
275	WP_073591536_1	false
277	WP_006619051_7	false
279	WP_087542717_3	false
281	WP_163927072_1	false
284	WP_106218514_1	false
286	AVH79535_6	false
288	WP_012597836_5	false
290	WP_015216084_10	false
292	WP_096580419_1	false
294	WP_012597836_4	false
296	WP_109013279_1	false
298	WP_017721129_1	false
300	WP_086769105_4	false
302	WP_070396036_3	false
304	WP_127086205_3	false
306	WP_127086205_4	false
308	WP_168643398_4	false
310	WP_099068319_5	false
313	WP_087542717_2	false
315	WP_103138325_3	false
317	WP_124970176_14	false
319	WP_017748579_3	false
321	WP_006197379_2	false
323	WP_096689510_2	false
325	WP_138499827_1	false
327	WP_002735885_4	false
329	WP_096689510_5	false
331	WP_012595952_5	false
333	TRT88208_1	false
335	WP_138499827_5	false
337	WP_012409787_3	false
339	WP_086769105_3	false
341	WP_006513161_3	false
343	AVH79607_2	false
345	WP_138499827_4	false
348	WP_086835908_1	false
351	WP_017314970_2	false
353	WP_106240815_3	false
355	WP_096689510_6	false
357	WP_017314970_1	false
359	WP_066371470_6	false
360	WP_062346719_1	false
362	WP_155349848_2	false
364	WP_155349848_3	false
366	WP_155358788_2	false
368	WP_062339008_4	false
370	WP_066371470_2	false
372	WP_062339008_5	false
374	WP_066371470_1	false
376	WP_062339008_2	false
378	WP_066371470_7	false
380	WP_155358788_1	false
385	WP_015207767_1	false
387	WP_096537472_3	false
394	WP_015216084_6	false
396	WP_068385845_3	false
400	WP_015207767_4	false
403	WP_087592205_6	false
406	WP_015207763_1	false
415	WP_027843178_3	false
417	WP_106289349_2	false
419	WP_138689268_3	false
420	WP_138666048_2	false
422	WP_052856102_3	false
424	WP_079181075_4	false
426	WP_079189213_2	false
428	WP_127931424_2	false
430	WP_049976882_1	false
432	WP_167721203_10	false
433	WP_168643398_7	false
435	WP_070396036_1	false
437	WP_099700413_2	false
439	WP_086760950_11	false
441	WP_099700413_4	false
443	WP_096589596_10	false
446	WP_079191916_3	false
447	WP_052680420_4	false
449	WP_051708270_1	false
451	WP_051837683_4	false
453	WP_079191916_2	false
455	WP_107777750_1	false
457	ALC22075_5	false
459	WP_133890759_3	false
461	WP_109595189_5	false
463	WP_157846946_1	false
465	WP_051837683_5	false
467	WP_052680420_3	false
469	WP_051700182_4	false
471	WP_157846946_2	false
473	WP_055704502_1	false
475	WP_052856102_2	false
477	WP_109595189_2	false
479	WP_093619522_5	false
481	WP_051700182_2	false
483	WP_052680420_2	false
485	WP_055704502_2	false
487	WP_130878496_1	false
489	WP_093619522_1	false
491	WP_093619522_4	false
493	WP_133890759_2	false
496	WP_145487439_1	false
498	WP_109595189_1	false
500	WP_145487439_2	false
502	WP_104258544_2	false
504	WP_170198719_1	false
506	WP_019505167_1	false
507	WP_019505167_3	false
509	WP_019505167_2	false
511	WP_086769105_5	false
516	WP_052269673_2	false
517	WP_136238412_3	false
519	WP_019501955_13	false
520	WP_019501955_9007	false
522	WP_019501955_10	false
524	ANS68054_2	false
526	WP_053706403_3	false
528	AWS47415_3	false
530	WP_053706403_2	false
533	WP_106115031_4	false
535	ANS68054_1	false
537	WP_017198207_2	false
541	ALC22075_1	false
543	WP_130878496_5	false
545	WP_093619522_3	false
552	WP_079181075_2	false
560	WP_158686821_1	false
564	SNT25203_1	false
567	AWS47415_2	false
569	WP_052680420_1	false
571	SNT25203_4	false
573	WP_016570561_2	false
576	WP_051837683_3	false
582	WP_130878496_2	false
590	WP_051700182_1	false
592	PZN41733_2	false
594	WP_016570561_1	false
597	WP_159425899_2	false
599	WP_051708270_2	false
602	WP_089091039_1	false
605	WP_103136595_2	false
607	TVP62740_2	false
609	WP_069073064_4	false
617	WP_009343975_2	false
619	WP_038089561_2	false
621	WP_103136595_3	false
623	WP_015139846_1	false
626	WP_015113151_4	false
628	WP_057178590_1	false
630	WP_096575011_4	false
637	WP_015212417_3	false
639	WP_066383651_3	false
641	TAE59458_1	false
649	WP_016950446_3	false
653	WP_096537472_5	false
658	WP_089091039_4	false
663	WP_062295185_6	false
667	WP_096536886_4	false
671	RCJ30949_6	false
673	WP_099068319_6	false
676	WP_137906310_1	false
678	WP_104387267_1	false
681	WP_096559014_6	false
684	WP_038089561_1	false
686	RCJ14929_1	false
691	WP_073644071_4	false
693	WP_066383651_6	false
697	WP_006195640_9	false
699	WP_087539234_3	false
702	WP_006195640_5	false
705	WP_069073064_7	false
707	WP_006195640_8	false
711	WP_062295185_4	false
719	WP_087539234_6	false
723	WP_073644071_8	false
725	WP_073644071_2	false
727	WP_096537472_2	false
731	WP_096620064_1	false
735	WP_087539234_2	false
737	WP_096589596_4	false
740	WP_167721203_3	false
742	AVH79628_3	false
744	WP_015216084_7	false
747	WP_086760950_4	false
751	RCJ19623_1	false
754	WP_167721203_2	false
756	WP_104899482_2	false
758	WP_019501037_1	false
760	RCJ19623_5	false
762	AVH79456_4	false
764	WP_019495762_1	false
765	WP_099068319_4	false
767	WP_027845719_1	false
772	BAZ42602_1	false
775	WP_017318973_3	false
778	AVH79456_3	false
790	WP_106300787_1	false
795	WP_027843178_2	false
802	WP_127078868_1	false
804	WP_096688632_1	false
806	WP_052808529_1	false
809	WP_164394909_1	false
811	WP_068150862_3	false
814	PZN41733_3	false
817	WP_170198719_2	false
819	WP_091097544_2	false
825	WP_139979956_2	false
827	WP_015659226_4	false
830	WP_078760724_1	false
833	WP_159688203_1	false
838	WP_068150862_2	false
846	WP_060892878_4	false
849	WP_071107270_1	false
850	WP_027845719_2	false
852	BBD63560_2	false
855	WP_096580419_3	false
858	WP_035150190_4	false
862	WP_053455886_3	false
864	WP_006513161_2	false
866	WP_099068319_2	false
868	WP_096688632_2	false
870	WP_015197629_3	false
873	RCJ40850_1	false
875	WP_169219633_3	false
877	RCJ40850_2	false
879	AVH79535_2	false
881	WP_053455886_1	false
883	BBD63560_4	false
886	WP_068385845_2	false
891	WP_088242795_2	false
893	WP_011610106_1	false
896	BBD63560_3	false
899	WP_015189896_3	false
901	WP_068385845_4	false
903	WP_169219633_1	false
906	WP_012597836_3	false
908	WP_027845719_3	false
910	WP_124970176_11	false
912	WP_012597836_6	false
914	WP_012597836_7	false
916	WP_163670238_2	false
918	WP_105222244_3	false
921	WP_106240815_1	false
926	WP_073643028_3	false
928	WP_015197629_1	false
930	WP_053455886_2	false
932	WP_027843178_1	false
935	WP_017748579_1	false
939	OBQ01900_2	false
942	WP_071107270_2	false
947	WP_015210601_2	false
952	WP_087542717_5	false
954	WP_099068319_7	false
956	BBD63560_1	false
971	WP_138499068_4	false
1000	WP_138499068_1	false
1008	WP_138499068_5	false
1022	WP_044449859_3	false
1030	AFY52807_3	false
1031	AFY52807_4	false
1034	WP_169219633_2	false
1044	ANI93503_3	false
1047	ANI93503_1	false
1049	ANI93503_6	false
1053	WP_125821548_1	false
1055	WP_051840628_1	false
1057	WP_128433866_2	false
1058	WP_153461219_4	false
1061	WP_139627778_2	false
1064	WP_017198207_3	false
1067	WP_068210304_3	false
1069	WP_155862233_4	false
1071	WP_141936425_3	false
1073	WP_054237388_3	false
1075	WP_051851944_3	false
1077	WP_068210304_1	false
1081	WP_141936425_2	false
1083	WP_071383933_2	false
1085	WP_164312175_3	false
1087	AGP61345_4	false
1090	WP_083744359_2	false
1093	WP_030169499_4	false
1096	WP_153461219_3	false
1107	BAY08128_2	false
1112	WP_015216084_4	false
1120	WP_086689015_2	false
1125	BAY08128_1	false
1130	WP_168357543_1	false
1136	WP_015127932_4	false
1141	WP_027402982_2	false
1144	WP_017314970_3	false
1150	RCJ40334_5	false
1154	WP_017314970_4	false
1166	WP_167725682_4	false
1168	WP_104296401_5	false
1169	WP_142936832_1	false
1171	SLE69095_1	false
1173	SLE69095_3	false
1175	WP_166841243_1	false
1177	WP_091465037_2	false
1180	WP_133616643_3	false
1183	AGP61345_5	false
1185	AOX46105_2	false
1187	WP_062071413_1	false
1190	AFR27446_2	false
1192	WP_073644071_1	false
1232	WP_096664869_2	false
1290	WP_086760950_12	false
1292	TVP63782_5	false
1295	WP_171977306_3	false
1304	WP_106300787_3	false
1306	BAZ42602_5	false
1313	AVH79535_8	false
1327	WP_019496925_3	false
1331	WP_019501955_12	false
1344	WP_044206131_2	false
1351	AVH79607_5	false
1358	WP_155358788_3	false
1362	WP_086829041_1	false
1364	WP_164312175_2	false
1366	WP_059262025_2	false
1369	WP_073726342_1	false
1371	WP_054237388_4	false
1385	WP_086769105_2	false
1388	TAE59458_2	false
1395	WP_089091039_5	false
1438	WP_012409362_6	false
1449	WP_026100063_3	false
1464	WP_012409362_8	false
1474	WP_012409362_5	false
1485	WP_015113151_6	false
1487	WP_096559014_7	false
1489	WP_138499068_8	false
1491	RCJ30949_9	false
1494	WP_012409362_9	false
1501	CEJ45116_6	false
1506	TVP62740_4	false
1509	TAG67909_1	false
1512	AVH79535_1	false
1516	WP_171977306_1	false
1520	RCJ19623_2	false
1522	WP_096688632_7	false
1524	WP_099700413_1	false
1529	WP_163927072_2	false
1541	WP_138498533_3	false
1550	WP_096688632_5	false
1552	WP_106371152_5	false
1554	WP_138499827_3	false
1558	WP_019496925_1	false
1561	WP_124970176_9	false
1576	WP_106289349_3	false
1580	WP_035150190_3	false
1586	WP_087592205_11	false
1588	WP_138499827_2	false
1591	WP_066371470_4	false
1594	WP_062339008_1	false
1596	WP_062339008_3	false
1599	WP_066371470_3	false
1606	WP_155349848_1	false
1610	WP_066371470_5	false
1612	WP_062346719_2	false
1620	WP_068385845_6	false
1627	WP_073591536_4	false
1638	WP_017581465_1	false
1642	WP_062346719_3	false
1678	WP_015078657_2	false
1682	WP_012409362_4	false
1693	WP_026100063_4	false
1736	WP_015127932_1	false
1750	WP_012409362_2	false
1753	WP_114082527_2	false
1756	WP_011321056_2	false
1762	WP_015127932_2	false
1767	WP_012409362_7	false
1791	WP_096681247_6	false
1800	WP_114082527_5	false
1812	WP_015127932_7	false
1815	TAE59458_6	false
1820	WP_051840194_2	false
1821	WP_018960901_1	false
1824	WP_009079852_1	false
1826	WP_141310912_1	false
1828	WP_058047489_1	false
1831	WP_051418997_1	false
1833	WP_097866484_1	false
1835	WP_093908736_1	false
1837	WP_159770677_1	false
1839	WP_126393842_1	false
1841	WP_120754718_1	false
1843	WP_051840194_1	false
1845	WP_106331017_2	false
1847	WP_143043955_1	false
1849	WP_062295185_3	false
1850	WP_127086205_5	false
1951	RCJ40334_3	false
1953	WP_167721203_8	false
1963	WP_162398402_1	false
1967	WP_155746097_1	false
1971	WP_012409787_4	false
1988	WP_017198207_5	false
1998	WP_159425899_3	false
2011	WP_019499235_2	false
2015	WP_019501955_6	false
2034	WP_015207767_5	false
2036	WP_096579222_1	false
2044	WP_015113151_3	false
2084	WP_019501955_4	false
2096	WP_015216084_8	false
2099	WP_138498533_6	false
2104	AVH79628_2	false
2129	WP_163699711_3	false
2134	WP_066383651_1	false
2140	WP_011321056_8	false
2155	WP_026100063_7	false
2178	WP_096576757_1	false
2182	WP_096576751_1	false
2186	WP_015193424_5	false
2188	WP_105222244_2	false
2191	WP_015193424_3	false
2205	WP_087542717_4	false
2207	WP_068385845_5	false
2210	WP_015193424_4	false
2213	WP_015189896_1	false
2223	WP_015189896_2	false
2227	BAZ33272_4	false
2237	WP_035150190_1	false
2239	WP_096689510_4	false
2246	WP_167717694_3	false
2269	WP_155746097_2	false
2275	WP_008178764_1	false
2322	WP_152591271_1	false
2405	WP_015216084_12	false
2410	AVH79456_7	false
2415	WP_131089594_1	false
2416	WP_096285992_1	false
2418	WP_166841243_2	false
2425	WP_061955677_1	false
2428	WP_061955677_2	false
2430	WP_131089594_2	false
2433	WP_104291723_2	false
2435	WP_091465037_1	false
2437	WP_103138325_4	false
2448	WP_006195640_1	false
2451	RCJ30949_1	false
2480	RCJ30949_3	false
2493	WP_069073064_8	false
2500	WP_015127932_3	false
2532	WP_016864763_2	false
2536	WP_151696789_3	false
2538	WP_096679519_4	false
2540	WP_019505167_4	false
2546	WP_138499068_6	false
2560	WP_096681247_3	false
2635	BAY08128_4	false
2640	WP_096620064_2	false
2648	WP_015207763_6	false
2653	WP_015207767_3	false
2656	BAZ29283_2	false
2662	WP_015207763_3	false
2667	WP_096681247_8	false
2670	WP_096681247_4	false
2676	WP_015207763_5	false
2684	BAZ29283_5	false
2714	WP_109595189_4	false
2719	WP_137451632_4	false
2732	WP_137451632_3	false
2745	WP_137451632_2	false
2747	WP_149853923_1	false
2748	WP_086820178_1	false
2750	WP_143043955_3	false
2753	WP_086820173_3	false
2755	WP_051707308_3	false
2757	WP_109003510_2	false
2759	WP_069887141_1	false
2777	WP_015155263_1	false
2926	WP_104258544_1	false
2929	WP_138666048_1	false
2931	WP_091097544_1	false
2934	WP_138689268_2	false
2936	WP_153461219_2	false
2946	WP_127931424_1	false
3006	WP_163699711_2	false
3038	WP_096728455_1	false
3070	WP_096689510_1	false
3094	WP_078760724_2	false
3100	WP_114082527_3	false
3182	WP_079151368_1	false
3183	ANI93503_5	false
3185	WP_051859750_2	false
3191	WP_051707308_1	false
3197	WP_052269673_3	false
3199	WP_169242999_3	false
3204	WP_167717694_2	false
3290	WP_006195640_6	false
3304	WP_087539234_9	false
3322	WP_096575011_7	false
3325	BAZ30575_1	false
3334	WP_114082527_4	false
3352	TVP62740_3	false
3368	WP_012409362_3	false
3378	WP_009343975_6	false
3391	WP_096536886_3	false
3396	WP_062295185_5	false
3410	WP_073639381_2	false
3414	WP_104291723_4	false
3415	AFR27446_1	false
3422	WP_061955677_4	false
3426	WP_142936832_2	false
3430	WP_168688294_2	false
3433	WP_096285992_2	false
3442	WP_017318973_2	false
3446	WP_019501955_9	false
3449	WP_017749323_2	false
3513	WP_045870710_1	false
3520	WP_167717694_4	false
3611	WP_086689015_1	false
3616	WP_127086205_6	false
3634	WP_106240815_4	false
3640	WP_086760950_9	false
3648	WP_127086205_1	false
3653	WP_104899482_4	false
3655	WP_096589596_8	false
3666	BAZ42602_3	false
3748	AOX46105_3	false
3752	WP_008380405_4	false
3755	WP_122818055_9006	false
3759	WP_060892878_3	false
3773	WP_086760950_3	false
3854	WP_072808981_1	false
3856	WP_072713661_1	false
3859	WP_031017311_2	false
3861	WP_157857956_1	false
3898	WP_167725682_1	false
3914	WP_086769105_1	false
3942	WP_016864763_1	false
4094	WP_019499235_3	false
4097	WP_102939117_1	false
4109	AVH79535_4	false
4121	WP_096580419_2	false
4124	WP_017748579_2	false
4155	WP_151696789_1	false
4198	WP_099700413_3	false
4253	SAP16385_2	false
4254	WP_164390060_1	false
4257	WP_017585895_3	false
4259	WP_017585895_2	false
4262	QKI29067_1	false
4265	ROV70439_1	false
4267	WP_164496180_1	false
4269	WP_044386376_2	false
4275	WP_051857755_1	false
4362	WP_162399505_2	false
4500	WP_109497443_2	false
4554	WP_087542717_1	false
4677	WP_084890433_4	false
4681	WP_084890433_2	false
4755	WP_015212417_6	false
4770	WP_089091039_7	false
4785	BAY08128_3	false
4786	WP_096730381_3	false
4788	WP_167725682_3	false
5080	WP_035150190_2	false
5095	RCJ14929_6	false
5194	WP_129307298_4	false
5195	WP_052269673_6	false
5216	TVP63782_4	false
5325	WP_096575011_5	false
5328	WP_062295185_7	false
5399	WP_104387267_4	false
5406	TCN71580_1	false
5407	WP_129307298_2	false
5410	WP_103811802_2	false
5413	WP_087811088_2	false
5528	WP_114082527_6	false
5644	WP_011321056_3	false
5660	WP_011321056_4	false
5663	CEJ45116_3	false
5784	WP_013321440_1	false
5806	WP_103136595_1	false
5830	WP_017318973_1	false
5945	WP_089126836_1	false
5948	WP_169264744_1	false
5950	WP_169264746_1	false
5965	WP_115965582_2	false
5969	WP_012868258_1	false
5971	WP_115965582_3	false
5973	WP_068028504_2	false
5975	WP_012868258_2	false
6148	WP_026100063_1	false
6157	WP_138499068_2	false
6230	WP_129307298_3	false
6232	WP_052269673_4	false
6364	WP_099068319_3	false
6384	AVH79628_5	false
6397	WP_096679519_2	false
6407	WP_073644071_6	false
6411	WP_096589596_7	false
6423	WP_086760950_7	false
6434	WP_167721203_6	false
6441	WP_015207767_6	false
6484	RCJ14929_2	false
6544	WP_012409787_5	false
6642	WP_087539234_5	false
6670	WP_010996095_1	false
6690	WP_051715083_4	false
6692	WP_095933898_2	false
6788	AVH79628_4	false
6801	AVH79662_2	false
6846	WP_015659226_2	false
6975	WP_015198131_3	false
6993	WP_096590410_2	false
7004	WP_141720451_1	false
7013	WP_044206131_1	false
7025	WP_127086205_2	false
7031	WP_096559014_3	false
7035	BAZ42602_2	false
7058	WP_026100063_5	false
7076	WP_019499235_1	false
7082	WP_057178590_4	false
7085	WP_068385845_1	false
7101	WP_019499235_5	false
7201	WP_124271963_1	false
7205	WP_107115831_1	false
7213	WP_096622718_1	false
7215	WP_022929317_2	false
7220	WP_029630331_2	false
7297	WP_166282462_1	false
7309	BBD66616_1	false
7337	WP_104899482_7	false
7341	WP_062071413_2	false
7445	AVH79535_7	false
7449	WP_133890759_4	false
7454	WP_053560627_3	false
7464	WP_161481447_1	false
7465	WP_161481447_5	false
7467	WP_161481447_3	false
7471	WP_161481447_6	false
7614	WP_051817283_2	false
7630	WP_015197629_2	false
7651	WP_015155263_4	false
7663	WP_093831028_1	false
7675	WP_017585895_1	false
7681	WP_096730381_4	false
7957	WP_109497443_3	false
7983	WP_099071810_3	false
8005	RCJ14929_4	false
8041	WP_096569967_1	false
8074	WP_096569967_2	false
8082	WP_015212417_4	false
8319	AVH79662_3	false
8552	WP_138498533_2	false
8571	WP_087592205_9	false
8577	WP_096589596_3	false
8794	WP_019499235_4	false
8806	WP_019496925_2	false
8811	WP_018550639_1	false
9284	WP_089126833_1	false
9352	WP_017749323_1	false
9382	WP_055533290_1	false
9434	WP_019501955_3	false
9747	WP_068099584_3	false
9756	WP_008380405_2	false
10216	WP_017581465_2	false
10258	WP_105222244_1	false
10291	ANI93503_2	false
10354	AVH79535_5	false
10362	AVH79535_3	false
10421	WP_096536886_6	false
10792	WP_030169499_3	false
10813	WP_148763415_2	false
11115	WP_163927072_3	false
11117	WP_019501037_2	false
11220	ALC22075_2	false
11423	WP_062295185_2	false
11424	WP_096575011_1	false
11426	WP_015157989_1	false
11582	WP_168643398_6	false
11634	WP_086689015_3	false
11711	WP_096590413_2	false
11994	WP_096688632_3	false
12000	WP_016950446_2	false
12003	WP_017749323_3	false
12005	WP_096689510_3	false
12012	WP_029630331_3	false
12027	WP_141720451_2	false
12164	WP_017581465_4	false
12173	WP_017581465_3	false
12352	WP_096285992_3	false
12884	WP_029630331_1	false
13094	WP_049802506_1	false
13167	WP_083744359_3	false
13181	WP_094742457_2	false
13393	WP_051436687_2	false
13811	WP_087539234_8	false
13845	WP_106300787_4	false
14036	WP_051438280_1	false
14162	RCJ40850_3	false
14722	WP_130475988_1	false
14864	WP_129307298_1	false
14958	WP_114054648_1	false
14965	WP_161481447_4	false
14969	WP_057178590_3	false
15226	WP_124155194_1	false
15315	RCJ19623_3	false
15465	WP_040022866_2	false
15470	WP_121024930_1	false
15495	WP_079189213_1	false
15546	OLE73832_2	false
15548	WP_020390834_2	false
15549	WP_020390834_1	false
16529	WP_071383933_3	false
17291	WP_068099584_2	false
17306	WP_015113151_2	false
17529	WP_084520237_1	false
17862	WP_086820178_3	false
17868	WP_096537472_4	false
17873	WP_166282462_2	false
17901	WP_015207763_4	false
18251	WP_003963573_2	false
18397	WP_162944541_1	false
18399	WP_015155263_2	false
18671	WP_027402982_6	false
18839	WP_016864763_4	false
18846	WP_035150190_5	false
19913	WP_052269673_5	false
21460	TWH40986_3	false
22276	AFY52807_1	false
22690	WP_167407701_3	false
23167	WP_006195640_10	false
23322	WP_016950446_6	false
23351	WP_010996095_4	false
23426	WP_070396421_4	false
23438	WP_089505437_1	false
23580	WP_017617392_1	false
24919	WP_103138325_5	false
24978	WP_161481447_7	false
25077	WP_088242795_3	false
26356	WP_086820173_1	false
26425	WP_168643398_9	false
27127	AFY52807_2	false
27164	WP_038089561_5	false
27181	WP_144873874_1	false
27414	WP_106237513_1	false
27421	WP_015194417_3	false
28409	WP_096559440_1	false
28410	WP_015216396_1	false
28412	WP_026732589_1	false
28414	WP_096561092_1	false
28416	WP_073619367_1	false
28418	WP_062294404_2	false
28420	WP_095720237_1	false
28422	WP_096583741_1	false
28424	WP_045869173_2	false
28426	WP_127056592_1	false
28428	BAZ80283_1	false
28430	WP_168491601_1	false
28432	WP_017320198_1	false
28434	WP_016950293_1	false
28436	WP_029637656_3	false
28438	WP_026093360_1	false
28440	WP_013190653_1	false
28442	RCJ34841_1	false
28444	WP_015116255_2	false
28446	WP_089092704_1	false
28448	WP_017315790_1	false
28450	WP_010996620_1	false
28452	WP_169219905_1	false
28454	WP_162399305_2	false
28456	WP_039742608_1	false
28458	WP_006196066_1	false
28460	TWH40986_1	false
28462	TVP62142_1	false
28464	BAZ15600_2	false
28466	WP_096680266_1	false
28468	WP_103138934_1	false
28470	RCJ31639_2	false
28472	WP_071187741_1	false
28550	WP_027840959_1	false
28637	TAE58797_1	false
28671	BAZ41701_1	false
28766	BAZ29305_1	false
28943	WP_096659345_1	false
28979	WP_016874828_1	false
29015	WP_066380047_1	false
29139	WP_073631441_1	false
29228	WP_087592205_5	false
29229	WP_124970176_8	false
29231	WP_096679519_3	false
29232	RCJ40334_1	false
29234	WP_167721203_4	false
29236	AVH79662_4	false
29238	WP_012409787_2	false
29240	WP_104899482_3	false
29241	TVP63782_3	false
29243	WP_012595952_3	false
29245	WP_096589596_5	false
29247	WP_015216084_3	false
29249	WP_168643398_3	false
29251	WP_104899482_1	false
29253	WP_106371152_2	false
29258	WP_073591536_3	false
29260	WP_073643028_4	false
29267	WP_086760950_5	false
29271	BAZ33272_2	false
29281	WP_103138325_7	false
29297	WP_138498533_1	false
29306	RCJ40334_2	false
29311	WP_087592205_3	false
29319	WP_073643028_1	false
29336	WP_073591536_5	false
29350	TCN71580_2	false
29351	CNF13542_3	false
29417	WP_106371152_6	false
29433	WP_012409787_1	false
29434	WP_086760950_2	false
29436	WP_167721203_5	false
29438	WP_087592205_2	false
29440	WP_012409787_8	false
29442	TVP63782_1	false
29444	WP_086760950_1	false
29446	WP_012595952_1	false
29448	WP_096589596_1	false
29450	WP_015216084_1	false
29452	WP_015216084_2	false
29454	AVH79607_1	false
29456	WP_096679519_1	false
29458	AVH79456_1	false
29460	AVH79628_1	false
29462	WP_012597836_1	false
29464	WP_096589596_2	false
29466	WP_168643398_1	false
29468	WP_124970176_1	false
29470	WP_087592205_4	false
29472	AVH79662_1	false
29493	WP_012595952_2	false
29515	WP_087592205_1	false
29548	TVP63782_2	false
29603	WP_103138325_1	false
29628	WP_167721203_1	false
29670	AVH79456_2	false
29742	WP_168643398_2	false
29831	WP_096681247_10	false
29832	WP_015127932_5	false
29834	WP_010996095_3	false
29836	WP_015212417_7	false
29838	TVP62740_5	false
29840	WP_057178590_6	false
29842	CEJ45116_4	false
29844	WP_073644071_3	false
29846	WP_069073064_2	false
29848	TAE59458_4	false
29850	WP_071189061_1	false
29854	WP_138499068_3	false
29856	RCJ14929_5	false
29862	WP_016950446_4	false
29866	WP_099071810_4	false
29879	WP_096536886_2	false
29881	WP_015210601_1	false
29896	WP_026100063_9	false
29922	WP_096569967_7	false
29933	RCJ30949_12	false
29949	WP_011321056_7	false
29971	WP_013190203_2	false
29980	WP_120754718_2	false
29981	WP_107115831_3	false
29983	WP_044377254_1	false
29985	WP_097866484_2	false
29987	WP_126393842_2	false
29989	WP_141310912_2	false
29991	WP_051840194_5	false
29993	WP_018960901_2	false
29995	WP_114054648_2	false
29997	WP_159770677_3	false
29998	WP_158686821_3	false
30000	WP_159688203_2	false
30003	WP_124271963_2	false
30010	WP_031017311_1	false
30012	WP_096622718_4	false
30017	WP_125506282_1	false
30038	WP_073726342_2	false
30050	WP_093908736_2	false
30067	WP_051746348_1	false
30113	WP_157857956_2	false
30141	WP_058047489_2	false
30159	WP_015127932_6	false
30160	WP_114082527_8	false
30162	WP_138499068_7	false
30164	WP_071189061_5	false
30165	WP_096569967_9	false
30167	WP_013190203_3	false
30169	WP_057178590_7	false
30171	WP_009343975_3	false
30175	WP_016950446_5	false
30177	WP_015212417_5	false
30181	BAZ29283_6	false
30182	WP_069073064_3	false
30185	WP_066383651_7	false
30187	WP_103136595_4	false
30189	WP_096681247_9	false
30191	WP_011321056_6	false
30193	WP_010996095_2	false
30200	WP_012409362_10	false
30204	WP_026100063_8	false
30211	WP_015210601_4	false
30214	WP_124970176_5	false
30215	WP_087592205_7	false
30217	WP_167721203_9	false
30219	WP_012597836_8	false
30221	WP_096589596_11	false
30223	WP_012595952_4	false
30225	WP_086760950_10	false
30228	TVP63782_7	false
30231	WP_168643398_8	false
30238	WP_012409787_6	false
30240	BBD66616_5	false
30242	AVH79607_6	false
30246	AVH79662_6	false
30248	WP_015216084_11	false
30250	AVH79456_6	false
30263	WP_019501037_4	false
30316	WP_104899482_6	false
30331	AVH79628_6	false
30358	WP_096679519_5	false
30370	WP_103138325_9	false
30385	WP_105988468_5	false
30386	WP_107397356_1	false
30388	WP_088612422_2	false
30390	WP_162681093_4	false
30392	WP_016898474_1	false
30394	WP_129202808_2	false
30396	WP_037567380_3	false
30398	WP_030061393_1	false
30400	WP_096547181_5	false
30402	WP_102695456_1	false
30404	WP_027975917_4	false
30406	EES41370_3	false
30408	WP_068252194_2	false
30421	WP_017569537_2	false
30431	WP_104263878_2	false
30436	WP_068208510_2	false
30489	WP_088679810_1	false
30520	WP_103031749_1	false
30534	WP_017595611_9003	false
30535	WP_129307706_1	false
30537	WP_065960366_1	false
30539	BAN83919_1	false
30541	WP_161634174_2	false
30543	WP_159037419_1	false
30545	BBC15200_1	false
30547	WP_046417231_1	false
30551	WP_020634200_1	false
30553	WP_131980220_1	false
30556	WP_091117926_2	false
30562	WP_018962004_1	false
30571	WP_106236741_1	false
30573	WP_044449646_1	false
30580	WP_030193573_1	false
30618	WP_039653089_1	false
30632	WP_062348671_4	false
30633	WP_131969051_2	false
30635	PZN45587_1	false
30637	WP_137248807_4	false
30639	WP_161483240_4	false
30641	WP_062348671_3	false
30642	CNF13542_5	false
30644	WP_062437448_3	false
30646	WP_161483240_3	false
30648	WP_131969051_3	false
30650	WP_137248807_3	false
30672	WP_030452416_3	false
30679	WP_030452416_4	false
30680	WP_062437448_4	false
30687	CNF13542_1	false
30713	WP_168501874_1	false
30714	WP_168501874_2	false
30716	WP_015210601_5	false
30718	WP_168357543_6	false
30720	WP_015210601_3	false
30722	WP_168357543_2	false
30724	WP_137906310_6	false
30726	WP_168357543_4	false
30728	WP_096559014_9	false
30732	WP_137906310_3	false
30744	WP_137906310_2	false
30750	RCJ30949_11	false
30752	RCJ30949_7	false
30754	RCJ30949_8	false
30762	WP_096547181_4	false
30763	WP_088679810_2	false
30765	WP_104263878_1	false
30767	WP_027975917_3	false
30769	WP_068252194_1	false
30771	WP_068208510_1	false
30775	WP_088612422_3	false
30780	WP_107397356_2	false
30783	WP_037567380_2	false
30791	WP_129202808_1	false
30793	WP_017569537_3	false
30812	WP_162681093_3	false
30820	WP_060892878_2	false
30821	WP_141720451_4	false
30823	WP_104258544_3	false
30825	WP_133890759_1	false
30827	WP_079181075_3	false
30829	WP_015659226_1	false
30831	WP_164312175_1	false
30833	WP_016570561_3	false
30835	WP_106115031_2	false
30841	WP_052856102_1	false
30851	WP_071383933_4	false
30859	WP_054237388_2	false
30879	WP_133890759_5	false
30880	WP_053560627_1	false
30882	WP_128433866_1	false
30884	WP_136238412_1	false
30886	WP_051851944_1	false
30888	WP_109497443_4	false
30894	WP_083744359_1	false
30900	WP_060892878_6	false
30902	WP_164312175_5	false
30903	WP_042407705_1	false
30914	WP_015659226_5	false
30918	WP_139627778_1	false
30926	GFH39519_2	false
30927	WP_104779873_2	false
30929	WP_051727186_2	false
30931	WP_097216730_1	false
30933	WP_121750537_1	false
30935	WP_141754588_2	false
30936	WP_107501676_2	false
30938	WP_078077257_1	false
30940	WP_135072443_1	false
30942	WP_055421432_2	false
30945	WP_052479947_3	false
30955	PIR21572_1	false
30991	WP_044377254_2	false
30992	WP_096622718_2	false
30994	WP_018960901_3	false
30996	WP_107115831_4	false
30998	WP_124271963_3	false
31000	WP_126393842_3	false
31001	WP_031017311_4	false
31004	WP_120754718_5	false
31005	WP_141310912_3	false
31008	WP_058047489_3	false
31011	WP_051840194_4	false
31017	WP_097866484_4	false
31035	WP_091465037_3	false
31036	WP_062071413_3	false
31038	AFR27446_3	false
31040	WP_061955677_5	false
31043	WP_104291723_5	false
31046	WP_168688294_1	false
31052	WP_096285992_4	false
31058	WP_142936832_3	false
31065	WP_141366901_2	false
31068	WP_131089594_5	false
31075	WP_166841243_3	false
31092	PZN45587_2	false
31093	WP_131969051_1	false
31095	WP_062348671_1	false
31097	WP_030452416_1	false
31099	WP_062437448_1	false
31101	WP_145982885_1	false
31103	WP_161483240_1	false
31114	CNF13542_4	false
31122	WP_137248807_1	false
31135	WP_148763415_6	false
31136	OBQ36138_2	false
31138	OBQ18754_4	false
31139	WP_168357543_3	false
31142	WP_137906310_4	false
31147	WP_168645325_6	false
31153	WP_096664869_7	false
31160	WP_168465654_6	false
31168	WP_015078657_9	false
31180	WP_153321593_2	false
31181	WP_122818055_3	false
31183	WP_084520237_3	false
31185	WP_115965582_1	false
31187	WP_068028504_3	false
31189	WP_008380405_3	false
31197	WP_092602219_1	false
31203	WP_155862233_6	false
31209	KQB97104_1	false
31210	WP_110278359_1	false
31212	WP_106358260_1	false
31214	WP_162197196_2	false
31216	WP_106743417_1	false
31218	WP_055189764_1	false
31220	WP_107498105_3	false
31237	WP_053706403_4	false
31238	WP_051708270_3	false
31240	WP_157846946_3	false
31242	WP_153461219_7	false
31244	WP_153461219_5	false
31247	WP_071383933_7	false
31249	WP_054237388_8	false
31251	WP_096664869_4	false
31252	WP_148763415_1	false
31254	WP_027402982_3	false
31257	WP_168465654_2	false
31261	WP_015078657_3	false
31266	OBQ18754_1	false
31272	WP_168645325_3	false
31279	WP_135072443_2	false
31280	WP_055421432_3	false
31282	WP_121750537_3	false
31284	WP_104779873_1	false
31286	WP_052479947_4	false
31288	WP_078077257_2	false
31292	WP_097216730_2	false
31307	WP_096664869_3	false
31308	WP_099068319_1	false
31310	WP_096537472_1	false
31312	BAZ33272_3	false
31314	WP_138498533_5	false
31316	WP_073643028_2	false
31328	WP_139627778_3	false
31329	WP_128433866_3	false
31331	WP_051851944_2	false
31333	WP_053560627_2	false
31335	WP_109497443_1	false
31338	WP_136238412_2	false
31342	WP_168465654_5	false
31343	WP_168645325_2	false
31345	WP_015078657_5	false
31348	WP_027402982_1	false
31352	WP_148763415_3	false
31357	WP_096664869_6	false
31363	WP_148763415_7	false
31364	WP_168645325_7	false
31366	WP_027402982_9	false
31368	WP_015078657_11	false
31370	WP_096664869_8	false
31372	WP_168465654_9	false
31384	WP_103138934_3	false
31385	WP_096561092_3	false
31387	BAZ29305_3	false
31389	WP_089092704_3	false
31392	WP_095720237_2	false
31395	TAE58797_2	false
31402	WP_012409237_4	false
31403	WP_094345265_3	false
31405	WP_006622760_5	false
31406	WP_006619051_2	false
31408	WP_109006830_2	false
31414	WP_012409237_1	false
31421	WP_112963677_2	false
31422	WP_042619690_5	false
31424	WP_067652746_2	false
31426	WP_062451377_1	false
31431	WP_111838980_1	false
31435	WP_062437448_2	false
31436	WP_161483240_2	false
31438	WP_030452416_2	false
31440	WP_062348671_2	false
31442	WP_137248807_2	false
31450	WP_067652746_3	false
31451	WP_111838980_2	false
31453	WP_112963677_3	false
31454	WP_062451377_2	false
31457	WP_042619690_6	false
31465	WP_012409237_5	false
31466	WP_094345265_4	false
31468	RCJ34841_3	false
31470	WP_138498765_2	false
31475	WP_144874993_3	false
31477	WP_028525980_3	false
31478	WP_109741224_4	false
31480	WP_122933410_1	false
31482	WP_166551441_2	false
31483	WP_141234752_1	false
31488	WP_051418997_2	false
31489	WP_157857956_3	false
31491	WP_106331017_5	false
31493	WP_093908736_5	false
31497	WP_094742457_4	false
31499	WP_092614753_1	false
31500	WP_135099815_2	false
31502	WP_116947187_1	false
31504	WP_069110514_1	false
31508	WP_135099815_3	false
31514	WP_073644071_7	false
31515	WP_096559014_2	false
31517	WP_096536886_7	false
31519	RCJ14929_7	false
31521	WP_099071810_5	false
31529	WP_047015652_2	false
31530	WP_051368293_2	false
31532	WP_159425396_2	false
31534	TDT36016_4	false
31536	WP_051642643_2	false
31544	WP_062348671_5	false
31545	WP_030452416_5	false
31547	WP_137248807_5	false
31550	WP_161483240_5	false
31554	WP_062437448_5	false
31559	WP_170198719_3	false
31560	AWS47415_7	false
31562	WP_078760724_3	false
31564	WP_137451632_5	false
31567	WP_141936425_5	false
31569	WP_016495430_1	false
31570	WP_109003510_1	false
31572	WP_015193424_1	false
31573	WP_015193424_2	false
31577	BAZ15600_3	false
31578	WP_026093360_2	false
31580	TWH40986_2	false
31582	WP_073619367_2	false
31587	BAZ86949_1	false
31588	WP_168646604_1	false
31590	WP_027403439_1	false
31592	OBQ23191_1	false
31597	WP_068252194_3	false
31598	WP_068208510_3	false
31600	KKT87137_2	false
31602	WP_125690181_3	false
31605	WP_015189896_4	false
31606	WP_096597905_1	false
31608	WP_105222244_4	false
31611	WP_099700413_5	false
31615	WP_086835908_9005	false
31616	WP_086835908_9006	false
31618	WP_086835908_9007	false
31620	WP_086835908_9004	false
31625	WP_008180360_6	false
31626	WP_087592205_10	false
31628	WP_008180360_8	false
31630	WP_008180360_5	false
31635	RZJ53728_2	false
31636	WP_047775239_1	false
31638	WP_166925083_1	false
31639	WP_047775239_2	false
31642	WP_037567380_1	false
31643	WP_096547181_3	false
31645	WP_162681093_2	false
31647	WP_141366901_1	false
31652	WP_053002257_1	false
31653	WP_052752730_1	false
31655	WP_007095313_1	false
31658	WP_114901352_1	false
31662	BBC15200_2	false
31663	WP_046417231_2	false
31665	WP_039653089_2	false
31667	WP_159037419_2	false
31672	WP_060892878_1	false
31673	WP_015659226_3	false
31675	WP_153461219_1	false
31678	WP_054237388_1	false
31681	BAZ15600_1	false
31682	WP_096620836_2	false
31684	RCJ34841_2	false
31687	BAU44627_3	false
31690	WP_086760950_8	false
31691	WP_104899482_5	false
31693	WP_096589596_9	false
31696	WP_167721203_7	false
31700	WP_168501874_3	false
31701	WP_168496018_2	false
31703	WP_104387267_2	false
31706	WP_027402982_5	false
31710	WP_146082522_1	false
31711	WP_094261964_1	false
31713	TCK41348_1	false
31716	WP_109006830_1	false
31717	WP_118166682_2	false
31719	WP_094345265_1	false
31722	WP_093619522_2	false
31723	WP_109595189_3	false
31725	WP_106331017_3	false
31728	WP_015140719_3	false
31729	WP_017655478_2	false
31731	WP_103138325_8	false
31734	WP_027402982_4	false
31735	WP_148763415_4	false
31737	WP_168645325_5	false
31740	ROV70439_4	false
31741	WP_060892878_5	false
31743	WP_164496180_2	false
31746	WP_164394909_2	false
31747	WP_052808529_2	false
31749	WP_049976882_3	false
31752	WP_015140719_1	false
31753	WP_103138325_2	false
31755	WP_017655478_1	false
31758	WP_053706403_1	false
31759	WP_055421432_1	false
31761	WP_035905443_2	false
31764	WP_071187741_3	false
31765	AGP61345_3	false
31767	BAZ80283_3	false
31769	WP_008180360_1	false
31770	WP_008180360_2	false
31772	WP_008180360_3	false
31775	WP_015126776_3	false
31776	WP_086837411_3	false
31778	WP_138498765_3	false
31781	WP_118166682_3	false
31782	WP_109006830_3	false
31784	WP_094345265_2	false
31787	WP_059262025_1	false
31788	WP_087811088_1	false
31790	WP_103811802_1	false
31793	WP_031017311_3	false
31794	WP_093908736_3	false
31796	WP_141310912_4	false
31799	WP_084520237_5	false
31800	PIR21572_3	false
31802	WP_068028504_5	false
31805	WP_138498765_1	false
31806	OUC15299_1	false
31808	WP_096537288_1	false
31811	AVH79628_7	false
31812	WP_096679519_6	false
31814	AVH79662_5	false
31816	WP_068150862_1	false
31817	ANI93503_4	false
31819	WP_068099584_1	false
31822	WP_082604641_1	false
31823	WP_079291565_2	false
31825	AGP61345_2	false
31827	WP_017315790_2	false
31828	WP_008232444_3	false
31830	WP_104386798_3	false
31833	SFK92261_4	false
31834	WP_125792341_3	false
31836	WP_093601002_3	false
31838	BAU44627_5	false
31839	RMF68567_2	false
31841	WP_172358022_2	false
31844	WP_042619690_1	false
31845	WP_067652746_1	false
31847	WP_112963677_1	false
31850	WP_092614753_2	false
31851	WP_116947187_2	false
31853	WP_069110514_2	false
31856	WP_165975342_5	false
31857	WP_165975342_4	false
31859	WP_165975342_2	false
31862	WP_006619051_1	false
31863	WP_006622760_6	false
31865	WP_006622760_4	false
31868	WP_012409787_7	false
31869	WP_073591536_6	false
31871	WP_168643398_5	false
31874	WP_097866484_3	false
31875	WP_107115831_2	false
31877	WP_096622718_3	false
31880	WP_051859750_1	false
31881	WP_095933898_1	false
31883	WP_051715083_2	false
31886	WP_073619916_1	false
31887	WP_096592804_1	false
31889	WP_167727925_1	false
31892	WP_171084023_2	false
31893	WP_157777555_2	false
31895	WP_055472496_2	false
31898	WP_051837683_7	false
31899	WP_052680420_6	false
31901	WP_051700182_5	false
31904	WP_141936425_1	false
31905	WP_084890433_1	false
31907	WP_030169499_1	false
31909	WP_116195863_2	false
31910	WP_045296661_2	false
31912	KQP70226_2	false
31915	WP_168880027_4	false
31916	WP_018486514_4	false
31918	WP_168880029_3	false
31921	WP_093601002_6	false
31922	WP_125792341_1	false
31924	SFK92261_3	false
31927	WP_052158149_1	false
31928	WP_141683807_1	false
31930	WP_153354547_2	false
31933	WP_051700182_3	false
31934	WP_052680420_5	false
31936	WP_051837683_2	false
31939	WP_068150862_4	false
31940	WP_068099584_4	false
31942	WP_086820178_2	false
31943	WP_086820173_2	false
31945	WP_013190653_2	false
31946	WP_062294404_1	false
31948	WP_096583741_2	false
31949	WP_015111489_1	false
31951	BAZ86949_2	false
31952	WP_137908690_1	false
31954	WP_168880029_2	false
31955	WP_168880027_2	false
31957	WP_094261964_2	false
31958	WP_146082522_3	false
31960	WP_069110514_3	false
31961	WP_116947187_3	false
31963	WP_051642643_1	false
31964	WP_047015652_1	false
31966	WP_118166682_5	false
31967	AFY52807_5	false
31969	RCJ31639_1	false
31970	WP_087542717_6	false
31972	WP_110256027_1	false
31973	WP_162060722_2	false
31975	WP_052752730_2	false
31976	WP_108116368_1	false
31978	WP_049802506_3	false
31979	WP_013321440_2	false
31981	BBD66616_4	false
31982	WP_006197379_1	false
31984	WP_096604516_1	false
31985	WP_086837411_1	false
31987	WP_089505437_2	false
31988	WP_014173637_1	false
31990	WP_156664522_1	false
31991	WP_156664522_2	false
31993	WP_079291565_3	false
31994	WP_082604641_3	false
31996	WP_128453384_1	false
31997	WP_107961734_1	false
31999	WP_015207763_2	false
32000	WP_015207767_2	false
32002	WP_102116354_1	false
32003	WP_110163988_1	false
32005	WP_075895564_1	false
32006	BAZ30575_2	false
32008	WP_120754718_4	false
32009	WP_058047489_4	false
32011	RCJ25433_2	false
32012	WP_073642495_1	false
32014	WP_087103312_2	false
32015	WP_067598320_2	false
32017	WP_006195640_3	false
32018	WP_089091039_6	false
32020	WP_008180360_7	false
32021	WP_096605992_7	false
32023	TKB91729_6	false
32024	TKB91729_3	false
32026	WP_155387558_1	false
32027	WP_051837683_6	false
32029	WP_093619522_6	false
32030	WP_109595189_6	false
32032	WP_016898474_2	false
32033	WP_030061393_3	false
32035	WP_026723183_3	false
32036	AYJ47579_1	false
32038	WP_096576751_3	false
32039	WP_096576757_3	false
32041	WP_015078657_8	false
32042	TAE59458_9010	false
32044	WP_006622760_12	false
32045	WP_006622760_11	false
32047	WP_155752488_3	false
32048	WP_017743137_4	false
32050	AOX46105_4	false
32051	WP_008380405_1	false
32053	WP_124155194_3	false
32054	WP_124142959_2	false
32056	WP_073619916_3	false
32057	WP_073619916_2	false
32059	WP_089126833_3	false
32060	WP_089126836_3	false
32062	WP_017311237_3	false
32063	WP_016863105_2	false
32065	WP_124970176_10	false
32066	OGQ08743_4	false
32068	WP_169264746_2	false
32069	WP_169264744_2	false
32071	WP_096547181_1	false
32072	WP_162681093_1	false
32074	WP_168880029_1	false
32075	WP_168880027_1	false
32077	WP_131089594_4	false
32078	WP_061955677_6	false
32080	WP_168880027_5	false
32081	WP_018486514_2	false
32083	WP_051840628_2	false
32084	WP_125821548_3	false
32086	WP_109497443_6	false
32087	WP_109497443_5	false
32089	WP_162060722_3	false
32090	WP_110256027_2	false
32092	WP_096680266_3	false
32093	WP_010996620_2	false
32095	WP_124200676_2	false
32096	WP_096604516_2	false
32098	PSB62113_1	false
32099	WP_083782609_1	false
32101	SNT25203_5	false
32102	AWS47415_4	false
32104	TCM33822_1	false
32105	WP_138897977_2	false
32107	WP_070396036_2	false
32108	WP_071107270_3	false
32110	WP_061955677_3	false
32111	WP_131089594_3	false
32113	WP_010996620_4	false
32114	WP_096680266_4	false
32116	WP_051642643_3	false
32117	WP_047015652_3	false
32119	WP_087103312_1	false
32120	WP_067598320_1	false
32122	WP_006196066_4	false
32123	TVP62142_3	false
32125	WP_110163988_3	false
32126	WP_102116354_3	false
32128	WP_015113151_5	false
32129	WP_096575011_8	false
32131	WP_127078868_2	false
32132	WP_019495762_2	false
32134	WP_012409362_1	false
32135	WP_114082527_1	false
32137	WP_017311237_2	false
32138	WP_016863105_1	false
32140	WP_096594214_3	false
32141	WP_086837411_2	false
32143	AFY52807_6	false
32144	RCJ25607_1	false
32146	WP_017743137_1	false
32147	WP_155752488_1	false
32149	WP_049976882_2	false
32150	WP_052808529_3	false
32152	WP_016950293_2	false
32153	WP_127056592_3	false
32155	WP_093116829_1	false
32156	WP_093601002_8	false
32158	WP_096681247_7	false
32159	WP_070396421_1	false
32161	WP_010996620_3	false
32162	WP_096680266_2	false
32164	BAU44627_2	false
32165	WP_172358022_1	false
32167	KQP70226_1	false
32168	WP_045296661_1	false
32170	WP_124970176_3	false
32171	OGQ08743_2	false
32173	WP_131076036_2	false
32174	WP_156170590_2	false
32176	WP_045296661_3	false
32177	KQP70226_3	false
32179	WP_169264746_3	false
32180	WP_169264744_3	false
32182	WP_084520237_4	false
32183	WP_068028504_4	false
32185	WP_067652746_4	false
32186	WP_062451377_3	false
32188	WP_155752488_4	false
32189	WP_017743137_5	false
32191	WP_095739934_1	false
32192	WP_145385118_2	false
32194	WP_051857755_3	false
32195	WP_121024930_2	false
32197	WP_015140719_2	false
32198	WP_096681247_1	false
32200	WP_131076036_1	false
32201	WP_130690339_1	false
32203	WP_017743137_2	false
32204	WP_155752488_2	false
32206	WP_088888836_2	false
32207	RNJ67588_1	false
32209	TVP63782_6	false
32210	AVH79456_5	false
32212	WP_096590410_1	false
32213	WP_096590413_1	false
32215	WP_125690181_2	false
32216	WP_123798532_3	false
32218	WP_129202808_4	false
32219	WP_106331017_1	false
32221	WP_015116255_1	false
32222	WP_096659345_2	false
32224	WP_045869173_3	false
32225	WP_073591536_7	false
32227	WP_096576751_2	false
32228	WP_096576757_2	false
32230	WP_150881471_1	false
32231	WP_138989358_1	false
32233	WP_006619051_3	false
32234	WP_006622760_10	false
32236	AVH79607_3	false
32237	WP_103138325_6	false
32239	WP_079189213_3	false
32240	WP_145487439_3	false
32242	WP_159529421_2	false
32243	AOX46105_1	false
32245	WP_045869173_1	false
32246	WP_096594214_1	false
32248	AWS47415_1	false
32249	SNT25203_2	false
32251	WP_016864763_5	false
32252	WP_106218514_2	false
32254	WP_089126833_2	false
32255	WP_089126836_2	false
