# Supplementary material for: Understanding thioamitide biosynthesis using pathway engineering and untargeted metabolomics
Source: Royal Society of Chemistry journal article supplement (doi:10.1039/d0sc06835g), 2021-01-01
Supplement: d0sc06835g3.cys [file d0sc06835g3.cys › CytoscapeSession-2021_03_29-10_56/tables/cytables.xml]

<?xml version="1.0" encoding="UTF-8" standalone="yes"?>
<cyTables>
    <virtualColumns>
        <virtualColumn name="shared name" sourceColumn="shared name" sourceTable="35-cc_1.to.202.txt/SHARED_ATTRS-org.cytoscape.model.CyNetwork-cc_1.to.202.txt+root+shared++network.cytable" sourceJoinKey="SUID" targetTable="51-51/LOCAL_ATTRS-org.cytoscape.model.CyNetwork-51+default+network.cytable" targetJoinKey="SUID" immutable="false"/>
        <virtualColumn name="shared name" sourceColumn="shared name" sourceTable="35-cc_1.to.202.txt/SHARED_ATTRS-org.cytoscape.model.CyEdge-cc_1.to.202.txt+root+shared++edge.cytable" sourceJoinKey="SUID" targetTable="35-cc_1.to.202.txt/LOCAL_ATTRS-org.cytoscape.model.CyEdge-cc_1.to.202.txt+root+default++edge.cytable" targetJoinKey="SUID" immutable="false"/>
        <virtualColumn name="shared interaction" sourceColumn="shared interaction" sourceTable="35-cc_1.to.202.txt/SHARED_ATTRS-org.cytoscape.model.CyEdge-cc_1.to.202.txt+root+shared++edge.cytable" sourceJoinKey="SUID" targetTable="35-cc_1.to.202.txt/LOCAL_ATTRS-org.cytoscape.model.CyEdge-cc_1.to.202.txt+root+default++edge.cytable" targetJoinKey="SUID" immutable="false"/>
        <virtualColumn name="HIT%ID" sourceColumn="HIT%ID" sourceTable="35-cc_1.to.202.txt/SHARED_ATTRS-org.cytoscape.model.CyEdge-cc_1.to.202.txt+root+shared++edge.cytable" sourceJoinKey="SUID" targetTable="35-cc_1.to.202.txt/LOCAL_ATTRS-org.cytoscape.model.CyEdge-cc_1.to.202.txt+root+default++edge.cytable" targetJoinKey="SUID" immutable="false"/>
        <virtualColumn name="SS%ID" sourceColumn="SS%ID" sourceTable="35-cc_1.to.202.txt/SHARED_ATTRS-org.cytoscape.model.CyEdge-cc_1.to.202.txt+root+shared++edge.cytable" sourceJoinKey="SUID" targetTable="35-cc_1.to.202.txt/LOCAL_ATTRS-org.cytoscape.model.CyEdge-cc_1.to.202.txt+root+default++edge.cytable" targetJoinKey="SUID" immutable="false"/>
        <virtualColumn name="EVALUE" sourceColumn="EVALUE" sourceTable="35-cc_1.to.202.txt/SHARED_ATTRS-org.cytoscape.model.CyEdge-cc_1.to.202.txt+root+shared++edge.cytable" sourceJoinKey="SUID" targetTable="35-cc_1.to.202.txt/LOCAL_ATTRS-org.cytoscape.model.CyEdge-cc_1.to.202.txt+root+default++edge.cytable" targetJoinKey="SUID" immutable="false"/>
        <virtualColumn name="MIN_COV_OPT" sourceColumn="MIN_COV_OPT" sourceTable="35-cc_1.to.202.txt/SHARED_ATTRS-org.cytoscape.model.CyEdge-cc_1.to.202.txt+root+shared++edge.cytable" sourceJoinKey="SUID" targetTable="35-cc_1.to.202.txt/LOCAL_ATTRS-org.cytoscape.model.CyEdge-cc_1.to.202.txt+root+default++edge.cytable" targetJoinKey="SUID" immutable="false"/>
        <virtualColumn name="shared name" sourceColumn="shared name" sourceTable="35-cc_1.to.202.txt/SHARED_ATTRS-org.cytoscape.model.CyNetwork-cc_1.to.202.txt+root+shared++network.cytable" sourceJoinKey="SUID" targetTable="35-cc_1.to.202.txt/LOCAL_ATTRS-org.cytoscape.model.CyNetwork-cc_1.to.202.txt+root+default++network.cytable" targetJoinKey="SUID" immutable="false"/>
        <virtualColumn name="shared name" sourceColumn="shared name" sourceTable="35-cc_1.to.202.txt/SHARED_ATTRS-org.cytoscape.model.CyNode-cc_1.to.202.txt+root+shared++node.cytable" sourceJoinKey="SUID" targetTable="51-51/LOCAL_ATTRS-org.cytoscape.model.CyNode-51+default+node.cytable" targetJoinKey="SUID" immutable="false"/>
        <virtualColumn name="Accession" sourceColumn="Accession" sourceTable="35-cc_1.to.202.txt/SHARED_ATTRS-org.cytoscape.model.CyNode-cc_1.to.202.txt+root+shared++node.cytable" sourceJoinKey="SUID" targetTable="51-51/LOCAL_ATTRS-org.cytoscape.model.CyNode-51+default+node.cytable" targetJoinKey="SUID" immutable="false"/>
        <virtualColumn name="Colour" sourceColumn="Colour" sourceTable="35-cc_1.to.202.txt/SHARED_ATTRS-org.cytoscape.model.CyNode-cc_1.to.202.txt+root+shared++node.cytable" sourceJoinKey="SUID" targetTable="51-51/LOCAL_ATTRS-org.cytoscape.model.CyNode-51+default+node.cytable" targetJoinKey="SUID" immutable="false"/>
        <virtualColumn name="Genus" sourceColumn="Genus" sourceTable="35-cc_1.to.202.txt/SHARED_ATTRS-org.cytoscape.model.CyNode-cc_1.to.202.txt+root+shared++node.cytable" sourceJoinKey="SUID" targetTable="51-51/LOCAL_ATTRS-org.cytoscape.model.CyNode-51+default+node.cytable" targetJoinKey="SUID" immutable="false"/>
        <virtualColumn name="hdesc" sourceColumn="hdesc" sourceTable="35-cc_1.to.202.txt/SHARED_ATTRS-org.cytoscape.model.CyNode-cc_1.to.202.txt+root+shared++node.cytable" sourceJoinKey="SUID" targetTable="51-51/LOCAL_ATTRS-org.cytoscape.model.CyNode-51+default+node.cytable" targetJoinKey="SUID" immutable="false"/>
        <virtualColumn name="hname" sourceColumn="hname" sourceTable="35-cc_1.to.202.txt/SHARED_ATTRS-org.cytoscape.model.CyNode-cc_1.to.202.txt+root+shared++node.cytable" sourceJoinKey="SUID" targetTable="51-51/LOCAL_ATTRS-org.cytoscape.model.CyNode-51+default+node.cytable" targetJoinKey="SUID" immutable="false"/>
        <virtualColumn name="Network" sourceColumn="Network" sourceTable="35-cc_1.to.202.txt/SHARED_ATTRS-org.cytoscape.model.CyNode-cc_1.to.202.txt+root+shared++node.cytable" sourceJoinKey="SUID" targetTable="51-51/LOCAL_ATTRS-org.cytoscape.model.CyNode-51+default+node.cytable" targetJoinKey="SUID" immutable="false"/>
        <virtualColumn name="Organism" sourceColumn="Organism" sourceTable="35-cc_1.to.202.txt/SHARED_ATTRS-org.cytoscape.model.CyNode-cc_1.to.202.txt+root+shared++node.cytable" sourceJoinKey="SUID" targetTable="51-51/LOCAL_ATTRS-org.cytoscape.model.CyNode-51+default+node.cytable" targetJoinKey="SUID" immutable="false"/>
        <virtualColumn name="PP_TE_Distance" sourceColumn="PP_TE_Distance" sourceTable="35-cc_1.to.202.txt/SHARED_ATTRS-org.cytoscape.model.CyNode-cc_1.to.202.txt+root+shared++node.cytable" sourceJoinKey="SUID" targetTable="51-51/LOCAL_ATTRS-org.cytoscape.model.CyNode-51+default+node.cytable" targetJoinKey="SUID" immutable="false"/>
        <virtualColumn name="PPSerial" sourceColumn="PPSerial" sourceTable="35-cc_1.to.202.txt/SHARED_ATTRS-org.cytoscape.model.CyNode-cc_1.to.202.txt+root+shared++node.cytable" sourceJoinKey="SUID" targetTable="51-51/LOCAL_ATTRS-org.cytoscape.model.CyNode-51+default+node.cytable" targetJoinKey="SUID" immutable="false"/>
        <virtualColumn name="Prodigalscore" sourceColumn="Prodigalscore" sourceTable="35-cc_1.to.202.txt/SHARED_ATTRS-org.cytoscape.model.CyNode-cc_1.to.202.txt+root+shared++node.cytable" sourceJoinKey="SUID" targetTable="51-51/LOCAL_ATTRS-org.cytoscape.model.CyNode-51+default+node.cytable" targetJoinKey="SUID" immutable="false"/>
        <virtualColumn name="SameStrand" sourceColumn="SameStrand" sourceTable="35-cc_1.to.202.txt/SHARED_ATTRS-org.cytoscape.model.CyNode-cc_1.to.202.txt+root+shared++node.cytable" sourceJoinKey="SUID" targetTable="51-51/LOCAL_ATTRS-org.cytoscape.model.CyNode-51+default+node.cytable" targetJoinKey="SUID" immutable="false"/>
        <virtualColumn name="Sequence" sourceColumn="Sequence" sourceTable="35-cc_1.to.202.txt/SHARED_ATTRS-org.cytoscape.model.CyNode-cc_1.to.202.txt+root+shared++node.cytable" sourceJoinKey="SUID" targetTable="51-51/LOCAL_ATTRS-org.cytoscape.model.CyNode-51+default+node.cytable" targetJoinKey="SUID" immutable="false"/>
        <virtualColumn name="signif" sourceColumn="signif" sourceTable="35-cc_1.to.202.txt/SHARED_ATTRS-org.cytoscape.model.CyNode-cc_1.to.202.txt+root+shared++node.cytable" sourceJoinKey="SUID" targetTable="51-51/LOCAL_ATTRS-org.cytoscape.model.CyNode-51+default+node.cytable" targetJoinKey="SUID" immutable="false"/>
        <virtualColumn name="shared name" sourceColumn="shared name" sourceTable="35-cc_1.to.202.txt/SHARED_ATTRS-org.cytoscape.model.CyEdge-cc_1.to.202.txt+root+shared++edge.cytable" sourceJoinKey="SUID" targetTable="61-cc_1.to.202.txt/LOCAL_ATTRS-org.cytoscape.model.CyEdge-cc_1.to.202.txt+default+edge.cytable" targetJoinKey="SUID" immutable="false"/>
        <virtualColumn name="shared interaction" sourceColumn="shared interaction" sourceTable="35-cc_1.to.202.txt/SHARED_ATTRS-org.cytoscape.model.CyEdge-cc_1.to.202.txt+root+shared++edge.cytable" sourceJoinKey="SUID" targetTable="61-cc_1.to.202.txt/LOCAL_ATTRS-org.cytoscape.model.CyEdge-cc_1.to.202.txt+default+edge.cytable" targetJoinKey="SUID" immutable="false"/>
        <virtualColumn name="HIT%ID" sourceColumn="HIT%ID" sourceTable="35-cc_1.to.202.txt/SHARED_ATTRS-org.cytoscape.model.CyEdge-cc_1.to.202.txt+root+shared++edge.cytable" sourceJoinKey="SUID" targetTable="61-cc_1.to.202.txt/LOCAL_ATTRS-org.cytoscape.model.CyEdge-cc_1.to.202.txt+default+edge.cytable" targetJoinKey="SUID" immutable="false"/>
        <virtualColumn name="SS%ID" sourceColumn="SS%ID" sourceTable="35-cc_1.to.202.txt/SHARED_ATTRS-org.cytoscape.model.CyEdge-cc_1.to.202.txt+root+shared++edge.cytable" sourceJoinKey="SUID" targetTable="61-cc_1.to.202.txt/LOCAL_ATTRS-org.cytoscape.model.CyEdge-cc_1.to.202.txt+default+edge.cytable" targetJoinKey="SUID" immutable="false"/>
        <virtualColumn name="EVALUE" sourceColumn="EVALUE" sourceTable="35-cc_1.to.202.txt/SHARED_ATTRS-org.cytoscape.model.CyEdge-cc_1.to.202.txt+root+shared++edge.cytable" sourceJoinKey="SUID" targetTable="61-cc_1.to.202.txt/LOCAL_ATTRS-org.cytoscape.model.CyEdge-cc_1.to.202.txt+default+edge.cytable" targetJoinKey="SUID" immutable="false"/>
        <virtualColumn name="MIN_COV_OPT" sourceColumn="MIN_COV_OPT" sourceTable="35-cc_1.to.202.txt/SHARED_ATTRS-org.cytoscape.model.CyEdge-cc_1.to.202.txt+root+shared++edge.cytable" sourceJoinKey="SUID" targetTable="61-cc_1.to.202.txt/LOCAL_ATTRS-org.cytoscape.model.CyEdge-cc_1.to.202.txt+default+edge.cytable" targetJoinKey="SUID" immutable="false"/>
        <virtualColumn name="shared name" sourceColumn="shared name" sourceTable="35-cc_1.to.202.txt/SHARED_ATTRS-org.cytoscape.model.CyNode-cc_1.to.202.txt+root+shared++node.cytable" sourceJoinKey="SUID" targetTable="61-cc_1.to.202.txt/LOCAL_ATTRS-org.cytoscape.model.CyNode-cc_1.to.202.txt+default+node.cytable" targetJoinKey="SUID" immutable="false"/>
        <virtualColumn name="Accession" sourceColumn="Accession" sourceTable="35-cc_1.to.202.txt/SHARED_ATTRS-org.cytoscape.model.CyNode-cc_1.to.202.txt+root+shared++node.cytable" sourceJoinKey="SUID" targetTable="61-cc_1.to.202.txt/LOCAL_ATTRS-org.cytoscape.model.CyNode-cc_1.to.202.txt+default+node.cytable" targetJoinKey="SUID" immutable="false"/>
        <virtualColumn name="Colour" sourceColumn="Colour" sourceTable="35-cc_1.to.202.txt/SHARED_ATTRS-org.cytoscape.model.CyNode-cc_1.to.202.txt+root+shared++node.cytable" sourceJoinKey="SUID" targetTable="61-cc_1.to.202.txt/LOCAL_ATTRS-org.cytoscape.model.CyNode-cc_1.to.202.txt+default+node.cytable" targetJoinKey="SUID" immutable="false"/>
        <virtualColumn name="Genus" sourceColumn="Genus" sourceTable="35-cc_1.to.202.txt/SHARED_ATTRS-org.cytoscape.model.CyNode-cc_1.to.202.txt+root+shared++node.cytable" sourceJoinKey="SUID" targetTable="61-cc_1.to.202.txt/LOCAL_ATTRS-org.cytoscape.model.CyNode-cc_1.to.202.txt+default+node.cytable" targetJoinKey="SUID" immutable="false"/>
        <virtualColumn name="hdesc" sourceColumn="hdesc" sourceTable="35-cc_1.to.202.txt/SHARED_ATTRS-org.cytoscape.model.CyNode-cc_1.to.202.txt+root+shared++node.cytable" sourceJoinKey="SUID" targetTable="61-cc_1.to.202.txt/LOCAL_ATTRS-org.cytoscape.model.CyNode-cc_1.to.202.txt+default+node.cytable" targetJoinKey="SUID" immutable="false"/>
        <virtualColumn name="hname" sourceColumn="hname" sourceTable="35-cc_1.to.202.txt/SHARED_ATTRS-org.cytoscape.model.CyNode-cc_1.to.202.txt+root+shared++node.cytable" sourceJoinKey="SUID" targetTable="61-cc_1.to.202.txt/LOCAL_ATTRS-org.cytoscape.model.CyNode-cc_1.to.202.txt+default+node.cytable" targetJoinKey="SUID" immutable="false"/>
        <virtualColumn name="Network" sourceColumn="Network" sourceTable="35-cc_1.to.202.txt/SHARED_ATTRS-org.cytoscape.model.CyNode-cc_1.to.202.txt+root+shared++node.cytable" sourceJoinKey="SUID" targetTable="61-cc_1.to.202.txt/LOCAL_ATTRS-org.cytoscape.model.CyNode-cc_1.to.202.txt+default+node.cytable" targetJoinKey="SUID" immutable="false"/>
        <virtualColumn name="Organism" sourceColumn="Organism" sourceTable="35-cc_1.to.202.txt/SHARED_ATTRS-org.cytoscape.model.CyNode-cc_1.to.202.txt+root+shared++node.cytable" sourceJoinKey="SUID" targetTable="61-cc_1.to.202.txt/LOCAL_ATTRS-org.cytoscape.model.CyNode-cc_1.to.202.txt+default+node.cytable" targetJoinKey="SUID" immutable="false"/>
        <virtualColumn name="PP_TE_Distance" sourceColumn="PP_TE_Distance" sourceTable="35-cc_1.to.202.txt/SHARED_ATTRS-org.cytoscape.model.CyNode-cc_1.to.202.txt+root+shared++node.cytable" sourceJoinKey="SUID" targetTable="61-cc_1.to.202.txt/LOCAL_ATTRS-org.cytoscape.model.CyNode-cc_1.to.202.txt+default+node.cytable" targetJoinKey="SUID" immutable="false"/>
        <virtualColumn name="PPSerial" sourceColumn="PPSerial" sourceTable="35-cc_1.to.202.txt/SHARED_ATTRS-org.cytoscape.model.CyNode-cc_1.to.202.txt+root+shared++node.cytable" sourceJoinKey="SUID" targetTable="61-cc_1.to.202.txt/LOCAL_ATTRS-org.cytoscape.model.CyNode-cc_1.to.202.txt+default+node.cytable" targetJoinKey="SUID" immutable="false"/>
        <virtualColumn name="Prodigalscore" sourceColumn="Prodigalscore" sourceTable="35-cc_1.to.202.txt/SHARED_ATTRS-org.cytoscape.model.CyNode-cc_1.to.202.txt+root+shared++node.cytable" sourceJoinKey="SUID" targetTable="61-cc_1.to.202.txt/LOCAL_ATTRS-org.cytoscape.model.CyNode-cc_1.to.202.txt+default+node.cytable" targetJoinKey="SUID" immutable="false"/>
        <virtualColumn name="SameStrand" sourceColumn="SameStrand" sourceTable="35-cc_1.to.202.txt/SHARED_ATTRS-org.cytoscape.model.CyNode-cc_1.to.202.txt+root+shared++node.cytable" sourceJoinKey="SUID" targetTable="61-cc_1.to.202.txt/LOCAL_ATTRS-org.cytoscape.model.CyNode-cc_1.to.202.txt+default+node.cytable" targetJoinKey="SUID" immutable="false"/>
        <virtualColumn name="Sequence" sourceColumn="Sequence" sourceTable="35-cc_1.to.202.txt/SHARED_ATTRS-org.cytoscape.model.CyNode-cc_1.to.202.txt+root+shared++node.cytable" sourceJoinKey="SUID" targetTable="61-cc_1.to.202.txt/LOCAL_ATTRS-org.cytoscape.model.CyNode-cc_1.to.202.txt+default+node.cytable" targetJoinKey="SUID" immutable="false"/>
        <virtualColumn name="signif" sourceColumn="signif" sourceTable="35-cc_1.to.202.txt/SHARED_ATTRS-org.cytoscape.model.CyNode-cc_1.to.202.txt+root+shared++node.cytable" sourceJoinKey="SUID" targetTable="61-cc_1.to.202.txt/LOCAL_ATTRS-org.cytoscape.model.CyNode-cc_1.to.202.txt+default+node.cytable" targetJoinKey="SUID" immutable="false"/>
        <virtualColumn name="shared name" sourceColumn="shared name" sourceTable="35-cc_1.to.202.txt/SHARED_ATTRS-org.cytoscape.model.CyNode-cc_1.to.202.txt+root+shared++node.cytable" sourceJoinKey="SUID" targetTable="35-cc_1.to.202.txt/LOCAL_ATTRS-org.cytoscape.model.CyNode-cc_1.to.202.txt+root+default++node.cytable" targetJoinKey="SUID" immutable="false"/>
        <virtualColumn name="Accession" sourceColumn="Accession" sourceTable="35-cc_1.to.202.txt/SHARED_ATTRS-org.cytoscape.model.CyNode-cc_1.to.202.txt+root+shared++node.cytable" sourceJoinKey="SUID" targetTable="35-cc_1.to.202.txt/LOCAL_ATTRS-org.cytoscape.model.CyNode-cc_1.to.202.txt+root+default++node.cytable" targetJoinKey="SUID" immutable="false"/>
        <virtualColumn name="Colour" sourceColumn="Colour" sourceTable="35-cc_1.to.202.txt/SHARED_ATTRS-org.cytoscape.model.CyNode-cc_1.to.202.txt+root+shared++node.cytable" sourceJoinKey="SUID" targetTable="35-cc_1.to.202.txt/LOCAL_ATTRS-org.cytoscape.model.CyNode-cc_1.to.202.txt+root+default++node.cytable" targetJoinKey="SUID" immutable="false"/>
        <virtualColumn name="Genus" sourceColumn="Genus" sourceTable="35-cc_1.to.202.txt/SHARED_ATTRS-org.cytoscape.model.CyNode-cc_1.to.202.txt+root+shared++node.cytable" sourceJoinKey="SUID" targetTable="35-cc_1.to.202.txt/LOCAL_ATTRS-org.cytoscape.model.CyNode-cc_1.to.202.txt+root+default++node.cytable" targetJoinKey="SUID" immutable="false"/>
        <virtualColumn name="hdesc" sourceColumn="hdesc" sourceTable="35-cc_1.to.202.txt/SHARED_ATTRS-org.cytoscape.model.CyNode-cc_1.to.202.txt+root+shared++node.cytable" sourceJoinKey="SUID" targetTable="35-cc_1.to.202.txt/LOCAL_ATTRS-org.cytoscape.model.CyNode-cc_1.to.202.txt+root+default++node.cytable" targetJoinKey="SUID" immutable="false"/>
        <virtualColumn name="hname" sourceColumn="hname" sourceTable="35-cc_1.to.202.txt/SHARED_ATTRS-org.cytoscape.model.CyNode-cc_1.to.202.txt+root+shared++node.cytable" sourceJoinKey="SUID" targetTable="35-cc_1.to.202.txt/LOCAL_ATTRS-org.cytoscape.model.CyNode-cc_1.to.202.txt+root+default++node.cytable" targetJoinKey="SUID" immutable="false"/>
        <virtualColumn name="Network" sourceColumn="Network" sourceTable="35-cc_1.to.202.txt/SHARED_ATTRS-org.cytoscape.model.CyNode-cc_1.to.202.txt+root+shared++node.cytable" sourceJoinKey="SUID" targetTable="35-cc_1.to.202.txt/LOCAL_ATTRS-org.cytoscape.model.CyNode-cc_1.to.202.txt+root+default++node.cytable" targetJoinKey="SUID" immutable="false"/>
        <virtualColumn name="Organism" sourceColumn="Organism" sourceTable="35-cc_1.to.202.txt/SHARED_ATTRS-org.cytoscape.model.CyNode-cc_1.to.202.txt+root+shared++node.cytable" sourceJoinKey="SUID" targetTable="35-cc_1.to.202.txt/LOCAL_ATTRS-org.cytoscape.model.CyNode-cc_1.to.202.txt+root+default++node.cytable" targetJoinKey="SUID" immutable="false"/>
        <virtualColumn name="PP_TE_Distance" sourceColumn="PP_TE_Distance" sourceTable="35-cc_1.to.202.txt/SHARED_ATTRS-org.cytoscape.model.CyNode-cc_1.to.202.txt+root+shared++node.cytable" sourceJoinKey="SUID" targetTable="35-cc_1.to.202.txt/LOCAL_ATTRS-org.cytoscape.model.CyNode-cc_1.to.202.txt+root+default++node.cytable" targetJoinKey="SUID" immutable="false"/>
        <virtualColumn name="PPSerial" sourceColumn="PPSerial" sourceTable="35-cc_1.to.202.txt/SHARED_ATTRS-org.cytoscape.model.CyNode-cc_1.to.202.txt+root+shared++node.cytable" sourceJoinKey="SUID" targetTable="35-cc_1.to.202.txt/LOCAL_ATTRS-org.cytoscape.model.CyNode-cc_1.to.202.txt+root+default++node.cytable" targetJoinKey="SUID" immutable="false"/>
        <virtualColumn name="Prodigalscore" sourceColumn="Prodigalscore" sourceTable="35-cc_1.to.202.txt/SHARED_ATTRS-org.cytoscape.model.CyNode-cc_1.to.202.txt+root+shared++node.cytable" sourceJoinKey="SUID" targetTable="35-cc_1.to.202.txt/LOCAL_ATTRS-org.cytoscape.model.CyNode-cc_1.to.202.txt+root+default++node.cytable" targetJoinKey="SUID" immutable="false"/>
        <virtualColumn name="SameStrand" sourceColumn="SameStrand" sourceTable="35-cc_1.to.202.txt/SHARED_ATTRS-org.cytoscape.model.CyNode-cc_1.to.202.txt+root+shared++node.cytable" sourceJoinKey="SUID" targetTable="35-cc_1.to.202.txt/LOCAL_ATTRS-org.cytoscape.model.CyNode-cc_1.to.202.txt+root+default++node.cytable" targetJoinKey="SUID" immutable="false"/>
        <virtualColumn name="Sequence" sourceColumn="Sequence" sourceTable="35-cc_1.to.202.txt/SHARED_ATTRS-org.cytoscape.model.CyNode-cc_1.to.202.txt+root+shared++node.cytable" sourceJoinKey="SUID" targetTable="35-cc_1.to.202.txt/LOCAL_ATTRS-org.cytoscape.model.CyNode-cc_1.to.202.txt+root+default++node.cytable" targetJoinKey="SUID" immutable="false"/>
        <virtualColumn name="signif" sourceColumn="signif" sourceTable="35-cc_1.to.202.txt/SHARED_ATTRS-org.cytoscape.model.CyNode-cc_1.to.202.txt+root+shared++node.cytable" sourceJoinKey="SUID" targetTable="35-cc_1.to.202.txt/LOCAL_ATTRS-org.cytoscape.model.CyNode-cc_1.to.202.txt+root+default++node.cytable" targetJoinKey="SUID" immutable="false"/>
        <virtualColumn name="shared name" sourceColumn="shared name" sourceTable="35-cc_1.to.202.txt/SHARED_ATTRS-org.cytoscape.model.CyEdge-cc_1.to.202.txt+root+shared++edge.cytable" sourceJoinKey="SUID" targetTable="51-51/LOCAL_ATTRS-org.cytoscape.model.CyEdge-51+default+edge.cytable" targetJoinKey="SUID" immutable="false"/>
        <virtualColumn name="shared interaction" sourceColumn="shared interaction" sourceTable="35-cc_1.to.202.txt/SHARED_ATTRS-org.cytoscape.model.CyEdge-cc_1.to.202.txt+root+shared++edge.cytable" sourceJoinKey="SUID" targetTable="51-51/LOCAL_ATTRS-org.cytoscape.model.CyEdge-51+default+edge.cytable" targetJoinKey="SUID" immutable="false"/>
        <virtualColumn name="HIT%ID" sourceColumn="HIT%ID" sourceTable="35-cc_1.to.202.txt/SHARED_ATTRS-org.cytoscape.model.CyEdge-cc_1.to.202.txt+root+shared++edge.cytable" sourceJoinKey="SUID" targetTable="51-51/LOCAL_ATTRS-org.cytoscape.model.CyEdge-51+default+edge.cytable" targetJoinKey="SUID" immutable="false"/>
        <virtualColumn name="SS%ID" sourceColumn="SS%ID" sourceTable="35-cc_1.to.202.txt/SHARED_ATTRS-org.cytoscape.model.CyEdge-cc_1.to.202.txt+root+shared++edge.cytable" sourceJoinKey="SUID" targetTable="51-51/LOCAL_ATTRS-org.cytoscape.model.CyEdge-51+default+edge.cytable" targetJoinKey="SUID" immutable="false"/>
        <virtualColumn name="EVALUE" sourceColumn="EVALUE" sourceTable="35-cc_1.to.202.txt/SHARED_ATTRS-org.cytoscape.model.CyEdge-cc_1.to.202.txt+root+shared++edge.cytable" sourceJoinKey="SUID" targetTable="51-51/LOCAL_ATTRS-org.cytoscape.model.CyEdge-51+default+edge.cytable" targetJoinKey="SUID" immutable="false"/>
        <virtualColumn name="MIN_COV_OPT" sourceColumn="MIN_COV_OPT" sourceTable="35-cc_1.to.202.txt/SHARED_ATTRS-org.cytoscape.model.CyEdge-cc_1.to.202.txt+root+shared++edge.cytable" sourceJoinKey="SUID" targetTable="51-51/LOCAL_ATTRS-org.cytoscape.model.CyEdge-51+default+edge.cytable" targetJoinKey="SUID" immutable="false"/>
        <virtualColumn name="shared name" sourceColumn="shared name" sourceTable="35-cc_1.to.202.txt/SHARED_ATTRS-org.cytoscape.model.CyNetwork-cc_1.to.202.txt+root+shared++network.cytable" sourceJoinKey="SUID" targetTable="61-cc_1.to.202.txt/LOCAL_ATTRS-org.cytoscape.model.CyNetwork-cc_1.to.202.txt+default+network.cytable" targetJoinKey="SUID" immutable="false"/>
    </virtualColumns>
</cyTables>
