# Supplementary material for: Understanding thioamitide biosynthesis using pathway engineering and untargeted metabolomics
Source: Royal Society of Chemistry journal article supplement (doi:10.1039/d0sc06835g), 2021-01-01
Supplement: d0sc06835g3.cys [file d0sc06835g3.cys › CytoscapeSession-2021_03_29-10_56/views/61-32257-cc_1.to.202.txt.xgmml]

<?xml version="1.0" encoding="UTF-8" standalone="yes"?>
<graph id="32257" label="32257" cy:view="1" cy:networkId="61" cy:visualStyle="Thioamitide paper" cy:rendererId="org.cytoscape.ding" cy:documentVersion="3.0" xmlns:dc="http://purl.org/dc/elements/1.1/" xmlns:xlink="http://www.w3.org/1999/xlink" xmlns:rdf="http://www.w3.org/1999/02/22-rdf-syntax-ns#" xmlns:cy="http://www.cytoscape.org" xmlns="http://www.cs.rpi.edu/XGMML">
  <graphics>
    <att name="NETWORK_CENTER_Y_LOCATION" value="476.320466890427" type="string" cy:type="String"/>
    <att name="NETWORK_CENTER_Z_LOCATION" value="0.0" type="string" cy:type="String"/>
    <att name="NETWORK_NODE_LABEL_SELECTION" value="false" type="string" cy:type="String"/>
    <att name="NETWORK_DEPTH" value="0.0" type="string" cy:type="String"/>
    <att name="NETWORK_CENTER_X_LOCATION" value="1196.4014069916188" type="string" cy:type="String"/>
    <att name="NETWORK_HEIGHT" value="935.0" type="string" cy:type="String"/>
    <att name="NETWORK_TITLE" value="" type="string" cy:type="String"/>
    <att name="NETWORK_SCALE_FACTOR" value="0.14404583462351514" type="string" cy:type="String"/>
    <att name="NETWORK_EDGE_SELECTION" value="true" type="string" cy:type="String"/>
    <att name="NETWORK_NODE_SELECTION" value="true" type="string" cy:type="String"/>
    <att name="NETWORK_WIDTH" value="1259.0" type="string" cy:type="String"/>
    <att name="NETWORK_ANNOTATION_SELECTION" value="false" type="string" cy:type="String"/>
    <att name="lockedVisualProperties" type="list" cy:type="List">
      <att name="NETWORK_FORCE_HIGH_DETAIL" value="false" type="string" cy:type="String"/>
    </att>
  </graphics>
  <node id="32872" label="WP_015210601_3" cy:nodeId="30720">
    <graphics x="856.7078688785775" z="0.0" y="763.1721908740303"/>
  </node>
  <node id="32864" label="RCJ30949_7" cy:nodeId="30752">
    <graphics x="588.9179061100228" z="0.0" y="862.1792747668526"/>
  </node>
  <node id="32552" label="WP_086837411_3" cy:nodeId="31776">
    <graphics x="-1757.1437970288605" z="0.0" y="2263.3633749558244"/>
  </node>
  <node id="33162" label="WP_096285992_3" cy:nodeId="12352">
    <graphics x="-1014.76792517231" z="0.0" y="-453.75033049027"/>
  </node>
  <node id="32536" label="WP_096537288_1" cy:nodeId="31808">
    <graphics x="-726.261314500174" z="0.0" y="2261.475313432387"/>
  </node>
  <node id="33937" label="WP_162399505_5" cy:nodeId="96">
    <graphics x="-530.1908498988771" z="0.0" y="-1280.7499808527243"/>
  </node>
  <node id="33564" label="WP_086689015_2" cy:nodeId="1120">
    <graphics x="-573.5506728348839" z="0.0" y="-1404.6707274255057"/>
  </node>
  <node id="33284" label="TVP63782_4" cy:nodeId="5216">
    <graphics x="-975.1835170934489" z="0.0" y="-1327.7920448818074"/>
  </node>
  <node id="33921" label="OBQ18754_2" cy:nodeId="128">
    <graphics x="-711.3852863763746" z="0.0" y="-1304.2536595549498"/>
  </node>
  <node id="33905" label="WP_096728455_2" cy:nodeId="160">
    <graphics x="-841.7066147047143" z="0.0" y="-1142.5779253399412"/>
  </node>
  <node id="33175" label="WP_096575011_1" cy:nodeId="11424">
    <graphics x="-1376.215341555566" z="0.0" y="-1594.854945777293"/>
  </node>
  <node id="32996" label="RCJ14929_5" cy:nodeId="29856">
    <graphics x="1621.160354826345" z="0.0" y="-1481.0005060445017"/>
  </node>
  <node id="32837" label="WP_053560627_1" cy:nodeId="30880">
    <graphics x="-1682.7357684164415" z="0.0" y="1111.9476483533072"/>
  </node>
  <node id="32487" label="WP_141936425_1" cy:nodeId="31904">
    <graphics x="-1586.835668671927" z="0.0" y="2440.8152105881486"/>
  </node>
  <node id="33889" label="WP_006195640_2" cy:nodeId="192">
    <graphics x="-722.9821296528385" z="0.0" y="-1222.782669856231"/>
  </node>
  <node id="32470" label="WP_051837683_2" cy:nodeId="31936">
    <graphics x="-421.2303753980011" z="0.0" y="2479.6266729904924"/>
  </node>
  <node id="33873" label="OBQ36138_3" cy:nodeId="224">
    <graphics x="-367.05362479845587" z="0.0" y="-1384.5591351143846"/>
  </node>
  <node id="32428" label="WP_015207767_2" cy:nodeId="32000">
    <graphics x="1742.1361216417938" z="0.0" y="2440.8152105881486"/>
  </node>
  <node id="33842" label="WP_012597836_5" cy:nodeId="288">
    <graphics x="-948.7891781145288" z="0.0" y="-1225.9459386000124"/>
  </node>
  <node id="32805" label="WP_058047489_3" cy:nodeId="31008">
    <graphics x="1987.2517027138542" z="0.0" y="667.1145685215212"/>
  </node>
  <node id="32407" label="WP_016898474_2" cy:nodeId="32032">
    <graphics x="-1380.6674977429718" z="0.0" y="2808.985773332289"/>
  </node>
  <node id="33534" label="WP_044206131_2" cy:nodeId="1344">
    <graphics x="-1057.5971774283387" z="0.0" y="-1253.0846380227774"/>
  </node>
  <node id="32799" label="WP_061955677_5" cy:nodeId="31040">
    <graphics x="-1274.3965436108917" z="0.0" y="1242.3404200150285"/>
  </node>
  <node id="32364" label="WP_096604516_2" cy:nodeId="32096">
    <graphics x="785.7164515368133" z="0.0" y="2701.263605363539"/>
  </node>
  <node id="32343" label="WP_015113151_5" cy:nodeId="32128">
    <graphics x="1915.8909739367157" z="0.0" y="2808.985773332289"/>
  </node>
  <node id="32781" label="OBQ36138_2" cy:nodeId="31136">
    <graphics x="-1030.299636371033" z="0.0" y="1265.6775871566108"/>
  </node>
  <node id="33335" label="WP_167717694_4" cy:nodeId="3520">
    <graphics x="-924.2205202509347" z="0.0" y="-1158.124091417954"/>
  </node>
  <node id="32774" label="WP_015078657_9" cy:nodeId="31168">
    <graphics x="-977.1894068788455" z="0.0" y="1285.9507652571967"/>
  </node>
  <node id="32300" label="WP_145385118_2" cy:nodeId="32192">
    <graphics x="-141.44061862309877" z="0.0" y="2908.985773332289"/>
  </node>
  <node id="32279" label="WP_045869173_3" cy:nodeId="32224">
    <graphics x="988.7339037768036" z="0.0" y="3016.707941301039"/>
  </node>
  <node id="33397" label="WP_096681247_3" cy:nodeId="2560">
    <graphics x="-653.8284313308243" z="0.0" y="-1227.9066084039112"/>
  </node>
  <node id="33333" label="WP_127086205_6" cy:nodeId="3616">
    <graphics x="-1089.34932105444" z="0.0" y="-1175.3143178928474"/>
  </node>
  <node id="32935" label="BBD66616_5" cy:nodeId="30240">
    <graphics x="-1659.3044807361102" z="0.0" y="679.9883484360964"/>
  </node>
  <node id="33717" label="WP_051837683_3" cy:nodeId="576">
    <graphics x="-1077.637559669057" z="0.0" y="-179.87532867500593"/>
  </node>
  <node id="33330" label="WP_127086205_1" cy:nodeId="3648">
    <graphics x="-1088.06822553926" z="0.0" y="-1116.1264688192348"/>
  </node>
  <node id="33392" label="BAZ29283_2" cy:nodeId="2656">
    <graphics x="-721.3745462541988" z="0.0" y="-1155.7305647216451"/>
  </node>
  <node id="32731" label="WP_139627778_3" cy:nodeId="31328">
    <graphics x="1329.1871013685427" z="0.0" y="1292.6306044655742"/>
  </node>
  <node id="32709" label="WP_095720237_2" cy:nodeId="31392">
    <graphics x="2298.7276010515175" z="0.0" y="1255.5547643388297"/>
  </node>
  <node id="32917" label="WP_096547181_5" cy:nodeId="30400">
    <graphics x="-264.29278724935216" z="0.0" y="614.2021019152901"/>
  </node>
  <node id="32699" label="WP_067652746_2" cy:nodeId="31424">
    <graphics x="733.9396459961782" z="0.0" y="1632.3409695180867"/>
  </node>
  <node id="33169" label="WP_016950446_2" cy:nodeId="12000">
    <graphics x="-767.5339440019156" z="0.0" y="-1172.172522988072"/>
  </node>
  <node id="33101" label="WP_073619367_1" cy:nodeId="28416">
    <graphics x="494.67407247771257" z="0.0" y="-1481.0005060445017"/>
  </node>
  <node id="33032" label="WP_012409787_8" cy:nodeId="29440">
    <graphics x="1263.5425226425061" z="0.0" y="-1403.6383234273142"/>
  </node>
  <node id="32676" label="WP_051418997_2" cy:nodeId="31488">
    <graphics x="-0.617621077434876" z="0.0" y="1672.6065871315893"/>
  </node>
  <node id="33469" label="WP_009079852_1" cy:nodeId="1824">
    <graphics x="-831.8638020785519" z="0.0" y="-314.05959754103117"/>
  </node>
  <node id="33085" label="WP_017315790_1" cy:nodeId="28448">
    <graphics x="482.0098039840602" z="0.0" y="-1373.861162782783"/>
  </node>
  <node id="33016" label="AVH79662_1" cy:nodeId="29472">
    <graphics x="1356.70571539153" z="0.0" y="-1372.3634592305368"/>
  </node>
  <node id="33631" label="WP_006513161_2" cy:nodeId="864">
    <graphics x="-829.6879445430521" z="0.0" y="-1034.1815046249137"/>
  </node>
  <node id="33618" label="BBD63560_3" cy:nodeId="896">
    <graphics x="-906.8128029972711" z="0.0" y="-1073.5229616127506"/>
  </node>
  <node id="32625" label="WP_086835908_9006" cy:nodeId="31616">
    <graphics x="-131.31918974823003" z="0.0" y="1971.4514826656791"/>
  </node>
  <node id="33605" label="WP_015197629_1" cy:nodeId="928">
    <graphics x="-1023.4720179534331" z="0.0" y="-1230.305801248545"/>
  </node>
  <node id="33313" label="WP_102939117_1" cy:nodeId="4097">
    <graphics x="-980.787983229179" z="0.0" y="-1344.5461394299816"/>
  </node>
  <node id="33583" label="WP_128433866_2" cy:nodeId="1057">
    <graphics x="-809.4331338457641" z="0.0" y="-151.0507857390683"/>
  </node>
  <node id="33228" label="WP_124271963_1" cy:nodeId="7201">
    <graphics x="-763.3085056887587" z="0.0" y="-349.7937769637563"/>
  </node>
  <node id="32518" label="WP_172358022_2" cy:nodeId="31841">
    <graphics x="355.8550026863945" z="0.0" y="2003.2587345167567"/>
  </node>
  <node id="33223" label="WP_166282462_1" cy:nodeId="7297">
    <graphics x="-1095.5183342063394" z="0.0" y="-1065.7692978818266"/>
  </node>
  <node id="33547" label="AOX46105_2" cy:nodeId="1185">
    <graphics x="-934.2120419469072" z="0.0" y="-35.77135827529722"/>
  </node>
  <node id="33305" label="WP_017585895_3" cy:nodeId="4257">
    <graphics x="-647.3505547393224" z="0.0" y="-279.4844538063395"/>
  </node>
  <node id="32486" label="WP_084890433_1" cy:nodeId="31905">
    <graphics x="-1516.855978120169" z="0.0" y="2523.848535783461"/>
  </node>
  <node id="32816" label="WP_052479947_3" cy:nodeId="30945">
    <graphics x="2452.0613860376243" z="0.0" y="682.4927175391185"/>
  </node>
  <node id="32449" label="RCJ31639_1" cy:nodeId="31969">
    <graphics x="708.9441470019012" z="0.0" y="2548.5373785568986"/>
  </node>
  <node id="33857" label="WP_027402982_8" cy:nodeId="257">
    <graphics x="-337.6676248900179" z="0.0" y="-1366.7044561050895"/>
  </node>
  <node id="33537" label="AVH79535_8" cy:nodeId="1313">
    <graphics x="-1289.1511399797457" z="0.0" y="-1322.9051184090965"/>
  </node>
  <node id="32983" label="WP_097866484_2" cy:nodeId="29985">
    <graphics x="2085.3963949339022" z="0.0" y="-1320.2943612068946"/>
  </node>
  <node id="32406" label="WP_030061393_3" cy:nodeId="32033">
    <graphics x="-1377.6500455029816" z="0.0" y="2701.263605363539"/>
  </node>
  <node id="33826" label="WP_006197379_2" cy:nodeId="321">
    <graphics x="-873.6580737146713" z="0.0" y="-1287.2558799087599"/>
  </node>
  <node id="32971" label="WP_125506282_1" cy:nodeId="30017">
    <graphics x="2152.135103429996" z="0.0" y="-1248.1898015469367"/>
  </node>
  <node id="32385" label="WP_124970176_10" cy:nodeId="32065">
    <graphics x="-247.47552310307924" z="0.0" y="2808.985773332289"/>
  </node>
  <node id="33811" label="WP_106240815_3" cy:nodeId="353">
    <graphics x="-882.0335100474466" z="0.0" y="-1073.3766959987295"/>
  </node>
  <node id="33796" label="WP_015207767_1" cy:nodeId="385">
    <graphics x="-826.0006007286424" z="0.0" y="-1113.0554813296365"/>
  </node>
  <node id="33410" label="WP_104291723_2" cy:nodeId="2433">
    <graphics x="-1072.0574434924285" z="0.0" y="-350.31403931635464"/>
  </node>
  <node id="33197" label="WP_096589596_3" cy:nodeId="8577">
    <graphics x="-1053.5403084947318" z="0.0" y="-1237.0620385771797"/>
  </node>
  <node id="32342" label="WP_096575011_8" cy:nodeId="32129">
    <graphics x="1918.908426176706" z="0.0" y="2701.263605363539"/>
  </node>
  <node id="33788" label="WP_106289349_2" cy:nodeId="417">
    <graphics x="-893.8871242011363" z="0.0" y="-1133.3578036648285"/>
  </node>
  <node id="32967" label="WP_157857956_2" cy:nodeId="30113">
    <graphics x="2200.169511999332" z="0.0" y="-1357.0817197293097"/>
  </node>
  <node id="32321" label="WP_010996620_3" cy:nodeId="32161">
    <graphics x="-1174.6325932629913" z="0.0" y="3016.707941301039"/>
  </node>
  <node id="33771" label="WP_051708270_1" cy:nodeId="449">
    <graphics x="-1146.7879148550799" z="0.0" y="-116.62066757263418"/>
  </node>
  <node id="33755" label="WP_051700182_2" cy:nodeId="481">
    <graphics x="-1153.2369584661444" z="0.0" y="-58.400548862095576"/>
  </node>
  <node id="32956" label="WP_015212417_5" cy:nodeId="30177">
    <graphics x="-676.6647206433624" z="0.0" y="688.3122446610246"/>
  </node>
  <node id="32278" label="WP_073591536_7" cy:nodeId="32225">
    <graphics x="991.7513560167938" z="0.0" y="2908.985773332289"/>
  </node>
  <node id="33207" label="WP_096730381_4" cy:nodeId="7681">
    <graphics x="-568.0935093227592" z="0.0" y="-1447.9318174502293"/>
  </node>
  <node id="33725" label="WP_093619522_3" cy:nodeId="545">
    <graphics x="-1101.8968788925793" z="0.0" y="-124.3816736785582"/>
  </node>
  <node id="33052" label="WP_168643398_3" cy:nodeId="29249">
    <graphics x="719.9763147567653" z="0.0" y="-1389.4703704129404"/>
  </node>
  <node id="33707" label="WP_069073064_4" cy:nodeId="609">
    <graphics x="-799.4268860412699" z="0.0" y="-1268.6423751089785"/>
  </node>
  <node id="33045" label="WP_103138325_7" cy:nodeId="29281">
    <graphics x="723.8185693954372" z="0.0" y="-1471.6398377429193"/>
  </node>
  <node id="32730" label="WP_128433866_3" cy:nodeId="31329">
    <graphics x="1296.4960918470583" z="0.0" y="1183.2331626015607"/>
  </node>
  <node id="33697" label="TAE59458_1" cy:nodeId="641">
    <graphics x="-753.6321204229894" z="0.0" y="-1306.9700509942666"/>
  </node>
  <node id="33690" label="WP_099068319_6" cy:nodeId="673">
    <graphics x="-862.7127180177184" z="0.0" y="-1198.9031585494702"/>
  </node>
  <node id="33679" label="WP_069073064_7" cy:nodeId="705">
    <graphics x="-656.097867708216" z="0.0" y="-1228.5931257810623"/>
  </node>
  <node id="33379" label="WP_086820173_3" cy:nodeId="2753">
    <graphics x="-1060.4478019414762" z="0.0" y="283.3440274462058"/>
  </node>
  <node id="33670" label="WP_096589596_4" cy:nodeId="737">
    <graphics x="-867.163036979763" z="0.0" y="-1427.930658668996"/>
  </node>
  <node id="32687" label="WP_042619690_6" cy:nodeId="31457">
    <graphics x="-587.3919618732489" z="0.0" y="1565.7147542941102"/>
  </node>
  <node id="32675" label="WP_157857956_3" cy:nodeId="31489">
    <graphics x="58.70330177412757" z="0.0" y="1586.4056899147924"/>
  </node>
  <node id="32662" label="WP_099071810_5" cy:nodeId="31521">
    <graphics x="-1346.6520202733439" z="0.0" y="1681.1211925233388"/>
  </node>
  <node id="33640" label="WP_159688203_1" cy:nodeId="833">
    <graphics x="-945.9064144692609" z="0.0" y="-182.7130153768001"/>
  </node>
  <node id="33454" label="WP_167721203_8" cy:nodeId="1953">
    <graphics x="-860.3772458898883" z="0.0" y="-1400.4677696239849"/>
  </node>
  <node id="32598" label="BAZ15600_1" cy:nodeId="31681">
    <graphics x="1188.1657729969916" z="0.0" y="1531.758854342248"/>
  </node>
  <node id="32584" label="TCK41348_1" cy:nodeId="31713">
    <graphics x="-897.3464135233796" z="0.0" y="2541.8263599612505"/>
  </node>
  <node id="32871" label="WP_168357543_2" cy:nodeId="30722">
    <graphics x="917.5182860538705" z="0.0" y="570.2214653186104"/>
  </node>
  <node id="32568" label="WP_164394909_2" cy:nodeId="31746">
    <graphics x="1529.404146367601" z="0.0" y="1912.6283082428022"/>
  </node>
  <node id="33582" label="WP_153461219_4" cy:nodeId="1058">
    <graphics x="-874.6319833012175" z="0.0" y="-132.98467923529714"/>
  </node>
  <node id="32863" label="RCJ30949_8" cy:nodeId="30754">
    <graphics x="1042.8265956089242" z="0.0" y="598.7245628527901"/>
  </node>
  <node id="32551" label="WP_138498765_3" cy:nodeId="31778">
    <graphics x="-1686.835668671927" z="0.0" y="2181.642549760512"/>
  </node>
  <node id="33569" label="WP_083744359_2" cy:nodeId="1090">
    <graphics x="-896.2557647247094" z="0.0" y="-237.84412136194322"/>
  </node>
  <node id="33936" label="WP_026100063_2" cy:nodeId="98">
    <graphics x="-741.2118030831039" z="0.0" y="-1325.3175479744275"/>
  </node>
  <node id="33920" label="WP_015212417_2" cy:nodeId="130">
    <graphics x="-752.645387528551" z="0.0" y="-1256.3296068586822"/>
  </node>
  <node id="33557" label="WP_017314970_4" cy:nodeId="1154">
    <graphics x="-812.0621899179819" z="0.0" y="-1185.5723938240733"/>
  </node>
  <node id="33435" label="WP_096576757_1" cy:nodeId="2178">
    <graphics x="-923.5317139592069" z="0.0" y="-1054.2807502098328"/>
  </node>
  <node id="32502" label="WP_097866484_3" cy:nodeId="31874">
    <graphics x="1741.5664671770721" z="0.0" y="2161.6212484909806"/>
  </node>
  <node id="33904" label="WP_168645325_1" cy:nodeId="162">
    <graphics x="-610.6853369875164" z="0.0" y="-1200.8155421521112"/>
  </node>
  <node id="33428" label="WP_015193424_4" cy:nodeId="2210">
    <graphics x="-1030.8567020278708" z="0.0" y="-1202.694910777809"/>
  </node>
  <node id="33174" label="WP_015157989_1" cy:nodeId="11426">
    <graphics x="-1010.6526181730721" z="0.0" y="-1428.7102853942959"/>
  </node>
  <node id="33122" label="WP_167407701_3" cy:nodeId="22690">
    <graphics x="-836.491358061291" z="0.0" y="-1423.2395192848815"/>
  </node>
  <node id="32836" label="WP_128433866_1" cy:nodeId="30882">
    <graphics x="-1616.442944624938" z="0.0" y="1240.3215192029165"/>
  </node>
  <node id="33888" label="WP_168465654_1" cy:nodeId="194">
    <graphics x="-636.9709852649532" z="0.0" y="-1266.8696933015196"/>
  </node>
  <node id="32828" label="WP_015659226_5" cy:nodeId="30914">
    <graphics x="-1725.428746321715" z="0.0" y="1354.33415348026"/>
  </node>
  <node id="33872" label="WP_114082527_7" cy:nodeId="226">
    <graphics x="-465.3383050806873" z="0.0" y="-1125.42416397385"/>
  </node>
  <node id="32990" label="WP_096569967_7" cy:nodeId="29922">
    <graphics x="1769.0088770126242" z="0.0" y="-1396.8749567280954"/>
  </node>
  <node id="32448" label="WP_087542717_6" cy:nodeId="31970">
    <graphics x="711.9615992418915" z="0.0" y="2440.8152105881486"/>
  </node>
  <node id="32427" label="WP_102116354_1" cy:nodeId="32002">
    <graphics x="1842.1361216417938" z="0.0" y="2548.5373785568986"/>
  </node>
  <node id="33841" label="WP_015216084_10" cy:nodeId="290">
    <graphics x="-897.2909493563046" z="0.0" y="-1288.6906227691977"/>
  </node>
  <node id="33278" label="WP_103811802_2" cy:nodeId="5410">
    <graphics x="-739.8898001191785" z="0.0" y="134.37840706042462"/>
  </node>
  <node id="33251" label="WP_167721203_6" cy:nodeId="6434">
    <graphics x="-1009.6989579631179" z="0.0" y="-1314.5668323579773"/>
  </node>
  <node id="32384" label="OGQ08743_4" cy:nodeId="32066">
    <graphics x="-244.458070863089" z="0.0" y="2701.263605363539"/>
  </node>
  <node id="33342" label="WP_142936832_2" cy:nodeId="3426">
    <graphics x="-1047.3152231404317" z="0.0" y="-391.47919979048925"/>
  </node>
  <node id="32969" label="WP_093908736_2" cy:nodeId="30050">
    <graphics x="2114.901216711246" z="0.0" y="-1393.338315340882"/>
  </node>
  <node id="32363" label="PSB62113_1" cy:nodeId="32098">
    <graphics x="885.7164515368133" z="0.0" y="2808.985773332289"/>
  </node>
  <node id="33152" label="WP_130475988_1" cy:nodeId="14722">
    <graphics x="-625.4506186626613" z="0.0" y="-349.6412321782325"/>
  </node>
  <node id="32780" label="OBQ18754_4" cy:nodeId="31138">
    <graphics x="-927.4100794862674" z="0.0" y="1158.9478203109077"/>
  </node>
  <node id="32320" label="WP_096680266_2" cy:nodeId="32162">
    <graphics x="-1171.6151410230011" z="0.0" y="2908.985773332289"/>
  </node>
  <node id="33520" label="WP_012409362_5" cy:nodeId="1474">
    <graphics x="-769.285933759907" z="0.0" y="-1157.4807241183187"/>
  </node>
  <node id="32299" label="WP_051857755_3" cy:nodeId="32194">
    <graphics x="-41.44061862309877" z="0.0" y="3016.707941301039"/>
  </node>
  <node id="33513" label="TVP62740_4" cy:nodeId="1506">
    <graphics x="-398.19553723619845" z="0.0" y="-1303.8174773148091"/>
  </node>
  <node id="33245" label="WP_051715083_4" cy:nodeId="6690">
    <graphics x="-810.9392297461791" z="0.0" y="209.46390992443722"/>
  </node>
  <node id="32934" label="AVH79607_6" cy:nodeId="30242">
    <graphics x="-1735.6292640613055" z="0.0" y="664.060507249573"/>
  </node>
  <node id="32746" label="OBQ18754_1" cy:nodeId="31266">
    <graphics x="847.8732649358515" z="0.0" y="1225.0596919740224"/>
  </node>
  <node id="33292" label="WP_089091039_7" cy:nodeId="4770">
    <graphics x="-417.92250992436254" z="0.0" y="-1132.4116160157316"/>
  </node>
  <node id="32926" label="WP_103138325_9" cy:nodeId="30370">
    <graphics x="-1766.793936912868" z="0.0" y="599.8570160386355"/>
  </node>
  <node id="32916" label="WP_102695456_1" cy:nodeId="30402">
    <graphics x="-253.34214943196935" z="0.0" y="663.8493797473213"/>
  </node>
  <node id="32698" label="WP_062451377_1" cy:nodeId="31426">
    <graphics x="816.5839636231314" z="0.0" y="1640.4618114980672"/>
  </node>
  <node id="33477" label="WP_015127932_2" cy:nodeId="1762">
    <graphics x="-660.6703473604571" z="0.0" y="-1146.4136748308263"/>
  </node>
  <node id="33100" label="WP_062294404_2" cy:nodeId="28418">
    <graphics x="539.7882463668727" z="0.0" y="-1376.6926447163767"/>
  </node>
  <node id="33031" label="TVP63782_1" cy:nodeId="29442">
    <graphics x="1385.898800108327" z="0.0" y="-1466.8402429829782"/>
  </node>
  <node id="33651" label="WP_127078868_1" cy:nodeId="802">
    <graphics x="-934.3608488286543" z="0.0" y="-1340.8788970838248"/>
  </node>
  <node id="33468" label="WP_141310912_1" cy:nodeId="1826">
    <graphics x="-898.121772985346" z="0.0" y="-343.9140442517589"/>
  </node>
  <node id="33084" label="WP_010996620_1" cy:nodeId="28450">
    <graphics x="392.20107290495866" z="0.0" y="-1392.2315851460642"/>
  </node>
  <node id="32652" label="WP_062437448_5" cy:nodeId="31554">
    <graphics x="-1018.5644205483826" z="0.0" y="1680.6179341173427"/>
  </node>
  <node id="33630" label="WP_099068319_2" cy:nodeId="866">
    <graphics x="-911.7095944555174" z="0.0" y="-1196.6966488728829"/>
  </node>
  <node id="32896" label="WP_018962004_1" cy:nodeId="30562">
    <graphics x="74.22444755289393" z="0.0" y="811.761397569587"/>
  </node>
  <node id="33369" label="WP_127931424_1" cy:nodeId="2946">
    <graphics x="-1252.3840186114774" z="0.0" y="-171.81891580953996"/>
  </node>
  <node id="33118" label="WP_070396421_4" cy:nodeId="23426">
    <graphics x="-1225.8330461263251" z="0.0" y="-1143.8066871022054"/>
  </node>
  <node id="32624" label="WP_086835908_9007" cy:nodeId="31618">
    <graphics x="-18.10224410003656" z="0.0" y="1905.8683680416557"/>
  </node>
  <node id="33604" label="WP_053455886_2" cy:nodeId="930">
    <graphics x="-970.4697543917271" z="0.0" y="-1171.080336655799"/>
  </node>
  <node id="32597" label="WP_096620836_2" cy:nodeId="31682">
    <graphics x="1199.4125991688666" z="0.0" y="1640.1649345882197"/>
  </node>
  <node id="32567" label="WP_052808529_2" cy:nodeId="31747">
    <graphics x="1546.046220952562" z="0.0" y="2019.1153687896772"/>
  </node>
  <node id="32535" label="AVH79628_7" cy:nodeId="31811">
    <graphics x="-494.0398560651154" z="0.0" y="2247.844827897719"/>
  </node>
  <node id="32840" label="WP_071383933_4" cy:nodeId="30851">
    <graphics x="1295.7258518831136" z="0.0" y="802.8797580327506"/>
  </node>
  <node id="32501" label="WP_107115831_2" cy:nodeId="31875">
    <graphics x="1848.3267878405243" z="0.0" y="2176.368379838637"/>
  </node>
  <node id="33546" label="WP_062071413_1" cy:nodeId="1187">
    <graphics x="-1127.7472287260114" z="0.0" y="-404.52210400454965"/>
  </node>
  <node id="33304" label="WP_017585895_2" cy:nodeId="4259">
    <graphics x="-650.1899041473744" z="0.0" y="-248.26770172795537"/>
  </node>
  <node id="32485" label="WP_030169499_1" cy:nodeId="31907">
    <graphics x="-1441.769521821341" z="0.0" y="2601.263605363539"/>
  </node>
  <node id="32469" label="WP_068150862_4" cy:nodeId="31939">
    <graphics x="-321.2303753980011" z="0.0" y="2548.5373785568986"/>
  </node>
  <node id="33420" label="WP_008178764_1" cy:nodeId="2275">
    <graphics x="-892.3628689844326" z="0.0" y="-1034.8912153108574"/>
  </node>
  <node id="33856" label="WP_038089561_4" cy:nodeId="259">
    <graphics x="-590.6469513934273" z="0.0" y="-1296.2344401669286"/>
  </node>
  <node id="32426" label="WP_110163988_1" cy:nodeId="32003">
    <graphics x="1845.153573881784" z="0.0" y="2440.8152105881486"/>
  </node>
  <node id="32982" label="WP_126393842_2" cy:nodeId="29987">
    <graphics x="2127.059633459293" z="0.0" y="-1342.2195580929572"/>
  </node>
  <node id="32804" label="WP_051840194_4" cy:nodeId="31011">
    <graphics x="2000.1137480019402" z="0.0" y="551.2099054355837"/>
  </node>
  <node id="32405" label="WP_026723183_3" cy:nodeId="32035">
    <graphics x="-1277.6500455029816" z="0.0" y="2808.985773332289"/>
  </node>
  <node id="33825" label="WP_096689510_2" cy:nodeId="323">
    <graphics x="-967.0699175135512" z="0.0" y="-1166.4587353930872"/>
  </node>
  <node id="32798" label="WP_104291723_5" cy:nodeId="31043">
    <graphics x="-1168.8533536084503" z="0.0" y="1216.4469645096574"/>
  </node>
  <node id="33810" label="WP_096689510_6" cy:nodeId="355">
    <graphics x="-914.0676156807738" z="0.0" y="-1246.046625774721"/>
  </node>
  <node id="32792" label="WP_166841243_3" cy:nodeId="31075">
    <graphics x="-1358.708215821585" z="0.0" y="1213.9222223831925"/>
  </node>
  <node id="32362" label="WP_083782609_1" cy:nodeId="32099">
    <graphics x="888.7339037768036" z="0.0" y="2701.263605363539"/>
  </node>
  <node id="33795" label="WP_096537472_3" cy:nodeId="387">
    <graphics x="-893.6288405668155" z="0.0" y="-1214.131520241808"/>
  </node>
  <node id="33409" label="WP_091465037_1" cy:nodeId="2435">
    <graphics x="-959.4044964749708" z="0.0" y="-403.49684285125727"/>
  </node>
  <node id="32341" label="WP_127078868_2" cy:nodeId="32131">
    <graphics x="2018.908426176706" z="0.0" y="2808.985773332289"/>
  </node>
  <node id="33787" label="WP_138689268_3" cy:nodeId="419">
    <graphics x="-854.423055166343" z="0.0" y="24.338207422778765"/>
  </node>
  <node id="32779" label="WP_168357543_3" cy:nodeId="31139">
    <graphics x="-905.1392054628299" z="0.0" y="1210.4755913070014"/>
  </node>
  <node id="33770" label="WP_051837683_4" cy:nodeId="451">
    <graphics x="-1135.5497349723244" z="0.0" y="1.054180391738015"/>
  </node>
  <node id="32298" label="WP_121024930_2" cy:nodeId="32195">
    <graphics x="-38.42316638310854" z="0.0" y="2908.985773332289"/>
  </node>
  <node id="33754" label="WP_052680420_2" cy:nodeId="483">
    <graphics x="-1110.0224248389366" z="0.0" y="-13.73799164468673"/>
  </node>
  <node id="33210" label="WP_015155263_4" cy:nodeId="7651">
    <graphics x="-652.9439048674242" z="0.0" y="-1542.3030760772706"/>
  </node>
  <node id="32766" label="WP_155862233_6" cy:nodeId="31203">
    <graphics x="-389.7772732861847" z="0.0" y="1322.7724475039754"/>
  </node>
  <node id="32277" label="WP_096576751_2" cy:nodeId="32227">
    <graphics x="1091.7513560167938" z="0.0" y="3016.707941301039"/>
  </node>
  <node id="32946" label="WP_015210601_4" cy:nodeId="30211">
    <graphics x="-1310.6168385632843" z="0.0" y="725.2274820877824"/>
  </node>
  <node id="33051" label="WP_104899482_1" cy:nodeId="29251">
    <graphics x="723.3109094833278" z="0.0" y="-1294.7936965237802"/>
  </node>
  <node id="32729" label="WP_051851944_2" cy:nodeId="31331">
    <graphics x="1259.6716594740114" z="0.0" y="1054.378231723875"/>
  </node>
  <node id="32719" label="WP_148763415_7" cy:nodeId="31363">
    <graphics x="971.551284564466" z="0.0" y="1209.5767697191493"/>
  </node>
  <node id="32708" label="TAE58797_2" cy:nodeId="31395">
    <graphics x="2386.954209327885" z="0.0" y="1184.221500941613"/>
  </node>
  <node id="33678" label="WP_006195640_8" cy:nodeId="707">
    <graphics x="-786.4586582131737" z="0.0" y="-1310.5023442538402"/>
  </node>
  <node id="33378" label="WP_051707308_3" cy:nodeId="2755">
    <graphics x="-733.7968456310566" z="0.0" y="51.887699662905476"/>
  </node>
  <node id="33168" label="WP_017749323_3" cy:nodeId="12003">
    <graphics x="-739.9324155046775" z="0.0" y="-1098.7809116430178"/>
  </node>
  <node id="32674" label="WP_106331017_5" cy:nodeId="31491">
    <graphics x="-51.4847170247005" z="0.0" y="1575.2475173073706"/>
  </node>
  <node id="32638" label="BAZ86949_1" cy:nodeId="31587">
    <graphics x="2335.8202586472207" z="0.0" y="1610.1066470826652"/>
  </node>
  <node id="33617" label="WP_015189896_3" cy:nodeId="899">
    <graphics x="-816.5388856111963" z="0.0" y="-1146.1364871961011"/>
  </node>
  <node id="33012" label="WP_103138325_1" cy:nodeId="29603">
    <graphics x="1264.768810484303" z="0.0" y="-1431.9787012349313"/>
  </node>
  <node id="33261" label="WP_026100063_1" cy:nodeId="6148">
    <graphics x="-755.0112908845472" z="0.0" y="-1164.099765167706"/>
  </node>
  <node id="32870" label="WP_137906310_6" cy:nodeId="30724">
    <graphics x="766.9068282291635" z="0.0" y="741.5996582202217"/>
  </node>
  <node id="33443" label="WP_019501955_4" cy:nodeId="2084">
    <graphics x="-1036.1609413264953" z="0.0" y="-1331.9412456915195"/>
  </node>
  <node id="33193" label="WP_089126833_1" cy:nodeId="9284">
    <graphics x="-1079.8789169311347" z="0.0" y="-1547.2947636037313"/>
  </node>
  <node id="32534" label="WP_096679519_6" cy:nodeId="31812">
    <graphics x="-560.0946351178497" z="0.0" y="2161.6212484909806"/>
  </node>
  <node id="33935" label="CEJ45116_2" cy:nodeId="100">
    <graphics x="-788.2272956365773" z="0.0" y="-1205.140347673925"/>
  </node>
  <node id="32850" label="WP_060892878_2" cy:nodeId="30820">
    <graphics x="1280.611227859676" z="0.0" y="722.1566135015006"/>
  </node>
  <node id="32517" label="WP_042619690_1" cy:nodeId="31844">
    <graphics x="715.6841162554413" z="0.0" y="2161.6212484909806"/>
  </node>
  <node id="33919" label="WP_011321056_1" cy:nodeId="132">
    <graphics x="-655.2835990172746" z="0.0" y="-1255.8256988187384"/>
  </node>
  <node id="33357" label="WP_167717694_2" cy:nodeId="3204">
    <graphics x="-985.916852941066" z="0.0" y="-1056.3271577494631"/>
  </node>
  <node id="33903" label="WP_096681247_5" cy:nodeId="164">
    <graphics x="-633.2039331097906" z="0.0" y="-1237.8112029005604"/>
  </node>
  <node id="32835" label="WP_136238412_1" cy:nodeId="30884">
    <graphics x="-1675.5494433431998" z="0.0" y="1187.4980023572132"/>
  </node>
  <node id="33887" label="WP_073644071_5" cy:nodeId="196">
    <graphics x="-717.3732253045014" z="0.0" y="-1282.857847157942"/>
  </node>
  <node id="32468" label="WP_068099584_4" cy:nodeId="31940">
    <graphics x="-318.2129231580109" z="0.0" y="2440.8152105881486"/>
  </node>
  <node id="33871" label="WP_015078657_10" cy:nodeId="228">
    <graphics x="-437.59210827780714" z="0.0" y="-1278.05588829135"/>
  </node>
  <node id="32447" label="WP_110256027_1" cy:nodeId="31972">
    <graphics x="811.9615992418915" z="0.0" y="2548.5373785568986"/>
  </node>
  <node id="33840" label="WP_096580419_1" cy:nodeId="292">
    <graphics x="-933.3276637975639" z="0.0" y="-1161.9855888402851"/>
  </node>
  <node id="32404" label="AYJ47579_1" cy:nodeId="32036">
    <graphics x="-1274.6325932629913" z="0.0" y="2701.263605363539"/>
  </node>
  <node id="33347" label="WP_062295185_5" cy:nodeId="3396">
    <graphics x="-826.2522942411301" z="0.0" y="-1224.6736250562424"/>
  </node>
  <node id="32383" label="WP_169264746_2" cy:nodeId="32068">
    <graphics x="-144.458070863089" z="0.0" y="2808.985773332289"/>
  </node>
  <node id="32340" label="WP_019495762_2" cy:nodeId="32132">
    <graphics x="2021.9258784166962" z="0.0" y="2701.263605363539"/>
  </node>
  <node id="33786" label="WP_138666048_2" cy:nodeId="420">
    <graphics x="-1020.6444048618075" z="0.0" y="-201.80467759122877"/>
  </node>
  <node id="32319" label="BAU44627_2" cy:nodeId="32164">
    <graphics x="-1071.6151410230011" z="0.0" y="3016.707941301039"/>
  </node>
  <node id="33403" label="WP_015127932_3" cy:nodeId="2500">
    <graphics x="-674.5968707324641" z="0.0" y="-1316.6473528530512"/>
  </node>
  <node id="33402" label="WP_016864763_2" cy:nodeId="2532">
    <graphics x="-1122.1868788221911" z="0.0" y="-1450.0390930319734"/>
  </node>
  <node id="32276" label="WP_096576757_2" cy:nodeId="32228">
    <graphics x="1094.768808256784" z="0.0" y="2908.985773332289"/>
  </node>
  <node id="33739" label="WP_052269673_2" cy:nodeId="516">
    <graphics x="-658.8735125888134" z="0.0" y="58.904747562389645"/>
  </node>
  <node id="33244" label="WP_095933898_2" cy:nodeId="6692">
    <graphics x="-803.3090317090036" z="0.0" y="108.34745353654708"/>
  </node>
  <node id="33243" label="AVH79628_4" cy:nodeId="6788">
    <graphics x="-1104.623842217174" z="0.0" y="-1346.9207595853547"/>
  </node>
  <node id="32718" label="WP_168645325_7" cy:nodeId="31364">
    <graphics x="976.9647575745291" z="0.0" y="1142.747836003329"/>
  </node>
  <node id="33689" label="WP_137906310_1" cy:nodeId="676">
    <graphics x="-695.4037992579683" z="0.0" y="-1160.1781156779214"/>
  </node>
  <node id="33326" label="AOX46105_3" cy:nodeId="3748">
    <graphics x="-1001.1156655923339" z="0.0" y="92.17700933067809"/>
  </node>
  <node id="32915" label="WP_027975917_4" cy:nodeId="30404">
    <graphics x="-295.23770302083653" z="0.0" y="681.1317894152901"/>
  </node>
  <node id="33669" label="WP_167721203_3" cy:nodeId="740">
    <graphics x="-1026.8113740053661" z="0.0" y="-1369.5150507214892"/>
  </node>
  <node id="32910" label="WP_068208510_2" cy:nodeId="30436">
    <graphics x="-212.82916420247716" z="0.0" y="708.9463798693916"/>
  </node>
  <node id="33656" label="BAZ42602_1" cy:nodeId="772">
    <graphics x="-853.7609083702836" z="0.0" y="-1195.071295380785"/>
  </node>
  <node id="33123" label="AFY52807_1" cy:nodeId="22276">
    <graphics x="-1011.4388597759814" z="0.0" y="-973.1139255657502"/>
  </node>
  <node id="33099" label="WP_095720237_1" cy:nodeId="28420">
    <graphics x="380.85785696257585" z="0.0" y="-1372.4921137105173"/>
  </node>
  <node id="33030" label="WP_086760950_1" cy:nodeId="29444">
    <graphics x="1227.5003168319597" z="0.0" y="-1421.3218256245798"/>
  </node>
  <node id="33650" label="WP_096688632_1" cy:nodeId="804">
    <graphics x="-1026.1713955502776" z="0.0" y="-1233.0453951690176"/>
  </node>
  <node id="33467" label="WP_058047489_1" cy:nodeId="1828">
    <graphics x="-839.3135132156539" z="0.0" y="-250.37326574538625"/>
  </node>
  <node id="33083" label="WP_169219905_1" cy:nodeId="28452">
    <graphics x="538.1126215194606" z="0.0" y="-1401.8420282612985"/>
  </node>
  <node id="33629" label="WP_096688632_2" cy:nodeId="868">
    <graphics x="-877.8795151351068" z="0.0" y="-1331.926403768786"/>
  </node>
  <node id="32637" label="WP_168646604_1" cy:nodeId="31588">
    <graphics x="2463.8640971481973" z="0.0" y="1636.7042270387199"/>
  </node>
  <node id="33164" label="WP_017581465_4" cy:nodeId="12164">
    <graphics x="-544.3823360438921" z="0.0" y="-156.1636838438342"/>
  </node>
  <node id="32623" label="WP_086835908_9004" cy:nodeId="31620">
    <graphics x="-107.4429347128295" z="0.0" y="1882.121862304351"/>
  </node>
  <node id="33603" label="WP_027843178_1" cy:nodeId="932">
    <graphics x="-817.2733562259523" z="0.0" y="-1145.1246481284213"/>
  </node>
  <node id="33232" label="WP_019499235_1" cy:nodeId="7076">
    <graphics x="-945.7681141484343" z="0.0" y="-1102.8753993047465"/>
  </node>
  <node id="32610" label="WP_053002257_1" cy:nodeId="31652">
    <graphics x="1060.5383442722339" z="0.0" y="1591.2279871210371"/>
  </node>
  <node id="33450" label="WP_017198207_5" cy:nodeId="1988">
    <graphics x="-1195.6062407424558" z="0.0" y="62.99099073095695"/>
  </node>
  <node id="32596" label="RCJ34841_2" cy:nodeId="31684">
    <graphics x="1286.5643783436713" z="0.0" y="1578.840776873376"/>
  </node>
  <node id="32583" label="WP_109006830_1" cy:nodeId="31716">
    <graphics x="463.0719433437331" z="0.0" y="2157.9340582126506"/>
  </node>
  <node id="32566" label="WP_049976882_3" cy:nodeId="31749">
    <graphics x="1629.9625799003159" z="0.0" y="1951.439770645146"/>
  </node>
  <node id="33581" label="WP_139627778_2" cy:nodeId="1061">
    <graphics x="-723.6374582878427" z="0.0" y="-118.06049430368037"/>
  </node>
  <node id="33227" label="WP_107115831_1" cy:nodeId="7205">
    <graphics x="-733.885865562502" z="0.0" y="-283.9777681042675"/>
  </node>
  <node id="32550" label="WP_118166682_3" cy:nodeId="31781">
    <graphics x="-1586.835668671927" z="0.0" y="2161.6212484909806"/>
  </node>
  <node id="33568" label="WP_030169499_4" cy:nodeId="1093">
    <graphics x="-860.3238326560466" z="0.0" y="-158.5418747902502"/>
  </node>
  <node id="33563" label="BAY08128_1" cy:nodeId="1125">
    <graphics x="-784.4451309051651" z="0.0" y="-1210.452276351123"/>
  </node>
  <node id="32849" label="WP_141720451_4" cy:nodeId="30821">
    <graphics x="1364.6645115510823" z="0.0" y="778.11446872611"/>
  </node>
  <node id="32516" label="WP_067652746_1" cy:nodeId="31845">
    <graphics x="751.2776259295135" z="0.0" y="2263.3633749558244"/>
  </node>
  <node id="32500" label="WP_096622718_3" cy:nodeId="31877">
    <graphics x="1782.1601084582" z="0.0" y="2261.475313432387"/>
  </node>
  <node id="33427" label="WP_015189896_1" cy:nodeId="2213">
    <graphics x="-824.8866541640305" z="0.0" y="-1309.3623292179143"/>
  </node>
  <node id="32484" label="WP_116195863_2" cy:nodeId="31909">
    <graphics x="-1341.769521821341" z="0.0" y="2440.8152105881486"/>
  </node>
  <node id="32446" label="WP_162060722_2" cy:nodeId="31973">
    <graphics x="814.9790514818817" z="0.0" y="2440.8152105881486"/>
  </node>
  <node id="33855" label="OBQ18754_3" cy:nodeId="261">
    <graphics x="-419.4361775868159" z="0.0" y="-1410.5136756379104"/>
  </node>
  <node id="32425" label="WP_075895564_1" cy:nodeId="32005">
    <graphics x="1945.153573881784" z="0.0" y="2548.5373785568986"/>
  </node>
  <node id="33277" label="WP_087811088_2" cy:nodeId="5413">
    <graphics x="-824.3907373060583" z="0.0" y="76.68365996822232"/>
  </node>
  <node id="32981" label="WP_141310912_2" cy:nodeId="29989">
    <graphics x="2150.421282018863" z="0.0" y="-1382.903111788636"/>
  </node>
  <node id="33824" label="WP_138499827_1" cy:nodeId="325">
    <graphics x="-958.2489167237934" z="0.0" y="-1115.2160643908026"/>
  </node>
  <node id="32382" label="WP_169264744_2" cy:nodeId="32069">
    <graphics x="-141.44061862309877" z="0.0" y="2701.263605363539"/>
  </node>
  <node id="33809" label="WP_017314970_1" cy:nodeId="357">
    <graphics x="-812.2884047031689" z="0.0" y="-1244.8544864083121"/>
  </node>
  <node id="33418" label="WP_015216084_12" cy:nodeId="2405">
    <graphics x="-1196.846866682725" z="0.0" y="-1326.483251057001"/>
  </node>
  <node id="32361" label="SNT25203_5" cy:nodeId="32101">
    <graphics x="988.7339037768036" z="0.0" y="2808.985773332289"/>
  </node>
  <node id="33408" label="WP_103138325_4" cy:nodeId="2437">
    <graphics x="-961.8210510730557" z="0.0" y="-1553.2831226489104"/>
  </node>
  <node id="32318" label="WP_172358022_1" cy:nodeId="32165">
    <graphics x="-1068.5976887830109" z="0.0" y="2908.985773332289"/>
  </node>
  <node id="33769" label="WP_079191916_2" cy:nodeId="453">
    <graphics x="-1092.4600754514333" z="0.0" y="-212.4547940969121"/>
  </node>
  <node id="32297" label="WP_015140719_2" cy:nodeId="32197">
    <graphics x="61.57683361689146" z="0.0" y="3016.707941301039"/>
  </node>
  <node id="33753" label="WP_055704502_2" cy:nodeId="485">
    <graphics x="-918.7791812545263" z="0.0" y="-178.5689666709284"/>
  </node>
  <node id="33512" label="TAG67909_1" cy:nodeId="1509">
    <graphics x="-944.121352834655" z="0.0" y="-1189.7444615320017"/>
  </node>
  <node id="32955" label="BAZ29283_6" cy:nodeId="30181">
    <graphics x="-1370.514970887503" z="0.0" y="624.5673868729386"/>
  </node>
  <node id="33738" label="WP_136238412_3" cy:nodeId="517">
    <graphics x="-780.4495161585157" z="0.0" y="-160.16280305325088"/>
  </node>
  <node id="33505" label="WP_138498533_3" cy:nodeId="1541">
    <graphics x="-964.3555163252447" z="0.0" y="-1265.7936983123252"/>
  </node>
  <node id="32758" label="WP_053706403_4" cy:nodeId="31237">
    <graphics x="327.30677212397154" z="0.0" y="1349.5880472733293"/>
  </node>
  <node id="33329" label="WP_104899482_4" cy:nodeId="3653">
    <graphics x="-918.2055004281854" z="0.0" y="-1340.422539753741"/>
  </node>
  <node id="33295" label="WP_084890433_4" cy:nodeId="4677">
    <graphics x="-895.000766775477" z="0.0" y="-36.27279654800671"/>
  </node>
  <node id="33050" label="WP_106371152_2" cy:nodeId="29253">
    <graphics x="832.0205805038356" z="0.0" y="-1294.9641219388193"/>
  </node>
  <node id="32728" label="WP_053560627_2" cy:nodeId="31333">
    <graphics x="1366.8114910169802" z="0.0" y="1394.7969939309062"/>
  </node>
  <node id="33377" label="WP_109003510_2" cy:nodeId="2757">
    <graphics x="-919.2402230981327" z="0.0" y="317.2551696045862"/>
  </node>
  <node id="33167" label="WP_096689510_3" cy:nodeId="12005">
    <graphics x="-919.2699358014786" z="0.0" y="-1123.4112709618237"/>
  </node>
  <node id="32673" label="WP_093908736_5" cy:nodeId="31493">
    <graphics x="108.47188697920548" z="0.0" y="1683.7773024636206"/>
  </node>
  <node id="33204" label="RCJ14929_4" cy:nodeId="8005">
    <graphics x="-706.5241597419076" z="0.0" y="-1148.2780903333512"/>
  </node>
  <node id="33237" label="WP_044206131_1" cy:nodeId="7013">
    <graphics x="-1092.2822842145977" z="0.0" y="-1266.0232905285845"/>
  </node>
  <node id="33616" label="WP_068385845_4" cy:nodeId="901">
    <graphics x="-880.5542798809755" z="0.0" y="-1229.8612930395936"/>
  </node>
  <node id="32609" label="WP_052752730_1" cy:nodeId="31653">
    <graphics x="934.0395191989918" z="0.0" y="1624.5772302850996"/>
  </node>
  <node id="32582" label="WP_118166682_2" cy:nodeId="31717">
    <graphics x="569.8322640071852" z="0.0" y="2172.681189560307"/>
  </node>
  <node id="33591" label="AFY52807_3" cy:nodeId="1030">
    <graphics x="-957.38852685099" z="0.0" y="-976.7730149867887"/>
  </node>
  <node id="32869" label="WP_168357543_4" cy:nodeId="30726">
    <graphics x="867.7415297672494" z="0.0" y="867.1389610461495"/>
  </node>
  <node id="32549" label="WP_109006830_3" cy:nodeId="31782">
    <graphics x="-1480.0753480084747" z="0.0" y="2176.368379838637"/>
  </node>
  <node id="32533" label="AVH79662_5" cy:nodeId="31814">
    <graphics x="-439.5280762799591" z="0.0" y="2340.8152105881486"/>
  </node>
  <node id="33934" label="WP_062295185_1" cy:nodeId="102">
    <graphics x="-752.8648799588259" z="0.0" y="-1169.1465823622018"/>
  </node>
  <node id="33308" label="WP_099700413_3" cy:nodeId="4198">
    <graphics x="-897.3270790481755" z="0.0" y="-965.1359939581771"/>
  </node>
  <node id="33918" label="WP_069073064_6" cy:nodeId="134">
    <graphics x="-813.3501514396917" z="0.0" y="-1210.9116624066553"/>
  </node>
  <node id="33434" label="WP_096576751_1" cy:nodeId="2182">
    <graphics x="-959.8388045979361" z="0.0" y="-1005.918801439711"/>
  </node>
  <node id="33902" label="WP_069073064_5" cy:nodeId="166">
    <graphics x="-627.4311870087688" z="0.0" y="-1183.9402874836412"/>
  </node>
  <node id="33545" label="AFR27446_2" cy:nodeId="1190">
    <graphics x="-1037.9707832755164" z="0.0" y="-499.11346007898715"/>
  </node>
  <node id="33303" label="QKI29067_1" cy:nodeId="4262">
    <graphics x="-895.7360680910868" z="0.0" y="-192.9801739490129"/>
  </node>
  <node id="33191" label="WP_055533290_1" cy:nodeId="9382">
    <graphics x="-664.871379260404" z="0.0" y="-459.5903188178552"/>
  </node>
  <node id="32995" label="WP_016950446_4" cy:nodeId="29862">
    <graphics x="1682.052345487966" z="0.0" y="-1451.113604189033"/>
  </node>
  <node id="32834" label="WP_051851944_1" cy:nodeId="30886">
    <graphics x="-1733.1874285726915" z="0.0" y="1225.0698712536973"/>
  </node>
  <node id="32483" label="WP_045296661_2" cy:nodeId="31910">
    <graphics x="-1325.12744723638" z="0.0" y="2547.3022711350236"/>
  </node>
  <node id="33886" label="WP_096559014_8" cy:nodeId="198">
    <graphics x="-777.0569885773289" z="0.0" y="-1238.4782135900057"/>
  </node>
  <node id="33422" label="WP_167717694_3" cy:nodeId="2246">
    <graphics x="-853.174360323609" z="0.0" y="-1034.3653371913422"/>
  </node>
  <node id="32827" label="WP_139627778_1" cy:nodeId="30918">
    <graphics x="-1601.1405955343616" z="0.0" y="1172.1645367810413"/>
  </node>
  <node id="32467" label="WP_086820178_2" cy:nodeId="31942">
    <graphics x="-218.21292315801088" z="0.0" y="2548.5373785568986"/>
  </node>
  <node id="33870" label="WP_137906310_5" cy:nodeId="230">
    <graphics x="-307.9688574956666" z="0.0" y="-1341.259841648647"/>
  </node>
  <node id="33352" label="WP_114082527_4" cy:nodeId="3334">
    <graphics x="-653.2395311861467" z="0.0" y="-1210.4187714368052"/>
  </node>
  <node id="32424" label="BAZ30575_2" cy:nodeId="32006">
    <graphics x="1948.1710261217743" z="0.0" y="2440.8152105881486"/>
  </node>
  <node id="33839" label="WP_012597836_4" cy:nodeId="294">
    <graphics x="-920.471255741925" z="0.0" y="-1139.3279473192122"/>
  </node>
  <node id="32403" label="WP_096576751_3" cy:nodeId="32038">
    <graphics x="-1174.6325932629913" z="0.0" y="2808.985773332289"/>
  </node>
  <node id="32797" label="WP_168688294_1" cy:nodeId="31046">
    <graphics x="-1273.3922139294953" z="0.0" y="1306.4840930475507"/>
  </node>
  <node id="33341" label="WP_168688294_2" cy:nodeId="3430">
    <graphics x="-982.031813558039" z="0.0" y="-467.34273052871026"/>
  </node>
  <node id="32360" label="AWS47415_4" cy:nodeId="32102">
    <graphics x="991.7513560167938" z="0.0" y="2701.263605363539"/>
  </node>
  <node id="32339" label="WP_012409362_1" cy:nodeId="32134">
    <graphics x="2121.925878416696" z="0.0" y="2808.985773332289"/>
  </node>
  <node id="33785" label="WP_052856102_3" cy:nodeId="422">
    <graphics x="-1005.7845056132871" z="0.0" y="-92.31020763374411"/>
  </node>
  <node id="32778" label="WP_137906310_4" cy:nodeId="31142">
    <graphics x="-925.5153346132205" z="0.0" y="1263.6114250472358"/>
  </node>
  <node id="33135" label="WP_086820178_3" cy:nodeId="17862">
    <graphics x="-970.763739065261" z="0.0" y="385.2616677509809"/>
  </node>
  <node id="32296" label="WP_096681247_1" cy:nodeId="32198">
    <graphics x="64.5942858568817" z="0.0" y="2908.985773332289"/>
  </node>
  <node id="32954" label="WP_069073064_3" cy:nodeId="30182">
    <graphics x="-1418.4317799695343" z="0.0" y="522.9646036698136"/>
  </node>
  <node id="32275" label="WP_150881471_1" cy:nodeId="32230">
    <graphics x="1194.768808256784" z="0.0" y="3016.707941301039"/>
  </node>
  <node id="32945" label="WP_124970176_5" cy:nodeId="30214">
    <graphics x="-1798.850432579372" z="0.0" y="656.9186005112917"/>
  </node>
  <node id="32757" label="WP_051708270_3" cy:nodeId="31238">
    <graphics x="252.32261074701842" z="0.0" y="1267.0712931229386"/>
  </node>
  <node id="32933" label="AVH79662_6" cy:nodeId="30246">
    <graphics x="-1678.837409202907" z="0.0" y="703.2769073960574"/>
  </node>
  <node id="33716" label="WP_130878496_2" cy:nodeId="582">
    <graphics x="-957.5539909646839" z="0.0" y="-61.066770185053"/>
  </node>
  <node id="33491" label="WP_155349848_1" cy:nodeId="1606">
    <graphics x="-537.622557695687" z="0.0" y="-89.85812593732274"/>
  </node>
  <node id="33486" label="WP_017581465_1" cy:nodeId="1638">
    <graphics x="-522.914331583562" z="0.0" y="-200.7504983790921"/>
  </node>
  <node id="33391" label="WP_015207763_3" cy:nodeId="2662">
    <graphics x="-974.1158369948087" z="0.0" y="-985.277232661919"/>
  </node>
  <node id="33195" label="WP_019496925_2" cy:nodeId="8806">
    <graphics x="-1010.3588338109246" z="0.0" y="-1379.8948952107055"/>
  </node>
  <node id="32717" label="WP_027402982_9" cy:nodeId="31366">
    <graphics x="1038.0845447907157" z="0.0" y="1112.4769619798915"/>
  </node>
  <node id="33688" label="WP_104387267_1" cy:nodeId="678">
    <graphics x="-685.3936678697642" z="0.0" y="-1232.4606589427747"/>
  </node>
  <node id="33039" label="TCN71580_2" cy:nodeId="29350">
    <graphics x="977.5445368026633" z="0.0" y="-1381.2029143582529"/>
  </node>
  <node id="33270" label="WP_017318973_1" cy:nodeId="5830">
    <graphics x="-929.1006619725656" z="0.0" y="-1326.6653946066688"/>
  </node>
  <node id="32914" label="EES41370_3" cy:nodeId="30406">
    <graphics x="-332.59100502278966" z="0.0" y="676.3515617541573"/>
  </node>
  <node id="33668" label="AVH79628_3" cy:nodeId="742">
    <graphics x="-905.9200619584578" z="0.0" y="-1394.6546282970992"/>
  </node>
  <node id="33098" label="WP_096583741_1" cy:nodeId="28422">
    <graphics x="467.9276430343532" z="0.0" y="-1297.1225763570017"/>
  </node>
  <node id="33029" label="WP_012595952_1" cy:nodeId="29446">
    <graphics x="1271.3334772323499" z="0.0" y="-1434.2504144917673"/>
  </node>
  <node id="33649" label="WP_052808529_1" cy:nodeId="806">
    <graphics x="-1035.4654407623682" z="0.0" y="-29.17521635137976"/>
  </node>
  <node id="33160" label="WP_049802506_1" cy:nodeId="13094">
    <graphics x="-881.6649833824766" z="0.0" y="-1069.959226462193"/>
  </node>
  <node id="33082" label="WP_162399305_2" cy:nodeId="28454">
    <graphics x="433.7535173629665" z="0.0" y="-1285.8618646870798"/>
  </node>
  <node id="33639" label="WP_068150862_2" cy:nodeId="838">
    <graphics x="-875.2865761565271" z="0.0" y="3.5294000833759185"/>
  </node>
  <node id="32907" label="WP_017595611_9003" cy:nodeId="30534">
    <graphics x="17.68450004312831" z="0.0" y="787.7757408313057"/>
  </node>
  <node id="33628" label="WP_015197629_3" cy:nodeId="870">
    <graphics x="-954.6957939837291" z="0.0" y="-1219.1084213672036"/>
  </node>
  <node id="33315" label="WP_016864763_1" cy:nodeId="3942">
    <graphics x="-1040.706122891482" z="0.0" y="-1380.3951531046366"/>
  </node>
  <node id="32636" label="WP_027403439_1" cy:nodeId="31590">
    <graphics x="2413.2049632370645" z="0.0" y="1559.3511386598136"/>
  </node>
  <node id="33072" label="WP_027840959_1" cy:nodeId="28550">
    <graphics x="430.659157011404" z="0.0" y="-1469.5370355855173"/>
  </node>
  <node id="33010" label="AVH79456_2" cy:nodeId="29670">
    <graphics x="1312.41028997649" z="0.0" y="-1317.8435655842966"/>
  </node>
  <node id="33590" label="AFY52807_4" cy:nodeId="1031">
    <graphics x="-1083.590204091073" z="0.0" y="-789.0106767641437"/>
  </node>
  <node id="33950" label="WP_162399505_1" cy:nodeId="71">
    <graphics x="-722.5176848729893" z="0.0" y="-1286.3964752800127"/>
  </node>
  <node id="32853" label="WP_129202808_1" cy:nodeId="30791">
    <graphics x="1508.7725352174893" z="0.0" y="762.1998104788051"/>
  </node>
  <node id="32848" label="WP_104258544_3" cy:nodeId="30823">
    <graphics x="1189.3936375276448" z="0.0" y="632.6849032964225"/>
  </node>
  <node id="32515" label="WP_112963677_1" cy:nodeId="31847">
    <graphics x="821.5857542864471" z="0.0" y="2181.642549760512"/>
  </node>
  <node id="33143" label="WP_079189213_1" cy:nodeId="15495">
    <graphics x="-1143.2457084360883" z="0.0" y="-122.59634260598139"/>
  </node>
  <node id="33008" label="WP_096681247_10" cy:nodeId="29831">
    <graphics x="1660.6663462852378" z="0.0" y="-1235.2939020405954"/>
  </node>
  <node id="32466" label="WP_086820173_2" cy:nodeId="31943">
    <graphics x="-215.19547091802065" z="0.0" y="2440.8152105881486"/>
  </node>
  <node id="32445" label="WP_052752730_2" cy:nodeId="31975">
    <graphics x="914.9790514818817" z="0.0" y="2548.5373785568986"/>
  </node>
  <node id="33854" label="WP_168357543_5" cy:nodeId="263">
    <graphics x="-308.05539304189676" z="0.0" y="-1246.8217466753156"/>
  </node>
  <node id="33254" label="WP_073644071_6" cy:nodeId="6407">
    <graphics x="-671.3458186677594" z="0.0" y="-1268.1959777136979"/>
  </node>
  <node id="32980" label="WP_051840194_5" cy:nodeId="29991">
    <graphics x="2046.2346059934728" z="0.0" y="-1384.0730870693976"/>
  </node>
  <node id="32402" label="WP_096576757_3" cy:nodeId="32039">
    <graphics x="-1171.6151410230011" z="0.0" y="2701.263605363539"/>
  </node>
  <node id="33823" label="WP_002735885_4" cy:nodeId="327">
    <graphics x="-990.3897158000898" z="0.0" y="-1222.0013777385645"/>
  </node>
  <node id="33533" label="AVH79607_5" cy:nodeId="1351">
    <graphics x="-1070.171799299045" z="0.0" y="-1264.1063497160974"/>
  </node>
  <node id="32381" label="WP_096547181_1" cy:nodeId="32071">
    <graphics x="-41.44061862309877" z="0.0" y="2808.985773332289"/>
  </node>
  <node id="33808" label="WP_066371470_6" cy:nodeId="359">
    <graphics x="-483.1867771747284" z="0.0" y="-140.5150038383206"/>
  </node>
  <node id="32338" label="WP_114082527_1" cy:nodeId="32135">
    <graphics x="2124.943330656686" z="0.0" y="2701.263605363539"/>
  </node>
  <node id="32317" label="KQP70226_1" cy:nodeId="32167">
    <graphics x="-968.5976887830109" z="0.0" y="3016.707941301039"/>
  </node>
  <node id="33768" label="WP_107777750_1" cy:nodeId="455">
    <graphics x="-974.109725217241" z="0.0" y="-48.40805179111206"/>
  </node>
  <node id="33752" label="WP_130878496_1" cy:nodeId="487">
    <graphics x="-1001.7040349085808" z="0.0" y="-148.62808021592244"/>
  </node>
  <node id="32274" label="WP_138989358_1" cy:nodeId="32231">
    <graphics x="1197.7862604967743" z="0.0" y="2908.985773332289"/>
  </node>
  <node id="33737" label="WP_019501955_13" cy:nodeId="519">
    <graphics x="-1416.3655484309713" z="0.0" y="-1324.5898210518242"/>
  </node>
  <node id="32944" label="WP_087592205_7" cy:nodeId="30215">
    <graphics x="-1741.8871910022235" z="0.0" y="626.7263397691042"/>
  </node>
  <node id="33328" label="WP_096589596_8" cy:nodeId="3655">
    <graphics x="-842.6635875399505" z="0.0" y="-1256.9761107711417"/>
  </node>
  <node id="32727" label="WP_109497443_1" cy:nodeId="31335">
    <graphics x="1338.9817485853396" z="0.0" y="1099.4914671975077"/>
  </node>
  <node id="33041" label="WP_073643028_1" cy:nodeId="29319">
    <graphics x="711.5009729598903" z="0.0" y="-1191.7418166409677"/>
  </node>
  <node id="33038" label="CNF13542_3" cy:nodeId="29351">
    <graphics x="1097.0272943710222" z="0.0" y="-1329.989421011085"/>
  </node>
  <node id="33677" label="WP_062295185_4" cy:nodeId="711">
    <graphics x="-682.3448794121209" z="0.0" y="-1207.4595290157192"/>
  </node>
  <node id="33376" label="WP_069887141_1" cy:nodeId="2759">
    <graphics x="-981.6372612536591" z="0.0" y="276.328022261879"/>
  </node>
  <node id="32697" label="WP_111838980_1" cy:nodeId="31431">
    <graphics x="731.3297521973501" z="0.0" y="1550.282738164327"/>
  </node>
  <node id="33476" label="WP_012409362_7" cy:nodeId="1767">
    <graphics x="-688.7196594559641" z="0.0" y="-1207.460022103525"/>
  </node>
  <node id="33655" label="WP_017318973_3" cy:nodeId="775">
    <graphics x="-792.0490801203118" z="0.0" y="-1080.3771004480839"/>
  </node>
  <node id="33466" label="WP_051418997_1" cy:nodeId="1831">
    <graphics x="-850.565732709504" z="0.0" y="-436.30925461100446"/>
  </node>
  <node id="32906" label="WP_129307706_1" cy:nodeId="30535">
    <graphics x="44.98686820719081" z="0.0" y="704.5581657580635"/>
  </node>
  <node id="32651" label="WP_170198719_3" cy:nodeId="31559">
    <graphics x="-1761.6349539529326" z="0.0" y="1621.0930164023127"/>
  </node>
  <node id="33615" label="WP_169219633_1" cy:nodeId="903">
    <graphics x="-860.1349636071526" z="0.0" y="-1207.0686159720242"/>
  </node>
  <node id="33602" label="WP_017748579_1" cy:nodeId="935">
    <graphics x="-860.4872055682634" z="0.0" y="-1278.6454444063309"/>
  </node>
  <node id="32608" label="WP_007095313_1" cy:nodeId="31655">
    <graphics x="1013.9978932224292" z="0.0" y="1671.137494872502"/>
  </node>
  <node id="32595" label="BAU44627_3" cy:nodeId="31687">
    <graphics x="1297.8013473378119" z="0.0" y="1687.2072090633174"/>
  </node>
  <node id="33287" label="RCJ14929_6" cy:nodeId="5095">
    <graphics x="-701.3178332096718" z="0.0" y="-1270.271553839633"/>
  </node>
  <node id="32581" label="WP_094345265_1" cy:nodeId="31719">
    <graphics x="503.665584624861" z="0.0" y="2257.788123154057"/>
  </node>
  <node id="32868" label="WP_096559014_9" cy:nodeId="30728">
    <graphics x="699.5750411197885" z="0.0" y="815.2593986682198"/>
  </node>
  <node id="32565" label="WP_015140719_1" cy:nodeId="31752">
    <graphics x="1729.9625799003159" z="0.0" y="1912.6283082428022"/>
  </node>
  <node id="33580" label="WP_017198207_3" cy:nodeId="1064">
    <graphics x="-1078.360216258757" z="0.0" y="-13.12587835352187"/>
  </node>
  <node id="32548" label="WP_094345265_2" cy:nodeId="31784">
    <graphics x="-1546.242027390799" z="0.0" y="2261.475313432387"/>
  </node>
  <node id="33949" label="WP_096559014_1" cy:nodeId="72">
    <graphics x="-638.5509420220326" z="0.0" y="-1219.8054535394947"/>
  </node>
  <node id="33567" label="WP_153461219_3" cy:nodeId="1096">
    <graphics x="-919.7876601407413" z="0.0" y="-78.42170270029467"/>
  </node>
  <node id="32532" label="WP_068150862_1" cy:nodeId="31816">
    <graphics x="-339.5280762799591" z="0.0" y="2161.6212484909806"/>
  </node>
  <node id="33933" label="WP_087539234_4" cy:nodeId="104">
    <graphics x="-643.0294319115048" z="0.0" y="-1168.7784180544147"/>
  </node>
  <node id="33917" label="RCJ30949_2" cy:nodeId="136">
    <graphics x="-741.414965340256" z="0.0" y="-1242.0037037708278"/>
  </node>
  <node id="33192" label="WP_017749323_1" cy:nodeId="9352">
    <graphics x="-782.2283460629692" z="0.0" y="-1108.4629579424106"/>
  </node>
  <node id="33007" label="WP_015127932_5" cy:nodeId="29832">
    <graphics x="1646.2698671554465" z="0.0" y="-1343.3574396382517"/>
  </node>
  <node id="32499" label="WP_051859750_1" cy:nodeId="31880">
    <graphics x="1948.3267878405243" z="0.0" y="2161.6212484909806"/>
  </node>
  <node id="33901" label="RCJ14929_3" cy:nodeId="168">
    <graphics x="-652.3046352684316" z="0.0" y="-1206.5103423942526"/>
  </node>
  <node id="33544" label="WP_073644071_1" cy:nodeId="1192">
    <graphics x="-648.916110621328" z="0.0" y="-1303.7424950707534"/>
  </node>
  <node id="32833" label="WP_109497443_4" cy:nodeId="30888">
    <graphics x="-1736.1069537191759" z="0.0" y="1152.935410804479"/>
  </node>
  <node id="32482" label="KQP70226_2" cy:nodeId="31912">
    <graphics x="-1241.2110882886261" z="0.0" y="2479.6266729904924"/>
  </node>
  <node id="33885" label="WP_071189061_2" cy:nodeId="200">
    <graphics x="-661.7999332311151" z="0.0" y="-1275.0073407392663"/>
  </node>
  <node id="32991" label="WP_026100063_9" cy:nodeId="29896">
    <graphics x="1640.156032774343" z="0.0" y="-1379.5553766499704"/>
  </node>
  <node id="33869" label="WP_096664869_5" cy:nodeId="232">
    <graphics x="-395.8493897316797" z="0.0" y="-1315.5665245762973"/>
  </node>
  <node id="33355" label="WP_087539234_9" cy:nodeId="3304">
    <graphics x="-757.9906559917431" z="0.0" y="-1104.8115064750489"/>
  </node>
  <node id="32444" label="WP_108116368_1" cy:nodeId="31976">
    <graphics x="917.9965037218719" z="0.0" y="2440.8152105881486"/>
  </node>
  <node id="32423" label="WP_120754718_4" cy:nodeId="32008">
    <graphics x="2048.171026121774" z="0.0" y="2548.5373785568986"/>
  </node>
  <node id="33838" label="WP_109013279_1" cy:nodeId="296">
    <graphics x="-1016.300924229871" z="0.0" y="-1262.7829062129783"/>
  </node>
  <node id="33350" label="WP_012409362_3" cy:nodeId="3368">
    <graphics x="-630.4907139347335" z="0.0" y="-1196.8750011137633"/>
  </node>
  <node id="33216" label="WP_161481447_1" cy:nodeId="7464">
    <graphics x="-469.34853419722026" z="0.0" y="-214.8625556865943"/>
  </node>
  <node id="32380" label="WP_162681093_1" cy:nodeId="32072">
    <graphics x="-38.42316638310854" z="0.0" y="2701.263605363539"/>
  </node>
  <node id="33807" label="WP_062346719_1" cy:nodeId="360">
    <graphics x="-474.14395862843344" z="0.0" y="-64.45400497833046"/>
  </node>
  <node id="33199" label="WP_138498533_2" cy:nodeId="8552">
    <graphics x="-945.1789174205321" z="0.0" y="-1213.406412189728"/>
  </node>
  <node id="32359" label="TCM33822_1" cy:nodeId="32104">
    <graphics x="1091.7513560167938" z="0.0" y="2808.985773332289"/>
  </node>
  <node id="33784" label="WP_079181075_4" cy:nodeId="424">
    <graphics x="-999.20213631601" z="0.0" y="-121.72267567882116"/>
  </node>
  <node id="32316" label="WP_045296661_1" cy:nodeId="32168">
    <graphics x="-965.5802365430206" z="0.0" y="2908.985773332289"/>
  </node>
  <node id="32295" label="WP_131076036_1" cy:nodeId="32200">
    <graphics x="164.5942858568817" z="0.0" y="3016.707941301039"/>
  </node>
  <node id="33511" label="AVH79535_1" cy:nodeId="1512">
    <graphics x="-1053.2694435253213" z="0.0" y="-1338.5782837607146"/>
  </node>
  <node id="33401" label="WP_151696789_3" cy:nodeId="2536">
    <graphics x="-1035.061846813914" z="0.0" y="-1334.1287442268401"/>
  </node>
  <node id="33736" label="WP_019501955_9007" cy:nodeId="520">
    <graphics x="-1157.220368974464" z="0.0" y="-1219.4816904553625"/>
  </node>
  <node id="32756" label="WP_157846946_3" cy:nodeId="31240">
    <graphics x="362.41297329584654" z="0.0" y="1249.0365641190324"/>
  </node>
  <node id="33724" label="WP_079181075_2" cy:nodeId="552">
    <graphics x="-1079.0747148272578" z="0.0" y="-174.73799657231464"/>
  </node>
  <node id="33499" label="WP_106289349_3" cy:nodeId="1576">
    <graphics x="-1074.0503897730084" z="0.0" y="-1278.4373262723855"/>
  </node>
  <node id="33181" label="WP_030169499_3" cy:nodeId="10792">
    <graphics x="-723.2619478408244" z="0.0" y="-102.78300681090926"/>
  </node>
  <node id="32932" label="WP_015216084_11" cy:nodeId="30248">
    <graphics x="-1807.6106788562274" z="0.0" y="618.6089081284792"/>
  </node>
  <node id="32745" label="WP_168645325_3" cy:nodeId="31272">
    <graphics x="843.5591322454218" z="0.0" y="1151.3164134706044"/>
  </node>
  <node id="32716" label="WP_015078657_11" cy:nodeId="31368">
    <graphics x="1089.6097904572196" z="0.0" y="1219.7511013841884"/>
  </node>
  <node id="33325" label="WP_008380405_4" cy:nodeId="3752">
    <graphics x="-804.9385628336104" z="0.0" y="-4.17430154237681"/>
  </node>
  <node id="33481" label="WP_015127932_1" cy:nodeId="1736">
    <graphics x="-687.1006885884267" z="0.0" y="-1167.8387417617084"/>
  </node>
  <node id="32913" label="WP_068252194_2" cy:nodeId="30408">
    <graphics x="-344.44745033528966" z="0.0" y="616.1281273059151"/>
  </node>
  <node id="33667" label="WP_015216084_7" cy:nodeId="744">
    <graphics x="-986.2114738419466" z="0.0" y="-1266.1029328649345"/>
  </node>
  <node id="33474" label="WP_114082527_5" cy:nodeId="1800">
    <graphics x="-679.1049475510658" z="0.0" y="-1275.2455856494669"/>
  </node>
  <node id="33097" label="WP_045869173_2" cy:nodeId="28424">
    <graphics x="349.2354814742946" z="0.0" y="-1370.068194032783"/>
  </node>
  <node id="33028" label="WP_096589596_1" cy:nodeId="29448">
    <graphics x="1208.1079523300066" z="0.0" y="-1374.8239313374704"/>
  </node>
  <node id="33081" label="WP_039742608_1" cy:nodeId="28456">
    <graphics x="468.495582792654" z="0.0" y="-1456.8718591939157"/>
  </node>
  <node id="32650" label="AWS47415_7" cy:nodeId="31560">
    <graphics x="-1689.3019728433135" z="0.0" y="1535.9652545614924"/>
  </node>
  <node id="32635" label="OBQ23191_1" cy:nodeId="31592">
    <graphics x="2386.523429423588" z="0.0" y="1687.4142184937975"/>
  </node>
  <node id="32891" label="WP_062348671_4" cy:nodeId="30632">
    <graphics x="466.8505614444955" z="0.0" y="593.3971244982979"/>
  </node>
  <node id="33594" label="WP_138499068_1" cy:nodeId="1000">
    <graphics x="-677.4630807268836" z="0.0" y="-1139.4844668311014"/>
  </node>
  <node id="33187" label="WP_017581465_2" cy:nodeId="10216">
    <graphics x="-535.9641281160523" z="0.0" y="-287.55323111141354"/>
  </node>
  <node id="32564" label="WP_103138325_2" cy:nodeId="31753">
    <graphics x="1836.722900563768" z="0.0" y="1927.3754395904584"/>
  </node>
  <node id="32852" label="WP_017569537_3" cy:nodeId="30793">
    <graphics x="1617.4128588564054" z="0.0" y="739.0914094187008"/>
  </node>
  <node id="32531" label="ANI93503_4" cy:nodeId="31817">
    <graphics x="-322.8860016949982" z="0.0" y="2268.1083090378556"/>
  </node>
  <node id="33145" label="WP_040022866_2" cy:nodeId="15465">
    <graphics x="-667.4492336357589" z="0.0" y="-164.11834744192927"/>
  </node>
  <node id="32847" label="WP_133890759_1" cy:nodeId="30825">
    <graphics x="1228.2422703401448" z="0.0" y="756.1839267339225"/>
  </node>
  <node id="32498" label="WP_095933898_1" cy:nodeId="31881">
    <graphics x="2055.087108503976" z="0.0" y="2176.368379838637"/>
  </node>
  <node id="33302" label="ROV70439_1" cy:nodeId="4265">
    <graphics x="-734.1202155738949" z="0.0" y="-296.857952312194"/>
  </node>
  <node id="33221" label="WP_104899482_7" cy:nodeId="7337">
    <graphics x="-1203.86574527176" z="0.0" y="-1414.232586884598"/>
  </node>
  <node id="32465" label="WP_013190653_2" cy:nodeId="31945">
    <graphics x="-115.19547091802065" z="0.0" y="2548.5373785568986"/>
  </node>
  <node id="33853" label="WP_011610106_2" cy:nodeId="265">
    <graphics x="-943.8117024440714" z="0.0" y="-1234.6063575610349"/>
  </node>
  <node id="32422" label="WP_058047489_4" cy:nodeId="32009">
    <graphics x="2051.1884783617643" z="0.0" y="2440.8152105881486"/>
  </node>
  <node id="33250" label="WP_015207767_6" cy:nodeId="6441">
    <graphics x="-773.6318490847766" z="0.0" y="-1114.6624002850328"/>
  </node>
  <node id="33215" label="WP_161481447_5" cy:nodeId="7465">
    <graphics x="-393.04091188721327" z="0.0" y="-169.01194522067706"/>
  </node>
  <node id="32979" label="WP_018960901_2" cy:nodeId="29993">
    <graphics x="2081.1965047971835" z="0.0" y="-1366.5108197659308"/>
  </node>
  <node id="32803" label="WP_097866484_4" cy:nodeId="31017">
    <graphics x="1924.4304594277214" z="0.0" y="628.7166193027712"/>
  </node>
  <node id="32401" label="WP_015078657_8" cy:nodeId="32041">
    <graphics x="-1071.6151410230011" z="0.0" y="2808.985773332289"/>
  </node>
  <node id="33822" label="WP_096689510_5" cy:nodeId="329">
    <graphics x="-873.7691959007924" z="0.0" y="-1241.0597384810278"/>
  </node>
  <node id="33526" label="WP_086769105_2" cy:nodeId="1385">
    <graphics x="-801.8260644669931" z="0.0" y="-1196.3006716551788"/>
  </node>
  <node id="33340" label="WP_096285992_2" cy:nodeId="3433">
    <graphics x="-995.4786842152469" z="0.0" y="-449.8030305973723"/>
  </node>
  <node id="32358" label="WP_138897977_2" cy:nodeId="32105">
    <graphics x="1094.768808256784" z="0.0" y="2701.263605363539"/>
  </node>
  <node id="32337" label="WP_017311237_2" cy:nodeId="32137">
    <graphics x="2224.943330656686" z="0.0" y="2808.985773332289"/>
  </node>
  <node id="33522" label="WP_026100063_3" cy:nodeId="1449">
    <graphics x="-716.7707453919279" z="0.0" y="-1262.160346684064"/>
  </node>
  <node id="33767" label="ALC22075_5" cy:nodeId="457">
    <graphics x="-1054.3596254076501" z="0.0" y="-254.84515521661402"/>
  </node>
  <node id="33125" label="WP_052269673_5" cy:nodeId="19913">
    <graphics x="-669.6264274559444" z="0.0" y="-92.90301135634084"/>
  </node>
  <node id="32294" label="WP_130690339_1" cy:nodeId="32201">
    <graphics x="167.61173809687193" z="0.0" y="2908.985773332289"/>
  </node>
  <node id="33751" label="WP_093619522_1" cy:nodeId="489">
    <graphics x="-1073.3198587927266" z="0.0" y="-114.94689273005386"/>
  </node>
  <node id="32953" label="WP_066383651_7" cy:nodeId="30185">
    <graphics x="-819.7218800671906" z="0.0" y="896.597154863051"/>
  </node>
  <node id="32765" label="KQB97104_1" cy:nodeId="31209">
    <graphics x="-176.16258822759096" z="0.0" y="1239.9183580948625"/>
  </node>
  <node id="32273" label="WP_006619051_3" cy:nodeId="32233">
    <graphics x="1297.7862604967743" z="0.0" y="3016.707941301039"/>
  </node>
  <node id="32943" label="WP_167721203_9" cy:nodeId="30217">
    <graphics x="-1701.0384284900165" z="0.0" y="571.336874437073"/>
  </node>
  <node id="33294" label="WP_084890433_2" cy:nodeId="4681">
    <graphics x="-774.5411566045016" z="0.0" y="70.40371624248783"/>
  </node>
  <node id="33706" label="WP_009343975_2" cy:nodeId="617">
    <graphics x="-749.6493090659201" z="0.0" y="-1274.3056983469467"/>
  </node>
  <node id="33696" label="WP_016950446_3" cy:nodeId="649">
    <graphics x="-743.1437977644086" z="0.0" y="-1218.9753654847334"/>
  </node>
  <node id="33687" label="WP_096559014_6" cy:nodeId="681">
    <graphics x="-681.8439002650844" z="0.0" y="-1267.2376513043016"/>
  </node>
  <node id="33037" label="WP_106371152_6" cy:nodeId="29417">
    <graphics x="691.2410394882106" z="0.0" y="-1295.5506850491709"/>
  </node>
  <node id="32686" label="WP_012409237_5" cy:nodeId="31465">
    <graphics x="-208.17987669141303" z="0.0" y="1582.8024273688748"/>
  </node>
  <node id="32672" label="WP_094742457_4" cy:nodeId="31497">
    <graphics x="-102.7561072288405" z="0.0" y="1501.2524084037964"/>
  </node>
  <node id="33648" label="WP_164394909_1" cy:nodeId="809">
    <graphics x="-1020.9352389264029" z="0.0" y="-69.82037215147878"/>
  </node>
  <node id="33465" label="WP_097866484_1" cy:nodeId="1833">
    <graphics x="-834.3995516827789" z="0.0" y="-375.6569021792154"/>
  </node>
  <node id="32661" label="WP_047015652_2" cy:nodeId="31529">
    <graphics x="-1480.8253167657415" z="0.0" y="1592.9306999495798"/>
  </node>
  <node id="32905" label="WP_065960366_1" cy:nodeId="30537">
    <graphics x="158.07893974039393" z="0.0" y="708.8870689563057"/>
  </node>
  <node id="33627" label="RCJ40850_1" cy:nodeId="873">
    <graphics x="-903.6045259074589" z="0.0" y="-1097.963472196792"/>
  </node>
  <node id="33203" label="WP_096569967_1" cy:nodeId="8041">
    <graphics x="-715.2776587739058" z="0.0" y="-1198.6702333139435"/>
  </node>
  <node id="32622" label="WP_008180360_6" cy:nodeId="31625">
    <graphics x="1437.5347952070197" z="0.0" y="1603.6512326097743"/>
  </node>
  <node id="32890" label="WP_131969051_2" cy:nodeId="30633">
    <graphics x="400.156347577308" z="0.0" y="669.0657341174385"/>
  </node>
  <node id="33589" label="WP_169219633_2" cy:nodeId="1034">
    <graphics x="-916.9262712390907" z="0.0" y="-1113.0018318728723"/>
  </node>
  <node id="32862" label="WP_096547181_4" cy:nodeId="30762">
    <graphics x="1608.6254900819913" z="0.0" y="669.5529751516567"/>
  </node>
  <node id="33948" label="WP_138498533_4" cy:nodeId="74">
    <graphics x="-922.4587250611792" z="0.0" y="-1262.5785068212606"/>
  </node>
  <node id="33286" label="WP_129307298_4" cy:nodeId="5194">
    <graphics x="-400.1895811601073" z="0.0" y="-70.38044209706143"/>
  </node>
  <node id="33932" label="WP_015210601_6" cy:nodeId="106">
    <graphics x="-565.7915075770863" z="0.0" y="-1244.2393209399486"/>
  </node>
  <node id="33562" label="WP_168357543_1" cy:nodeId="1130">
    <graphics x="-655.0539259938225" z="0.0" y="-1175.9704403262765"/>
  </node>
  <node id="32514" label="WP_092614753_2" cy:nodeId="31850">
    <graphics x="921.5857542864471" z="0.0" y="2161.6212484909806"/>
  </node>
  <node id="33916" label="WP_071189061_3" cy:nodeId="138">
    <graphics x="-633.1071972044585" z="0.0" y="-1195.685432257207"/>
  </node>
  <node id="33433" label="WP_015193424_5" cy:nodeId="2186">
    <graphics x="-983.9222063118057" z="0.0" y="-1149.4172024871984"/>
  </node>
  <node id="33006" label="WP_010996095_3" cy:nodeId="29834">
    <graphics x="1577.706440184011" z="0.0" y="-1279.674181581611"/>
  </node>
  <node id="33900" label="WP_089091039_2" cy:nodeId="170">
    <graphics x="-696.1123752558774" z="0.0" y="-1147.1604508964408"/>
  </node>
  <node id="32994" label="WP_099071810_4" cy:nodeId="29866">
    <graphics x="1557.3551141952414" z="0.0" y="-1473.245440126533"/>
  </node>
  <node id="33884" label="WP_006195640_7" cy:nodeId="202">
    <graphics x="-736.8938873958245" z="0.0" y="-1187.5757077085034"/>
  </node>
  <node id="32464" label="WP_062294404_1" cy:nodeId="31946">
    <graphics x="-112.17801867803041" z="0.0" y="2440.8152105881486"/>
  </node>
  <node id="33868" label="WP_168496018_3" cy:nodeId="234">
    <graphics x="-453.4593981706706" z="0.0" y="-1324.644724039961"/>
  </node>
  <node id="32443" label="WP_049802506_3" cy:nodeId="31978">
    <graphics x="1017.9965037218719" z="0.0" y="2548.5373785568986"/>
  </node>
  <node id="33542" label="WP_086760950_12" cy:nodeId="1290">
    <graphics x="-1056.2381453765845" z="0.0" y="-1029.1558526539773"/>
  </node>
  <node id="33298" label="WP_162399505_2" cy:nodeId="4362">
    <graphics x="-721.5115329521063" z="0.0" y="-1284.7461314273712"/>
  </node>
  <node id="33837" label="WP_017721129_1" cy:nodeId="298">
    <graphics x="-886.6100184247179" z="0.0" y="-1155.3681034231156"/>
  </node>
  <node id="32400" label="TAE59458_9010" cy:nodeId="32042">
    <graphics x="-1068.5976887830109" z="0.0" y="2701.263605363539"/>
  </node>
  <node id="32379" label="WP_168880029_1" cy:nodeId="32074">
    <graphics x="61.57683361689146" z="0.0" y="2808.985773332289"/>
  </node>
  <node id="33806" label="WP_155349848_2" cy:nodeId="362">
    <graphics x="-528.6663048818239" z="0.0" y="-181.8984581798202"/>
  </node>
  <node id="33417" label="AVH79456_7" cy:nodeId="2410">
    <graphics x="-1151.2233341658432" z="0.0" y="-1250.2369975752842"/>
  </node>
  <node id="33794" label="WP_015216084_6" cy:nodeId="394">
    <graphics x="-894.5910988040549" z="0.0" y="-1334.584710695275"/>
  </node>
  <node id="32784" label="CNF13542_4" cy:nodeId="31114">
    <graphics x="-655.8000742533673" z="0.0" y="1165.7250088548915"/>
  </node>
  <node id="32336" label="WP_016863105_1" cy:nodeId="32138">
    <graphics x="2227.9607828966764" z="0.0" y="2701.263605363539"/>
  </node>
  <node id="33783" label="WP_079189213_2" cy:nodeId="426">
    <graphics x="-1012.4488847074906" z="0.0" y="-19.97667605154001"/>
  </node>
  <node id="32315" label="WP_124970176_3" cy:nodeId="32170">
    <graphics x="-865.5802365430206" z="0.0" y="3016.707941301039"/>
  </node>
  <node id="33296" label="WP_087542717_1" cy:nodeId="4554">
    <graphics x="-876.2718937080634" z="0.0" y="-1196.8131473866122"/>
  </node>
  <node id="33400" label="WP_096679519_4" cy:nodeId="2538">
    <graphics x="-1040.9139971917896" z="0.0" y="-1318.566707485257"/>
  </node>
  <node id="32764" label="WP_110278359_1" cy:nodeId="31210">
    <graphics x="-234.68994723638002" z="0.0" y="1259.7020609452043"/>
  </node>
  <node id="32272" label="WP_006622760_10" cy:nodeId="32234">
    <graphics x="1300.8037127367645" z="0.0" y="2908.985773332289"/>
  </node>
  <node id="33735" label="WP_019501955_10" cy:nodeId="522">
    <graphics x="-1323.7782274711356" z="0.0" y="-1232.7536779041582"/>
  </node>
  <node id="32755" label="WP_153461219_7" cy:nodeId="31242">
    <graphics x="136.54408444086607" z="0.0" y="1242.7855570389543"/>
  </node>
  <node id="32931" label="AVH79456_6" cy:nodeId="30250">
    <graphics x="-1768.9993965075946" z="0.0" y="708.4686188218386"/>
  </node>
  <node id="33490" label="WP_066371470_5" cy:nodeId="1610">
    <graphics x="-584.6226719446942" z="0.0" y="-65.73925712248322"/>
  </node>
  <node id="33049" label="WP_073591536_3" cy:nodeId="29258">
    <graphics x="650.8370439742946" z="0.0" y="-1234.429133535499"/>
  </node>
  <node id="33485" label="WP_062346719_3" cy:nodeId="1642">
    <graphics x="-572.6312841491537" z="0.0" y="-185.89303603940678"/>
  </node>
  <node id="32726" label="WP_136238412_2" cy:nodeId="31338">
    <graphics x="1216.1872539564333" z="0.0" y="1134.58973379907"/>
  </node>
  <node id="32715" label="WP_096664869_8" cy:nodeId="31370">
    <graphics x="1028.1883922943778" z="0.0" y="1248.2272518968837"/>
  </node>
  <node id="32707" label="WP_012409237_4" cy:nodeId="31402">
    <graphics x="1519.6743076650507" z="0.0" y="1099.56613303411"/>
  </node>
  <node id="32685" label="WP_094345265_4" cy:nodeId="31466">
    <graphics x="-288.1101363960032" z="0.0" y="1638.6239300544216"/>
  </node>
  <node id="33654" label="AVH79456_3" cy:nodeId="778">
    <graphics x="-1051.7688117338982" z="0.0" y="-1329.7914607355085"/>
  </node>
  <node id="33096" label="WP_127056592_1" cy:nodeId="28426">
    <graphics x="336.6410448287868" z="0.0" y="-1335.5271478902048"/>
  </node>
  <node id="33027" label="WP_015216084_1" cy:nodeId="29450">
    <graphics x="1305.9063226913338" z="0.0" y="-1346.7322031270212"/>
  </node>
  <node id="33080" label="WP_006196066_1" cy:nodeId="28458">
    <graphics x="417.1690752242946" z="0.0" y="-1336.070635439033"/>
  </node>
  <node id="32660" label="WP_051368293_2" cy:nodeId="31530">
    <graphics x="-1471.5970757989446" z="0.0" y="1672.9973427108102"/>
  </node>
  <node id="33316" label="WP_086769105_1" cy:nodeId="3914">
    <graphics x="-986.978489664644" z="0.0" y="-1218.0520955925638"/>
  </node>
  <node id="32649" label="WP_078760724_3" cy:nodeId="31562">
    <graphics x="-1696.9627928506377" z="0.0" y="1712.0615375204768"/>
  </node>
  <node id="33614" label="WP_012597836_3" cy:nodeId="906">
    <graphics x="-927.1029539834406" z="0.0" y="-1122.6490798421034"/>
  </node>
  <node id="33202" label="WP_096569967_2" cy:nodeId="8074">
    <graphics x="-777.5898370290811" z="0.0" y="-1291.1007879204296"/>
  </node>
  <node id="32621" label="WP_087592205_10" cy:nodeId="31626">
    <graphics x="1565.5786337079965" z="0.0" y="1630.248812565829"/>
  </node>
  <node id="33231" label="WP_057178590_4" cy:nodeId="7082">
    <graphics x="-736.4928396905593" z="0.0" y="-1175.8653925911237"/>
  </node>
  <node id="32607" label="WP_114901352_1" cy:nodeId="31658">
    <graphics x="980.6011647068043" z="0.0" y="1544.6696832880293"/>
  </node>
  <node id="32594" label="WP_086760950_8" cy:nodeId="31690">
    <graphics x="213.85103441423192" z="0.0" y="1933.364954184247"/>
  </node>
  <node id="32580" label="WP_093619522_2" cy:nodeId="31722">
    <graphics x="708.5647508445297" z="0.0" y="1912.6283082428022"/>
  </node>
  <node id="32563" label="WP_017655478_1" cy:nodeId="31755">
    <graphics x="1770.5562211814438" z="0.0" y="2012.4823731842084"/>
  </node>
  <node id="33579" label="WP_068210304_3" cy:nodeId="1067">
    <graphics x="-782.6441726606802" z="0.0" y="-46.00973442735861"/>
  </node>
  <node id="32861" label="WP_088679810_2" cy:nodeId="30763">
    <graphics x="1453.6496523744718" z="0.0" y="624.9910855032192"/>
  </node>
  <node id="32547" label="WP_059262025_1" cy:nodeId="31787">
    <graphics x="-1380.0753480084747" z="0.0" y="2161.6212484909806"/>
  </node>
  <node id="33285" label="WP_052269673_6" cy:nodeId="5195">
    <graphics x="-242.17834246667303" z="0.0" y="-44.44220417729824"/>
  </node>
  <node id="32530" label="WP_068099584_1" cy:nodeId="31819">
    <graphics x="-238.96964274724428" z="0.0" y="2200.4327108933244"/>
  </node>
  <node id="33436" label="WP_026100063_7" cy:nodeId="2155">
    <graphics x="-651.7717772195749" z="0.0" y="-1123.1401679943845"/>
  </node>
  <node id="32846" label="WP_079181075_3" cy:nodeId="30827">
    <graphics x="1314.3665074006917" z="0.0" y="581.258038672399"/>
  </node>
  <node id="32513" label="WP_116947187_2" cy:nodeId="31851">
    <graphics x="1028.3460749498993" z="0.0" y="2176.368379838637"/>
  </node>
  <node id="32839" label="WP_054237388_2" cy:nodeId="30859">
    <graphics x="1331.996237625301" z="0.0" y="665.0974704350944"/>
  </node>
  <node id="32497" label="WP_051715083_2" cy:nodeId="31883">
    <graphics x="1988.9204291216522" z="0.0" y="2261.475313432387"/>
  </node>
  <node id="33301" label="WP_164496180_1" cy:nodeId="4267">
    <graphics x="-734.4337071035054" z="0.0" y="-178.20003368173528"/>
  </node>
  <node id="32481" label="WP_168880027_4" cy:nodeId="31915">
    <graphics x="-1141.2110882886261" z="0.0" y="2440.8152105881486"/>
  </node>
  <node id="32815" label="PIR21572_1" cy:nodeId="30955">
    <graphics x="2361.1712741144065" z="0.0" y="537.9443929541574"/>
  </node>
  <node id="32442" label="WP_013321440_2" cy:nodeId="31979">
    <graphics x="1021.0139559618622" z="0.0" y="2440.8152105881486"/>
  </node>
  <node id="33852" label="WP_124155194_2" cy:nodeId="267">
    <graphics x="-932.1884322214453" z="0.0" y="-1208.7503692622593"/>
  </node>
  <node id="33253" label="WP_096589596_7" cy:nodeId="6411">
    <graphics x="-948.4227672005352" z="0.0" y="-1386.9699874589166"/>
  </node>
  <node id="32421" label="RCJ25433_2" cy:nodeId="32011">
    <graphics x="2151.1884783617643" z="0.0" y="2548.5373785568986"/>
  </node>
  <node id="33214" label="WP_161481447_3" cy:nodeId="7467">
    <graphics x="-325.60956764211846" z="0.0" y="-255.75029199521546"/>
  </node>
  <node id="32978" label="WP_114054648_2" cy:nodeId="29995">
    <graphics x="2091.57969876691" z="0.0" y="-1266.826093050843"/>
  </node>
  <node id="33821" label="WP_012595952_5" cy:nodeId="331">
    <graphics x="-901.4083465010907" z="0.0" y="-1233.4739188053825"/>
  </node>
  <node id="32378" label="WP_168880027_1" cy:nodeId="32075">
    <graphics x="64.5942858568817" z="0.0" y="2701.263605363539"/>
  </node>
  <node id="32357" label="WP_070396036_2" cy:nodeId="32107">
    <graphics x="1194.768808256784" z="0.0" y="2808.985773332289"/>
  </node>
  <node id="32777" label="WP_168645325_6" cy:nodeId="31147">
    <graphics x="-980.7866969179081" z="0.0" y="1138.2986198714545"/>
  </node>
  <node id="32314" label="OGQ08743_2" cy:nodeId="32171">
    <graphics x="-862.5627843030304" z="0.0" y="2908.985773332289"/>
  </node>
  <node id="33766" label="WP_133890759_3" cy:nodeId="459">
    <graphics x="-913.5571498232537" z="0.0" y="-112.44973225394531"/>
  </node>
  <node id="32293" label="WP_017743137_2" cy:nodeId="32203">
    <graphics x="267.61173809687193" z="0.0" y="3016.707941301039"/>
  </node>
  <node id="33750" label="WP_093619522_4" cy:nodeId="491">
    <graphics x="-1072.6371524344079" z="0.0" y="-230.50784459521557"/>
  </node>
  <node id="32952" label="WP_103136595_4" cy:nodeId="30187">
    <graphics x="-841.5436879285187" z="0.0" y="1025.387790925673"/>
  </node>
  <node id="32942" label="WP_012597836_8" cy:nodeId="30219">
    <graphics x="-1695.0142890857196" z="0.0" y="601.9477447984011"/>
  </node>
  <node id="33396" label="BAY08128_4" cy:nodeId="2635">
    <graphics x="-442.18568667388115" z="0.0" y="-1467.0395797184499"/>
  </node>
  <node id="32737" label="WP_096664869_3" cy:nodeId="31307">
    <graphics x="1819.7035233844563" z="0.0" y="1260.3001743043453"/>
  </node>
  <node id="33705" label="WP_038089561_2" cy:nodeId="619">
    <graphics x="-671.8156868379151" z="0.0" y="-1260.4550246672768"/>
  </node>
  <node id="33390" label="WP_096681247_8" cy:nodeId="2667">
    <graphics x="-746.2738734935115" z="0.0" y="-1172.4143598652042"/>
  </node>
  <node id="33194" label="WP_018550639_1" cy:nodeId="8811">
    <graphics x="-633.019451787427" z="0.0" y="-375.39375567550337"/>
  </node>
  <node id="33324" label="WP_122818055_9006" cy:nodeId="3755">
    <graphics x="-818.7118477617851" z="0.0" y="-78.27836962641462"/>
  </node>
  <node id="32706" label="WP_094345265_3" cy:nodeId="31403">
    <graphics x="1580.6162632314567" z="0.0" y="1213.0913634418248"/>
  </node>
  <node id="32696" label="WP_062437448_2" cy:nodeId="31435">
    <graphics x="511.5432791814328" z="0.0" y="1646.442882671092"/>
  </node>
  <node id="33666" label="WP_086760950_4" cy:nodeId="747">
    <graphics x="-1061.3385355043863" z="0.0" y="-1340.3702534954243"/>
  </node>
  <node id="32671" label="WP_092614753_1" cy:nodeId="31499">
    <graphics x="-850.2160865748774" z="0.0" y="1596.477587590243"/>
  </node>
  <node id="33647" label="WP_068150862_3" cy:nodeId="811">
    <graphics x="-996.4192209359833" z="0.0" y="57.65518051102973"/>
  </node>
  <node id="33464" label="WP_093908736_1" cy:nodeId="1835">
    <graphics x="-822.2234052438516" z="0.0" y="-321.33221420620123"/>
  </node>
  <node id="33131" label="WP_003963573_2" cy:nodeId="18251">
    <graphics x="-664.7601788534894" z="0.0" y="-46.430993963591874"/>
  </node>
  <node id="33014" label="WP_087592205_1" cy:nodeId="29515">
    <graphics x="1410.370769712819" z="0.0" y="-1388.369951845283"/>
  </node>
  <node id="32904" label="BAN83919_1" cy:nodeId="30539">
    <graphics x="97.76961356851893" z="0.0" y="683.5007164172432"/>
  </node>
  <node id="33626" label="WP_169219633_3" cy:nodeId="875">
    <graphics x="-911.7488427293417" z="0.0" y="-1246.1301624210498"/>
  </node>
  <node id="33179" label="WP_163927072_3" cy:nodeId="11115">
    <graphics x="-1005.4675116889109" z="0.0" y="-1466.406782127993"/>
  </node>
  <node id="32895" label="WP_106236741_1" cy:nodeId="30571">
    <graphics x="128.57054740640956" z="0.0" y="646.3370353869698"/>
  </node>
  <node id="33138" label="WP_068099584_2" cy:nodeId="17291">
    <graphics x="-946.2766597056404" z="0.0" y="35.870063810457765"/>
  </node>
  <node id="33601" label="OBQ01900_2" cy:nodeId="939">
    <graphics x="-898.4911375581568" z="0.0" y="-1206.0163625971943"/>
  </node>
  <node id="33453" label="WP_162398402_1" cy:nodeId="1963">
    <graphics x="-915.6136052267673" z="0.0" y="-1139.5912033940147"/>
  </node>
  <node id="32889" label="PZN45587_1" cy:nodeId="30635">
    <graphics x="340.58031303140956" z="0.0" y="648.5065605334541"/>
  </node>
  <node id="33595" label="WP_138499068_4" cy:nodeId="971">
    <graphics x="-617.6924614375159" z="0.0" y="-1208.9023380350734"/>
  </node>
  <node id="32593" label="WP_104899482_5" cy:nodeId="31691">
    <graphics x="87.35220934099016" z="0.0" y="1966.7141973483094"/>
  </node>
  <node id="32579" label="WP_109595189_3" cy:nodeId="31723">
    <graphics x="815.3250715079819" z="0.0" y="1927.3754395904584"/>
  </node>
  <node id="32867" label="WP_137906310_3" cy:nodeId="30732">
    <graphics x="773.30711204264" z="0.0" y="879.4754478625557"/>
  </node>
  <node id="32546" label="WP_087811088_1" cy:nodeId="31788">
    <graphics x="-1344.4818383344025" z="0.0" y="2263.3633749558244"/>
  </node>
  <node id="33947" label="WP_066383651_5" cy:nodeId="76">
    <graphics x="-647.0631446961481" z="0.0" y="-1219.5175387397937"/>
  </node>
  <node id="33931" label="CEJ45116_5" cy:nodeId="108">
    <graphics x="-718.3614932111518" z="0.0" y="-1348.386284821743"/>
  </node>
  <node id="33915" label="WP_069073064_1" cy:nodeId="140">
    <graphics x="-654.2711616127337" z="0.0" y="-1173.7288103587523"/>
  </node>
  <node id="33432" label="WP_105222244_2" cy:nodeId="2188">
    <graphics x="-945.3403055261285" z="0.0" y="-1199.7030456962127"/>
  </node>
  <node id="33005" label="WP_015212417_7" cy:nodeId="29836">
    <graphics x="1727.8930093978781" z="0.0" y="-1426.3632379780954"/>
  </node>
  <node id="33899" label="WP_011321056_5" cy:nodeId="172">
    <graphics x="-682.410129440686" z="0.0" y="-1309.6134525248378"/>
  </node>
  <node id="32480" label="WP_018486514_4" cy:nodeId="31916">
    <graphics x="-1105.6175786145538" z="0.0" y="2542.5573370529924"/>
  </node>
  <node id="33883" label="WP_066383651_2" cy:nodeId="204">
    <graphics x="-747.6058398947057" z="0.0" y="-1250.1387946645443"/>
  </node>
  <node id="32463" label="WP_096583741_2" cy:nodeId="31948">
    <graphics x="-12.178018678030412" z="0.0" y="2548.5373785568986"/>
  </node>
  <node id="33867" label="OBQ18150_1" cy:nodeId="236">
    <graphics x="-317.6522732553125" z="0.0" y="-1409.9921102396509"/>
  </node>
  <node id="33541" label="TVP63782_5" cy:nodeId="1292">
    <graphics x="-955.4499321573228" z="0.0" y="-1301.7450108841474"/>
  </node>
  <node id="32420" label="WP_073642495_1" cy:nodeId="32012">
    <graphics x="2154.2059306017545" z="0.0" y="2440.8152105881486"/>
  </node>
  <node id="33836" label="WP_086769105_4" cy:nodeId="300">
    <graphics x="-856.31549460141" z="0.0" y="-1114.1795804375613"/>
  </node>
  <node id="32399" label="WP_006622760_12" cy:nodeId="32044">
    <graphics x="-968.5976887830109" z="0.0" y="2808.985773332289"/>
  </node>
  <node id="32796" label="WP_096285992_4" cy:nodeId="31052">
    <graphics x="-1342.391809571585" z="0.0" y="1160.5252878739152"/>
  </node>
  <node id="33805" label="WP_155349848_3" cy:nodeId="364">
    <graphics x="-639.6655883207213" z="0.0" y="-147.80123650658678"/>
  </node>
  <node id="33525" label="TAE59458_2" cy:nodeId="1388">
    <graphics x="-685.4845480579238" z="0.0" y="-1271.6772170582733"/>
  </node>
  <node id="32356" label="WP_071107270_3" cy:nodeId="32108">
    <graphics x="1197.7862604967743" z="0.0" y="2701.263605363539"/>
  </node>
  <node id="33793" label="WP_068385845_3" cy:nodeId="396">
    <graphics x="-871.1395723663435" z="0.0" y="-1160.2586813558771"/>
  </node>
  <node id="32335" label="WP_096594214_3" cy:nodeId="32140">
    <graphics x="2327.9607828966764" z="0.0" y="2808.985773332289"/>
  </node>
  <node id="33782" label="WP_127931424_2" cy:nodeId="428">
    <graphics x="-1143.93403021266" z="0.0" y="-30.381573162134856"/>
  </node>
  <node id="33134" label="WP_096537472_4" cy:nodeId="17868">
    <graphics x="-839.4595477641259" z="0.0" y="-1225.9297796258068"/>
  </node>
  <node id="32773" label="WP_153321593_2" cy:nodeId="31180">
    <graphics x="-505.7507535107941" z="0.0" y="1192.3168833328996"/>
  </node>
  <node id="32292" label="WP_155752488_2" cy:nodeId="32204">
    <graphics x="270.62919033686217" z="0.0" y="2908.985773332289"/>
  </node>
  <node id="33510" label="WP_171977306_1" cy:nodeId="1516">
    <graphics x="-888.1651353772312" z="0.0" y="-1370.2366587490721"/>
  </node>
  <node id="33399" label="WP_019505167_4" cy:nodeId="2540">
    <graphics x="-971.2359935316188" z="0.0" y="-908.1967397383003"/>
  </node>
  <node id="32763" label="WP_106358260_1" cy:nodeId="31212">
    <graphics x="-189.12853061040346" z="0.0" y="1132.9263422562394"/>
  </node>
  <node id="32271" label="AVH79607_3" cy:nodeId="32236">
    <graphics x="1400.8037127367645" z="0.0" y="3016.707941301039"/>
  </node>
  <node id="33734" label="ANS68054_2" cy:nodeId="524">
    <graphics x="-1116.1457881470212" z="0.0" y="-132.78348917331348"/>
  </node>
  <node id="33275" label="WP_011321056_3" cy:nodeId="5644">
    <graphics x="-681.1968092933234" z="0.0" y="-1156.5141740452561"/>
  </node>
  <node id="32754" label="WP_153461219_5" cy:nodeId="31244">
    <graphics x="81.85444630304869" z="0.0" y="1341.8205607010636"/>
  </node>
  <node id="33498" label="WP_035150190_3" cy:nodeId="1580">
    <graphics x="-980.495455969444" z="0.0" y="-1236.3432113978959"/>
  </node>
  <node id="33064" label="WP_087592205_5" cy:nodeId="29228">
    <graphics x="936.6873590682886" z="0.0" y="-1448.170790792579"/>
  </node>
  <node id="33489" label="WP_062346719_2" cy:nodeId="1612">
    <graphics x="-502.5242188398488" z="0.0" y="51.5258906344765"/>
  </node>
  <node id="33048" label="WP_073643028_4" cy:nodeId="29260">
    <graphics x="639.7882463668727" z="0.0" y="-1380.8286544095224"/>
  </node>
  <node id="32736" label="WP_099068319_1" cy:nodeId="31308">
    <graphics x="1820.8169419635578" z="0.0" y="1118.9323764527824"/>
  </node>
  <node id="32929" label="WP_104899482_6" cy:nodeId="30316">
    <graphics x="-1727.0642921374774" z="0.0" y="704.813681077698"/>
  </node>
  <node id="32714" label="WP_168465654_9" cy:nodeId="31372">
    <graphics x="1094.8517261872" z="0.0" y="1149.1358670091884"/>
  </node>
  <node id="33686" label="WP_038089561_1" cy:nodeId="684">
    <graphics x="-772.8289188494377" z="0.0" y="-1255.402822747437"/>
  </node>
  <node id="33384" label="WP_137451632_3" cy:nodeId="2732">
    <graphics x="-1166.723681404628" z="0.0" y="-74.38984318028682"/>
  </node>
  <node id="32695" label="WP_161483240_2" cy:nodeId="31436">
    <graphics x="555.9733820065977" z="0.0" y="1527.0740662953597"/>
  </node>
  <node id="33166" label="WP_029630331_3" cy:nodeId="12012">
    <graphics x="-925.6920951967174" z="0.0" y="-1223.115932094999"/>
  </node>
  <node id="32684" label="RCJ34841_3" cy:nodeId="31468">
    <graphics x="-336.7043136420974" z="0.0" y="1557.7964459235623"/>
  </node>
  <node id="33095" label="BAZ80283_1" cy:nodeId="28428">
    <graphics x="380.5646288131618" z="0.0" y="-1252.0290399800485"/>
  </node>
  <node id="33026" label="WP_015216084_2" cy:nodeId="29452">
    <graphics x="1243.187908384694" z="0.0" y="-1374.9777323018259"/>
  </node>
  <node id="32670" label="WP_135099815_2" cy:nodeId="31500">
    <graphics x="-722.7602836573969" z="0.0" y="1601.8816708421962"/>
  </node>
  <node id="33079" label="TWH40986_1" cy:nodeId="28460">
    <graphics x="489.34008047331804" z="0.0" y="-1265.1088129292673"/>
  </node>
  <node id="32659" label="WP_159425396_2" cy:nodeId="31532">
    <graphics x="-1557.4274705438177" z="0.0" y="1578.717382078486"/>
  </node>
  <node id="32648" label="WP_137451632_5" cy:nodeId="31564">
    <graphics x="-1793.5750546227935" z="0.0" y="1514.1632373495784"/>
  </node>
  <node id="33013" label="TVP63782_2" cy:nodeId="29548">
    <graphics x="1315.861705992115" z="0.0" y="-1439.5341516743845"/>
  </node>
  <node id="33613" label="WP_027845719_3" cy:nodeId="908">
    <graphics x="-814.1400621241478" z="0.0" y="-1132.7678366110956"/>
  </node>
  <node id="32620" label="WP_008180360_8" cy:nodeId="31628">
    <graphics x="1514.9194997968634" z="0.0" y="1546.440309714032"/>
  </node>
  <node id="33312" label="AVH79535_4" cy:nodeId="4109">
    <graphics x="-1151.7269310848499" z="0.0" y="-1117.3966795476915"/>
  </node>
  <node id="33260" label="WP_138499068_2" cy:nodeId="6157">
    <graphics x="-746.2004646351847" z="0.0" y="-1331.5363972109224"/>
  </node>
  <node id="33578" label="WP_155862233_4" cy:nodeId="1069">
    <graphics x="-764.2961142865472" z="0.0" y="-219.11546411752965"/>
  </node>
  <node id="33226" label="WP_096622718_1" cy:nodeId="7213">
    <graphics x="-814.1577056694887" z="0.0" y="-324.8943317771543"/>
  </node>
  <node id="32860" label="WP_104263878_1" cy:nodeId="30765">
    <graphics x="1512.76145733663" z="0.0" y="642.3002438284145"/>
  </node>
  <node id="32845" label="WP_015659226_1" cy:nodeId="30829">
    <graphics x="1275.027945388973" z="0.0" y="670.3740817632194"/>
  </node>
  <node id="32512" label="WP_069110514_2" cy:nodeId="31853">
    <graphics x="962.179395567575" z="0.0" y="2261.475313432387"/>
  </node>
  <node id="33222" label="BBD66616_1" cy:nodeId="7309">
    <graphics x="-1068.7264977615844" z="0.0" y="-924.5155587295474"/>
  </node>
  <node id="33300" label="WP_044386376_2" cy:nodeId="4269">
    <graphics x="-827.6535222886823" z="0.0" y="-201.0317438878472"/>
  </node>
  <node id="33220" label="WP_062071413_2" cy:nodeId="7341">
    <graphics x="-925.8797542719628" z="0.0" y="-438.77534030288257"/>
  </node>
  <node id="33283" label="WP_096575011_5" cy:nodeId="5325">
    <graphics x="-363.91998840632675" z="0.0" y="-1188.4015222722844"/>
  </node>
  <node id="32462" label="WP_015111489_1" cy:nodeId="31949">
    <graphics x="-9.160566438040178" z="0.0" y="2440.8152105881486"/>
  </node>
  <node id="32989" label="RCJ30949_12" cy:nodeId="29933">
    <graphics x="1600.8386728500266" z="0.0" y="-1327.978380800361"/>
  </node>
  <node id="32441" label="BBD66616_4" cy:nodeId="31981">
    <graphics x="1121.0139559618622" z="0.0" y="2548.5373785568986"/>
  </node>
  <node id="33851" label="WP_124970176_6" cy:nodeId="269">
    <graphics x="-1050.9230002453257" z="0.0" y="-1174.5569691580201"/>
  </node>
  <node id="32977" label="WP_159770677_3" cy:nodeId="29997">
    <graphics x="2137.169557775699" z="0.0" y="-1317.9475890129859"/>
  </node>
  <node id="32398" label="WP_006622760_11" cy:nodeId="32045">
    <graphics x="-965.5802365430206" z="0.0" y="2701.263605363539"/>
  </node>
  <node id="33820" label="TRT88208_1" cy:nodeId="333">
    <graphics x="-971.8029507761519" z="0.0" y="-1314.1163219238113"/>
  </node>
  <node id="32377" label="WP_131089594_4" cy:nodeId="32077">
    <graphics x="164.5942858568817" z="0.0" y="2808.985773332289"/>
  </node>
  <node id="32334" label="WP_086837411_2" cy:nodeId="32141">
    <graphics x="2330.9782351366666" z="0.0" y="2701.263605363539"/>
  </node>
  <node id="32313" label="WP_131076036_2" cy:nodeId="32173">
    <graphics x="-762.5627843030304" z="0.0" y="3016.707941301039"/>
  </node>
  <node id="33765" label="WP_109595189_5" cy:nodeId="461">
    <graphics x="-991.5203443520811" z="0.0" y="-234.75731937404518"/>
  </node>
  <node id="33519" label="WP_015113151_6" cy:nodeId="1485">
    <graphics x="-340.5222941511014" z="0.0" y="-1278.0871904369158"/>
  </node>
  <node id="32772" label="WP_122818055_3" cy:nodeId="31181">
    <graphics x="-566.2888699658722" z="0.0" y="1234.3092310501847"/>
  </node>
  <node id="33749" label="WP_133890759_2" cy:nodeId="493">
    <graphics x="-913.896013630693" z="0.0" y="-39.03197320833581"/>
  </node>
  <node id="33132" label="WP_015207763_4" cy:nodeId="17901">
    <graphics x="-904.0076606523643" z="0.0" y="-1123.570685009199"/>
  </node>
  <node id="32951" label="WP_096681247_9" cy:nodeId="30189">
    <graphics x="-912.9953938611359" z="0.0" y="863.7331640793595"/>
  </node>
  <node id="32270" label="WP_103138325_6" cy:nodeId="32237">
    <graphics x="1403.8211649767547" z="0.0" y="2908.985773332289"/>
  </node>
  <node id="32941" label="WP_096589596_11" cy:nodeId="30221">
    <graphics x="-1633.7348853991962" z="0.0" y="592.7054352280886"/>
  </node>
  <node id="33108" label="WP_144873874_1" cy:nodeId="27181">
    <graphics x="-853.1229834546965" z="0.0" y="-936.6945922647892"/>
  </node>
  <node id="33063" label="WP_124970176_8" cy:nodeId="29229">
    <graphics x="837.6087610458278" z="0.0" y="-1371.7446700345224"/>
  </node>
  <node id="33704" label="WP_103136595_3" cy:nodeId="621">
    <graphics x="-694.7868280122343" z="0.0" y="-1256.6814836696901"/>
  </node>
  <node id="33695" label="WP_096537472_5" cy:nodeId="653">
    <graphics x="-893.0230066584471" z="0.0" y="-1233.1469662289198"/>
  </node>
  <node id="32705" label="WP_006622760_5" cy:nodeId="31405">
    <graphics x="1492.1579807607538" z="0.0" y="1237.3796935199498"/>
  </node>
  <node id="33463" label="WP_159770677_1" cy:nodeId="1837">
    <graphics x="-897.9975081311067" z="0.0" y="-345.5192724698343"/>
  </node>
  <node id="33266" label="WP_115965582_2" cy:nodeId="5965">
    <graphics x="-944.9700608091305" z="0.0" y="116.27021656973503"/>
  </node>
  <node id="32903" label="WP_161634174_2" cy:nodeId="30541">
    <graphics x="10.03636771890956" z="0.0" y="741.8300316027901"/>
  </node>
  <node id="33625" label="RCJ40850_2" cy:nodeId="877">
    <graphics x="-943.6630295203347" z="0.0" y="-1092.6197160551271"/>
  </node>
  <node id="33178" label="WP_019501037_2" cy:nodeId="11117">
    <graphics x="-840.3110194120371" z="0.0" y="-1311.8205724092147"/>
  </node>
  <node id="32894" label="WP_044449646_1" cy:nodeId="30573">
    <graphics x="198.02980643961268" z="0.0" y="829.6248619250557"/>
  </node>
  <node id="32634" label="WP_068252194_3" cy:nodeId="31597">
    <graphics x="-233.68177473931937" z="0.0" y="1849.8447899398973"/>
  </node>
  <node id="33163" label="WP_017581465_3" cy:nodeId="12173">
    <graphics x="-690.7272242258414" z="0.0" y="-235.83308103614283"/>
  </node>
  <node id="33230" label="WP_068385845_1" cy:nodeId="7085">
    <graphics x="-956.7652075698413" z="0.0" y="-990.4981065609784"/>
  </node>
  <node id="32888" label="WP_137248807_4" cy:nodeId="30637">
    <graphics x="418.5623992130502" z="0.0" y="570.2214653186104"/>
  </node>
  <node id="32592" label="WP_096589596_9" cy:nodeId="31693">
    <graphics x="167.31058336442717" z="0.0" y="2013.27446193571"/>
  </node>
  <node id="32578" label="WP_106331017_3" cy:nodeId="31725">
    <graphics x="749.1583921256577" z="0.0" y="2012.4823731842084"/>
  </node>
  <node id="32562" label="WP_053706403_1" cy:nodeId="31758">
    <graphics x="1936.722900563768" z="0.0" y="1912.6283082428022"/>
  </node>
  <node id="33009" label="WP_168643398_2" cy:nodeId="29742">
    <graphics x="1335.883434507741" z="0.0" y="-1417.3147455464548"/>
  </node>
  <node id="32545" label="WP_103811802_1" cy:nodeId="31790">
    <graphics x="-1274.173709977469" z="0.0" y="2181.642549760512"/>
  </node>
  <node id="33946" label="WP_096536886_5" cy:nodeId="78">
    <graphics x="-682.1515967423034" z="0.0" y="-1207.3543095152306"/>
  </node>
  <node id="32529" label="WP_082604641_1" cy:nodeId="31822">
    <graphics x="-72.9148636945099" z="0.0" y="2247.844827897719"/>
  </node>
  <node id="33930" label="WP_099071810_1" cy:nodeId="110">
    <graphics x="-621.4988343809084" z="0.0" y="-1235.7178936515882"/>
  </node>
  <node id="33363" label="WP_079151368_1" cy:nodeId="3182">
    <graphics x="-664.0544084898074" z="0.0" y="31.388390611880283"/>
  </node>
  <node id="33144" label="WP_121024930_1" cy:nodeId="15470">
    <graphics x="-679.1023891184823" z="0.0" y="-256.88481016611934"/>
  </node>
  <node id="33914" label="CEJ45116_1" cy:nodeId="142">
    <graphics x="-787.0882790118626" z="0.0" y="-1256.5547746809495"/>
  </node>
  <node id="33556" label="WP_167725682_4" cy:nodeId="1166">
    <graphics x="-506.89050358624013" z="0.0" y="-1336.4376164924067"/>
  </node>
  <node id="33004" label="TVP62740_5" cy:nodeId="29838">
    <graphics x="1678.3464309905905" z="0.0" y="-1302.346514345283"/>
  </node>
  <node id="32496" label="WP_073619916_1" cy:nodeId="31886">
    <graphics x="2155.087108503976" z="0.0" y="2161.6212484909806"/>
  </node>
  <node id="33898" label="BAZ29283_3" cy:nodeId="174">
    <graphics x="-694.623448277503" z="0.0" y="-1212.4867032181535"/>
  </node>
  <node id="32832" label="WP_083744359_1" cy:nodeId="30894">
    <graphics x="-1684.2318316488634" z="0.0" y="1260.4622967908067"/>
  </node>
  <node id="32479" label="WP_168880029_3" cy:nodeId="31918">
    <graphics x="-1035.3094502576203" z="0.0" y="2460.83651185768"/>
  </node>
  <node id="33882" label="WP_089091039_3" cy:nodeId="206">
    <graphics x="-748.4778341948108" z="0.0" y="-1211.6261578633746"/>
  </node>
  <node id="32826" label="GFH39519_2" cy:nodeId="30926">
    <graphics x="2397.0895804651145" z="0.0" y="765.2201345313067"/>
  </node>
  <node id="33866" label="WP_057178590_8" cy:nodeId="238">
    <graphics x="-349.4921941966453" z="0.0" y="-1305.8931125115666"/>
  </node>
  <node id="32440" label="WP_006197379_1" cy:nodeId="31982">
    <graphics x="1124.0314082018524" z="0.0" y="2440.8152105881486"/>
  </node>
  <node id="32419" label="WP_087103312_2" cy:nodeId="32014">
    <graphics x="2254.2059306017545" z="0.0" y="2548.5373785568986"/>
  </node>
  <node id="33835" label="WP_070396036_3" cy:nodeId="302">
    <graphics x="-923.8370625961968" z="0.0" y="-1297.6947904234"/>
  </node>
  <node id="32976" label="WP_158686821_3" cy:nodeId="29998">
    <graphics x="2221.0671713010897" z="0.0" y="-1289.806290957337"/>
  </node>
  <node id="33532" label="WP_155358788_3" cy:nodeId="1358">
    <graphics x="-585.0370977260983" z="0.0" y="-132.99453590295778"/>
  </node>
  <node id="32376" label="WP_061955677_6" cy:nodeId="32078">
    <graphics x="167.61173809687193" z="0.0" y="2701.263605363539"/>
  </node>
  <node id="33804" label="WP_155358788_2" cy:nodeId="366">
    <graphics x="-594.2612725130394" z="0.0" y="-119.98103233785403"/>
  </node>
  <node id="32355" label="WP_061955677_3" cy:nodeId="32110">
    <graphics x="1297.7862604967743" z="0.0" y="2808.985773332289"/>
  </node>
  <node id="33781" label="WP_049976882_1" cy:nodeId="430">
    <graphics x="-983.8299475298488" z="0.0" y="-25.2151805095842"/>
  </node>
  <node id="32312" label="WP_156170590_2" cy:nodeId="32174">
    <graphics x="-759.5453320630402" z="0.0" y="2908.985773332289"/>
  </node>
  <node id="33211" label="WP_015197629_2" cy:nodeId="7630">
    <graphics x="-1333.4039234639206" z="0.0" y="-1087.0740189207897"/>
  </node>
  <node id="32291" label="WP_088888836_2" cy:nodeId="32206">
    <graphics x="370.62919033686217" z="0.0" y="3016.707941301039"/>
  </node>
  <node id="32762" label="WP_162197196_2" cy:nodeId="31214">
    <graphics x="-289.7772732861847" z="0.0" y="1166.7255709244523"/>
  </node>
  <node id="33733" label="WP_053706403_3" cy:nodeId="526">
    <graphics x="-1061.2212140737913" z="0.0" y="-117.2057603638739"/>
  </node>
  <node id="33504" label="WP_096688632_5" cy:nodeId="1550">
    <graphics x="-927.4695686878683" z="0.0" y="-1294.8132033574109"/>
  </node>
  <node id="33246" label="WP_010996095_1" cy:nodeId="6670">
    <graphics x="-733.5888336474595" z="0.0" y="-1249.0510503818111"/>
  </node>
  <node id="33715" label="WP_051700182_1" cy:nodeId="590">
    <graphics x="-1062.2199518032369" z="0.0" y="-69.7757182590781"/>
  </node>
  <node id="32735" label="WP_096537472_1" cy:nodeId="31310">
    <graphics x="1843.2031571735188" z="0.0" y="1189.8570590699699"/>
  </node>
  <node id="33389" label="WP_096681247_4" cy:nodeId="2670">
    <graphics x="-692.002024076442" z="0.0" y="-1129.6992998072708"/>
  </node>
  <node id="33150" label="WP_114054648_1" cy:nodeId="14958">
    <graphics x="-931.2945721898802" z="0.0" y="-275.66384358404923"/>
  </node>
  <node id="32725" label="WP_168465654_5" cy:nodeId="31342">
    <graphics x="2182.0004225612897" z="0.0" y="1171.8108548021573"/>
  </node>
  <node id="33484" label="WP_015078657_2" cy:nodeId="1678">
    <graphics x="-747.5203800126033" z="0.0" y="-1302.3599219619243"/>
  </node>
  <node id="33685" label="RCJ14929_1" cy:nodeId="686">
    <graphics x="-736.2581624814479" z="0.0" y="-1127.8716649242158"/>
  </node>
  <node id="33271" label="WP_103136595_1" cy:nodeId="5806">
    <graphics x="-765.891233999369" z="0.0" y="-1229.804258468346"/>
  </node>
  <node id="32704" label="WP_006619051_2" cy:nodeId="31406">
    <graphics x="1450.146048387707" z="0.0" y="1164.1593642352818"/>
  </node>
  <node id="32694" label="WP_030452416_2" cy:nodeId="31438">
    <graphics x="491.29027701468476" z="0.0" y="1570.8818665883284"/>
  </node>
  <node id="32683" label="WP_138498765_2" cy:nodeId="31470">
    <graphics x="-260.81293714673535" z="0.0" y="1507.7078228766873"/>
  </node>
  <node id="33321" label="WP_072808981_1" cy:nodeId="3854">
    <graphics x="-734.4581527594939" z="0.0" y="-353.71137250113566"/>
  </node>
  <node id="33094" label="WP_168491601_1" cy:nodeId="28430">
    <graphics x="373.0203172897243" z="0.0" y="-1338.7445245991892"/>
  </node>
  <node id="33025" label="AVH79607_1" cy:nodeId="29454">
    <graphics x="1326.2189752792244" z="0.0" y="-1444.5570245991892"/>
  </node>
  <node id="32669" label="WP_116947187_1" cy:nodeId="31502">
    <graphics x="-829.0581581080805" z="0.0" y="1672.4077175951259"/>
  </node>
  <node id="33646" label="PZN41733_3" cy:nodeId="814">
    <graphics x="-1119.4113552877332" z="0.0" y="-93.72056782138546"/>
  </node>
  <node id="33078" label="TVP62142_1" cy:nodeId="28462">
    <graphics x="361.61461660613054" z="0.0" y="-1450.2431055318063"/>
  </node>
  <node id="32658" label="TDT36016_4" cy:nodeId="31534">
    <graphics x="-1596.4810894517461" z="0.0" y="1646.7344108870798"/>
  </node>
  <node id="33638" label="WP_060892878_4" cy:nodeId="846">
    <graphics x="-813.443383843719" z="0.0" y="-108.2919041519988"/>
  </node>
  <node id="33374" label="WP_104258544_1" cy:nodeId="2926">
    <graphics x="-1124.89790029343" z="0.0" y="-292.1816110306305"/>
  </node>
  <node id="32633" label="WP_068208510_3" cy:nodeId="31598">
    <graphics x="-252.01847517877243" z="0.0" y="1957.9840111313035"/>
  </node>
  <node id="33612" label="WP_124970176_11" cy:nodeId="910">
    <graphics x="-1006.0787829919998" z="0.0" y="-1228.6111846341116"/>
  </node>
  <node id="33117" label="WP_089505437_1" cy:nodeId="23438">
    <graphics x="-616.5189055786697" z="0.0" y="46.637077357701315"/>
  </node>
  <node id="32619" label="WP_008180360_5" cy:nodeId="31630">
    <graphics x="1488.2379659833869" z="0.0" y="1680.958804020907"/>
  </node>
  <node id="33600" label="WP_071107270_2" cy:nodeId="942">
    <graphics x="-942.3763333277009" z="0.0" y="-1180.6092883564595"/>
  </node>
  <node id="32606" label="BBC15200_2" cy:nodeId="31662">
    <graphics x="-543.6910765709238" z="0.0" y="1944.0175732469813"/>
  </node>
  <node id="33449" label="WP_159425899_3" cy:nodeId="1998">
    <graphics x="-1199.475021793938" z="0.0" y="-104.51520892527199"/>
  </node>
  <node id="32561" label="WP_055421432_1" cy:nodeId="31759">
    <graphics x="1953.364975148729" z="0.0" y="2019.1153687896772"/>
  </node>
  <node id="33577" label="WP_141936425_3" cy:nodeId="1071">
    <graphics x="-847.0985367591137" z="0.0" y="-58.671605995774854"/>
  </node>
  <node id="33225" label="WP_022929317_2" cy:nodeId="7215">
    <graphics x="-814.0131865294179" z="0.0" y="-221.55123594878273"/>
  </node>
  <node id="32859" label="WP_027975917_3" cy:nodeId="30767">
    <graphics x="1584.2831896669522" z="0.0" y="544.3998074270473"/>
  </node>
  <node id="32528" label="WP_079291565_2" cy:nodeId="31823">
    <graphics x="-138.96964274724428" z="0.0" y="2161.6212484909806"/>
  </node>
  <node id="33362" label="ANI93503_5" cy:nodeId="3183">
    <graphics x="-890.5768052407301" z="0.0" y="36.12969191677385"/>
  </node>
  <node id="32844" label="WP_164312175_1" cy:nodeId="30831">
    <graphics x="1354.4870823518636" z="0.0" y="714.4322787847037"/>
  </node>
  <node id="33431" label="WP_015193424_3" cy:nodeId="2191">
    <graphics x="-851.3441925777869" z="0.0" y="-1109.4643250600964"/>
  </node>
  <node id="32495" label="WP_096592804_1" cy:nodeId="31887">
    <graphics x="2261.8474291674283" z="0.0" y="2176.368379838637"/>
  </node>
  <node id="33426" label="WP_015189896_2" cy:nodeId="2223">
    <graphics x="-972.3455496811937" z="0.0" y="-1035.9347422433964"/>
  </node>
  <node id="32825" label="WP_104779873_2" cy:nodeId="30927">
    <graphics x="2390.5132846124534" z="0.0" y="664.1523549902904"/>
  </node>
  <node id="32461" label="BAZ86949_2" cy:nodeId="31951">
    <graphics x="90.83943356195982" z="0.0" y="2548.5373785568986"/>
  </node>
  <node id="33128" label="WP_027402982_6" cy:nodeId="18671">
    <graphics x="-364.3803744549217" z="0.0" y="-1012.4828943657519"/>
  </node>
  <node id="33850" label="WP_015216084_5" cy:nodeId="271">
    <graphics x="-825.2085993638316" z="0.0" y="-1264.374986051134"/>
  </node>
  <node id="33540" label="WP_171977306_3" cy:nodeId="1295">
    <graphics x="-946.5204036259372" z="0.0" y="-1319.9807098558701"/>
  </node>
  <node id="33068" label="WP_096659345_1" cy:nodeId="28943">
    <graphics x="391.26427480925554" z="0.0" y="-1441.6665521870798"/>
  </node>
  <node id="32814" label="WP_044377254_2" cy:nodeId="30991">
    <graphics x="1803.2069944619013" z="0.0" y="665.1012323398805"/>
  </node>
  <node id="32418" label="WP_067598320_2" cy:nodeId="32015">
    <graphics x="2257.2233828417448" z="0.0" y="2440.8152105881486"/>
  </node>
  <node id="33536" label="WP_019496925_3" cy:nodeId="1327">
    <graphics x="-1024.660571412095" z="0.0" y="-1175.9623686792509"/>
  </node>
  <node id="33213" label="WP_161481447_6" cy:nodeId="7471">
    <graphics x="-279.35274212134505" z="0.0" y="-162.2480661725629"/>
  </node>
  <node id="32397" label="WP_155752488_3" cy:nodeId="32047">
    <graphics x="-865.5802365430206" z="0.0" y="2808.985773332289"/>
  </node>
  <node id="33819" label="WP_138499827_5" cy:nodeId="335">
    <graphics x="-1015.0412490994484" z="0.0" y="-1273.2392076943831"/>
  </node>
  <node id="33416" label="WP_131089594_1" cy:nodeId="2415">
    <graphics x="-970.4430973298374" z="0.0" y="-347.24901057125567"/>
  </node>
  <node id="32354" label="WP_131089594_3" cy:nodeId="32111">
    <graphics x="1300.8037127367645" z="0.0" y="2701.263605363539"/>
  </node>
  <node id="32333" label="AFY52807_6" cy:nodeId="32143">
    <graphics x="-1792.7373067029328" z="0.0" y="3016.707941301039"/>
  </node>
  <node id="33764" label="WP_157846946_1" cy:nodeId="463">
    <graphics x="-1083.6181346124733" z="0.0" y="-190.62728016489453"/>
  </node>
  <node id="33518" label="WP_096559014_7" cy:nodeId="1487">
    <graphics x="-393.6107531896845" z="0.0" y="-1225.8020357489183"/>
  </node>
  <node id="32965" label="WP_015127932_6" cy:nodeId="30159">
    <graphics x="-1229.7022877820343" z="0.0" y="820.2317011429582"/>
  </node>
  <node id="32771" label="WP_084520237_3" cy:nodeId="31183">
    <graphics x="-481.30318271001283" z="0.0" y="1257.301754243544"/>
  </node>
  <node id="32290" label="RNJ67588_1" cy:nodeId="32207">
    <graphics x="373.6466425768524" z="0.0" y="2908.985773332289"/>
  </node>
  <node id="33209" label="WP_093831028_1" cy:nodeId="7663">
    <graphics x="-710.5328659341549" z="0.0" y="-71.145245825383"/>
  </node>
  <node id="32950" label="WP_011321056_6" cy:nodeId="30191">
    <graphics x="-862.0833760388703" z="0.0" y="950.1476786209855"/>
  </node>
  <node id="32269" label="WP_079189213_3" cy:nodeId="32239">
    <graphics x="1503.8211649767547" z="0.0" y="3016.707941301039"/>
  </node>
  <node id="32940" label="WP_012595952_4" cy:nodeId="30223">
    <graphics x="-1789.5321723865009" z="0.0" y="558.1849884507449"/>
  </node>
  <node id="32753" label="WP_071383933_7" cy:nodeId="31247">
    <graphics x="44.524820219674666" z="0.0" y="1171.655613191298"/>
  </node>
  <node id="33062" label="WP_096679519_3" cy:nodeId="29231">
    <graphics x="829.5973779891872" z="0.0" y="-1415.987410665626"/>
  </node>
  <node id="32744" label="WP_135072443_2" cy:nodeId="31279">
    <graphics x="592.6092547085375" z="0.0" y="1267.8740676085054"/>
  </node>
  <node id="33703" label="WP_015139846_1" cy:nodeId="623">
    <graphics x="-656.2816331371716" z="0.0" y="-1187.1420377849315"/>
  </node>
  <node id="32724" label="WP_168645325_2" cy:nodeId="31343">
    <graphics x="2145.9542342067975" z="0.0" y="1251.3703030443448"/>
  </node>
  <node id="33323" label="WP_060892878_3" cy:nodeId="3759">
    <graphics x="-950.9763115614412" z="0.0" y="-161.13829127859825"/>
  </node>
  <node id="33676" label="WP_087539234_6" cy:nodeId="719">
    <graphics x="-761.5362157522172" z="0.0" y="-1228.3989391894609"/>
  </node>
  <node id="33665" label="RCJ19623_1" cy:nodeId="751">
    <graphics x="-971.8922858508583" z="0.0" y="-1340.605180743052"/>
  </node>
  <node id="33462" label="WP_126393842_1" cy:nodeId="1839">
    <graphics x="-788.2371578737741" z="0.0" y="-340.62375273657995"/>
  </node>
  <node id="33205" label="WP_099071810_3" cy:nodeId="7983">
    <graphics x="-651.7138793311017" z="0.0" y="-1284.9171854003396"/>
  </node>
  <node id="32902" label="WP_159037419_1" cy:nodeId="30543">
    <graphics x="112.36913139078456" z="0.0" y="841.9416954211495"/>
  </node>
  <node id="32647" label="WP_141936425_5" cy:nodeId="31567">
    <graphics x="-1845.8668188821316" z="0.0" y="1695.9711635275569"/>
  </node>
  <node id="33624" label="AVH79535_2" cy:nodeId="879">
    <graphics x="-854.9802919836646" z="0.0" y="-1330.2449749745026"/>
  </node>
  <node id="33159" label="WP_083744359_3" cy:nodeId="13167">
    <graphics x="-832.4188360894558" z="0.0" y="-72.73502140030044"/>
  </node>
  <node id="33452" label="WP_155746097_1" cy:nodeId="1967">
    <graphics x="-896.9005263931748" z="0.0" y="-1290.353589111084"/>
  </node>
  <node id="32887" label="WP_161483240_4" cy:nodeId="30639">
    <graphics x="488.91790611002284" z="0.0" y="647.4729301623604"/>
  </node>
  <node id="32605" label="WP_046417231_2" cy:nodeId="31663">
    <graphics x="-415.64723806994704" z="0.0" y="1970.615153203036"/>
  </node>
  <node id="33442" label="WP_015216084_8" cy:nodeId="2096">
    <graphics x="-871.6554780936266" z="0.0" y="-1319.3110067340492"/>
  </node>
  <node id="33945" label="WP_015212417_1" cy:nodeId="80">
    <graphics x="-785.1827316319391" z="0.0" y="-1226.84500343593"/>
  </node>
  <node id="33929" label="WP_009343975_1" cy:nodeId="112">
    <graphics x="-739.4318219632546" z="0.0" y="-1153.9324475926876"/>
  </node>
  <node id="33561" label="WP_015127932_4" cy:nodeId="1136">
    <graphics x="-689.2401757815092" z="0.0" y="-1276.051617768553"/>
  </node>
  <node id="32511" label="WP_165975342_5" cy:nodeId="31856">
    <graphics x="1128.3460749498993" z="0.0" y="2161.6212484909806"/>
  </node>
  <node id="33913" label="OBQ01900_3" cy:nodeId="144">
    <graphics x="-834.2524487771142" z="0.0" y="-1225.3077550436317"/>
  </node>
  <node id="33555" label="WP_104296401_5" cy:nodeId="1168">
    <graphics x="-917.1406460686928" z="0.0" y="-295.6659169912806"/>
  </node>
  <node id="33003" label="WP_057178590_6" cy:nodeId="29840">
    <graphics x="1817.1964380477805" z="0.0" y="-1450.6440607320017"/>
  </node>
  <node id="33897" label="WP_162399505_4" cy:nodeId="176">
    <graphics x="-678.062588609027" z="0.0" y="-1363.9451072777335"/>
  </node>
  <node id="33881" label="WP_015155263_3" cy:nodeId="208">
    <graphics x="-770.7079751437118" z="0.0" y="-1143.3858302194456"/>
  </node>
  <node id="33543" label="WP_096664869_2" cy:nodeId="1232">
    <graphics x="-693.6381622807526" z="0.0" y="-1317.6999975427932"/>
  </node>
  <node id="33282" label="WP_062295185_7" cy:nodeId="5328">
    <graphics x="-312.5692883237201" z="0.0" y="-1232.67688061485"/>
  </node>
  <node id="32460" label="WP_137908690_1" cy:nodeId="31952">
    <graphics x="93.85688580195006" z="0.0" y="2440.8152105881486"/>
  </node>
  <node id="33865" label="BAZ29283_7" cy:nodeId="240">
    <graphics x="-455.831014241004" z="0.0" y="-1379.0169823556969"/>
  </node>
  <node id="33256" label="AVH79628_5" cy:nodeId="6384">
    <graphics x="-975.1946498334571" z="0.0" y="-1217.142636518303"/>
  </node>
  <node id="32439" label="WP_096604516_1" cy:nodeId="31984">
    <graphics x="1224.0314082018524" z="0.0" y="2548.5373785568986"/>
  </node>
  <node id="32813" label="WP_096622718_2" cy:nodeId="30992">
    <graphics x="1777.1068968056513" z="0.0" y="593.875036050818"/>
  </node>
  <node id="33834" label="WP_127086205_3" cy:nodeId="304">
    <graphics x="-1019.9765738697886" z="0.0" y="-1273.6341210965945"/>
  </node>
  <node id="32975" label="WP_159688203_2" cy:nodeId="30000">
    <graphics x="2157.9599630491366" z="0.0" y="-1282.600709292298"/>
  </node>
  <node id="32396" label="WP_017743137_4" cy:nodeId="32048">
    <graphics x="-862.5627843030304" z="0.0" y="2701.263605363539"/>
  </node>
  <node id="32375" label="WP_168880027_5" cy:nodeId="32080">
    <graphics x="267.61173809687193" z="0.0" y="2808.985773332289"/>
  </node>
  <node id="33803" label="WP_062339008_4" cy:nodeId="368">
    <graphics x="-509.5792767845205" z="0.0" y="-40.299505559005894"/>
  </node>
  <node id="33415" label="WP_096285992_1" cy:nodeId="2416">
    <graphics x="-1021.8446739058352" z="0.0" y="-341.7239470292468"/>
  </node>
  <node id="33792" label="WP_015207767_4" cy:nodeId="400">
    <graphics x="-894.5607888100484" z="0.0" y="-1131.981007811224"/>
  </node>
  <node id="33407" label="WP_006195640_1" cy:nodeId="2448">
    <graphics x="-766.145085630385" z="0.0" y="-1228.2160947265982"/>
  </node>
  <node id="33248" label="WP_012409787_5" cy:nodeId="6544">
    <graphics x="-876.7718625484548" z="0.0" y="-1243.2850089693854"/>
  </node>
  <node id="32332" label="RCJ25607_1" cy:nodeId="32144">
    <graphics x="-1789.7198544629425" z="0.0" y="2908.985773332289"/>
  </node>
  <node id="33780" label="WP_167721203_10" cy:nodeId="432">
    <graphics x="-1109.422875590186" z="0.0" y="-1364.3012022663204"/>
  </node>
  <node id="33405" label="RCJ30949_3" cy:nodeId="2480">
    <graphics x="-677.1046407980898" z="0.0" y="-1230.0474383924336"/>
  </node>
  <node id="32311" label="WP_045296661_3" cy:nodeId="32176">
    <graphics x="-659.5453320630402" z="0.0" y="3016.707941301039"/>
  </node>
  <node id="32964" label="WP_114082527_8" cy:nodeId="30160">
    <graphics x="-1099.5532532819122" z="0.0" y="895.285143144301"/>
  </node>
  <node id="33748" label="WP_145487439_1" cy:nodeId="496">
    <graphics x="-1009.5739660294137" z="0.0" y="-94.23262180694158"/>
  </node>
  <node id="33509" label="RCJ19623_2" cy:nodeId="1520">
    <graphics x="-1006.637597120686" z="0.0" y="-1075.8672241427882"/>
  </node>
  <node id="32761" label="WP_106743417_1" cy:nodeId="31216">
    <graphics x="-285.8306180127472" z="0.0" y="1225.3235962464128"/>
  </node>
  <node id="32268" label="WP_145487439_3" cy:nodeId="32240">
    <graphics x="1506.838617216745" z="0.0" y="2908.985773332289"/>
  </node>
  <node id="33732" label="AWS47415_3" cy:nodeId="528">
    <graphics x="-1092.7203463537965" z="0.0" y="-106.87111219487886"/>
  </node>
  <node id="33503" label="WP_106371152_5" cy:nodeId="1552">
    <graphics x="-899.8676166209906" z="0.0" y="-1279.7109568578487"/>
  </node>
  <node id="33151" label="WP_129307298_1" cy:nodeId="14864">
    <graphics x="-555.5717505399018" z="0.0" y="49.25841757913568"/>
  </node>
  <node id="33723" label="WP_158686821_1" cy:nodeId="560">
    <graphics x="-871.5524463679402" z="0.0" y="-43.37155141731503"/>
  </node>
  <node id="33061" label="RCJ40334_1" cy:nodeId="29232">
    <graphics x="776.2790796493434" z="0.0" y="-1310.587107778663"/>
  </node>
  <node id="32743" label="WP_055421432_3" cy:nodeId="31280">
    <graphics x="501.56398188138905" z="0.0" y="1151.426107708603"/>
  </node>
  <node id="33714" label="PZN41733_2" cy:nodeId="592">
    <graphics x="-1019.6666742129244" z="0.0" y="-107.53976794824737"/>
  </node>
  <node id="33395" label="WP_096620064_2" cy:nodeId="2640">
    <graphics x="-201.78515029538482" z="0.0" y="-1413.3490759009908"/>
  </node>
  <node id="32734" label="BAZ33272_3" cy:nodeId="31312">
    <graphics x="1769.0079972614094" z="0.0" y="1189.1231418336417"/>
  </node>
  <node id="32703" label="WP_109006830_2" cy:nodeId="31408">
    <graphics x="1554.7021091787226" z="0.0" y="1153.743279945731"/>
  </node>
  <node id="32693" label="WP_062348671_2" cy:nodeId="31440">
    <graphics x="591.9592223271849" z="0.0" y="1649.6934205434065"/>
  </node>
  <node id="33320" label="WP_072713661_1" cy:nodeId="3856">
    <graphics x="-756.5509735824537" z="0.0" y="-418.36344124741197"/>
  </node>
  <node id="33093" label="WP_017320198_1" cy:nodeId="28432">
    <graphics x="420.42360708464616" z="0.0" y="-1414.0413080464548"/>
  </node>
  <node id="33024" label="WP_096679519_1" cy:nodeId="29456">
    <graphics x="1268.8231012557874" z="0.0" y="-1479.2927271138376"/>
  </node>
  <node id="32668" label="WP_069110514_1" cy:nodeId="31504">
    <graphics x="-750.2392799342524" z="0.0" y="1675.7643002367274"/>
  </node>
  <node id="33077" label="BAZ15600_2" cy:nodeId="28464">
    <graphics x="416.72719595183366" z="0.0" y="-1326.0710626851267"/>
  </node>
  <node id="32657" label="WP_051642643_2" cy:nodeId="31536">
    <graphics x="-1545.516040184931" z="0.0" y="1705.5271164229684"/>
  </node>
  <node id="32632" label="KKT87137_2" cy:nodeId="31600">
    <graphics x="-334.6170011797485" z="0.0" y="1885.649675804155"/>
  </node>
  <node id="33611" label="WP_012597836_6" cy:nodeId="912">
    <graphics x="-980.783227622828" z="0.0" y="-1112.6935275672183"/>
  </node>
  <node id="32880" label="WP_030452416_3" cy:nodeId="30672">
    <graphics x="408.87621146890956" z="0.0" y="862.7332451037666"/>
  </node>
  <node id="32591" label="WP_167721203_7" cy:nodeId="31696">
    <graphics x="133.91385484880266" z="0.0" y="1886.8066503512389"/>
  </node>
  <node id="33593" label="WP_138499068_5" cy:nodeId="1008">
    <graphics x="-650.1737822423158" z="0.0" y="-1325.2896061308745"/>
  </node>
  <node id="32577" label="WP_015140719_3" cy:nodeId="31728">
    <graphics x="915.3250715079819" z="0.0" y="1912.6283082428022"/>
  </node>
  <node id="32560" label="WP_035905443_2" cy:nodeId="31761">
    <graphics x="2037.2813340964829" z="0.0" y="1951.439770645146"/>
  </node>
  <node id="33576" label="WP_054237388_3" cy:nodeId="1073">
    <graphics x="-878.4537129296449" z="0.0" y="-139.81135803563555"/>
  </node>
  <node id="32858" label="WP_068252194_1" cy:nodeId="30769">
    <graphics x="1549.5165375597135" z="0.0" y="675.3593029714809"/>
  </node>
  <node id="32544" label="WP_031017311_3" cy:nodeId="31793">
    <graphics x="-1174.173709977469" z="0.0" y="2161.6212484909806"/>
  </node>
  <node id="33439" label="WP_163699711_3" cy:nodeId="2129">
    <graphics x="-889.5763424096211" z="0.0" y="-902.3323045852765"/>
  </node>
  <node id="33157" label="WP_051436687_2" cy:nodeId="13393">
    <graphics x="-852.5844813338707" z="0.0" y="73.98039152981929"/>
  </node>
  <node id="32527" label="AGP61345_2" cy:nodeId="31825">
    <graphics x="-18.403083909353654" z="0.0" y="2340.8152105881486"/>
  </node>
  <node id="33361" label="WP_051859750_2" cy:nodeId="3185">
    <graphics x="-797.543995498819" z="0.0" y="88.6880918177425"/>
  </node>
  <node id="32843" label="WP_016570561_3" cy:nodeId="30833">
    <graphics x="1263.6932896272542" z="0.0" y="603.740216406774"/>
  </node>
  <node id="32510" label="WP_165975342_4" cy:nodeId="31857">
    <graphics x="1163.9395846239715" z="0.0" y="2263.3633749558244"/>
  </node>
  <node id="33554" label="WP_142936832_1" cy:nodeId="1169">
    <graphics x="-962.1077670166494" z="0.0" y="-432.5377807710091"/>
  </node>
  <node id="33139" label="WP_071383933_3" cy:nodeId="16529">
    <graphics x="-841.7742549700423" z="0.0" y="-117.1589233302864"/>
  </node>
  <node id="32494" label="WP_167727925_1" cy:nodeId="31889">
    <graphics x="2195.680749785104" z="0.0" y="2261.475313432387"/>
  </node>
  <node id="32478" label="WP_093601002_6" cy:nodeId="31921">
    <graphics x="517.1588061427973" z="0.0" y="1911.4712238111074"/>
  </node>
  <node id="32824" label="WP_051727186_2" cy:nodeId="30929">
    <graphics x="2438.5803565271262" z="0.0" y="733.3165471899972"/>
  </node>
  <node id="32438" label="WP_086837411_1" cy:nodeId="31985">
    <graphics x="1227.0488604418426" z="0.0" y="2440.8152105881486"/>
  </node>
  <node id="33849" label="WP_167725682_2" cy:nodeId="273">
    <graphics x="-709.0475206061087" z="0.0" y="-1214.8700765575811"/>
  </node>
  <node id="32417" label="WP_006195640_3" cy:nodeId="32017">
    <graphics x="2357.2233828417448" z="0.0" y="2548.5373785568986"/>
  </node>
  <node id="33818" label="WP_012409787_3" cy:nodeId="337">
    <graphics x="-1004.9389947898151" z="0.0" y="-1205.9653672782185"/>
  </node>
  <node id="32374" label="WP_018486514_2" cy:nodeId="32081">
    <graphics x="270.62919033686217" z="0.0" y="2701.263605363539"/>
  </node>
  <node id="32353" label="WP_010996620_4" cy:nodeId="32113">
    <graphics x="1400.8037127367645" z="0.0" y="2808.985773332289"/>
  </node>
  <node id="33779" label="WP_168643398_7" cy:nodeId="433">
    <graphics x="-1262.4216071781414" z="0.0" y="-1358.7201696593145"/>
  </node>
  <node id="32776" label="WP_096664869_7" cy:nodeId="31153">
    <graphics x="-1032.0526576112675" z="0.0" y="1161.4036613753608"/>
  </node>
  <node id="32310" label="KQP70226_3" cy:nodeId="32177">
    <graphics x="-656.52787982305" z="0.0" y="2908.985773332289"/>
  </node>
  <node id="33763" label="WP_051837683_5" cy:nodeId="465">
    <graphics x="-1092.1573855246763" z="0.0" y="-22.074792866979436"/>
  </node>
  <node id="33517" label="WP_138499068_8" cy:nodeId="1489">
    <graphics x="-476.0185954507026" z="0.0" y="-1232.4525196457578"/>
  </node>
  <node id="33133" label="WP_166282462_2" cy:nodeId="17873">
    <graphics x="-917.3158370250301" z="0.0" y="-1388.0684817416657"/>
  </node>
  <node id="32770" label="WP_115965582_1" cy:nodeId="31185">
    <graphics x="-418.21919833501283" z="0.0" y="1135.1620829178605"/>
  </node>
  <node id="32289" label="TVP63782_6" cy:nodeId="32209">
    <graphics x="473.6466425768524" z="0.0" y="3016.707941301039"/>
  </node>
  <node id="32949" label="WP_010996095_2" cy:nodeId="30193">
    <graphics x="-961.8564625867218" z="0.0" y="932.6429941727433"/>
  </node>
  <node id="32939" label="WP_086760950_10" cy:nodeId="30225">
    <graphics x="-1718.676261131618" z="0.0" y="532.415975999573"/>
  </node>
  <node id="32752" label="WP_054237388_8" cy:nodeId="31249">
    <graphics x="-57.35126315434877" z="0.0" y="1125.387790925673"/>
  </node>
  <node id="33044" label="WP_138498533_1" cy:nodeId="29297">
    <graphics x="680.5868799423122" z="0.0" y="-1440.020800710792"/>
  </node>
  <node id="32723" label="WP_015078657_5" cy:nodeId="31345">
    <graphics x="2059.3320494533787" z="0.0" y="1241.877932438876"/>
  </node>
  <node id="33242" label="AVH79662_2" cy:nodeId="6801">
    <graphics x="-1120.671709069604" z="0.0" y="-1319.8475162685097"/>
  </node>
  <node id="33291" label="BAY08128_3" cy:nodeId="4785">
    <graphics x="-1840.6136803153488" z="0.0" y="-1441.3611599136673"/>
  </node>
  <node id="32925" label="WP_105988468_5" cy:nodeId="30385">
    <graphics x="-208.49757545735997" z="0.0" y="658.8190452746651"/>
  </node>
  <node id="33645" label="WP_170198719_2" cy:nodeId="817">
    <graphics x="-1113.72366411899" z="0.0" y="51.83755900800443"/>
  </node>
  <node id="33461" label="WP_120754718_1" cy:nodeId="1841">
    <graphics x="-875.3545653116533" z="0.0" y="-395.5318525487444"/>
  </node>
  <node id="33637" label="WP_071107270_1" cy:nodeId="849">
    <graphics x="-823.1785753845757" z="0.0" y="-1126.0207866499147"/>
  </node>
  <node id="33265" label="WP_012868258_1" cy:nodeId="5969">
    <graphics x="-919.2872453714597" z="0.0" y="3.212988580483767"/>
  </node>
  <node id="33239" label="WP_096590410_2" cy:nodeId="6993">
    <graphics x="-936.202773902535" z="0.0" y="-1064.8801823263236"/>
  </node>
  <node id="32901" label="BBC15200_1" cy:nodeId="30545">
    <graphics x="129.6827910587533" z="0.0" y="784.5020897082588"/>
  </node>
  <node id="32646" label="WP_016495430_1" cy:nodeId="31569">
    <graphics x="-1389.1841241837005" z="0.0" y="2036.586888505288"/>
  </node>
  <node id="33623" label="WP_053455886_1" cy:nodeId="881">
    <graphics x="-937.1079977802863" z="0.0" y="-1147.7048480809497"/>
  </node>
  <node id="33373" label="WP_138666048_1" cy:nodeId="2929">
    <graphics x="-1153.935629973095" z="0.0" y="-252.84840583828068"/>
  </node>
  <node id="33236" label="WP_127086205_2" cy:nodeId="7025">
    <graphics x="-976.5621422190732" z="0.0" y="-1361.0209232052619"/>
  </node>
  <node id="32886" label="WP_062348671_3" cy:nodeId="30641">
    <graphics x="298.0298064396127" z="0.0" y="822.6566154650948"/>
  </node>
  <node id="32604" label="WP_039653089_2" cy:nodeId="31665">
    <graphics x="-466.30637198108" z="0.0" y="1893.2620648241298"/>
  </node>
  <node id="32576" label="WP_017655478_2" cy:nodeId="31729">
    <graphics x="1022.085392171434" z="0.0" y="1927.3754395904584"/>
  </node>
  <node id="33186" label="WP_105222244_1" cy:nodeId="10258">
    <graphics x="-971.6839712047647" z="0.0" y="-1300.0176313294976"/>
  </node>
  <node id="32543" label="WP_093908736_3" cy:nodeId="31794">
    <graphics x="-1157.531635392508" z="0.0" y="2268.1083090378556"/>
  </node>
  <node id="33944" label="WP_006195640_4" cy:nodeId="82">
    <graphics x="-711.9553066169315" z="0.0" y="-1160.1656219504255"/>
  </node>
  <node id="33928" label="TAE59458_3" cy:nodeId="114">
    <graphics x="-704.030731654871" z="0.0" y="-1286.1167582894739"/>
  </node>
  <node id="33184" label="AVH79535_5" cy:nodeId="10354">
    <graphics x="-929.4153112776391" z="0.0" y="-1494.0060055590764"/>
  </node>
  <node id="33912" label="WP_096536886_1" cy:nodeId="146">
    <graphics x="-696.3778124423984" z="0.0" y="-1203.0788706334604"/>
  </node>
  <node id="33002" label="CEJ45116_4" cy:nodeId="29842">
    <graphics x="1791.2744867538352" z="0.0" y="-1316.577959657783"/>
  </node>
  <node id="33896" label="OBQ36138_1" cy:nodeId="178">
    <graphics x="-619.5373372683819" z="0.0" y="-1134.25195986011"/>
  </node>
  <node id="32477" label="WP_125792341_1" cy:nodeId="31922">
    <graphics x="623.9191268062499" z="0.0" y="1926.2183551587636"/>
  </node>
  <node id="33880" label="WP_026100063_6" cy:nodeId="210">
    <graphics x="-713.9452275185317" z="0.0" y="-1199.7339686558878"/>
  </node>
  <node id="32459" label="WP_168880029_2" cy:nodeId="31954">
    <graphics x="193.85688580195006" z="0.0" y="2548.5373785568986"/>
  </node>
  <node id="33864" label="WP_148763415_5" cy:nodeId="242">
    <graphics x="-414.15429533118674" z="0.0" y="-1383.9964317371084"/>
  </node>
  <node id="33419" label="WP_152591271_1" cy:nodeId="2322">
    <graphics x="-937.8581587287761" z="0.0" y="-1319.0470497677632"/>
  </node>
  <node id="32812" label="WP_018960901_3" cy:nodeId="30994">
    <graphics x="1889.6765684365105" z="0.0" y="550.0807550449587"/>
  </node>
  <node id="32416" label="WP_089091039_6" cy:nodeId="32018">
    <graphics x="2360.240835081735" z="0.0" y="2440.8152105881486"/>
  </node>
  <node id="33833" label="WP_127086205_4" cy:nodeId="306">
    <graphics x="-1053.5091246919762" z="0.0" y="-1145.7648717625013"/>
  </node>
  <node id="33349" label="WP_009343975_6" cy:nodeId="3378">
    <graphics x="-731.6923754563609" z="0.0" y="-1131.0229074646084"/>
  </node>
  <node id="32395" label="AOX46105_4" cy:nodeId="32050">
    <graphics x="-762.5627843030304" z="0.0" y="2808.985773332289"/>
  </node>
  <node id="33531" label="WP_086829041_1" cy:nodeId="1362">
    <graphics x="-690.6348454492627" z="0.0" y="-200.33416350084627"/>
  </node>
  <node id="33346" label="WP_073639381_2" cy:nodeId="3410">
    <graphics x="-461.8830671197205" z="0.0" y="-1513.572191272531"/>
  </node>
  <node id="32795" label="WP_142936832_3" cy:nodeId="31058">
    <graphics x="-1221.1957126744599" z="0.0" y="1250.1570398880754"/>
  </node>
  <node id="33802" label="WP_066371470_2" cy:nodeId="370">
    <graphics x="-519.2707899431928" z="0.0" y="-74.19579064802977"/>
  </node>
  <node id="33414" label="WP_166841243_2" cy:nodeId="2418">
    <graphics x="-987.2895072121398" z="0.0" y="-437.2673505862829"/>
  </node>
  <node id="33339" label="WP_017318973_2" cy:nodeId="3442">
    <graphics x="-987.8124062290578" z="0.0" y="-1129.2147023983596"/>
  </node>
  <node id="33172" label="WP_086689015_3" cy:nodeId="11634">
    <graphics x="-1720.388570361625" z="0.0" y="-1477.2090128424059"/>
  </node>
  <node id="32352" label="WP_096680266_4" cy:nodeId="32114">
    <graphics x="1403.8211649767547" z="0.0" y="2701.263605363539"/>
  </node>
  <node id="33114" label="WP_161481447_7" cy:nodeId="24978">
    <graphics x="-341.4614313738068" z="0.0" y="-311.26269541690147"/>
  </node>
  <node id="32783" label="WP_137248807_1" cy:nodeId="31122">
    <graphics x="-722.6406809428204" z="0.0" y="1177.582308659579"/>
  </node>
  <node id="32331" label="WP_017743137_1" cy:nodeId="32146">
    <graphics x="-1689.7198544629425" z="0.0" y="3016.707941301039"/>
  </node>
  <node id="32963" label="WP_138499068_7" cy:nodeId="30162">
    <graphics x="-1139.2293873914093" z="0.0" y="806.9836924149308"/>
  </node>
  <node id="32288" label="AVH79456_5" cy:nodeId="32210">
    <graphics x="476.66409481684263" z="0.0" y="2908.985773332289"/>
  </node>
  <node id="33747" label="WP_109595189_1" cy:nodeId="498">
    <graphics x="-1056.2890452908698" z="0.0" y="-153.33950704974157"/>
  </node>
  <node id="33508" label="WP_096688632_7" cy:nodeId="1522">
    <graphics x="-1017.2216892623389" z="0.0" y="-1157.889098306612"/>
  </node>
  <node id="33398" label="WP_138499068_6" cy:nodeId="2546">
    <graphics x="-657.9981875415829" z="0.0" y="-1163.9655065795703"/>
  </node>
  <node id="33247" label="WP_087539234_5" cy:nodeId="6642">
    <graphics x="-552.6714028743147" z="0.0" y="-1369.7736911747668"/>
  </node>
  <node id="32760" label="WP_055189764_1" cy:nodeId="31218">
    <graphics x="-245.57547580083315" z="0.0" y="1125.387790925673"/>
  </node>
  <node id="32267" label="WP_159529421_2" cy:nodeId="32242">
    <graphics x="1606.838617216745" z="0.0" y="3016.707941301039"/>
  </node>
  <node id="33731" label="WP_053706403_2" cy:nodeId="530">
    <graphics x="-1039.2035572981338" z="0.0" y="-195.4186796528291"/>
  </node>
  <node id="33502" label="WP_138499827_3" cy:nodeId="1554">
    <graphics x="-952.5706219815463" z="0.0" y="-1306.0885566404502"/>
  </node>
  <node id="33497" label="WP_087592205_11" cy:nodeId="1586">
    <graphics x="-878.6802287502495" z="0.0" y="-1208.9353706851432"/>
  </node>
  <node id="33332" label="WP_106240815_4" cy:nodeId="3634">
    <graphics x="-1048.7791726572607" z="0.0" y="-1165.8898212148522"/>
  </node>
  <node id="33060" label="WP_167721203_4" cy:nodeId="29234">
    <graphics x="756.6937219833278" z="0.0" y="-1415.714907766456"/>
  </node>
  <node id="32742" label="WP_121750537_3" cy:nodeId="31282">
    <graphics x="616.7754381802172" z="0.0" y="1202.2583296934663"/>
  </node>
  <node id="33713" label="WP_016570561_1" cy:nodeId="594">
    <graphics x="-1078.0360072121487" z="0.0" y="-125.32050532606698"/>
  </node>
  <node id="33327" label="BAZ42602_3" cy:nodeId="3666">
    <graphics x="-1006.5282069273806" z="0.0" y="-1291.949043041055"/>
  </node>
  <node id="32733" label="WP_138498533_5" cy:nodeId="31314">
    <graphics x="1903.7478196491047" z="0.0" y="1146.6955905641105"/>
  </node>
  <node id="33702" label="WP_015113151_4" cy:nodeId="626">
    <graphics x="-653.8124750466952" z="0.0" y="-1244.477487742686"/>
  </node>
  <node id="33694" label="WP_089091039_4" cy:nodeId="658">
    <graphics x="-732.0636827518751" z="0.0" y="-1302.2482851652492"/>
  </node>
  <node id="33483" label="WP_012409362_4" cy:nodeId="1682">
    <graphics x="-668.9724214389275" z="0.0" y="-1308.1052022490364"/>
  </node>
  <node id="33290" label="WP_096730381_3" cy:nodeId="4786">
    <graphics x="-1898.3156131536527" z="0.0" y="-1502.3934795873536"/>
  </node>
  <node id="32924" label="WP_107397356_1" cy:nodeId="30386">
    <graphics x="-267.3210923030631" z="0.0" y="570.2214653186104"/>
  </node>
  <node id="32692" label="WP_137248807_2" cy:nodeId="31442">
    <graphics x="618.5711035832884" z="0.0" y="1573.8221436879378"/>
  </node>
  <node id="33664" label="WP_167721203_2" cy:nodeId="754">
    <graphics x="-931.6577228972735" z="0.0" y="-1307.7654094587376"/>
  </node>
  <node id="33092" label="WP_016950293_1" cy:nodeId="28434">
    <graphics x="410.42580435027116" z="0.0" y="-1379.5961176167673"/>
  </node>
  <node id="33023" label="AVH79456_1" cy:nodeId="29458">
    <graphics x="1306.0305902694588" z="0.0" y="-1297.2064729939646"/>
  </node>
  <node id="33076" label="WP_096680266_1" cy:nodeId="28466">
    <graphics x="441.5548860763454" z="0.0" y="-1425.3088861714548"/>
  </node>
  <node id="33636" label="WP_027845719_2" cy:nodeId="850">
    <graphics x="-841.007546841486" z="0.0" y="-1147.2516589956538"/>
  </node>
  <node id="33153" label="RCJ40850_3" cy:nodeId="14162">
    <graphics x="-1017.8212013899163" z="0.0" y="-1114.150076909649"/>
  </node>
  <node id="32645" label="WP_109003510_1" cy:nodeId="31570">
    <graphics x="-1296.9526788712005" z="0.0" y="1974.084782792398"/>
  </node>
  <node id="32631" label="WP_125690181_3" cy:nodeId="31602">
    <graphics x="-212.51226485162405" z="0.0" y="2062.055233436601"/>
  </node>
  <node id="33610" label="WP_012597836_7" cy:nodeId="914">
    <graphics x="-944.5548152127001" z="0.0" y="-1089.1715934219717"/>
  </node>
  <node id="33233" label="WP_026100063_5" cy:nodeId="7058">
    <graphics x="-762.1363448985207" z="0.0" y="-1219.8235153897729"/>
  </node>
  <node id="33201" label="WP_015212417_4" cy:nodeId="8082">
    <graphics x="-757.0914564103873" z="0.0" y="-1208.403902449372"/>
  </node>
  <node id="32885" label="CNF13542_5" cy:nodeId="30642">
    <graphics x="450.27083427164393" z="0.0" y="790.5535576037666"/>
  </node>
  <node id="33446" label="WP_015207767_5" cy:nodeId="2034">
    <graphics x="-814.3540852932197" z="0.0" y="-975.5047576760583"/>
  </node>
  <node id="33575" label="WP_051851944_3" cy:nodeId="1075">
    <graphics x="-785.147208279371" z="0.0" y="-64.61530598087714"/>
  </node>
  <node id="33441" label="WP_138498533_6" cy:nodeId="2099">
    <graphics x="-925.0544836767065" z="0.0" y="-1255.3340718213765"/>
  </node>
  <node id="33185" label="ANI93503_2" cy:nodeId="10291">
    <graphics x="-904.445708487089" z="0.0" y="-125.96890293239883"/>
  </node>
  <node id="32857" label="WP_068208510_1" cy:nodeId="30771">
    <graphics x="1569.163110626425" z="0.0" y="627.0582852102505"/>
  </node>
  <node id="33566" label="BAY08128_2" cy:nodeId="1107">
    <graphics x="-753.0678779849254" z="0.0" y="-1201.8550494995613"/>
  </node>
  <node id="32526" label="WP_017315790_2" cy:nodeId="31827">
    <graphics x="81.59691609064635" z="0.0" y="2161.6212484909806"/>
  </node>
  <node id="32842" label="WP_106115031_2" cy:nodeId="30835">
    <graphics x="1203.2333897249105" z="0.0" y="550.8552218999381"/>
  </node>
  <node id="32509" label="WP_165975342_2" cy:nodeId="31859">
    <graphics x="1234.2477129809051" z="0.0" y="2181.642549760512"/>
  </node>
  <node id="33553" label="SLE69095_1" cy:nodeId="1171">
    <graphics x="-1048.8663394826806" z="0.0" y="-324.2971981293873"/>
  </node>
  <node id="33425" label="BAZ33272_4" cy:nodeId="2227">
    <graphics x="-1007.0149411193258" z="0.0" y="-1009.9087788413341"/>
  </node>
  <node id="33299" label="WP_051857755_1" cy:nodeId="4275">
    <graphics x="-736.0710062757364" z="0.0" y="-240.61920390089534"/>
  </node>
  <node id="32823" label="WP_097216730_1" cy:nodeId="30931">
    <graphics x="2422.874095845974" z="0.0" y="625.2971761572833"/>
  </node>
  <node id="32458" label="WP_168880027_2" cy:nodeId="31955">
    <graphics x="196.8743380419403" z="0.0" y="2440.8152105881486"/>
  </node>
  <node id="32437" label="WP_089505437_2" cy:nodeId="31987">
    <graphics x="1327.0488604418426" z="0.0" y="2548.5373785568986"/>
  </node>
  <node id="33848" label="WP_073591536_1" cy:nodeId="275">
    <graphics x="-1038.5410116529376" z="0.0" y="-1320.5148873902688"/>
  </node>
  <node id="32987" label="WP_013190203_2" cy:nodeId="29971">
    <graphics x="1764.5911371444602" z="0.0" y="-1344.381182314033"/>
  </node>
  <node id="33535" label="WP_019501955_12" cy:nodeId="1331">
    <graphics x="-916.6039721637196" z="0.0" y="-1318.7230645361885"/>
  </node>
  <node id="33067" label="WP_016874828_1" cy:nodeId="28979">
    <graphics x="509.64797231902116" z="0.0" y="-1342.125811220283"/>
  </node>
  <node id="32974" label="WP_124271963_2" cy:nodeId="30003">
    <graphics x="2171.398660864078" z="0.0" y="-1330.1949704617316"/>
  </node>
  <node id="32394" label="WP_008380405_1" cy:nodeId="32051">
    <graphics x="-759.5453320630402" z="0.0" y="2701.263605363539"/>
  </node>
  <node id="33817" label="WP_086769105_3" cy:nodeId="339">
    <graphics x="-905.54579562912" z="0.0" y="-1247.5113395423575"/>
  </node>
  <node id="32373" label="WP_051840628_2" cy:nodeId="32083">
    <graphics x="370.62919033686217" z="0.0" y="2808.985773332289"/>
  </node>
  <node id="33524" label="WP_089091039_5" cy:nodeId="1395">
    <graphics x="-778.2175814121433" z="0.0" y="-1252.6248621232987"/>
  </node>
  <node id="32968" label="WP_051746348_1" cy:nodeId="30067">
    <graphics x="1946.7616445676924" z="0.0" y="-1291.7481397122199"/>
  </node>
  <node id="33791" label="WP_087592205_6" cy:nodeId="403">
    <graphics x="-952.9727015417582" z="0.0" y="-1197.762765179348"/>
  </node>
  <node id="33406" label="RCJ30949_1" cy:nodeId="2451">
    <graphics x="-738.869373713183" z="0.0" y="-1220.0394241017236"/>
  </node>
  <node id="32330" label="WP_155752488_1" cy:nodeId="32147">
    <graphics x="-1686.7024022229523" z="0.0" y="2908.985773332289"/>
  </node>
  <node id="33778" label="WP_070396036_1" cy:nodeId="435">
    <graphics x="-952.909576784207" z="0.0" y="-1055.6184067516767"/>
  </node>
  <node id="32309" label="WP_169264746_3" cy:nodeId="32179">
    <graphics x="-556.52787982305" z="0.0" y="3016.707941301039"/>
  </node>
  <node id="33762" label="WP_052680420_3" cy:nodeId="467">
    <graphics x="-1112.3691243299634" z="0.0" y="30.54060312205675"/>
  </node>
  <node id="33516" label="RCJ30949_9" cy:nodeId="1491">
    <graphics x="-456.01862811934495" z="0.0" y="-1196.7072350299748"/>
  </node>
  <node id="33065" label="WP_073631441_1" cy:nodeId="29139">
    <graphics x="397.18154165495866" z="0.0" y="-1287.5246759663767"/>
  </node>
  <node id="32769" label="WP_068028504_3" cy:nodeId="31187">
    <graphics x="-425.5301571973175" z="0.0" y="1217.2786676956925"/>
  </node>
  <node id="33156" label="WP_087539234_8" cy:nodeId="13811">
    <graphics x="-1408.924704699166" z="0.0" y="-1400.4600186702044"/>
  </node>
  <node id="32266" label="AOX46105_1" cy:nodeId="32243">
    <graphics x="1609.8560694567352" z="0.0" y="2908.985773332289"/>
  </node>
  <node id="33189" label="WP_068099584_3" cy:nodeId="9747">
    <graphics x="-971.0671444052939" z="0.0" y="110.57889932204253"/>
  </node>
  <node id="32751" label="WP_096664869_4" cy:nodeId="31251">
    <graphics x="721.4824568303827" z="0.0" y="1236.8833614076163"/>
  </node>
  <node id="33047" label="WP_086760950_5" cy:nodeId="29267">
    <graphics x="645.7782442306423" z="0.0" y="-1426.1397353421396"/>
  </node>
  <node id="33293" label="WP_015212417_6" cy:nodeId="4755">
    <graphics x="-488.5214271397847" z="0.0" y="-1211.855312539981"/>
  </node>
  <node id="33684" label="WP_073644071_4" cy:nodeId="691">
    <graphics x="-643.7381510490952" z="0.0" y="-1238.1393588629614"/>
  </node>
  <node id="33675" label="WP_073644071_8" cy:nodeId="723">
    <graphics x="-615.0117028038651" z="0.0" y="-1277.6807540282205"/>
  </node>
  <node id="32682" label="WP_144874993_3" cy:nodeId="31475">
    <graphics x="-316.31447446973414" z="0.0" y="1748.0741635138943"/>
  </node>
  <node id="33319" label="WP_031017311_2" cy:nodeId="3859">
    <graphics x="-845.969624812912" z="0.0" y="-411.26185976583554"/>
  </node>
  <node id="33644" label="WP_091097544_2" cy:nodeId="819">
    <graphics x="-950.5540481261203" z="0.0" y="-184.3402116669229"/>
  </node>
  <node id="33460" label="WP_051840194_1" cy:nodeId="1843">
    <graphics x="-856.6164502706605" z="0.0" y="-369.8592888103801"/>
  </node>
  <node id="33264" label="WP_115965582_3" cy:nodeId="5971">
    <graphics x="-927.0976746458552" z="0.0" y="113.1407888342741"/>
  </node>
  <node id="32900" label="WP_046417231_1" cy:nodeId="30547">
    <graphics x="169.23506767008143" z="0.0" y="751.4804832629463"/>
  </node>
  <node id="33622" label="BBD63560_4" cy:nodeId="883">
    <graphics x="-821.3633812628973" z="0.0" y="-1085.0309517053136"/>
  </node>
  <node id="33372" label="WP_091097544_1" cy:nodeId="2931">
    <graphics x="-1072.8180301661134" z="0.0" y="-263.13254864278736"/>
  </node>
  <node id="32618" label="RZJ53728_2" cy:nodeId="31635">
    <graphics x="1660.9094362936173" z="0.0" y="1598.4474263846705"/>
  </node>
  <node id="33599" label="WP_015210601_2" cy:nodeId="947">
    <graphics x="-706.2682250564972" z="0.0" y="-1195.3872021972963"/>
  </node>
  <node id="33451" label="WP_012409787_4" cy:nodeId="1971">
    <graphics x="-870.5062333298546" z="0.0" y="-1082.9184141142357"/>
  </node>
  <node id="32603" label="WP_159037419_2" cy:nodeId="31667">
    <graphics x="-492.98790579455664" z="0.0" y="2021.3251446581141"/>
  </node>
  <node id="33146" label="RCJ19623_3" cy:nodeId="15315">
    <graphics x="-846.0515396315885" z="0.0" y="-1329.2125981381575"/>
  </node>
  <node id="32575" label="WP_103138325_8" cy:nodeId="31731">
    <graphics x="955.9187127891098" z="0.0" y="2012.4823731842084"/>
  </node>
  <node id="33588" label="ANI93503_3" cy:nodeId="1044">
    <graphics x="-1014.9191373503061" z="0.0" y="21.01712964017625"/>
  </node>
  <node id="32559" label="WP_071187741_3" cy:nodeId="31764">
    <graphics x="2236.4800340476545" z="0.0" y="1954.8167313995405"/>
  </node>
  <node id="33224" label="WP_029630331_2" cy:nodeId="7220">
    <graphics x="-1118.7568229489555" z="0.0" y="-1252.6008766450284"/>
  </node>
  <node id="32542" label="WP_141310912_4" cy:nodeId="31796">
    <graphics x="-1073.615276444754" z="0.0" y="2200.4327108933244"/>
  </node>
  <node id="33943" label="WP_099071810_2" cy:nodeId="84">
    <graphics x="-699.1366643776705" z="0.0" y="-1275.977878133959"/>
  </node>
  <node id="32525" label="WP_008232444_3" cy:nodeId="31828">
    <graphics x="188.3572367540985" z="0.0" y="2176.368379838637"/>
  </node>
  <node id="33927" label="WP_016950446_1" cy:nodeId="116">
    <graphics x="-676.6412363140548" z="0.0" y="-1266.7202009310893"/>
  </node>
  <node id="33911" label="TVP62740_1" cy:nodeId="148">
    <graphics x="-750.5929170227314" z="0.0" y="-1223.1105472843226"/>
  </node>
  <node id="33001" label="WP_073644071_3" cy:nodeId="29844">
    <graphics x="1586.8320352767844" z="0.0" y="-1408.3772150288767"/>
  </node>
  <node id="32493" label="WP_171084023_2" cy:nodeId="31892">
    <graphics x="2361.8474291674283" z="0.0" y="2161.6212484909806"/>
  </node>
  <node id="33895" label="WP_096569967_3" cy:nodeId="180">
    <graphics x="-773.415381571132" z="0.0" y="-1188.9886938530433"/>
  </node>
  <node id="32831" label="WP_060892878_6" cy:nodeId="30900">
    <graphics x="-1808.2306262045272" z="0.0" y="1302.7673657605333"/>
  </node>
  <node id="32476" label="SFK92261_3" cy:nodeId="31924">
    <graphics x="557.7524474239252" z="0.0" y="2011.3252887525136"/>
  </node>
  <node id="33879" label="WP_096575011_2" cy:nodeId="212">
    <graphics x="-659.364556725282" z="0.0" y="-1171.8642644621611"/>
  </node>
  <node id="33863" label="WP_071189061_4" cy:nodeId="244">
    <graphics x="-488.8765828385069" z="0.0" y="-1327.1602696458174"/>
  </node>
  <node id="32436" label="WP_014173637_1" cy:nodeId="31988">
    <graphics x="1330.0663126818329" z="0.0" y="2440.8152105881486"/>
  </node>
  <node id="32811" label="WP_107115831_4" cy:nodeId="30996">
    <graphics x="1819.8629698036982" z="0.0" y="537.9450738926149"/>
  </node>
  <node id="32415" label="WP_008180360_7" cy:nodeId="32020">
    <graphics x="-1792.7373067029328" z="0.0" y="2808.985773332289"/>
  </node>
  <node id="33832" label="WP_168643398_4" cy:nodeId="308">
    <graphics x="-1054.477016914199" z="0.0" y="-1249.2535201481257"/>
  </node>
  <node id="33530" label="WP_164312175_2" cy:nodeId="1364">
    <graphics x="-796.4367885226031" z="0.0" y="-287.102874058916"/>
  </node>
  <node id="33249" label="RCJ14929_2" cy:nodeId="6484">
    <graphics x="-706.9889104092431" z="0.0" y="-1185.659217386932"/>
  </node>
  <node id="32372" label="WP_125821548_3" cy:nodeId="32084">
    <graphics x="373.6466425768524" z="0.0" y="2701.263605363539"/>
  </node>
  <node id="33801" label="WP_062339008_5" cy:nodeId="372">
    <graphics x="-586.1661372504542" z="0.0" y="4.385588968021153"/>
  </node>
  <node id="32791" label="PZN45587_2" cy:nodeId="31092">
    <graphics x="-761.1112009623516" z="0.0" y="1221.808611760165"/>
  </node>
  <node id="32351" label="WP_051642643_3" cy:nodeId="32116">
    <graphics x="1503.8211649767547" z="0.0" y="2808.985773332289"/>
  </node>
  <node id="33297" label="WP_109497443_2" cy:nodeId="4500">
    <graphics x="-794.3709915078009" z="0.0" y="-194.43336964343945"/>
  </node>
  <node id="32308" label="WP_169264744_3" cy:nodeId="32180">
    <graphics x="-553.5104275830597" z="0.0" y="2908.985773332289"/>
  </node>
  <node id="32962" label="WP_071189061_5" cy:nodeId="30164">
    <graphics x="-756.894823182425" z="0.0" y="652.1417429520402"/>
  </node>
  <node id="32287" label="WP_096590410_1" cy:nodeId="32212">
    <graphics x="576.6640948168426" z="0.0" y="3016.707941301039"/>
  </node>
  <node id="33746" label="WP_145487439_2" cy:nodeId="500">
    <graphics x="-1127.8858234922752" z="0.0" y="-179.19844000015908"/>
  </node>
  <node id="33507" label="WP_099700413_1" cy:nodeId="1524">
    <graphics x="-991.7198240904534" z="0.0" y="-1139.1065525982592"/>
  </node>
  <node id="32759" label="WP_107498105_3" cy:nodeId="31220">
    <graphics x="-157.35126315434877" z="0.0" y="1184.2028963639054"/>
  </node>
  <node id="32938" label="TVP63782_7" cy:nodeId="30228">
    <graphics x="-1776.8544608996845" z="0.0" y="675.4416718003542"/>
  </node>
  <node id="32750" label="WP_148763415_1" cy:nodeId="31252">
    <graphics x="781.1148115667108" z="0.0" y="1191.8699641908192"/>
  </node>
  <node id="33722" label="SNT25203_1" cy:nodeId="564">
    <graphics x="-972.0663189697887" z="0.0" y="-140.10304786035593"/>
  </node>
  <node id="33496" label="WP_138499827_2" cy:nodeId="1588">
    <graphics x="-835.6749824512798" z="0.0" y="-1251.0637188850849"/>
  </node>
  <node id="33059" label="AVH79662_4" cy:nodeId="29236">
    <graphics x="652.9057428573512" z="0.0" y="-1310.8757277737802"/>
  </node>
  <node id="32741" label="WP_104779873_1" cy:nodeId="31284">
    <graphics x="574.0437487270922" z="0.0" y="1144.7540343443452"/>
  </node>
  <node id="33488" label="WP_068385845_6" cy:nodeId="1620">
    <graphics x="-979.0509306369629" z="0.0" y="-1250.1803303259837"/>
  </node>
  <node id="33161" label="WP_029630331_1" cy:nodeId="12884">
    <graphics x="-910.9984383435501" z="0.0" y="-1333.4821080583677"/>
  </node>
  <node id="32732" label="WP_073643028_2" cy:nodeId="31316">
    <graphics x="1903.0864426959797" z="0.0" y="1233.8984409059078"/>
  </node>
  <node id="33701" label="WP_057178590_1" cy:nodeId="628">
    <graphics x="-748.5970700436442" z="0.0" y="-1213.77614855739"/>
  </node>
  <node id="33388" label="WP_015207763_5" cy:nodeId="2676">
    <graphics x="-875.4698021845242" z="0.0" y="-1013.6133578148035"/>
  </node>
  <node id="32722" label="WP_027402982_1" cy:nodeId="31348">
    <graphics x="2109.1777754665623" z="0.0" y="1186.478518376376"/>
  </node>
  <node id="33289" label="WP_167725682_3" cy:nodeId="4788">
    <graphics x="-1825.5765210928214" z="0.0" y="-1556.0282908748666"/>
  </node>
  <node id="32923" label="WP_088612422_2" cy:nodeId="30388">
    <graphics x="-351.39427345540685" z="0.0" y="582.3992149523995"/>
  </node>
  <node id="33154" label="WP_051438280_1" cy:nodeId="14036">
    <graphics x="-922.2102814092007" z="0.0" y="226.50882002877304"/>
  </node>
  <node id="33663" label="WP_104899482_2" cy:nodeId="756">
    <graphics x="-985.5234558150685" z="0.0" y="-1418.0599639877507"/>
  </node>
  <node id="33112" label="WP_086820173_1" cy:nodeId="26356">
    <graphics x="-1053.776353405259" z="0.0" y="348.3189982936324"/>
  </node>
  <node id="33473" label="WP_015127932_7" cy:nodeId="1812">
    <graphics x="-475.21155915092027" z="0.0" y="-1291.7109434439515"/>
  </node>
  <node id="33091" label="WP_029637656_3" cy:nodeId="28436">
    <graphics x="421.7571184371852" z="0.0" y="-1348.9919306050485"/>
  </node>
  <node id="33022" label="AVH79628_1" cy:nodeId="29460">
    <graphics x="1319.6104242538338" z="0.0" y="-1437.333330751533"/>
  </node>
  <node id="32667" label="WP_135099815_3" cy:nodeId="31508">
    <graphics x="-784.5890571559321" z="0.0" y="1552.8957241869227"/>
  </node>
  <node id="33075" label="WP_103138934_1" cy:nodeId="28468">
    <graphics x="519.4231645797634" z="0.0" y="-1393.6684137593454"/>
  </node>
  <node id="33635" label="BBD63560_2" cy:nodeId="852">
    <graphics x="-930.3841601243173" z="0.0" y="-1100.6035851325903"/>
  </node>
  <node id="32644" label="WP_015193424_1" cy:nodeId="31572">
    <graphics x="-1187.6537439346764" z="0.0" y="1963.9247486127106"/>
  </node>
  <node id="32893" label="WP_030193573_1" cy:nodeId="30580">
    <graphics x="73.76824027750331" z="0.0" y="762.6291954211495"/>
  </node>
  <node id="33609" label="WP_163670238_2" cy:nodeId="916">
    <graphics x="-961.3527870506211" z="0.0" y="-1031.3892702082119"/>
  </node>
  <node id="32617" label="WP_047775239_1" cy:nodeId="31636">
    <graphics x="1768.3242045126117" z="0.0" y="1621.2758870780299"/>
  </node>
  <node id="32884" label="WP_062437448_3" cy:nodeId="30644">
    <graphics x="313.4456084415658" z="0.0" y="742.5507805041573"/>
  </node>
  <node id="33177" label="ALC22075_2" cy:nodeId="11220">
    <graphics x="-1036.429877610159" z="0.0" y="-173.31648422111792"/>
  </node>
  <node id="33124" label="TWH40986_3" cy:nodeId="21460">
    <graphics x="-1397.0976520902188" z="0.0" y="-1219.811564646912"/>
  </node>
  <node id="32590" label="WP_168501874_3" cy:nodeId="31700">
    <graphics x="-663.5260153768438" z="0.0" y="1926.909539711356"/>
  </node>
  <node id="33445" label="WP_096579222_1" cy:nodeId="2036">
    <graphics x="-615.8907404359481" z="0.0" y="-1078.144692619291"/>
  </node>
  <node id="32558" label="AGP61345_3" cy:nodeId="31765">
    <graphics x="2137.2813340964826" z="0.0" y="1912.6283082428022"/>
  </node>
  <node id="33574" label="WP_068210304_1" cy:nodeId="1077">
    <graphics x="-757.5219721771075" z="0.0" y="-91.90817474711233"/>
  </node>
  <node id="33560" label="WP_027402982_2" cy:nodeId="1141">
    <graphics x="-755.2067518651306" z="0.0" y="-1254.8342293967905"/>
  </node>
  <node id="33552" label="SLE69095_3" cy:nodeId="1173">
    <graphics x="-1083.9901425309592" z="0.0" y="-341.38266711906795"/>
  </node>
  <node id="32492" label="WP_157777555_2" cy:nodeId="31893">
    <graphics x="2378.4895037523893" z="0.0" y="2268.1083090378556"/>
  </node>
  <node id="33182" label="WP_096536886_6" cy:nodeId="10421">
    <graphics x="-648.2062238881765" z="0.0" y="-1211.5968989738792"/>
  </node>
  <node id="32822" label="WP_121750537_1" cy:nodeId="30933">
    <graphics x="2356.4382762201194" z="0.0" y="623.1131551611895"/>
  </node>
  <node id="32457" label="WP_094261964_2" cy:nodeId="31957">
    <graphics x="296.8743380419403" z="0.0" y="2548.5373785568986"/>
  </node>
  <node id="33847" label="WP_006619051_7" cy:nodeId="277">
    <graphics x="-1059.456817027967" z="0.0" y="-1059.151678367827"/>
  </node>
  <node id="33219" label="AVH79535_7" cy:nodeId="7445">
    <graphics x="-1037.0097482724516" z="0.0" y="-1189.8065182015014"/>
  </node>
  <node id="32414" label="WP_096605992_7" cy:nodeId="32021">
    <graphics x="-1789.7198544629425" z="0.0" y="2701.263605363539"/>
  </node>
  <node id="32393" label="WP_124155194_3" cy:nodeId="32053">
    <graphics x="-659.5453320630402" z="0.0" y="2808.985773332289"/>
  </node>
  <node id="33816" label="WP_006513161_3" cy:nodeId="341">
    <graphics x="-1128.2148516854797" z="0.0" y="-1174.572912279709"/>
  </node>
  <node id="32790" label="WP_131969051_1" cy:nodeId="31093">
    <graphics x="-710.2769724467266" z="0.0" y="1112.4769619798915"/>
  </node>
  <node id="32350" label="WP_047015652_3" cy:nodeId="32117">
    <graphics x="1506.838617216745" z="0.0" y="2701.263605363539"/>
  </node>
  <node id="32329" label="WP_049976882_2" cy:nodeId="32149">
    <graphics x="-1586.7024022229523" z="0.0" y="3016.707941301039"/>
  </node>
  <node id="33777" label="WP_099700413_2" cy:nodeId="437">
    <graphics x="-957.3055015133275" z="0.0" y="-1277.198994064838"/>
  </node>
  <node id="33761" label="WP_051700182_4" cy:nodeId="469">
    <graphics x="-1011.324785364465" z="0.0" y="-48.33076865974593"/>
  </node>
  <node id="32961" label="WP_096569967_9" cy:nodeId="30165">
    <graphics x="-709.0148793347687" z="0.0" y="790.6629679276261"/>
  </node>
  <node id="32768" label="WP_008380405_3" cy:nodeId="31189">
    <graphics x="-548.1612149365753" z="0.0" y="1139.5949137284074"/>
  </node>
  <node id="32286" label="WP_096590413_1" cy:nodeId="32213">
    <graphics x="579.6815470568329" z="0.0" y="2908.985773332289"/>
  </node>
  <node id="33113" label="WP_088242795_3" cy:nodeId="25077">
    <graphics x="-263.93522117307236" z="0.0" y="-1140.7096549740706"/>
  </node>
  <node id="32265" label="WP_045869173_1" cy:nodeId="32245">
    <graphics x="1709.8560694567352" z="0.0" y="3016.707941301039"/>
  </node>
  <node id="33730" label="WP_106115031_4" cy:nodeId="533">
    <graphics x="-1013.6318568129434" z="0.0" y="-148.5053573560788"/>
  </node>
  <node id="33155" label="WP_106300787_4" cy:nodeId="13845">
    <graphics x="-1104.493763408362" z="0.0" y="-1319.0199812103708"/>
  </node>
  <node id="33712" label="WP_159425899_2" cy:nodeId="597">
    <graphics x="-966.2333001960294" z="0.0" y="-192.3711527324984"/>
  </node>
  <node id="33149" label="WP_161481447_4" cy:nodeId="14965">
    <graphics x="-262.0229991660101" z="0.0" y="-251.23406121004396"/>
  </node>
  <node id="33683" label="WP_066383651_6" cy:nodeId="693">
    <graphics x="-666.7536292344735" z="0.0" y="-1261.519561336219"/>
  </node>
  <node id="33674" label="WP_073644071_2" cy:nodeId="725">
    <graphics x="-712.9465920278158" z="0.0" y="-1204.0863680340296"/>
  </node>
  <node id="32912" label="WP_017569537_2" cy:nodeId="30421">
    <graphics x="-159.89222114827794" z="0.0" y="640.5501548938057"/>
  </node>
  <node id="32681" label="WP_028525980_3" cy:nodeId="31477">
    <graphics x="182.3137745886707" z="0.0" y="1501.2524084037964"/>
  </node>
  <node id="33318" label="WP_157857956_1" cy:nodeId="3861">
    <graphics x="-875.6263624380452" z="0.0" y="-300.587964991783"/>
  </node>
  <node id="33206" label="WP_109497443_3" cy:nodeId="7957">
    <graphics x="-878.2306303115555" z="0.0" y="-234.00032938525575"/>
  </node>
  <node id="33459" label="WP_106331017_2" cy:nodeId="1845">
    <graphics x="-772.7300154170018" z="0.0" y="-396.59316296465727"/>
  </node>
  <node id="33015" label="WP_012595952_2" cy:nodeId="29493">
    <graphics x="1267.0278742050061" z="0.0" y="-1481.0005060445017"/>
  </node>
  <node id="33263" label="WP_068028504_2" cy:nodeId="5973">
    <graphics x="-1048.7093496668028" z="0.0" y="-10.171193478431263"/>
  </node>
  <node id="32643" label="WP_015193424_2" cy:nodeId="31573">
    <graphics x="-1248.4849054337005" z="0.0" y="1875.6664478314601"/>
  </node>
  <node id="32630" label="WP_015189896_4" cy:nodeId="31605">
    <graphics x="-915.5931238746496" z="0.0" y="1915.7693371915775"/>
  </node>
  <node id="32589" label="WP_168496018_2" cy:nodeId="31701">
    <graphics x="-790.0248404500862" z="0.0" y="1960.2587828754185"/>
  </node>
  <node id="33365" label="WP_078760724_2" cy:nodeId="3094">
    <graphics x="-1133.5748517416885" z="0.0" y="-159.75494634066743"/>
  </node>
  <node id="33942" label="WP_015113151_1" cy:nodeId="86">
    <graphics x="-636.8880427837423" z="0.0" y="-1284.7857578659493"/>
  </node>
  <node id="33438" label="WP_066383651_1" cy:nodeId="2134">
    <graphics x="-582.6886550545162" z="0.0" y="-1230.6823561073577"/>
  </node>
  <node id="33259" label="WP_129307298_3" cy:nodeId="6230">
    <graphics x="-622.4838792878663" z="0.0" y="-11.721785444976007"/>
  </node>
  <node id="32524" label="WP_104386798_3" cy:nodeId="31830">
    <graphics x="122.19055737177428" z="0.0" y="2261.475313432387"/>
  </node>
  <node id="33926" label="WP_087539234_7" cy:nodeId="118">
    <graphics x="-763.6307245101484" z="0.0" y="-1182.1091889895795"/>
  </node>
  <node id="32508" label="WP_006619051_1" cy:nodeId="31862">
    <graphics x="1334.2477129809051" z="0.0" y="2161.6212484909806"/>
  </node>
  <node id="33910" label="BAZ29283_4" cy:nodeId="150">
    <graphics x="-766.6129268452928" z="0.0" y="-1218.9956685333925"/>
  </node>
  <node id="33000" label="WP_069073064_2" cy:nodeId="29846">
    <graphics x="1577.0761072372336" z="0.0" y="-1366.9668146382517"/>
  </node>
  <node id="33894" label="WP_096569967_5" cy:nodeId="182">
    <graphics x="-750.627184688899" z="0.0" y="-1151.0984955233469"/>
  </node>
  <node id="32830" label="WP_164312175_5" cy:nodeId="30902">
    <graphics x="-1615.7689410238638" z="0.0" y="1135.9585431286978"/>
  </node>
  <node id="33878" label="RCJ30949_5" cy:nodeId="214">
    <graphics x="-723.6841719858635" z="0.0" y="-1275.9211583083559"/>
  </node>
  <node id="32456" label="WP_146082522_3" cy:nodeId="31958">
    <graphics x="299.8917902819305" z="0.0" y="2440.8152105881486"/>
  </node>
  <node id="33862" label="WP_009343975_4" cy:nodeId="246">
    <graphics x="-356.4671052019397" z="0.0" y="-1264.890376027866"/>
  </node>
  <node id="32435" label="WP_156664522_1" cy:nodeId="31990">
    <graphics x="1430.0663126818329" z="0.0" y="2548.5373785568986"/>
  </node>
  <node id="32810" label="WP_124271963_3" cy:nodeId="30998">
    <graphics x="1864.7015928505732" z="0.0" y="643.130163003943"/>
  </node>
  <node id="33831" label="WP_099068319_5" cy:nodeId="310">
    <graphics x="-833.6023776419742" z="0.0" y="-1176.261883385381"/>
  </node>
  <node id="32392" label="WP_124142959_2" cy:nodeId="32054">
    <graphics x="-656.52787982305" z="0.0" y="2701.263605363539"/>
  </node>
  <node id="33529" label="WP_059262025_2" cy:nodeId="1366">
    <graphics x="-710.1217422478594" z="0.0" y="119.40597459862457"/>
  </node>
  <node id="33345" label="WP_104291723_4" cy:nodeId="3414">
    <graphics x="-1215.5175883171266" z="0.0" y="-435.9199327436861"/>
  </node>
  <node id="32970" label="WP_073726342_2" cy:nodeId="30038">
    <graphics x="2053.8226949827304" z="0.0" y="-1329.840886446839"/>
  </node>
  <node id="32371" label="WP_109497443_6" cy:nodeId="32086">
    <graphics x="473.6466425768524" z="0.0" y="2808.985773332289"/>
  </node>
  <node id="33800" label="WP_066371470_1" cy:nodeId="374">
    <graphics x="-481.5443979103811" z="0.0" y="22.181812378309957"/>
  </node>
  <node id="33338" label="WP_019501955_9" cy:nodeId="3446">
    <graphics x="-853.4674086254953" z="0.0" y="-1266.127870275948"/>
  </node>
  <node id="33790" label="WP_015207763_1" cy:nodeId="406">
    <graphics x="-807.2197739031685" z="0.0" y="-1086.7194477949122"/>
  </node>
  <node id="32328" label="WP_052808529_3" cy:nodeId="32150">
    <graphics x="-1583.684949982962" z="0.0" y="2908.985773332289"/>
  </node>
  <node id="32307" label="WP_084520237_4" cy:nodeId="32182">
    <graphics x="-453.5104275830597" z="0.0" y="3016.707941301039"/>
  </node>
  <node id="33515" label="WP_012409362_9" cy:nodeId="1494">
    <graphics x="-472.58047419859145" z="0.0" y="-1289.7840718954865"/>
  </node>
  <node id="33745" label="WP_104258544_2" cy:nodeId="502">
    <graphics x="-1084.008197268494" z="0.0" y="-196.79778238843465"/>
  </node>
  <node id="32264" label="WP_096594214_1" cy:nodeId="32246">
    <graphics x="1712.8735216967254" z="0.0" y="2908.985773332289"/>
  </node>
  <node id="33501" label="WP_019496925_1" cy:nodeId="1558">
    <graphics x="-952.1410336686229" z="0.0" y="-1300.222915660084"/>
  </node>
  <node id="32749" label="WP_027402982_3" cy:nodeId="31254">
    <graphics x="775.3739973577265" z="0.0" y="1118.9323764527821"/>
  </node>
  <node id="33058" label="WP_012409787_2" cy:nodeId="29238">
    <graphics x="783.4533655380153" z="0.0" y="-1351.325144888038"/>
  </node>
  <node id="32740" label="WP_052479947_4" cy:nodeId="31286">
    <graphics x="470.17259394193593" z="0.0" y="1221.9797957579194"/>
  </node>
  <node id="33700" label="WP_096575011_4" cy:nodeId="630">
    <graphics x="-718.8141353477545" z="0.0" y="-1265.4001117162004"/>
  </node>
  <node id="32927" label="WP_096679519_5" cy:nodeId="30358">
    <graphics x="-1662.9087287829852" z="0.0" y="576.7295746323855"/>
  </node>
  <node id="32922" label="WP_162681093_4" cy:nodeId="30390">
    <graphics x="-300.7647415950553" z="0.0" y="581.6344902209541"/>
  </node>
  <node id="32702" label="WP_012409237_1" cy:nodeId="31414">
    <graphics x="1640.379965624035" z="0.0" y="1113.5714812396764"/>
  </node>
  <node id="33480" label="WP_012409362_2" cy:nodeId="1750">
    <graphics x="-640.0048955291561" z="0.0" y="-1290.4469880465947"/>
  </node>
  <node id="33662" label="WP_019501037_1" cy:nodeId="758">
    <graphics x="-1022.1335641190806" z="0.0" y="-1159.08872518341"/>
  </node>
  <node id="32680" label="WP_109741224_4" cy:nodeId="31478">
    <graphics x="208.7569508582019" z="0.0" y="1607.6799596733276"/>
  </node>
  <node id="33653" label="WP_106300787_1" cy:nodeId="790">
    <graphics x="-1035.1370732037751" z="0.0" y="-1373.7112832097516"/>
  </node>
  <node id="33107" label="WP_106237513_1" cy:nodeId="27414">
    <graphics x="-796.048408571543" z="0.0" y="-945.8512680753656"/>
  </node>
  <node id="33090" label="WP_026093360_1" cy:nodeId="28438">
    <graphics x="449.2771761154079" z="0.0" y="-1343.0590692769235"/>
  </node>
  <node id="33021" label="WP_012597836_1" cy:nodeId="29462">
    <graphics x="1258.9885675643816" z="0.0" y="-1328.0630594502634"/>
  </node>
  <node id="33074" label="RCJ31639_2" cy:nodeId="28470">
    <graphics x="504.39852926482195" z="0.0" y="-1406.5972162495798"/>
  </node>
  <node id="33621" label="WP_068385845_2" cy:nodeId="886">
    <graphics x="-873.6754469452125" z="0.0" y="-1164.6191723261325"/>
  </node>
  <node id="33371" label="WP_138689268_2" cy:nodeId="2934">
    <graphics x="-1212.218492046837" z="0.0" y="-184.94876724141685"/>
  </node>
  <node id="32629" label="WP_096597905_1" cy:nodeId="31606">
    <graphics x="-1042.0919489478915" z="0.0" y="1949.11858035564"/>
  </node>
  <node id="33608" label="WP_105222244_3" cy:nodeId="918">
    <graphics x="-1015.0516021109931" z="0.0" y="-1010.1466903985889"/>
  </node>
  <node id="32616" label="WP_166925083_1" cy:nodeId="31638">
    <graphics x="1879.2151041708148" z="0.0" y="1611.6454549491236"/>
  </node>
  <node id="32883" label="WP_161483240_3" cy:nodeId="30646">
    <graphics x="342.88992912027675" z="0.0" y="869.2747642688057"/>
  </node>
  <node id="32574" label="WP_027402982_4" cy:nodeId="31734">
    <graphics x="1122.085392171434" z="0.0" y="1912.6283082428022"/>
  </node>
  <node id="33587" label="ANI93503_1" cy:nodeId="1047">
    <graphics x="-841.8839443048572" z="0.0" y="-12.666001690412116"/>
  </node>
  <node id="32557" label="BAZ80283_3" cy:nodeId="31767">
    <graphics x="2330.9573289695295" z="0.0" y="2008.4467172088666"/>
  </node>
  <node id="32856" label="WP_088612422_3" cy:nodeId="30775">
    <graphics x="1525.530048263754" z="0.0" y="575.3461575247036"/>
  </node>
  <node id="32541" label="WP_084520237_5" cy:nodeId="31799">
    <graphics x="-973.615276444754" z="0.0" y="2161.6212484909806"/>
  </node>
  <node id="33360" label="WP_051707308_1" cy:nodeId="3191">
    <graphics x="-716.9974648460275" z="0.0" y="4.446456182945809"/>
  </node>
  <node id="32507" label="WP_006622760_6" cy:nodeId="31863">
    <graphics x="1350.889787565866" z="0.0" y="2268.1083090378556"/>
  </node>
  <node id="33551" label="WP_166841243_1" cy:nodeId="1175">
    <graphics x="-1084.157236929482" z="0.0" y="-411.7968856437718"/>
  </node>
  <node id="32491" label="WP_055472496_2" cy:nodeId="31895">
    <graphics x="2462.405862700143" z="0.0" y="2200.4327108933244"/>
  </node>
  <node id="32993" label="WP_096536886_2" cy:nodeId="29879">
    <graphics x="1512.8499262069597" z="0.0" y="-1365.313311220283"/>
  </node>
  <node id="32829" label="WP_042407705_1" cy:nodeId="30903">
    <graphics x="-1492.1942149191275" z="0.0" y="1108.2748273083853"/>
  </node>
  <node id="32475" label="WP_052158149_1" cy:nodeId="31927">
    <graphics x="-728.5491295941681" z="0.0" y="2440.8152105881486"/>
  </node>
  <node id="32821" label="WP_141754588_2" cy:nodeId="30935">
    <graphics x="2229.293304372585" z="0.0" y="740.865573679255"/>
  </node>
  <node id="32434" label="WP_156664522_2" cy:nodeId="31991">
    <graphics x="1433.083764921823" z="0.0" y="2440.8152105881486"/>
  </node>
  <node id="33846" label="WP_087542717_3" cy:nodeId="279">
    <graphics x="-973.3068613888743" z="0.0" y="-1124.6580563784407"/>
  </node>
  <node id="33281" label="WP_104387267_4" cy:nodeId="5399">
    <graphics x="-310.875671931571" z="0.0" y="-1339.148266257154"/>
  </node>
  <node id="33252" label="WP_086760950_7" cy:nodeId="6423">
    <graphics x="-1006.6071149831103" z="0.0" y="-1382.959645809973"/>
  </node>
  <node id="32413" label="TKB91729_6" cy:nodeId="32023">
    <graphics x="-1689.7198544629425" z="0.0" y="2808.985773332289"/>
  </node>
  <node id="33815" label="AVH79607_2" cy:nodeId="343">
    <graphics x="-1078.1153532900787" z="0.0" y="-1190.7880801979516"/>
  </node>
  <node id="33344" label="AFR27446_1" cy:nodeId="3415">
    <graphics x="-1008.8821637907174" z="0.0" y="-422.9024848475009"/>
  </node>
  <node id="33115" label="WP_103138325_5" cy:nodeId="24919">
    <graphics x="-1442.833990676649" z="0.0" y="-1484.571484639211"/>
  </node>
  <node id="33066" label="WP_066380047_1" cy:nodeId="29015">
    <graphics x="391.6868059371852" z="0.0" y="-1400.6867548237985"/>
  </node>
  <node id="32370" label="WP_109497443_5" cy:nodeId="32087">
    <graphics x="476.66409481684263" z="0.0" y="2701.263605363539"/>
  </node>
  <node id="32789" label="WP_062348671_1" cy:nodeId="31095">
    <graphics x="-678.379358921336" z="0.0" y="1233.5108822679774"/>
  </node>
  <node id="32349" label="WP_087103312_1" cy:nodeId="32119">
    <graphics x="1606.838617216745" z="0.0" y="2808.985773332289"/>
  </node>
  <node id="33127" label="WP_016864763_4" cy:nodeId="18839">
    <graphics x="-1125.7446617732933" z="0.0" y="-1079.7684441285853"/>
  </node>
  <node id="33776" label="WP_086760950_11" cy:nodeId="439">
    <graphics x="-1025.81126344492" z="0.0" y="-1326.6102488804206"/>
  </node>
  <node id="32306" label="WP_068028504_4" cy:nodeId="32183">
    <graphics x="-450.4929753430695" z="0.0" y="2908.985773332289"/>
  </node>
  <node id="33760" label="WP_157846946_2" cy:nodeId="471">
    <graphics x="-1042.4111306747297" z="0.0" y="-160.06375430807273"/>
  </node>
  <node id="32960" label="WP_013190203_3" cy:nodeId="30167">
    <graphics x="-792.2672597058624" z="0.0" y="733.2059366776261"/>
  </node>
  <node id="32285" label="WP_125690181_2" cy:nodeId="32215">
    <graphics x="679.6815470568329" z="0.0" y="3016.707941301039"/>
  </node>
  <node id="33110" label="AFY52807_2" cy:nodeId="27127">
    <graphics x="-657.0835869106518" z="0.0" y="-1033.617289561971"/>
  </node>
  <node id="33729" label="ANS68054_1" cy:nodeId="535">
    <graphics x="-974.9525049989686" z="0.0" y="-123.93234866861056"/>
  </node>
  <node id="32937" label="WP_168643398_8" cy:nodeId="30231">
    <graphics x="-1684.3643867419696" z="0.0" y="648.247763108948"/>
  </node>
  <node id="33721" label="AWS47415_2" cy:nodeId="567">
    <graphics x="-976.7498735722263" z="0.0" y="-183.50513162781752"/>
  </node>
  <node id="33495" label="WP_066371470_4" cy:nodeId="1591">
    <graphics x="-490.6669683910086" z="0.0" y="-103.6885152489763"/>
  </node>
  <node id="32930" label="WP_019501037_4" cy:nodeId="30263">
    <graphics x="-1534.2604133532975" z="0.0" y="638.6426910874636"/>
  </node>
  <node id="33711" label="WP_051708270_2" cy:nodeId="599">
    <graphics x="-1028.1038825684452" z="0.0" y="-229.3596877748848"/>
  </node>
  <node id="33046" label="BAZ33272_2" cy:nodeId="29271">
    <graphics x="657.0900385116481" z="0.0" y="-1352.3908110867685"/>
  </node>
  <node id="33693" label="WP_062295185_6" cy:nodeId="663">
    <graphics x="-635.6225324173276" z="0.0" y="-1161.8862215370352"/>
  </node>
  <node id="33673" label="WP_096537472_2" cy:nodeId="727">
    <graphics x="-879.578057112375" z="0.0" y="-1192.6111136392753"/>
  </node>
  <node id="33472" label="TAE59458_6" cy:nodeId="1815">
    <graphics x="-313.2621099423553" z="0.0" y="-1446.9175690660084"/>
  </node>
  <node id="33458" label="WP_143043955_1" cy:nodeId="1847">
    <graphics x="-865.7697694979951" z="0.0" y="-271.57247615911785"/>
  </node>
  <node id="33119" label="WP_010996095_4" cy:nodeId="23351">
    <graphics x="-388.85273145089684" z="0.0" y="-1468.0506555882346"/>
  </node>
  <node id="33634" label="WP_096580419_3" cy:nodeId="855">
    <graphics x="-907.1552372490685" z="0.0" y="-1085.3245385358057"/>
  </node>
  <node id="33262" label="WP_012868258_2" cy:nodeId="5975">
    <graphics x="-918.0243061723529" z="0.0" y="-83.13346924327791"/>
  </node>
  <node id="32899" label="WP_020634200_1" cy:nodeId="30551">
    <graphics x="-59.89222114827794" z="0.0" y="668.9585869006416"/>
  </node>
  <node id="33235" label="WP_096559014_3" cy:nodeId="7031">
    <graphics x="-756.4273910704937" z="0.0" y="-1196.2597902581508"/>
  </node>
  <node id="32615" label="WP_047775239_2" cy:nodeId="31639">
    <graphics x="1980.9989634237445" z="0.0" y="1570.4913411795924"/>
  </node>
  <node id="32879" label="WP_030452416_4" cy:nodeId="30679">
    <graphics x="363.4281523868783" z="0.0" y="590.7484428576729"/>
  </node>
  <node id="32588" label="WP_104387267_2" cy:nodeId="31703">
    <graphics x="-710.0664664266487" z="0.0" y="2006.8190474628211"/>
  </node>
  <node id="32573" label="WP_148763415_4" cy:nodeId="31735">
    <graphics x="1228.8457128348862" z="0.0" y="1927.3754395904584"/>
  </node>
  <node id="32866" label="WP_137906310_2" cy:nodeId="30744">
    <graphics x="831.0105879947885" z="0.0" y="584.970267503669"/>
  </node>
  <node id="33440" label="AVH79628_2" cy:nodeId="2104">
    <graphics x="-1052.768000661599" z="0.0" y="-1189.5387928367888"/>
  </node>
  <node id="32540" label="PIR21572_3" cy:nodeId="31800">
    <graphics x="-866.8549557813019" z="0.0" y="2176.368379838637"/>
  </node>
  <node id="33941" label="WP_096559014_5" cy:nodeId="88">
    <graphics x="-687.3755067698362" z="0.0" y="-1209.80118591736"/>
  </node>
  <node id="33565" label="WP_015216084_4" cy:nodeId="1112">
    <graphics x="-857.4548068643479" z="0.0" y="-1288.5756671139568"/>
  </node>
  <node id="33258" label="WP_052269673_4" cy:nodeId="6232">
    <graphics x="-341.1442868648094" z="0.0" y="-144.5649417142038"/>
  </node>
  <node id="33925" label="WP_096559014_4" cy:nodeId="120">
    <graphics x="-723.5830607973326" z="0.0" y="-1231.493439979229"/>
  </node>
  <node id="33559" label="WP_017314970_3" cy:nodeId="1144">
    <graphics x="-834.2900729760576" z="0.0" y="-1215.8764257242035"/>
  </node>
  <node id="33909" label="WP_096575011_3" cy:nodeId="152">
    <graphics x="-667.2074868256746" z="0.0" y="-1288.900796804304"/>
  </node>
  <node id="32999" label="TAE59458_4" cy:nodeId="29848">
    <graphics x="1743.0160257553" z="0.0" y="-1293.9843622456735"/>
  </node>
  <node id="33893" label="TVP62740_6" cy:nodeId="184">
    <graphics x="-629.2902950257114" z="0.0" y="-1215.8029446410544"/>
  </node>
  <node id="32474" label="WP_141683807_1" cy:nodeId="31928">
    <graphics x="-621.788808930716" z="0.0" y="2455.562341935805"/>
  </node>
  <node id="33877" label="WP_099071810_6" cy:nodeId="216">
    <graphics x="-726.9268786332391" z="0.0" y="-1291.4637940838763"/>
  </node>
  <node id="32820" label="WP_107501676_2" cy:nodeId="30936">
    <graphics x="2309.8527373559837" z="0.0" y="651.2230947363839"/>
  </node>
  <node id="32455" label="WP_069110514_3" cy:nodeId="31960">
    <graphics x="399.8917902819305" z="0.0" y="2548.5373785568986"/>
  </node>
  <node id="33861" label="WP_168465654_4" cy:nodeId="248">
    <graphics x="-369.4887117740285" z="0.0" y="-1330.1903609261096"/>
  </node>
  <node id="33539" label="WP_106300787_3" cy:nodeId="1304">
    <graphics x="-1137.092217183643" z="0.0" y="-1375.4823889406578"/>
  </node>
  <node id="33351" label="TVP62740_3" cy:nodeId="3352">
    <graphics x="-815.3637428283978" z="0.0" y="-1198.9875610313209"/>
  </node>
  <node id="32809" label="WP_126393842_3" cy:nodeId="31000">
    <graphics x="1987.7328123329949" z="0.0" y="741.4591119785524"/>
  </node>
  <node id="32412" label="TKB91729_3" cy:nodeId="32024">
    <graphics x="-1686.7024022229523" z="0.0" y="2701.263605363539"/>
  </node>
  <node id="32391" label="WP_073619916_3" cy:nodeId="32056">
    <graphics x="-556.52787982305" z="0.0" y="2808.985773332289"/>
  </node>
  <node id="33799" label="WP_062339008_2" cy:nodeId="376">
    <graphics x="-555.379921168985" z="0.0" y="-120.96893984560191"/>
  </node>
  <node id="32348" label="WP_067598320_1" cy:nodeId="32120">
    <graphics x="1609.8560694567352" z="0.0" y="2701.263605363539"/>
  </node>
  <node id="33276" label="WP_114082527_6" cy:nodeId="5528">
    <graphics x="-691.96626072147" z="0.0" y="-1165.0944009697594"/>
  </node>
  <node id="32327" label="WP_016950293_2" cy:nodeId="32152">
    <graphics x="-1483.684949982962" z="0.0" y="3016.707941301039"/>
  </node>
  <node id="33521" label="WP_012409362_8" cy:nodeId="1464">
    <graphics x="-670.831197184481" z="0.0" y="-1289.6184185591007"/>
  </node>
  <node id="32775" label="WP_168465654_6" cy:nodeId="31160">
    <graphics x="-1052.8669886659552" z="0.0" y="1214.091924314814"/>
  </node>
  <node id="32284" label="WP_123798532_3" cy:nodeId="32216">
    <graphics x="682.6989992968231" z="0.0" y="2908.985773332289"/>
  </node>
  <node id="33744" label="WP_170198719_1" cy:nodeId="504">
    <graphics x="-946.1486950502374" z="0.0" y="-137.96906600674882"/>
  </node>
  <node id="32948" label="WP_012409362_10" cy:nodeId="30200">
    <graphics x="-1199.4597035535187" z="0.0" y="913.8194773270402"/>
  </node>
  <node id="32263" label="AWS47415_1" cy:nodeId="32248">
    <graphics x="1812.8735216967254" z="0.0" y="3016.707941301039"/>
  </node>
  <node id="33331" label="WP_086760950_9" cy:nodeId="3640">
    <graphics x="-1039.1333674046612" z="0.0" y="-1198.8191757518978"/>
  </node>
  <node id="33057" label="WP_104899482_3" cy:nodeId="29240">
    <graphics x="744.7207452987575" z="0.0" y="-1263.5814009915537"/>
  </node>
  <node id="32739" label="WP_078077257_2" cy:nodeId="31288">
    <graphics x="518.4323595669359" z="0.0" y="1282.5400984922944"/>
  </node>
  <node id="33394" label="WP_015207763_6" cy:nodeId="2648">
    <graphics x="-753.9641305997206" z="0.0" y="-1074.9886260674282"/>
  </node>
  <node id="32721" label="WP_148763415_3" cy:nodeId="31352">
    <graphics x="2117.266795241953" z="0.0" y="1112.4769619798917"/>
  </node>
  <node id="33272" label="WP_013321440_1" cy:nodeId="5784">
    <graphics x="-944.6143857225823" z="0.0" y="-1123.0272120862098"/>
  </node>
  <node id="33040" label="WP_073591536_5" cy:nodeId="29336">
    <graphics x="792.916912290945" z="0.0" y="-1177.7794142972177"/>
  </node>
  <node id="32713" label="WP_103138934_3" cy:nodeId="31384">
    <graphics x="2432.397294044682" z="0.0" y="1118.9323764527824"/>
  </node>
  <node id="32921" label="WP_016898474_1" cy:nodeId="30392">
    <graphics x="-303.5726334407584" z="0.0" y="718.5447914294502"/>
  </node>
  <node id="33661" label="RCJ19623_5" cy:nodeId="760">
    <graphics x="-1160.7499736167667" z="0.0" y="-1361.6920789344765"/>
  </node>
  <node id="32679" label="WP_122933410_1" cy:nodeId="31480">
    <graphics x="287.50914812382683" z="0.0" y="1532.1571630424683"/>
  </node>
  <node id="33089" label="WP_013190653_1" cy:nodeId="28440">
    <graphics x="399.4320604537868" z="0.0" y="-1325.3069025288767"/>
  </node>
  <node id="33020" label="WP_096589596_2" cy:nodeId="29464">
    <graphics x="1309.8088495468025" z="0.0" y="-1324.7931238423532"/>
  </node>
  <node id="33073" label="WP_071187741_1" cy:nodeId="28472">
    <graphics x="462.59953329314226" z="0.0" y="-1416.0239435445017"/>
  </node>
  <node id="32908" label="WP_103031749_1" cy:nodeId="30520">
    <graphics x="-375.7067124202506" z="0.0" y="639.1763908557198"/>
  </node>
  <node id="32656" label="WP_062348671_5" cy:nodeId="31544">
    <graphics x="-1092.1218775185976" z="0.0" y="1574.0361050462977"/>
  </node>
  <node id="33370" label="WP_153461219_2" cy:nodeId="2936">
    <graphics x="-907.267506046767" z="0.0" y="-162.15771052023663"/>
  </node>
  <node id="32628" label="WP_105222244_4" cy:nodeId="31608">
    <graphics x="-962.1335749244539" z="0.0" y="1995.6788449430423"/>
  </node>
  <node id="33598" label="WP_087542717_5" cy:nodeId="952">
    <graphics x="-887.662538025207" z="0.0" y="-1208.655983791006"/>
  </node>
  <node id="32882" label="WP_131969051_3" cy:nodeId="30648">
    <graphics x="400.5133116886361" z="0.0" y="795.2452690295479"/>
  </node>
  <node id="32602" label="WP_060892878_1" cy:nodeId="31672">
    <graphics x="-1523.9113128912995" z="0.0" y="2007.175345432639"/>
  </node>
  <node id="33288" label="WP_035150190_2" cy:nodeId="5080">
    <graphics x="-1021.8649709385052" z="0.0" y="-1157.2395230864238"/>
  </node>
  <node id="32878" label="WP_062437448_4" cy:nodeId="30680">
    <graphics x="389.9173796818002" z="0.0" y="721.0982353381416"/>
  </node>
  <node id="33586" label="ANI93503_6" cy:nodeId="1049">
    <graphics x="-864.5396145516651" z="0.0" y="17.963243523461102"/>
  </node>
  <node id="33311" label="WP_096580419_2" cy:nodeId="4121">
    <graphics x="-947.7404267100198" z="0.0" y="-1344.3748245944332"/>
  </node>
  <node id="32556" label="WP_008180360_1" cy:nodeId="31769">
    <graphics x="2411.5910855508573" z="0.0" y="1912.6283082428022"/>
  </node>
  <node id="33573" label="WP_141936425_2" cy:nodeId="1081">
    <graphics x="-776.2650793510486" z="0.0" y="-133.85481221738772"/>
  </node>
  <node id="32523" label="SFK92261_4" cy:nodeId="31833">
    <graphics x="354.41201580683287" z="0.0" y="2247.844827897719"/>
  </node>
  <node id="33136" label="WP_084520237_1" cy:nodeId="17529">
    <graphics x="-1008.1122735675533" z="0.0" y="130.5798936712903"/>
  </node>
  <node id="32841" label="WP_052856102_1" cy:nodeId="30841">
    <graphics x="1212.5206822053792" z="0.0" y="682.1292697515006"/>
  </node>
  <node id="32506" label="WP_006622760_4" cy:nodeId="31865">
    <graphics x="1434.80614651362" z="0.0" y="2200.4327108933244"/>
  </node>
  <node id="33550" label="WP_091465037_2" cy:nodeId="1177">
    <graphics x="-1057.0656050006157" z="0.0" y="-374.83871672515556"/>
  </node>
  <node id="32992" label="WP_015210601_1" cy:nodeId="29881">
    <graphics x="1628.9622957443137" z="0.0" y="-1427.4581476460642"/>
  </node>
  <node id="32454" label="WP_116947187_3" cy:nodeId="31961">
    <graphics x="402.90924252192076" z="0.0" y="2440.8152105881486"/>
  </node>
  <node id="32433" label="WP_079291565_3" cy:nodeId="31993">
    <graphics x="1533.083764921823" z="0.0" y="2548.5373785568986"/>
  </node>
  <node id="33845" label="WP_163927072_1" cy:nodeId="281">
    <graphics x="-928.067052808269" z="0.0" y="-1373.710794564762"/>
  </node>
  <node id="33218" label="WP_133890759_4" cy:nodeId="7449">
    <graphics x="-1023.9370304918491" z="0.0" y="-76.34925501802948"/>
  </node>
  <node id="32808" label="WP_031017311_4" cy:nodeId="31001">
    <graphics x="2111.135987686999" z="0.0" y="702.1634729404665"/>
  </node>
  <node id="33830" label="WP_087542717_2" cy:nodeId="313">
    <graphics x="-962.5214981450979" z="0.0" y="-1215.056580821594"/>
  </node>
  <node id="32390" label="WP_073619916_2" cy:nodeId="32057">
    <graphics x="-553.5104275830597" z="0.0" y="2701.263605363539"/>
  </node>
  <node id="33814" label="WP_138499827_4" cy:nodeId="345">
    <graphics x="-1012.2035196862114" z="0.0" y="-1273.2010088614368"/>
  </node>
  <node id="33528" label="WP_073726342_1" cy:nodeId="1369">
    <graphics x="-933.7162283964797" z="0.0" y="-224.1192950916363"/>
  </node>
  <node id="32794" label="WP_141366901_2" cy:nodeId="31065">
    <graphics x="-1231.424524415335" z="0.0" y="1136.736423738173"/>
  </node>
  <node id="32369" label="WP_162060722_3" cy:nodeId="32089">
    <graphics x="576.6640948168426" z="0.0" y="2808.985773332289"/>
  </node>
  <node id="33413" label="WP_061955677_1" cy:nodeId="2425">
    <graphics x="-1093.191399485536" z="0.0" y="-523.4071131931619"/>
  </node>
  <node id="33337" label="WP_017749323_2" cy:nodeId="3449">
    <graphics x="-889.1476224019706" z="0.0" y="-1205.109296026483"/>
  </node>
  <node id="32788" label="WP_030452416_1" cy:nodeId="31097">
    <graphics x="-810.6367746928205" z="0.0" y="1190.0583523607509"/>
  </node>
  <node id="32326" label="WP_127056592_3" cy:nodeId="32153">
    <graphics x="-1480.6674977429718" z="0.0" y="2908.985773332289"/>
  </node>
  <node id="33775" label="WP_099700413_4" cy:nodeId="441">
    <graphics x="-904.144839400279" z="0.0" y="-1176.1566088933794"/>
  </node>
  <node id="33336" label="WP_045870710_1" cy:nodeId="3513">
    <graphics x="-1064.7154455910488" z="0.0" y="-1115.2792501228575"/>
  </node>
  <node id="32305" label="WP_067652746_4" cy:nodeId="32185">
    <graphics x="-350.4929753430695" z="0.0" y="3016.707941301039"/>
  </node>
  <node id="33759" label="WP_055704502_1" cy:nodeId="473">
    <graphics x="-1109.7576524958365" z="0.0" y="-226.44408100672328"/>
  </node>
  <node id="32959" label="WP_057178590_7" cy:nodeId="30169">
    <graphics x="-624.7098256238312" z="0.0" y="862.3369753433976"/>
  </node>
  <node id="33506" label="WP_163927072_2" cy:nodeId="1529">
    <graphics x="-993.8633607184445" z="0.0" y="-1313.7031568962445"/>
  </node>
  <node id="32262" label="SNT25203_2" cy:nodeId="32249">
    <graphics x="1815.8909739367157" z="0.0" y="2908.985773332289"/>
  </node>
  <node id="33728" label="WP_017198207_2" cy:nodeId="537">
    <graphics x="-1079.070903188281" z="0.0" y="-70.38346806573693"/>
  </node>
  <node id="33500" label="WP_124970176_9" cy:nodeId="1561">
    <graphics x="-932.8833323312272" z="0.0" y="-1250.4826487467687"/>
  </node>
  <node id="32748" label="WP_168465654_2" cy:nodeId="31257">
    <graphics x="788.9953962835077" z="0.0" y="1266.293201037743"/>
  </node>
  <node id="33720" label="WP_052680420_1" cy:nodeId="569">
    <graphics x="-1021.473236395185" z="0.0" y="-165.0981607472411"/>
  </node>
  <node id="33056" label="TVP63782_3" cy:nodeId="29241">
    <graphics x="727.1441919540309" z="0.0" y="-1341.157679678077"/>
  </node>
  <node id="33148" label="WP_057178590_3" cy:nodeId="14969">
    <graphics x="-696.5618153912069" z="0.0" y="-1229.4699523036431"/>
  </node>
  <node id="32712" label="WP_096561092_3" cy:nodeId="31385">
    <graphics x="2499.2098245622597" z="0.0" y="1200.752220698693"/>
  </node>
  <node id="33682" label="WP_006195640_9" cy:nodeId="697">
    <graphics x="-697.0007986871346" z="0.0" y="-1225.800287548878"/>
  </node>
  <node id="33383" label="WP_137451632_2" cy:nodeId="2745">
    <graphics x="-934.0363227689747" z="0.0" y="-222.23846382412626"/>
  </node>
  <node id="33479" label="WP_114082527_2" cy:nodeId="1753">
    <graphics x="-726.1218726144575" z="0.0" y="-1275.5189178750331"/>
  </node>
  <node id="33375" label="WP_015155263_1" cy:nodeId="2777">
    <graphics x="-762.0140751702415" z="0.0" y="-1312.1576959645206"/>
  </node>
  <node id="33105" label="WP_096559440_1" cy:nodeId="28409">
    <graphics x="449.19239828337663" z="0.0" y="-1435.7646356831735"/>
  </node>
  <node id="33036" label="WP_012409787_1" cy:nodeId="29433">
    <graphics x="1281.1665765975838" z="0.0" y="-1353.059176088447"/>
  </node>
  <node id="32909" label="WP_088679810_1" cy:nodeId="30489">
    <graphics x="-369.0248581722037" z="0.0" y="707.0465919665596"/>
  </node>
  <node id="33643" label="WP_139979956_2" cy:nodeId="825">
    <graphics x="-1127.7069001211437" z="0.0" y="159.58737485683505"/>
  </node>
  <node id="33457" label="WP_062295185_3" cy:nodeId="1849">
    <graphics x="-735.4975836524095" z="0.0" y="-1290.6062952113168"/>
  </node>
  <node id="33269" label="WP_089126836_1" cy:nodeId="5945">
    <graphics x="-1013.8314922033157" z="0.0" y="-1568.0553414024942"/>
  </node>
  <node id="33111" label="WP_168643398_9" cy:nodeId="26425">
    <graphics x="-972.7121144422842" z="0.0" y="-1245.0867468762624"/>
  </node>
  <node id="32655" label="WP_030452416_5" cy:nodeId="31545">
    <graphics x="-971.0992334756288" z="0.0" y="1619.300944218661"/>
  </node>
  <node id="32898" label="WP_131980220_1" cy:nodeId="30553">
    <graphics x="19.18596488687831" z="0.0" y="570.2214653186104"/>
  </node>
  <node id="32642" label="BAZ15600_3" cy:nodeId="31577">
    <graphics x="-1842.9372372628943" z="0.0" y="1932.8773707272028"/>
  </node>
  <node id="33607" label="WP_106240815_1" cy:nodeId="921">
    <graphics x="-888.1292856197969" z="0.0" y="-1112.0987307984212"/>
  </node>
  <node id="32601" label="WP_015659226_3" cy:nodeId="31673">
    <graphics x="-1532.367260767276" z="0.0" y="1880.3512358783482"/>
  </node>
  <node id="32876" label="WP_168501874_1" cy:nodeId="30713">
    <graphics x="840.8301680729135" z="0.0" y="681.539229600837"/>
  </node>
  <node id="32572" label="WP_168645325_5" cy:nodeId="31737">
    <graphics x="1162.679033452562" z="0.0" y="2012.4823731842084"/>
  </node>
  <node id="32555" label="WP_008180360_2" cy:nodeId="31770">
    <graphics x="2447.1845952249296" z="0.0" y="2014.370434707646"/>
  </node>
  <node id="32539" label="WP_068028504_5" cy:nodeId="31802">
    <graphics x="-933.0216351636261" z="0.0" y="2261.475313432387"/>
  </node>
  <node id="33940" label="BAZ29283_1" cy:nodeId="90">
    <graphics x="-732.9886288889388" z="0.0" y="-1172.2337325548467"/>
  </node>
  <node id="32522" label="WP_125792341_3" cy:nodeId="31834">
    <graphics x="288.3572367540985" z="0.0" y="2161.6212484909806"/>
  </node>
  <node id="33924" label="WP_013190203_1" cy:nodeId="122">
    <graphics x="-796.2397418181931" z="0.0" y="-1265.9408734376373"/>
  </node>
  <node id="33183" label="AVH79535_3" cy:nodeId="10362">
    <graphics x="-1037.5436888367105" z="0.0" y="-1490.1154647255496"/>
  </node>
  <node id="33908" label="WP_168496018_1" cy:nodeId="154">
    <graphics x="-788.2149087644352" z="0.0" y="-1298.1046053569478"/>
  </node>
  <node id="32998" label="WP_071189061_1" cy:nodeId="29850">
    <graphics x="1691.0008203719992" z="0.0" y="-1397.304766298408"/>
  </node>
  <node id="32490" label="WP_051837683_7" cy:nodeId="31898">
    <graphics x="-1792.7373067029328" z="0.0" y="2440.8152105881486"/>
  </node>
  <node id="33892" label="WP_096681247_2" cy:nodeId="186">
    <graphics x="-765.2455511791918" z="0.0" y="-1186.4893346885399"/>
  </node>
  <node id="33142" label="OLE73832_2" cy:nodeId="15546">
    <graphics x="-674.277917707193" z="0.0" y="-928.8209566348405"/>
  </node>
  <node id="32473" label="WP_153354547_2" cy:nodeId="31930">
    <graphics x="-687.9554883130402" z="0.0" y="2540.669275529555"/>
  </node>
  <node id="33876" label="WP_066383651_4" cy:nodeId="218">
    <graphics x="-778.2827074682277" z="0.0" y="-1167.0645417513622"/>
  </node>
  <node id="33356" label="WP_006195640_6" cy:nodeId="3290">
    <graphics x="-716.4216524702783" z="0.0" y="-1276.46725148983"/>
  </node>
  <node id="33190" label="WP_019501955_3" cy:nodeId="9434">
    <graphics x="-1262.6511042697532" z="0.0" y="-1016.7541210615489"/>
  </node>
  <node id="32819" label="WP_078077257_1" cy:nodeId="30938">
    <graphics x="2356.7712840326194" z="0.0" y="712.9658620703685"/>
  </node>
  <node id="33860" label="WP_168501874_4" cy:nodeId="250">
    <graphics x="-406.5647588838177" z="0.0" y="-1336.703888302163"/>
  </node>
  <node id="33354" label="WP_096575011_7" cy:nodeId="3322">
    <graphics x="-686.1920852957696" z="0.0" y="-1319.9879420707764"/>
  </node>
  <node id="32432" label="WP_082604641_3" cy:nodeId="31994">
    <graphics x="1536.1012171618133" z="0.0" y="2440.8152105881486"/>
  </node>
  <node id="33538" label="BAZ42602_5" cy:nodeId="1306">
    <graphics x="-942.9772367876419" z="0.0" y="-1255.0050514546635"/>
  </node>
  <node id="32411" label="WP_155387558_1" cy:nodeId="32026">
    <graphics x="-1586.7024022229523" z="0.0" y="2808.985773332289"/>
  </node>
  <node id="32973" label="WP_031017311_1" cy:nodeId="30010">
    <graphics x="2118.419527258121" z="0.0" y="-1467.5221913784796"/>
  </node>
  <node id="32368" label="WP_110256027_2" cy:nodeId="32090">
    <graphics x="579.6815470568329" z="0.0" y="2701.263605363539"/>
  </node>
  <node id="33798" label="WP_066371470_7" cy:nodeId="378">
    <graphics x="-527.9175381704347" z="0.0" y="-21.17898766758171"/>
  </node>
  <node id="32347" label="WP_006196066_4" cy:nodeId="32122">
    <graphics x="1709.8560694567352" z="0.0" y="2808.985773332289"/>
  </node>
  <node id="32304" label="WP_062451377_3" cy:nodeId="32186">
    <graphics x="-347.47552310307924" z="0.0" y="2908.985773332289"/>
  </node>
  <node id="32283" label="WP_129202808_4" cy:nodeId="32218">
    <graphics x="782.6989992968231" z="0.0" y="3016.707941301039"/>
  </node>
  <node id="33743" label="WP_019505167_1" cy:nodeId="506">
    <graphics x="-1172.1004745301036" z="0.0" y="-1004.7711613327443"/>
  </node>
  <node id="33494" label="WP_062339008_1" cy:nodeId="1594">
    <graphics x="-429.79437787745815" z="0.0" y="-72.39024284631026"/>
  </node>
  <node id="33710" label="WP_089091039_1" cy:nodeId="602">
    <graphics x="-672.2359829084885" z="0.0" y="-1204.0673044149478"/>
  </node>
  <node id="33196" label="WP_019499235_4" cy:nodeId="8794">
    <graphics x="-1116.7479897487503" z="0.0" y="-1345.827690175054"/>
  </node>
  <node id="33043" label="RCJ40334_2" cy:nodeId="29306">
    <graphics x="768.9968988632106" z="0.0" y="-1225.2317458401865"/>
  </node>
  <node id="33386" label="WP_109595189_4" cy:nodeId="2714">
    <graphics x="-987.7934294163358" z="0.0" y="-48.82093912954454"/>
  </node>
  <node id="32920" label="WP_129202808_2" cy:nodeId="30394">
    <graphics x="-211.9539048030631" z="0.0" y="576.163985460212"/>
  </node>
  <node id="33170" label="WP_096688632_3" cy:nodeId="11994">
    <graphics x="-1026.7795465275697" z="0.0" y="-1246.6691585217084"/>
  </node>
  <node id="32691" label="WP_067652746_3" cy:nodeId="31450">
    <graphics x="-591.8780344135321" z="0.0" y="1646.0548212039002"/>
  </node>
  <node id="33660" label="AVH79456_4" cy:nodeId="762">
    <graphics x="-1054.235010467033" z="0.0" y="-1365.5338650996162"/>
  </node>
  <node id="33104" label="WP_015216396_1" cy:nodeId="28410">
    <graphics x="420.7770158981227" z="0.0" y="-1467.2978693257517"/>
  </node>
  <node id="33035" label="WP_086760950_2" cy:nodeId="29434">
    <graphics x="1197.0272943710222" z="0.0" y="-1402.7201410542673"/>
  </node>
  <node id="32678" label="WP_166551441_2" cy:nodeId="31482">
    <graphics x="285.6585621863268" z="0.0" y="1688.7736638969614"/>
  </node>
  <node id="33120" label="WP_016950446_6" cy:nodeId="23322">
    <graphics x="-461.7332510832051" z="0.0" y="-1262.9121704722818"/>
  </node>
  <node id="33088" label="RCJ34841_1" cy:nodeId="28442">
    <graphics x="352.74489614714616" z="0.0" y="-1414.8297296773142"/>
  </node>
  <node id="33019" label="WP_168643398_1" cy:nodeId="29466">
    <graphics x="1340.2468988632097" z="0.0" y="-1357.028933168525"/>
  </node>
  <node id="32666" label="WP_073644071_7" cy:nodeId="31514">
    <graphics x="-1244.6020763493937" z="0.0" y="1601.8280215943837"/>
  </node>
  <node id="33456" label="WP_127086205_5" cy:nodeId="1850">
    <graphics x="-999.8695800595149" z="0.0" y="-1258.733662314207"/>
  </node>
  <node id="33317" label="WP_167725682_1" cy:nodeId="3898">
    <graphics x="-793.2340146681813" z="0.0" y="-1283.132927139424"/>
  </node>
  <node id="33633" label="WP_035150190_4" cy:nodeId="858">
    <graphics x="-960.7139379984862" z="0.0" y="-1149.988985411317"/>
  </node>
  <node id="32641" label="WP_026093360_2" cy:nodeId="31578">
    <graphics x="-1714.8933987619178" z="0.0" y="1959.4749506832575"/>
  </node>
  <node id="33147" label="WP_124155194_1" cy:nodeId="15226">
    <graphics x="-962.2656595374854" z="0.0" y="-938.4785542983618"/>
  </node>
  <node id="33137" label="WP_015113151_2" cy:nodeId="17306">
    <graphics x="-1454.356018126797" z="0.0" y="-1759.315597925877"/>
  </node>
  <node id="32892" label="WP_039653089_1" cy:nodeId="30618">
    <graphics x="115.60967094156581" z="0.0" y="737.6254417590401"/>
  </node>
  <node id="32614" label="WP_037567380_1" cy:nodeId="31642">
    <graphics x="2080.9989634237445" z="0.0" y="1621.246849602444"/>
  </node>
  <node id="33597" label="WP_099068319_7" cy:nodeId="954">
    <graphics x="-847.0449408656267" z="0.0" y="-1207.7527727774757"/>
  </node>
  <node id="32881" label="WP_137248807_3" cy:nodeId="30650">
    <graphics x="351.863867108558" z="0.0" y="773.0111381701729"/>
  </node>
  <node id="32587" label="WP_027402982_5" cy:nodeId="31706">
    <graphics x="-743.4631949422737" z="0.0" y="1880.3512358783482"/>
  </node>
  <node id="32875" label="WP_168501874_2" cy:nodeId="30714">
    <graphics x="767.9225447818978" z="0.0" y="799.1088707141182"/>
  </node>
  <node id="33572" label="WP_071383933_2" cy:nodeId="1083">
    <graphics x="-881.2678547200857" z="0.0" y="-183.6216648018224"/>
  </node>
  <node id="33309" label="WP_151696789_1" cy:nodeId="4155">
    <graphics x="-869.2685092113378" z="0.0" y="-1290.2310922217619"/>
  </node>
  <node id="32489" label="WP_052680420_6" cy:nodeId="31899">
    <graphics x="-1757.1437970288605" z="0.0" y="2542.5573370529924"/>
  </node>
  <node id="32453" label="WP_051642643_1" cy:nodeId="31963">
    <graphics x="502.90924252192076" z="0.0" y="2548.5373785568986"/>
  </node>
  <node id="32410" label="WP_051837683_6" cy:nodeId="32027">
    <graphics x="-1583.684949982962" z="0.0" y="2701.263605363539"/>
  </node>
  <node id="33829" label="WP_103138325_3" cy:nodeId="315">
    <graphics x="-945.8931746114092" z="0.0" y="-1383.9368399997654"/>
  </node>
  <node id="32802" label="WP_091465037_3" cy:nodeId="31035">
    <graphics x="-1333.1121846326203" z="0.0" y="1261.4741900040422"/>
  </node>
  <node id="32389" label="WP_089126833_3" cy:nodeId="32059">
    <graphics x="-453.5104275830597" z="0.0" y="2808.985773332289"/>
  </node>
  <node id="33527" label="WP_054237388_4" cy:nodeId="1371">
    <graphics x="-816.3086289034918" z="0.0" y="14.390220155555113"/>
  </node>
  <node id="33198" label="WP_087592205_9" cy:nodeId="8571">
    <graphics x="-871.6410687023589" z="0.0" y="-1274.8045435709244"/>
  </node>
  <node id="32787" label="WP_062437448_1" cy:nodeId="31099">
    <graphics x="-723.4581858256329" z="0.0" y="1266.8366879320397"/>
  </node>
  <node id="32346" label="TVP62142_3" cy:nodeId="32123">
    <graphics x="1712.8735216967254" z="0.0" y="2701.263605363539"/>
  </node>
  <node id="32325" label="WP_093116829_1" cy:nodeId="32155">
    <graphics x="-1380.6674977429718" z="0.0" y="3016.707941301039"/>
  </node>
  <node id="33774" label="WP_096589596_10" cy:nodeId="443">
    <graphics x="-1118.8356556462534" z="0.0" y="-1223.9277042251376"/>
  </node>
  <node id="33758" label="WP_052856102_2" cy:nodeId="475">
    <graphics x="-960.3448325616998" z="0.0" y="-232.00109438939282"/>
  </node>
  <node id="32958" label="WP_009343975_3" cy:nodeId="30171">
    <graphics x="-603.4990712293" z="0.0" y="746.4914133621965"/>
  </node>
  <node id="32282" label="WP_106331017_1" cy:nodeId="32219">
    <graphics x="785.7164515368133" z="0.0" y="2908.985773332289"/>
  </node>
  <node id="33742" label="WP_019505167_3" cy:nodeId="507">
    <graphics x="-1101.0940407447345" z="0.0" y="-1033.5505080665641"/>
  </node>
  <node id="33208" label="WP_017585895_1" cy:nodeId="7675">
    <graphics x="-541.503530160023" z="0.0" y="-249.27761219817936"/>
  </node>
  <node id="32261" label="WP_016864763_5" cy:nodeId="32251">
    <graphics x="1915.8909739367157" z="0.0" y="3016.707941301039"/>
  </node>
  <node id="33334" label="WP_086689015_1" cy:nodeId="3611">
    <graphics x="-697.7771647983168" z="0.0" y="-1264.5040349777735"/>
  </node>
  <node id="33719" label="SNT25203_4" cy:nodeId="571">
    <graphics x="-1167.99669510338" z="0.0" y="-80.17628299500805"/>
  </node>
  <node id="33055" label="WP_012595952_3" cy:nodeId="29243">
    <graphics x="707.3565103744411" z="0.0" y="-1436.4603759061044"/>
  </node>
  <node id="33487" label="WP_073591536_4" cy:nodeId="1627">
    <graphics x="-909.613482639629" z="0.0" y="-1164.210386832612"/>
  </node>
  <node id="32928" label="AVH79628_6" cy:nodeId="30331">
    <graphics x="-1625.808325950954" z="0.0" y="648.7186188218386"/>
  </node>
  <node id="33692" label="WP_096536886_4" cy:nodeId="667">
    <graphics x="-635.5274222173896" z="0.0" y="-1286.424907358905"/>
  </node>
  <node id="32711" label="BAZ29305_3" cy:nodeId="31387">
    <graphics x="2405.3044290544476" z="0.0" y="1250.0461888993766"/>
  </node>
  <node id="33681" label="WP_087539234_3" cy:nodeId="699">
    <graphics x="-784.2803759506492" z="0.0" y="-1242.1638713315076"/>
  </node>
  <node id="33382" label="WP_149853923_1" cy:nodeId="2747">
    <graphics x="-874.9718067207663" z="0.0" y="157.80767742553272"/>
  </node>
  <node id="33672" label="WP_096620064_1" cy:nodeId="731">
    <graphics x="-803.3450265213901" z="0.0" y="-1223.8877299970661"/>
  </node>
  <node id="32690" label="WP_111838980_2" cy:nodeId="31451">
    <graphics x="-468.9813860065509" z="0.0" y="1613.1490966784486"/>
  </node>
  <node id="33165" label="WP_141720451_2" cy:nodeId="12027">
    <graphics x="-935.7374795337898" z="0.0" y="-80.71988576671586"/>
  </node>
  <node id="32677" label="WP_141234752_1" cy:nodeId="31483">
    <graphics x="365.3203663855457" z="0.0" y="1612.3362401909058"/>
  </node>
  <node id="33652" label="WP_027843178_2" cy:nodeId="795">
    <graphics x="-862.5777755026637" z="0.0" y="-1157.807859757875"/>
  </node>
  <node id="32665" label="WP_096559014_2" cy:nodeId="31515">
    <graphics x="-1371.5883625127237" z="0.0" y="1607.219325610497"/>
  </node>
  <node id="33642" label="WP_015659226_4" cy:nodeId="827">
    <graphics x="-901.0724735826597" z="0.0" y="-97.0062795436011"/>
  </node>
  <node id="32654" label="WP_137248807_5" cy:nodeId="31547">
    <graphics x="-1015.2961710366638" z="0.0" y="1552.8957241869227"/>
  </node>
  <node id="33620" label="WP_088242795_2" cy:nodeId="891">
    <graphics x="-694.1360826269079" z="0.0" y="-1196.9003744943946"/>
  </node>
  <node id="33234" label="BAZ42602_2" cy:nodeId="7035">
    <graphics x="-908.896435170637" z="0.0" y="-1369.978155140201"/>
  </node>
  <node id="32627" label="WP_099700413_5" cy:nodeId="31611">
    <graphics x="-995.5303034400786" z="0.0" y="1869.2110333585697"/>
  </node>
  <node id="32613" label="WP_096547181_3" cy:nodeId="31643">
    <graphics x="2209.0428019247215" z="0.0" y="1647.8444295584986"/>
  </node>
  <node id="32600" label="WP_153461219_1" cy:nodeId="31675">
    <graphics x="-1455.2675293219636" z="0.0" y="1942.6079015849828"/>
  </node>
  <node id="33448" label="WP_019499235_2" cy:nodeId="2011">
    <graphics x="-881.2099452336832" z="0.0" y="-1399.2809086172672"/>
  </node>
  <node id="33364" label="WP_114082527_3" cy:nodeId="3100">
    <graphics x="-746.4575115892508" z="0.0" y="-1136.5913397525035"/>
  </node>
  <node id="33310" label="WP_017748579_2" cy:nodeId="4124">
    <graphics x="-980.7050934248534" z="0.0" y="-1346.2326657492847"/>
  </node>
  <node id="33116" label="WP_017617392_1" cy:nodeId="23580">
    <graphics x="-730.4692194037718" z="0.0" y="-31.21726875208563"/>
  </node>
  <node id="32554" label="WP_008180360_3" cy:nodeId="31772">
    <graphics x="2517.492723581863" z="0.0" y="1932.6496095123334"/>
  </node>
  <node id="32855" label="WP_107397356_2" cy:nodeId="30780">
    <graphics x="1464.3543108827726" z="0.0" y="701.8515972830044"/>
  </node>
  <node id="33939" label="WP_096730381_2" cy:nodeId="92">
    <graphics x="-743.7117071874959" z="0.0" y="-1256.399083925138"/>
  </node>
  <node id="33437" label="WP_011321056_8" cy:nodeId="2140">
    <graphics x="-476.57677297553096" z="0.0" y="-1192.3287038872547"/>
  </node>
  <node id="32851" label="WP_162681093_3" cy:nodeId="30812">
    <graphics x="1644.5592821962491" z="0.0" y="610.6526760793911"/>
  </node>
  <node id="32521" label="WP_093601002_3" cy:nodeId="31836">
    <graphics x="408.9237955919891" z="0.0" y="2340.8152105881486"/>
  </node>
  <node id="33923" label="WP_106240815_2" cy:nodeId="124">
    <graphics x="-868.0751243551775" z="0.0" y="-1270.1122907504503"/>
  </node>
  <node id="32505" label="WP_012409787_7" cy:nodeId="31868">
    <graphics x="1534.80614651362" z="0.0" y="2155.1658340180898"/>
  </node>
  <node id="33907" label="RCJ30949_4" cy:nodeId="156">
    <graphics x="-734.1840496213113" z="0.0" y="-1324.10137002655"/>
  </node>
  <node id="33549" label="WP_133616643_3" cy:nodeId="1180">
    <graphics x="-668.7418357759825" z="0.0" y="-377.5651712669994"/>
  </node>
  <node id="33891" label="WP_044449859_1" cy:nodeId="188">
    <graphics x="-772.5762299864723" z="0.0" y="-1287.5340911859128"/>
  </node>
  <node id="33141" label="WP_020390834_2" cy:nodeId="15548">
    <graphics x="-324.7664326462193" z="0.0" y="-20.487016862875493"/>
  </node>
  <node id="33257" label="WP_099068319_3" cy:nodeId="6364">
    <graphics x="-976.2885956848902" z="0.0" y="-1187.1485932927642"/>
  </node>
  <node id="32818" label="WP_135072443_1" cy:nodeId="30940">
    <graphics x="2304.9992446191673" z="0.0" y="706.4218404639232"/>
  </node>
  <node id="32452" label="WP_047015652_1" cy:nodeId="31964">
    <graphics x="505.926694761911" z="0.0" y="2440.8152105881486"/>
  </node>
  <node id="33859" label="WP_168645325_4" cy:nodeId="252">
    <graphics x="-407.4643509872543" z="0.0" y="-1329.1595816032675"/>
  </node>
  <node id="32431" label="WP_128453384_1" cy:nodeId="31996">
    <graphics x="1636.1012171618133" z="0.0" y="2548.5373785568986"/>
  </node>
  <node id="33844" label="WP_106218514_1" cy:nodeId="284">
    <graphics x="-1085.0021680216594" z="0.0" y="-1167.835720338411"/>
  </node>
  <node id="32986" label="WP_120754718_2" cy:nodeId="29980">
    <graphics x="2102.1872884885897" z="0.0" y="-1416.525830599671"/>
  </node>
  <node id="32807" label="WP_120754718_5" cy:nodeId="31004">
    <graphics x="2054.4406446694206" z="0.0" y="641.2138422031618"/>
  </node>
  <node id="32972" label="WP_096622718_4" cy:nodeId="30012">
    <graphics x="2186.5991537229647" z="0.0" y="-1437.0234120816046"/>
  </node>
  <node id="32801" label="WP_062071413_3" cy:nodeId="31036">
    <graphics x="-1291.1099187024445" z="0.0" y="1188.2230722977433"/>
  </node>
  <node id="32388" label="WP_089126836_3" cy:nodeId="32060">
    <graphics x="-450.4929753430695" z="0.0" y="2701.263605363539"/>
  </node>
  <node id="33813" label="WP_086835908_1" cy:nodeId="348">
    <graphics x="-893.733332449773" z="0.0" y="-1303.9591942412842"/>
  </node>
  <node id="32793" label="WP_131089594_5" cy:nodeId="31068">
    <graphics x="-1285.345537293753" z="0.0" y="1125.387790925673"/>
  </node>
  <node id="32367" label="WP_096680266_3" cy:nodeId="32092">
    <graphics x="679.6815470568329" z="0.0" y="2808.985773332289"/>
  </node>
  <node id="33797" label="WP_155358788_1" cy:nodeId="380">
    <graphics x="-547.7174058343746" z="0.0" y="-62.74039812942513"/>
  </node>
  <node id="33412" label="WP_061955677_2" cy:nodeId="2428">
    <graphics x="-987.0604294439188" z="0.0" y="-371.5881026874183"/>
  </node>
  <node id="32324" label="WP_093601002_8" cy:nodeId="32156">
    <graphics x="-1377.6500455029816" z="0.0" y="2908.985773332289"/>
  </node>
  <node id="32303" label="WP_155752488_4" cy:nodeId="32188">
    <graphics x="-247.47552310307924" z="0.0" y="3016.707941301039"/>
  </node>
  <node id="32947" label="WP_026100063_8" cy:nodeId="30204">
    <graphics x="-923.5567341931671" z="0.0" y="997.2458689286027"/>
  </node>
  <node id="32260" label="WP_106218514_2" cy:nodeId="32252">
    <graphics x="1918.908426176706" z="0.0" y="2908.985773332289"/>
  </node>
  <node id="33274" label="WP_011321056_4" cy:nodeId="5660">
    <graphics x="-676.8739336157155" z="0.0" y="-1234.5527142096723"/>
  </node>
  <node id="33188" label="WP_008380405_2" cy:nodeId="9756">
    <graphics x="-862.8882328680128" z="0.0" y="-57.2536429940142"/>
  </node>
  <node id="33109" label="WP_038089561_5" cy:nodeId="27164">
    <graphics x="-1566.4335812988286" z="0.0" y="-1432.836057938828"/>
  </node>
  <node id="33493" label="WP_062339008_3" cy:nodeId="1596">
    <graphics x="-581.0898146720366" z="0.0" y="-54.31402511141508"/>
  </node>
  <node id="32738" label="WP_097216730_2" cy:nodeId="31292">
    <graphics x="540.6439074184984" z="0.0" y="1214.1700728575288"/>
  </node>
  <node id="33387" label="BAZ29283_5" cy:nodeId="2684">
    <graphics x="-681.3597696140928" z="0.0" y="-1227.059431509773"/>
  </node>
  <node id="33381" label="WP_086820178_1" cy:nodeId="2748">
    <graphics x="-992.0887429225197" z="0.0" y="335.4377763633106"/>
  </node>
  <node id="32919" label="WP_037567380_3" cy:nodeId="30396">
    <graphics x="-259.6155564143912" z="0.0" y="715.2597267321846"/>
  </node>
  <node id="33478" label="WP_011321056_2" cy:nodeId="1756">
    <graphics x="-695.8329946436857" z="0.0" y="-1211.236114160001"/>
  </node>
  <node id="33659" label="WP_019495762_1" cy:nodeId="764">
    <graphics x="-859.2644854318631" z="0.0" y="-1290.3250595723691"/>
  </node>
  <node id="33103" label="WP_026732589_1" cy:nodeId="28412">
    <graphics x="407.8770830367946" z="0.0" y="-1350.3261591206735"/>
  </node>
  <node id="33034" label="WP_167721203_5" cy:nodeId="29436">
    <graphics x="1245.7140924667253" z="0.0" y="-1297.6334749470896"/>
  </node>
  <node id="33471" label="WP_051840194_2" cy:nodeId="1820">
    <graphics x="-789.8304350222108" z="0.0" y="-352.7561669586346"/>
  </node>
  <node id="33087" label="WP_015116255_2" cy:nodeId="28444">
    <graphics x="332.430885527029" z="0.0" y="-1412.742754579658"/>
  </node>
  <node id="33018" label="WP_124970176_1" cy:nodeId="29468">
    <graphics x="1412.8499262069597" z="0.0" y="-1421.7150446187204"/>
  </node>
  <node id="33268" label="WP_169264744_1" cy:nodeId="5948">
    <graphics x="-1058.2405033900575" z="0.0" y="-1710.041643018212"/>
  </node>
  <node id="33238" label="WP_141720451_1" cy:nodeId="7004">
    <graphics x="-833.4979766593541" z="0.0" y="-144.853977426689"/>
  </node>
  <node id="32897" label="WP_091117926_2" cy:nodeId="30556">
    <graphics x="52.34447318765956" z="0.0" y="662.7849266223213"/>
  </node>
  <node id="32640" label="TWH40986_2" cy:nodeId="31580">
    <graphics x="-1765.5525326730506" z="0.0" y="1882.1218623043512"/>
  </node>
  <node id="33596" label="BBD63560_1" cy:nodeId="956">
    <graphics x="-795.9670388265799" z="0.0" y="-1182.814982160711"/>
  </node>
  <node id="33011" label="WP_167721203_1" cy:nodeId="29628">
    <graphics x="1358.670528623952" z="0.0" y="-1425.451021791572"/>
  </node>
  <node id="33444" label="WP_015113151_3" cy:nodeId="2044">
    <graphics x="-699.6101963590768" z="0.0" y="-1186.2887995103554"/>
  </node>
  <node id="32874" label="WP_015210601_5" cy:nodeId="30716">
    <graphics x="941.8743346378549" z="0.0" y="664.8801529101631"/>
  </node>
  <node id="32571" label="ROV70439_4" cy:nodeId="31740">
    <graphics x="1328.8457128348862" z="0.0" y="1912.6283082428022"/>
  </node>
  <node id="33585" label="WP_125821548_1" cy:nodeId="1053">
    <graphics x="-789.4855469303086" z="0.0" y="-142.2622918441546"/>
  </node>
  <node id="33571" label="WP_164312175_3" cy:nodeId="1085">
    <graphics x="-878.9462419994751" z="0.0" y="-28.59271219614905"/>
  </node>
  <node id="32538" label="WP_138498765_1" cy:nodeId="31805">
    <graphics x="-766.8549557813019" z="0.0" y="2161.6212484909806"/>
  </node>
  <node id="33359" label="WP_052269673_3" cy:nodeId="3197">
    <graphics x="-684.6158053067857" z="0.0" y="-48.08033064977511"/>
  </node>
  <node id="32504" label="WP_073591536_6" cy:nodeId="31869">
    <graphics x="1641.5664671770721" z="0.0" y="2176.368379838637"/>
  </node>
  <node id="33430" label="WP_087542717_4" cy:nodeId="2205">
    <graphics x="-854.130542019643" z="0.0" y="-1253.4297940735885"/>
  </node>
  <node id="33307" label="SAP16385_2" cy:nodeId="4253">
    <graphics x="-884.7831164871685" z="0.0" y="-489.8812497656097"/>
  </node>
  <node id="32488" label="WP_051700182_5" cy:nodeId="31901">
    <graphics x="-1686.835668671927" z="0.0" y="2460.83651185768"/>
  </node>
  <node id="33424" label="WP_035150190_1" cy:nodeId="2237">
    <graphics x="-778.150670366274" z="0.0" y="-1126.0305862528219"/>
  </node>
  <node id="33140" label="WP_020390834_1" cy:nodeId="15549">
    <graphics x="-438.8040205824302" z="0.0" y="-266.67856043254744"/>
  </node>
  <node id="32472" label="WP_051700182_3" cy:nodeId="31933">
    <graphics x="-521.788808930716" z="0.0" y="2440.8152105881486"/>
  </node>
  <node id="33875" label="WP_096730381_1" cy:nodeId="221">
    <graphics x="-739.3320436314384" z="0.0" y="-1168.2084135369694"/>
  </node>
  <node id="33421" label="WP_155746097_2" cy:nodeId="2269">
    <graphics x="-799.270577249204" z="0.0" y="-1143.0446821891999"/>
  </node>
  <node id="33353" label="BAZ30575_1" cy:nodeId="3325">
    <graphics x="-730.2694295851684" z="0.0" y="-1139.597721822054"/>
  </node>
  <node id="33255" label="WP_096679519_2" cy:nodeId="6397">
    <graphics x="-961.2153116102843" z="0.0" y="-1388.7590675453137"/>
  </node>
  <node id="32988" label="WP_011321056_7" cy:nodeId="29949">
    <graphics x="1706.7433664535422" z="0.0" y="-1353.1383844624704"/>
  </node>
  <node id="32430" label="WP_107961734_1" cy:nodeId="31997">
    <graphics x="1639.1186694018036" z="0.0" y="2440.8152105881486"/>
  </node>
  <node id="32985" label="WP_107115831_3" cy:nodeId="29981">
    <graphics x="2068.1228353635897" z="0.0" y="-1449.1789449185187"/>
  </node>
  <node id="32806" label="WP_141310912_3" cy:nodeId="31005">
    <graphics x="2066.106835770495" z="0.0" y="769.768056680701"/>
  </node>
  <node id="32409" label="WP_093619522_6" cy:nodeId="32029">
    <graphics x="-1483.684949982962" z="0.0" y="2808.985773332289"/>
  </node>
  <node id="33828" label="WP_124970176_14" cy:nodeId="317">
    <graphics x="-931.667152627632" z="0.0" y="-1209.0554040380118"/>
  </node>
  <node id="32366" label="WP_010996620_2" cy:nodeId="32093">
    <graphics x="682.6989992968231" z="0.0" y="2701.263605363539"/>
  </node>
  <node id="32786" label="WP_145982885_1" cy:nodeId="31101">
    <graphics x="-808.1740671732892" z="0.0" y="1277.8030575609462"/>
  </node>
  <node id="32345" label="WP_110163988_3" cy:nodeId="32125">
    <graphics x="1812.8735216967254" z="0.0" y="2808.985773332289"/>
  </node>
  <node id="33404" label="WP_069073064_8" cy:nodeId="2493">
    <graphics x="-537.6549069325258" z="0.0" y="-1227.125293872279"/>
  </node>
  <node id="32966" label="WP_058047489_2" cy:nodeId="30141">
    <graphics x="2181.6589758054843" z="0.0" y="-1401.6007054776007"/>
  </node>
  <node id="32302" label="WP_017743137_5" cy:nodeId="32189">
    <graphics x="-244.458070863089" z="0.0" y="2908.985773332289"/>
  </node>
  <node id="33757" label="WP_109595189_2" cy:nodeId="477">
    <graphics x="-1031.4440654284779" z="0.0" y="-219.81522422322337"/>
  </node>
  <node id="33514" label="CEJ45116_6" cy:nodeId="1501">
    <graphics x="-368.4784545900469" z="0.0" y="-1199.9168164563778"/>
  </node>
  <node id="32767" label="WP_092602219_1" cy:nodeId="31197">
    <graphics x="-473.15376864751283" z="0.0" y="1125.387790925673"/>
  </node>
  <node id="32281" label="WP_015116255_1" cy:nodeId="32221">
    <graphics x="885.7164515368133" z="0.0" y="3016.707941301039"/>
  </node>
  <node id="33741" label="WP_019505167_2" cy:nodeId="509">
    <graphics x="-1054.3522617955748" z="0.0" y="-1018.6848031893784"/>
  </node>
  <node id="33727" label="ALC22075_1" cy:nodeId="541">
    <graphics x="-1048.5671704081278" z="0.0" y="-116.91660202519304"/>
  </node>
  <node id="32747" label="WP_015078657_3" cy:nodeId="31261">
    <graphics x="714.1741377385858" z="0.0" y="1162.627341815331"/>
  </node>
  <node id="33718" label="WP_016570561_2" cy:nodeId="573">
    <graphics x="-997.885036037617" z="0.0" y="-156.6968384410491"/>
  </node>
  <node id="33180" label="WP_148763415_2" cy:nodeId="10813">
    <graphics x="-700.6841918624991" z="0.0" y="-1293.6987176173313"/>
  </node>
  <node id="33054" label="WP_096589596_5" cy:nodeId="29245">
    <graphics x="790.5230829452419" z="0.0" y="-1399.8475981961435"/>
  </node>
  <node id="33709" label="WP_103136595_2" cy:nodeId="605">
    <graphics x="-786.9903376481666" z="0.0" y="-1161.758959030925"/>
  </node>
  <node id="33393" label="WP_015207767_3" cy:nodeId="2653">
    <graphics x="-893.2795224160935" z="0.0" y="-934.3151798093049"/>
  </node>
  <node id="33699" label="WP_015212417_3" cy:nodeId="637">
    <graphics x="-739.8615618294275" z="0.0" y="-1249.0116543415531"/>
  </node>
  <node id="32720" label="WP_096664869_6" cy:nodeId="31357">
    <graphics x="2041.3433791042567" z="0.0" y="1156.478030095126"/>
  </node>
  <node id="33482" label="WP_026100063_4" cy:nodeId="1693">
    <graphics x="-760.4226904610109" z="0.0" y="-1207.2239067145454"/>
  </node>
  <node id="32710" label="WP_089092704_3" cy:nodeId="31389">
    <graphics x="2315.785614967533" z="0.0" y="1150.1120343888786"/>
  </node>
  <node id="33322" label="WP_086760950_3" cy:nodeId="3773">
    <graphics x="-933.8497026156099" z="0.0" y="-1356.2943269815476"/>
  </node>
  <node id="32701" label="WP_112963677_2" cy:nodeId="31421">
    <graphics x="778.6161596680532" z="0.0" y="1520.618651822469"/>
  </node>
  <node id="32689" label="WP_112963677_3" cy:nodeId="31453">
    <graphics x="-518.7848070270585" z="0.0" y="1673.3272687899598"/>
  </node>
  <node id="33658" label="WP_099068319_4" cy:nodeId="765">
    <graphics x="-897.3093765988295" z="0.0" y="-1211.6010280593362"/>
  </node>
  <node id="33470" label="WP_018960901_1" cy:nodeId="1821">
    <graphics x="-739.8714519259167" z="0.0" y="-308.0928160825048"/>
  </node>
  <node id="33106" label="WP_015194417_3" cy:nodeId="27421">
    <graphics x="-926.8456592862774" z="0.0" y="-1036.4907075794943"/>
  </node>
  <node id="32664" label="WP_096536886_7" cy:nodeId="31517">
    <graphics x="-1309.9449346639078" z="0.0" y="1559.3511386598134"/>
  </node>
  <node id="33619" label="WP_011610106_1" cy:nodeId="893">
    <graphics x="-920.2761983730295" z="0.0" y="-1197.6910567688935"/>
  </node>
  <node id="33158" label="WP_094742457_2" cy:nodeId="13181">
    <graphics x="-732.6174734498138" z="0.0" y="-419.4074264245345"/>
  </node>
  <node id="32612" label="WP_162681093_2" cy:nodeId="31645">
    <graphics x="2158.3836680135887" z="0.0" y="1570.4913411795924"/>
  </node>
  <node id="33229" label="WP_019499235_5" cy:nodeId="7101">
    <graphics x="-1106.3692633685134" z="0.0" y="-1106.6542795340827"/>
  </node>
  <node id="33130" label="WP_162944541_1" cy:nodeId="18397">
    <graphics x="-1332.532445752557" z="0.0" y="-1169.573940724036"/>
  </node>
  <node id="33071" label="TAE58797_1" cy:nodeId="28637">
    <graphics x="491.5753786300563" z="0.0" y="-1407.067217470283"/>
  </node>
  <node id="32570" label="WP_060892878_5" cy:nodeId="31741">
    <graphics x="1345.487787419847" z="0.0" y="2019.1153687896772"/>
  </node>
  <node id="32865" label="RCJ30949_11" cy:nodeId="30750">
    <graphics x="1056.7005866214975" z="0.0" y="701.8929452590248"/>
  </node>
  <node id="32537" label="OUC15299_1" cy:nodeId="31806">
    <graphics x="-660.0946351178497" z="0.0" y="2176.368379838637"/>
  </node>
  <node id="33938" label="WP_073639381_1" cy:nodeId="94">
    <graphics x="-715.9868091519743" z="0.0" y="-1145.3555145356984"/>
  </node>
  <node id="33069" label="BAZ29305_1" cy:nodeId="28766">
    <graphics x="368.23635122527116" z="0.0" y="-1313.224444032783"/>
  </node>
  <node id="32520" label="BAU44627_5" cy:nodeId="31838">
    <graphics x="315.2613614052666" z="0.0" y="1903.4046695753505"/>
  </node>
  <node id="33922" label="WP_096575011_6" cy:nodeId="126">
    <graphics x="-784.980444589542" z="0.0" y="-1280.8023931434325"/>
  </node>
  <node id="33558" label="RCJ40334_5" cy:nodeId="1150">
    <graphics x="-760.7267658355117" z="0.0" y="-1404.1014069940027"/>
  </node>
  <node id="33906" label="WP_087539234_1" cy:nodeId="158">
    <graphics x="-800.7249747123274" z="0.0" y="-1222.4050231545295"/>
  </node>
  <node id="33306" label="WP_164390060_1" cy:nodeId="4254">
    <graphics x="-876.0372245749685" z="0.0" y="-163.09739924964995"/>
  </node>
  <node id="32997" label="WP_138499068_3" cy:nodeId="29854">
    <graphics x="1523.9135400985613" z="0.0" y="-1430.2852960835642"/>
  </node>
  <node id="33890" label="WP_096569967_4" cy:nodeId="190">
    <graphics x="-670.4652411617858" z="0.0" y="-1299.8442563857714"/>
  </node>
  <node id="32471" label="WP_052680420_5" cy:nodeId="31934">
    <graphics x="-505.146734345755" z="0.0" y="2547.3022711350236"/>
  </node>
  <node id="32817" label="WP_055421432_2" cy:nodeId="30942">
    <graphics x="2335.586399007595" z="0.0" y="763.4464986670489"/>
  </node>
  <node id="32451" label="WP_118166682_5" cy:nodeId="31966">
    <graphics x="605.926694761911" z="0.0" y="2548.5373785568986"/>
  </node>
  <node id="33843" label="AVH79535_6" cy:nodeId="286">
    <graphics x="-900.511669432365" z="0.0" y="-1155.8339713270723"/>
  </node>
  <node id="33280" label="TCN71580_1" cy:nodeId="5406">
    <graphics x="-716.9142302566552" z="0.0" y="74.28119083216862"/>
  </node>
  <node id="33217" label="WP_053560627_3" cy:nodeId="7454">
    <graphics x="-874.2319293412955" z="0.0" y="-215.43249388490835"/>
  </node>
  <node id="32408" label="WP_109595189_6" cy:nodeId="32030">
    <graphics x="-1480.6674977429718" z="0.0" y="2701.263605363539"/>
  </node>
  <node id="33173" label="WP_168643398_6" cy:nodeId="11582">
    <graphics x="-1148.9505746708894" z="0.0" y="-1320.220755683218"/>
  </node>
  <node id="32800" label="AFR27446_3" cy:nodeId="31038">
    <graphics x="-1222.4117909558624" z="0.0" y="1193.8633005692277"/>
  </node>
  <node id="32387" label="WP_017311237_3" cy:nodeId="32062">
    <graphics x="-350.4929753430695" z="0.0" y="2808.985773332289"/>
  </node>
  <node id="33343" label="WP_061955677_4" cy:nodeId="3422">
    <graphics x="-1122.0919258659358" z="0.0" y="-449.1890194594514"/>
  </node>
  <node id="33411" label="WP_131089594_2" cy:nodeId="2430">
    <graphics x="-962.1380434198879" z="0.0" y="-340.5167143743372"/>
  </node>
  <node id="32344" label="WP_102116354_3" cy:nodeId="32126">
    <graphics x="1815.8909739367157" z="0.0" y="2701.263605363539"/>
  </node>
  <node id="33523" label="WP_012409362_6" cy:nodeId="1438">
    <graphics x="-607.4122918371861" z="0.0" y="-1191.573956105294"/>
  </node>
  <node id="33126" label="WP_035150190_5" cy:nodeId="18846">
    <graphics x="-1165.3307884944663" z="0.0" y="-1045.0181502574303"/>
  </node>
  <node id="32323" label="WP_096681247_7" cy:nodeId="32158">
    <graphics x="-1277.6500455029816" z="0.0" y="3016.707941301039"/>
  </node>
  <node id="33773" label="WP_079191916_3" cy:nodeId="446">
    <graphics x="-1037.2347923627465" z="0.0" y="-71.15946581637266"/>
  </node>
  <node id="33212" label="WP_051817283_2" cy:nodeId="7614">
    <graphics x="-592.1747665076629" z="0.0" y="-253.59105792109645"/>
  </node>
  <node id="32280" label="WP_096659345_2" cy:nodeId="32222">
    <graphics x="888.7339037768036" z="0.0" y="2908.985773332289"/>
  </node>
  <node id="32259" label="WP_089126833_2" cy:nodeId="32254">
    <graphics x="2018.908426176706" z="0.0" y="3016.707941301039"/>
  </node>
  <node id="32936" label="WP_012409787_6" cy:nodeId="30238">
    <graphics x="-1744.4749214099384" z="0.0" y="572.3404144761355"/>
  </node>
  <node id="33680" label="WP_006195640_5" cy:nodeId="702">
    <graphics x="-774.7219276313258" z="0.0" y="-1267.3772176894306"/>
  </node>
  <node id="33380" label="WP_143043955_3" cy:nodeId="2750">
    <graphics x="-851.8272794713492" z="0.0" y="-253.29239980676235"/>
  </node>
  <node id="33241" label="WP_015659226_2" cy:nodeId="6846">
    <graphics x="-813.045862039341" z="0.0" y="-98.10466485293594"/>
  </node>
  <node id="32918" label="WP_030061393_1" cy:nodeId="30398">
    <graphics x="-302.77101295735997" z="0.0" y="640.7205345324776"/>
  </node>
  <node id="32700" label="WP_042619690_5" cy:nodeId="31422">
    <graphics x="849.6247045899282" z="0.0" y="1564.3744701894734"/>
  </node>
  <node id="32688" label="WP_062451377_2" cy:nodeId="31454">
    <graphics x="-509.4166582233478" z="0.0" y="1546.440309714032"/>
  </node>
  <node id="33102" label="WP_096561092_1" cy:nodeId="28414">
    <graphics x="480.0092317794704" z="0.0" y="-1345.1019464741892"/>
  </node>
  <node id="33033" label="WP_087592205_2" cy:nodeId="29438">
    <graphics x="1364.271511289967" z="0.0" y="-1336.5355402241892"/>
  </node>
  <node id="33086" label="WP_089092704_1" cy:nodeId="28446">
    <graphics x="445.6375276779079" z="0.0" y="-1472.6904474507517"/>
  </node>
  <node id="33017" label="WP_087592205_4" cy:nodeId="29470">
    <graphics x="1378.7571375106706" z="0.0" y="-1399.7506281148142"/>
  </node>
  <node id="33641" label="WP_078760724_1" cy:nodeId="830">
    <graphics x="-966.9772303518482" z="0.0" y="-10.00079477174458"/>
  </node>
  <node id="33267" label="WP_169264746_1" cy:nodeId="5950">
    <graphics x="-1141.3363853526246" z="0.0" y="-1701.8597386052895"/>
  </node>
  <node id="32653" label="WP_161483240_5" cy:nodeId="31550">
    <graphics x="-1094.0142534646425" z="0.0" y="1653.952700505282"/>
  </node>
  <node id="33632" label="WP_053455886_3" cy:nodeId="862">
    <graphics x="-859.8027072822723" z="0.0" y="-1118.4124885233648"/>
  </node>
  <node id="32639" label="WP_073619367_2" cy:nodeId="31582">
    <graphics x="-1792.2340664865271" z="0.0" y="2010.1849421383356"/>
  </node>
  <node id="33606" label="WP_073643028_3" cy:nodeId="926">
    <graphics x="-897.5380600489724" z="0.0" y="-1236.2338025270326"/>
  </node>
  <node id="33368" label="WP_163699711_2" cy:nodeId="3006">
    <graphics x="-1207.713033616805" z="0.0" y="-1061.6453546934824"/>
  </node>
  <node id="32599" label="WP_054237388_1" cy:nodeId="31678">
    <graphics x="-1580.908474756534" z="0.0" y="1961.200850498557"/>
  </node>
  <node id="33367" label="WP_096728455_1" cy:nodeId="3038">
    <graphics x="-885.4953116536188" z="0.0" y="-997.1762852168353"/>
  </node>
  <node id="32586" label="WP_146082522_1" cy:nodeId="31710">
    <graphics x="-937.9400548045076" z="0.0" y="2441.972295019844"/>
  </node>
  <node id="33592" label="WP_044449859_3" cy:nodeId="1022">
    <graphics x="-687.906270558276" z="0.0" y="-1349.4175575789593"/>
  </node>
  <node id="33366" label="WP_096689510_1" cy:nodeId="3070">
    <graphics x="-841.8751055990859" z="0.0" y="-1077.6434557324571"/>
  </node>
  <node id="33314" label="WP_019499235_3" cy:nodeId="4094">
    <graphics x="-991.1007468930027" z="0.0" y="-1190.6564608560473"/>
  </node>
  <node id="32873" label="WP_168357543_6" cy:nodeId="30718">
    <graphics x="826.6840804264291" z="0.0" y="813.9073326281807"/>
  </node>
  <node id="33584" label="WP_051840628_1" cy:nodeId="1055">
    <graphics x="-756.3912943384723" z="0.0" y="-129.17316314959933"/>
  </node>
  <node id="32553" label="WP_015126776_3" cy:nodeId="31775">
    <graphics x="-1792.7373067029328" z="0.0" y="2161.6212484909806"/>
  </node>
  <node id="33570" label="AGP61345_4" cy:nodeId="1087">
    <graphics x="-749.0322501076382" z="0.0" y="-243.93001589496876"/>
  </node>
  <node id="32854" label="WP_037567380_2" cy:nodeId="30783">
    <graphics x="1552.3529242403165" z="0.0" y="725.8352741934048"/>
  </node>
  <node id="32519" label="RMF68567_2" cy:nodeId="31839">
    <graphics x="422.02168206871875" z="0.0" y="1918.1518009230067"/>
  </node>
  <node id="33358" label="WP_169242999_3" cy:nodeId="3199">
    <graphics x="-1285.355525473977" z="0.0" y="-1036.928360983107"/>
  </node>
  <node id="33200" label="AVH79662_3" cy:nodeId="8319">
    <graphics x="-896.5903270192492" z="0.0" y="-1411.8950278061272"/>
  </node>
  <node id="32503" label="WP_168643398_5" cy:nodeId="31871">
    <graphics x="1575.399787794748" z="0.0" y="2261.475313432387"/>
  </node>
  <node id="33548" label="AGP61345_5" cy:nodeId="1183">
    <graphics x="-807.7721830671298" z="0.0" y="-240.2076725460708"/>
  </node>
  <node id="33429" label="WP_068385845_5" cy:nodeId="2207">
    <graphics x="-818.0973707794033" z="0.0" y="-1095.9847521134832"/>
  </node>
  <node id="33176" label="WP_062295185_2" cy:nodeId="11423">
    <graphics x="-1532.2186872551395" z="0.0" y="-1707.4247516991052"/>
  </node>
  <node id="32838" label="WP_133890759_5" cy:nodeId="30879">
    <graphics x="-1597.0105906515491" z="0.0" y="1041.4667218396353"/>
  </node>
  <node id="33423" label="WP_096689510_4" cy:nodeId="2239">
    <graphics x="-982.2114599524346" z="0.0" y="-1383.6667254501551"/>
  </node>
  <node id="33874" label="WP_096569967_6" cy:nodeId="223">
    <graphics x="-489.5631099675368" z="0.0" y="-1293.4060601318668"/>
  </node>
  <node id="32450" label="AFY52807_5" cy:nodeId="31967">
    <graphics x="608.9441470019012" z="0.0" y="2440.8152105881486"/>
  </node>
  <node id="33858" label="WP_013190203_4" cy:nodeId="255">
    <graphics x="-372.168870373774" z="0.0" y="-1230.2260339328384"/>
  </node>
  <node id="32429" label="WP_015207763_2" cy:nodeId="31999">
    <graphics x="1739.1186694018036" z="0.0" y="2548.5373785568986"/>
  </node>
  <node id="33279" label="WP_129307298_2" cy:nodeId="5407">
    <graphics x="-695.7928422210616" z="0.0" y="-16.066829513677106"/>
  </node>
  <node id="32984" label="WP_044377254_1" cy:nodeId="29983">
    <graphics x="2165.2263204710116" z="0.0" y="-1469.172429415589"/>
  </node>
  <node id="33827" label="WP_017748579_3" cy:nodeId="319">
    <graphics x="-896.0336810113794" z="0.0" y="-1180.0070631781307"/>
  </node>
  <node id="33348" label="WP_096536886_3" cy:nodeId="3391">
    <graphics x="-691.1976014559909" z="0.0" y="-1290.3211956647172"/>
  </node>
  <node id="32386" label="WP_016863105_2" cy:nodeId="32063">
    <graphics x="-347.47552310307924" z="0.0" y="2701.263605363539"/>
  </node>
  <node id="33812" label="WP_017314970_2" cy:nodeId="351">
    <graphics x="-817.2766695386667" z="0.0" y="-1207.9485384993202"/>
  </node>
  <node id="32365" label="WP_124200676_2" cy:nodeId="32095">
    <graphics x="782.6989992968231" z="0.0" y="2808.985773332289"/>
  </node>
  <node id="32785" label="WP_161483240_1" cy:nodeId="31103">
    <graphics x="-779.7434031107892" z="0.0" y="1139.8108853197352"/>
  </node>
  <node id="33789" label="WP_027843178_3" cy:nodeId="415">
    <graphics x="-835.4759532746092" z="0.0" y="-1196.0510147480124"/>
  </node>
  <node id="32782" label="WP_148763415_6" cy:nodeId="31135">
    <graphics x="-979.2303004335331" z="0.0" y="1212.1465202620795"/>
  </node>
  <node id="32322" label="WP_070396421_1" cy:nodeId="32159">
    <graphics x="-1274.6325932629913" z="0.0" y="2908.985773332289"/>
  </node>
  <node id="33772" label="WP_052680420_4" cy:nodeId="447">
    <graphics x="-1164.6741910067155" z="0.0" y="-46.648286764195774"/>
  </node>
  <node id="33171" label="WP_096590413_2" cy:nodeId="11711">
    <graphics x="-835.8215985234991" z="0.0" y="-1023.2860807687572"/>
  </node>
  <node id="32301" label="WP_095739934_1" cy:nodeId="32191">
    <graphics x="-144.458070863089" z="0.0" y="3016.707941301039"/>
  </node>
  <node id="33756" label="WP_093619522_5" cy:nodeId="479">
    <graphics x="-1048.0278662450953" z="0.0" y="-38.93117831121211"/>
  </node>
  <node id="32957" label="WP_016950446_5" cy:nodeId="30175">
    <graphics x="-574.9671803601593" z="0.0" y="808.9537394120011"/>
  </node>
  <node id="33740" label="WP_086769105_5" cy:nodeId="511">
    <graphics x="-982.4898006608407" z="0.0" y="-1414.5497869071148"/>
  </node>
  <node id="32258" label="WP_089126836_2" cy:nodeId="32255">
    <graphics x="2021.9258784166962" z="0.0" y="2908.985773332289"/>
  </node>
  <node id="33726" label="WP_130878496_5" cy:nodeId="543">
    <graphics x="-1044.2222393648342" z="0.0" y="-119.5977798545853"/>
  </node>
  <node id="33273" label="CEJ45116_3" cy:nodeId="5663">
    <graphics x="-755.8390248774954" z="0.0" y="-1337.5997143908933"/>
  </node>
  <node id="33492" label="WP_066371470_3" cy:nodeId="1599">
    <graphics x="-507.8480486266426" z="0.0" y="-136.47183078676497"/>
  </node>
  <node id="33053" label="WP_015216084_3" cy:nodeId="29247">
    <graphics x="700.7548486923122" z="0.0" y="-1364.2805892239755"/>
  </node>
  <node id="33708" label="TVP62740_2" cy:nodeId="607">
    <graphics x="-703.4554603200809" z="0.0" y="-1169.5312158079648"/>
  </node>
  <node id="33698" label="WP_066383651_3" cy:nodeId="639">
    <graphics x="-678.723694541753" z="0.0" y="-1206.6743759460112"/>
  </node>
  <node id="33121" label="WP_006195640_10" cy:nodeId="23167">
    <graphics x="-479.08561798583764" z="0.0" y="-1083.9130162045656"/>
  </node>
  <node id="33042" label="WP_087592205_3" cy:nodeId="29311">
    <graphics x="776.1865808700466" z="0.0" y="-1481.0005060445017"/>
  </node>
  <node id="33691" label="RCJ30949_6" cy:nodeId="671">
    <graphics x="-665.1016052689806" z="0.0" y="-1191.6657408859062"/>
  </node>
  <node id="33385" label="WP_137451632_4" cy:nodeId="2719">
    <graphics x="-1131.0976914794535" z="0.0" y="93.00283236751548"/>
  </node>
  <node id="33671" label="WP_087539234_2" cy:nodeId="735">
    <graphics x="-771.4162844038506" z="0.0" y="-1238.9822836361307"/>
  </node>
  <node id="32911" label="WP_104263878_2" cy:nodeId="30431">
    <graphics x="-214.93904274251622" z="0.0" y="619.4674369982979"/>
  </node>
  <node id="33657" label="WP_027845719_1" cy:nodeId="767">
    <graphics x="-824.4654557696481" z="0.0" y="-1146.5093446695425"/>
  </node>
  <node id="33475" label="WP_096681247_6" cy:nodeId="1791">
    <graphics x="-714.1669219034079" z="0.0" y="-1140.883559769736"/>
  </node>
  <node id="32663" label="RCJ14929_7" cy:nodeId="31519">
    <graphics x="-1266.31010323538" z="0.0" y="1679.1362205232167"/>
  </node>
  <node id="33240" label="WP_015198131_3" cy:nodeId="6975">
    <graphics x="-1005.810289068583" z="0.0" y="-1063.9243910860566"/>
  </node>
  <node id="32626" label="WP_086835908_9005" cy:nodeId="31615">
    <graphics x="-41.920511922302175" z="0.0" y="1995.3260859371635"/>
  </node>
  <node id="33455" label="RCJ40334_3" cy:nodeId="1951">
    <graphics x="-948.8438187424024" z="0.0" y="-1211.2949420191178"/>
  </node>
  <node id="32611" label="WP_141366901_1" cy:nodeId="31647">
    <graphics x="2131.7021342001126" z="0.0" y="1698.5544210135768"/>
  </node>
  <node id="33447" label="WP_019501955_6" cy:nodeId="2015">
    <graphics x="-1062.5275119869327" z="0.0" y="-1309.0298233336832"/>
  </node>
  <node id="33129" label="WP_015155263_2" cy:nodeId="18399">
    <graphics x="-1366.2100238649002" z="0.0" y="-1271.609064737702"/>
  </node>
  <node id="32877" label="CNF13542_1" cy:nodeId="30687">
    <graphics x="448.3879912540658" z="0.0" y="700.3445427111885"/>
  </node>
  <node id="32585" label="WP_094261964_1" cy:nodeId="31711">
    <graphics x="-831.1797341410554" z="0.0" y="2456.7194263675005"/>
  </node>
  <node id="33070" label="BAZ41701_1" cy:nodeId="28671">
    <graphics x="462.0056764816188" z="0.0" y="-1313.024248720283"/>
  </node>
  <node id="32569" label="WP_164496180_2" cy:nodeId="31743">
    <graphics x="1429.404146367601" z="0.0" y="1951.439770645146"/>
  </node>
</graph>
