# Supplementary material for: Understanding thioamitide biosynthesis using pathway engineering and untargeted metabolomics
Source: Chem Sci. 2021 Apr 19;12(20):7138–50. doi: 10.1039/d0sc06835g (PMC8153245; doi:10.1039/d0sc06835g)
Supplement: SC-012-D0SC06835G-s002 [file SC-012-D0SC06835G-s002.xlsx]

## Sheet: Sheet 1
Supplementary Dataset 2 - RiPPER output
RiPPER output for short peptides encoded near HopA1 proteins. Only peptides in networks are listed below
Note that original 1340 accessions were filtered using a 95% identity cut-off to reduce redundancy
HopA1 ACCESSION	Organism	Genus	Network	Peptide name	PPSerial	Peptide sequence	PP distance to HopA1	Same Strand as HopA1?	Prodigal score	Pfam hits	Pfam description	Pfam hit significance
AFR27446	Arthrobacter sp. Rue61a	Arthrobacter	1	AFR27446_1	1	MSNAVVNFRQADLTDLARAHSTFAAADELGGDAATDAPATSPLCIGIIVGATLGAGC	112	yes	29.96	none	none	none
AFR27446	Arthrobacter sp. Rue61a	Arthrobacter	1	AFR27446_2	2	MTHAITNIPQADLADLARAHSTFTAADELGGDAATDAPATTPFCAGVIIGATLTMGC	402	yes	26.96	none	none	none
AFY52807	Rivularia sp. PCC 7116	Rivularia	1	AFY52807_3	3	MAKLQINDVKLDGAELFNDSETFLNELQDGEIEQVVGGLTRVAPEHVTTTAYFPDKPYRTVYIPKEPIHPRLPVHPKEPVHPRQPIKFPYFPHPQTPVIL	2393	yes	35.91	PF04604.13	Type-A lantibiotic	3.8e-06
AFY52807	Rivularia sp. PCC 7116	Rivularia	1	AFY52807_4	4	MAKIQINDVKLGDTELLNDAETFLNELENGEMEQVIGGKTISLDDYEFYKNKKFDFPKRLHPIKPIDFPEPNLPKLPKHPGVIKIPYEPVIL	1441	yes	34.24	PF04604.13	Type-A lantibiotic	5.7e-07
AFY52807	Rivularia sp. PCC 7116	Rivularia	1	AFY52807_1	1	MAKIQIKDVNLDGAELFNDSETFLNELQDGEIEQVVGGKTLVAKDRLAVYTVHYPDEPIHPGRPPVHPGRPVHPIKPVHPRKPIKFPHFPHPYTPVIL	1968	yes	40.21	PF04604.13	Type-A lantibiotic	4.9e-06
AFY52807	Rivularia sp. PCC 7116	Rivularia	1	AFY52807_2	2	MSKFQINDIKLDGSELFNDSETFLSELKDDETDQIVGGFSLSLSEESSSEASINIKLEVSGDADVTTTVYIPHKPICYPIKPIKPICWYPKPICDQKPFYPIKDFYYPCPVIL	464	yes	38.46	PF07550.11	Protein of unknown function (DUF1533)	1.8e-06
AGP61345	Streptomyces rapamycinicus NRRL 5491	Streptomyces	1	AGP61345_5	5	MTHTADLMAGYTAYTSAAELGAAVDEAPAYTPTLSITGTCMTPILTLVNGC	2524	yes	25.69	none	none	none
AGP61345	Streptomyces rapamycinicus NRRL 5491	Streptomyces	1	AGP61345_4	4	MNTETLFEGYSTYTDADKLAASSQADEAPATITLSVATVILTIQQGC	5322	yes	35.36	none	none	none
ALC22075	Streptomyces pristinaespiralis	Streptomyces	1	ALC22075_1	1	MDKTGAITELIEGYDSYSDAEELNSTAAAEAPATSAPCGAASVSWLASQFTVKTYKEGC	430	yes	52.23	none	none	none
ALC22075	Streptomyces pristinaespiralis	Streptomyces	1	ALC22075_2	2	MSGPADAGPRIQENTMQNNTEIMDLIANYDAYADVDELNVTAAADAPATTPVCAASVASSTWCASAASAISGATYEAGC	117	yes	50.05	none	none	none
ALC22075	Streptomyces pristinaespiralis	Streptomyces	1	ALC22075_5	5	MADLQQTGSISELVAGYDTYSEAGELVAEAAADAPASTPTCAAATISWLGSQLTVKTYKEGC	612	yes	33.08	PF06259.12	Alpha/beta hydrolase	1.6e-06
ANI93503	Dietzia timorensis	Dietzia	1	ANI93503_3	3	MHNDILDGFNTYATPAELADTNAADTPATTVPCSALASYGTAKLGC	902	yes	28.16	none	none	none
ANI93503	Dietzia timorensis	Dietzia	1	ANI93503_1	1	MHNDILDGFNTYATPAELADTNAADTPATTVPCSALASYGTAKLGC	490	yes	28.16	none	none	none
ANI93503	Dietzia timorensis	Dietzia	1	ANI93503_6	6	MHNDILDGFNTYATPAELADTNAADTPATTVPCSALASITTAELGC	1108	yes	23.01	none	none	none
ANI93503	Dietzia timorensis	Dietzia	1	ANI93503_5	5	MHNDILDGFNTYATPAELADTNAADTPATTVPCSALASITTAELGC	284	yes	24.81	none	none	none
ANI93503	Dietzia timorensis	Dietzia	1	ANI93503_2	2	MHNDILDGFNTYATPAELADTNAADTPATTVPCSALASYGTAKLGC	696	yes	28.16	none	none	none
ANS68054	Streptomyces lincolnensis	Streptomyces	1	ANS68054_1	1	MEKATSIVELLSGYEAYSSAEEINLSAATDAPATTWGCAAVSASVSWMSGQVVSKTVDDGC	452	yes	52.1	PF01592.16	NifU-like N terminal domain	4.9e-06
ANS68054	Streptomyces lincolnensis	Streptomyces	1	ANS68054_2	2	MNSNDSIMELVAGYETYMDADELDVTAVADAPATTWYCASAAASFISAATYEATC	157	yes	33.98	none	none	none
AOX46105	Microbacterium sp. BH-3-3-3	Microbacterium	1	AOX46105_3	3	MNHKIIEGYARYVSADEVMTSTASAPEVSPTPATPISTLSFASFVGGVTTYNFGC	3951	yes	25.2	PF05283.11	Multi-glycosylated core protein 24 (MGC-24), sialomucin	7.2e-06
AOX46105	Microbacterium sp. BH-3-3-3	Microbacterium	1	AOX46105_2	2	MTMLNERLIAGYSTFTAADELMNSTATAPAVSPTVSIVGSAVTIGATSFASGFTVAWTVDTGC	3741	yes	43.47	none	none	none
AVH79456	Roholtiella [Tolypothrix] sp. PCC 7415	Roholtiella	1	AVH79456_3	3	MASITVSNLRPIGSDLFMDSESFMDALTDNELAEINGGASPVLITTIATKWFVGAAVAGGIVGAIIYW	1887	yes	35.05	PF10439.9	Bacteriocin class II with double-glycine leader peptide	5.5e-09
AVH79456	Roholtiella [Tolypothrix] sp. PCC 7415	Roholtiella	1	AVH79456_7	7	MSRLNVSDLNPAGYEFFQDSESFLIDLQEDELYIHRGGIFITTNISVINVPISEDIFAPSISFIR	2243	no	8.49	none	none	none
AVH79456	Roholtiella [Tolypothrix] sp. PCC 7415	Roholtiella	1	AVH79456_4	4	MSTINIQDIKVAGSDLFSDDETYLNELSHDELGAAKGGITPTVAGTLALSSAFVLSYNLSKIGTELKNKFF	1601	yes	29.59	none	none	none
AVH79535	Synechocystis sp. PCC 9413	Synechocystis	1	AVH79535_6	6	MMPTISITDLKPKGSDLFQDSETYLRDISADEEIGISGGTLTSTVPCGVAISISVITYIVTRKIQEEGEKEIE	10	yes	23.24	none	none	none
AVH79535	Synechocystis sp. PCC 9413	Synechocystis	1	AVH79535_2	2	MATIAIRDLNPTGYSLFDGSESYLAELSSDDELDIYGGKLSSALGFSVGTVIGVTIVASLVYLLS	693	yes	30.68	PF06105.12	Aph-1 protein	1.5e-06
AVH79535	Synechocystis sp. PCC 9413	Synechocystis	1	AVH79535_8	8	MSKINISNLDTSGYSLLLDTESYLWEIDSLSALDTGVIGGTGHLTASPIAVTPKLTPLFWIC	1293	yes	16.11	none	none	none
AVH79535	Synechocystis sp. PCC 9413	Synechocystis	1	AVH79535_1	1	MSTIKIADLHFSGSDLLQDNESYLNELDNLSLDASQIQGGLTPVPVVSIVTATVITAISVVTRIAKEINEIVNPCPPPPCEF	1538	yes	31.8	none	none	none
AVH79535	Synechocystis sp. PCC 9413	Synechocystis	1	AVH79535_7	7	MAIILIRDLNPVGYSLFSDRESYLRDLSADDELGVSGGGTPTISTVTTSSVPCMVGSFVLTVVGSIAYTLYK	2815	yes	20.19	none	none	none
AVH79535	Synechocystis sp. PCC 9413	Synechocystis	1	AVH79535_5	5	MSKIAICDLRLAGANLLSDPESYMYELDDCNVKSTEVNGGCLFLTPGIYFGMVVSAAILNQ	951	yes	23.29	none	none	none
AVH79535	Synechocystis sp. PCC 9413	Synechocystis	1	AVH79535_4	4	MSAIAIEDLNYLDIFLDGESYLGDLTETELNLRGGLVYSPYLEQQLSLRPTALTLCI	2012	yes	26.43	PF02755.15	RPEL repeat	1.2e-05
AVH79535	Synechocystis sp. PCC 9413	Synechocystis	1	AVH79535_3	3	MSAIQILDLTHNSANLFDDPESYLDELSNESLTLSEIQGGATPALGCVVSIVSFVAFAAAGAAIGAAVSNAIRQ	2557	yes	30.19	PF10439.9	Bacteriocin class II with double-glycine leader peptide	8.9e-08
AVH79607	Nostoc sp. PCC 9205	Nostoc	1	AVH79607_5	5	MASITVSNLNVAGLDLFNDQESYLSEVTDDELGLTHGGISPTFIAFGKGVLVATRASSGYCVRGLSMASGVSAYFIFR	1686	yes	17.97	PF12551.8	Poly-beta-hydroxybutyrate polymerase N terminal	0.015
AVH79607	Nostoc sp. PCC 9205	Nostoc	1	AVH79607_2	2	MASITVSNLNVAGLDLFNDQESYLSEVTDNELGLTHGGITPGSPVIIGTGIKMTVHAGLGFSAGISFTLATRQLRWWR	1421	yes	35.35	PF13799.6	Domain of unknown function (DUF4183)	4.5e-06
AVH79628	Nostoc sp. PCC 9201	Nostoc	1	AVH79628_5	5	MASIAISDIFPLGHDLLFDAESYMTDLNEKELDRVVGGTDVIAGIGIGLAIYALWVR	1260	yes	26.82	PF10439.9	Bacteriocin class II with double-glycine leader peptide	3.2e-06
AVH79628	Nostoc sp. PCC 9201	Nostoc	1	AVH79628_2	2	MASIAILDIRPVGHDLFFDGESYMADLSDNELERVVGGTEPISAAVAVSIGVAAGAAFLGGLWAALK	607	no	39.65	PF17508.2	Microcin V bacteriocin	1.7e-05
AVH79628	Nostoc sp. PCC 9201	Nostoc	1	AVH79628_3	3	MATIVISDISPVGYDLLFDSESYMTDISNNELDRVVGGTEPVSALVIGAIAFGTVVGAGLAGYGIGTLLK	316	no	34.43	PF10439.9	Bacteriocin class II with double-glycine leader peptide	2e-06
AVH79628	Nostoc sp. PCC 9201	Nostoc	1	AVH79628_4	4	MASITISDIRPVGHDLLLDTESYMTDLNENELNRVVGGTGVLIGIGIGIGIGLLIDAIR	1492	yes	27.98	PF12732.7	YtxH-like protein	0.00092
AVH79662	Desmonostoc muscorum PCC 7121	Desmonostoc	1	AVH79662_2	2	MASINILDIRPAGHDLLFDAESYMADINENELDRVVGGTEPITGAMALALGIAAGAAFMTGLWAGLR	1479	no	37.92	NF000539.0	plantaricin: plantaricin C family lantibiotic	1.8e-05
AVH79662	Desmonostoc muscorum PCC 7121	Desmonostoc	1	AVH79662_3	3	MASIAISDIHPAGYDLLFDGESYMTDLNSNELDRVIGGTEPVSLFFLGAAVVIGAGALGYAVGRALS	1201	no	35.06	PF10439.9	Bacteriocin class II with double-glycine leader peptide	4.1e-08
AWS47415	Streptosporangium sp. caverna	Streptosporangium	1	AWS47415_2	2	MTNGTSMMELVAGYNAYASANELSIAASVDAPATTPVCAASVAVSVASSWYCASAAASAAGGATYRLGC	73	yes	35.11	PF05356.11	Phage Coat protein B	5.6e-07
AWS47415	Streptosporangium sp. caverna	Streptosporangium	1	AWS47415_3	3	MKETMLIEEMVTGYRSYADISDLNVAAAVDAPATTPFCGALASFAFSYITTGGPGGG	342	yes	34.46	none	none	none
BAY08128	Calothrix sp. NIES-2098	Calothrix	1	BAY08128_2	2	MANIKVSELRPAGSEFFQDSESFLNDLNDMDTTSVHGGEGTNLVPYLQFGAKLLEYSVVGLGITTITSLVGTFSSTGTGIGSGSGSGGSTGV	1852	yes	45.2	PF04360.12	Serglycin	0.00027
BAY08128	Calothrix sp. NIES-2098	Calothrix	1	BAY08128_1	1	MANIKVSELSPAGSELFQDSESFLSDLNDIDTTSVHGGEGANLVPYLQFGAKLLEYSVVGLGITTIASLVGTFSSTGTGIGGGGSGSGGGSGSGSGSITIG	2289	yes	54.45	PF04360.12	Serglycin	0.00038
BAY08128	Calothrix sp. NIES-2098	Calothrix	1	BAY08128_4	4	MTRIVISDLHHNSSNLIVNAESFIEDINETESMFIHGGDGYAFREFLNFGVKVLEYALIGFAIFSIVSLVQSFLAPRQNQANLFPSINPPIG	1447	yes	22.95	PF00149.28	Calcineurin-like phosphoesterase	6.2e-06
BAY08128	Calothrix sp. NIES-2098	Calothrix	1	BAY08128_3	3	MANISIPDLHLSDNQNQLDELTPSEMNNLMGGSITINLPVNNSNKEFMDLFKALSDPNGKPINITIGTNSSLSNPLPSNPFDRAANPF	3449	yes	26.69	PF04604.13	Type-A lantibiotic	1.2e-05
BAZ29283	Cylindrospermum sp. NIES-4074	Cylindrospermum	1	BAZ29283_5	5	MASIKLSELQVAGSELFQDSESFINDLSDATSLSINGGDGSSSFGDYGDFGVKYLEYLVLGYGVDAIKYIVKSFSDVH	2345	yes	26.96	none	none	none
BAZ29283	Cylindrospermum sp. NIES-4074	Cylindrospermum	1	BAZ29283_1	1	MASIKLSELQVAGSELFQDSESFINDLSDATSLSINGGDANFQDYGDFGVKYLEYLILGYGVDAIKYIVKSFSDVNY	1757	yes	36.04	none	none	none
BAZ29283	Cylindrospermum sp. NIES-4074	Cylindrospermum	1	BAZ29283_3	3	MASIKLSELQVAGSELFQDSESFINDLSDATSLSINGGDGNSSSFGDYGDFGVKYLEYLVLGYGVDAIKYIVKSFSDVH	2048	yes	28.67	none	none	none
BAZ29283	Cylindrospermum sp. NIES-4074	Cylindrospermum	1	BAZ29283_2	2	MATIKLSELQVAGSELFQDSESFINDLSDATSLSINGGDGNSSSFGDYGDFGVKYLEYLILGYGVNAVKEAVKSFSHAD	3066	yes	31.83	none	none	none
BAZ29283	Cylindrospermum sp. NIES-4074	Cylindrospermum	1	BAZ29283_7	7	MAKISISDLYPTESETYISNLTNIEVLAVFGGDSNNYPQFLYFGFKFLHFVATMYAIDAISFLVSSFNTNDNI	1363	yes	10.97	none	none	none
BAZ29283	Cylindrospermum sp. NIES-4074	Cylindrospermum	1	BAZ29283_4	4	MASIKLSELQVAGSELFQDSESFINDLSDATSLSINGGDGSSSFGDYGDFGVKYLEYLVLGYGVDAIKYIVKSFSDV	2775	yes	28.3	none	none	none
BAZ30575	Cylindrospermum sp. NIES-4074	Cylindrospermum	1	BAZ30575_1	1	MSNIQLSELNPAGSELFMDSESFLQDLTDTDAMVVQGGQGGDINKLLEFGVGAYAINGVISLAKSFSGAAVPGPRPGPEPEPEPDIDE	2758	yes	50.07	none	none	none
BAZ33272	Cylindrospermum sp. NIES-4074	Cylindrospermum	1	BAZ33272_4	4	MANIKVNDIQPAGLELFADAENFMHQLTDDEITGIVGGLPKDVYPLYDKNTVIISYIYVPK	396	yes	16.78	none	none	none
BAZ42602	Calothrix sp. NIES-4101	Calothrix	1	BAZ42602_1	1	MATISISNLRATGANLFADSESYLSELTDAELNETKGGSIIAGAAFVAGVIIGVAISVRIAKEVC	956	yes	38.66	PF02038.16	ATP1G1/PLM/MAT8 family	4.4e-05
BAZ42602	Calothrix sp. NIES-4101	Calothrix	1	BAZ42602_5	5	MATISISNLRNSGVELFLDSESYLHELTETELNTTKGGSPFIIFSPTLISPLTPILF	1226	yes	17.84	NF033215.1	BlpC_Streptocco: quorum-sensing system pheromone BlpC	1.3e-05
BAZ42602	Calothrix sp. NIES-4101	Calothrix	1	BAZ42602_2	2	MATISISQLSATGANLLADSESYLNELTDAELNETKGGSLFATAIFVIGVAAGYKASKAVIEELT	1705	yes	32.93	NF000539.0	plantaricin: plantaricin C family lantibiotic	1.3e-05
BAZ42602	Calothrix sp. NIES-4101	Calothrix	1	BAZ42602_3	3	MATISISNLNTSGAELFLDAETYLHELTDSELDMTKGGCFDIPPIFKPTTILKTTSIVGYILG	657	yes	22.55	none	none	none
BBD63560	Nostoc sp. HK-01	Nostoc	1	BBD63560_1	1	MAEIKITELRPTGSELFEDSETFLKELNDDEMTVTLGGGDSLVSISVDTVDKSFISVGGDVSISK	1851	yes	37.12	none	none	none
BBD63560	Nostoc sp. HK-01	Nostoc	1	BBD63560_3	3	MAEIKITELRPTGSELFEDSETFLKELNDDEMTVTLGGGDSLLSISADTVDKSFISVGGDVSISK	2119	yes	35.79	none	none	none
BBD63560	Nostoc sp. HK-01	Nostoc	1	BBD63560_4	4	MAEIKITELRPTGSELFEDSETFLKELNDDEMTVTLGGGDSLLSISADTVDKSFISVGGDVSISK	2387	yes	30.46	none	none	none
BBD63560	Nostoc sp. HK-01	Nostoc	1	BBD63560_2	2	MAEIKITELRPIGSELFEDSETFLKELNDDEMTVTLGGGDSLLSISADTVDKSFISVGGDVSISK	1583	yes	35.84	none	none	none
BBD66616	Nostoc commune HK-02	Nostoc	1	BBD66616_1	1	MARIQITDLNPSQSELLLCELTAEEMLEINGGGWFKRIIGAALIVVGAFTTPVGIGAALIGAGGAIIASEEF	3464	yes	40.44	PF16934.5	Two-component Enterococcus faecalis cytolysin (EFC)	0.00034
CEJ45116	Chrysosporum ovalisporum	Chrysosporum	1	CEJ45116_3	3	MANITLSQLYSIGSELFHDSETFFHELSHTDSIFRDEYAVVGGIIFTALTGAFVSIYGIGHATYVAKSYSGTYPYPL	1928	yes	32.82	PF16080.5	Bacteriophage holin family HP1	2e-05
CEJ45116	Chrysosporum ovalisporum	Chrysosporum	1	CEJ45116_2	2	MANITLSQLHPAGSELFQDAESFLNELSNIDSISGGQIVGTAATGTIATQAAVSNPFTLTKLAEAYVYVYAIEHVTFLAKSFSLVL	2739	yes	40.75	none	none	none
CEJ45116	Chrysosporum ovalisporum	Chrysosporum	1	CEJ45116_5	5	MANIILSQLHHAGSELFHDSEGFLHQLSDVDPISGGQATVATATTNALSNLAILFQILDAYTLVDAMDQVTLLAKSFSINIY	2320	yes	26.57	none	none	none
CEJ45116	Chrysosporum ovalisporum	Chrysosporum	1	CEJ45116_6	6	MAKIIISQLHPIDLESFLLEITDMYSLSVYGSEDYAYHYGYYQLLNFTYHLVDFVLSTFAIYSIVSLAKSFVATECGYSSHLFVPVSLFTQQLT	1407	yes	17.3	none	none	none
CEJ45116	Chrysosporum ovalisporum	Chrysosporum	1	CEJ45116_1	1	MANITLSQLHPAGSELFQDAESFLNELSNIDSISGGQIVGTAATGTIATQAAVSNPFTLTKLAEAYVYVYAIEHVTFLAKSFSLVL	3154	yes	40.75	none	none	none
OBQ01900	Anabaena sp. AL09	Anabaena	1	OBQ01900_3	3	MANIVISELRSAGSELFQDSETFMNDLTEEDMINTLGGQKSWSTRVCQAVQVLFTADSI	595	yes	20.42	none	none	none
OBQ01900	Anabaena sp. AL09	Anabaena	1	OBQ01900_2	2	MANIVISELRPAGSDLFMDSESYLTDLTDNELHMTKGGSTWFCAGVIVGMIITKL	1602	yes	24.3	none	none	none
OBQ18150	Aphanizomenon flos-aquae LD13	Aphanizomenon	1	OBQ18150_1	1	MARITISDINVSKKKVLLEEINNPESVYIFGGSSNNFRELVKFGIKSMEFILLAYAIDSISYLGSSFNSNY	1256	yes	9.12	none	none	none
OBQ18754	Anabaena sp. WA113	Anabaena	1	OBQ18754_2	2	MATITLSQLNTTGSELFADSESYLNELNDAASVSINGGGSDFSGFSAYGDFGVKYLEFLVDGYAIASIKHIAKSFSNDSHYGH	1604	yes	37.95	none	none	none
OBQ18754	Anabaena sp. WA113	Anabaena	1	OBQ18754_3	3	MANIIISDLDNADEKKFIFNLNNLDKASIFGGGYNDVNQILNYGIKALEFVLVIYAIDSISFLTKTFKK	1239	yes	26.15	none	none	none
OBQ36138	Anabaena sp. CRKS33	Anabaena	1	OBQ36138_1	1	MASITLSQLNVTGSELFQDSESYLDDLNDASSVAVHGGGSNYSGFGEYGDFGVKYLEYLVGGYAIASIKSIAQSFSHSDSASRHW	1705	yes	35.3	none	none	none
OBQ36138	Anabaena sp. CRKS33	Anabaena	1	OBQ36138_3	3	MATIRIYDLPISQEIEFIKDLNNKELSSSFGGGDNDMNQIFYYGVKGLEFMLAIFAIDSILFLTNKVRNFL	1248	yes	17.43	none	none	none
OLE73832	Cyanobacteria bacterium 13_1_40CM_2_61_4	Cyanobacteria	1	OLE73832_2	2	MSTWSILRQQGSQVLATKDS	1102	no	-49.34	none	none	none
PZN41733	Actinobacteria bacterium	Actinobacteria	1	PZN41733_2	2	MNATSMMELVAGYDTYAAPAELNLEASVDAPATSPVCAVSAASSWYCVSASLGASAGATYKVGC	127	yes	48.3	none	none	none
PZN41733	Actinobacteria bacterium	Actinobacteria	1	PZN41733_3	3	MQEMLTQELVTGYRSYAEAADLTVAAAVDAPATSPFCGFFASFAFSYITTNGPG	393	yes	44.53	none	none	none
QKI29067	Streptomyces cacaoi	Streptomyces	1	QKI29067_1	1	MGEVVEMVAGFDTYADVEELNQIAVGEAPESSAPCTIYASVSASISATASWGC	2484	yes	31.9	none	none	none
RCJ14929	Nostoc sp. ATCC 43529	Nostoc	1	RCJ14929_2	2	MANITLSELYVSGSELFAGGESFLNDLSDVDSISGGSEWSGFSDLSTLTKLAEAYVDTYAIGHIAFIAKSYSNSSVA	1636	yes	32.94	none	none	none
RCJ14929	Nostoc sp. ATCC 43529	Nostoc	1	RCJ14929_4	4	MANITLSELYVSGSELFEGTESFLNDLSDVDSISGGSQWSGFSDISTLTKLAEAYVDTYAIGHITFVAKSYSNGTYY	2005	yes	31.03	none	none	none
RCJ14929	Nostoc sp. ATCC 43529	Nostoc	1	RCJ14929_1	1	MANITLSELYVSGSELFEGTESFLNDLSDADSISGGEYASFSDISTLTKLAEAYVNTYAIGHITYVAKSYSNGTYY	3013	yes	33.28	PF14202.6	Transposon-encoded protein TnpW	1e-05
RCJ14929	Nostoc sp. ATCC 43529	Nostoc	1	RCJ14929_6	6	MANITLSELYVSGSELFEGTESFLNDLNDADSISGGNYYNFSDISGLTKLAEAYVDTYAIGHVTFVAKSYSNGTYY	3396	yes	26.72	none	none	none
RCJ14929	Nostoc sp. ATCC 43529	Nostoc	1	RCJ14929_3	3	MANITLSELYISGSELFEGTESFLNDLSDADSISGGEYANFSDISTLTKLAEAYVNTYAIGHITYVAKSYSHGGY	2643	yes	32.93	none	none	none
RCJ19623	Nostoc minutum NIES-26	Nostoc	1	RCJ19623_3	3	MANIEISDLNPAGSELFKDSESFMSDLIDSEVGSIQGGWRWSGWKCGLSIVASAGLGSPGIAVTVWAATTSRIKP	2304	yes	26.36	PF10439.9	Bacteriocin class II with double-glycine leader peptide	1.9e-06
RCJ19623	Nostoc minutum NIES-26	Nostoc	1	RCJ19623_1	1	MANINISDLRPTGLELFSDSEGYMDELSYSEYNSIYGGLTPALVWSAVTVAARISSARCAIKASAVSVGVASAVSGWFTAGK	1601	yes	41.27	PF16934.5	Two-component Enterococcus faecalis cytolysin (EFC)	0.00021
RCJ19623	Nostoc minutum NIES-26	Nostoc	1	RCJ19623_5	5	MSNILIKDLNVPGSYLFSGEESYLNEINDKELNFNSGGISPIIGAFVLSYSASYYARQIHDKNKGIIAWL	1325	yes	18.44	none	none	none
RCJ19623	Nostoc minutum NIES-26	Nostoc	1	RCJ19623_2	2	MAHIAISNLHPAGYELFSDSEQFINDLSEEELNIQGGLISRPWFSPYCRPIPTPRPIYPPIWRLTVQIEKRG	1894	yes	29.65	none	none	none
RCJ30949	Nostoc minutum NIES-26	Nostoc	1	RCJ30949_3	3	MANINLSELHAAGSELFQDTESFLNELSDVDSISGGNYGSNVSDISGLTKLAEAYVLTYGVGHIAVITKSYSHSNYGFGY	3695	yes	31.29	none	none	none
RCJ30949	Nostoc minutum NIES-26	Nostoc	1	RCJ30949_1	1	MATINLAELYAAGSELFQDTESFLNELSDVDSISGGNYGSNVSDISGLTKLAEAYVLTYGVGHIAVITKSYSHGGYGFGY	4101	yes	36.75	none	none	none
RCJ30949	Nostoc minutum NIES-26	Nostoc	1	RCJ30949_4	4	MATINLSELHAAGSELFQDSESFLNELSDVDSISGGSYATESVSDLSGLTKLAEAFVLTYGVGHIVVLTKSYSNNY	2928	yes	30.88	PF12456.8	Inositol phosphatase	1e-05
RCJ30949	Nostoc minutum NIES-26	Nostoc	1	RCJ30949_5	5	MATINLSELHAAGSELFQDSESFLNELSDVDSISGGSYATESVSDLSGLTKLAEAFVLTYGVGHIVVLTKSYSNNY	3300	yes	29.77	PF12456.8	Inositol phosphatase	1e-05
RCJ30949	Nostoc minutum NIES-26	Nostoc	1	RCJ30949_2	2	MATINLFELHAAGSELFQDSESFLNELSDVDSISGGSESLSNVSDLSGLTKLAEAYVLTYGVGHIAVLVTSYSHDYTV	2134	yes	33.45	none	none	none
RCJ30949	Nostoc minutum NIES-26	Nostoc	1	RCJ30949_6	6	MATINLFELHAAGSELFQDSESFLNELSDVDSISGGSYATESVSDLSGLTKLAEAFVLTYGIGHIVVLTKSYSNDY	2534	yes	29.06	PF12456.8	Inositol phosphatase	1.2e-05
RCJ30949	Nostoc minutum NIES-26	Nostoc	1	RCJ30949_9	9	MAKIIISDLHTADSETYLTVMNDIDSMFVYGGDDYALSELINFAYKFLDFVVAIFGIYNIALLAKSFNASESNSSLSIYL	1401	yes	23.38	PF12850.7	Calcineurin-like phosphoesterase superfamily domain	8.9e-06
RCJ40334	Nostoc punctiforme NIES-2108	Nostoc	1	RCJ40334_5	5	MSSITVSDLHSTDISLFGNSESFLKDLSYKDSNEVYGGSAAYALGYAIGWLIGHL	1323	yes	20.86	PF16397.5	Domain of unknown function (DUF5006)	1.1e-05
RCJ40334	Nostoc punctiforme NIES-2108	Nostoc	1	RCJ40334_3	3	MATIKIDNLSVTGNEFFSDSESYLDQLTELSESDALSIQGGITPVIIITLTPFLLG	754	yes	28.41	NF000539.0	plantaricin: plantaricin C family lantibiotic	1.2e-05
RCJ40850	Nostoc minutum NIES-26	Nostoc	1	RCJ40850_2	2	MAEIKITELRPIGSELFEDSETFLKELNDDEMTVTLGGGDSLLSISADTVDKSFISVGGDVSISK	1851	yes	34.19	none	none	none
RCJ40850	Nostoc minutum NIES-26	Nostoc	1	RCJ40850_1	1	MAEIKITELRPTGSELFEDSETFLKELNDDEMTVTLGGGDSLLSISADTVDKSFISVGGDVSISK	1583	yes	35.21	none	none	none
RCJ40850	Nostoc minutum NIES-26	Nostoc	1	RCJ40850_3	3	TGSELFEDSETFLKELNDDEMTVTLGGGDSLLSISADTVDKSFISVGGDVSISK	2119	yes	17.93	none	none	none
ROV70439	Streptomyces globisporus	Streptomyces	1	ROV70439_1	1	MNEIDLAAGFDTYADVNEMVADGTPDEAPSPQTIVSLSVVASIKWGC	159	yes	40.32	none	none	none
SAP16385	Nonomuraea gerenzanensis	Nonomuraea	1	SAP16385_2	2	MAEKDLVDGFENYTDPEELAFDENGEEESPSTPWCIASIVITASAGC	327	yes	38.46	none	none	none
SLE69095	Mycobacteroides abscessus subsp. bolletii	Mycobacteroides	1	SLE69095_3	3	MAQNVNLMELADAHTAFTTSAELGSDAASDAPATTPVCVGIIVGATLGAGC	92	yes	15.49	PF09237.11	GAGA factor	4.6e-06
SLE69095	Mycobacteroides abscessus subsp. bolletii	Mycobacteroides	1	SLE69095_1	1	MAQNVNLMELADAHTAFATSAELGSDAASDAPATTPFCAGVVIGLTLTAGC	464	yes	22.52	PF09237.11	GAGA factor	1.2e-05
SNT25203	Streptosporangium subroseum	Streptosporangium	1	SNT25203_4	4	MKETMLIEEMVTGYRSYADISDLNVAAAVDAPATTPFCGALASFAFSYITTGGPGGG	340	yes	32.67	none	none	none
SNT25203	Streptosporangium subroseum	Streptosporangium	1	SNT25203_1	1	MTNGTSMMELVAGYNAYASANELSIAASVDAPATTPVCAASVAISVASSWYCASAAASAAGGATYRIGC	72	yes	39.58	PF05356.11	Phage Coat protein B	4.7e-07
TAE59458	Nostocales cyanobacterium	Nostocales	1	TAE59458_1	1	MANIKLSELHVAGSELFQDSESFLNEMNDSDGILVKGGSGSYFPDLIDYSIKGKEFALLGFAIDSAVSLAKSFSKHGDW	2334	yes	40.95	none	none	none
TAE59458	Nostocales cyanobacterium	Nostocales	1	TAE59458_3	3	MANIKLHELSVAGSELFQDSESFLNEMNDSDGILVQGGSGSYLTELLDYSIKGKEFALLGFAIDSAVSLAKSFSSHGDW	1974	yes	36.02	none	none	none
TAE59458	Nostocales cyanobacterium	Nostocales	1	TAE59458_2	2	MANIQLNELNIAGSELFQDTESFLNEMNDSDGILVKGGSGSYLPDLLDYSIKSYEFALIGFAIDSVVSLAKSFSKHD	1590	yes	38.27	none	none	none
TAE59458	Nostocales cyanobacterium	Nostocales	1	TAE59458_6	6	MVKIQITDLDHLAKQPFIIDINELENMHILGGANQNFSALFNFAIKSMEFVLIAYAIDAISRLVTSFSERY	1260	yes	30.79	none	none	none
TAG67909	Oscillatoriales cyanobacterium	Oscillatoriales	1	TAG67909_1	1	MATIKIADLTPIGSEFFTDSESYLNELTDDELNMTKGGSSIWCSIAITVITYYTFKPVYVY	2282	yes	27.2	NF000539.0	plantaricin: plantaricin C family lantibiotic	5.5e-06
TCN71580	Streptomyces sp. BK387	Streptomyces	1	TCN71580_1	1	MMNETAELATGFDAYTDLEELAAAVEASTEAKTPGFSITPTFSLTGQH	137	yes	38.74	none	none	none
TRT88208	Microcystis aeruginosa Ma_AC_P_19900807_S299	Microcystis	1	TRT88208_1	1	MAKIVVSDLRPAGADLFSDSESFLHDLTETEIDTTQGGITPFIIGVGVGILISARYCKA	825	yes	32.98	none	none	none
TVP62740	Nodularia sp. (in: Bacteria)	Nodularia	1	TVP62740_2	2	MANIKLSQLHAAGSELFNDSESFLNELSDVDSISGGQVGYATGASNPFTLTKLAEAFVTIYAIEHVTILAKSFSVTVY	2910	yes	33.92	none	none	none
TVP62740	Nodularia sp. (in: Bacteria)	Nodularia	1	TVP62740_1	1	MANIKLSQLHAAGSELFNDSESFLNELSDVDSISGGQIGYATGVSNPITLTKLAEAFVTVYAIEHVTILAKSFSLGFVY	2536	yes	37.79	none	none	none
TVP62740	Nodularia sp. (in: Bacteria)	Nodularia	1	TVP62740_3	3	MATITLSQLYATGSELFNDSESFLNELSDIDSNSQGQYNVVGGIITFTALAGTFVGTYAIGHATYVAKSYSQPHYGYGYGRRF	2151	yes	33.02	PF14362.6	Domain of unknown function (DUF4407)	4.9e-06
TVP62740	Nodularia sp. (in: Bacteria)	Nodularia	1	TVP62740_4	4	MAGIIISELHPTDLESFLIEITDMSSISVYGGNQYAIDYAFHQMLNFTYRLMDFMLSVFAIYSITSLVQSFMTTTEFNFVPEHFFPF	1435	yes	24.17	none	none	none
TVP62740	Nodularia sp. (in: Bacteria)	Nodularia	1	TVP62740_6	6	ELSDVDSISGGQIGYATGVSNPITLTKLAEAFVTVYAIEHVTILAKSFSLGFVY	3295	yes	16.19	none	none	none
TVP63782	Nodularia sp. (in: Bacteria)	Nodularia	1	TVP63782_4	4	MASITVSNLYPLGSDLFMDSESFMDALNDNELAEINGGVTPAVITTIATKWFIGAAVGGAIVGSIIYW	1946	yes	33.87	PF10439.9	Bacteriocin class II with double-glycine leader peptide	5.9e-10
TVP63782	Nodularia sp. (in: Bacteria)	Nodularia	1	TVP63782_5	5	MSTINIQDIKVAGSDLFFDEETYLNELSHDEIGAAKGGITPTVAGTIALSSAFVLSYNLSKIGTELKNKFF	1654	yes	30.78	none	none	none
TWH40986	Calothrix desertica PCC 7102	Calothrix	1	TWH40986_3	3	MPSNSGLPHSAVIRLTLALAQHYG	5391	yes	-1.75	none	none	none
WP_002735885	Microcystis aeruginosa TAIHU98	Microcystis	1	WP_002735885_4	4	MANITISDLRPAGADLFSDSESYMHELTDSEMLDTLGGCRVIITWTLFCIEVGVNRIGDFD	1406	yes	25.51	none	none	none
WP_003963573	Streptomyces clavuligerus	Streptomyces	1	WP_003963573_2	2	MNTEDLMGGYAAYTSPNAAVQEAATTHAEAFTPTITVTPTTEVIVSVVVSLLTPHV	7098	yes	42.49	none	none	none
WP_006195640	Nodularia spumigena UHCC 0039	Nodularia	1	WP_006195640_8	8	MATITVSQLYATGSELFDDSENFLNELSDVDSSSLGEYNVVGGIITFTALTGTFVGTYAIGHATYVAKSYSQPYYGHRRRF	2200	yes	35.77	PF02973.16	Sialidase, N-terminal domain	1.4e-05
WP_006195640	Nodularia spumigena UHCC 0039	Nodularia	1	WP_006195640_7	7	MANITLSELHVAGSELFNDSESFLNEFSDVDSISGGQVGYAGGVSDPTTLMKLAEAFVTVYAIGHVTVLAKSFSASNV	4722	yes	36.66	none	none	none
WP_006195640	Nodularia spumigena UHCC 0039	Nodularia	1	WP_006195640_9	9	MANIKLFELNTTGSELFLDSESFLNELNDVDSISGGSTSSQGYDQGYGYKTVSGISTLTKLAEAFVTVYAIGHVTVLAKSFSHGY	5128	yes	35.02	none	none	none
WP_006195640	Nodularia spumigena UHCC 0039	Nodularia	1	WP_006195640_5	5	MANIKLSELHAAGSELFHDSESFLNEFSDVDSISGGQVTVATGATYVASNASTLTKLAEAFVITYAVEHVTILAKSFSITGIY	2688	yes	38.06	none	none	none
WP_006195640	Nodularia spumigena UHCC 0039	Nodularia	1	WP_006195640_2	2	MANIKLSELHAAGSELFHDSESFLNEFSDVDSISGGQVTIATGTVATGATYVASNASTLTKLAEAFVITYAVEHVTIVAKSFSITGVY	3480	yes	43.82	none	none	none
WP_006195640	Nodularia spumigena UHCC 0039	Nodularia	1	WP_006195640_1	1	MANITLSELHAAGSELFQDSESFLNEFSDVDSISGGQIGYGAGIGAQVAVSDPTTLTKLAGAFVTVYAIGHVTVLAKSFSGI	4312	yes	45.77	none	none	none
WP_006195640	Nodularia spumigena UHCC 0039	Nodularia	1	WP_006195640_10	10	MAGIIISELHSTNSESFLVEITDTCFLSIYGGNEYALDYAFHQMLNFSYRLMDFMLSAFAIYSIVSLAQSFITTTDFNFAPVQFTPFYLLNSN	1485	yes	23.89	PF10852.8	Protein of unknown function (DUF2651)	2.1e-05
WP_006195640	Nodularia spumigena UHCC 0039	Nodularia	1	WP_006195640_6	6	MANITLSELHAAGSELFHDSESFLNEFSDVDSISGGGAVAATGATYVASNPLTLTKLAEAFVVVYAIEHVTIVAKSFSITGVY	3891	yes	37.47	none	none	none
WP_006195640	Nodularia spumigena UHCC 0039	Nodularia	1	WP_006195640_4	4	MANIKLSELHAAGSELFHDSESFLNEFSDVDSISGGQVTIATGATYVASNASTLTKLAEAFVITYAVEHVTILAKSFSITGVY	3084	yes	39.89	none	none	none
WP_006197379	Nodularia spumigena CCY9414	Nodularia	1	WP_006197379_2	2	MANIVISDLRPAGSELFMDSESYLTDLTNDELNHTSGGLFWFGVAVGLAISHLLRNH	943	yes	14.21	none	none	none
WP_006513161	Leptolyngbya sp. PCC 7375	Leptolyngbya	1	WP_006513161_3	3	MSVISISELYPVGAKLFSDAESFLGDLNDDALSNINGGETFTTNSIFCTTKPCGEDFSVFLPTTTGRPIVVMKNGVLSFA	3881	yes	17.8	none	none	none
WP_006513161	Leptolyngbya sp. PCC 7375	Leptolyngbya	1	WP_006513161_2	2	MSSIKIDSLSPAGLEMMQNSESFLTELGDAEDTIYGGRIYSDGRVAALSVLTTPACIASFIASNIVTNI	757	yes	20.83	none	none	none
WP_006619051	Arthrospira platensis YZ	Arthrospira	1	WP_006619051_7	7	MNFKVAKTIVIVRELGNNKSHRERQIINLITSKSNLFKEETKMANITISDLRPTGADLFSDSESYLTDLNDQEMMWLLGQGRYRGFSYQRFDGGLSIFYCKWS	1096	yes	18.83	none	none	none
WP_008178764	Moorea producens 3L	Moorea	1	WP_008178764_1	1	MANIKVNNIKPAGAELFGDSESFIKDLQDNELELAGGSECPSPFPTSHPGNCPTGTEVF	1231	yes	20.32	none	none	none
WP_008380405	Gordonia malaquae NBRC 108250	Gordonia	1	WP_008380405_2	2	MNEKLIAGYRQFASADEFGAASAATPAITPTITITVSVASAVSGWQTNEHGC	3868	yes	25.4	none	none	none
WP_008380405	Gordonia malaquae NBRC 108250	Gordonia	1	WP_008380405_4	4	MLIMNEKLIAGYQTFVSTDEFAGAAASVDTPAISPTPATPISTLSVASFTSGATTYTIGC	3692	yes	21.41	none	none	none
WP_009079852	Amycolatopsis sp. AA4	Amycolatopsis	1	WP_009079852_1	1	MHTMTETDLLSGYTAYTTAEELDQFDGKAAPAATTPVLAPILIRASIIAARSSQQCAAGIAAAGGGIWRTIRKVC	2791	yes	43.07	none	none	none
WP_009343975	Cylindrospermopsis raciborskii CENA303	Cylindrospermopsis	1	WP_009343975_2	2	MASIKLDQLQSTGSELFQDSESFLNDMSDINSISIHGGFNSTVSDMSIFTKLAEAFVNAYGIAHIAYLAKSYSSGV	2164	yes	32.9	none	none	none
WP_009343975	Cylindrospermopsis raciborskii CENA303	Cylindrospermopsis	1	WP_009343975_1	1	MASIKLGQLETTGSELFQDSESFLNEMSDVNSISVYGGGSDFGDISVFTKLGEAFVNTYGIGNIAYLAKSYSDHDYYW	1864	yes	42.6	PF00389.30	D-isomer specific 2-hydroxyacid dehydrogenase, catalytic domain	9.7e-06
WP_009343975	Cylindrospermopsis raciborskii CENA303	Cylindrospermopsis	1	WP_009343975_4	4	MAKIIINDLAPINSETFINDLNNHNSQAVFGGENPYFDGLFNFGIKTLEFMVVITAINAISFLAYSFRE	1246	yes	16.98	none	none	none
WP_009343975	Cylindrospermopsis raciborskii CENA303	Cylindrospermopsis	1	WP_009343975_6	6	MQANGSELFQDSESFLNEMSDINSISVHGGGYYDFSDMSVFTKLAEAFVNTYGIGNIAYLAKSYSDYNY	1553	yes	11.08	none	none	none
WP_010996095	Nostoc sp. PCC 7120 = FACHB-418	Nostoc	1	WP_010996095_1	1	MAFIAVKELQATGAELFQDSESFLNELNNLDNSVHGGGYNYSNTTNGVLDLAVKGFEFGVITYGIDAIGHLAKSYSDAGNGYY	2809	yes	43.91	none	none	none
WP_010996095	Nostoc sp. PCC 7120 = FACHB-418	Nostoc	1	WP_010996095_4	4	MAKIIVSELHSHDSENFLTDLNYEESGLIYGGNQYSYNQIFILAEKIFRFITISFAIATILKIVNSYIGNSHK	1441	yes	13.95	none	none	none
WP_011321056	Trichormus variabilis 0441	Trichormus	1	WP_011321056_5	5	MAFIAVKELQVTGAELFQDSESFLNELNNLDNSVHGGGDYSNTTNGVLDLAAKGFEFGVITYGIDAIGHLAKSFSSAA	3040	yes	40.34	none	none	none
WP_011321056	Trichormus variabilis 0441	Trichormus	1	WP_011321056_2	2	MAFIAVKELQVTGAELFQDSESFLNELNNLDNSVHGGGDYSNTTNGVLDLAVKGFEFGVITYGIDAIGHLARSFSSAA	2344	yes	44.31	none	none	none
WP_011321056	Trichormus variabilis 0441	Trichormus	1	WP_011321056_3	3	MAFIAVKELQATGAELFQDSESFLNELNNLDNSVHGGGDYSNTTNGVLDLAVKGFEFGVITYGIDAIGHLAKSFSSAA	2690	yes	43.06	none	none	none
WP_011321056	Trichormus variabilis 0441	Trichormus	1	WP_011321056_4	4	MAFIAVKELQVAGAELFQDSESFLNELNNLDNSVHGGGDYSNTTNGVLDLAVKGFEFGVITYGIDAIGHLAKSYSSAGYY	3810	yes	40.75	none	none	none
WP_011321056	Trichormus variabilis 0441	Trichormus	1	WP_011321056_1	1	MAFIAVKELQVTGAELFQDSESFLNELNNLDNSVHGGGDYSNTTNGVLDLAAKGFEFGVITYGIDAIGHLAKSYSDAGYY	3422	yes	45.39	none	none	none
WP_011321056	Trichormus variabilis 0441	Trichormus	1	WP_011321056_8	8	MARITVSELHLYGSENFLTELNHEESRLIHGGNKYSYDQISVLAEKIFQFITISFAIAAILKIVDSYIGNRYK	1706	yes	17.25	none	none	none
WP_011610106	Trichodesmium erythraeum IMS101	Trichodesmium	1	WP_011610106_1	1	MANINISDLSPAGADLFLDSESYLNDLTEGEMTNTLGGSRWWNRLKDWFRTR	1746	yes	20.87	none	none	none
WP_011610106	Trichodesmium erythraeum IMS101	Trichodesmium	1	WP_011610106_2	2	MANINISDLSPAGADLFLDSESYLNDLTEGEMTNTLGGKGSFTFCGKRISWSICWGY	803	yes	18.11	none	none	none
WP_012409362	Nostoc punctiforme PCC 73102	Nostoc	1	WP_012409362_2	2	MASIALSQLNTTGSELFQDSESFLSDLNNVDTITIYGGGDEGEVSNVSEGIEPLLAYGIKGQEFALLGFGASLVAHIVKSFSDTDTHY	2727	yes	42.86	none	none	none
WP_012409362	Nostoc punctiforme PCC 73102	Nostoc	1	WP_012409362_4	4	MASIALSQLNTTGSELFQDSESFLSDLNNVDTITIYGGGDEGDVSNVSEGIEPLLAYGIKGQEFALLGFGASLTAHIVKSFSDTDTNL	3107	yes	41.46	none	none	none
WP_012409362	Nostoc punctiforme PCC 73102	Nostoc	1	WP_012409362_3	3	MASIALSQLNTTGSELFQDSESFLSDLNNVDTITIYGGGDEGEVSNVSEGIEPLLAYGIKGQEFALLGFGASLTAHIVKSFSDTDTHY	3487	yes	41.9	none	none	none
WP_012409362	Nostoc punctiforme PCC 73102	Nostoc	1	WP_012409362_6	6	MASIALSQLNTTGSELFQDSESFLSDLNNVDTITIYGGGNEGEVSNVAEGIEPLLGYGTKGLEFGLMGFGASLTAHIVKSFSDTDTDL	4247	yes	37.52	PF11265.8	Mediator complex subunit 25 von Willebrand factor type A	1.4e-05
WP_012409362	Nostoc punctiforme PCC 73102	Nostoc	1	WP_012409362_5	5	MASIALSQLNTTGSELFQDSESFLSDLNNVDTITIYGGGDEGDVSNVSEGIEPLLAYGIKGQEFALLGFGASLTAHIVKSFSDTDTNL	3867	yes	40.39	none	none	none
WP_012409362	Nostoc punctiforme PCC 73102	Nostoc	1	WP_012409362_8	8	MASIALSQLNTTGSELFQDSESFLSDLNNVDSITVYGGGYEISSVAHGIEPLLAYGIKGQEFALLGFGASLTAHIVKSFSDTDTHY	1979	yes	28.7	none	none	none
WP_012409362	Nostoc punctiforme PCC 73102	Nostoc	1	WP_012409362_9	9	MFLGFESMPKITISDLHTDDSEGFLIDISNLDYISIYAGADDDLAQILNYGLKNLNFALLAFAIHEVAELAESFNTQ	1464	yes	22.04	none	none	none
WP_012409362	Nostoc punctiforme PCC 73102	Nostoc	1	WP_012409362_7	7	MASIALSQLNTTGSELFQDSESFLSDLNNVDSITVYGGGYEISSVAHGIEPLLAYGIKGQEFALLGFGASLTAHIVKSFSDTDTHY	2353	yes	36.55	none	none	none
WP_012409787	Nostoc punctiforme PCC 73102	Nostoc	1	WP_012409787_5	5	MATICISDIKPAGSSLFIDQESFLNELSDEQAGSSHGGFTIFALISLGLASAALGYAVGRNDR	2535	yes	24.43	none	none	none
WP_012409787	Nostoc punctiforme PCC 73102	Nostoc	1	WP_012409787_3	3	MATIKISDLRPAGYDLFADQESYLMSLTEDELGNQGGAIWTVITTASSGACLSIGLTVVGVTFVASYIKGRYY	2140	yes	39.44	none	none	none
WP_012409787	Nostoc punctiforme PCC 73102	Nostoc	1	WP_012409787_4	4	MSTIKIDNLSVTGSELFDDSESYLDQLSESDALSIQGGLNSTIITVTTVTATTTTAIPTTETTAILTIKTITLATLGLD	3458	yes	32.89	PF06933.11	Special lobe-specific silk protein SSP160	1.7e-05
WP_012595952	Rippkaea orientalis PCC 8801	Rippkaea	1	WP_012595952_5	5	MANIAISNLYPAGTDLFVDSESFMAELTDDQLNETHGGAFWFGVAVGLAISHVLR	502	yes	27.01	NF033215.1	BlpC_Streptocco: quorum-sensing system pheromone BlpC	9e-06
WP_012597836	Gloeothece citriformis PCC 7424	Gloeothece	1	WP_012597836_6	6	MSNISITDINPSGSSLFADVESYLNDLSEQDINNILGGGKVSIAWSLICVEW	305	yes	23.93	NF000539.0	plantaricin: plantaricin C family lantibiotic	1.3e-06
WP_012597836	Gloeothece citriformis PCC 7424	Gloeothece	1	WP_012597836_5	5	MSNISITDINPSGSSLFADVESYLNDLSEQDINDILGAGRVTIAWTLIDIQW	762	yes	27.11	none	none	none
WP_012597836	Gloeothece citriformis PCC 7424	Gloeothece	1	WP_012597836_3	3	MSNISITDINPSGSSLFADVESYLNDLSEQDINDILGAGRVTIAWTLIDIQW	993	yes	29.52	none	none	none
WP_012597836	Gloeothece citriformis PCC 7424	Gloeothece	1	WP_012597836_4	4	MSNISITDINPSGSSLFADVESYLNDLSEQDINDILGAGRVTIAWTLIDIQW	1223	yes	28.7	none	none	none
WP_012597836	Gloeothece citriformis PCC 7424	Gloeothece	1	WP_012597836_7	7	MSNISITDINPSGSSLFADVESYLNDLSEQDINNILGGGKVSIAWSLICVEW	535	yes	22.41	NF000539.0	plantaricin: plantaricin C family lantibiotic	1.3e-06
WP_012868258	Sanguibacter keddieii DSM 10542	Sanguibacter	1	WP_012868258_2	2	MTLDQDIIAGYTAYTDAGELAAAPAADAAGVTPTTTTLTISSHPCIAASIAGVSVVSAVSVDNTFDHGC	1582	yes	47.3	PF00356.21	Bacterial regulatory proteins, lacI family	0.00021
WP_012868258	Sanguibacter keddieii DSM 10542	Sanguibacter	1	WP_012868258_1	1	MALNQDIIAGYTAYTDAGELAAAPAADAAGVTPTTTTLTISSAPCTAASIGAVSAISAVSVDNTFDHGC	1245	yes	49.61	none	none	none
WP_013190203	Trichormus Nostoc azollae 0708	Trichormus	1	WP_013190203_4	4	MTRIIIADLHLIDSEVFINEITSTDEQSVFGGRYEYRPQILEVGVKALEFIVMLAAIDAISFLTTSFIRTD	1284	yes	20.46	PF07268.11	Exported protein precursor (EppA/BapA)	5.7e-06
WP_013190203	Trichormus Nostoc azollae 0708	Trichormus	1	WP_013190203_1	1	MASIKLSQLQATGSELFQDSESFLNEMSDVSSIYGGGYDNDVSDISTLEKLAEAFVNVYGIGHIAYLAKSYSYSNGY	1663	yes	38.14	none	none	none
WP_013321440	Gloeothece verrucosa PCC 7822	Gloeothece	1	WP_013321440_1	1	MADIKINDIKPAGAELFEDSEGFLNELKDDEVNKVVGGVGTVIGRCCSNTAWTIIGKCGNA	400	yes	27.16	NF000539.0	plantaricin: plantaricin C family lantibiotic	8.9e-06
WP_015078657	Anabaena sp. 90	Anabaena	1	WP_015078657_2	2	MATITLSQLNTTGSELFADSESYLNELNDAASVSINGGGSDFSGFSAYGDFGVKYLEFLVDGYAIASIKHIAKSFSNDSHYGH	1640	yes	38.76	none	none	none
WP_015078657	Anabaena sp. 90	Anabaena	1	WP_015078657_10	10	MANIRISNLENTDEKKFIINLSNLDAVYVFGGEYNNASQILNYGVKALEFVLVIYAIDAISLLTKTFRK	1274	yes	24.96	PF13418.6	Galactose oxidase, central domain	1.1e-05
WP_015113151	Nostoc sp. PCC 7107	Nostoc	1	WP_015113151_3	3	MANITLSALNAAGSQLFQDSESFLNDLSDVDAIATHGAENNSNSYVSDFYGFNKLIEGYVGVYAIQHIYGIAKSFSQGGYGVSGY	2353	yes	32.34	none	none	none
WP_015113151	Nostoc sp. PCC 7107	Nostoc	1	WP_015113151_4	4	MANITLSELNIAGSQLFQDSESFLNDLSDVDLSAAHGGNNANYADYGYGSDSYISVFNKLIEGFVVVYAIQHIFSIAKSFSKYNY	1896	yes	26.15	none	none	none
WP_015113151	Nostoc sp. PCC 7107	Nostoc	1	WP_015113151_1	1	MANITLSELNAAGSQLFQGSESFLNDLSDVDAIAGGSGYGYGYDGFGFNKLIEGFVDVYAIQHVYGIAKSFSKGGYGVSGY	2746	yes	38.87	none	none	none
WP_015113151	Nostoc sp. PCC 7107	Nostoc	1	WP_015113151_6	6	MAKIIIDELSFSDLESYLTEVNDLDSLSIYGGESELQQILDFAYNLLNFVLSAYAIYNISLITKSFKITRNKTTRSVFSLF	1537	yes	24.75	none	none	none
WP_015113151	Nostoc sp. PCC 7107	Nostoc	1	WP_015113151_2	2	MARITISDLYLNNNEQHITELTAWEARTVEAGASTITIDTSDLLKLQQNINDILQGVSNQLRQQQQQQQQPNNSYGLRQPYDNYVYY	3621	yes	33.57	PF08278.11	DNA primase DnaG DnaB-binding	2.6e-06
WP_015127932	Calothrix sp. PCC 7507	Calothrix	1	WP_015127932_4	4	MAIIALSELHTTGSELFQDSESFLNDLNNTDSISVYGGTSDVSDTADGVTPILEYGIKGQEFGLLAFGANLTAHILKSFSEGGTFY	1944	yes	38.65	none	none	none
WP_015127932	Calothrix sp. PCC 7507	Calothrix	1	WP_015127932_3	3	MATIALSELHTTGSELFQDSESFLNDLNNTDSISVYGGNSDVSDTADGVTPILEYGIKGQEFGLLAFGANLTAHIVKSFSEGGSFY	2326	yes	39.07	none	none	none
WP_015127932	Calothrix sp. PCC 7507	Calothrix	1	WP_015127932_1	1	MATIALSELHTTGSELFQDSESFLNDLNNMDSISVYGGGSGGDVSDTADGVTPILEYGIKGQEFGLLAFGANLTAHIVKSFSEGGSFY	2703	yes	44.01	none	none	none
WP_015127932	Calothrix sp. PCC 7507	Calothrix	1	WP_015127932_2	2	MATIALSELYTTGSELFQDSESFLNDLNNMDSISVYGGGSGGDVSSAAEGVEPLLEYGIKGQEFGLLAFGANLTAHIVKSFSENGTFY	3086	yes	42.73	none	none	none
WP_015127932	Calothrix sp. PCC 7507	Calothrix	1	WP_015127932_7	7	MENITISDLQTADSKDFLLDLNNLDSMFVYGGENYGFMPILNYGLKSLEFGLIAYAIYSITLLVSSFNNQQYISGQSNSLYQTFTFY	1428	yes	20.01	none	none	none
WP_015139846	Nostoc sp. PCC 7524	Nostoc	1	WP_015139846_1	1	MASINLTELQATGSDLFQDSESFLQEMTSLEDSIYGGYDGGYSRSTDNIVAFTVKAFEFGIITFGIDAIVHLSKSFSDYNSQA	1626	yes	33.76	none	none	none
WP_015155263	Cyanosarcina cf. burmensis CCALA 770	Cyanosarcina	1	WP_015155263_1	1	MANITISELRPAGFDLFQDSESFLNDLTDTDSMSVLGGSEKGYNDSQYAYHAIVDIAVIHHLSFIAELVGNLASNVGGGNGGGK	1777	yes	34.63	none	none	none
WP_015155263	Cyanosarcina cf. burmensis CCALA 770	Cyanosarcina	1	WP_015155263_3	3	MANITISELRPAGFDLFQDSESFLNDLTDTDSMSVLGGSENGFNDSQYAYHAIVDIAVIHHLSFIAELVGSLASNVGGGGGNGGGK	2267	yes	29.16	none	none	none
WP_015155263	Cyanosarcina cf. burmensis CCALA 770	Cyanosarcina	1	WP_015155263_2	2	MARITILELSFEDSQLSRNSNSFLNDLTAGEIEAVVGGSVAASVLANIEDLVTDFDAQMEQLFDSWGQQFSTNTGSSSSTNTTPTSDNGSRRSRVYGTYGAYS	3172	yes	33.18	none	none	none
WP_015155263	Cyanosarcina cf. burmensis CCALA 770	Cyanosarcina	1	WP_015155263_4	4	MARIKISDLQPAESESFFTELTDADLAIRSGSANELNQLLSAVLIVYAISQIVSLVQSFSSTNQNSGTPLNNILSNIQGNNEL	1231	yes	22.61	PF12430.8	Abscisic acid G-protein coupled receptor	1.6e-06
WP_015157989	Chamaesiphon minutus PCC 6605	Chamaesiphon	1	WP_015157989_1	1	MASISISNLNPAGSDLLADSESFLTELQANDSSQIFGGSGYGGSKKSSKKSSKKSSKKRSKKGSKKGSKGYCFPCVPVYPCH	1816	yes	27.83	none	none	none
WP_015189896	Gloeocapsa sp. PCC 7428	Gloeocapsa	1	WP_015189896_3	3	MASIKIFELTPAGAELFQDNESFLNELNDQESLMISGGGGSDVNISVISQNSVSIGISIKTVSVVSQVKSYVFKKK	2075	yes	27.72	NF000539.0	plantaricin: plantaricin C family lantibiotic	1.1e-06
WP_015189896	Gloeocapsa sp. PCC 7428	Gloeocapsa	1	WP_015189896_1	1	MASIKISELKPLGNELFQDEESFLDELNERETLFITGGKKNEANLDISVLTVLTESIGISLQTVSIVTQIKKIKIKIKQ	1246	yes	38.12	none	none	none
WP_015189896	Gloeocapsa sp. PCC 7428	Gloeocapsa	1	WP_015189896_2	2	MSCLKISDLSPTGLELFQDAENFLNELSDREIENITGGFFSFFTDEFLPIPSDLVLKTVVKTRVVSVVTKSVQVKTKGIKTFGVSHTHKTIVTIKR	1858	yes	36	NF000539.0	plantaricin: plantaricin C family lantibiotic	1.6e-05
WP_015193424	Stanieria cyanosphaera PCC 7437	Stanieria	1	WP_015193424_5	5	MTNIRLSELHPVGSELFQDSESFLNELNTEELGEILGGGSIVTHVTQFSVSKGHITKSVGVSGVYKLTSKASISGANISYGNNISVIKTLLS	1586	yes	37.6	NF000539.0	plantaricin: plantaricin C family lantibiotic	3.2e-05
WP_015193424	Stanieria cyanosphaera PCC 7437	Stanieria	1	WP_015193424_3	3	MANIKLSELNPVGSELFQDSENFLNELNDQEMDAVMGAATVNTVASQSIGTQASQATVSGGNISVSNGVSVVATLTIG	2710	yes	43.78	PF04604.13	Type-A lantibiotic	2.7e-07
WP_015193424	Stanieria cyanosphaera PCC 7437	Stanieria	1	WP_015193424_4	4	MGNIKLSELCPAGSEFFQDSESFLKDLNEQEVSVIVGGEGLVTGIVTQIISQANGSIASQASISGGQITVSVGATVVGYF	1993	yes	42.12	none	none	none
WP_015194417	Stanieria cyanosphaera PCC 7437	Stanieria	1	WP_015194417_3	3	MANIQISELSPLGTALFADNESLMGSIRDLTEDELKITGGSGKGSGSKKSGSKKSKSKKSKSKKSKKSGSCGCGYGC	1603	yes	24.03	PF06375.11	AP-3 complex subunit delta-1	5e-05
WP_015197629	Calothrix sp. PCC 6303	Calothrix	1	WP_015197629_3	3	MSNIKIAELVPVGSDLFTDSESFLNELTSDQIMDTNGGGYLASLVNSFISINSQINSLFSANSNSINANTVGNVNTRVR	2297	yes	27.98	none	none	none
WP_015197629	Calothrix sp. PCC 6303	Calothrix	1	WP_015197629_1	1	MASIKISELRPSGSELFQDSESFLNELNTQEMEIVGGRAYFFSKAGGFGSIAVSISALSANGNTVNANTLGNANTVIL	2762	yes	41.26	none	none	none
WP_015197629	Calothrix sp. PCC 6303	Calothrix	1	WP_015197629_2	2	MLKLYDLLVPGFDLLQDSETFLTDLTDNELNSIQAGFLETLFFDCGQLVILGDENLINANINGQTVNALTQNNVNTSI	1681	yes	32.77	NF033222.1	listolys_S: listeriolysin S family toxin	2.9e-05
WP_015198131	Calothrix sp. PCC 6303	Calothrix	1	WP_015198131_3	3	MANIKLNDLSKMNLSGVDLFDDSESFLTELNDENEQINIVGGSCKFLTFGQQTPPPWTCPQVCCHDSEQSIQ	4435	yes	16.16	none	none	none
WP_015207763	Cylindrospermum stagnale PCC 7417	Cylindrospermum	1	WP_015207763_4	4	MANIKVNDIKPAGAELFTDSESFFDELNESDLNKLIGGLNSTFAYTCTGAAGCRRQPLRR	1374	yes	18.54	NF000539.0	plantaricin: plantaricin C family lantibiotic	4.1e-06
WP_015207763	Cylindrospermum stagnale PCC 7417	Cylindrospermum	1	WP_015207763_1	1	MANIKLNDIKPAGAELFTDAESFLNELNETDINKIIGGGSTYARTCTGARTCATKQLPEFYLAG	2206	yes	25.21	PF00186.19	Dihydrofolate reductase	3.3e-05
WP_015207763	Cylindrospermum stagnale PCC 7417	Cylindrospermum	1	WP_015207763_3	3	MAKLRINELKTAGSELFEDSETFLDELNNDELVNALGGFGYFSPNGGFITGRVQIDRRTTRTIIGGDILTTRIPTVRTRTPVTL	3201	no	20.33	none	none	none
WP_015207763	Cylindrospermum stagnale PCC 7417	Cylindrospermum	1	WP_015207763_6	6	MGVNQMANLKIDELQSAGTELFEDSESFLNELNSNELANAVGGYGYGRRRHGGYGHGGHRHGGYGYGRRW	4058	no	14.88	PF00402.18	Calponin family repeat	0.013
WP_015207763	Cylindrospermum stagnale PCC 7417	Cylindrospermum	1	WP_015207763_5	5	MGVTEMAKLKINELKAAGTELFEDSETFLDELSNDELENAIGGRRIYPTGGRPTIVGTPGKITPGCPFTRRTFGGLTTRYSPVVL	140	no	18.04	PF04604.13	Type-A lantibiotic	1.9e-06
WP_015207767	Cylindrospermum stagnale PCC 7417	Cylindrospermum	1	WP_015207767_4	4	MANIKVNDIKPAGAELFTDSESFFDELNESDLNKLIGGLNSTFAYTCTGAAGCRRQPLRR	1301	yes	18.54	NF000539.0	plantaricin: plantaricin C family lantibiotic	4.1e-06
WP_015207767	Cylindrospermum stagnale PCC 7417	Cylindrospermum	1	WP_015207767_6	6	MGVNQMANLKIDELQSAGTELFEDSESFLNELNSNELANAVGGYGYGRRRHGGYGHGGHRHGGYGYGRRW	7977	no	14.88	PF00402.18	Calponin family repeat	0.013
WP_015207767	Cylindrospermum stagnale PCC 7417	Cylindrospermum	1	WP_015207767_1	1	MANIKLNDIKPAGAELFTDAESFLNELNETDINKIIGGGSTYARTCTGARTCATKQLPEFYLAG	457	yes	25.21	PF00186.19	Dihydrofolate reductase	3.3e-05
WP_015207767	Cylindrospermum stagnale PCC 7417	Cylindrospermum	1	WP_015207767_3	3	MAKLRINELKTAGSELFEDSETFLDELNNDELVNALGGFGYFSPNGGFITGRVQIDRRTTRTIIGGDILTTRIPTVRTRTPVTL	7120	no	20.33	none	none	none
WP_015207767	Cylindrospermum stagnale PCC 7417	Cylindrospermum	1	WP_015207767_5	5	MGVTEMAKLKINELKAAGTELFEDSETFLDELSNDELENAIGGRRIYPTGGRPTIVGTPGKITPGCPFTRRTFGGLTTRYSPVVL	4059	no	18.04	PF04604.13	Type-A lantibiotic	1.9e-06
WP_015210601	Cylindrospermum stagnale PCC 7417	Cylindrospermum	1	WP_015210601_2	2	MATIKLSELQIAGSELFQDSESFINELNDVASVSVHGGGHDSGFSDYGHFGADFGKKYLEYLVNGYAVSTIKEIAKSYSESDDSYSNGYY	2031	yes	26.5	none	none	none
WP_015210601	Cylindrospermum stagnale PCC 7417	Cylindrospermum	1	WP_015210601_6	6	MAKITISALHPADSETFIYDLKDIDSQSIFGGRDDVFSPALDFGAKFFEFVISIYAIDTISLLAKSFNTTK	1601	yes	13.09	none	none	none
WP_015212417	Anabaena cylindrica PCC 7122	Anabaena	1	WP_015212417_6	6	MARIIIADLHPIDSEAFLNELTNQNSQTVFGGQDDYRPQILDFGVKAFEFVLVIAAIDAISFLTNSFINKDST	1630	yes	28	none	none	none
WP_015212417	Anabaena cylindrica PCC 7122	Anabaena	1	WP_015212417_2	2	MASIKLSELQATGSELFQDSESFLNEMSDVNSIYGGYYGGEVSDISTLTKLAEAFVNVYGIGHIAYLAKSYSDKSYGY	2896	yes	35.53	PF01434.18	Peptidase family M41	6.8e-06
WP_015212417	Anabaena cylindrica PCC 7122	Anabaena	1	WP_015212417_1	1	MASIKLSELQATGSELFQDSESFLNEMSDVNSIYGGSYGGEVSDISTLTKLAEAFVNVYGIGHIAYLAKSYSDKGYGY	2291	yes	36.68	PF01434.18	Peptidase family M41	8.3e-06
WP_015212417	Anabaena cylindrica PCC 7122	Anabaena	1	WP_015212417_3	3	MASIKLSELQATGSELFQDSESFLNEMSDVNSIYGGSYGSNVSDMSTFTKLAEAFVNVYGIGHIAYLAKSYSDNGYGY	1994	yes	33.28	none	none	none
WP_015212417	Anabaena cylindrica PCC 7122	Anabaena	1	WP_015212417_4	4	MASIXLSELQVTGSELFQDSESFLNEMSDVNSIYGGYYGGEVSDISTLTKLAEAFVNVYGIGHIGLLS	2619	yes	31.67	PF01434.18	Peptidase family M41	3.8e-06
WP_015216084	Anabaena cylindrica PCC 7122	Anabaena	1	WP_015216084_5	5	MASIKISDLRPSGLDLFVDSESFLNDLNDSDLATTNGGATPTTVTLLGAAWLGYSIGKELARFF	2238	yes	31.44	none	none	none
WP_015216084	Anabaena cylindrica PCC 7122	Anabaena	1	WP_015216084_4	4	MASIKISDLRPSGLDLFVDSESFLNDLNDSDLAATNGGATPAGVALLGAAWLGYSIGKELARFF	2808	yes	34.51	none	none	none
WP_015216084	Anabaena cylindrica PCC 7122	Anabaena	1	WP_015216084_8	8	MAVIAINDLRPTGAELFFGSESFMTDLNDNELGNVNGGITPSWYFAAVGVTALVGYLANRK	1990	yes	29.56	NF000539.0	plantaricin: plantaricin C family lantibiotic	2.4e-06
WP_015216084	Anabaena cylindrica PCC 7122	Anabaena	1	WP_015216084_6	6	MAVIAINDLRPTGAELFFGSESFMADLNDNELGNVNGGITPSWYFAAVGVTALVGYLANR	1411	yes	30.69	NF000539.0	plantaricin: plantaricin C family lantibiotic	3.2e-06
WP_015216084	Anabaena cylindrica PCC 7122	Anabaena	1	WP_015216084_7	7	MAVIAINDLRPTGAELFFGSESFMADLNDNELGNVNGGITPSWYFAAVGVTALVGYLAN	2566	yes	30.3	NF000539.0	plantaricin: plantaricin C family lantibiotic	3.9e-06
WP_015216084	Anabaena cylindrica PCC 7122	Anabaena	1	WP_015216084_12	12	MSKLKVSDLNPPGFQLFQDSETFLIDLNDDDLYIAGGGISITTRISVIQIPASEDIYQPSISFIW	2836	no	12.29	none	none	none
WP_015216084	Anabaena cylindrica PCC 7122	Anabaena	1	WP_015216084_10	10	MSSIKISDLRPAGFDLFVDSESFLNESFLNDLSDSDLAITHGGSTPTTVLLIGAGWLGYNVGKELARFF	1656	yes	22.61	none	none	none
WP_015659226	Streptomyces davaonensis JCM 4913	Streptomyces	1	WP_015659226_4	4	MNTAEQLIAGYAAYTNAEEFGASAGPDAPAITITTVSSPECVYFSLSAVSGSIATTKSWGC	529	yes	40.11	none	none	none
WP_015659226	Streptomyces davaonensis JCM 4913	Streptomyces	1	WP_015659226_2	2	MNTAEQLIAGYTAYTNAEEFGAGATAENPAITPTLLSFIGGSSGGCGGAVSAISGASVAGTVNWGC	814	yes	52.19	PF01425.21	Amidase	3.6e-06
WP_016570561	Streptomyces albulus	Streptomyces	1	WP_016570561_1	1	MKTTAIMELVAGYEVYADSAELQVDAAVDAPASTPACAAATLSWIVSQFSGKTVKDGC	330	yes	38.66	PF13701.6	Transposase DDE domain group 1	1.5e-06
WP_016570561	Streptomyces albulus	Streptomyces	1	WP_016570561_2	2	MDNKSTVITDLVAGYSTYTEAGELNVSAAAGAPATTYICASVAISRVSSPRCAASASAVSGATYEWTC	66	yes	35.62	none	none	none
WP_016864763	Fischerella muscicola CCMEE 5323	Fischerella	1	WP_016864763_1	1	MSTIQVTDLKPAGFGLFSDSESFLTELSGEEIGSISGGATPYVIIGFIARSSGACGELIGAAIGAAYTYYLSQRSN	1620	yes	37.65	PF08566.10	Mitochondrial import protein Pam17	1.2e-05
WP_016864763	Fischerella muscicola CCMEE 5323	Fischerella	1	WP_016864763_2	2	MSSIAISDLDLTGISLFVDRESYLDEVTSEDFDSIHGGSSPVCAFAAASSAECAAFAIGVVRSAVMVLSAYGAYRAISNASK	1322	yes	33.91	none	none	none
WP_016864763	Fischerella muscicola CCMEE 5323	Fischerella	1	WP_016864763_4	4	MSTIKVSDLSHIGLELFSDSENYMLELDNNEFDNIAGGFQNGCFPDTFTNPPKPYPLSKLDSKTYPGSFDPIY	1940	yes	24.53	none	none	none
WP_016950446	Anabaena sp. PCC 7108	Anabaena	1	WP_016950446_1	1	MANIQLSELQATGSELFQDSESFLNEMSDVNSIFGGGYHGGYVSDVSTLTKLAEAFVNVYAVGHIAYLAKSYSHSNGYSNGYGY	2026	yes	38.8	none	none	none
WP_016950446	Anabaena sp. PCC 7108	Anabaena	1	WP_016950446_6	6	MARIIIADLHPLDSEVFINELTSTDSQSVFGGQDNYRPQVLEVGAKALEFVLVIAAIDAISFLTSSFINRK	1369	yes	27.46	none	none	none
WP_016950446	Anabaena sp. PCC 7108	Anabaena	1	WP_016950446_2	2	MASIKLSELQATGSELFQDSESFLNEMTDVNSIYGGSYGSHVSDMSTFGKLAEAFVNVYAVGHIAYLAKSYSHSNGYSNGYGY	2334	yes	36.89	none	none	none
WP_016950446	Anabaena sp. PCC 7108	Anabaena	1	WP_016950446_3	3	MANIQLSELQVTGSELFQDSESFLNEMNDVNSVYGGSYSNHFSDNSTLVKLAEAFVNVYAVGHIAYLAKSYSHSNSYGY	1733	yes	34.49	none	none	none
WP_017198207	Arthrobacter sp. M2012083	Arthrobacter	1	WP_017198207_2	2	METQELMSLVSGYSTYAAADELSFTAESSEPASTPICGFLASFAFSYITSGGPGR	60	yes	10.55	none	none	none
WP_017198207	Arthrobacter sp. M2012083	Arthrobacter	1	WP_017198207_3	3	MNAQSQATGNLMELVSGYKQYAAADELEFTADSDAPAATPTLALWSIATSKLFVSGAVSGAGAGVSWRLGC	531	yes	10.4	PF16934.5	Two-component Enterococcus faecalis cytolysin (EFC)	1.1e-05
WP_017198207	Arthrobacter sp. M2012083	Arthrobacter	1	WP_017198207_5	5	METKELMSLVSGYSTYAAADEISFTAEGDTPASSPLCGFLASFAFSYFTSTGGPPKR	293	yes	8.2	none	none	none
WP_017314970	Mastigocladopsis repens PCC 10914	Mastigocladopsis	1	WP_017314970_3	3	MANIKISELRPAGAELFQDSESFLNELNDQEMSVFGGGDGDVVVTIDSNVDSVDIKTKDISVSIG	1643	yes	33.68	NF000539.0	plantaricin: plantaricin C family lantibiotic	3.7e-06
WP_017314970	Mastigocladopsis repens PCC 10914	Mastigocladopsis	1	WP_017314970_1	1	MANIKISELRPAGAELFQDSESFLNELNDQEMSVFGGGDGDVVVTVDSNVDSVDIKTQDISVSIG	2396	yes	35.08	NF000539.0	plantaricin: plantaricin C family lantibiotic	2.1e-06
WP_017314970	Mastigocladopsis repens PCC 10914	Mastigocladopsis	1	WP_017314970_4	4	MANIKISELRPAGAELFQDSESFLNELNDQEMSVFGGGDGDVVVTVDSNVDSVDIKTKDISVSIG	1894	yes	32.86	NF000539.0	plantaricin: plantaricin C family lantibiotic	1.8e-06
WP_017314970	Mastigocladopsis repens PCC 10914	Mastigocladopsis	1	WP_017314970_2	2	MANIKISELRPAGAELFQDSESFLNELNDQEMSVFGGGDGDVVVTVDSNVDTLDIKTKDISVSIG	2145	yes	34.8	NF000539.0	plantaricin: plantaricin C family lantibiotic	1.8e-06
WP_017318973	Mastigocladopsis repens PCC 10914	Mastigocladopsis	1	WP_017318973_1	1	MVHPSIQFRSPSYAYGDVIPLHPARRALTFLLGGKQMANIEINNLHPAGSELFHDSESFLNELTEREMWGVEGGLTLDTLGSVLSESLGQTLGQGSIVVTGPDSIQGLTL	2009	yes	23.91	none	none	none
WP_017318973	Mastigocladopsis repens PCC 10914	Mastigocladopsis	1	WP_017318973_3	3	MANIKLNDLRPVGSDFFADNESYLNELTDNELGVTGGIITLDSVASLASALSIPTALTSEVSSALTSVIGG	2674	yes	20.94	PF18612.1	Bacterial Alpha amylase C-terminal domain	8.8e-06
WP_017318973	Mastigocladopsis repens PCC 10914	Mastigocladopsis	1	WP_017318973_2	2	MTESLLVGGKQMANIKISELRPAGAELFQDSESFLNELTEREMWGVEGGLTLDTLSATLADTVSEPLSGVTGGSLGLSIASL	2409	yes	21.41	PF15222.6	Kidney androgen-regulated	1.9e-05
WP_017581465	Nocardiopsis valliformis DSM 45023	Nocardiopsis	1	WP_017581465_2	2	MGEQNPFEGVDTYTDPAEITEDHGVEDPEASPASVASAIGSFNASVALTNTFGC	68	yes	48.54	none	none	none
WP_017581465	Nocardiopsis valliformis DSM 45023	Nocardiopsis	1	WP_017581465_3	3	MAEKTPFDGADNYTDPAEITEDHGVEDPEATPSVVVSIAASASAVSGGGVTATRHFGC	752	yes	45.19	none	none	none
WP_017581465	Nocardiopsis valliformis DSM 45023	Nocardiopsis	1	WP_017581465_1	1	MGTESLMNGADNYTDPAEITEDQDVEEPGVVVTTVVPGPITLLPVSVTTTVRIGC	496	yes	48.64	none	none	none
WP_017581465	Nocardiopsis valliformis DSM 45023	Nocardiopsis	1	WP_017581465_4	4	MSEKTPFDGADNYTDPAEITEDQEIENPEVTPASVAASVSVVIATNRFGC	297	yes	44.02	none	none	none
WP_017585895	Nocardiopsis ganjiahuensis DSM 45031	Nocardiopsis	1	WP_017585895_2	2	MGEKTPFEGVDNYTDPAEITKDQDVEEPEATPASIALSVGSIVATQHWGC	68	yes	43.43	none	none	none
WP_017585895	Nocardiopsis ganjiahuensis DSM 45031	Nocardiopsis	1	WP_017585895_1	1	MSTETLMNGADNYTDPAEITKDQDVEEPGVVVTTVVPGPITITIPPISVTATVRIGC	246	yes	49.29	none	none	none
WP_017585895	Nocardiopsis ganjiahuensis DSM 45031	Nocardiopsis	1	WP_017585895_3	3	MAEKTPFEGVDNYTDPAEITKDQDVEEPEATPASIALSVGSIVATQHWGC	490	yes	42.32	none	none	none
WP_017617392	Nocardiopsis gilva YIM 90087	Nocardiopsis	1	WP_017617392_1	1	MSSQDLIGGFEAYTTSDEVSGALKEDLAPEAATWTTTTSSVPCTESVAATVVFKC	1215	yes	11.71	none	none	none
WP_017721129	Oscillatoria sp. PCC 10802	Oscillatoria	1	WP_017721129_1	1	MANITISDLRPAGSDLFADSESFMQELTEQEIGGVLGGDKIKIKTVVININIGILTIACPIGS	1582	yes	24.1	NF000539.0	plantaricin: plantaricin C family lantibiotic	1.4e-06
WP_017748579	Scytonema hofmannii PCC 7110	Scytonema	1	WP_017748579_3	3	MANIKISELRPAGSELFQDSESFLNELNEREMAGLEGGGYWFVSNGSVGVSITAQTVVGNTVNANTGGNVNTVILL	2409	yes	29.9	NF000539.0	plantaricin: plantaricin C family lantibiotic	2.5e-06
WP_017748579	Scytonema hofmannii PCC 7110	Scytonema	1	WP_017748579_2	2	MSAIKISDLRPAGHKLFEDSENYLHELTESEMMVVGGNRLRSIVVVELDNISVFAATVVTANANTINANTIGNTNSFVGG	1566	yes	32.57	PF11131.8	Rap-phr extracellular signalling	2.8e-05
WP_017748579	Scytonema hofmannii PCC 7110	Scytonema	1	WP_017748579_1	1	MASIKIVELRPAGSELFQDSESFLNELNERDMLGLEGGFAFNGTLGISITAQTVVGNTANANTFGNVNTVIAY	2110	yes	35.7	NF000539.0	plantaricin: plantaricin C family lantibiotic	1.2e-06
WP_017749323	Scytonema hofmannii PCC 7110	Scytonema	1	WP_017749323_2	2	MANIEIQNLQLAGSELFQDSESFLNEMSDSEIWSVQGGLTLDTLVFSLPDTISDPLAGASVGTASGITSGLTSGTIGGLSLTGPV	2162	yes	28.83	PF10439.9	Bacteriocin class II with double-glycine leader peptide	3.6e-08
WP_017749323	Scytonema hofmannii PCC 7110	Scytonema	1	WP_017749323_3	3	MSNIEIKNLQLAGSELFQDSESYLNEMSDREVWSVQGGLTLDTLVFTLPATISDPLAGATVGTLSMITGGTLAGLSLTGAV	1793	yes	22.86	PF10439.9	Bacteriocin class II with double-glycine leader peptide	4.3e-06
WP_017749323	Scytonema hofmannii PCC 7110	Scytonema	1	WP_017749323_1	1	MASIEINNLRPVGYDLFHDSESFINELSDREMWGLEGGILGALGGTLAGLGLQSLISGNSGFNVTGADSFNNLIDLGNLFGGRPKG	1414	yes	33.17	none	none	none
WP_018550639	Streptomyces sp. SID4913	Streptomyces	1	WP_018550639_1	1	MQNEQQGIDELLAGYSTYTDSEELVAAGAAPSVIATITLTNTETTILTPETSITTLPCYLA	1171	yes	61.3	none	none	none
WP_018960901	Streptomyces sp. CNB091	Streptomyces	1	WP_018960901_1	1	MQNVTEQDLFDGYTAYTSAEELGLHDGKDAAPAFSPTIPWAIRATIISARSSQQCAAALGSLAAKTVENKC	3179	yes	52.71	none	none	none
WP_019495762	Calothrix sp. PCC 7103	Calothrix	1	WP_019495762_1	1	MATIKISNLRPTGAELFSDSESYMNELGDSELVSVNGGLTSPLCIVTAIRVGYAAARSSQQCAIGIAGAIGGAGRWLENKRKN	1282	yes	28.09	PF10439.9	Bacteriocin class II with double-glycine leader peptide	5.2e-05
WP_019496925	Calothrix sp. PCC 7103	Calothrix	1	WP_019496925_1	1	MATISISNLRNSGAELFTDSESYLNELTDVELNETKGGSIIAGAAFIAGVIIGAAIAGRIAKEVC	1410	yes	28.52	PF02038.16	ATP1G1/PLM/MAT8 family	4.9e-05
WP_019496925	Calothrix sp. PCC 7103	Calothrix	1	WP_019496925_2	2	MATITISNLNLSGSELLIDTETYLHELTEAELDMTKGGYFYITSPIVYPTSIFTVKPVFPDIMQTIILR	710	yes	19.87	none	none	none
WP_019496925	Calothrix sp. PCC 7103	Calothrix	1	WP_019496925_3	3	MAAISISDLRISGADLFVDAETYLHELTDTELGMTKGGCFPIPTFRPTTNTITTITITSIVSKLV	449	yes	14.51	none	none	none
WP_019499235	Pseudanabaena sp. PCC 6802	Pseudanabaena	1	WP_019499235_3	3	MATIAISDLSTSGYTLFSDSESYMNDLSEPEIDIRGGELSPLIINAFSPLYLPRGEDLPPLLRSPINIA	1335	yes	30.51	none	none	none
WP_019499235	Pseudanabaena sp. PCC 6802	Pseudanabaena	1	WP_019499235_2	2	MANIDINELNAIGSDLFDDAETYLQDLSEGELRIQGGLDADCWPTKPTTVTSITQSTAIICSIGFPTTKPYSPLCAVTMG	2229	yes	33.03	none	none	none
WP_019499235	Pseudanabaena sp. PCC 6802	Pseudanabaena	1	WP_019499235_1	1	MATIKINELNPAGSNLFNDSESFMADLTDEQISSTRGGCLGGVVTITATPFSSSPVCGVVGGADLALSTVVVFTVIDSTKK	3009	yes	37.22	none	none	none
WP_019499235	Pseudanabaena sp. PCC 6802	Pseudanabaena	1	WP_019499235_4	4	MANIDISELNISGSDLFDDTETYLQELSEEELGIQGGIIDGCIPPLLPTPLTTDGMSTYVCSNCISITGSPLCVPPTANTAN	2566	yes	28.86	none	none	none
WP_019499235	Pseudanabaena sp. PCC 6802	Pseudanabaena	1	WP_019499235_5	5	MATIQINELNPAGSDLFNDLESFMSDLTDEQINSKRGGCVVSVASIPYRLNPYITALAICPASSTPVCALV	1756	yes	23.99	none	none	none
WP_019501037	Pseudanabaena sp. PCC 6802	Pseudanabaena	1	WP_019501037_2	2	MATINIQDLKVTGSNLFSDEESFLNELTSEELDITTGRFSPVVYTLAVGSAFVLSYNIGKISAEIYNKFW	1742	yes	22.78	none	none	none
WP_019501037	Pseudanabaena sp. PCC 6802	Pseudanabaena	1	WP_019501037_1	1	MATIAITELRPVGSALFSDSESFMDVLTESELGGVNGGLSPIVVYTVAINSWWFVGASAAGLSIGFWTNVK	2023	yes	23.27	PF10439.9	Bacteriocin class II with double-glycine leader peptide	1.7e-07
WP_019501955	Pseudanabaena sp. PCC 6802	Pseudanabaena	1	WP_019501955_4	4	MANIAISDLKLAGFDLFSDSESYMRDLSDTELNAQGGITPVLAASSEPCGMAVAFGAAALYDWLFG	5350	yes	28.56	none	none	none
WP_019501955	Pseudanabaena sp. PCC 6802	Pseudanabaena	1	WP_019501955_9	9	MANISISNLSPAGSDLFLDCESYLTDIADRDLDRVNGGLNTTCATLILTILAFTTIV	2577	yes	22.37	none	none	none
WP_019501955	Pseudanabaena sp. PCC 6802	Pseudanabaena	1	WP_019501955_12	12	MANISIPNLSPAGSDLFVDSESYMNDVSDRDLGHVAGGGSAIPPDTIPPVTLTTGDYNSTAIIE	6610	yes	17.35	none	none	none
WP_019501955	Pseudanabaena sp. PCC 6802	Pseudanabaena	1	WP_019501955_3	3	MANISISTLQPTGDESIDMLSVEEMEDIAGGNILIYGGPIVVGFAVGTAIRMGIDKLVSWLF	2852	yes	28.75	PF16934.5	Two-component Enterococcus faecalis cytolysin (EFC)	1.9e-05
WP_019501955	Pseudanabaena sp. PCC 6802	Pseudanabaena	1	WP_019501955_6	6	MSNIVVANLNHAGSDLFSDPENYMADVTDSELGHVSGGLWTPFMVISSFSTVTIGLLPL	4420	yes	24.42	none	none	none
WP_019501955	Pseudanabaena sp. PCC 6802	Pseudanabaena	1	WP_019501955_10	10	MANIDITSLHSTGLDLFSDDENFMCEISESSSAIINGGLVPVPITQEFPTTKFSPLCVPVTPFTPGLITPTPLPTTNVVL	3465	yes	19.54	none	none	none
WP_019501955	Pseudanabaena sp. PCC 6802	Pseudanabaena	1	WP_019501955_9007	9007	MANLAISNLCSNGSDLFSGSENFMSEISESDLAMVFGGKYTPPVKTPPEPVPFPEPIPTPPIVITTKAY	8846	yes	14.83	NF000539.0	plantaricin: plantaricin C family lantibiotic	1.2e-06
WP_019501955	Pseudanabaena sp. PCC 6802	Pseudanabaena	1	WP_019501955_13	13	MSNLLIPNLSSNGSDLFSGNENFMSEISESDLAMVFGGKFTPPVKTPPEPGPFPEPIPTSPIVITTRA	6819	yes	17.03	NF000539.0	plantaricin: plantaricin C family lantibiotic	1.6e-06
WP_019505167	Pleurocapsa sp. PCC 7319	Pleurocapsa	1	WP_019505167_2	2	MANINIENISDLALNGNDLFEDSESFITELDDNEQAIMGGCAVTNIGDCGNTVGDCRVTINIT	3810	yes	28.99	none	none	none
WP_019505167	Pleurocapsa sp. PCC 7319	Pleurocapsa	1	WP_019505167_4	4	MPNINIDNISDLDLNGNDLFEDSESFITELSDDNEQAIIGGCLFTGGCLFTDGCGLTRIGGCGNTIGQCGNTIVINISI	5502	yes	24.79	PF07016.11	Cysteine-rich acidic integral membrane protein precursor	6.7e-06
WP_019505167	Pleurocapsa sp. PCC 7319	Pleurocapsa	1	WP_019505167_1	1	MTNINIDNISDLDLNGNDLFEDSESFITELSDGNEQAIIGGCVLTPIGDCVHTQGCGNTMICPAISWALS	6134	yes	29.51	PF01513.21	ATP-NAD kinase	3.6e-07
WP_019505167	Pleurocapsa sp. PCC 7319	Pleurocapsa	1	WP_019505167_3	3	MANINIENISDLALNGNDLFEDSESFITELDDNEQAIMGGCAVTNIGNCDNTVGDCRVTINIT	6978	yes	28.96	none	none	none
WP_020390834	Kribbella catacumbae DSM 19601	Kribbella	1	WP_020390834_2	2	MENSGELSLMGGVVEYTTPAEVLAEDASDAPEFTPTIAVTFLVAC	5631	yes	17.43	none	none	none
WP_020390834	Kribbella catacumbae DSM 19601	Kribbella	1	WP_020390834_1	1	MENSGELSLMGGVVEYTTPAEVLAEGASDAPEVVTTTTTIVTATILLAC	5295	yes	21.43	none	none	none
WP_022929317	Patulibacter americanus DSM 16676	Patulibacter	1	WP_022929317_2	2	MHAEHRFDDLLSGLTAYTSAEELTKDVAAADGYDAAAVSPATPATPSSWPCVQASASLVSSSITGTWAVGC	2170	yes	45.32	none	none	none
WP_026100063	Fortiea contorta PCC 7126	Fortiea	1	WP_026100063_6	6	MASITVNELHTTGVELFQDSESYLTELNNLDAVHGGTDPAANSEYNGVTATVFSLIEKGYEFGIYTLGIDAIAAIIKSFSQPAAK	1887	yes	43.93	none	none	none
WP_026100063	Fortiea contorta PCC 7126	Fortiea	1	WP_026100063_2	2	MAFIAVNELRATGAELFQDSESYLTELNNLDAVHGGIDAGATASAGATATILGLVTKGYEFGVYTVGIEGISKLVKSFSYGGGYSGAV	2289	yes	48.31	none	none	none
WP_026100063	Fortiea contorta PCC 7126	Fortiea	1	WP_026100063_4	4	MAFIAVNELRATGAELFQDSESYLTELNNLDAVHGGIDAGATATILGLVTKGYEFGVYTVGIEGISKLVKSFSNGGGYSGAV	3513	yes	45.32	none	none	none
WP_026100063	Fortiea contorta PCC 7126	Fortiea	1	WP_026100063_3	3	MAFIALNELHTTGAGLFQDSESYLTELNNLDDAVHGGLLAGAATTASAGATATILGIVTKGYEFGVYTVGIEGISYLVKSFSYGGGYSSAV	3905	yes	46.56	none	none	none
WP_026100063	Fortiea contorta PCC 7126	Fortiea	1	WP_026100063_5	5	MAFIAINELRATGAELFQDSESYLTELNTLDAIHGGTNASASVGATATILGLVTKGYEFGVYTVGIEGISKLVKSFSYGGGYSGAV	3109	yes	44.53	none	none	none
WP_026100063	Fortiea contorta PCC 7126	Fortiea	1	WP_026100063_1	1	MAFIAVNELRATGAELFQDSESYLTELNNLDAVHGGIDAGATASAGATATILGLVTKGYEFGVYTVGIEGIAHLVKSFSNGGGYSGAV	2699	yes	50.85	none	none	none
WP_026100063	Fortiea contorta PCC 7126	Fortiea	1	WP_026100063_7	7	MASIAVHELHTTGIELFKNSESYLTELNHLDEVYGGQYVDISYTTSYGYSQGITAIFLPVVKGYEFAIYAFALEAIVEIVKLYSISNTLYKLTSNSWMNLGITQ	1427	yes	43.12	none	none	none
WP_027402982	Aphanizomenon flos-aquae NIES-81	Aphanizomenon	1	WP_027402982_2	2	MASIKLSQLQANGSELFQDSESFLNEMNDVDTISIQGGSGSGIHDLVHYSIKGKEFVLLGFAIDSAVSLAKSFSHSHSHSNHYSN	2145	yes	39.76	none	none	none
WP_027402982	Aphanizomenon flos-aquae NIES-81	Aphanizomenon	1	WP_027402982_6	6	MASIXXXXXXXXXXXXXXXXXXXXXXXXXXXXXXXXXXXXXXXXXXXXHDLVYYSIKGKEFVLLGFAIDNVVSLAKSFSHSDHYSHL	1695	yes	22.47	none	none	none
WP_027402982	Aphanizomenon flos-aquae NIES-81	Aphanizomenon	1	WP_027402982_8	8	MARITISDLNTTQEKLLIHEISSIESVYIVGGNRGNFHELVKFGIKSMEFILLAYAIDSISYLGSSFNGNY	1256	yes	11.03	none	none	none
WP_027843178	Mastigocoleus testarum BC008	Mastigocoleus	1	WP_027843178_3	3	MANIKVKEIQPAGIELFGDSESFMNELSGNELNNVIGGRTNTHAYTCTGARTCAKTK	1690	yes	19.47	NF000539.0	plantaricin: plantaricin C family lantibiotic	9.3e-07
WP_027843178	Mastigocoleus testarum BC008	Mastigocoleus	1	WP_027843178_2	2	MANIKVKEIQPAGIELFGDSESFMNELSGNELNNVIGGRTNTHAYTCTGARTCAKTK	1371	yes	19.47	NF000539.0	plantaricin: plantaricin C family lantibiotic	9.3e-07
WP_027843178	Mastigocoleus testarum BC008	Mastigocoleus	1	WP_027843178_1	1	MANIKVKEIQPAGIELFGDSESFMNELSGNELNNVIGGRTNTHAYTCTGARTCAKTK	2009	yes	19.73	NF000539.0	plantaricin: plantaricin C family lantibiotic	9.3e-07
WP_027845719	Mastigocoleus testarum BC008	Mastigocoleus	1	WP_027845719_3	3	MANIKVKEIQPAGIELFGDSESFMNELSGNELNNVIGGRTNTHAYTCTGARTCAKTK	731	yes	19.47	NF000539.0	plantaricin: plantaricin C family lantibiotic	9.3e-07
WP_027845719	Mastigocoleus testarum BC008	Mastigocoleus	1	WP_027845719_2	2	MANIKVKEIQPAGIELFGDSESFMNELSGNELNNVIGGRTNTHAYTCTGARTCAKTK	1050	yes	19.47	NF000539.0	plantaricin: plantaricin C family lantibiotic	9.3e-07
WP_027845719	Mastigocoleus testarum BC008	Mastigocoleus	1	WP_027845719_1	1	MANIKVKEIQPAGIELFGDSESFMNELSGNELNNVIGGRTNTHAYTCTGARTCAKTK	412	yes	19.73	NF000539.0	plantaricin: plantaricin C family lantibiotic	9.3e-07
WP_029630331	Tolypothrix [Scytonema hofmanni] UTEX 2349	Tolypothrix	1	WP_029630331_3	3	MATINISDLHPTGSDLFSDSESYINELGDGELDATYGGSTPIIWSVRVSVVLTIAAVTLFTGQGEAN	2161	yes	31.63	none	none	none
WP_029630331	Tolypothrix [Scytonema hofmanni] UTEX 2349	Tolypothrix	1	WP_029630331_1	1	MATINISDLHPAGSDLFSDSEGYMRDLVDSEFDGLYGGLPFLVWTVGYYAVRSSKWCVAGAAAGVAALGGIVGWNNA	1865	yes	34.95	PF16934.5	Two-component Enterococcus faecalis cytolysin (EFC)	1.7e-05
WP_029630331	Tolypothrix [Scytonema hofmanni] UTEX 2349	Tolypothrix	1	WP_029630331_2	2	MTTIRISNLNVSGLDLLSDEESYLNEINKEEFDWIHGGGSPVGVAVVAGIVGIFAGSVAVSKELKKFHDRRDGFTSFL	1440	yes	34.44	none	none	none
WP_030169499	Kitasatospora arboriphila	Kitasatospora	1	WP_030169499_4	4	MSEAVTKSLVAGYRSYAAAPELTEMSEAAPSATPGILSFIGTSSTACGTAVSVISSGGVGATITWGC	98	yes	25.1	none	none	none
WP_030169499	Kitasatospora arboriphila	Kitasatospora	1	WP_030169499_3	3	MTNSQSLISGYANYVRSEELAHVNAESAPGISPVSAFVSASSPECAAFSVGASAGVVTSTSITVGAGC	381	yes	28.94	none	none	none
WP_031017311	Streptomyces sp. NRRL WC-3795	Streptomyces	1	WP_031017311_2	2	MQTTQNEKDLFEGYTAYTSAEELGLYDGKDAAPAFSPTIPWAIRATIITARSSQQCAAALGSLTAKTIEKKC	2906	yes	62.61	none	none	none
WP_035150190	Calothrix sp. 336/3	Calothrix	1	WP_035150190_4	4	MAFIKISELRPAGSELFQDSESFLNELGEQEMAIAGGGYNNTVASVISQASISVGISILTKSVVSQNNDYRYSFFKK	3172	yes	33.55	NF000539.0	plantaricin: plantaricin C family lantibiotic	1.9e-06
WP_035150190	Calothrix sp. 336/3	Calothrix	1	WP_035150190_3	3	MSTIKISELYPVGSELFQDSESYLNELNDQEMLVMGGKKNKYKFVITSVIEVISQASVSNGFSLNTFSFVTGG	2846	yes	33.62	none	none	none
WP_035150190	Calothrix sp. 336/3	Calothrix	1	WP_035150190_2	2	MAFIQIAELPSAGSELFNDSESFLDELTEEGVNNIQGGEKSLIIFTLIKTNLSYPTLIYPTLLSRSLVESKYTYSVGISLETKSVIHKF	1913	yes	34.19	PF13087.6	AAA domain	2.3e-06
WP_035150190	Calothrix sp. 336/3	Calothrix	1	WP_035150190_1	1	MSIIRIVQLRPPGADLFDDNESFISELSEAESGDFLGGLIISQVTVSAGIVLTTKRVVWSKNYFRYTLRSGIKKSQFTITIKTQVI	1607	yes	38.59	PF15176.6	Leucine-rich repeat family 19 TM domain	9.1e-06
WP_035150190	Calothrix sp. 336/3	Calothrix	1	WP_035150190_5	5	MSHIKITNLHLSGKEFFDDSETFLNELTHQDITKIIGGEGEAIVSQVTYSIGMISADNNLFIPEVSIEFDTTSTESNLFLLS	2443	yes	30.74	PF04604.13	Type-A lantibiotic	1.8e-06
WP_038089561	Tolypothrix bouteillei VB521301	Tolypothrix	1	WP_038089561_2	2	MANIKVSDMNLAGSELFMDSESFLNDLTDMDVTSVQGGEGYGLGEFYGLNYKVLEAGLVGLGVTNVVSLVKSFSANGLGGIGTGGII	1743	yes	39.51	PF00164.25	Ribosomal protein S12/S23	1.2e-05
WP_038089561	Tolypothrix bouteillei VB521301	Tolypothrix	1	WP_038089561_1	1	MANIKVSDMNLAGSELFMDSESFLNDLTDMDVTSVQGGEGYGLGEFYGLNYKVLEAGLVGLGITNVVSLVKSFSANGLGGIGTGATTGATTAAGTGATTAGASTLQLTI	2091	yes	55.33	none	none	none
WP_038089561	Tolypothrix bouteillei VB521301	Tolypothrix	1	WP_038089561_4	4	MAKIIISDLRPADSEDSESFLHEITDIESTIVQGGVDYGLSQFLNFGVKTLEYALIGFAIYNIVSLVKLFMTSPRHRF	1344	yes	30.75	none	none	none
WP_038089561	Tolypothrix bouteillei VB521301	Tolypothrix	1	WP_038089561_5	5	MASITISHLHPIDNERLFDELTAREMRTVVGGALVFKLNNVSPKQLEILKLFSVFNNPDRDPITITLNTLDHPGNSY	2858	yes	24.53	none	none	none
WP_040022866	Streptomyces sp. 150FB	Streptomyces	1	WP_040022866_2	2	MNDIELATGFDTYADVIEMADEVTPDEAPSPQTIVSLSVVASIKWGC	349	yes	43.43	none	none	none
WP_044206131	Coleofasciculus chthonoplastes PCC 7420	Coleofasciculus	1	WP_044206131_2	2	MANIAISNLSPSGFDLFDDSESYLQELSEQELSFQGGVMITPTITTTITTTTLTPTITTTMTLPLRPR	2823	yes	22.28	PF11873.8	Membrane-bound lytic murein transglycosylase C, N-terminal domain	2.7e-05
WP_044206131	Coleofasciculus chthonoplastes PCC 7420	Coleofasciculus	1	WP_044206131_1	1	MPTIKVSDLKPEGYNLFSDSESYMKELSEDELGTGIYGGAISTPACAVVVLVAYTVSIIASAAQSKPKSPHRPG	2150	yes	23.3	PF16934.5	Two-component Enterococcus faecalis cytolysin (EFC)	6.7e-07
WP_044386376	Streptomyces cyaneogriseus subsp. noncyanogenus	Streptomyces	1	WP_044386376_2	2	MNDIELAAGFDAYADVNEMADEVTPDEAPSPQTIISVIVTASFDC	156	yes	32.57	none	none	none
WP_044449859	Mastigocladus laminosus UU774	Mastigocladus	1	WP_044449859_1	1	MANIKVSELSSAGYELFMDSESFLQDLADTDVMSVHGGQGDGFQKYLEYGVVGLGINNIASLAKSFTAA	1915	yes	35.6	none	none	none
WP_044449859	Mastigocladus laminosus UU774	Mastigocladus	1	WP_044449859_3	3	MASITISDLRPVSSEDSKSFLYDLLDTNSILVHGGTSYGISEYQKALEYALVGYAIHNIVSLVKIFLAPRNTSVSLSPK	1603	yes	27.12	none	none	none
WP_045870710	Fremyella diplosiphon NIES-3275	Fremyella	1	WP_045870710_1	1	MANIKVHDLMNLNLTGADLFSDSESFMKELSGEDEQIFGGAIPVICVTGTCRKSTIICPVSDQTIVYAV	3686	yes	19.59	none	none	none
WP_049802506	Gloeothece verrucosa PCC 7822	Gloeothece	1	WP_049802506_1	1	MADIKINDIKPAGAELFEDSEGFLNELKDDEVNKVVGGVGTVIGRCCSNTAWTIIGKCGNA	1263	yes	27.16	NF000539.0	plantaricin: plantaricin C family lantibiotic	8.9e-06
WP_049976882	Streptomyces leeuwenhoekii	Streptomyces	1	WP_049976882_1	1	MDTHELIEGFDAYVEAEELNEDAMVDAPATTVPCTVASFATGYFSC	31	yes	44.33	none	none	none
WP_051418997	Salinispora tropica CNH898	Salinispora	1	WP_051418997_1	1	MNAVLTGDDLLGGYTAYTSAVELDVTDGGAQAPAFSPAASPLVPILLRATLITARSSQNCAIAIARTTGGIARTIEIVC	3147	no	41.26	none	none	none
WP_051436687	Streptomyces sp. CNT371	Streptomyces	1	WP_051436687_2	2	MNATELMAGYTAYATAEDLSVSEVAEPGHTTQITTLDMPHTTQITTFAGE	138	yes	38.26	none	none	none
WP_051438280	Streptomyces sp. CNH099	Streptomyces	1	WP_051438280_1	1	MDIAELIEGYTAYTTPEDLSVSGVTEPGHTTQITTLDMPHTTQITTFAGD	136	yes	47.42	none	none	none
WP_051700182	Streptomyces sp. NRRL F-4474	Streptomyces	1	WP_051700182_4	4	MSHDQNTLEELVTGYESYADADEIEVDAVTGAPATTPFCGAAASFMLSYVTTNGPG	402	yes	47.9	PF14116.6	YyzF-like protein	7.3e-06
WP_051700182	Streptomyces sp. NRRL F-4474	Streptomyces	1	WP_051700182_2	2	MSNDQSMLEELVTGYESYADADEIEVDAVTGAPATTPFCGAVASFALSYVTTNGPG	631	yes	53.7	none	none	none
WP_051700182	Streptomyces sp. NRRL F-4474	Streptomyces	1	WP_051700182_1	1	MDNASMMDLVAGYNTYAEASELGIQAVADAPATTPVCAATVAASAVSSGWCASAAASAAGGATYKLGC	128	yes	55.92	PF16934.5	Two-component Enterococcus faecalis cytolysin (EFC)	3.1e-06
WP_051707308	Streptomyces sp. NRRL F-6676	Streptomyces	1	WP_051707308_3	3	MSTEDLMSGYSAYTTPAAAVEEYDQDRAEASWTLIPLTLVTITIIG	1711	no	32.52	none	none	none
WP_051707308	Streptomyces sp. NRRL F-6676	Streptomyces	1	WP_051707308_1	1	MQSADLMGGYAAYTSPRTAVEELATTRNQHDDAEASPWIVTTISLVVTILLPLTAS	1479	no	42	none	none	none
WP_051708270	Micromonospora parva	Micromonospora	1	WP_051708270_1	1	MQEKANNIEELLAGYETYSTAEDIDLSAVSDAPATTPGCAIVSAGVSWMSGQVVSKTIDDGC	356	yes	52.86	none	none	none
WP_051708270	Micromonospora parva	Micromonospora	1	WP_051708270_2	2	MNTDITKSDNIMELVSSYETYLEADDDLGVSAVADAPATTWYCASAAVSFLTAATYEATC	102	yes	43.5	none	none	none
WP_051715083	Streptomyces sp. NRRL S-475	Streptomyces	1	WP_051715083_4	4	MDAAELIEGYAMYVSPEEADSLQIPDLDVEGQSFVPTPVATTLIVHC	63	yes	26.91	none	none	none
WP_051817283	Kitasatospora sp. NRRL B-11411	Kitasatospora	1	WP_051817283_2	2	MQDDLFATDELLAGYSTYTAPEELVAAGAAPQIIGTITMTETGLTILTPETSVTSIPCYLA	1261	yes	50.8	none	none	none
WP_051837683	Streptomyces sp. NRRL F-2580	Streptomyces	1	WP_051837683_3	3	MDNASMMDLVAGYNTYAEASELGIQAVADAPATTPVCAATIAASAVSSGWCASAAASAAGGATYKLGC	127	yes	56.51	PF16934.5	Two-component Enterococcus faecalis cytolysin (EFC)	3.8e-06
WP_051837683	Streptomyces sp. NRRL F-2580	Streptomyces	1	WP_051837683_4	4	MTNDQSTLEDLVTGYESYADADEIEVDAVTGAPATTPFCGAVASFALSYVTTNGPG	630	yes	51.35	none	none	none
WP_051837683	Streptomyces sp. NRRL F-2580	Streptomyces	1	WP_051837683_5	5	MSHDQNTLEELVTGYESYADADEIEVDAVTGAPATTPFCGAAASFMLSYVTTNGPG	401	yes	49.08	PF14116.6	YyzF-like protein	7.3e-06
WP_051840194	Streptomyces lavendulae subsp. lavendulae	Streptomyces	1	WP_051840194_2	2	MQNVTEKDLFDGYTAYTSAEELGLHDGATAGPAFSPTVPWAIQATVISARSSQACAAALGSLAAKTVEKKC	2826	yes	61.06	none	none	none
WP_051840194	Streptomyces lavendulae subsp. lavendulae	Streptomyces	1	WP_051840194_1	1	MQNVTEKDLFDGYTAYTSAEELGLHDGATAGPAFSPTVPWAIQATVISARSSQACAAALGSLAAKTVEKKC	3137	yes	67.06	none	none	none
WP_051840628	Streptomyces lavendulae subsp. lavendulae	Streptomyces	1	WP_051840628_1	1	MDSMDLIAGYAAYTTPEELAASEATDAPAITTTVTSSEICITITVGWGC	176	yes	37.48	none	none	none
WP_051851944	Streptomyces sp. NRRL F-5650	Streptomyces	1	WP_051851944_3	3	MNTSDNLMAGYATYTSADEIAATLDGGAPEISPVSLSIAVSITESSYACGAGISLSVGWTVGKGC	6201	yes	50.98	none	none	none
WP_051857755	Streptomyces cellulosae	Streptomyces	1	WP_051857755_1	1	MNDIELAAGFDTYADVNEMADEVTPDEAPSPQTIVSLSIVASVKWGC	158	yes	40.92	none	none	none
WP_051859750	Streptomyces xanthophaeus	Streptomyces	1	WP_051859750_2	2	MDAATELFEGYATYVSADEAADLTIPDHELQVTPTAVITTLSLHC	42	yes	32.49	none	none	none
WP_052269673	Streptomyces pluripotens	Streptomyces	1	WP_052269673_3	3	MDVMNVEMRCAQPTGHTVTTKEMHMSAQDLMNGFAAYTDVEELAAQSATAHEEMSSTITISLITGVSISLTAEHTC	5002	yes	41.31	none	none	none
WP_052269673	Streptomyces pluripotens	Streptomyces	1	WP_052269673_2	2	MSAQNLMNGFAAYVDAEELAAQPAAEAREEQSLSVAVTLVTISLMHTYDTGC	4374	yes	45.33	none	none	none
WP_052269673	Streptomyces pluripotens	Streptomyces	1	WP_052269673_6	6	MSARDLVAGYRTIVDVEEPAEAADPTLSVISMASPPLTVTNSLA	4744	yes	9.07	none	none	none
WP_052269673	Streptomyces pluripotens	Streptomyces	1	WP_052269673_4	4	MTPHDLVDGYRTFVDVEELAVVPTGEYAPTTAIFTVSDSTTVTSTITN	4563	yes	30.21	none	none	none
WP_052269673	Streptomyces pluripotens	Streptomyces	1	WP_052269673_5	5	MSDQELIEGYRYFVDAADLAASAEQQLPTTSIFSYITTTCTTTVATVSVY	5261	yes	25.09	PF08769.11	Sporulation initiation factor Spo0A C terminal	2.2e-06
WP_052680420	Streptomyces sp. NRRL F-4428	Streptomyces	1	WP_052680420_4	4	MRNDQSTLEDLVTGYESYADADEIEVDAVTGAPATTPFCGAAASFMLSYVTTNGPG	631	yes	44.78	none	none	none
WP_052680420	Streptomyces sp. NRRL F-4428	Streptomyces	1	WP_052680420_3	3	MSHDQNTLEELVTGYESYADADEIEVDAVTGAPATTPFCGAAASFMLSYVTTNGPG	402	yes	45.27	PF14116.6	YyzF-like protein	7.3e-06
WP_052680420	Streptomyces sp. NRRL F-4428	Streptomyces	1	WP_052680420_2	2	MRNDQSTLEDLVTGYESYADADEIEVDAVTGAPATTPFCGAVASFALSYVTTNGPG	860	yes	45.93	none	none	none
WP_052680420	Streptomyces sp. NRRL F-4428	Streptomyces	1	WP_052680420_1	1	MDNASMMDLVAGYNTYAEASELGIQAVADAPATTPVCAATVAASAVSSGWCASAAASAAGGATYKLGC	128	yes	57.04	PF16934.5	Two-component Enterococcus faecalis cytolysin (EFC)	3.1e-06
WP_052808529	Streptomyces cyaneogriseus subsp. noncyanogenus	Streptomyces	1	WP_052808529_1	1	MDTHELIEGFDAYVEAEELNEDAMVDAPATTVPCTVASFATGYFSC	29	yes	43.33	none	none	none
WP_052856102	Streptomyces kasugaensis	Streptomyces	1	WP_052856102_3	3	MKTTAIMELVAGYEVYADSAELQVDATVNAPASTPACGAATVSWIVSQFSAKTVKDGC	331	yes	42.35	PF13701.6	Transposase DDE domain group 1	9e-07
WP_052856102	Streptomyces kasugaensis	Streptomyces	1	WP_052856102_2	2	MDNKSAVITDLVAGYSTYTEAGELNVSAAAGAPATTYICASVAISRTSSVKCSAAASAISGATYEWTC	66	yes	45.44	none	none	none
WP_053455886	Hapalosiphon sp. MRB220	Hapalosiphon	1	WP_053455886_1	1	MAEIKITELRPTGSELFEDSETFLKELNDDEMTVTLGGGDSLLSISADTVDKSFISVGGDVSISK	2093	yes	39.31	none	none	none
WP_053455886	Hapalosiphon sp. MRB220	Hapalosiphon	1	WP_053455886_3	3	MAEIKITELRPTGSELFEDSETFLKELNDDEMTVTLGDGDSLLSISLDTVDKSFISVGGDVSISK	1808	yes	36.1	none	none	none
WP_053455886	Hapalosiphon sp. MRB220	Hapalosiphon	1	WP_053455886_2	2	MAEIKITELRPTGSELFEDSETFLKELNDDEMTVTLGGGDSLLSISADTVDKSFISVGGDVSISK	2378	yes	37.43	none	none	none
WP_053560627	Streptomyces sp. CFMR 7	Streptomyces	1	WP_053560627_3	3	MNASAHLIAGYTAYTTAAEFDASITADAPAVTPATPSIALSIAESSYACGAGVGASIGITFTKGC	6188	yes	38.91	PF16934.5	Two-component Enterococcus faecalis cytolysin (EFC)	2e-05
WP_053706403	Streptomyces sp. WM6373	Streptomyces	1	WP_053706403_3	3	MNSNDSIMELVAGYETYMDANELDVTAVADAPATTWYCASAAVSFLSAATYEATC	146	yes	36.11	none	none	none
WP_053706403	Streptomyces sp. WM6373	Streptomyces	1	WP_053706403_2	2	MEKATSIVELLSGYEAYSSVEEINLSAASDAPATTWGCAAVSASISWMSGQVVSKTVDDGC	405	yes	44.81	PF01592.16	NifU-like N terminal domain	9e-06
WP_054237388	Actinobacteria bacterium OK006	Actinobacteria	1	WP_054237388_3	3	MNTADQLIAGYTAYTDAADFGASAAGEAPATTPSIITASSPECGAFSISAASGILTSVSITHGAGC	759	yes	40.46	none	none	none
WP_054237388	Actinobacteria bacterium OK006	Actinobacteria	1	WP_054237388_4	4	MTTRSDRIPKGNHVSTADQLIAGYTAYTDAADFGASAGGQAPATTPTILSVIAESTPACGGAVSAVSASAVGFTAHWGC	410	yes	29.68	none	none	none
WP_055533290	Streptomyces alboniger	Streptomyces	1	WP_055533290_1	1	MQVVEVPQFTDTADTIDTGELFAGYRTYTDAGELDSVFGQEEATAATVTIISTATIIVSCLC	42	yes	49.5	none	none	none
WP_055704502	Streptomyces puniciscabiei	Streptomyces	1	WP_055704502_2	2	MEKATAIEDLMAGYEAYSDARELGVTSAVDAPATSPACIASATASWLASQFSAKTISGGC	433	yes	44.41	PF06549.12	Protein of unknown function (DUF1118)	1e-06
WP_055704502	Streptomyces puniciscabiei	Streptomyces	1	WP_055704502_1	1	MDKSTAIMELVSNYTSYADVTELNVTAAADAPATTPVCAVSIASSSWCAAGASAASGATYEITC	158	yes	47.61	none	none	none
WP_057178590	Cylindrospermopsis raciborskii GIHE 2018	Cylindrospermopsis	1	WP_057178590_4	4	MASIKLDQLQTTGSELFQDSESFLNDMSDINSISVHGGFGSNVSDMSIFTKLAEAFVNTYGIGHIAYLAKSYSSGV	2177	yes	36.39	none	none	none
WP_057178590	Cylindrospermopsis raciborskii GIHE 2018	Cylindrospermopsis	1	WP_057178590_1	1	MASIKLGQLQTTGSELFQDSESFLNEMSDVNSISVYGGGSDVSDMYTLTKLGEAFVNTYGIGHIAYLAKSYSDHDYYW	1877	yes	43.58	PF00389.30	D-isomer specific 2-hydroxyacid dehydrogenase, catalytic domain	9.7e-06
WP_057178590	Cylindrospermopsis raciborskii GIHE 2018	Cylindrospermopsis	1	WP_057178590_8	8	MAKIMINDLEPINSETFINDLNNQNSQAIFGGEDPYFDGLINFGIKTLEFMVVITAINAISFLVYSFQE	1243	yes	21	none	none	none
WP_057178590	Cylindrospermopsis raciborskii GIHE 2018	Cylindrospermopsis	1	WP_057178590_3	3	MASIKLGQLQTTGSELFQDSESFLNEMSDVNSISVYGGGSYDFSDMSIFTKLAEAFVNTYGIGHIAYLAKSYSDYDY	1566	yes	37.71	none	none	none
WP_058047489	Streptomyces sp. MBT76	Streptomyces	1	WP_058047489_1	1	MQNVNEKDLFDGYTAYTSAEELGLYDGKDAAPAFSPTIPWAIRAGLITARSSQQCAAAIGSFTARTIESKC	3009	yes	60.19	PF16934.5	Two-component Enterococcus faecalis cytolysin (EFC)	1.5e-06
WP_059262025	Streptomyces corchorusii	Streptomyces	1	WP_059262025_2	2	MMNETAELATGFDAYTDLEELAAAVEASTEAKTPGFSITPTFSLTGQH	138	yes	38.74	none	none	none
WP_060892878	Streptomyces europaeiscabiei	Streptomyces	1	WP_060892878_3	3	MNTTEQLIAGYTAYTNAEEFGASAESDAPASITVTTVSSGECVYFSLSAVSGSIATTKAWGC	624	yes	50.2	none	none	none
WP_060892878	Streptomyces europaeiscabiei	Streptomyces	1	WP_060892878_4	4	MNTAEQLIAGYTAYTNAEEFGAGATAENPAITPTVLSFIGGSSAGCGGAVSAISGAGVTATVNWGC	907	yes	42.19	PF01425.21	Amidase	1.4e-05
WP_061955677	Arthrobacter sp. EpRS66	Arthrobacter	1	WP_061955677_4	4	MSNTTALTDLAQAHTIYAAPDELGADAAAEAPATSPLCIGIIVGATLGTGC	71	yes	20.74	none	none	none
WP_061955677	Arthrobacter sp. EpRS66	Arthrobacter	1	WP_061955677_1	1	MSNTTIVENNSALTDLAQAHTAYAAPSELGADAAAEAPATSPFCAGVLIGATLTVGC	494	yes	26.22	none	none	none
WP_061955677	Arthrobacter sp. EpRS66	Arthrobacter	1	WP_061955677_2	2	MSNTTALTDLAQAHTIYAAPDELGADAAAEAPATSPLCVGIIVGATLGTGC	273	yes	22.83	none	none	none
WP_062071413	Arthrobacter sp. EpRS71	Arthrobacter	1	WP_062071413_2	2	MSNAVVNFHQADLTDLARAHSTFAAAEELGGDAATEAPATSPLCIGIIVGATLGAGC	112	yes	28.74	none	none	none
WP_062071413	Arthrobacter sp. EpRS71	Arthrobacter	1	WP_062071413_1	1	MNNAVTNIPQSDLTDLARAHSTFTAADELGGDAATDAPATTPFCAGVIIGATLTMGC	376	yes	30.12	none	none	none
WP_062295185	Nostoc piscinale CENA21	Nostoc	1	WP_062295185_5	5	MANITLSELNAAGSQLFQDSESFLNELSEVDAIATHGADSNSNSYVSDFYGFNKLIEGFVGVYAIQHIYGIAKSFSHGGNYISAA	2577	yes	32.84	none	none	none
WP_062295185	Nostoc piscinale CENA21	Nostoc	1	WP_062295185_1	1	MANITLSELNAAGSQLFQDSESFLNDLSDVDAIAGGSGYGYGYGYDGFGLNKLIEGFVDVYAIQHVYGIAKSFSHGGYGVSAY	3337	yes	42.23	none	none	none
WP_062295185	Nostoc piscinale CENA21	Nostoc	1	WP_062295185_4	4	MANITLSELNVAGSQLFHDSESFLNDLSDVDMSAAYGGNNPNSYDYGYGSDSYISVFNKLIEGFVDVYAIQHIFSLAKSFSKSDY	1747	yes	34.24	none	none	none
WP_062295185	Nostoc piscinale CENA21	Nostoc	1	WP_062295185_6	6	MANITLSELNAVGSQLFQDSESFLNELSEVDAIAAHGADSNSNSYISDFYGFNKLIEGFVDVYAIQHVYGIAKSFSHGGYY	2236	yes	32.01	none	none	none
WP_062295185	Nostoc piscinale CENA21	Nostoc	1	WP_062295185_7	7	MALMDWNVKIKSKRVSYICSGNDEMAKIIITDLSPLDLDSYLTEVNELDSLFIYGGESELQQLLNFAYIFLNFVLSTYAIYSISSIAKSFKIPHPKSTYSVFKLF	1404	yes	16.86	PF16217.5	Peptidase M64 N-terminus	0.00011
WP_062295185	Nostoc piscinale CENA21	Nostoc	1	WP_062295185_2	2	MARITISDLYPSSDEQYITELTAGEATKVEAGASSSFITIDTNDLIKTQQNINSILRDVSVELEQTISNLQQQQQQPNNRYGQRSRYGGYYTDY	4174	yes	41.75	PF07575.13	Nup85 Nucleoporin	4e-06
WP_062295185	Nostoc piscinale CENA21	Nostoc	1	WP_062295185_3	3	MANITLSELNAAGSQLFQDSESFLNELSEVDAIATHGADSNSNSYISDFYGFNKLIEGFVDVYAIQHVYGIAKSFSHGGYSNSAY	2944	yes	34.56	none	none	none
WP_062339008	Herbidospora sakaeratensis	Herbidospora	1	WP_062339008_2	2	MHTDLLMEGAGAYTSLAEIAATAEAETPEVTPAISFFTGAAVSITTTMAFSC	42	yes	40.19	none	none	none
WP_062339008	Herbidospora sakaeratensis	Herbidospora	1	WP_062339008_5	5	MSTELLMEGADAYTSLAEVATAAEIEAPERLIDTIIWSICTLTLQGGC	402	yes	26.45	PF07024.13	ImpE protein	2.9e-07
WP_062339008	Herbidospora sakaeratensis	Herbidospora	1	WP_062339008_1	1	MSAELLMEGADAYTSLAEVAASGEFDSPEMLPTITVTTITTISVASFTYALDC	807	yes	47.87	none	none	none
WP_062339008	Herbidospora sakaeratensis	Herbidospora	1	WP_062339008_4	4	MSAESLMEGADAYTSLAEVATTEPAESPEATPITISITTFFSSTIILEC	585	yes	35.27	none	none	none
WP_062339008	Herbidospora sakaeratensis	Herbidospora	1	WP_062339008_3	3	MSAELLMEGAGAYTSLAEVATATESDSPEATPVVSFLTGVSYGVSVMGTYYWSC	232	yes	38.57	none	none	none
WP_062346719	Herbidospora yilanensis	Herbidospora	1	WP_062346719_1	1	MSADLLMEGADAYTSLAEVATADQIDTPEITPALTVSAIVSWSLSTTLWAEC	205	yes	39.35	none	none	none
WP_062346719	Herbidospora yilanensis	Herbidospora	1	WP_062346719_2	2	MSAESLMDGAAAYTSLAEVATADQIDVPEITPTAGYLTVSMITVATLFAEC	384	yes	35.31	none	none	none
WP_062346719	Herbidospora yilanensis	Herbidospora	1	WP_062346719_3	3	MNFLLIDHLMNGAAAYTSLSEIAVEDGPEAAPILTTSVPHTLTVYLEC	33	yes	30.88	none	none	none
WP_066371470	Herbidospora mongoliensis	Herbidospora	1	WP_066371470_2	2	MSVELLMDGADAYTSLAEIAAEIDSPEILPTITITTITTISAISVTYGIGC	2298	yes	44.88	PF16672.5	Ragulator complex protein LAMTOR5	5.9e-07
WP_066371470	Herbidospora mongoliensis	Herbidospora	1	WP_066371470_3	3	MSAELLMNGADTYTTLAEVAADQETPDAASVVTVTITIYTISIAYTLGSEC	423	yes	41.09	none	none	none
WP_066371470	Herbidospora mongoliensis	Herbidospora	1	WP_066371470_4	4	MSTELLMNGADAYTSLAEVATAEPETLDALPTPTVSISISLTYLLEC	207	yes	40.3	none	none	none
WP_066371470	Herbidospora mongoliensis	Herbidospora	1	WP_066371470_6	6	MIPITELLMQGADAYTSLAEVAAVHEIETPEVTPTVSFVLGGAVSMTLTMRYSC	2855	yes	20.7	none	none	none
WP_066371470	Herbidospora mongoliensis	Herbidospora	1	WP_066371470_7	7	MPAELLMDGADAYTSLAEVAEVDAPEIVLDIITWSICTLTLQGHC	2521	yes	19.33	none	none	none
WP_066371470	Herbidospora mongoliensis	Herbidospora	1	WP_066371470_5	5	MPADHLMDGAAAYVSLAELAAESGPEAAPILTTSLPHTLTVYLQC	44	yes	32.42	none	none	none
WP_066371470	Herbidospora mongoliensis	Herbidospora	1	WP_066371470_1	1	MSAELMMGGADAYAPLAEVATADPIETPEMTPVVSFITGLSYGVSVMGTYYWEC	2658	yes	45.59	none	none	none
WP_066383651	Anabaena sp. 4-3	Anabaena	1	WP_066383651_4	4	MAFIAVNELRATGSELFQDAESFLSELNNLDDSVHGGNYSKTTNGVLDLAEKGFEFGVITFGIDAIGHLARSFSDASNGY	2011	yes	43.66	none	none	none
WP_066383651	Anabaena sp. 4-3	Anabaena	1	WP_066383651_3	3	MAFIAVNELRATGSELFQDSESFLNELNNLDDSVHGGGSGYSGATNGVLDLAEKGFEFGVITYGIDAIGHMAKSFSDASTGGW	2788	yes	45.48	none	none	none
WP_066383651	Anabaena sp. 4-3	Anabaena	1	WP_066383651_6	6	MASINLTELHNTGSELFQDSESFLHEMTNLDHSIYGGYSGYTDNVVAFTVKAFEFSIITYGIDAIVHLVKSFSESNSQY	1635	yes	33.36	PF04124.12	Dor1-like family	7.3e-06
WP_066383651	Anabaena sp. 4-3	Anabaena	1	WP_066383651_2	2	MAFIAVNELRATGSELFQDAESFLNELNNLDDSVHGGSSGYSGATNGVLDLAVKGFEFGVITYGIDAIGHLAKSFSDASTGW	2396	yes	47.82	none	none	none
WP_066383651	Anabaena sp. 4-3	Anabaena	1	WP_066383651_1	1	MAFIAVNELRATGSELFQDSESFLNELNNLDDSVHGGYXXXXLFQDAESFLNELNNLDDSVHGGGYGYSGATNGVLDLAEKGFEFGVITYGIDAIGHMAKSFSDASTGGW	3572	yes	57.17	PF04136.15	Sec34-like family	0.00011
WP_066383651	Anabaena sp. 4-3	Anabaena	1	WP_066383651_5	5	MAFIAVNELRATGSELFQDAESFLNELNNLDDSVHGGNYSKTTNGVLDLAEKGFEFGVITFGIDAIGHLAKSFSDAGNGYY	3183	yes	41.53	none	none	none
WP_068028504	Nocardia mexicana	Nocardia	1	WP_068028504_2	2	MTTRDLIANYRSYTNASELSQSAMSDGATRTSPACISAGSAISAVSVDNTFDHSC	912	yes	21.19	none	none	none
WP_068099584	Rhodococcus sp. PBTS 1	Rhodococcus	1	WP_068099584_3	3	MSDTHDILDGLSSYAAPDEIAETNAGDVPATTVPCSALASITTAELGC	87	yes	41.03	PF02458.15	Transferase family	1e-05
WP_068099584	Rhodococcus sp. PBTS 1	Rhodococcus	1	WP_068099584_2	2	MSENTTHDILTGFDAYAAPEEITETTAADTPATTVPCSALASYTTAKLSC	310	yes	43.05	none	none	none
WP_068150862	Rhodococcus corynebacterioides NBRC 14404	Rhodococcus	1	WP_068150862_2	2	MSENTTHDILAGFDAYAAPEEITETNAADTPATTVPCSALASYTTAKLSC	330	yes	41.65	none	none	none
WP_068150862	Rhodococcus corynebacterioides NBRC 14404	Rhodococcus	1	WP_068150862_3	3	MSDTHDILDGLSSYAAPDEIAETNAGDVPATTVPCSALASITTAELGC	110	yes	37.92	PF02458.15	Transferase family	1e-05
WP_068210304	Rathayibacter tanaceti	Rathayibacter	1	WP_068210304_3	3	MSSTTAESLIAGYRSYAVQAPDLSGTTEAAPAATPGVLSFIAASTVACGTAISVVGGSVVGTTVNAGC	80	yes	29.55	PF02690.15	Na+/Pi-cotransporter	4.2e-06
WP_068210304	Rathayibacter tanaceti	Rathayibacter	1	WP_068210304_1	1	MTSNQTLIAGFSSYASAEELVSTSLESAPGATPSPISAVSVFVTASSPECALVSVGVTAGGTTTTLAAGC	336	yes	41.28	none	none	none
WP_068385845	Leptolyngbya sp. NIES-3755	Leptolyngbya	1	WP_068385845_4	4	MASIKISELRPVGSELFQDSESFLNELNDRDLDIRGGGDVNISVLSQYTASVGISIYTQSVVTVKTYNSPKTFFF	2864	yes	28.16	none	none	none
WP_068385845	Leptolyngbya sp. NIES-3755	Leptolyngbya	1	WP_068385845_3	3	MASIKISELRPVGSELFQDSESFLNELNDRDLDIRGGGDVNISVLSQYSYSYGISILTQSVVTVKTYNSPKSFFF	3138	yes	30.7	PF18500.1	CadC C-terminal domain 1	2.2e-06
WP_068385845	Leptolyngbya sp. NIES-3755	Leptolyngbya	1	WP_068385845_2	2	MASIKISELRPVGSELFQDSESFLNELNDRDLDIRGGGDVNISVLSQFTASIGISIKTASVVTVKTYNSPYSVFF	2600	yes	31.45	none	none	none
WP_068385845	Leptolyngbya sp. NIES-3755	Leptolyngbya	1	WP_068385845_5	5	MPTIKIDHLQPAGAELFQDSESYLNELSSEDTRVVGGDAQVVFISVVTQTIGVNSQVTVSMGISLQSLSVVSVVRSLPRF	2134	yes	27.62	none	none	none
WP_068385845	Leptolyngbya sp. NIES-3755	Leptolyngbya	1	WP_068385845_6	6	MSQIKISALSPAGSELFQDAESFLQDLAPSDLQDVAGGLADVVGLSIVVHPVLSLQYYSGVVQTNVTVSVAIGFQTASILSIAH	1790	yes	16.27	none	none	none
WP_068385845	Leptolyngbya sp. NIES-3755	Leptolyngbya	1	WP_068385845_1	1	MPSIQIAQLSAIGSDLFEDSESFLHELRDDDFKMINGGLVISQVTVSLGYINPPEQIAVAYRAEDTQALQALRGLFGEWFNLFDNHAAQLSVWWKLH	1410	yes	49.65	none	none	none
WP_069073064	Nostoc sp. KVJ20	Nostoc	1	WP_069073064_1	1	MATITLSELYLSGSELFQDSESFLNDLSDANSTSVYGGHGAGFDPLLDYGIKGYEFALLGLGINNVVSLAKSFSGTSIASANSTCG	2366	yes	36.33	none	none	none
WP_069073064	Nostoc sp. KVJ20	Nostoc	1	WP_069073064_4	4	MANITLSELQVGSALFQDSESFLTDLNDVNAVYGGEGYGYDPFLEYGAKGFEFSILGLGINNVVSLAKSFSEGDGFL	2794	yes	30.97	none	none	none
WP_069073064	Nostoc sp. KVJ20	Nostoc	1	WP_069073064_7	7	MTKITLFELRPLGSELFQDSENFLTDLSDMDSISINGGEGYGYEQLLQYGIKGFEFSILGFGINNVVSLAKSFSEGV	1958	yes	25.92	PF14285.6	Domain of unknown function (DUF4367)	2.7e-06
WP_069073064	Nostoc sp. KVJ20	Nostoc	1	WP_069073064_5	5	MANITLSELQVGSVLFQDSESFLTDLNDMNAVYGGEGYGFDPFLEYGAKGFEFSILGLGVNNVVSLAKSFSEDV	3556	yes	30.13	none	none	none
WP_069073064	Nostoc sp. KVJ20	Nostoc	1	WP_069073064_6	6	MANITLSELQVGSALFQDSESFLTDLNDMNAVYGGEGYGFDELLDYGAKGFEFSILGLGVNNVVSLAKSLSEAD	3171	yes	29.38	none	none	none
WP_069073064	Nostoc sp. KVJ20	Nostoc	1	WP_069073064_8	8	MSNITISELRPADSENYLTDLTNMDSMLVYGGEEDDFTQMLNFGVKSLEFMLLSFAIYNNTLLAKSFNPNGNVT	1380	yes	15.65	none	none	none
WP_069887141	Streptomyces luteocolor	Streptomyces	1	WP_069887141_1	1	MKIENPAESLVSGYRVYTDGDQVAQVAGTEGPETTASITTATPVITTTTLIFDC	102	yes	53.21	none	none	none
WP_070396036	Moorea producens PAL-8-15-08-1	Moorea	1	WP_070396036_3	3	MSNIKISELRSAGSELFYDSESFLNELTDEQEIDSVLGGFRIHPFSKRTIPFPIKTFPIKTFPIHPFPICFPRTIRTRRPRKIH	2416	no	10.1	PF07265.11	Tapetum specific protein TAP35/TAP44	1.3e-05
WP_070396036	Moorea producens PAL-8-15-08-1	Moorea	1	WP_070396036_1	1	MSSIKIAELRPAGSELFQDSESFLNELSDGQEMDMVLGGGRRSKRSRGGNVNTVNTIFNTVINTTIINTTIINKRRGRRPRKH	2014	yes	30.37	PF04604.13	Type-A lantibiotic	4.3e-06
WP_070396421	Moorea producens PAL-8-15-08-1	Moorea	1	WP_070396421_4	4	MSNFSISDLPPAGSALFSESEGFHEFMKEVTEDELKGIEGGGKKNKGGFFFGSKSSKGFKSSRFKPSRSKSSRFKPSKFKPSKGGFFFPHPYGFFPHNCRPVH	1714	yes	10.98	PF10439.9	Bacteriocin class II with double-glycine leader peptide	5e-06
WP_071107270	Moorea producens JHB	Moorea	1	WP_071107270_2	2	MSNIKISELRSAGSELFHDSESFLNELTDEQEIDSVLGGFRIHPFSKRTITFPKTFPSKTFPIHPFPTCFPRTIRTIGKPIKAH	2307	no	8.74	none	none	none
WP_071107270	Moorea producens JHB	Moorea	1	WP_071107270_1	1	MSSIKIAELRPAGSELFQDSESFLNELSDGQEMDMVLGGGRRSGFSFSFGSFRTINSTINTASLVSKSVVTTKSVVTVNTIAKGGKGKKGKKRH	2148	yes	32.93	PF04604.13	Type-A lantibiotic	2.9e-06
WP_071189061	Trichormus sp. NMC-1	Trichormus	1	WP_071189061_3	3	MASIKLSELQATGSELFQDSESFLNEMSDVNSIYGGYYDSGASDISTFTKLAEAFVNVYAIGHIAYLAKSYSDSKY	2017	yes	28.53	none	none	none
WP_071189061	Trichormus sp. NMC-1	Trichormus	1	WP_071189061_2	2	MASIKLSELQATGSELFQDSESFLNEMSDVNSIYGGYYDSDVSDVSTLTKLAEAFVNVYGIGHIAYLAKSYSDSKY	1733	yes	30.93	none	none	none
WP_071189061	Trichormus sp. NMC-1	Trichormus	1	WP_071189061_4	4	MARIIIADLHPLDSEVFLNELTSLDSQSVFGGQDNYRPQIAEVGVKALEFILVIAAIDAISFLTTSFINKD	1363	yes	27.08	none	none	none
WP_071383933	Streptomyces monashensis	Streptomyces	1	WP_071383933_2	2	MNTADQLIAGYTAYTSAEEFGVTAEGDAPATTPSILVSIDMSSAACGATIGYSISKTVNGGC	761	yes	42.7	none	none	none
WP_071383933	Streptomyces monashensis	Streptomyces	1	WP_071383933_3	3	MNTADQLIAGYTAYTSAEEFGVTAEGDAPATTPVTVTTVSSPECVQVSITVVGTTISGNC	514	yes	38.89	none	none	none
WP_072713661	Rhodococcus rhodnii NBRC 100604	Rhodococcus	1	WP_072713661_1	1	MALSDGYRMYTTDDELAAGNVSGVAAPATTPVLVPLLLRATLIAQKSSQQCAISLAGGTPNVKKTIQSVC	2546	yes	11.85	none	none	none
WP_072808981	Rhodococcus zopfii NBRC 100606 = JCM 9919	Rhodococcus	1	WP_072808981_1	1	MALSDGYRMYTTDDELAAGGASGVGAPATTPVLTPLLLRATLIAQKSSQQCAITLAGGTPNVKNTIQKVC	2551	yes	27.06	none	none	none
WP_073591536	Phormidium ambiguum IAM M-71	Phormidium	1	WP_073591536_1	1	MSTIKISDISPVGYDLFSDSESYMMALSEDEFSDIGGAGSPSALTIVTTWACIGGAALVAVSGLAASYAVGRWG	2925	no	33.87	none	none	none
WP_073591536	Phormidium ambiguum IAM M-71	Phormidium	1	WP_073591536_4	4	MAILYVDDLKPTGLDLMSGEESFLSDLSDEQTNLTYGGATATPYFIVFIGAAALSYQVGRNHRE	3216	no	27.01	none	none	none
WP_073639381	Nostoc calcicola FACHB-389	Nostoc	1	WP_073639381_1	1	MGNTKNSALNPTGSELFMDSESFLQDLADTDAMNVQGGEGPPINKLLEFGVTVYALNNVVSLAKSFSKYSKA	1988	yes	32.63	none	none	none
WP_073639381	Nostoc calcicola FACHB-389	Nostoc	1	WP_073639381_2	2	MNKTSTFEIFHNCEILLQELSDVDSMMINGGKSNTYFHDSNFERKLLEYALVGFAISNIVSLVKLFLDTRQHR	1533	yes	18.99	none	none	none
WP_073643028	Nostoc calcicola FACHB-389	Nostoc	1	WP_073643028_3	3	MSNIAISNLRPAGADLFQDSENFLHELTEQEIADVLGGARVIILFTALCFEW	1447	yes	30.76	NF000539.0	plantaricin: plantaricin C family lantibiotic	4.5e-06
WP_073644071	Nostoc calcicola FACHB-389	Nostoc	1	WP_073644071_5	5	MANITLSELYVSGSELFEGAESFLNDLSDVDSISGGNSSNFSDMSSLTKLAEAYVDTYAIGHITFIAKSFSQSKG	2355	yes	28.95	none	none	none
WP_073644071	Nostoc calcicola FACHB-389	Nostoc	1	WP_073644071_2	2	MANITLSELYVSGSELFQGTESFLNDLSDVDSISGGNYAGFSDISTLTKLAEAYVDTYAIGHITFVAKSYSNGTYY	2746	yes	32.12	none	none	none
WP_073644071	Nostoc calcicola FACHB-389	Nostoc	1	WP_073644071_6	6	MANITLSELYVSGFELFEGAESFLNDLNDADSISGGNYGGFSDISTLTKLAEAYVDTYAIGHVTFVAKSYSKGGWY	3534	yes	27.54	none	none	none
WP_073644071	Nostoc calcicola FACHB-389	Nostoc	1	WP_073644071_8	8	MANLTLSELYFSGSEFFQGEESFLSDLSDVDSIFGGDSSQFSDMSILTKLLEAYVNIYAIGQIAFIATSYSKQ	1568	yes	24.69	none	none	none
WP_073644071	Nostoc calcicola FACHB-389	Nostoc	1	WP_073644071_1	1	MANITLSELYVSGSELFEGVESFLNDLSDTDSISGGNYVGFSDISTLTKLAEAYVDTYAIGHVTFVAKSYSNGTYY	3140	yes	33.89	none	none	none
WP_073644071	Nostoc calcicola FACHB-389	Nostoc	1	WP_073644071_4	4	MANITLSELYVSGSELFEGTESFLNDLGDIDSISGGDSSNFSDLSSLTKLAEAYVDTYAIGHIAFIAKSFSQSKG	1959	yes	29.12	none	none	none
WP_073726342	Streptomyces sp. CB02414	Streptomyces	1	WP_073726342_1	1	MQNDIEIMELVGGFEAYTEAAELNMEASVEAPAATPTATIVYTKFSVASVTLTAKKGC	6774	yes	53.37	none	none	none
WP_078760724	Marinactinospora thermotolerans DSM 45154	Marinactinospora	1	WP_078760724_2	2	MEKSNEIMELISGYQTWTDADAMNVSSESEAPAATTTFCAFTVSYAFTRQTVIDGC	357	yes	39.44	none	none	none
WP_078760724	Marinactinospora thermotolerans DSM 45154	Marinactinospora	1	WP_078760724_1	1	MQKNLAIMELMEGYGAYTDVAELNISAAADAPASITVTTVSITTLPCIYAASAVSSAPCAAFSGGVAATVVNGC	76	yes	42.54	none	none	none
WP_079151368	Streptomyces sparsogenes	Streptomyces	1	WP_079151368_1	1	MSAIDLMGGYAAYTTPDAAVAELATTGNAADQSTITIITTTLSLITTITAGDAPV	1473	no	48.54	none	none	none
WP_079181075	Streptomyces sp. CB00316	Streptomyces	1	WP_079181075_4	4	MKTTTIMELAAGYDAYTGAEELEVGATAEAPASTPLCAAAASAGVSWMASQFSARTISGGC	466	yes	33.65	none	none	none
WP_079181075	Streptomyces sp. CB00316	Streptomyces	1	WP_079181075_2	2	MSNKSTVIADLVAGYDAYTEVDELNVSAAAGAPATTWVCVSVVASRASSVKCGAWASAGASAVSGATYEITC	178	yes	44.69	none	none	none
WP_079189213	Streptomyces kebangsaanensis	Streptomyces	1	WP_079189213_2	2	MEKTTAIMELLAGYEAYSDARELNVTAAAEAPATSPACIASATASFVASQFSAKTVAGGC	488	yes	37.69	none	none	none
WP_079189213	Streptomyces kebangsaanensis	Streptomyces	1	WP_079189213_1	1	MDKSMAIMELVSNYDAYADVDELNITAAADAPATTPVCAASVASSSWCAASASAVSGATYELTC	224	yes	38.55	none	none	none
WP_079191916	Streptomyces sp. CB00455	Streptomyces	1	WP_079191916_2	2	MEKATSVIELLSGYEAYASAEDINLSAASDAPATTWGCAAVSASISWMSGQVVSKTVDDGC	306	yes	37.43	none	none	none
WP_079191916	Streptomyces sp. CB00455	Streptomyces	1	WP_079191916_3	3	MNNTDSVMDLVAGYQTYMDAGDLDVSAVADAPATTWYCASAAASFLSAVTYEATC	99	yes	34.11	none	none	none
WP_083744359	Microbispora rosea	Microbispora	1	WP_083744359_3	3	MSDTELLINGYAAYTDAEEFGASVSAEAPGTTPATITTVSSVECVMFSVGFASATFAGGC	4955	yes	54.29	none	none	none
WP_083744359	Microbispora rosea	Microbispora	1	WP_083744359_2	2	MNNLADELISGYTAYTSAEEVGVTTAADAPATTPTILSFIGASSLACGATIGSIVTGTVKIGC	7438	yes	59.86	PF15967.5	Nucleoporin FG repeated region	5.1e-06
WP_084520237	Nocardia mexicana	Nocardia	1	WP_084520237_1	1	MTTRDLIANYRSYTNASELSQSAMSDGATRTSPACISAGSAISAVSVDNTFDHSC	5496	yes	21.19	none	none	none
WP_084890433	Williamsia sp. 1135	Williamsia	1	WP_084890433_4	4	MSETVTQSLVAGYRSYAAAPELTEMSETAPSATPGILSFIGVSSTACGTAVSVVSSGGVGATIAWGC	85	yes	17.97	PF17700.1	Family of unknown function (DUF5546)	7e-07
WP_084890433	Williamsia sp. 1135	Williamsia	1	WP_084890433_2	2	MPNSQSLISGYSNYARGEELAQVSVESAPGISPISVFATASSPECAAFSIGASAGVVTSTSITIGAGC	376	yes	31.79	none	none	none
WP_086689015	Nostoc sp. T09	Nostoc	1	WP_086689015_1	1	MANIKVSELNLAGAELFQDSESFLNDLTDVDTTAVHGGEGAYFPEFSDLGYKVLEYGLVGFGITNIVSLVKSFSTTGGGNNGGGGTSITL	1904	yes	46.82	none	none	none
WP_086689015	Nostoc sp. T09	Nostoc	1	WP_086689015_3	3	MASITIPDLHPTENLNSLDELTPREMSNVIGGVQVKINWTQRDIKLFQLIQALQDPNRDPEKNPITIKFF	2753	yes	18.23	PF04604.13	Type-A lantibiotic	5e-07
WP_086689015	Nostoc sp. T09	Nostoc	1	WP_086689015_2	2	MTRIVIFDLHHSNSRKLENSESFLDDLTEIDSMSVHGGEGYNFNEFLNLGVKVLEYALVGFAIYNIVSLVQLFLAPQQRQIGTYPPTTPL	1500	yes	22.86	none	none	none
WP_086760950	Nostoc sp. RF31YmG	Nostoc	1	WP_086760950_9	9	MATIRIEQLSAGFELIADEETFLDELTDSDLDLNKGGITPVITSLIVFSAGYGVGRAITAIF	3302	yes	26.84	none	none	none
WP_086760950	Nostoc sp. RF31YmG	Nostoc	1	WP_086760950_3	3	MAAITVHDLRPAGADLFAGSENFMSDLADSELNTVNGGLTPVVIWGVAIASEYVIGAFAVGVGAGIYTAVKK	3057	yes	54.44	PF10439.9	Bacteriocin class II with double-glycine leader peptide	4.3e-06
WP_086760950	Nostoc sp. RF31YmG	Nostoc	1	WP_086760950_7	7	MATIRIEQLSAGFELIADEETFLDELTDSDLDLNKGGITPVITSLIVFSAGYGVGRAISEIFK	2314	yes	35.37	none	none	none
WP_086760950	Nostoc sp. RF31YmG	Nostoc	1	WP_086760950_4	4	MAAIAIHDLRPAGADLFAGSENFMSDLVDSELNAVNGGISPLVIWGVAITSEYVISAFGVGVGAGIYTALK	2072	yes	49	none	none	none
WP_086760950	Nostoc sp. RF31YmG	Nostoc	1	WP_086760950_11	11	MSRLKVSDLNSAGSEFFQDSETFLLDLKDDELCMQYGGIFITTNISVINVPISEDIFAPSISFIR	1796	yes	21.54	none	none	none
WP_086760950	Nostoc sp. RF31YmG	Nostoc	1	WP_086760950_12	12	MSTIKIENIAPKGSELFLDRESYLDRLSESDILTIQGGYLTINYTTVLTTKTIVTTPYTIIGTGPIIQPTPPVFIA	1323	yes	20.15	PF05150.12	Legionella pneumophila major outer membrane protein precursor	1.3e-05
WP_086769105	Nostoc sp. 106C	Nostoc	1	WP_086769105_4	4	MAVIKISELRPAGSELFQDSESFLNELSESREVDQVLGGLNTIFTVNANTVNANTVTNVNTIRSIVISA	2952	yes	32.88	PF04604.13	Type-A lantibiotic	1.1e-06
WP_086769105	Nostoc sp. 106C	Nostoc	1	WP_086769105_2	2	MAVIKISELRPAGSELFQDSESFLNELSENREVDQVLGGLNTIATANANTLNANTFTNVNTIRSIVVTA	3442	yes	37.04	PF04604.13	Type-A lantibiotic	1.6e-06
WP_086769105	Nostoc sp. 106C	Nostoc	1	WP_086769105_3	3	MAVIKISELRPAGSELFQDSESFLNELSESREVDQVLGGLNTIFTVNANTANANTFGNVNTIRSIVISA	3197	yes	36.38	PF04604.13	Type-A lantibiotic	9e-07
WP_086769105	Nostoc sp. 106C	Nostoc	1	WP_086769105_1	1	MPNIKISELQAVGYELLNDSESFLQELTDHEVVVVGQGVQVQSVAASGVVVNLNFNNVNGNTANANTFGNVNTVAYFRR	1787	yes	38.7	none	none	none
WP_086769105	Nostoc sp. 106C	Nostoc	1	WP_086769105_5	5	MPSIHISELFPIGSKLFQDSETFLNEINDNELQNIKGGASIVSEVNNSAINNTFGNAQSDTTNNGNINALAVTVVDDTAILTTIL	2386	yes	26.12	PF04604.13	Type-A lantibiotic	1.5e-05
WP_086820173	Allokutzneria sp. NRRL B-24872	Allokutzneria	1	WP_086820173_3	3	MLLQDDRMAAELAAGYDTYTTSTELTMAVGDGYEIVAKSTSTATPVITTTTLIFSCGPRC	3201	yes	47.22	none	none	none
WP_086820173	Allokutzneria sp. NRRL B-24872	Allokutzneria	1	WP_086820173_1	1	MLLQDDRMAAELAAGFDTYTTPAELTMAVGDGYEVVAKSVTTATPAITTTTLIFSCHQGCD	56	yes	48.83	PF11448.8	Protein of unknown function (DUF3005)	4.1e-06
WP_086820178	Allokutzneria sp. NRRL B-24872	Allokutzneria	1	WP_086820178_3	3	MLLQDDRMAAELAAGYDTYTTSTELTMAVGDGYEIVAKSTSTATPVITTTTLIFSCGPRC	54	yes	47.22	none	none	none
WP_086820178	Allokutzneria sp. NRRL B-24872	Allokutzneria	1	WP_086820178_1	1	MLLQDDRMAAELAAGFDTYTTPAELTMAVGDGYEVVAKSVTTATPAITTTTLIFSCHQGCD	4393	yes	48.83	PF11448.8	Protein of unknown function (DUF3005)	4.1e-06
WP_086829041	Allokutzneria sp. NRRL B-24872	Allokutzneria	1	WP_086829041_1	1	MELVTTNTATLVASEQLMAGYAEYTDATELTMVAGEGAPMGFTPAVVTVTIPWTTISVTTGTIVAGCGNAND	56	yes	61.93	PF10554.9	Ash protein family	1.8e-06
WP_086835908	Nostoc sp. RF31YmG	Nostoc	1	WP_086835908_1	1	MANIVISQLRPAGAELFDGSESFMSDLTDSELDATKGGITPAVFFAGVAVGIAITFKLK	436	yes	28.85	none	none	none
WP_087539234	Nostocales cyanobacterium HT-58-2	Nostocales	1	WP_087539234_6	6	MAHIKVSELRPAGSELFIDSESYLNDLSDMDTTSVHGGFGTGFDIFTAVNFKVLEAGVVGLGITNVVSLVKSFSGGASHSGY	3294	yes	31.45	none	none	none
WP_087539234	Nostocales cyanobacterium HT-58-2	Nostocales	1	WP_087539234_3	3	MAHIKVLELRPAGSELFIDSETYLNDLSDVDTTSVHGGFGHGFTAFTAVNFKVLEAGAIGLGITNVVSLVKSFSGGASTGGY	3633	yes	40.23	none	none	none
WP_087539234	Nostocales cyanobacterium HT-58-2	Nostocales	1	WP_087539234_4	4	MAHIKVLELRPAGSELFIDSETYLNDLSDVDTTSVHGGFGHGFTAFTAVNFKVLEAGAMGLGITNVVSLVKSFSGGASTGGY	2551	yes	39.13	none	none	none
WP_087539234	Nostocales cyanobacterium HT-58-2	Nostocales	1	WP_087539234_1	1	MAHIKVSELRPAGSELFIDSESYLNDLSDVDATSVHGGFGHGFGVFTAVNFKVLEAGAVGLGITNVVSLVKSFSGGGESTASFGGVGIANDIGINANPKGANIVIG	2883	yes	47.55	none	none	none
WP_087539234	Nostocales cyanobacterium HT-58-2	Nostocales	1	WP_087539234_7	7	MAHIKVSELRPAGSELFIDSESYLNDLSDMDTTFVHGGFGHGLMEFTAVNFKVLEAGAIGLGITNVVSLVKSFSTFINQGPG	2212	yes	31.3	none	none	none
WP_087539234	Nostocales cyanobacterium HT-58-2	Nostocales	1	WP_087539234_9	9	MDATFVHGGFGHGFEAFATINFKVLEAGVLGLGITNVVSLAKSFSKTDTDIF	1902	yes	10.93	none	none	none
WP_087539234	Nostocales cyanobacterium HT-58-2	Nostocales	1	WP_087539234_5	5	MARIVISDLHPVNSEDSETFMHDLTDRDSMFVYGGMGDGFSQLFKYGGVGDEFSQFLELNMKVLDATVVGFAIYYIASLVKLFLGSPRDQF	1524	yes	38.08	none	none	none
WP_087539234	Nostocales cyanobacterium HT-58-2	Nostocales	1	WP_087539234_2	2	MAHIKVSELRPAGSELFIDSESFLNDLSDVDVSSVHGGFGHGLGVFTALNFKVLEAGVVGLGITNVVSLVKSFSGGGESTAAGNVGISTDGATHGSIVIG	3965	yes	42.96	none	none	none
WP_087539234	Nostocales cyanobacterium HT-58-2	Nostocales	1	WP_087539234_8	8	MAILTISDLHPTDNEKLLDALTDMETKVIVGGVSANGGISLKLRNLSPYQLQFFRIATALSDPDRGPLTLRF	5199	yes	22.01	PF07240.11	Stress-inducible humoral factor Turandot	1.4e-05
WP_087542717	Nostocales cyanobacterium HT-58-2	Nostocales	1	WP_087542717_1	1	MPSIKVSDLRPVGHELFEGSENYLYELVDHEMMIEGGGRFQSVVVIGDVSIFAATVVTANANSINANTVGNANTLV	1758	yes	42.35	none	none	none
WP_087542717	Nostocales cyanobacterium HT-58-2	Nostocales	1	WP_087542717_4	4	MAIIKISELRPAGSELFQDSESFLNELTEQETVGLEGGFAFNGTLGVSISAQTVNGNTVNANTFGNINTAVIA	2798	yes	35.97	NF000539.0	plantaricin: plantaricin C family lantibiotic	7.9e-06
WP_087542717	Nostocales cyanobacterium HT-58-2	Nostocales	1	WP_087542717_5	5	MAIIKISELRPAGSELFQDSESFLNELTEKEMSGLEGGLFFAFNGTFGVSVSAQTVNGNTVNANTLGNINTAVIA	3380	yes	31.87	NF000539.0	plantaricin: plantaricin C family lantibiotic	4.4e-06
WP_087542717	Nostocales cyanobacterium HT-58-2	Nostocales	1	WP_087542717_2	2	MAIIKISELRPAGSELFQDSESFLNELTEQETVGLEGGFAFNGTLGVSISAQTVNGNTVNANTLGNINTAVIA	3089	yes	40.32	NF000539.0	plantaricin: plantaricin C family lantibiotic	9.3e-06
WP_087542717	Nostocales cyanobacterium HT-58-2	Nostocales	1	WP_087542717_3	3	MAIIKISELRPAGSELFQDSESFLNELTEQETVGLEGGFAFNGTLGISISAQTVNGNTINANTAGNINTAVIA	2507	yes	38.49	NF000539.0	plantaricin: plantaricin C family lantibiotic	9.3e-06
WP_087592205	Cyanobacteria unicellular cyanobacterium SU3	Cyanobacteria	1	WP_087592205_11	11	MADIKISNLNPVGSDLFNDSESFMTELTDEQIKTTHGGSTTPCYAIILLLL	792	yes	17.8	NF000539.0	plantaricin: plantaricin C family lantibiotic	3.8e-06
WP_087592205	Cyanobacteria unicellular cyanobacterium SU3	Cyanobacteria	1	WP_087592205_9	9	MADIKISNLNPVGSDFFNDSESFMTELTDEQIKTTHGGSTTVCYVVIGYLIAKK	387	yes	19.69	NF000539.0	plantaricin: plantaricin C family lantibiotic	7.8e-06
WP_087592205	Cyanobacteria unicellular cyanobacterium SU3	Cyanobacteria	1	WP_087592205_6	6	MADIKISNLNPAGSDFFNDSESFMTELTDEQIKTTHGGSTAICYIAIGYLLAQ	590	yes	24.07	NF000539.0	plantaricin: plantaricin C family lantibiotic	5.8e-06
WP_087811088	Streptomyces sp. CS113	Streptomyces	1	WP_087811088_2	2	MEKNLDELVSGFDAYTDVDELAAAMEASSSAKTPGFSITPTFSLTGNH	140	yes	37.16	none	none	none
WP_088242795	Calothrix rhizosoleniae SC01	Calothrix	1	WP_088242795_2	2	MANIKISELRPSGFDLFEDSESFLNDMNEMDSMSVHGGAGYGYSKYLQYGIGGFAINNIVSVYSKFSRVGSFY	1989	yes	32.27	none	none	none
WP_088242795	Calothrix rhizosoleniae SC01	Calothrix	1	WP_088242795_3	3	MAKIIISDLSQTIIYTEISKSKLMENINDQELRFIYGGKNSDFDQLLNYFLAGLAIYSIKSIVDSLD	1535	yes	17.27	PF18409.1	Polo-like Kinase 4 Polo Box 2	1.9e-06
WP_089091039	Nodularia sp. NIES-3585	Nodularia	1	WP_089091039_2	2	MANITLSELHAAGSELFNDSESFLNEFSDVDSISGGGIGGYAGGVSDPATLMKLAEAFVTVYAIGHVTVLAKSFSASQA	3307	yes	37.47	none	none	none
WP_089091039	Nodularia sp. NIES-3585	Nodularia	1	WP_089091039_3	3	MANIKLSELNAIGSELFLDSESFLNELNDVDSISGGSTSSQGYDQGYGYEGISGISTLTKLAEAFVTVYAIGHVTELAKSFSHGY	3721	yes	33.61	none	none	none
WP_089091039	Nodularia sp. NIES-3585	Nodularia	1	WP_089091039_1	1	MANITLSEINAAGSELFQDSESFLNEFSDVDSISGGQIGYGGGLGAQVAVSDPTTLNKLAGAFVTVYAIGHVTVLAKSFSKF	2883	yes	43.32	none	none	none
WP_089091039	Nodularia sp. NIES-3585	Nodularia	1	WP_089091039_4	4	MANITLSELHAAGSELFNDSESFLNEFSDVDSISGGADASYAASNASTLTKLAEAFVLVYAIDHVTVLAKSFSLSVI	2496	yes	33.48	PF07737.11	Anthrax toxin lethal factor, N- and C-terminal domain	0.0015
WP_089091039	Nodularia sp. NIES-3585	Nodularia	1	WP_089091039_5	5	MANITLSQLYATGSELFHDSESFLHELSDVDSSSKGQYNVVGGIFTLTVLAGTFVGTYGIGHATHVAKSYSRPHYRY	2114	yes	27.96	none	none	none
WP_089091039	Nodularia sp. NIES-3585	Nodularia	1	WP_089091039_7	7	MAGIVISELHPTESESFLIEITDMSSISVYGGNQYEIDYAFHQMLNFTYRLMDFMLSVFAIYSIVSLAQSFITPSEFNLAHDPFYSL	1398	yes	22.81	PF10852.8	Protein of unknown function (DUF2651)	1.4e-06
WP_089126833	Tolypothrix sp. NIES-4075	Tolypothrix	1	WP_089126833_1	1	MKNTDKNITNNIKNDVPVAGTDLFADSEDFLNELTDSELVQIAGGSSGLSLLLCHEPSNVSLAGCD	81	yes	19.11	NF000539.0	plantaricin: plantaricin C family lantibiotic	5.6e-06
WP_089126836	Tolypothrix sp. NIES-4075	Tolypothrix	1	WP_089126836_1	1	MKNTDKNITNNIKNDVPVAGTDLFADSEDFLNELTDSELVQIAGGSSGLSLLLCHEPSNVSLAGCD	1959	yes	19.11	NF000539.0	plantaricin: plantaricin C family lantibiotic	5.6e-06
WP_089505437	Streptomyces sp. NBS 14/10	Streptomyces	1	WP_089505437_1	1	MSAIDLMGGYAAYTTPDAAVAELATTRTVHDPDASAITTIIITTTLSLLTTITKGD	1473	no	50.15	none	none	none
WP_091097544	Nonomuraea pusilla	Nonomuraea	1	WP_091097544_2	2	MHDVVRPSKTAAIMELTAGYDAYADASEFTLPAESEAPAATPVTILVLGGFATSYVVSGIARKAWDRTFIFGC	266	yes	38.48	PF05365.12	Ubiquinol-cytochrome C reductase, UQCRX/QCR9 like	1e-05
WP_091097544	Nonomuraea pusilla	Nonomuraea	1	WP_091097544_1	1	MTKSTAIMELVAGYDSYADARELQVSAVSDAPELWFTIWAISYGVRVSSAKCAIWASAASGAVSGWILNR	6	yes	53.02	none	none	none
WP_091465037	Paenarthrobacter nitroguajacolicus	Paenarthrobacter	1	WP_091465037_2	2	MTNTITDIPQADLTDLARAHSTFTAADELGGDAATDAPATSPFCAGVIIGATLTMGC	393	yes	24.7	none	none	none
WP_091465037	Paenarthrobacter nitroguajacolicus	Paenarthrobacter	1	WP_091465037_1	1	MSNAIVNFHQADLTDLARAHSTFAAADELGGDAATEAPATSPLCIGIIVGATLGAGC	113	yes	30.6	none	none	none
WP_093619522	Actinoplanes philippinensis	Actinoplanes	1	WP_093619522_5	5	MEQIETVMELVANYEAYTTGAEELAVSAAADAPATSAPCAAAGVSWIVSQFSGKTISEGC	343	yes	49.72	none	none	none
WP_093619522	Actinoplanes philippinensis	Actinoplanes	1	WP_093619522_4	4	MSNNTENTEIVDLVAQYETYAEANELNLSAASDAPATSPVCAVSAASSTWCAAGASAVSGATYEFVC	671	yes	50.47	PF16934.5	Two-component Enterococcus faecalis cytolysin (EFC)	3.8e-06
WP_093619522	Actinoplanes philippinensis	Actinoplanes	1	WP_093619522_1	1	MDKNTEIVDLVAQYETYAEANELNLSAASDAPATSPVCAVSAASSTWCAAGASAVSGATYEFVC	85	yes	54.15	PF08015.11	Fungal mating-type pheromone	3.2e-07
WP_093619522	Actinoplanes philippinensis	Actinoplanes	1	WP_093619522_3	3	MEKTENLNELIEGYLVYSETDELNVAAAADAPATSAPCAAATASWLISQFSGKTIAEGC	913	yes	51.84	none	none	none
WP_093831028	Streptomyces sp. SID4950	Streptomyces	1	WP_093831028_1	1	MSAQDLMNGYALYTDAEELAAQVVDAPAQESSPICLSFISGISVSLTAEHTC	4673	yes	41.8	none	none	none
WP_093908736	Streptomyces sp. cf386	Streptomyces	1	WP_093908736_1	1	MQSTQNEKDLFEGYTAYTSAEELGLYDGKDAAPAFSPTIPWAIRATIITARSSQQCAAAIGSLTAKTIENKC	2855	yes	63.83	PF16934.5	Two-component Enterococcus faecalis cytolysin (EFC)	3.8e-06
WP_094742457	Rhodococcus sp. 14-2483-1-2	Rhodococcus	1	WP_094742457_2	2	MSLATAYKTYTSDEELASNGIAGASAPASTPALAILLMRATMISARSSTQCAAGIAGGTPNIGNTIKRVC	2565	yes	14.81	none	none	none
WP_095933898	Streptomyces sp. Tue6028	Streptomyces	1	WP_095933898_2	2	MDATELIEGYAMYVSPEEAAAVEIPDLEVEGRTGPPVTIAVTLTVHC	62	yes	33.94	none	none	none
WP_096285992	Arthrobacter sp. MYb216	Arthrobacter	1	WP_096285992_2	2	MDNNALAPQANLTDLAQAHNTFTTAGELGADAATEAPATSPLCVGIIIGATLGAGC	173	yes	31.3	none	none	none
WP_096285992	Arthrobacter sp. MYb216	Arthrobacter	1	WP_096285992_3	3	MDNNALAPQANLTDLAQAHNTFTTAGELGADAATEAPATSPFCAGVLIGATLTMGC	603	yes	28.66	none	none	none
WP_096285992	Arthrobacter sp. MYb216	Arthrobacter	1	WP_096285992_1	1	MDNNALAPQANLTDLAQAHNTFTTAGELGADAATEAPATSPLCVGIIIGATLGAGC	388	yes	32.52	none	none	none
WP_096536886	Nostoc linckia NIES-25	Nostoc	1	WP_096536886_3	3	MANITLSELYVSGSELFEGTESFLNDFSDVDSISGGSEWSGFSDLSTLTKLAEAYVDTYAIGHIAFIAKSYSSSSAV	1708	yes	30.32	none	none	none
WP_096536886	Nostoc linckia NIES-25	Nostoc	1	WP_096536886_1	1	MANITLSELYVSGSELFEGSESFLNDLGDADSISGGNYNGFSDISTLTKLAEAYVDTYAIGHVTFVAKSYSHGTYY	2505	yes	35.79	none	none	none
WP_096536886	Nostoc linckia NIES-25	Nostoc	1	WP_096536886_5	5	MANITLSELYVSGSELFEGTESFLNDLGDAESISGGNYANFSDISSLTKLAEAYVDTYAIGHVTFVAKSYSHGTYY	3307	yes	28.48	none	none	none
WP_096536886	Nostoc linckia NIES-25	Nostoc	1	WP_096536886_4	4	MANITLSELYVSGSELFEGTESFLNDLNDADSISGGNYNGFSDISTLTKLAEAYVDTYAIGHVTFVAKSYSSSGAGGYY	2902	yes	28.61	PF14202.6	Transposon-encoded protein TnpW	1.4e-05
WP_096536886	Nostoc linckia NIES-25	Nostoc	1	WP_096536886_6	6	MANITLSELYVSGSELFEGTESFLNDLGDADSISGGNYSGFSDISTLTKLAEAYVDTYAIGHITFVAKSYSSSSAY	2111	yes	24.24	PF14202.6	Transposon-encoded protein TnpW	1.5e-05
WP_096537472	Nostoc linckia NIES-25	Nostoc	1	WP_096537472_3	3	MATIKIHDLSPAGSELFQDSESFLNELTDEELGVNGGLRVASVTVTVTVTWTWTWTW	981	yes	27.62	none	none	none
WP_096537472	Nostoc linckia NIES-25	Nostoc	1	WP_096537472_2	2	MATIKIHDLSPAGSELFQDSESFLNELTDAELGVHGGRAAESVSISISVTLTVTYSWSWTW	1241	yes	28.07	none	none	none
WP_096537472	Nostoc linckia NIES-25	Nostoc	1	WP_096537472_4	4	MANIKLHDLSPAGSELFQDSESFLNELNAEELNNVNGGLLGITLTITITITITFTL	110	yes	18.63	NF000539.0	plantaricin: plantaricin C family lantibiotic	1.1e-05
WP_096537472	Nostoc linckia NIES-25	Nostoc	1	WP_096537472_5	5	MATIKIHDLNPAGCELFQDSESFLHELTDAELGVQGGFRTQSFTYCWPVSWTIPL	723	yes	16.66	none	none	none
WP_096559014	Nostoc sp. NIES-4103	Nostoc	1	WP_096559014_3	3	MANITLTELHIAGSELFQDSESFLNELNNVNSISGGFYGGHVSDASTLTKLAEAFVGVYSIGHIGYLAKSFSHSNSYSGY	4275	yes	31.06	none	none	none
WP_096559014	Nostoc sp. NIES-4103	Nostoc	1	WP_096559014_8	8	MANITLTELHTTGSELFQDSESFLNELNNLDSISGGDYSSGVSDFSTIIKLAEAFVDVYAINHIAWIAKSFSHSNDTHY	2729	yes	24.24	none	none	none
WP_096559014	Nostoc sp. NIES-4103	Nostoc	1	WP_096559014_6	6	MANITLSELHIAGSELFQDSESFLNELNNVDSISGGSYGSHVSDFSTLTKLAEAFVNVYGIGHITYLAKSFSHSDSYSYG	3511	yes	25.7	none	none	none
WP_096559014	Nostoc sp. NIES-4103	Nostoc	1	WP_096559014_4	4	MANITLSELHIAGSELFQDSESFLNELNNVDSISGGSYGSHVSDISTLTKLAEAFVNVYGIGHIAYLAKSFSHSDSYSGY	3129	yes	30.94	none	none	none
WP_096559014	Nostoc sp. NIES-4103	Nostoc	1	WP_096559014_1	1	MANITLTELHITGSELFQDYENFLNELSDVDYIYGGTDSYSNGISDISTLVKLAEAFVDVYAIGHIAWIAKSFSKA	2106	yes	38.84	none	none	none
WP_096559014	Nostoc sp. NIES-4103	Nostoc	1	WP_096559014_5	5	MANITLSELHIAGSELFQDSESFLNELNNVDSISGGSYGSHVSDISTLTKLAEAFVNVYGIGHIAYLAKSFSHSDSYSGY	3893	yes	29.36	none	none	none
WP_096559014	Nostoc sp. NIES-4103	Nostoc	1	WP_096559014_7	7	MIVLGIDLMANIIISELKLVDSENYLTEINEMDSMFVYGGDNYAFSQVINFTMNFLKFVVTIYAIHSITLLAKSFNTNSSNAYLPSIYF	1430	yes	25.19	none	none	none
WP_096569967	Sphaerospermopsis kisseleviana NIES-73	Sphaerospermopsis	1	WP_096569967_1	1	MASIKLSELQVAGSELFQDSESFLNEMSDANSVYGGGNDYVSDASTLTKLAEAFVNTYGIGHIGYLAKSYSDGYGYGY	1807	yes	47.87	none	none	none
WP_096569967	Sphaerospermopsis kisseleviana NIES-73	Sphaerospermopsis	1	WP_096569967_4	4	MASIKLSELQVAGSELFQDSESFLNEMSDANSVYGGGNDYVSDMSTLTKLAEAFVNTYGIGHIGYLAKSYSDKGYW	2397	yes	42.53	none	none	none
WP_096569967	Sphaerospermopsis kisseleviana NIES-73	Sphaerospermopsis	1	WP_096569967_3	3	MASIKLSELQVAGSELFQDSESFLNEMSDANSVYGGGNDYVSDMSTLTKLAEAFVNTYGIGHIAYLAKSYSEKWY	2687	yes	45.21	none	none	none
WP_096569967	Sphaerospermopsis kisseleviana NIES-73	Sphaerospermopsis	1	WP_096569967_2	2	MASIKLSELQVAGSELFQDSESFLNEMSDANSVYGGGNDYVSDMSTLTKLAEAFVNTYGIGHIGYLAKSYSDKGYW	2105	yes	45.66	none	none	none
WP_096569967	Sphaerospermopsis kisseleviana NIES-73	Sphaerospermopsis	1	WP_096569967_5	5	MASIKLSELQVAGSELFQDSESFLNEMSDVNSISVYGGYSSTVSDMSTLTKLAEAFVNTYGIGHIAYLAKSYSEKWY	2974	yes	40.46	none	none	none
WP_096569967	Sphaerospermopsis kisseleviana NIES-73	Sphaerospermopsis	1	WP_096569967_6	6	MARIIIADLHPIDSEVFINEVNNQEYQAVFGGVDGSSYQILNFGVKTLEFMLVIAAIDAISFLTTSFINKDYELTDRDFLLESMYNIQE	1367	yes	36.43	none	none	none
WP_096575011	Anabaenopsis circularis NIES-21	Anabaenopsis	1	WP_096575011_2	2	MANIILSELNAAGSQLFQGSESFLNDLSDVDAIASGSGYGGYGYDGFGLNKLIEGFVDVYAIQHVYGIAKSFSHGGYGVSGY	3516	yes	39.37	none	none	none
WP_096575011	Anabaenopsis circularis NIES-21	Anabaenopsis	1	WP_096575011_7	7	MANITLSELNAAGSQFFQDSESFLNDLSDVDAIATHGANGNSVSDFYGFNKLIEGFLDVYAIQHIFGIANSFSSKGGYGY	2427	yes	26.14	none	none	none
WP_096575011	Anabaenopsis circularis NIES-21	Anabaenopsis	1	WP_096575011_6	6	MANITLSELNVAGSQLFQDSESFLNDLSDVDLSAAHGGKNANSADYGYGSDSYISVFNKLIEGFVGVYAIQHIFSLAKSFSKSNY	2000	yes	26.84	none	none	none
WP_096575011	Anabaenopsis circularis NIES-21	Anabaenopsis	1	WP_096575011_4	4	MANITLSELNAAGSQFFQDSESFLNDLSDVDAIATHGADSNSNSYISDFYGFNKLIEGFVDVYAIQHVYGIAKSFSKGGYSNSQY	3149	yes	31.24	none	none	none
WP_096575011	Anabaenopsis circularis NIES-21	Anabaenopsis	1	WP_096575011_1	1	MARITISDLYLNNDEQHITELTAWEARTIEAGASTVTIDTSDLLQLQQNINDILQGVSNQLQQQRQQQQQQPNNRYGRRQPYDDYYAYY	4430	yes	43.2	none	none	none
WP_096575011	Anabaenopsis circularis NIES-21	Anabaenopsis	1	WP_096575011_5	5	MALMDWKKSSSVIIESMRVSHIFTGNDEMAKIIINDLSSGDLDSYLTEVNELDSLSIYGGESEFQQILNFAYNLLNFVLSAYAIYNISSIAKSFKITRNKTTRSVFSLF	1643	yes	28.16	none	none	none
WP_096575011	Anabaenopsis circularis NIES-21	Anabaenopsis	1	WP_096575011_3	3	MANITLSELNAAGSQFFQDSESFLNDLSDVDAIAAHGADSNSNSYVSDFYGFNKLIEGFVDVYAIQHIYGIAKSFSHGGYGISAA	2782	yes	33.49	none	none	none
WP_096576751	Aulosira laxa NIES-50	Aulosira	1	WP_096576751_1	1	MADIKIHDIVITGAELFLDSESFMNDLGDDEMNIRGGDWSTLSKACATVGKDEWSTFSGGCRNDDVPEFLQ	388	yes	31.86	PF09516.10	CfrBI restriction endonuclease	4.6e-06
WP_096576757	Aulosira laxa NIES-50	Aulosira	1	WP_096576757_1	1	MADIKIHDIVITGAELFLDSESFMNDLGDDEMNIRGGDWSTLSKACATVGKDEWSTFSGGCRNDDVPEFLQ	1389	yes	31.86	PF09516.10	CfrBI restriction endonuclease	4.6e-06
WP_096579222	Anabaenopsis circularis NIES-21	Anabaenopsis	1	WP_096579222_1	1	MNYQDSALNSVGSELFIDSENFLQDLADTDAMNLQGGYGPGIEKLLEFGINVYALNNIVSIAKTFSGAAGGVLGNGGAGGAGGAGAGGAGAGGD	226	yes	58.07	none	none	none
WP_096580419	Aulosira laxa NIES-50	Aulosira	1	WP_096580419_3	3	MSNIKISEILPAGSELFQDSESFLNELTNEEILDTKGGRLPASLVTNSFISINSQINTIITANSNSINANTIGNVNTRIA	2230	yes	20.25	none	none	none
WP_096580419	Aulosira laxa NIES-50	Aulosira	1	WP_096580419_1	1	MASIKISELRPAGSELFQDSESFLNDLNSQEMEIIGGRILFISRAGSVAISISAQTVVGNTVNANTFGNLNTVAV	2682	yes	38.71	PF03478.18	Protein of unknown function (DUF295)	1.8e-06
WP_096580419	Aulosira laxa NIES-50	Aulosira	1	WP_096580419_2	2	MTTINIYDLSILGLDLFQDSETFLNELTEDELNYISGGFLDDVFDVLQLAIIPQENQANINGQTINAFTQNNFNTAP	1453	yes	32.17	PF10439.9	Bacteriocin class II with double-glycine leader peptide	2.8e-05
WP_096589596	Calothrix sp. NIES-2098	Calothrix	1	WP_096589596_8	8	MATIRIEQLSAGFELIADEETFLDELTDSDLDLNKGGITPVITSLIVFSAGYSVGRAISEIFK	2311	yes	33.16	none	none	none
WP_096589596	Calothrix sp. NIES-2098	Calothrix	1	WP_096589596_7	7	MATIRIEQLSAGFELIADEETFLDELTDNDLDLNKGGITPVITSLIVFSAGYGVGKAISQIFS	3183	yes	34.58	none	none	none
WP_096589596	Calothrix sp. NIES-2098	Calothrix	1	WP_096589596_4	4	MAAITVHDLRPAGADLFAGSENFMSDLADSELNTVNGGLTPVVIWGVAITSEYVIGAFAVGVGAGIYTAVK	2933	yes	50.45	PF04369.13	Lactococcin-like family	3.3e-06
WP_096589596	Calothrix sp. NIES-2098	Calothrix	1	WP_096589596_3	3	MAAIAIHDLRPAGADLFAGSENFMSDLVDSELNAVNGGISPLVIWGVAITSEYVISAFGVGVGAGIYTALK	2069	yes	50.68	none	none	none
WP_096589596	Calothrix sp. NIES-2098	Calothrix	1	WP_096589596_10	10	MSRLKVSDLNSAGSEFFQDSETFLLDLKDDELCMQYGGIFITTNISVINVPISEDIFAPSISLIR	1557	yes	23.58	none	none	none
WP_096590410	Calothrix sp. NIES-2098	Calothrix	1	WP_096590410_2	2	MADIKINDIKLNVAELFLDSESFLNELSNDELNLRGGMQIASTKSYYCGTVTTNEFSTDSVGCRTNPVAK	1316	yes	21.05	none	none	none
WP_096590413	Calothrix sp. NIES-2098	Calothrix	1	WP_096590413_2	2	MADIKINDIKLNVAELFLDSESFLNELSNDELNLRGGMQIASTKSYYCGTVTTNEFSTDSVGCRTNPVAK	369	yes	21.05	none	none	none
WP_096620064	Calothrix sp. NIES-3974	Calothrix	1	WP_096620064_1	1	MASIKVAELRPAGSELFQDSESFMNELNEMDTLSVHGGYDSGYGVFTNYLFLGYKDHLAYDINKYAIGVIAGLASKFNFSGYYYPSYY	2407	yes	30.87	none	none	none
WP_096620064	Calothrix sp. NIES-3974	Calothrix	1	WP_096620064_2	2	MARIEVQDLHILRSDAKSFINEISDLDASHIHGGRNRLGRREIFLLNLFSIWMEGFITLAAMDYIFRLASNFSPTNSPRRRFPFP	1673	yes	26.12	none	none	none
WP_096622718	Streptomyces sp. WZ.A104	Streptomyces	1	WP_096622718_1	1	MQNVTEKDLFDGYTAYTSAEELGLHDGKEAAPAFSPTIPWAIRATIISARSSQQCAAALGSLAAKTVENKC	3209	yes	60.19	none	none	none
WP_096664869	Dolichospermum compactum NIES-806	Dolichospermum	1	WP_096664869_5	5	MANVTISDLHNAHGKKFIINLDDMDSISIFGGEYNDVHQILNYGVKALEFVLAIYAIDTISLLTRAFKK	1274	yes	29.72	none	none	none
WP_096664869	Dolichospermum compactum NIES-806	Dolichospermum	1	WP_096664869_2	2	MASITLSQLNVTGSELFQDSESYLNDLNDAASVSINGGGSGFSDFGVYGDFGVKYLEFLVDGYAIASIKHIAKSFSNDSHTGGGYGY	1676	yes	39.42	none	none	none
WP_096679519	Nostoc sp. NIES-2111	Nostoc	1	WP_096679519_4	4	MASIAISDIRPVGHELLFDSESYMTELNSNELDRIVGGTDPISLGVAAFVIVVGAGLTGFAIGSALK	1061	no	32.08	NF000539.0	plantaricin: plantaricin C family lantibiotic	1.8e-05
WP_096679519	Nostoc sp. NIES-2111	Nostoc	1	WP_096679519_2	2	MASIAISNILPVGHDLLSDSENFMTDLNENELERVVGGTEPVTAAIAVSIGVAAAGAFLTGLYFGLK	1344	no	35.32	PF14989.6	Coiled-coil domain containing 32	5.3e-05
WP_096681247	Nostoc sp. NIES-2111	Nostoc	1	WP_096681247_4	4	MAFIAVKELQNTGAELFQDSESFLSELNNVDTTAVHGGGDGYSSATNGVLDFGLKGFEFGAITFGVDAIGHLVKSFSDNGGWY	2182	yes	50.24	none	none	none
WP_096681247	Nostoc sp. NIES-2111	Nostoc	1	WP_096681247_6	6	MAFIAVKELQNTGAELFQDSESFLSELNNVDTTAVHGGGDGYSSATNGVLDFGLKGFEFGAITFGVDAIGHLVKSFSSNGTYR	1807	yes	47.28	none	none	none
WP_096681247	Nostoc sp. NIES-2111	Nostoc	1	WP_096681247_8	8	MASINLTELQTTGSELFQDSESFLQELNNMDNSVYGGGDGYSSATNFVLAYGIKGFEFGAITFGIDAIGHLVKSFSSHDGY	1436	yes	40.58	none	none	none
WP_096681247	Nostoc sp. NIES-2111	Nostoc	1	WP_096681247_2	2	MAFIAVKELQNTGAELFQDSESFLSELNNVDTTAVHGGGDGYSSATNGVLDFGLKGFEFGAITFGVDAIGHLVKSFSDNGGWY	2932	yes	50.24	none	none	none
WP_096681247	Nostoc sp. NIES-2111	Nostoc	1	WP_096681247_5	5	MAFIAVKELQNTGAELFQDSESFLSELNNVDATAVHGGGDGYSSATNGVLDFGLKGFEFGAITFGIDAIGHLVKSFSSNGTYR	3306	yes	47.59	none	none	none
WP_096681247	Nostoc sp. NIES-2111	Nostoc	1	WP_096681247_3	3	MAFIAVKELQNTGAELFQDSESFLSELNNVDTTAVHGGGDGYSSATNGVLDFGLKGFEFGAITFGVDAIGHLVKSFSDNGGWY	2557	yes	50.24	none	none	none
WP_096688632	Calothrix sp. NIES-4071	Calothrix	1	WP_096688632_5	5	MATINISDLRPAGSDLFSNSESYMNELGDSELDIINGGFGLLPLLFSAMVIFAPPAY	2680	yes	22.3	none	none	none
WP_096688632	Calothrix sp. NIES-4071	Calothrix	1	WP_096688632_2	2	MASIAIFDLRPAGSDLFSDSEGYMNELGDGEIGTIQGGFSSWKCVIWSARFSVVGSIVASLVVTTARAAN	2285	yes	26.1	none	none	none
WP_096688632	Calothrix sp. NIES-4071	Calothrix	1	WP_096688632_1	1	MATIKISDLRPTGSELFSDSEGYMNDLGESEFDAIYGGLTPALIISAARLGYAGARSSQQCAMGIAGAAGAVERWFKRN	1586	yes	40.78	none	none	none
WP_096688632	Calothrix sp. NIES-4071	Calothrix	1	WP_096688632_3	3	MATINISDLRPTGSELFSDSEGYMSELSDNELISVNGGILTSPVCAAVVSRIVSPRLTREVARYLKRPNN	2017	yes	24.71	PF10439.9	Bacteriocin class II with double-glycine leader peptide	2.8e-05
WP_096688632	Calothrix sp. NIES-4071	Calothrix	1	WP_096688632_7	7	MASIKIFNLYPAGSELFKDSENFMTELVDSELGSINGGIGIVYNSPWCRPTIYSPRCKPSLPRSIATTLPKAV	1130	yes	14.14	PF05251.12	Oligosaccharyltransferase subunit 5	3.3e-06
WP_096689510	Calothrix sp. NIES-4071	Calothrix	1	WP_096689510_2	2	MNKVVLEDWTMASIKISLLRPAGFDLFEDSESFLNDLSNKETETVVGGAALTEIISYAVAYTYIIDTPAVKNVETQFVQTEVTVSVGVGLQTYSVLSPA	1841	yes	25.48	none	none	none
WP_096689510	Calothrix sp. NIES-4071	Calothrix	1	WP_096689510_5	5	MAFLKISDLRPAGSEFFQDSESYLNELNEQEISATVGGGAVGVISQFSLSIGVSIATLSAISNFG	2912	yes	17.21	NF000539.0	plantaricin: plantaricin C family lantibiotic	3.2e-07
WP_096689510	Calothrix sp. NIES-4071	Calothrix	1	WP_096689510_6	6	MAFLKISDLRPAGSEFFQDSESYLNELNEQEISATLGGGVVSVISQATVSVGISILTASLISNF	3172	yes	11.66	NF000539.0	plantaricin: plantaricin C family lantibiotic	4.7e-06
WP_096689510	Calothrix sp. NIES-4071	Calothrix	1	WP_096689510_1	1	MFVKVNQLHPVGSELFNDSESYLNELTENEVREVQGGYKYSAVTSDIYINSQITISQGISLATLSAVSNAPLVVNAFNN	2453	yes	32.34	NF000539.0	plantaricin: plantaricin C family lantibiotic	2.6e-06
WP_096689510	Calothrix sp. NIES-4071	Calothrix	1	WP_096689510_3	3	MPNIRILELRQNGHELFEDSESFLVELTNQELSMVNGGSSVSQVTYSVGYEYLPTDSNLTFVEPDANSDLLSLSVAI	2144	yes	19.21	PF15541.6	Bacterial toxin 4	4.1e-05
WP_096689510	Calothrix sp. NIES-4071	Calothrix	1	WP_096689510_4	4	MSSIKISNLGLVGSDLLVDSESYLEELNDAEIKYTLGGVVVSQATVTAGFLVVPEYQNERNYQQYWAPAYFNVDSYFHNITYSIKSSIIDIFST	1484	yes	18.42	none	none	none
WP_096728455	Nostoc carneum NIES-2107	Nostoc	1	WP_096728455_2	2	MANIKVNELLHLSLTGSELFNDSESFLTELSDETEQMGVIGGACNCCWFTSWSKYCKTV	3641	yes	17.46	none	none	none
WP_096728455	Nostoc carneum NIES-2107	Nostoc	1	WP_096728455_1	1	MANINVNDLLHLNLIGSDLLNDSESFLTELSDESEQMGIIGGACKLLSLICCNCTYVTEHVIE	3953	yes	22.27	none	none	none
WP_096730381	Nostoc carneum NIES-2107	Nostoc	1	WP_096730381_1	1	MANIKVSELSPAGSELFQDSESFLNDLNDMDTTSVHGGEGANYVPYLQFGSKLLEYSVVGLGISTITSLVGSFSSTGTGVGGGVGTDNGVGGGTITF	2434	yes	48.81	none	none	none
WP_096730381	Nostoc carneum NIES-2107	Nostoc	1	WP_096730381_2	2	MANIKVSELSPAGSELFQDSESFLNDLNDMDTTSVHGGEGANYVPYLQFGSKLLEYSVVGLGITTIASLVGTFSSTGNGVGGGIGGGTTI	2000	yes	45.94	none	none	none
WP_096730381	Nostoc carneum NIES-2107	Nostoc	1	WP_096730381_4	4	MNRIVIFDLHQSGSNEINHSESFIEDVTEIDSMCIHGGEGYAFSEFLNFGVKVLEYALIGFAISSIVSLVQMFLAPRQNQNSSLPTIYPPIS	1591	yes	16.19	PF13273.6	Protein of unknown function (DUF4064)	2.4e-06
WP_096730381	Nostoc carneum NIES-2107	Nostoc	1	WP_096730381_3	3	MANINIANLHQRDNLDYLDELHNSEINHVIGGAVTIAVPVTESNQQFLDLFHTLNDPNRGPITINFGNSASVSNPVISNPFDKGINPF	4533	yes	25.04	PF04604.13	Type-A lantibiotic	4.4e-06
WP_097866484	Streptomyces sp. rh34	Streptomyces	1	WP_097866484_1	1	MTGRQFPFMERKLMQNVTEQDLFDGYTAYTSAEELGLHDGKDAAPAFSPTIPWAIRATIISARSSQQCAAALGSLAAKTVENKC	3041	yes	54.95	none	none	none
WP_099068319	Nostoc linckia z15	Nostoc	1	WP_099068319_4	4	MATIKIHDLSPAGSELFQDSESFLNELTDAELGVHGGLRAESVSVTVSVTLTVTYSWSWTW	1726	yes	30.8	none	none	none
WP_099068319	Nostoc linckia z15	Nostoc	1	WP_099068319_2	2	MATIKIHDLSPAGSDLFQDSESFLNELTDEELGVHGGRALASVSISVTVTVTYSWTWTWAL	1449	yes	31.23	none	none	none
WP_099068319	Nostoc linckia z15	Nostoc	1	WP_099068319_5	5	MANIKLHDLSPAGSELFEDSESFLNELNTEELTHVNGGLLSITITITITITVTLAKAA	335	yes	27.59	PF10439.9	Bacteriocin class II with double-glycine leader peptide	7.3e-07
WP_099068319	Nostoc linckia z15	Nostoc	1	WP_099068319_6	6	MATIKIHDLNPAGSELFQDSESFLNELTDAELGLQGGLKTQSFTYCWPITWTILL	1189	yes	22.89	none	none	none
WP_099068319	Nostoc linckia z15	Nostoc	1	WP_099068319_3	3	MATIKINNLSPVGSELFQDSESFLNELTDTELATRGGLLSITLPLTPTLSLTWTYTVTAVAA	957	yes	30.93	none	none	none
WP_099068319	Nostoc linckia z15	Nostoc	1	WP_099068319_7	7	MANIKLHDLSPAGSELFEDSESFLNELNAEELNNVNGGLLGITLTITVTITITITL	109	yes	19.69	NF000539.0	plantaricin: plantaricin C family lantibiotic	1.2e-05
WP_099071810	Nostoc linckia z15	Nostoc	1	WP_099071810_2	2	MANITLSELYVSGSELFAGTESFLNDLSDADSISGGDQWSGFSDISTLTKLAEAYVDTYAIGHIAFIAKSYSSSAVG	1714	yes	34.94	none	none	none
WP_099071810	Nostoc linckia z15	Nostoc	1	WP_099071810_6	6	MANITLSELYVSGSDLFVGTESFLNDLNDADSISGGNYYNFSDISTLTKLAEAYVDTYAIGHVTFVAKSYSNGTYY	2830	yes	18.96	none	none	none
WP_099071810	Nostoc linckia z15	Nostoc	1	WP_099071810_1	1	MANITLSELYVSGSDLFAGTESFLNDLSDADAISGGNYAGFSDISTLTKLAEAYVDTYAIGHVTFVAKSYSNGTYY	2082	yes	38.15	none	none	none
WP_099071810	Nostoc linckia z15	Nostoc	1	WP_099071810_3	3	MANITLSELYVSGSELFVGTESFLNDLSDADAISGGNYGGFSDISTLTKLAEAYVDTYAIGHITFVAKSYSNGTYY	2439	yes	34.34	none	none	none
WP_099700413	Chroococcales cyanobacterium IPPAS B-1203	Chroococcales	1	WP_099700413_4	4	MASIKIFELTPAGTELFQDTESFLNELNDQESLMISGGDGSNVNISNISQVTISVGISIKTFSVVSQVKFDNRRGR	3008	yes	29.5	NF000539.0	plantaricin: plantaricin C family lantibiotic	2.9e-06
WP_099700413	Chroococcales cyanobacterium IPPAS B-1203	Chroococcales	1	WP_099700413_2	2	MASIKIFELTPAGAELFQDTESFLNELNDQESLMISGGNGSDLNISNISQVTVSVGISIKSVSVVSQVKGNIYFGKRNRR	1916	yes	32.73	NF000539.0	plantaricin: plantaricin C family lantibiotic	1.5e-06
WP_099700413	Chroococcales cyanobacterium IPPAS B-1203	Chroococcales	1	WP_099700413_1	1	MACIKISELQPAGNELFQDKESYLDELNEKETLFIIGGKKKGGDLDISVLTVYTESIGISLQTFSVVTQVKKIKIKIKY	1242	yes	35.67	none	none	none
WP_099700413	Chroococcales cyanobacterium IPPAS B-1203	Chroococcales	1	WP_099700413_3	3	MSCLNISDLSVTGLELFQDAESFMNELSDREIENITGGWFSFLTDDFMPTTSNLVVETVVKTRVVSVVTRSVWVKTKGVKNYGVSHTHKTIISVRR	1952	yes	30.12	NF000539.0	plantaricin: plantaricin C family lantibiotic	2.5e-05
WP_102939117	Cylindrospermopsis raciborskii C04	Cylindrospermopsis	1	WP_102939117_1	1	MANITISDLRTTDLRLSDSENYLNDLTDDELKTYGGSKNLSSSYICRHYGSKSCAWAKAKEKGLW	7161	no	3.06	none	none	none
WP_103136595	Nostoc sp. CENA543	Nostoc	1	WP_103136595_2	2	MAFIAINELRATGAELFQDSESFLNELNNLDNSVHGGYSGAYSNSTGTVLGIAEKGFEFGVITVGIDAIGHLAKSFSDDKAGYYY	2304	yes	51.91	none	none	none
WP_103136595	Nostoc sp. CENA543	Nostoc	1	WP_103136595_3	3	MASINLTELQVTGAQLFQDSESFLNDLSNLDDTVHGGNYAYSSSTGAVLGIVEKGFEFGVITIGIDAIGHLAKSFSDNKVYY	1527	yes	45.04	none	none	none
WP_103136595	Nostoc sp. CENA543	Nostoc	1	WP_103136595_1	1	MAFIAINELRATGAELFQDSESFLNELNSVDNSVHGGYDGYSSSTGTVLGIAEKGFEFGVITVGIDAIGHLAKSFSDNKPGWY	1914	yes	53.74	PF09340.10	Histone acetyltransferase subunit NuA4	5.6e-06
WP_103138325	Nostoc sp. CENA543	Nostoc	1	WP_103138325_3	3	MASIAINELKFAGADLLVDSESFLNDLEDRELTAAIGGITPVVTFTAASLGSVSVWGVSFGTGFALGTFAGGAVIGYVASR	1839	yes	45.49	PF11981.8	Domain of unknown function (DUF3482)	0.0012
WP_103138325	Nostoc sp. CENA543	Nostoc	1	WP_103138325_4	4	MAIVISDLNSEYNLLFDSESYLNEVTDAELSGAVGGATPATWGAYLLTTLVIGGSGAAFGALVYKLTH	1593	yes	38.52	NF000539.0	plantaricin: plantaricin C family lantibiotic	2.7e-06
WP_103138325	Nostoc sp. CENA543	Nostoc	1	WP_103138325_5	5	MAKITISDLNPSDYSLTELSAEEMAAIQGGGFLGKLIGGIVGGVAGFFIAGPAGVFSGISAGSTLGDAVEEVFF	3010	no	29.62	PF16934.5	Two-component Enterococcus faecalis cytolysin (EFC)	1.4e-07
WP_103811802	Streptomyces sp. Ru62	Streptomyces	1	WP_103811802_2	2	MMNETAELATGFDAYTDLEELAAAVEASTEAKTPGFSITPTFSLTGQH	139	yes	39.17	none	none	none
WP_104258544	Rathayibacter tritici	Rathayibacter	1	WP_104258544_1	1	MSKNEKIMDLVSGYDTYAASSELGDISAADAPATTWYCVAATVTMLSAATYEATC	58	yes	30.31	none	none	none
WP_104258544	Rathayibacter tritici	Rathayibacter	1	WP_104258544_2	2	MTKTNAIMDLVSGYESYSSAADIGVSAATDAPATTAYCAAATVTWLTGLAVSKTIDDGC	245	yes	24.5	none	none	none
WP_104291723	Rathayibacter sp. AY1A2	Rathayibacter	1	WP_104291723_4	4	MTTISTDAQSADLTALAGAHDTFATVDELGSDAATEAPATTPLCVGIIVGATLGAGC	74	yes	40.33	PF09237.11	GAGA factor	8e-06
WP_104291723	Rathayibacter sp. AY1A2	Rathayibacter	1	WP_104291723_2	2	MSTITGQTVQSADLAELATAHDTFTAADEIGTDAASEAPATTPFCAGVIIGVTLTAGC	373	yes	50.85	PF09237.11	GAGA factor	6.9e-07
WP_104296401	Rathayibacter toxicus	Rathayibacter	1	WP_104296401_5	5	MNELMSGYSRYTSAAAYGSSLAGDAPATTSPACAVGTIVILTVGVTC	1130	yes	8.35	none	none	none
WP_104387267	Cuspidothrix issatschenkoi CHARLIE-1	Cuspidothrix	1	WP_104387267_4	4	MAKLIIDDLQPTTEKISIQEISYLESVSLVGGYSNNFQELVRFGIKSMEFILLAYAIDSIYALGTSFNNS	1240	yes	24.78	none	none	none
WP_104387267	Cuspidothrix issatschenkoi CHARLIE-1	Cuspidothrix	1	WP_104387267_1	1	MASIKLSQLQVPGSELFQDSESFLNEMNDVDTITIQGGSGSGIHDLVEYSIKGKEFVLLGFAIDNVVSLAKSFSRGYDYSHG	1618	yes	44	PF10443.9	RNA12 protein	5.9e-06
WP_104899482	Nostoc sp. Peltigera membranacea cyanobiont N6	Nostoc	1	WP_104899482_4	4	MATIRIEQLSAGFELIADEETFLDELTDSDLDFTKGGTSPVIVTTLIAFSAGYGVGRAVTELFK	2037	yes	28.51	NF000539.0	plantaricin: plantaricin C family lantibiotic	1.3e-05
WP_104899482	Nostoc sp. Peltigera membranacea cyanobiont N6	Nostoc	1	WP_104899482_2	2	MASIAIIDLRPAGADLFAGSENFMSDVVDYELNTVNGGLTPFVIWGVAIASEYVIGAFAVGVGAGVYTALK	1758	yes	48.13	none	none	none
WP_104899482	Nostoc sp. Peltigera membranacea cyanobiont N6	Nostoc	1	WP_104899482_7	7	MSKITISDIAINPDDESLVDELTEQLINGIFGGWSITITITIKF	1335	yes	21.27	none	none	none
WP_105222244	Gloeocapsopsis sp. AAB1 = 1H9	Gloeocapsopsis	1	WP_105222244_2	2	MASIKIFELTPAGAELFQDTESFLNELNDQESLMISGGGGSDLNISNISQVTVSIGISLKSVSVVSQVKSNFYFGKREQKK	1943	yes	32.1	NF000539.0	plantaricin: plantaricin C family lantibiotic	2.5e-06
WP_105222244	Gloeocapsopsis sp. AAB1 = 1H9	Gloeocapsopsis	1	WP_105222244_3	3	MSCLKISDLSVTGLELFQDAENFLNELSDREIENITGGWFSFITDDFMPTTSNLVLETVVKTRVVSAITKSVRVKTKGVKNYGISHTHKTIISIRC	1906	yes	27.38	NF000539.0	plantaricin: plantaricin C family lantibiotic	8.3e-06
WP_105222244	Gloeocapsopsis sp. AAB1 = 1H9	Gloeocapsopsis	1	WP_105222244_1	1	MASIKISELKPAGNELFQDEESFLDELNERETLFITGGKKKGDNLDISVLTVYTESIGISLQTFSVVTQVKKIKIKIKY	1226	yes	35.84	none	none	none
WP_106115031	Actinopolyspora mortivallis	Actinopolyspora	1	WP_106115031_4	4	MFSVQFVNGKEKLMEKSAAIMELVSNYNTYADAGELNVTTASDAPATSPACAVSAAASAASSWYCVSAASGASVSATAEANC	70	yes	14.85	none	none	none
WP_106218514	Cyanosarcina cf. burmensis CCALA 770	Cyanosarcina	1	WP_106218514_1	1	MANITIANLQPAGLDLFYDSDNYMKDLTEAELGIQGGGFRTWLSYLGSLAWDLAKTFVSPEDRAEISKDLEGLIPS	1517	yes	41.04	none	none	none
WP_106237513	Pleurocapsa sp. CCALA 161	Pleurocapsa	1	WP_106237513_1	1	MGIKINELSPVGANLFADSESFMGNIRSLSEDELKVSGGGGYGHGHSGSGSGKSKSKSKSKSKGSGSGHYGCGCGYGC	1327	yes	18.21	PF12114.8	Period protein 2/3C-terminal region	9.9e-05
WP_106240815	Pleurocapsa sp. CCALA 161	Pleurocapsa	1	WP_106240815_1	1	MAEIKLSELRPAGSELLQDSENFLNELSDREIENVVGGDTIASVASQNSISVGTVNSITDVGQTQTLVTF	1797	yes	44.22	NF000539.0	plantaricin: plantaricin C family lantibiotic	9.4e-08
WP_106240815	Pleurocapsa sp. CCALA 161	Pleurocapsa	1	WP_106240815_3	3	MANIKLSELSPAGSELFQGHEDFLNELSDRELSDVLGGGASAATVSGKTMVSGISSGEFDYANYGNFNYAKIGNFEALQIKIKPTLLHHSFSTIIF	1384	yes	39.78	NF000539.0	plantaricin: plantaricin C family lantibiotic	4.6e-06
WP_106240815	Pleurocapsa sp. CCALA 161	Pleurocapsa	1	WP_106240815_2	2	MAEIKLSELRPAGSELLQDSENFLNELSDREIENVVGGDTINSVASQNSVSVGTVNTITDVGQTQTFVTF	2313	yes	40.54	NF000539.0	plantaricin: plantaricin C family lantibiotic	1.3e-08
WP_106240815	Pleurocapsa sp. CCALA 161	Pleurocapsa	1	WP_106240815_4	4	MAQLKITELNPAGSELFQDSENFLEELSDRELNLMAGGMDINSVVTQNSASVGSIQTATVVGISQTNVSVQISNVNASNVNVNASNVNITAF	2028	yes	38.8	NF000539.0	plantaricin: plantaricin C family lantibiotic	1.1e-07
WP_106289349	Merismopedia glauca CCAP 1448/3	Merismopedia	1	WP_106289349_2	2	MSTINIADLQVSGSDLFADSESYLNELDDSSFAASQIQGGFTPVPVATAIILFSAATRIAKEIMTPDCPPPPPFCE	1287	yes	23.46	none	none	none
WP_106289349	Merismopedia glauca CCAP 1448/3	Merismopedia	1	WP_106289349_3	3	MATILINDLNPAGYSLFTDDESYLRDLSSDDELSISGGATTSVTWTIASSGWCVATIVTISLVDITRRLL	1731	yes	19.86	PF09113.10	Peptide-N-glycosidase F, C terminal	3.9e-06
WP_106300787	Chamaesiphon polymorphus CCALA 037	Chamaesiphon	1	WP_106300787_3	3	MATISIGNLNSLGGDLLIDEESYLDNLSDDLTVSVKGGWTPTVTASPASPQISAASVATFIASAALTYNITRSFGK	1821	yes	27.29	none	none	none
WP_106300787	Chamaesiphon polymorphus CCALA 037	Chamaesiphon	1	WP_106300787_1	1	MATISISDLSPVGLDLFSDFENYLDELSGDDLTKITGGSTPFCASIVATAISAVSGAIVSGIVGYTGRK	2107	yes	34.45	NF000539.0	plantaricin: plantaricin C family lantibiotic	9.9e-06
WP_106300787	Chamaesiphon polymorphus CCALA 037	Chamaesiphon	1	WP_106300787_4	4	MTTIAIFDLPTNGLDLFSDSENYMTELNNKDLVDINGGIGLIGASLVVTAISAYTALNQFLYGGNNGLNNPRF	3923	yes	23.81	NF000539.0	plantaricin: plantaricin C family lantibiotic	2.8e-06
WP_106331017	Actinoplanes italicus	Actinoplanes	1	WP_106331017_2	2	MEKLNTENLVDGYTEYTSAEELELMDAGANAPAFSPAVSPLVPILIRASIIAASSSTRCAESIARATGGVSKTIKEVC	2817	no	48.48	none	none	none
WP_106371152	Chlorogloea sp. CCALA 695	Chlorogloea	1	WP_106371152_5	5	MATIAIYNLRAPGAELFMDSESYLQELTDTEIDTTKGGLFWVGVAVGILISARYC	1814	yes	25.2	NF033215.1	BlpC_Streptocco: quorum-sensing system pheromone BlpC	4.7e-07
WP_107115831	Streptomyces globisporus C-1027	Streptomyces	1	WP_107115831_1	1	MQNVTEKDLFDGYTAYTSAEELGLHDGQEAAPAFSPTIPWAIRATIITARSSQQCAAALGSLAAKTVENKC	3146	yes	57.82	none	none	none
WP_107777750	Nocardioides sp. CF167	Nocardioides	1	WP_107777750_1	1	MNTRDLMEGFVAYAEAEELNVDAMVDAPATTVPCTVASFATGYFSC	5	yes	34.87	none	none	none
WP_109003510	Streptomyces rishiriensis	Streptomyces	1	WP_109003510_2	2	MKIENPAEALVGGYRTYTDGDQVAQVAGAEGPEATASITTATPVITTTTLIFDC	89	yes	54.22	none	none	none
WP_109013279	Nostoc commune NIES-4072	Nostoc	1	WP_109013279_1	1	MATINISDLRPTGSDLFSDSESYMSELGDNELVKVNGGSTLICFRIGYAAARSSQQCAAGIAGAAGAVKRWWDNRK	1399	yes	37.55	NF000539.0	plantaricin: plantaricin C family lantibiotic	2.3e-05
WP_109497443	Streptomyces sp. Act143	Streptomyces	1	WP_109497443_2	2	MNTTDTLLAGYAAYTSADEIAAAQDGGAPEISPVSLSIAVSIAESSYACSAGLSMSVGVTVGKGC	6580	yes	49.2	none	none	none
WP_109497443	Streptomyces sp. Act143	Streptomyces	1	WP_109497443_3	3	MNTTDTLLAGYAAYTSADEIAAAQDGGAPEISPVSLSIAVSIAESSYACSAGLSMSVGVTVGKGC	6201	yes	46.82	none	none	none
WP_109595189	Actinoplanes xinjiangensis	Actinoplanes	1	WP_109595189_2	2	MEQIETVMELVANYEAYTTGAEELAVSAAADAPATSAPCGAAGVSWIVSQFSGKTISEGC	350	yes	52.65	none	none	none
WP_109595189	Actinoplanes xinjiangensis	Actinoplanes	1	WP_109595189_5	5	MSNHIENTEIVDLVAQYETYAEANELNLSAASDAPATSPVCAASAASSTWCAAGASAVSGATYEFVC	679	yes	45.48	PF12361.8	Duffy-antigen binding protein	2.2e-05
WP_109595189	Actinoplanes xinjiangensis	Actinoplanes	1	WP_109595189_1	1	MDKNTEIVDLVAQYETYAEANELNLSAASDAPATSPVCAASAASSTWCAAGASAVSGATYEFVC	85	yes	55.14	PF08015.11	Fungal mating-type pheromone	7.3e-07
WP_109595189	Actinoplanes xinjiangensis	Actinoplanes	1	WP_109595189_4	4	MEKSENLSELIEGYLVYSETDELNVAAAAEAPATTAPCAAAATASWMVSQFSGKTIAEGC	921	yes	47.06	none	none	none
WP_114054648	Streptomyces globosus	Streptomyces	1	WP_114054648_1	1	MQNIENVEIMELVGGFEAYAQAAELNFEASADAPAITPTLTTIAYTKVTVAGTAASIKWTC	6467	yes	47.42	PF15493.6	Domain of unknown function, YrpD	9.4e-07
WP_114082527	Nostoc sp. ATCC 53789	Nostoc	1	WP_114082527_3	3	MASIALSQLNTTGSELFQDSESFLNDLNNVDSITIYGGSNGGDVSSVGEGIDPLLAYGIKGQEFALLAFGASLTAHIVKSFSDTDPWI	2370	yes	43.46	none	none	none
WP_114082527	Nostoc sp. ATCC 53789	Nostoc	1	WP_114082527_6	6	MASIALSQLNTTGSELFQDSESFLNDLNNVDSITVYGGGNNISSVASGLGPLLAYGVKGQEFALLGFGASLTAHIVKSFSDVDTHF	3138	yes	36.47	none	none	none
WP_114082527	Nostoc sp. ATCC 53789	Nostoc	1	WP_114082527_2	2	MASIALSQLNTTGSELFQDSESFLNDLNNVDSITIYGGSNGGDVSSVGEGIDPLLAYGAKGQEFALLAFGASLTAHIVKSFSDVDTHF	1983	yes	45.38	none	none	none
WP_114082527	Nostoc sp. ATCC 53789	Nostoc	1	WP_114082527_4	4	MASIALSQLNTTGSELFQDSESFLNDLNNVDSITVYGGGNDVSSVADGLDPLLAYGIKGQEFALLAFGASLTAHIVKSFSDTDPWI	3519	yes	42.74	none	none	none
WP_114082527	Nostoc sp. ATCC 53789	Nostoc	1	WP_114082527_5	5	MASIALSQLNTTGSELFQDSESFLNDLNNVDSITVYGGGNDVSSVAEGIDPLLAYGIKGQEFALLAFGASLTAHIVKSFSDSDTHF	2757	yes	41.71	none	none	none
WP_114082527	Nostoc sp. ATCC 53789	Nostoc	1	WP_114082527_7	7	MSRITISDLHTDDSEGLLIDISNIDYISIYAGADDDLTQILNYGLKNLQFALLAFTIHEIADLAKSFNTQ	1458	yes	23.57	none	none	none
WP_115965582	Rhodococcus sp. OK269	Rhodococcus	1	WP_115965582_2	2	MANARDLIANYSTYTSALEINHSAAADTTARTSPACISAASAISAVSIDNTFDHSC	2388	yes	18.05	PF16934.5	Two-component Enterococcus faecalis cytolysin (EFC)	2.8e-06
WP_115965582	Rhodococcus sp. OK269	Rhodococcus	1	WP_115965582_3	3	MANARDLIANYSTYTSALEINHSAAADTTARTSPACISAASAISAVSIDNTFDHSC	2148	yes	17.25	PF16934.5	Two-component Enterococcus faecalis cytolysin (EFC)	2.8e-06
WP_120754718	Streptomyces klenkii	Streptomyces	1	WP_120754718_1	1	MQNVTEKDLFDGYTAYTSAEELGLYDGKDAAPAFSPTIPWAIRATLITARSSQQCAAAIGSFTARTIESKC	2933	yes	65.7	PF16934.5	Two-component Enterococcus faecalis cytolysin (EFC)	3e-06
WP_121024930	Streptomyces sp. 3212.4	Streptomyces	1	WP_121024930_1	1	MNDIELAAGFDTYADVNEMADEVTPDEAPSPQTIVSLSVVASIKWSC	160	yes	39.98	none	none	none
WP_122818055	Nocardioides sp. 603	Nocardioides	1	WP_122818055_9006	9006	MTTQDLIAGYASYTDATQLSGSEGDAAGITPTTTTASSTPCAASIGASIYTTVSKGC	10626	yes	36.5	NF033629.0	RiPP_CPAC: RiPP peptide	2.3e-05
WP_124155194	Okeania hirsuta	Okeania	1	WP_124155194_2	2	MANINISDLHPTGADLFLDSESYLHDLNEQEMTNTLGGWYVHLIRTTICFGS	1888	yes	16	none	none	none
WP_124155194	Okeania hirsuta	Okeania	1	WP_124155194_1	1	MANIKITELNSELMTEAIANAQARRNNFISELSEEEAAEVLGGIIFRVPFLGITFDF	592	yes	33.45	PF10077.9	Uncharacterized protein conserved in bacteria (DUF2314)	1.9e-05
WP_124271963	Streptomyces sp. ADI96-02	Streptomyces	1	WP_124271963_1	1	MQNVTEKDLFDGYTAYTSAEELGLHDGKEAAPAFSPTIPWAIRATIITARSSQQCAAALGSLAAKTVENKC	3148	yes	58.73	none	none	none
WP_124970176	Aphanothece sacrum FPU1	Aphanothece	1	WP_124970176_9	9	MPNITISDLTPAGSDLFSDSESYLHELKDVEINATRGGITPWLLVVAFTLIAFDAK	99	yes	25.34	none	none	none
WP_124970176	Aphanothece sacrum FPU1	Aphanothece	1	WP_124970176_14	14	MAQIKINDISLAGSDLFSDSESYLTELSHDSELDNTKGGTGVRIYVFTIRVW	1768	no	18.36	none	none	none
WP_124970176	Aphanothece sacrum FPU1	Aphanothece	1	WP_124970176_11	11	MAQIKINDLSLAGSDLFSDSESYLTELSHDSGMLNISGGTGVRIDINISGTSIRIVVQF	1539	no	20.72	none	none	none
WP_124970176	Aphanothece sacrum FPU1	Aphanothece	1	WP_124970176_6	6	MAQIKINDISLAGSDLFSDSESYLTELSHDSEMLNIQGGTSVRLTTSIRTTLFTTYPIPAPTLPIVQAA	2174	no	26.5	none	none	none
WP_125821548	Streptomyces sp. W1SF4	Streptomyces	1	WP_125821548_1	1	MDSMDLIAGYAAYTTPEELAASEATDAPAITTTVTSSEICITITVGWGC	136	yes	36.93	none	none	none
WP_126393842	Streptomyces sp. MK-45	Streptomyces	1	WP_126393842_1	1	MQSTQNEKDLFEGYTAYTSAEELGLYDGKDAAPAFSPTIPWAIRATIITARSSQQCAAAIGSLTAKTIENKC	2920	yes	63.39	PF16934.5	Two-component Enterococcus faecalis cytolysin (EFC)	3.8e-06
WP_127078868	Calothrix desertica PCC 7102	Calothrix	1	WP_127078868_1	1	MATIKISNLRPTGAELFSDSESYMNELGDSELVSVNGGLTSPLCIVTAIRVGYAAARSSQQCAIGIAGAIGGAGRLVERLRKK	1304	yes	27.2	PF10439.9	Bacteriocin class II with double-glycine leader peptide	0.0001
WP_127086205	Calothrix desertica PCC 7102	Calothrix	1	WP_127086205_3	3	MATISISNLRATGADLFADSESYLSELTDAELNETKGGSIIAAAAVYAAVVITTAIAERLSR	1790	yes	27.2	NF000539.0	plantaricin: plantaricin C family lantibiotic	1.9e-06
WP_127086205	Calothrix desertica PCC 7102	Calothrix	1	WP_127086205_1	1	MAKIYISNLSISGAELFADTETYLYELTETEMDMTKGGYFYITAPTVGPTDIMTPIPKYPTTLFQQFQL	669	yes	28.74	none	none	none
WP_127086205	Calothrix desertica PCC 7102	Calothrix	1	WP_127086205_5	5	MANISISNLHATGADLFADSESYLNELTEAELSSTKGGFSPSPITIPIILASPELIKQLKKLL	2097	yes	15.9	none	none	none
WP_127086205	Calothrix desertica PCC 7102	Calothrix	1	WP_127086205_4	4	MATISISNLRNSGAELLMDSESYLNELTETELNITKGGTGNSITITPITITPMTPDLTPRLTKVQ	2479	yes	26.48	NF000539.0	plantaricin: plantaricin C family lantibiotic	1.1e-05
WP_127086205	Calothrix desertica PCC 7102	Calothrix	1	WP_127086205_2	2	MATISISNLSATGADLFADSESYLNELTDSELNETKGGSLFATAVFVIGVAIGYQATKAVTAVAKKLV	1463	yes	28.56	NF000539.0	plantaricin: plantaricin C family lantibiotic	1.4e-05
WP_127086205	Calothrix desertica PCC 7102	Calothrix	1	WP_127086205_6	6	MATISISNLNTSGAELFLDTETYLHELTDSELDMTKGGCICISPIFKPTTILKTTSIVSVLR	374	yes	13.73	none	none	none
WP_127931424	Nonomuraea polychroma	Nonomuraea	1	WP_127931424_2	2	MHDVVRPSKTAAIMELTAGYDAYADASEFSLPAESEAPAATPVTILVLGGFATSYVVSGIARKAWDRTFIFGC	276	yes	25.46	PF05365.12	Ubiquinol-cytochrome C reductase, UQCRX/QCR9 like	1e-05
WP_127931424	Nonomuraea polychroma	Nonomuraea	1	WP_127931424_1	1	MTKSTAIMELVAGYDSYAEPGELQVSAISDAPELWFTIWAVSYGVRVSSAKCAIWASAASGAVSGWILNR	6	yes	50.81	none	none	none
WP_128433866	Streptomyces cyaneus	Streptomyces	1	WP_128433866_2	2	MNTTENLIAGYTAYTSAQEIEATHAEEAPGATPSVLSFIATSGWACGAGIGTSIGVTAAKGC	5960	yes	48.26	none	none	none
WP_129307298	Streptomyces sp. L2	Streptomyces	1	WP_129307298_1	1	MSAQNLMNGFDAYTDAEELAAQPTTVTKEEQSMSLAITLVTISVVHTYDTGC	4832	yes	48.63	none	none	none
WP_129307298	Streptomyces sp. L2	Streptomyces	1	WP_129307298_2	2	MSAQDLMNGFAAYTDVEELAAQATTVTKEEASLSIGLSLSFISGVSVSLTAEHTC	5381	yes	47.78	none	none	none
WP_129307298	Streptomyces sp. L2	Streptomyces	1	WP_129307298_3	3	MTAHDLVEGYRTFADAEELAASPAGEYLPTTTIFTISYPTTATPTISN	5021	yes	31.21	none	none	none
WP_129307298	Streptomyces sp. L2	Streptomyces	1	WP_129307298_4	4	MSEQELIEGYRYFVDVAELAASAERELPTTSIFSYVTTTCTGTVATVSV	5580	yes	28.04	none	none	none
WP_130475988	Amycolatopsis sp. 8-3EHSu	Amycolatopsis	1	WP_130475988_1	1	MNEKDLFAGFDNYTTSAELGLFDDGMDEAGFTPSSAPCVRLTAETIARTIASPC	2794	yes	39.65	none	none	none
WP_130878496	Streptomyces netropsis	Streptomyces	1	WP_130878496_1	1	MDKTDAIMDLVSNYDAYADVAELNVTAAADAPATTPVCAATLASSGWCAAGASAISGATYEAGC	100	yes	52.91	none	none	none
WP_130878496	Streptomyces netropsis	Streptomyces	1	WP_130878496_5	5	MEKSEAIIDLMAGYDAYSSADELNTTAAAEAPASTPACAAATMSWLGSQLTVKTYKDGC	545	yes	31.9	none	none	none
WP_130878496	Streptomyces netropsis	Streptomyces	1	WP_130878496_2	2	MEKSEAIMDLMAGYDAYSTVDELNTTAAADAPATTAPCGAATVSWLASQFTVKTYKDGC	363	yes	44.52	none	none	none
WP_131089594	Arthrobacter sp. S41	Arthrobacter	1	WP_131089594_1	1	MSNTNIVENNSALTDLAQAHTAYAAPSELGADAAAEAPATTPFCAGVLIGATLTVGC	292	yes	28.6	none	none	none
WP_131089594	Arthrobacter sp. S41	Arthrobacter	1	WP_131089594_2	2	MSNTNALTDLAQAHTAYAAPSELGADAAAEAPATSPLCIGIIVGATLGAGC	71	yes	23.44	none	none	none
WP_133616643	Leucobacter luti	Leucobacter	1	WP_133616643_3	3	MSLMTNFTEYTTAQAFATSQMDAAPATTTPVCATITIVALTASMWC	1132	yes	12.94	none	none	none
WP_133890759	Streptomyces sp. BK208	Streptomyces	1	WP_133890759_3	3	MNEKLIAGYAAYTDAAELSAAALGEAPATIEIVTATVASFVASAKTYDISC	3750	yes	40.34	none	none	none
WP_133890759	Streptomyces sp. BK208	Streptomyces	1	WP_133890759_2	2	MNEKLIAGYAAYTDAAELSAAALDEAPATIEIVTATVASFVASAETYDIKC	3493	yes	48.66	none	none	none
WP_133890759	Streptomyces sp. BK208	Streptomyces	1	WP_133890759_4	4	MNEKLIAGYAAYTDADEFGTTALGEALASVESVSWVLSAASAGASVAATFDVGC	2995	yes	36	none	none	none
WP_136238412	Streptomyces sp. Akac8	Streptomyces	1	WP_136238412_3	3	MNTTDALMAGYAAYTSADEIAAGQDGGAPEISPVSLSIAVS	6134	yes	36.27	none	none	none
WP_137451632	Nakamurella flava	Nakamurella	1	WP_137451632_2	2	MQHKTDTILDLVEGYSAYTELSELNVDATSPAPAASTSPVCIATAISSWKCAAGSGAGIATITTGC	153	yes	49.53	PF16934.5	Two-component Enterococcus faecalis cytolysin (EFC)	4.6e-06
WP_137451632	Nakamurella flava	Nakamurella	1	WP_137451632_4	4	MNDTERTGKAGDISDLVAGYRVWSDTAALDLDAGSQAPAATTTFCAFTVSYLASRATVQEGC	613	yes	24.83	none	none	none
WP_137451632	Nakamurella flava	Nakamurella	1	WP_137451632_3	3	MTVSARPEPTPAGDGDKAGQISDLVAGYRVWSDTAALDLDAGSQAPAATTTFCAFTVSYMFSRATVEDGC	365	yes	39.41	none	none	none
WP_137906310	Dolichospermum planctonicum	Dolichospermum	1	WP_137906310_1	1	MASITLSQLNVTGSELFQDSESYLNDLNDASSVAVHGGGSYNSGFGEYGDFGVKYLEYLVDGYAIASIKHIAKSFSHNPSAPSVTAHY	1784	yes	34.17	PF16990.5	Carbohydrate binding module (family 35)	4.9e-06
WP_137906310	Dolichospermum planctonicum	Dolichospermum	1	WP_137906310_5	5	MASIRIYDLHNSQEIKFINDLNNMELLSLFGGEDNDVNQIFYYGVKGLEFMLAVYAIESILFLTNKVRNFL	1248	yes	19.15	none	none	none
WP_138498533	Nostoc sp. PA-18-2419	Nostoc	1	WP_138498533_6	6	MANIAISNLRPAGADLFDGSESFMNDLTDSELDITKGGFTPAFVLGFAAGVAAGVAISYLLK	1622	yes	32.08	none	none	none
WP_138498533	Nostoc sp. PA-18-2419	Nostoc	1	WP_138498533_3	3	MANIAISNLRPAGADLFDGSESFMNDLTDSELDMTKGGLTPAFFAGVAVGIAITYALK	840	yes	35.72	none	none	none
WP_138498533	Nostoc sp. PA-18-2419	Nostoc	1	WP_138498533_4	4	MANIAISNLRPAGADLFDSSESFMNDLTDSELDMTKGGLTPAVFFAGVAAGIAITYLLK	1104	yes	33.86	PF06522.11	NADH-ubiquinone reductase complex 1 MLRQ subunit	2e-05
WP_138498533	Nostoc sp. PA-18-2419	Nostoc	1	WP_138498533_2	2	MANIAISNLRPAGADLFDXSEXFMNDLTDSELDMTKGGLTPAVFFAGVAAGIAITYLLK	1363	yes	36.12	PF06522.11	NADH-ubiquinone reductase complex 1 MLRQ subunit	2e-05
WP_138499068	Nostoc sp. PA-18-2419	Nostoc	1	WP_138499068_4	4	MASIALSQLNTTGSELFQDSESFLNDLNNVDSITIYGGGSDVSSVAEGLDPLLAYGIKGQEFGLLAFGASLTAHIVKSFSDATNYY	3175	yes	40.58	none	none	none
WP_138499068	Nostoc sp. PA-18-2419	Nostoc	1	WP_138499068_6	6	MASIALSQLNTTGSELFQDSESFLNDLNNVDSITIYGGGSDVSSVADGLGPLLAYGIKGQEFGLLAFGASLTAHIVKSFSXSTNYY	2800	yes	38.13	none	none	none
WP_138499068	Nostoc sp. PA-18-2419	Nostoc	1	WP_138499068_5	5	MANIALSQLNTTGSELFQDSESFLNDLNNVDSITIYGGGSDVSNVAEGLDPLLAYGVKGQEFGLLAFGASLTAHIVKSFSDATNYF	3550	yes	38.56	PF11265.8	Mediator complex subunit 25 von Willebrand factor type A	1.2e-05
WP_138499068	Nostoc sp. PA-18-2419	Nostoc	1	WP_138499068_1	1	MASIALSQLNTTGSELFQDSESFLNDLNNVDSITIYGGGSDVSSVAEGLDPLLAYGIKGQEFGLLAFGASLTAHIVKSFSDGTHYF	2424	yes	44	PF11265.8	Mediator complex subunit 25 von Willebrand factor type A	1.3e-05
WP_138499068	Nostoc sp. PA-18-2419	Nostoc	1	WP_138499068_2	2	MASIALSQLNTTGSELFQDSESFLNDLNNVDSITIYGGGSDVSNVAYGLDPLLAYGIKGQEFGLLAFGASLTAHIVKSFSDGTNYY	2049	yes	42.68	none	none	none
WP_138499068	Nostoc sp. PA-18-2419	Nostoc	1	WP_138499068_8	8	MSKIKISDLYIADSESFLIDVSNFDYISIYGSVDDALSQIFNYGEKSLNLALLAFSIYEIAQLAKSFNTQ	1412	yes	16.79	none	none	none
WP_138499827	Nostoc sp. PA-18-2419	Nostoc	1	WP_138499827_4	4	MATIKISDLHPAGSEFFIDSESYLNDLTENEIENLTGAGWYIRFSFNNRGIQVCFSWAWG	2690	yes	19.54	PF18070.1	CRISPR-Cas9 PI domain	2.7e-07
WP_138499827	Nostoc sp. PA-18-2419	Nostoc	1	WP_138499827_1	1	MATIKINNLNVTGYELFNDSESYLNDLTDDEISLTQGGSSLLCYYGIIASMYAARSGIGCVNAANAIVIAGYNYGKNKKWW	4172	yes	32.84	none	none	none
WP_138499827	Nostoc sp. PA-18-2419	Nostoc	1	WP_138499827_2	2	MATIKIFDLHPAGSELFLDSESYLNDLTDDELNSTQGGLSPLTISSWWCAGAIAYSVTYAWGRWGPK	3540	yes	29.54	none	none	none
WP_138499827	Nostoc sp. PA-18-2419	Nostoc	1	WP_138499827_3	3	MATIKISDLHPAGSELFVDSESYLNNLTDEELNRTQGGSSFGCIWISVQVSIVTYKAYQGYQAGRRAR	3259	yes	22.94	none	none	none
WP_138499827	Nostoc sp. PA-18-2419	Nostoc	1	WP_138499827_5	5	MATIKINNLNASGSDLFNDSESFLNELTEDELNVTKGGSTPFCITIVVSVVVYGKYRGWW	2991	yes	16.17	NF000539.0	plantaricin: plantaricin C family lantibiotic	1.1e-05
WP_138666048	Nonomuraea turkmeniaca	Nonomuraea	1	WP_138666048_2	2	MHDVVRPSKTAAIMELTAGYDAYADASEFSLPAESEAPAATPVTILVLGGFATSYVVSGIARKAWDRTFIFGC	265	yes	35.67	PF05365.12	Ubiquinol-cytochrome C reductase, UQCRX/QCR9 like	1e-05
WP_138666048	Nonomuraea turkmeniaca	Nonomuraea	1	WP_138666048_1	1	MTKSTAIMELVAGYDTYAQPGELQVSAISDAPELWFTIWAISYGVRVSSAKCAIWASAASGAVSGWILNR	6	yes	48.71	none	none	none
WP_138689268	Nonomuraea zeae	Nonomuraea	1	WP_138689268_3	3	MHDVVRPSKSSAIMELTAGYDAYADASEFSLSAESEAPAATPLTILVLGGFATSYVVSGIARKAWDRTFIFGC	266	yes	34.65	none	none	none
WP_138689268	Nonomuraea zeae	Nonomuraea	1	WP_138689268_2	2	MTKSTAIMELVAGYDSYAQPSELQVSAISDAPELWFTIWAISYGVRVSSGRCAIWASAASGAVSGWILGR	6	yes	39.18	none	none	none
WP_139627778	Nonomuraea sp. WYY166	Nonomuraea	1	WP_139627778_2	2	MTTTDQLMAGYATYATPQEVGAAAAGEAPEISPISVAVLSFIGQSSYACGAGISMAVSFTIGKGC	6337	yes	39.43	none	none	none
WP_139979956	Nocardioides litoris	Nocardioides	1	WP_139979956_2	2	MSKDELVGGFKEYSDAEEINNQVEEGDETPATTVPCSAIGSAILTNNFNC	29	yes	49.57	none	none	none
WP_141310912	Streptomyces spinoverrucosus	Streptomyces	1	WP_141310912_1	1	MQSTQNEKDLFEGYTAYTSAEELGLYDGKDAAPAFSPTIPWAIRATIITARSSQQCAAALGSLTAKTIEKKC	3059	yes	65.59	none	none	none
WP_141720451	Streptomyces sp. SID4946	Streptomyces	1	WP_141720451_1	1	MNTADQLIAGYTAYTSSEEFGVTAEGDAPATTPSILASIDTSSAACGATIGYSISQTIHGGC	525	yes	33.49	none	none	none
WP_141720451	Streptomyces sp. SID4946	Streptomyces	1	WP_141720451_2	2	MNTADQLIAGYIAYTSAEEFGVTAEGDAPATTPVTVTTVSSTECVSLTASVVGTTLSGHC	282	yes	33.06	none	none	none
WP_141936425	Microbacterium sp. SLBN-154	Microbacterium	1	WP_141936425_2	2	MDAATQSLIAGYRSYAGAADLVEMTEAAPAATPGILSFIAASSAACGTATSIVSVGGTSFTVTYGC	1	yes	47.64	none	none	none
WP_141936425	Microbacterium sp. SLBN-154	Microbacterium	1	WP_141936425_3	3	MSHTQSLVAGFSAYAQASELSALTGEAAPAATPSTVSVFLTASSPECVAFSIGASAGAVTSTGVTITAGC	225	yes	46.79	none	none	none
WP_142936832	Arthrobacter sp. TS-15	Arthrobacter	1	WP_142936832_1	1	MTHAITNIPQADLTDLARAHSTFTAADELGGDAATDAPATTPFCAGVIIGATLTMGC	378	yes	31.36	none	none	none
WP_142936832	Arthrobacter sp. TS-15	Arthrobacter	1	WP_142936832_2	2	MSNAVVNFHQANLTDLARAHSTFAAADELGGDAATEAPATSPLCIGIIVGATLGAGC	112	yes	28.74	none	none	none
WP_143043955	Nonomuraea jiangxiensis	Nonomuraea	1	WP_143043955_3	3	MAEKDLVDGYEAYTDAEELAFDEAGDEESPSTPWCIASIVITASAGC	210	no	33.24	none	none	none
WP_143043955	Nonomuraea jiangxiensis	Nonomuraea	1	WP_143043955_1	1	MAEKDLVDGYEAYTDAEELAFDEAGDEESPSTPWCIASIVITASAGC	678	yes	38.24	none	none	none
WP_144873874	Hyella patelloides LEGE 07179	Hyella	1	WP_144873874_1	1	MADIKISDINFDGNDLFTDSENFMNDLSNDDMGLIQGGDWSTFSGACRFVDADEWSTVSDYCRTVAAIDPGFKKLSS	1358	yes	28.82	none	none	none
WP_145487439	Streptomyces collinus	Streptomyces	1	WP_145487439_1	1	MEKTTAIMELMAGYEAYSDARELNVAAAAEAPATTPACLASATASFVASQFSAKTIAGGC	417	yes	43.39	none	none	none
WP_145487439	Streptomyces collinus	Streptomyces	1	WP_145487439_2	2	MDKSMAIMELVSNYDAYADVDELNISAAADAPATTPVCAVSVASSSWCAASASAASGATYELTC	152	yes	30.88	none	none	none
WP_148763415	Dolichospermum sp. UHCC 0315A	Dolichospermum	1	WP_148763415_5	5	MANIRISNLENTDEKKFIINLSNLDAVSVFGGEYNNASQILNYGVKALEFVLVIYAIDAISLLTKTFRK	1275	yes	27.78	none	none	none
WP_148763415	Dolichospermum sp. UHCC 0315A	Dolichospermum	1	WP_148763415_2	2	MATITLSQLNTTGSELFADSESYLNELNDAASVSINGGGGDFSGFSAYGDFGVKYLEFLVDGYAIASIKHIAKSFSNDSHYGH	1640	yes	39.39	PF07715.15	TonB-dependent Receptor Plug Domain	4.5e-06
WP_149853923	Goodfellowiella sp. AN110305	Goodfellowiella	1	WP_149853923_1	1	MSVMLQDRTADLVAGYENYTTAQELTLAVAEGYEDLVAKSTPITITITTTTLIFSCQHD	44	yes	28.66	none	none	none
WP_151696789	Microcystis aeruginosa NIES-4325	Microcystis	1	WP_151696789_3	3	MQKIRIDNLECPAGYDLFLDSESFLDEVHESEYQRINGGVSPTLASSAWCFAGGVAVGAAISGAIAWGVKKILE	619	yes	24.86	PF10439.9	Bacteriocin class II with double-glycine leader peptide	5.3e-08
WP_151696789	Microcystis aeruginosa NIES-4325	Microcystis	1	WP_151696789_1	1	MANITISELRPAGADLLFDSESFLDYLNDDELCSVSGGATTPTTPTIVATTFACGVVVGIVAVGAIAWTLSK	388	yes	27.49	PF15096.6	G6B family	4.3e-06
WP_152591271	Nostoc sphaeroides CCNUC1	Nostoc	1	WP_152591271_1	1	MASIRISELRPAGSELFQDSESFLTDLGAQEMGITGGASVVGGISVTVTQTVTQTATQTQTQTATQTFTQTVSLNVP	1659	yes	33.44	none	none	none
WP_153461219	Streptomyces kaniharaensis	Streptomyces	1	WP_153461219_2	2	MNTTDQLIAGYTAYTDAQEVGASASAEAPATTPTIVTASSPECGAFTVSVVSGAVGATANWGC	3398	no	44.27	none	none	none
WP_153461219	Streptomyces kaniharaensis	Streptomyces	1	WP_153461219_3	3	MNTTDQLIAGYTAYTDAQEVGASASAEAPATTPTIVTASSPECGAFTVSVVSGAVGATANWGC	3692	no	44.19	none	none	none
WP_153461219	Streptomyces kaniharaensis	Streptomyces	1	WP_153461219_4	4	MNNADQLIAGYTAYTDAEEVGAGATAEAPATTPALSVIAVSTAACGAAVGSAIGGSIAGTVNWGC	3986	no	42.28	none	none	none
WP_155349848	Acrocarpospora pleiomorpha	Acrocarpospora	1	WP_155349848_3	3	MSTELLIEGADAYTSLAEVAVGAGVESPEATPALIISFSIGVSVTATAAMGC	213	yes	16.34	none	none	none
WP_155349848	Acrocarpospora pleiomorpha	Acrocarpospora	1	WP_155349848_1	1	MSVEHLMEGADAYTSLAEVATANEIESPEATPLTTVTTISFISFTVVLGC	414	yes	34.37	none	none	none
WP_155349848	Acrocarpospora pleiomorpha	Acrocarpospora	1	WP_155349848_2	2	MPTELLIGGADVYTSFAEIAAAHTDSAAAVPATISITWSICTLTIEGGC	44	yes	31.82	none	none	none
WP_155358788	Acrocarpospora macrocephala	Acrocarpospora	1	WP_155358788_1	1	MSAEHLMEGADAYTSLAEVATANEIESPEATPLTTVTTISFISFTVVLGC	440	yes	39.28	none	none	none
WP_155358788	Acrocarpospora macrocephala	Acrocarpospora	1	WP_155358788_2	2	MSVELLMKGADNYTSLAEVAAAAEMESPEATPALVISFSIGVSVTATAAMGC	239	yes	27.61	none	none	none
WP_155358788	Acrocarpospora macrocephala	Acrocarpospora	1	WP_155358788_3	3	MPTDLLIEGADAYTSLAEIAAAHADSVAAVPTPISITWSICTLTIEGGC	44	yes	27.1	PF08196.11	UL2 protein	2e-05
WP_155746097	Scytonema sp. UIC 10036	Scytonema	1	WP_155746097_1	1	MASIEISNLHPVGSNLFNDSESYLNELSDREMLGLEGGILGALGGTLAGLIPAEGLLGYGSLNVTGPDSVQNVTGLDFLAGLLGGGSKGT	1398	yes	41.14	none	none	none
WP_155746097	Scytonema sp. UIC 10036	Scytonema	1	WP_155746097_2	2	MSNIKIENIQPAGSQLFQDPESFLNEMSDREMWSVQGGLTLDTLVITFPATISDPLSSATAGTLSEVSSGVTSGTVGGLSLTGAV	1961	yes	28.31	PF10439.9	Bacteriocin class II with double-glycine leader peptide	7.2e-07
WP_155862233	Corynebacterium durum F0235	Corynebacterium	1	WP_155862233_4	4	MSTTSNDQRSRDLVSGYDIYTSKDELFTMSVEDAPAATPVLSFIGYSSYACGGGISFIATAGATTIAKGC	2390	yes	21.3	none	none	none
WP_157846946	Streptomyces achromogenes subsp. achromogenes	Streptomyces	1	WP_157846946_1	1	MEKVDSIMELLSGYETYSTVEEINLSAASDAPATTLVCAATAGASWLTGQAVSKTYDEGC	324	yes	50.72	PF06097.11	Bacterial protein of unknown function (DUF945)	1.4e-06
WP_157846946	Streptomyces achromogenes subsp. achromogenes	Streptomyces	1	WP_157846946_2	2	MNNTDSIMELVAGYETYMDASELDVNAVTDAPATTWYCVSAGVSFVTAATYEATC	66	yes	50.54	none	none	none
WP_157857956	Streptomyces durhamensis	Streptomyces	1	WP_157857956_1	1	MQSTQTEKDLFEGYTAYTSAEELGLYDGKDAAPAFSPTIPWAIRATIITARSSQQCAAALGSLTAKTIEKKC	3319	yes	58.88	none	none	none
WP_158686821	Streptomyces sp. CNT372	Streptomyces	1	WP_158686821_1	1	MQKNDTVDIMELVGGFEAYAEAAELNFEASADAPAITPTLTTIAYTKVSVASVSASIKVGC	6659	yes	37.7	none	none	none
WP_159425899	Streptomyces noursei ATCC 11455	Streptomyces	1	WP_159425899_2	2	MKTQDLIAGYAAYVDVAELNVSAASEAPATSPVCFAAATSSAACLAATSSGWCVAGAGAGVGGGIAQSVKHGC	105	yes	20.22	PF09237.11	GAGA factor	2.8e-06
WP_159425899	Streptomyces noursei ATCC 11455	Streptomyces	1	WP_159425899_3	3	MELDEMISGYDTYVDVAELDVSAQSEAPATSPTCFIASVGLSYQITKDL	342	yes	14.09	PF09237.11	GAGA factor	7.5e-07
WP_159688203	Streptomyces sp. Tu 2975	Streptomyces	1	WP_159688203_1	1	MQKNDTVDIMELVGGFEAYAEAAELNFEASADAPAITPTLTTIAYTKVSVASVSASVKWGC	6725	yes	42.98	none	none	none
WP_159770677	Streptomyces sp. HM190	Streptomyces	1	WP_159770677_1	1	MQSTQNEKDLFEGYTAYTSAEELGLYDGKDAAPAFSPTIPWAIRATIITARSSQQCAAALGSLTARTIEKKC	3317	yes	65.39	none	none	none
WP_161481447	Herbidospora sp. NEAU-GS84	Herbidospora	1	WP_161481447_1	1	MNDLIAGYANYASTEAILQERQLAAREPETGLFTLTITISLTITVTISL	1789	no	38.11	none	none	none
WP_161481447	Herbidospora sp. NEAU-GS84	Herbidospora	1	WP_161481447_6	6	MNDLIAGYANYASTEAILHERQIASRDAESISATVTVTWTLTVSWSYSWSY	2123	no	30.18	none	none	none
WP_161481447	Herbidospora sp. NEAU-GS84	Herbidospora	1	WP_161481447_4	4	MHELVAGYANYASTEALLREQLSGLEAGYYPTIFSVTAPNSVTLSWTSTL	1952	no	31.28	none	none	none
WP_161481447	Herbidospora sp. NEAU-GS84	Herbidospora	1	WP_161481447_5	5	MSELIAGYANYASTESLLQEHSEAGHWTEWTLWFTVTMSVTPTTSY	1460	no	30.64	none	none	none
WP_161481447	Herbidospora sp. NEAU-GS84	Herbidospora	1	WP_161481447_3	3	MSELIAGYANYASTEAILQEQAAGRVLEAGLFFSVTFSFTHSNSISFSI	1623	no	31.78	none	none	none
WP_161481447	Herbidospora sp. NEAU-GS84	Herbidospora	1	WP_161481447_7	7	MPGELIAGYANYASTESVLSENTTAEWWPITSYTVTLSTTTTSIWI	1309	no	26.51	none	none	none
WP_162398402	Nostoc sp. B(2019)	Nostoc	1	WP_162398402_1	1	MATIKIDNLSISGTELFSDSESYFDQLSELSESDALGIKGGTWTITITTVLLLRGDTRQE	1587	yes	28.85	NF000539.0	plantaricin: plantaricin C family lantibiotic	4.3e-06
WP_162399505	Nostoc sp. B(2019)	Nostoc	1	WP_162399505_5	5	MATIEISDLHTADSETFLTNLNDVDSIYGGEEYAFAQTLNFGMKILEAAIAIFAISSITWIAKSFNAEKFML	1472	yes	19.08	PF01411.19	tRNA synthetases class II (A)	4e-06
WP_162399505	Nostoc sp. B(2019)	Nostoc	1	WP_162399505_1	1	MATITLSELRNAGSQLFQDSESFLNDLNDVDVISGGYDNFSKFYGFEKVIEGYVNVYAIGHVTYLAKSFSSNDYSAH	2302	yes	32.65	none	none	none
WP_162399505	Nostoc sp. B(2019)	Nostoc	1	WP_162399505_4	4	MATITLSELRNAGSQLFQDSESFLNDLSDVDAISGGYDNFSDFHGFDKIXXXXXXXXXXXXXXXXXXXXXXXXXXXXXXXXXXTL	2545	yes	27.59	none	none	none
WP_162399505	Nostoc sp. B(2019)	Nostoc	1	WP_162399505_2	2	MTTIILSELRHAGSQLFQDSESFLNEMSDLDSISGGYDSGFSNYSGYTKLIEGYVITYAIDQIVYLAKSFSSHDSNY	1934	yes	31.76	PF12746.7	GNAT acetyltransferase	3.6e-06
WP_162944541	Flavisolibacter sp. X7X	Flavisolibacter	1	WP_162944541_1	1	MILTAAFIEGVALFAVIAGILAMFV	3003	yes	7.91	none	none	none
WP_163670238	Leptolyngbyaceae cyanobacterium CCMR0082	Leptolyngbyaceae	1	WP_163670238_2	2	MSSIKIVSLSPAGLEMMQSPESFLTELGDAEDAIYGGKVYSDSRVVALSVFTTPACIASVIASNIVTNTD	1065	yes	18.96	none	none	none
WP_163699711	Leptolyngbyaceae cyanobacterium CCMR0081	Leptolyngbyaceae	1	WP_163699711_2	2	MSTITIKKLNPAGTTFFSETESFLGDLNEATLSNINGGGTLNTGSMYCTTRHCGEDFSIFAPVVVVILTPSDSPIPY	1714	yes	19.97	none	none	none
WP_163699711	Leptolyngbyaceae cyanobacterium CCMR0081	Leptolyngbyaceae	1	WP_163699711_3	3	MSSIKVDSLSPAGLEMMQSSESFLTELGDADDKIYGGKIYSDSRTTISVISTPPCIAGFIASNIVTNL	3884	yes	19.03	none	none	none
WP_163927072	Nostoc sp. UIC 10630	Nostoc	1	WP_163927072_2	2	MATINISDLHPTGSDLFSDSESYINELGDGELDATYGGSTPIIWSVRASVVLTIAAVTLFTNQGEAN	1926	yes	23.8	none	none	none
WP_163927072	Nostoc sp. UIC 10630	Nostoc	1	WP_163927072_1	1	MATINISDLHPAGSDLFSDSEGYMNDLGDNEFDSIYGGLLPALLFSVGKLVAQRSSAVCAKKAAQGIAVVSGAVSSWIASPDF	1610	yes	45.4	none	none	none
WP_163927072	Nostoc sp. UIC 10630	Nostoc	1	WP_163927072_3	3	MSNITINDLNLPGFYLLSGEESYLNEINDNELDLTRGGFLFTLITLFGGGGTASVIARKIHDYNRGPIAHL	1338	yes	22.73	none	none	none
WP_164312175	Streptomyces sp. SID12501	Streptomyces	1	WP_164312175_2	2	MNEKLIAGYAAYTTADEYGTAATGEAPASVETVGISIASVALSIMSVVDKC	1527	yes	43.07	none	none	none
WP_164312175	Streptomyces sp. SID12501	Streptomyces	1	WP_164312175_3	3	MNEKLIAGYAAYTTADEYGTAATGEAPASIESISWAVSGAAVGASISLTVQNGC	1737	yes	38.68	PF04829.13	Pre-toxin domain with VENN motif	0.0014
WP_164390060	Streptomyces sp. PRKS01-65	Streptomyces	1	WP_164390060_1	1	MNDIELAAGFDAYADVNEMADEVTPDEAPSPQTIISVIVTASFDC	156	yes	34.39	none	none	none
WP_164394909	Streptomyces sp. PRKS01-65	Streptomyces	1	WP_164394909_1	1	MDTHELIEGFDAYVEAEELNEDAMVDAPATTLPCTVASFATGYFSC	30	yes	43.68	none	none	none
WP_164496180	Streptomyces sp. ADI95-16	Streptomyces	1	WP_164496180_1	1	MNEIDLAAGFDTYADVNEMATEVTPDEAPSPQTIVSLSVVASIKWGC	155	yes	39.16	none	none	none
WP_166282462	Aphanocapsa montana BDHKU210001	Aphanocapsa	1	WP_166282462_2	2	MPNIQLNDLSSNGSELFSDSETYLNDLTQEELSTQGGAFSTPICAVIVLSAYSVSIIASAAKSNPKSPHRP	1510	yes	28.02	none	none	none
WP_166282462	Aphanocapsa montana BDHKU210001	Aphanocapsa	1	WP_166282462_1	1	MSKIQVNDLNNSGADLFEDSESYMNDLERDSLGAVGAGLMLSPAPSLGPSIIVITRTSIPTLTNPTLTNSTVITKTSISPVTL	4531	yes	33.18	none	none	none
WP_166841243	Paenarthrobacter sp. MSM-2-10-13	Paenarthrobacter	1	WP_166841243_2	2	MSNAVVNFHQANLTDLARAHSTFAAADELGGDAATEAPATSPLCIGIIVGATLGAGC	113	yes	28.74	none	none	none
WP_166841243	Paenarthrobacter sp. MSM-2-10-13	Paenarthrobacter	1	WP_166841243_1	1	MTHAITNIPQADLTDLARAHSTFTAADELGGDAATDAPATTPFCAGVIIGATLTMGC	379	yes	31.36	none	none	none
WP_167407701	Nostoc flagelliforme CCNUN1	Nostoc	1	WP_167407701_3	3	MASIKMSNLYPVGSELFKDSDSFMTELIDNELGSIKGSYDSCWCKPGIYSPLCKPSLPHYITTTLPPVI	1130	yes	17.14	none	none	none
WP_167717694	Tolypothrix sp. PCC 7910	Tolypothrix	1	WP_167717694_3	3	MANIKVNDLLNLNLAGTELFNDLESFLKEFSEDDNQIFGGGINLTFPTPSCNCANTSVWCKGESMIMA	4343	yes	23.15	PF01462.18	Leucine rich repeat N-terminal domain	1e-06
WP_167717694	Tolypothrix sp. PCC 7910	Tolypothrix	1	WP_167717694_2	2	MNNIKVNDLLYLNMNGADLFNDSESFLTELSDESEQINRIYGGYCVPTSCQEVTNVCMTMTIYFTQMAVGMQA	4002	yes	23.52	none	none	none
WP_167717694	Tolypothrix sp. PCC 7910	Tolypothrix	1	WP_167717694_4	4	MANIKVHDLLNLNLTGAELFNDSESFLKELSEDENQIFGGTACVPGTCQEVTPLCLRTTQIIVHALV	3682	yes	22.9	none	none	none
WP_167721203	Tolypothrix sp. PCC 7910	Tolypothrix	1	WP_167721203_6	6	MATIRIEQLSAGFELIADEETFLDELSDSDLDLNKGGITPVITSLIVFSAGYGVGRAISEIFK	2429	yes	36.61	none	none	none
WP_167721203	Tolypothrix sp. PCC 7910	Tolypothrix	1	WP_167721203_2	2	MAAIAISDIRPAGADLFAGSENFMSDLADSELNSINGGLTPVVIWGVAITSEYVIGAFAVGVGAGIYTAVKK	3085	yes	50.84	PF04369.13	Lactococcin-like family	1.3e-05
WP_167721203	Tolypothrix sp. PCC 7910	Tolypothrix	1	WP_167721203_3	3	MAVIAISNLRPAGADLFAGSENFMSDLVDSELNAVNGGISPLVIWGVAITSEYVISAFSVGVGAGIYTALK	2187	yes	46.54	none	none	none
WP_167721203	Tolypothrix sp. PCC 7910	Tolypothrix	1	WP_167721203_10	10	MSRLRIGDLNSAGSELFQDSETFLLDLKDDEILMHHGGIFITTNISVINVPISEDIFAPSISFIR	1664	yes	19.71	none	none	none
WP_167721203	Tolypothrix sp. PCC 7910	Tolypothrix	1	WP_167721203_8	8	MATIRIEQLSAGFELIADEETFLDELSNSDLDLNKGGITPVITSLIVFSAGYGVGRAITAIFK	3330	yes	26.33	none	none	none
WP_167725682	Tolypothrix sp. PCC 7910	Tolypothrix	1	WP_167725682_1	1	MANIKVSELSPAGSELFQDSESFLNDLNDMDTTSVHGGEGANYIPYLQFGSKLLEYSVVGLGITTIASLVGTFSSTGTGVGGGGTGGGVGGGTGGSTGGSTGGTITF	2328	yes	48.51	none	none	none
WP_167725682	Tolypothrix sp. PCC 7910	Tolypothrix	1	WP_167725682_2	2	MANIKVSELSPAGSELFQDSESFLNDLNDMDTTSVHGGEGANYVPYLQFGSKLLEYSVVGLGITTIASLVGTFSSTGTGVGGGTGGGTSGGNTI	1885	yes	46.98	none	none	none
WP_167725682	Tolypothrix sp. PCC 7910	Tolypothrix	1	WP_167725682_4	4	MNRIVIFDLHQSGSNEIGNSESFIEDVTEIDSMCIHGGEGYAFSEFLNFGVKVLEYALIGFAISSIVSLVQMFLSPRQNQNNSLPTIYPPIS	1476	yes	17.81	none	none	none
WP_167725682	Tolypothrix sp. PCC 7910	Tolypothrix	1	WP_167725682_3	3	MANINIANLHQRDNLDYIDELHNSEINHIIGGAVTITVPVTESNQQFLELFNTLNDPNRGPITINFGNSASVSNPVISNPFDKGINPF	3311	yes	24.22	PF04604.13	Type-A lantibiotic	3.1e-06
WP_168357543	Dolichospermum planctonicum UHCC 0167	Dolichospermum	1	WP_168357543_1	1	MASITLSQLNVTGSELFQDSESYLNDLNDASSVAVHGGYYGGGFGEYGDFGVKYLEYLVNGYAITSIKQIAKSFSHNPSASASTGPW	1802	yes	35.2	none	none	none
WP_168357543	Dolichospermum planctonicum UHCC 0167	Dolichospermum	1	WP_168357543_5	5	MASIRIYDLHNSEEIKFINDLNNMELISLFGGENNDVNKILYYGVKGLEFMLAIYAIDSILFLTNKARNLS	1263	yes	19	none	none	none
WP_168465654	Aphanizomenon sp. UHCC 0183	Aphanizomenon	1	WP_168465654_4	4	MANIRISNLENTDEKKFIINLSNLDAVSVFGGEYNNANQILNYGIKALEFVLVIYAIDAISLLTKTFRK	1274	yes	27.78	none	none	none
WP_168465654	Aphanizomenon sp. UHCC 0183	Aphanizomenon	1	WP_168465654_1	1	MATITLSQLNTTGSELFADSESYLNELNDAASVSINGGGSDFSGFSAYGDFGVKYLEFLVDGYAIASIKHIAKSFSNDSHSGGYGH	1640	yes	40.64	none	none	none
WP_168496018	Anabaena sp. UHCC 0204	Anabaena	1	WP_168496018_1	1	MASIKLSQLHANGSELFQDSESFLNEMNDVDTISVQGGSGSGIYDLVQYSIKGKEFVLLGFAIDNVVSLAKSFSYDSHGAGYGYY	1663	yes	42.46	none	none	none
WP_168496018	Anabaena sp. UHCC 0204	Anabaena	1	WP_168496018_3	3	MARITISDLHITQEKLLINEISNLESVSIFGGDSNNFQELVRFGIKSMEFILLAYAIDSISYLGSSFNNKD	1243	yes	18.6	none	none	none
WP_168501874	Anabaena sp. UHCC 0187	Anabaena	1	WP_168501874_4	4	MARIIISDLTISEKLLIHEISNMESVSIFGGNSSNFNELVKFGIKSMEFILLAYAIDSISYLATSFNKHN	1254	yes	13.98	PF11929.8	Domain of unknown function (DUF3447)	1.6e-06
WP_168643398	Dolichospermum sp. UHCC 0259	Dolichospermum	1	WP_168643398_6	6	MASIRINDIQAQDSFLNELSDEQLELTRGGVLFFAILALGVSSAALGYVMGRNDRQ	2813	yes	24.95	none	none	none
WP_168643398	Dolichospermum sp. UHCC 0259	Dolichospermum	1	WP_168643398_9	9	MAVIKVENLSVVGSELFSDYENYLDELLETESINIKGGWTSVLVISTWALR	3245	yes	15.78	none	none	none
WP_168643398	Dolichospermum sp. UHCC 0259	Dolichospermum	1	WP_168643398_4	4	MATIKISDLRPVGYDLFSDQESYLTSLTEDELGAQGSAGYTILTTSSGVCVSVGLTVVAVTFAASYIKGRYF	2395	yes	35.14	none	none	none
WP_168643398	Dolichospermum sp. UHCC 0259	Dolichospermum	1	WP_168643398_7	7	MSKLKVYDLNSAGFQFFQDTETFLMDLKEDDLSITRGGIIIFPNISVIQVPVSEDLYQPSISIIR	1380	yes	21.15	none	none	none
WP_168645325	Dolichospermum sp. UHCC 0259	Dolichospermum	1	WP_168645325_1	1	MASITLSQLNVTGSELFQDSESYLNDLNDAASVSINGGGSGFSDFGVYGDFGVKYLEFLVDGYAIASIKHIAKSFSGDSYRGY	1675	yes	39.86	none	none	none
WP_168645325	Dolichospermum sp. UHCC 0259	Dolichospermum	1	WP_168645325_4	4	MANVTISDLHNAHEKKFIINLDDMDSISIFGGEYNDVHQILNYGVKALEFVVAIYAIDTISLLTRAFKK	1273	yes	31.22	none	none	none
WP_168688294	Leifsonia sp. PS1209	Leifsonia	1	WP_168688294_2	2	MHTTTAVHADLTDLAAAHNAFATAGELGADAATDAPATTPFCVGIIIGATLTAGC	83	yes	15.41	none	none	none
WP_169219633	Brasilonema sp. UFV-L1	Brasilonema	1	WP_169219633_3	3	MAIIKIDELRPTGAELFQDSESFLNELSDSEMSIFGGKDKDSDPTVLSIDTYSISIYSESVITNYYDVDIKIKVKNK	3184	yes	32.05	none	none	none
WP_169219633	Brasilonema sp. UFV-L1	Brasilonema	1	WP_169219633_2	2	MSSIKISQLRRPVGSELFEDTESFLHELTSEEIREIKGGLIVSVVSESMSIYTQSQIVIPVNDRAIFAEDISLDNKTAALLLEQNIKFI	1478	yes	37.78	none	none	none
WP_169219633	Brasilonema sp. UFV-L1	Brasilonema	1	WP_169219633_1	1	MAIIKISELRPAGSELFQDSESYLNELNEQEVSMAIGGEGGSDVTSSVISINSQTVSLQTQSVITQVKTDVTKNVTW	2103	yes	38.69	NF000539.0	plantaricin: plantaricin C family lantibiotic	4.1e-06
WP_169242999	Chroococcidiopsis sp. PCC 6712	Chroococcidiopsis	1	WP_169242999_3	3	MKDNLINNIAPAGADLFSGFGSFLNDLSEHDEAVIAGGGSNSRSRSGRRRRPRRRPRRRVVRKRGSRT	384	yes	32.58	PF07420.11	Protein of unknown function (DUF1509)	0.00011
WP_169264744	Brasilonema sennae CENA114	Brasilonema	1	WP_169264744_1	1	MVEILCRKDLIIVIKNTLKNIQIMKNTDKNITNNIKNDVPVAGTDFFADSEDFLNELTDSELVQVRGGNSGLSVVTCDRNGTNGQSGLSLVLCD	1583	yes	17.08	PF08965.10	Domain of unknown function (DUF1870)	2.7e-05
WP_169264746	Brasilonema sennae CENA114	Brasilonema	1	WP_169264746_1	1	MVEILCRKDLIIVIKNTLKNIQIMKNTDKNITNNIKNDVPVAGTDFFADSEDFLNELTDSELVQVRGGNSGLSVVTCDRNGTNGQSGLSLVLCD	15	yes	17.08	PF08965.10	Domain of unknown function (DUF1870)	2.7e-05
WP_170198719	Thermopolyspora flexuosa	Thermopolyspora	1	WP_170198719_1	1	MKGTPMMELVAGYDAYATAAELNIEASVDAPATSPVCAVSAASSKWCVSALIGASAGATYKVGC	139	yes	52.67	none	none	none
WP_170198719	Thermopolyspora flexuosa	Thermopolyspora	1	WP_170198719_2	2	MQAMLTEELVTGYRSYAEAADLNVGAAADVPASSPFCGFVASFMFSYVTTNGPGRNKAVV	405	yes	48.96	none	none	none
WP_171977306	Brasilonema sennae CENA114	Brasilonema	1	WP_171977306_1	1	MASINISDIRPAGSELFVDSESFMNDLADQELSATKGGLSPIVIWGVAIASEYVIGAMVSGAAVGAYSALKKK	2006	yes	38.99	PF10439.9	Bacteriocin class II with double-glycine leader peptide	2.5e-07
WP_171977306	Brasilonema sennae CENA114	Brasilonema	1	WP_171977306_3	3	MATICIRDLAGFDLMSDEESYLNEFTEEDFPAIKGGITPFITTVVAFSASAGASYAISRLFK	1734	yes	15.62	none	none	none
BAZ15600	Calothrix sp. NIES-4071	Calothrix	2	BAZ15600_2	2	MNFATVTTFTYGILSIVGGIIGYKQAGSKISLISGAISGILLILAGILQLQGQSYAFVLAGVITLILVIFFAFRLQKTRKFMPAGLMTVLGVITLIVIASQFF	1849	yes	23.3	PF03203.14	MerC mercury resistance protein	0.00096
BAZ29305	Cylindrospermum sp. NIES-4074	Cylindrospermum	2	BAZ29305_1	1	MNLGIVATLGYGVLAIVGGIIGYIQAGSKVSLLSGSISGLLLIFAAYLTLQGQTWALILAALVTGVLVVVFSFRLAKTRKFMPAGLMIILGTLALVVMVNQILTATRV	2219	yes	40.66	PF13273.6	Protein of unknown function (DUF4064)	0.0015
BAZ41701	Calothrix sp. NIES-4101	Calothrix	2	BAZ41701_1	1	MFSIVATFAYGILAMIGGIIGYVQSQSKISLISGTISGSLLVIAGFLQVQGLEFAFVFASVITAVLVVIFAIRLKKTRKLMPAGLMTGLGMVTLVLILSRLLVR	2436	yes	36.8	PF13273.6	Protein of unknown function (DUF4064)	0.013
BAZ80283	Sphaerospermopsis kisseleviana NIES-73	Sphaerospermopsis	2	BAZ80283_1	1	MNLGIVAAFGYGILALLGGIIGYIQAKSKVSLISGIISGLFIIFAAYCQLQGQSWGLSVAAFVIGVLVFFFSIRLAKTRKFMPGGLMIIFGIVTLVVILNQI	1845	yes	37.11	PF13567.6	Domain of unknown function (DUF4131)	0.0023
RCJ31639	Nostoc minutum NIES-26	Nostoc	2	RCJ31639_2	2	MNLSIIAVFSYGILAIVGGIIGYIQANSQVSLLSGSISGLLLIFAAYFQLQGQGWALILAAFITAVLVVVFAFRLAKTRKFMPAGLMTILGMLALTVMVNQLVTGK	2528	yes	37.3	PF13273.6	Protein of unknown function (DUF4064)	0.00072
RCJ34841	Nostoc punctiforme NIES-2108	Nostoc	2	RCJ34841_1	1	MNLGIVAAFAYGILAIVGGVIGYIQATSKVSLLSGSISGLLLILAAYFQLQGQTWGSILAVLVTAVLVVVFAFRLAKTRKFMPAGLMTILGMLALAVMVNQMVALR	2213	yes	42.36	PF13273.6	Protein of unknown function (DUF4064)	0.017
TAE58797	Nostocales cyanobacterium	Nostocales	2	TAE58797_1	1	MNLGIFAAFGYGILVLIGGIIGYIQVKSQVSLISGIISGLLIIIAAYCQLQGITWGLALAGVVTGFIVTFFAIRLAKTRKFMPAGLMVIFGVLALVIILNQIVSSQ	1753	yes	42.13	PF03647.13	Transmembrane proteins 14C	3.4e-24
TVP62142	Nodularia sp. (in: Bacteria)	Nodularia	2	TVP62142_1	1	MNSSIIAALTYGILAMIGGIIGYIKANSQVSLFSGIISGLLLILAAYFQIQGQAWALILAVLVTGTLVIFFALRLAKTRKFMPAGLMVILGVLALTLMVHQLAIAR	1997	yes	48.38	PF13273.6	Protein of unknown function (DUF4064)	0.00055
TWH40986	Calothrix desertica PCC 7102	Calothrix	2	TWH40986_1	1	MNLATIITFTYGILSIVGGIIGYKQAGSKISLISGAISGLLLIIAGIIQLQGQSYGFVFAGIITDILVIVFALRLQKTRKFMPAGLMTVLGVVTLLVIASQLFKAST	1805	yes	40.76	PF04932.15	O-Antigen ligase	0.007
WP_006196066	Nodularia spumigena CCY9414	Nodularia	2	WP_006196066_1	1	MNLSIIAALAYGILAVIGGIIGYIQANSQVSLFSGMISGLLLILAAYLQIQGLAWASILAVLVTLILVIFFALRLAKTRKFMPAGLMVILGMLALTLMVNQLVIGR	2016	yes	45.47	PF09900.9	Predicted membrane protein (DUF2127)	0.039
WP_010996620	Nostoc sp. PCC 7120 = FACHB-418	Nostoc	2	WP_010996620_1	1	MNLSVTAAIAYGMLALIGGIIGYFQANSQVSLLSGVFSGLLLFVAAYLQLQGQTWGLILATVVTAALVVFFALRLVRTRKFMPAGLMTILGMLSLVVLVNQMVAPK	2523	yes	47.68	PF14015.6	Protein of unknown function (DUF4231)	0.049
WP_013190653	Trichormus Nostoc azollae 0708	Trichormus	2	WP_013190653_1	1	MNLGIVVAFGYGILALVGGIIGYIQAKSKVSLLSGSISGFLIIFAAYSQLQGQTWGLTLAAFVTGILVVFFAFRLARTRKFMPAGLMIIFGILTLAIIVNQIFAS	2054	yes	34.62	PF09900.9	Predicted membrane protein (DUF2127)	0.0016
WP_015116255	Rivularia sp. PCC 7116	Rivularia	2	WP_015116255_2	2	MQSIIAASLYGILSIIGGIIGYKTAGSKVSLISGTISGLLLLIAAYLQLQGQVWGSTLAVIITSILVIVFAVRLTKTRKFMPAGLMVILGLVALFSMLSQLLFSV	2633	yes	25.53	PF13273.6	Protein of unknown function (DUF4064)	0.0069
WP_015216396	Anabaena cylindrica PCC 7122	Anabaena	2	WP_015216396_1	1	MNLSILATFGYGVLALVGGIIGYIQVKSKISLLSGSISGLLLIFAGYYQLQGQTWGLTLATLVTAILVVLFAFRFAKTRKFMPAGLMIIFGMLALAVMVRQIFG	1749	yes	42.71	PF03647.13	Transmembrane proteins 14C	7.7e-26
WP_016874828	Chlorogloeopsis fritschii PCC 6912	Chlorogloeopsis	2	WP_016874828_1	1	MALDIIAALVYGIITIIGGIIGYINASSNISLVSASICGLLLIFAAFARLQGQTWGLTLAAIVTAVLLVVFAFRLAKTRKFMPAGLMTILGMLTLAVMIHQFMALRR	2456	yes	31.46	PF13273.6	Protein of unknown function (DUF4064)	0.00017
WP_016950293	Anabaena sp. PCC 7108	Anabaena	2	WP_016950293_1	1	MNLGIVAAFGYGILSLLGGIIGYIQAKSKVSLLSGSMSGLLLIFSAYCQLQGQTWGLTVAAFITGILIFFFALRLAKTRKFMPAGLMIILGMLTLAVIINQIFVSK	2194	yes	38.42	PF13273.6	Protein of unknown function (DUF4064)	9.1e-05
WP_017315790	Mastigocladopsis repens PCC 10914	Mastigocladopsis	2	WP_017315790_1	1	MTLGVVAALAYGILAIVGGIIGYRKANSKVSLVSGSLSGLLLIIAAFVQLQGQTWGLILAAVVTAILVVFFALRVTKTRKFMPAGLMAILGVVALATMVNQLAVLR	2321	yes	48.17	PF12670.7	Protein of unknown function (DUF3792)	0.0054
WP_017320198	Cyanobacteria cyanobacterium PCC 7702	Cyanobacteria	2	WP_017320198_1	1	MTVDILAALAYGTIAIIGGIVGYIRANSKISLVSGSFCGLLLIFAAVMQLQGQTWGLLLAAAVTAGLLVFFAFRLAKTRKFLPAGLMTVLGMLALAVMVHALAAKK	2212	yes	31.74	PF03647.13	Transmembrane proteins 14C	8.7e-24
WP_026093360	Calothrix sp. PCC 7103	Calothrix	2	WP_026093360_1	1	MNLATIITFTYGILSIVGGIIGYKQAGSKISLISGAISGLLLIIAGILQLQGQSYGFVFAGVITAILVIVFALRLQKTRKFMPAGLMTVLGVVTLLVIASQIFKAST	1897	yes	40.15	PF04932.15	O-Antigen ligase	0.0096
WP_026732589	Fischerella sp. PCC 9605	Fischerella	2	WP_026732589_1	1	MNLGIIATLAYGIITLIGGIIGYVTAGSNVSLFSGSISGLLLIFAAFVQIQGETWGLILAAVVTAVLLVVFAFRLAKTRKFMPAGMMTVLGMLTLAVIVNQLTTSRS	2414	yes	41.13	PF09843.9	Predicted membrane protein (DUF2070)	0.0016
WP_027840959	Mastigocoleus testarum BC008	Mastigocoleus	2	WP_027840959_1	1	MTISVVSTILYGILGIIGGIVGYQKAGSKISLISGVVSGILLIVSGLVALQGQKWGLILGIAVAGILVIVFAVRFVKTRKFMPAGLMSILGLVVIFSILKNF	2808	yes	31.37	PF09843.9	Predicted membrane protein (DUF2070)	0.00012
WP_029637656	Tolypothrix [Scytonema hofmanni] UTEX 2349	Tolypothrix	2	WP_029637656_3	3	MNLGIIASIGYGILAIVGGIIGYVASGSNVSLLSGCISGVLLLFAAYLQFQSIIWGLIVAALVTAILVVVFALRLAKTRKFMPAGLMLFFGVLTLAVMVNQLMALRIK	2250	yes	32.17	PF13273.6	Protein of unknown function (DUF4064)	0.00011
WP_039742608	Hassallia byssoidea VB512170	Hassallia	2	WP_039742608_1	1	MNLGIIASLGYGFLAIVGGIIGYILSTSNVSLLSGCISGVLLLFAAYLQFQGIIWGLILAALVTAVLVVVFALRLAKTRKFMPAGLMLFFGVLTLAVMVNQLMASIISQ	2379	yes	30.71	PF13273.6	Protein of unknown function (DUF4064)	0.00015
WP_045869173	Fremyella diplosiphon NIES-3275	Fremyella	2	WP_045869173_2	2	MELGIVAAFVYGILALIGGIIGYVQASSKISLLSGSVSGLLLILAAFLQLQGQIWGLFVAAFITAALVVFFSLRLAKTRKFMPSGLMIILGVLALILMVNQMVGVK	2594	yes	39.79	PF13273.6	Protein of unknown function (DUF4064)	0.00058
WP_062294404	Nostoc piscinale CENA21	Nostoc	2	WP_062294404_2	2	MNLGIIAAFAYGIFAIVGGIIGYVQARSLVSLLSGGVSGLLLIFFAYWHLQGQPWGLTLAACVAGVLVVVFALRFAKTRKFMPAGLMIVLGALALVLMVHQLVVRKPDIC	2681	yes	40.31	PF09843.9	Predicted membrane protein (DUF2070)	0.0012
WP_066380047	Anabaena sp. 4-3	Anabaena	2	WP_066380047_1	1	MNLSIIAAIAYGILAIIGGIIGYLQANSQVSLLSGTVSGLLLIVAAYFQLQGQTWALIVATFVTAVLVVFFAMRLAKTRKFMPAGLMTILGMLALTVMVNQLVNFG	2637	yes	43.81	PF13273.6	Protein of unknown function (DUF4064)	4.6e-05
WP_071187741	Trichormus sp. NMC-1	Trichormus	2	WP_071187741_1	1	MNLGIVAAFGYGILSLVGGIIGYIQAKSKVSLLSGSISGLLLIFSAYCQLQGQTWGLTEEDAESGRRGDAESRLCPTFDANGFKPPTTSRGEEKRHSLLESLGFRHGV	2262	yes	24.47	PF03647.13	Transmembrane proteins 14C	7e-17
WP_073619367	Calothrix sp. HK-06	Calothrix	2	WP_073619367_1	1	MNLATIITFTYGILSIVGGIIGYKQAGSKISLISGAISGLLLIIAGILQLQGQSYGFVFAGVITAILVIVFAFRLQKTRKFMPAGLMTVLGVVTLLVIASQLFKASI	1830	yes	35.91	PF13273.6	Protein of unknown function (DUF4064)	0.003
WP_073631441	Scytonema sp. HK-05	Scytonema	2	WP_073631441_1	1	MTLGIVAALAYGILAIIGGIIGYRKANSKVSLISGIISGLLLMIAAFVHLQGQTWGLTLAAVITGVLIVVFGFRLVKTRKFMPAGFMTILGVLALATMVTQLAVLR	2720	yes	41.38	PF14015.6	Protein of unknown function (DUF4231)	0.021
WP_089092704	Nodularia sp. NIES-3585	Nodularia	2	WP_089092704_1	1	MNLSIIAALTYGILAIIGGIIGYIKANSQVSLFSGTISGLLLILAAYFQIQGQAWALILAVLVTVSLVIFFALRLAKTRKFMPAGMMVILGVLALTFMVNQLMIGR	1995	yes	50.03	PF04123.13	Domain of unknown function (DUF373)	0.00021
WP_095720237	Calothrix elsteri CCALA 953	Calothrix	2	WP_095720237_1	1	MNFAIVATFAYGILSIIGGIIGYIQVKSKVSLISGTISGLILVISAFLQLQRQGFALALAAVITGILVIVFAIRLQKTRKFMPAGLMTGLGITTLIIILSQLFVK	2327	yes	32.06	PF13273.6	Protein of unknown function (DUF4064)	0.00023
WP_096559440	Nostoc sp. NIES-4103	Nostoc	2	WP_096559440_1	1	MNLSIIAVLAYGILAIVGGIIGYIQANSKVSLFSGSISGLLLLLAAYFQFQGQSWALILAALVTGVLVVFFALRLAKTRKFMPAGLMTILGVLALVVMVNQLVAFK	2779	yes	41.22	PF13273.6	Protein of unknown function (DUF4064)	0.00019
WP_096561092	Scytonema sp. NIES-4073	Scytonema	2	WP_096561092_1	1	MTLGIVAALAYGILAIIGGIIGYRKANSKVSLISGIISGLLLMIAAFVHLQGQTWGLTLAVVITAVLIVVFGFRLVKTRKFMPAGFMTVLGVVALATMVTQQAVLR	2568	yes	40.06	PF09843.9	Predicted membrane protein (DUF2070)	0.00073
WP_096583741	Anabaenopsis circularis NIES-21	Anabaenopsis	2	WP_096583741_1	1	MNLSIIAAFAYGILAIVGGIMGYVQARSKVSLLSGGISGLLLILSAYWQLQGQPWGLTLAVCVTGVLVVVFALRFAKTRKFMPAGLMIVLGALTLAVMAHQLLGL	2461	yes	42.48	PF13273.6	Protein of unknown function (DUF4064)	0.018
WP_096659345	Calothrix parasitica NIES-267	Calothrix	2	WP_096659345_1	1	MQSIIAASLYGILSVIGGIIGYKSAGSKVSLISGTISGLLLLTAAFVQLQGQAWGLTLAVIITSILMVVFAIRLAKTRKLMPAGLMVILGLVTLVVMLLPNGVTG	2618	yes	43.86	PF13273.6	Protein of unknown function (DUF4064)	0.00052
WP_096680266	Nostoc sp. NIES-2111	Nostoc	2	WP_096680266_1	1	MNLSIIAAIAYGALTVIGGIIGYKQANSQVSLLSGIISGLLLFTAAYLQLQGNGWGLILATAVTGALVIVFAIRLAKTRKFMPAGLMTILGMLSLAVLVNQIVVSQ	2276	yes	52.52	PF13273.6	Protein of unknown function (DUF4064)	0.00014
WP_103138934	Nostoc sp. CENA543	Nostoc	2	WP_103138934_1	1	MNSSIIAAIAYGVLAIIGGIIGYFQAHSQVSLFSGLVSGFILLLAAYLQLQGQAWALILATCVTAVLVVFFALRLAKTRKFMPAGLMTILGMLALTVMVNQLVTVR	2369	yes	42.07	PF13273.6	Protein of unknown function (DUF4064)	0.038
WP_127056592	Trichormus variabilis SAG 1403-4b	Trichormus	2	WP_127056592_1	1	MNLGIVAAFGYGILSLVGGIIGYIQAKSKVSLLSGGISGLLLIFSAYCQLQGQTWGLTLASVITGILVVFFALRLAKTRKFMPAGLMIIFGMLTLAVMVNQIFVSKGLPEIKLSNFD	2415	yes	41.22	PF13273.6	Protein of unknown function (DUF4064)	0.00048
WP_162399305	Nostoc sp. B(2019)	Nostoc	2	WP_162399305_2	2	MNLGMIATLAYGILAIAGGIIGYIQANSQVSLISGSISGLLLLFAAYFQLQGQTWALILAVLVTSVLVVVFAFRLIKTRKFMPAGLMTILGMLTLAVMVNQIVVLR	3209	yes	42.36	PF13273.6	Protein of unknown function (DUF4064)	0.0016
WP_168491601	Anabaena sp. UHCC 0253	Anabaena	2	WP_168491601_1	1	MNLSIMVTFDYGIFILVGRILVKFR	1909	yes	-4.54	none	none	none
WP_169219905	Brasilonema sp. UFV-L1	Brasilonema	2	WP_169219905_1	1	MTLGIVAPLAYGILALIGGIIGYRQANSKVSLISGGISGLLLIIAAVVQLQGQTWGLTLAAVVTAVLVITFGVRLVKTRKFMPAGLMAILGLVALGTMVNQLVVLR	4916	yes	42.89	PF03647.13	Transmembrane proteins 14C	7.1e-27
AVH79662	Desmonostoc muscorum PCC 7121	Desmonostoc	3	AVH79662_4	4	MEANNKKCNNQIEIHDLIDEAVNNALARRNHVIDANEGLSNLSSEEAGNIVGGASTPAIAGFKPICPPIIIGLIATDPDVLKA	5375	yes	30.83	none	none	none
BAZ33272	Cylindrospermum sp. NIES-4074	Cylindrospermum	3	BAZ33272_2	2	MKANNRLEINDLIDDAVNNALARRNEALASVSDDEAKNIAGGALSNPIILGKIPVPITIGIIVVPTKTYYAQESSSLKLN	1963	yes	31.67	none	none	none
CNF13542	Mycobacterium tuberculosis	Mycobacterium	3	CNF13542_3	3	MVCRPPGSNWSCCPLTGIYDPNGLGAMLFAVLAVAATLEGQQAAAARGNHGGRPKVIDDDMLTFALALRAKGLPVPAIAAKLKITTGKNAGKPPSVASLYRALADADSRAEHRERERPRA	6200	yes	46.84	PF13565.6	Homeodomain-like domain	1.4e-05
RCJ40334	Nostoc punctiforme NIES-2108	Nostoc	3	RCJ40334_2	2	MNIHHKHFTSQIEITNLIEEAVVNASARRKQVLEQNSLSELSEEEQKNITGSGVATDVRDAIILLGGYLLG	1367	yes	33.19	PF16934.5	Two-component Enterococcus faecalis cytolysin (EFC)	9.6e-06
RCJ40334	Nostoc punctiforme NIES-2108	Nostoc	3	RCJ40334_1	1	MERNKKNSDIKFDISNLIDNAVNNAVARRNLAEDLEDTLLTLSDEEMANVAGGLATASLLKGPTIAGGIFVREPITCGIIAQNPNLSAQAF	2195	yes	42.77	PF01544.18	CorA-like Mg2+ transporter protein	4.9e-06
TCN71580	Streptomyces sp. BK387	Streptomyces	3	TCN71580_2	2	MHLGGQIRACYKGNVSGRSP	53	yes	-5.9	none	none	none
TVP63782	Nodularia sp. (in: Bacteria)	Nodularia	3	TVP63782_3	3	MAKNQSERHSQFEINDLIDDAVNNAVERRNQALDAEPALSGLSEEEAANISGGLVTKFAIAGYFPICPPITLGIIYIPPTITIK	4690	no	34.76	none	none	none
WP_012409787	Nostoc punctiforme PCC 73102	Nostoc	3	WP_012409787_2	2	MEAKERKYHSQIEVNDLIDDAVKNAVTRRNEVLDSEEALLSMSDEEAKSVSGGESKLVPIILGKIFIPPITIGLVAVDNSI	3979	yes	43.12	none	none	none
WP_012595952	Rippkaea orientalis PCC 8801	Rippkaea	3	WP_012595952_3	3	MNKHFGQIEIADLIEESVANAAIRRQQMAENSLVDVTEEEAKNIEGGSLNIRIPFIPPIILGLIFPPTIEF	4046	yes	42.18	none	none	none
WP_015216084	Anabaena cylindrica PCC 7122	Anabaena	3	WP_015216084_3	3	MEINNKHHNNQFEINDLIDEAVNNAVARRQETLLDLSDEEAKNVAGGASLSIKPIILGRIFCPPITIGIIAVDPKIQTI	6043	no	37.51	none	none	none
WP_073591536	Phormidium ambiguum IAM M-71	Phormidium	3	WP_073591536_3	3	MNHNQKFEITDLVNEAVSNAAVRRNQVLDSEEGLSSLSDEQAGSVTGGAIFNIKDIIIFGGFPFGLNRQINP	2221	yes	29.42	none	none	none
WP_073591536	Phormidium ambiguum IAM M-71	Phormidium	3	WP_073591536_5	5	MNHDRRKYHSQIEITDLVGQGNSILDSEEILSSLSDRQAKKVSGGNIVLLLQIIAGGYAPARIDIY	1265	yes	18.76	none	none	none
WP_073643028	Nostoc calcicola FACHB-389	Nostoc	3	WP_073643028_4	4	MESKNSNIRLEINNLIDDAVNNAVARRNLGEDSEDALLSLSDEETANVAGGLASISLLRVPIICGLIALPQLPQIDKTSFY	2504	yes	28.43	none	none	none
WP_073643028	Nostoc calcicola FACHB-389	Nostoc	3	WP_073643028_1	1	MSMNIHQKHLTNQIEISNLIEEAVVNASARRNQVLDTQEVLSELSEDEQKNITGGGVARDVIDTIIRIGGYLLG	1676	yes	41.57	NF000539.0	plantaricin: plantaricin C family lantibiotic	9.8e-06
WP_086760950	Nostoc sp. RF31YmG	Nostoc	3	WP_086760950_5	5	MEKHKKSYNGHLEINSLIDDAVNNAIARRNQGLVSEDALAAVSDEEAKNVAGGLASTTTTIGLIAKPPIIVGIIAIPTETI	4786	yes	45.91	PF13273.6	Protein of unknown function (DUF4064)	3.1e-06
WP_087592205	Cyanobacteria unicellular cyanobacterium SU3	Cyanobacteria	3	WP_087592205_3	3	MNEHLGKHLGELEIADLIEESVANAAQRRQQFVEDSLVDITEDEAKNIEGGLSFTPLVYPDPTTLGIIIEPCCTTVGLIAIDPTLSK	4581	yes	52.45	none	none	none
WP_087592205	Cyanobacteria unicellular cyanobacterium SU3	Cyanobacteria	3	WP_087592205_5	5	MKEKLTENLTQIQLDDLISESVENARSRRQKTMELEDDLRELSVQEVRHIKGGLSRDIITMGYFAR	2313	yes	28.51	PF06698.11	Protein of unknown function (DUF1192)	3.2e-06
WP_096589596	Calothrix sp. NIES-2098	Calothrix	3	WP_096589596_5	5	MEKHQRNYKGHLEINSLIDDAVNNAIARRNQGLDSEDALLDVSDEEAKNVAGGLASTTIGLIAKPPIIVGIIAIPTPTI	4544	yes	44.83	none	none	none
WP_096679519	Nostoc sp. NIES-2111	Nostoc	3	WP_096679519_3	3	MQTNSNISHQIEINDLIDNAVNNALVRRNPDLDTDSNLLDVSNEDAEKVLGGQIRPIISGFISPIPPITVGLIVINDDVLKA	5428	yes	34.17	none	none	none
WP_103138325	Nostoc sp. CENA543	Nostoc	3	WP_103138325_7	7	MQSMRNIFLMNKFTSVDKNMETNNRNFKNQIEINDLIDAAVSDALARRSGNDDNLSDLSGEDADHVTGGIASLTIAGYKPIPPIIKPICPPITVGIIALPGKEIM	2472	no	24.12	none	none	none
WP_104899482	Nostoc sp. Peltigera membranacea cyanobiont N6	Nostoc	3	WP_104899482_1	1	MEAKERKYNSQIEINDLIYGAVQNAVTRRNEVLDSEEALSSMSDEEAKSVAGGALKVDTIILGKIFIPPITIGLVAVDYI	3458	yes	49.48	none	none	none
WP_104899482	Nostoc sp. Peltigera membranacea cyanobiont N6	Nostoc	3	WP_104899482_3	3	MSSEMNQRYTKSQIEITDLIAEAVVHASARRKQVLDAQESLSELSDEEEKGINGGSLIRIIIGLIFVD	2589	yes	33.47	PF15208.6	Rab15 effector	1.3e-06
WP_106371152	Chlorogloea sp. CCALA 695	Chlorogloea	3	WP_106371152_2	2	MSANINQRKCNSQIEITDLIAEAVQNASARRNQVLDAKEPLLAFSEEEANGIMGGQVGKADYTTCGIISCDPPFLS	1656	yes	34.98	PF03395.14	Poxvirus P4A protein	1.5e-05
WP_106371152	Chlorogloea sp. CCALA 695	Chlorogloea	3	WP_106371152_6	6	MNRNQRNHKGQVEINDLIDVAVNNAVFRRKGIIDSEDALSDEQAGNIAGGSIVEKIIYFGGYLLGQIN	2415	yes	19.12	PF00269.20	Small, acid-soluble spore proteins, alpha/beta type	5.2e-06
WP_124970176	Aphanothece sacrum FPU1	Aphanothece	3	WP_124970176_8	8	MNENLRNHLGQVEIADLIEASVANAALRRQQVLEDSLIDISDEESKNIEGGLAFLPPIVLGIFYPDPFPIGIILKDPIIPKF	6951	no	26.27	PF03222.13	Tryptophan/tyrosine permease family	1.2e-06
WP_138498533	Nostoc sp. PA-18-2419	Nostoc	3	WP_138498533_1	1	MERKNSNMRLEINNLIDDAVNNAVARRNLGEDSEDTLLNLSDEETAKVEGGIASVSLVKIPIICGLIALPRVLPQINQTSVY	1847	yes	37.2	none	none	none
WP_167721203	Tolypothrix sp. PCC 7910	Tolypothrix	3	WP_167721203_4	4	MEKRKSNYDGHLEINSLIDDAVNNAIARRNQGLDAEDALLEDVSTEEAKNVAGGLATTTIGLIIKPPITIGIIAIPNPTI	4737	yes	45.43	NF033629.0	RiPP_CPAC: RiPP peptide	5.5e-06
WP_168643398	Dolichospermum sp. UHCC 0259	Dolichospermum	3	WP_168643398_3	3	MEINKKNQFEINDLIDESVSNAVARRSEALDSVENLSDEEAKNVTGGALIKPIILGRIFWPPITTGIIVVNPVKF	4856	yes	35.49	PF05840.13	Bacteriophage replication gene A protein (GPA)	1.9e-05
AVH79456	Roholtiella [Tolypothrix] sp. PCC 7415	Roholtiella	4	AVH79456_1	1	MSLENVRAFYEKLVNDEAFRTQMQAVESKDECSQVVKSAGFDFTQEEFEEYTTQLLESNAAEGELKDLGEKELEAVFGGILGKPIIQPLYGVTWWPPIKWPPIYPQPLYGIVTTNDI	4137	no	57.8	PF07862.11	Nif11 domain	1.9e-18
AVH79456	Roholtiella [Tolypothrix] sp. PCC 7415	Roholtiella	4	AVH79456_2	2	MSLENVRAFYERLASDEAFRNQIQSVESKDAGREILQNAGFDFTPAEFEEYTEQLLETNAANDDLKDLNPQELEAVFGGAIPVLFPGILPILMYGVVITQIRGLL	4531	no	56.14	PF07862.11	Nif11 domain	8.1e-18
AVH79607	Nostoc sp. PCC 9205	Nostoc	4	AVH79607_1	1	MSFENVRAFYERLANDEAFRTQIQGVESKEAGLEILQNSGYIFTPDEFEEYTANLLETNAAESELRDLDEQELEAVFGGITSILRFPFPVLLYGVVISRLPWILR	5625	no	50.28	PF07862.11	Nif11 domain	7.5e-17
AVH79628	Nostoc sp. PCC 9201	Nostoc	4	AVH79628_1	1	MSFENVRAFYEKLVKDEVFRTQMQQVESKDECSRIVKEAGYDFTQEEFEEYTAQLLESNANEGEIRDLNDQELETVFGGASSLVGSKPVYQPMYGVIFWPPEKWPPVQPLYGVVLDT	4384	yes	60.28	PF07862.11	Nif11 domain	8.2e-18
AVH79662	Desmonostoc muscorum PCC 7121	Desmonostoc	4	AVH79662_1	1	MSFENVRAFYEKLVSDEAFRSQMQQVESKDECSRLVKEAGYDFTPEEFEEYTAQLLESNPDDGEIRDLNDQELETVFGGVSSLIGSKPIYQPMYGVIFWPPEKWPPVQPLYGVVLSQD	4530	yes	54.99	PF07862.11	Nif11 domain	1.5e-18
TVP63782	Nodularia sp. (in: Bacteria)	Nodularia	4	TVP63782_1	1	MSLEHVKFFYETIAKDEHFRAQVQGATSKDECSQIVKSAGYDFTQEEFEEYTLQLLESTANEGELQDLSEKELAAVVGGATTALVGSILPYMVLLYGLPPINLLPRNTL	3845	no	57.4	PF07862.11	Nif11 domain	1.8e-16
TVP63782	Nodularia sp. (in: Bacteria)	Nodularia	4	TVP63782_2	2	MSLENVKGFYEQLANDETFRTQIQGVQSKDECSQVVQSAGYDFTQQEFEEYTIQLLESTANKGELQDLSEKELEAVFGGFLGKPVIRPLYGVITWPPMPWEPQPQPLYGVVNSEF	3473	no	51.51	PF07862.11	Nif11 domain	1.4e-17
WP_012409787	Nostoc punctiforme PCC 73102	Nostoc	4	WP_012409787_1	1	MSLEHVKAFYQKLANDEAFSNQIQGVNSKEECSQIVKAAGYDFTLEEYEEYTAQLLESADGEGELKDLSEKELAAVFGGLTGKPRIQPLYGVVWPPYQLMYGVIRVDDTL	3008	yes	64.23	PF07862.11	Nif11 domain	2.9e-19
WP_012409787	Nostoc punctiforme PCC 73102	Nostoc	4	WP_012409787_8	8	MPIKNVKAFYENLANDEAFRHQIESVNSKEQCNQIVKTRDR	2726	yes	17.26	PF07862.11	Nif11 domain	1.6e-12
WP_012595952	Rippkaea orientalis PCC 8801	Rippkaea	4	WP_012595952_2	2	MSFENVRAFYERLAQDVEFRSELQEVKTKEECSQFVQQAGYNFTEEEFETYTSRLLEASQKEGELQDLDERELEAVFGGVSHAFFPLIPILLYGVVFLKDQM	3274	yes	55.88	PF07862.11	Nif11 domain	4.7e-18
WP_012595952	Rippkaea orientalis PCC 8801	Rippkaea	4	WP_012595952_1	1	MSLVDVKSFYQRLAKDEAFRTQLQEVTSKEECSQLVQASGYNFTQEEFESYTSELLESSLNEGDLQDLNEKELEAVFGGASSRIGRGKIQPLYGVIWPPEYVQPLYGVVISE	2920	yes	57.5	PF07862.11	Nif11 domain	4.7e-18
WP_012597836	Gloeothece citriformis PCC 7424	Gloeothece	4	WP_012597836_1	1	MSLQNVEAFYQRMTTDPEFSNQVQQAKTSEERIKVIRNEGYYFTQEEFDEYTDKFLMSKFEEGELVDLSERELDAVLGGLKGSFPKAIALYGIPPYLY	2889	yes	52.24	PF07862.11	Nif11 domain	2.1e-19
WP_015216084	Anabaena cylindrica PCC 7122	Anabaena	4	WP_015216084_1	1	MSLENVKAFYKQLASDEDFRTQIEGVENKEECSQIVKAAGYDFTQAEYEEYTYQLLESANSEGEVQDLGEKELAAVFGGIIGRPKIQPLYGVVWPPFQLLYGVIRPDDTLA	4742	no	57.05	PF07862.11	Nif11 domain	3.8e-19
WP_015216084	Anabaena cylindrica PCC 7122	Anabaena	4	WP_015216084_2	2	MSLENVRDFYERLATDDDFRNQIQGVESRELGRQILQDSGYNFSPEEFEEYTEQLLESSNSDDSLRVLSEQEAEAVIGGFFPIFPILLYGVVISQIKYIL	5135	no	53.68	PF07862.11	Nif11 domain	3.1e-15
WP_086760950	Nostoc sp. RF31YmG	Nostoc	4	WP_086760950_1	1	MSLENVRAFYERLASDEAFRNQIQSVESKDAGREILQNAGFDFTPAEFEEYTEQLLETNAANDDLKDLNPQELEAVFGGAIPVIFPGVLPILMYGVVITQIRGLL	3979	yes	62.84	PF07862.11	Nif11 domain	8.1e-18
WP_086760950	Nostoc sp. RF31YmG	Nostoc	4	WP_086760950_2	2	MSLENVRAFYEKLASDEAFRSKMQTVESKDECSQVVKSAGFDFTQEEFEEYTTQLLESNAAEGDLKDLGEKELEAVFGGILGKPIVQPLYGVIVWPPIKWPPIYPQPLYGVVTTTDI	3585	yes	61.65	PF07862.11	Nif11 domain	4.9e-18
WP_087592205	Cyanobacteria unicellular cyanobacterium SU3	Cyanobacteria	4	WP_087592205_4	4	MSVKNVKAFYQRLSDDEAFRAGLQTVRNKEECSQFVKKAGYDFTQEEFESYTAELLESSENETKFQDALEELEQQELAAVFGGLTRNDVTIYGLPFKLF	2937	yes	44.51	PF07862.11	Nif11 domain	1.2e-18
WP_087592205	Cyanobacteria unicellular cyanobacterium SU3	Cyanobacteria	4	WP_087592205_2	2	MSVGNVKAFYQRLAQDEQFRSELSEVKSKEECSQLVQQAGYNFTQEEFENYTSELLESSFNKDELSDLNEKELEAVFGGASSQISSPTIQPMYGIITWPPKDWGPQPLYGVIVDEPLF	3756	yes	59.38	PF07862.11	Nif11 domain	2.6e-18
WP_087592205	Cyanobacteria unicellular cyanobacterium SU3	Cyanobacteria	4	WP_087592205_1	1	MSLESVKAFYQRLAKDEEFRSRLEGLETSEQSSQLLQQAGYNFTEEEFENYTAELLESNLNEGDLKDLNEQELEAVFGGMTPFPPIEALYGVIAPSFPGPIPFPGPFPFSGNTP	3371	yes	62.39	PF07862.11	Nif11 domain	6.5e-18
WP_096589596	Calothrix sp. NIES-2098	Calothrix	4	WP_096589596_2	2	MSLENVRAFYERLASDEAFRNQIQSVESKDAGREILQNAGFDFTPAEFEEYTEQLLETNAANDDLKDLNPQELEAVFGGAIPVIFPGVLPILMYGVVITQIRSLL	3737	yes	60.53	PF07862.11	Nif11 domain	1.1e-17
WP_096589596	Calothrix sp. NIES-2098	Calothrix	4	WP_096589596_1	1	MSLENVRAFYEKLASDEAFRSQMQAVESKDECSQVVKSAGFDFTQEEFEEYTTQLLESNGAEGELKDLGEKELEAVFGGILGQPIIQPLYGVIVWPPIKWPPIYPQPLYGVVTTTDI	3344	yes	61.73	PF07862.11	Nif11 domain	1.3e-18
WP_096679519	Nostoc sp. NIES-2111	Nostoc	4	WP_096679519_1	1	MSFENVRAFYERLANDEAFRTQMQQVKSKDECSQTVKAAGYDFTQEEFEEYTSQLLESDANDGELKDLSEQELEAVFGGTTTYFRKPIVQPLYGIVWEPPIYQPLYGVVITTEGF	4371	yes	62.34	PF07862.11	Nif11 domain	2e-17
WP_103138325	Nostoc sp. CENA543	Nostoc	4	WP_103138325_1	1	MAFENVRAFYERLANDEAFRSQMQQVESKDECSQVVKAAGFEFTQTEFEEYTTQLLESAAGEGELRDLDEQELEAVFGGASSLLDKIRIQPLYGVIVWPPKPPYAQPLYGVIVSEEF	1617	no	67.6	PF07862.11	Nif11 domain	1.7e-15
WP_124970176	Aphanothece sacrum FPU1	Aphanothece	4	WP_124970176_1	1	MSLAQVKSFYEQLAKDEAFRSQIQNVESKEQCSQIVKAAGYDFTLEEYEEYTYQLLESAAGEGEIQDLGEKELAAVFGGLTGRPEIQPLYGVIVWPPKECPPQPLYGVIISPK	5545	no	66.86	PF07862.11	Nif11 domain	4.9e-18
WP_167721203	Tolypothrix sp. PCC 7910	Tolypothrix	4	WP_167721203_1	1	MSLENVRAFYERLVSDDTFRTQMQGVESKDECSQVVKSAGYDFTQEEFEEYTTKLLESNAPDQDLTDLSEQELEAVFGGILGKPIIQPLYGVVVWPPIKWPPIYPQPLYGVVTTDGV	3488	yes	59.58	PF07862.11	Nif11 domain	2.1e-17
WP_167721203	Tolypothrix sp. PCC 7910	Tolypothrix	4	WP_167721203_5	5	MSLENVRAFYERLASDEAFRVQIQGVESKDVGRELLQNSGFDFTQSEFEEYTEQLLAKSASNDDLKDLNEQELEAVFGGAIPVIFPGGLPILMYGVVITSIRWLF	3906	yes	44.95	PF07862.11	Nif11 domain	8.4e-15
WP_168643398	Dolichospermum sp. UHCC 0259	Dolichospermum	4	WP_168643398_2	2	MSLGSVRDFYKQLVADDDFRNQIQNVENKEECSQIVKAAGYDFTQEEYEEYTLKLLESVNSDNELQDLGEKELAGVFGGITGWPKIQPLYGVIRPPMQLLYGVIIDNTLI	3528	yes	62.52	PF07862.11	Nif11 domain	1.1e-16
WP_168643398	Dolichospermum sp. UHCC 0259	Dolichospermum	4	WP_168643398_1	1	MSLENVRAFYEKLACDEGFRSQIQEVDNKEVGREILEASGYNFTQEEFEEYTEQLLESGNSPEGLRDLNEKELEAVFGGATSVLLPIGFPILLYGVVISKIGRIL	3925	yes	63.62	PF07862.11	Nif11 domain	4.4e-14
CEJ45116	Chrysosporum ovalisporum	Chrysosporum	5	CEJ45116_4	4	MTEEDFDINQPAETIIDIDAPNYRQIITAIFAGNYSWACILFLHLLDCIPTKYIPPQIYLKLLEDNFIPHISKQNQADKFNK	255	yes	29.41	none	none	none
RCJ14929	Nostoc sp. ATCC 43529	Nostoc	5	RCJ14929_5	5	MNQDFSEFNEGLNKKFNFTHQELEEIIKAVRDGKYSWACLLMLRFSGYNPLEYIPSRTYIRLMKRNCLFSRTDNQNIGFFQLESTWFQHSSDRHGSN	168	yes	28.78	none	none	none
RCJ30949	Nostoc minutum NIES-26	Nostoc	5	RCJ30949_12	12	MNEEFSNCSQPLNKIISSEEWEPIIKAIVAGKYSWACVLILHVIGLNPIEYIPYRTYMRLLKNNCILDKSSKNKTNGMKLQFFTIKSRWTELSSSKLE	266	yes	18.46	none	none	none
TAE59458	Nostocales cyanobacterium	Nostocales	5	TAE59458_4	4	MIQEKFNNNQNCDQGLKSPHWQEIIQAIINCKYSWACVLFLRFSGYEPSEYIPYKVYKQLVKENSSVNLDNSNYSHHQSVKSSIFRIY	65	yes	31.91	none	none	none
TVP62740	Nodularia sp. (in: Bacteria)	Nodularia	5	TVP62740_5	5	MTEENSDMNQPAENIISAESWRQIIKAIIVGKYSWACVLFLHFMGYEPTKYICRLTYLKLLENNFILPISQPNQADK	163	yes	19.24	PF03187.14	Corona nucleocapsid I protein	5.8e-06
WP_010996095	Nostoc sp. PCC 7120 = FACHB-418	Nostoc	5	WP_010996095_3	3	MTQESFQHHQLCNCTILTEEWEAILQAISVGKYSWACVLMLHTAGYNPLTYIPYRTYIRLLKNNSMPDTIKTRKLQHIGAKFVAIKIKMMELD	150	yes	27.65	none	none	none
WP_011321056	Trichormus variabilis 0441	Trichormus	5	WP_011321056_7	7	MTQEYFRHHQLCDCTILTEEWEAILQAISVGKYSWACVLMLHTAGYNPLTYIPYRTYIRLIKNNSIPNTIKTRKLHNMGVKFVAIKTEVIELD	152	yes	25.86	none	none	none
WP_013190203	Trichormus Nostoc azollae 0708	Trichormus	5	WP_013190203_2	2	MIKGNYEQNKQFNKILQQSQFREIIKAIILGKYSWACILFLHFSGCDPLDYIPHETYSKLIRENYIFAEDNHDSIHENKLRLPGIKLSWINLNNENHSSN	124	yes	30.05	none	none	none
WP_015127932	Calothrix sp. PCC 7507	Calothrix	5	WP_015127932_5	5	MSQENSESNQQSDKIIQIEQVEQIIKAVLAGKYSWACVLFLHFVGYNPLKYIPYRTYIRLLKNNCLLGKMHSNKIEKNNVELVDIKSNWIHLSSSGHGSN	176	yes	28.25	none	none	none
WP_015210601	Cylindrospermum stagnale PCC 7417	Cylindrospermum	5	WP_015210601_1	1	MTQENFELNEPLDKIFKPEEFEQVVKAIIGGKYSWACFLILHFAGYNPIDFIPYRTYIRLLKKNCQVGGEKFYATEHRKLEPLSAWVRLGGDKHGSN	48	yes	39.04	none	none	none
WP_015212417	Anabaena cylindrica PCC 7122	Anabaena	5	WP_015212417_7	7	MIQENFEQKQQLDQIFDHSQFQQIIKAIILGKYSWACILFLHFSGYDPQDYIPQETYHKLLQENFIFTEVNHHPTHHRKLKFPHIKLSWIKLNTSKHSSN	223	yes	27.09	none	none	none
WP_016950446	Anabaena sp. PCC 7108	Anabaena	5	WP_016950446_4	4	MIQKSFDQNQRLDKIFKYTQFQQIIKAIILGNYSWACVLFLHFSGYDPLEYIPHETYSNLLKENCILGDDNHHGTDESKLKLSNIKLSWIKLKNSKHSSK	112	yes	34.44	none	none	none
WP_026100063	Fortiea contorta PCC 7126	Fortiea	5	WP_026100063_9	9	MNPENIESNQPTNKIIQTEQVEQIIKAVLAGKYSWACVLFLHFVGYNPIKYIPYRTYIRLLKNNCLLGKNHNNKNVEFVEIKSEWMQINNTNHGAN	35	yes	23.26	none	none	none
WP_057178590	Cylindrospermopsis raciborskii GIHE 2018	Cylindrospermopsis	5	WP_057178590_6	6	MIPENFEQKQESEKIDITFQHIQIQQIIHAIIAGKYAWACILFIYFSGRDPLHYIPQEIYTKLVRDNFPPVSTNRELTTDKKLSS	144	yes	30.55	PF03838.14	Recombination protein U	4.4e-06
WP_069073064	Nostoc sp. KVJ20	Nostoc	5	WP_069073064_2	2	MNYMTQEFSTSNELLDNKFKFNHEELEHIVKAVSVGKYSWACVLILRFSGYNPLEYIPSRTYIRLMKNNWLLSKANRRQTDNRNLGLFQLESSWIQMGIGKGRSNDSREKGTENREQA	74	yes	35.11	none	none	none
WP_071189061	Trichormus sp. NMC-1	Trichormus	5	WP_071189061_1	1	MIQENFEQNNRLDKIFKPTQFQQIIKAIILGNYSWACVLFLHFSGYDPLEYIPYETYNNLLKENCILGDDNHRTNEKKMKLSNIKLSWIKLSKGKNSSK	112	yes	33.86	none	none	none
WP_073644071	Nostoc calcicola FACHB-389	Nostoc	5	WP_073644071_3	3	MSQEFFDSNEAFNNKINFNHEELEEIIKAVKDGKYSWACVLMLRYSGYNPLEYIPSRTYIRLMKKNCLFDKTNLYQTDNQNVGFFHLESTWFQQNSDRHSSN	207	yes	31.82	none	none	none
WP_096536886	Nostoc linckia NIES-25	Nostoc	5	WP_096536886_2	2	MSQDFSEFNESSNIKNNFTHQELEEILKAVRDGKYSWACLLMLRFSGFNPLEYIPYRTYIRLMKRNFLFGRTDNQNLGFFQIESTWFQQGSDKHGAN	293	yes	32.2	none	none	none
WP_096569967	Sphaerospermopsis kisseleviana NIES-73	Sphaerospermopsis	5	WP_096569967_7	7	MIQENFEQNQQLDKIFKDAQFQQIIKAIILGKYAWACVLFLHFAGCDPLDYIPHEIYSQLIQDNYIFTGDKQHLKQDKKLEFSGLKVNWGKFTSSKHSSN	99	yes	31.64	none	none	none
WP_096681247	Nostoc sp. NIES-2111	Nostoc	5	WP_096681247_10	10	MTQKVFSSHQISECLILTEEWEAILKAIASGKYSWACILMLYTVGHNPLTYIPYSTYLRLVKKNNMPNVIKARKNNSTGVKFVAIKTKVMELD	119	yes	29.36	none	none	none
WP_099071810	Nostoc linckia z15	Nostoc	5	WP_099071810_4	4	MNEDFPDFDENLHRTAIFNHQELEEIINAIKNGKYSWACLLMLRFSGFNPLEYIPSRTYIRLMKNNWVFDKSEHQNLGFFQLESTWFQQSNDKHSSN	156	yes	33.99	PF07443.13	HepA-related protein (HARP)	4.3e-06
WP_138499068	Nostoc sp. PA-18-2419	Nostoc	5	WP_138499068_3	3	MAQQLSESDEILTPKFHFNHEELEHILRAVTLGKYSWACVLILRFISYDPLKYIPSRTYIRLIKSNCLLGKINRQQADTQNFGLLKLESTWIQQGYGKRSSK	40	yes	41.5	none	none	none
WP_018960901	Streptomyces sp. CNB091	Streptomyces	6	WP_018960901_2	2	MTTMMDRQVLDFTTLTEREREVLALLAGGEQNRWLARRLGITERTVRAHTSSIVRKLNLKSRFEAAIVSNLYAEDIRGLRP	6281	yes	37.52	PF09862.9	Protein of unknown function (DUF2089)	5.2e-05
WP_031017311	Streptomyces sp. NRRL WC-3795	Streptomyces	6	WP_031017311_1	1	MAVAVQDKAHDISTSGASAGVSALDVSAPRLSGLDFSALTGRELEVLLLLATGEQNRRLARRLGIAERTVRAHTASIVRKLGLTTRFEAAIVAHLYADDIRGARG	5826	yes	63.07	PF09862.9	Protein of unknown function (DUF2089)	4.1e-05
WP_044377254	Streptomyces badius	Streptomyces	6	WP_044377254_1	1	MTMMADERMRTGGRAGAADGGRPEMDFATLTERELEVLVLLASGEQNRWLARRLGITERTVRAHTTSIVRKLNLKSRFEAAIVSYLHAEDIRGHQGAASVI	6183	yes	50.07	PF09862.9	Protein of unknown function (DUF2089)	4.8e-05
WP_051746348	Streptomyces scopuliridis RB72	Streptomyces	6	WP_051746348_1	1	MGEARLTLSRHTVIVTASIVRRIRGIE	1190	no	-23.7	none	none	none
WP_051840194	Streptomyces lavendulae subsp. lavendulae	Streptomyces	6	WP_051840194_5	5	MNHEHSTGEVALKPLTENHPLDFSCLTGREVEVLLLLASGEQNRRLARHLGIAERTIRAHTASIVRKLRLKSRFEAAIVAHLYADDIKDLETTQQRSAA	6001	yes	35.15	PF04545.16	Sigma-70, region 4	7.2e-05
WP_058047489	Streptomyces sp. MBT76	Streptomyces	6	WP_058047489_2	2	MRSAIAEGQHDFTTLTDREVEVLLLLASGEQNRRLARRLGIAERTVRAHTANIVRKLDLRSRFEAAIVSHVYAEDIRSLCSTGGRVAA	6051	yes	38.19	PF09862.9	Protein of unknown function (DUF2089)	2.6e-05
WP_073726342	Streptomyces sp. CB02414	Streptomyces	6	WP_073726342_2	2	MGILLTETAAAPAGPDQLVADAGSETAMCGCEGPPTLSFDTSGVSRLTGREREVLLLVAAALPNGTIARRLGIAERTVKAHVSSIVEKLRVASRLEAALLVHLHHELICPE	7140	yes	46.55	PF08281.12	Sigma-70, region 4	1.1e-09
WP_093908736	Streptomyces sp. cf386	Streptomyces	6	WP_093908736_2	2	MTVVVREDALDFAALTDREREVLLLLATGEQNRWLARRLGIAERTVRAHTASIVRKLDLKSRFEAAIVSHLYADDIRGHDTDGRAAA	5945	yes	52.09	PF09862.9	Protein of unknown function (DUF2089)	6.1e-05
WP_096622718	Streptomyces sp. WZ.A104	Streptomyces	6	WP_096622718_4	4	METAVTAMADERMTVDERMTAGGRTAAHGRAMAGGRQAMDFAALTERELEVLVLLASGEQNRWLARRLGITERTVRAHTSSIVRKLNLKSRFEAAIVSYLHAEDIRRAASVT	6233	yes	35.36	PF09862.9	Protein of unknown function (DUF2089)	1.2e-05
WP_097866484	Streptomyces sp. rh34	Streptomyces	6	WP_097866484_2	2	MTAMTDRQVLDFTTLTEREREVLALLAGGEQNRWLARRLGITERTVRAHTSSIVRKLNLKSRFEAAIVSNLYAEDIRGLRP	5972	yes	37.76	PF09862.9	Protein of unknown function (DUF2089)	4.6e-05
WP_107115831	Streptomyces globisporus C-1027	Streptomyces	6	WP_107115831_3	3	MTMMADERMRTGGRAGDAVGGRPEMDFATLTERELEVLVLLASGEQNRWLARRLGITERTVRAHTSSIVRKLNLKSRFEAAIVSYLHAEDIRGHQGAASAI	6115	yes	48.61	PF09862.9	Protein of unknown function (DUF2089)	4.2e-05
WP_114054648	Streptomyces globosus	Streptomyces	6	WP_114054648_2	2	MLGGAVHDPRGIGTLTERERQVLALLGQGLANRVIARRLGIVERTAKAHVASIVEKLGVSSRLEAALMAHLHHELLCPRETVPTDTSPRANGRHLQRGC	6712	yes	25.04	PF08281.12	Sigma-70, region 4	4.1e-08
WP_120754718	Streptomyces klenkii	Streptomyces	6	WP_120754718_2	2	MSTTTAEARHDFTTLTEREVEVLLLLASGEQNRRLARRLGIAERTVRAHTANIVRKLDLRSRFEAAIVSHVYADAIRASAPDGRPRGCVAV	5861	yes	37.73	PF09862.9	Protein of unknown function (DUF2089)	2.3e-05
WP_124271963	Streptomyces sp. ADI96-02	Streptomyces	6	WP_124271963_2	2	MEETAVISMTERPVLDFAMLTERELEVLVLLASGEQNRWLARRLGIAERTVRAHTTSIVRKLNLKSRFEAAIVSHLYAEDIRGLRP	6094	yes	42.46	PF09862.9	Protein of unknown function (DUF2089)	3.7e-05
WP_125506282	Streptomyces sp. WAC 01420	Streptomyces	6	WP_125506282_1	1	MRTMARTDMLKERPSECHCTGDSALFSRDFLSSLRGLTARERQILLRLAACEGNRGIARRFGITERTVKAHLTSILTKLALTSRTEATVVALRYHGQLCPAVHGDAMDQSPIAGIGCCPR	1626	yes	19.51	PF07037.11	Putative transcription regulator (DUF1323)	1.1e-05
WP_126393842	Streptomyces sp. MK-45	Streptomyces	6	WP_126393842_2	2	MTVVVREDALDFSALTDREREVLLLLATGEQNRWLARRLGIAERTVRAHTASIVRKLGIKSRFEAAIVSHLYADDIRGACG	6014	yes	49.76	PF09862.9	Protein of unknown function (DUF2089)	4.9e-05
WP_141310912	Streptomyces spinoverrucosus	Streptomyces	6	WP_141310912_2	2	MAVVVQEHAPDFTALTDREREVLLLLATGEQNRRLARRLGIAERTVRAHTASIVRKLALTSRFEAAIVSHLYADDIRGARG	6069	yes	51.52	PF09862.9	Protein of unknown function (DUF2089)	3.9e-05
WP_157857956	Streptomyces durhamensis	Streptomyces	6	WP_157857956_2	2	MTVVVQDAAPDFSTLTEREREVLLLLATGEQNRWLARRLGIAERTVRAHTASIVRKLDLTSRFQAAIVSHLYADDIRADHG	6324	yes	54.8	PF09862.9	Protein of unknown function (DUF2089)	3.5e-05
WP_158686821	Streptomyces sp. CNT372	Streptomyces	6	WP_158686821_3	3	MMSHAAESCGCALFRGAVHDARGIAKLTDRERQVLTLLGQGLPNRLIARRLGIVERTAKAHVASIVDKLGVSSRLEAALMAHLHHDLLCPEKPCPDGHLPKGQ	6923	yes	7.29	PF08281.12	Sigma-70, region 4	2.7e-09
WP_159688203	Streptomyces sp. Tu 2975	Streptomyces	6	WP_159688203_2	2	MDAKSHAACRCECALLQGAVNDVRGFAKLTDRERQVLTLLGQGLANRLIARRLGIVERTAKAHVSSIVEKLGVSSRLEAGLMAHLHHELLCPAGHCPEGHLTNDQ	6989	yes	10.78	PF09802.9	Preprotein translocase subunit Sec66	1.3e-05
WP_159770677	Streptomyces sp. HM190	Streptomyces	6	WP_159770677_3	3	MAVAVREDALDFSALTDREREVLLLLATGEQNRWLARRLGIAERTVRAHTASIVRKLDLKSRFEAAIVSHLYEDDIRQTCG	6562	yes	50.81	PF09862.9	Protein of unknown function (DUF2089)	7.4e-05
AVH79456	Roholtiella [Tolypothrix] sp. PCC 7415	Roholtiella	7	AVH79456_6	6	MPTDYLPPAESSLNQSPAELDSQEPLLPRLAWNSQITYLRVIFKAKKALDRIEKEAGLVGIAN	2448	no	22.64	PF02757.17	YLP motif	7.6e-06
AVH79607	Nostoc sp. PCC 9205	Nostoc	7	AVH79607_6	6	MSINSQDSETSSQVEPILPRSAWNSQIAYLKVLFRAKKALERIEQEAANNKPEV	3567	no	9.62	none	none	none
AVH79628	Nostoc sp. PCC 9201	Nostoc	7	AVH79628_6	6	MDNNSVSNPVDSNLNLSPNDSQSQVNSANFLLPRSAWSSQVAYLRVIFRTKKALDRIEQEAKYEYSNLK	2814	yes	17.86	none	none	none
AVH79662	Desmonostoc muscorum PCC 7121	Desmonostoc	7	AVH79662_6	6	MDNNSVSNPTDGNLKLLPDESQNQINSANFLLPRSAWSSQVAYLRVLFRAKKALDRIEKEAK	2857	yes	14.07	none	none	none
BBD66616	Nostoc commune HK-02	Nostoc	7	BBD66616_5	5	MDNISTDIPSENTTVSDSQATVLPRSPWNSQLAYLRVIFRAKKALDRIEKEAGVLRNEN	821	yes	21.88	none	none	none
TVP63782	Nodularia sp. (in: Bacteria)	Nodularia	7	TVP63782_7	7	MSTKEMNSNLDSSSNQTQAELNSPEPLLPRSAWNSQLAYLRLVFRAKKALDRIEDEPNHLK	1922	no	11.43	none	none	none
WP_012409787	Nostoc punctiforme PCC 73102	Nostoc	7	WP_012409787_6	6	MSSKFIPPEDPNITHIEQSQNEVEPLLTLLPRSAWNSQLNYLRLIFRAKKALDRIEKEAGIFKSYN	1203	yes	19.48	none	none	none
WP_012595952	Rippkaea orientalis PCC 8801	Rippkaea	7	WP_012595952_4	4	MEKSLIESSGLERTPENEAAKQPILPRSAWNSNIAYLRTLFKVKKALDKIEEEAGIIEK	1321	yes	34.14	none	none	none
WP_012597836	Gloeothece citriformis PCC 7424	Gloeothece	7	WP_012597836_8	8	MEKTEQSFNEPLLPRSAWSNNLTYLQTLFKAKKALDRIEKESGIIRRKNS	1322	yes	22.09	none	none	none
WP_015216084	Anabaena cylindrica PCC 7122	Anabaena	7	WP_015216084_11	11	MNNIDLDSVATEDTNTLASEDSSDTPQRLLPRLAWDSQTTYLRLIFRAKKALDRIETEAGISRF	3085	no	18.09	none	none	none
WP_019501037	Pseudanabaena sp. PCC 6802	Pseudanabaena	7	WP_019501037_4	4	MASFIPLEPAERSTSDLTLLPRDPWPNQLQYLLLVFQAKQALERVEKAFILN	3996	yes	13.45	none	none	none
WP_086760950	Nostoc sp. RF31YmG	Nostoc	7	WP_086760950_10	10	MNDSSTDYLPTTDGDRSPLELDSQEPLLPRLAWNSQIAYMRVVFKAKKALDRIEKEAGILSINK	2022	yes	22.25	none	none	none
WP_087592205	Cyanobacteria unicellular cyanobacterium SU3	Cyanobacteria	7	WP_087592205_7	7	MEKNLIESNQKSNQAILPRSAWVSNVAYLRALFKAKKALDRIEEEAKITHKSNSFY	1340	yes	23.33	none	none	none
WP_096589596	Calothrix sp. NIES-2098	Calothrix	7	WP_096589596_11	11	MNDSSTDRLPTTDGDRSPSELDSQEPLLPRLAWNSQIAYMRVVFKAKKALDRIEKEAGILSINK	1783	yes	23.57	none	none	none
WP_096679519	Nostoc sp. NIES-2111	Nostoc	7	WP_096679519_5	5	MEINSESSNKNLGSIPTTNNLETLANDSQLLGNADEFLLPRSAWNSQVAYLRAVFRAKKALDKIELAAEWLPNVKS	2778	yes	31.43	none	none	none
WP_103138325	Nostoc sp. CENA543	Nostoc	7	WP_103138325_9	9	MSTNITNSETSVQNISQTQVEPSLPRSAWNSQLAYFKVMFRAKKALDRIEKEAGIENNYS	61	no	15.8	PF08996.10	DNA Polymerase alpha zinc finger	2.4e-06
WP_104899482	Nostoc sp. Peltigera membranacea cyanobiont N6	Nostoc	7	WP_104899482_6	6	MNNISTDSLASENITVPESQVTLLPRSAWNSQLAYLRIIFRAKKALDRIEKEAGVCKS	2009	yes	21.71	none	none	none
WP_124970176	Aphanothece sacrum FPU1	Aphanothece	7	WP_124970176_5	5	MEKSLIESNKLEETSENKDLKQPILPRSAWNSNIAYLRALFKVKKALDRIEEEAGIINRE	3895	no	30.4	none	none	none
WP_167721203	Tolypothrix sp. PCC 7910	Tolypothrix	7	WP_167721203_9	9	MNDSSINSLPKTDVDQSPADLDSPAPLLPRLAWNSQIAYMRVVFKAKKALDRIEQEAGTLGKY	1897	yes	24.68	none	none	none
WP_168643398	Dolichospermum sp. UHCC 0259	Dolichospermum	7	WP_168643398_8	8	MNNISPDSITLENPNTLAKSESSSDTPQHLLPRLAWDSQITYLRLLFRAKKALDRIEKEAGISINR	1668	yes	20.05	none	none	none
BAZ29283	Cylindrospermum sp. NIES-4074	Cylindrospermum	8	BAZ29283_6	6	MVRITISDLYPSRDEQFIDELSAGEMLAVAGGSRRRRRRRQRGSSTGDTAEVTNIMDQIDNRIDQIGSDLNQTNEDLQKQFGY	3800	yes	24	PF17230.2	Family of unknown function (DUF5304)	3.3e-06
WP_009343975	Cylindrospermopsis raciborskii CENA303	Cylindrospermopsis	8	WP_009343975_3	3	MDIKISDLYPNGDGDLLQEVTPGEMVNIKGGVRRRRRNPNSVESVDISQVLGRVNDNLERWRAEIDDTLDELRDSVTF	2702	yes	31.34	PF12658.7	Telomere capping, CST complex subunit	2.7e-05
WP_010996095	Nostoc sp. PCC 7120 = FACHB-418	Nostoc	8	WP_010996095_2	2	MVRITISDLSPDDEGKSLKDLTTWELKSVYAGLERRYGGRRNRVAEPSEESTPPTLNDTNGTLDRWMDSLELQIQDLRQQLGINS	3634	yes	35.17	none	none	none
WP_011321056	Trichormus variabilis 0441	Trichormus	8	WP_011321056_6	6	MVKITISDLSPDDEGKSLKDLTTWELKSVYAGLERRYGGRRNQVAEPSEESTTPTLNDTNGTLDRWMDSLELQIQDLRKQLGINS	4689	yes	32.01	PF09278.11	MerR, DNA binding	8e-06
WP_012409362	Nostoc punctiforme PCC 73102	Nostoc	8	WP_012409362_10	10	MIVISNLHPNNDVNLITELTDWEMRTVEGGRRRSRRDDEDTATTLSTQKVKETVNDWLSKMEEQIVDLRKQLTGLQ	5139	yes	15.19	none	none	none
WP_013190203	Trichormus Nostoc azollae 0708	Trichormus	8	WP_013190203_3	3	MGIQIYDLYSTHEVQMIDKLTSSEMKNINGGIMNRRRRDRNPTTTDRSNLSALVADIKTNVGNWRLELNKTIDNLREERLDF	2341	yes	27.78	PF18864.1	AbiTii	3.4e-06
WP_015127932	Calothrix sp. PCC 7507	Calothrix	8	WP_015127932_6	6	MSVITISDLDSIREEQLLTELNIWEMSNIEGGRRRRRRGSTSEVNTSGILSKDQINQTVNQWLDNVDIQIADLREQLSG	3943	yes	26.14	none	none	none
WP_015210601	Cylindrospermum stagnale PCC 7417	Cylindrospermum	8	WP_015210601_4	4	MVSITISDLYPTKDEQLLDELSHDEMKTVAGGTRRRRRRGSNSVDTEDVATVIQSLDDQIQQMTINLNETSAKLRSQLGI	2921	yes	17.57	PF04604.13	Type-A lantibiotic	6.6e-05
WP_015212417	Anabaena cylindrica PCC 7122	Anabaena	8	WP_015212417_5	5	MIGIKIYDLYPGNDAQFLDEQTSLEMTNIQGGLTNVFNNNNGRGRRRSEPSTTTGGSSSSDLSALIEDINTSLAAWRLELNGSLDNLRQGLSF	3477	yes	28.4	none	none	none
WP_016950446	Anabaena sp. PCC 7108	Anabaena	8	WP_016950446_5	5	MCLNSIQNSMEGGDSNMNIKIYDLCPSSKVQMLNELSLREMRTIKGGIQMGEDENTATRNNFAEVMKEVNGNIAIWRTEIDETLKNLRQGMNF	2941	yes	33.76	none	none	none
WP_026100063	Fortiea contorta PCC 7126	Fortiea	8	WP_026100063_8	8	MVKIKVYDLSPDESGKFINELNAWDMKTVYAGYIGWDRRYSRETPPVAQPEEPNTPIVDKANANLAQWMDSLEVQIKDLRKQFGISQ	4559	yes	39.28	none	none	none
WP_057178590	Cylindrospermopsis raciborskii GIHE 2018	Cylindrospermopsis	8	WP_057178590_7	7	MDIKISDLYPNGDGDLLQEVTPGEMVNIQGGVRRRRRNSNSVESGDISQILGRVNDNLERWRVEIDDTLDQLRDSVTF	2653	yes	27.7	none	none	none
WP_066383651	Anabaena sp. 4-3	Anabaena	8	WP_066383651_7	7	MVKIIISDLSPSDDQKFIHDLTLWEMMNVYAGLERRYGRRRNSNPAPIEEASPASMPDTNAILSQWMDNLDLQLKDLRGQLGIPQ	4415	yes	32.72	none	none	none
WP_069073064	Nostoc sp. KVJ20	Nostoc	8	WP_069073064_3	3	MVRITISDLHPIGEDKQFDELTDQEMKTVEGGARRRRRGSRTSVSDPSGIVTELNDRFDNWMDILNNKLGDVQTEIVESL	4221	yes	32.4	PF18430.1	Putative DNA-binding domain	0.0001
WP_071189061	Trichormus sp. NMC-1	Trichormus	8	WP_071189061_5	5	MGIQIYDLYSSSEVQLIHDLTAAQMKNINGGIAYRRGRNRRTSTTDSSERSALLQDVNTSVQNWRLELNQTLDNLGQTELEF	2899	yes	22.75	none	none	none
WP_096569967	Sphaerospermopsis kisseleviana NIES-73	Sphaerospermopsis	8	WP_096569967_9	9	MGIKIYDLYPNHDAQFIQEATLGEMINIKGGFGRRRRRDPSTTLESSDISALMEDINTNLDRWRMDIDTTLEDLRQSINF	3766	yes	26.98	none	none	none
WP_096681247	Nostoc sp. NIES-2111	Nostoc	8	WP_096681247_9	9	MVRIKISDLSADDEGKHISELAAWEIKKVYAGMPRRFGTDSLSDTPKETPLENSSENSGFSFNGMSGNISGLMDNLEVQLRDIRSRLGI	4090	yes	37.28	none	none	none
WP_103136595	Nostoc sp. CENA543	Nostoc	8	WP_103136595_4	4	MGKIKIYDLFPENEDKFIQELSSWEMKGIYAGSEPRYGYGRRPPVQEEEPTSVTVADANNTLDRWLNNLELQIQDLRRQLGVPR	2987	yes	42.51	PF13276.6	HTH-like domain	3.5e-05
WP_114082527	Nostoc sp. ATCC 53789	Nostoc	8	WP_114082527_8	8	MILISNLHPNSDVNLLTELTDWEMRTVEGGRRRRSTRDEEDTSGALSRENIKETVNDWLSNIEQQIVDLRQQLTGLQ	4318	yes	20.43	none	none	none
WP_138499068	Nostoc sp. PA-18-2419	Nostoc	8	WP_138499068_7	7	MTRIIISNLQVPNSEENLLTELTIWQMRSVEGGIRRITKEDNSGMLSSENIKQTVSDWLANIDKQIVDLRNQLSV	4174	yes	23.58	none	none	none
EES41370	Staphylococcus caprae M23864:W1	Staphylococcus	9	EES41370_3	3	MENILFNGYSRYTTSNHIQRSALEERDLGDGRTSSISASVSYTVTWSAA	1146	yes	5.93	none	none	none
WP_016898474	Staphylococcus capitis	Staphylococcus	9	WP_016898474_1	1	MENILINGYSHYTSSNNIQRSAIEERDLGDGRTSSISASVSYTVTWSAA	1155	yes	13.77	none	none	none
WP_017569537	Nocardiopsis halotolerans DSM 44410	Nocardiopsis	9	WP_017569537_2	2	MDKNITQDLLEGYTAYSAPAEIQNETLAGSRLNNVGTSVSLSVSYSVSVSWSVSWT	2254	yes	49.16	none	none	none
WP_027975917	Streptococcus devriesei DSM 19639	Streptococcus	9	WP_027975917_4	4	MSKSFLNGYTNYTTPSEVQKSVIEDSKLGNVGTSVTVTVSWSWSVTVSWTVG	2196	yes	8.72	none	none	none
WP_030061393	Staphylococcus capitis	Staphylococcus	9	WP_030061393_1	1	MENILINGYSHYTSSNNIQRSAIEERDLGDGRTSSISASVSYTVTWSAA	1163	yes	16.96	none	none	none
WP_037567380	Staphylococcus agnetis	Staphylococcus	9	WP_037567380_3	3	MKNLLFDGYSNYTTSNDIHKCAVEECELGNVGTSISLSVTYSASVSWTVTWSA	2162	yes	21.51	none	none	none
WP_068208510	Rathayibacter tanaceti	Rathayibacter	9	WP_068208510_2	2	MERSLLSGYTAYASPTEIQSIVLNDAELGDVGTSVSLSVSVSYSLSFSWSWSWT	2418	yes	29	none	none	none
WP_068252194	Rathayibacter tritici	Rathayibacter	9	WP_068252194_2	2	MERSLLSGYTAYASPTEIQSIVLNDAELGDVGTSVSLSVSVSYSLSFSWSWSWT	2387	yes	29.58	none	none	none
WP_088612422	Bacillus amyloliquefaciens	Bacillus	9	WP_088612422_2	2	MKNLISGYTAYTSPVEVQKSANEENQLGNVGTSLSLSVSVSYSVSWSWSVSF	2221	yes	10.83	none	none	none
WP_088679810	Bacillus subtilis subsp. subtilis	Bacillus	9	WP_088679810_1	1	MKNLISGYTAYTSPVEVQKSANEENQLGNVGTSLSLSLSVSYSASVSWSWSVSF	2216	yes	9.02	none	none	none
WP_096547181	Staphylococcus delphini	Staphylococcus	9	WP_096547181_5	5	MKDLLFNGYSNYTTANNIQKCAVEECELGNVGTSISLSVTYSASVSWTITWSV	2188	yes	16.29	none	none	none
WP_102695456	Lactobacillus iners	Lactobacillus	9	WP_102695456_1	1	MEKSILDGYTTYTTPAEVQKSAVEDNQLGNVGTSITVSVSYSASVSWTFSWSF	2193	yes	21.63	none	none	none
WP_103031749	Bacillus subtilis	Bacillus	9	WP_103031749_1	1	MKNLISGYTAYTSPVEVQKSTNEENLLGNVGTSVSLSVVSVSWSATWSF	2218	yes	11.9	none	none	none
WP_104263878	Rathayibacter iranicus NCPPB 2253 = VKM Ac-1602	Rathayibacter	9	WP_104263878_2	2	MERSLLSGYTAYASPTEIQSIVLNDAQLGDVGTSISISVSYSLSFSWSWSWT	2415	yes	9.77	none	none	none
WP_105988468	Lactobacillus timberlakei	Lactobacillus	9	WP_105988468_5	5	MIFIKTNNLLKGYVSYTTPLDVQKSAVEENRLGNVGTSVSLSVSYSASVSWSWSWSF	2087	yes	10.12	none	none	none
WP_107397356	Staphylococcus capitis	Staphylococcus	9	WP_107397356_1	1	MKSLLLNGYKNYTSASEIQKNAVDDSELGNVGTSVSLSVTYSASVSWTVSWSA	2178	yes	22.15	PF16442.5	Domain of unknown function (DUF5039)	4.3e-06
WP_129202808	Xylanimonas allomyrinae	Xylanimonas	9	WP_129202808_2	2	MHNVLGGYTAYASPSEIQNIALNEAELGNVGTSVSLSVSYSLSLSWSWSWT	2270	yes	34.58	none	none	none
WP_162681093	Staphylococcus sp. MI 10-1553	Staphylococcus	9	WP_162681093_4	4	MKDLLFNGYSNYTTANNIQKCAVDECELGNVGTSISLSVTYSYSISWTITWSV	2195	yes	15.59	none	none	none
BAN83919	Streptomyces olivoviridis	Streptomyces	10	BAN83919_1	1	MTEKTQITDVQAFEDLVAKVQEMDGPAQASSTVAALAGLDAAELQNFLEEKSGISPDEEAQGSVMAAAASIALHC	2718	yes	41.52	NF033415.1	thiovirid_RiPP: thioviridamide family RiPP peptide	5.2e-32
BBC15200	Streptomyces sp.	Streptomyces	10	BBC15200_1	1	MSEAMVSAVDEAAFADLVSKIQDAEASMTDEQRAVIDPAAGEKALEELAGVSPEELQAFLEEKAGISPDEEAQGSVMAAAATVAFHC	1171	yes	54.49	NF033415.1	thiovirid_RiPP: thioviridamide family RiPP peptide	2.1e-40
WP_017595611	Nocardiopsis potens DSM 45234	Nocardiopsis	10	WP_017595611_9003	9003	MPAVTQNIEELAAQIKAAEAEVVADQGEALDLSSLTGLDEAELQTLLESKSGISADEDAQGSVMAAAASVAAHC	8938	yes	61.68	NF033415.1	thiovirid_RiPP: thioviridamide family RiPP peptide	8.8e-33
WP_018962004	Streptomyces sp. CNB091	Streptomyces	10	WP_018962004_1	1	MSETATTQVDEAAFGDLVSKIKEAELAMTDEQRSVIDPAASEKALEELAGVSPEDLQAFLEEKAGISPDEEAQGSVMAAIATVAYHC	1173	yes	38.53	PF12917.7	HD containing hydrolase-like enzyme	1e-05
WP_020634200	Amycolatopsis alba DSM 44262	Amycolatopsis	10	WP_020634200_1	1	MNSHDDAVAPSISDQDIENLVAQITTAETATTEDGLSLSDVSGFSEEELQRFLEEKAGLTAASGVQQSVIGFAVTIAVHC	1112	yes	62.31	NF033415.1	thiovirid_RiPP: thioviridamide family RiPP peptide	2.6e-23
WP_030193573	Streptomyces sp. NRRL S-87	Streptomyces	10	WP_030193573_1	1	MSEAMASAVDEAAFADLVSKIQAAEASMTDEQRAVIDPAAGEKALEELAGVSPEELQAFLEEKAGISPDEEAQGSVMAAAATVAFHC	1172	yes	65.96	NF033415.1	thiovirid_RiPP: thioviridamide family RiPP peptide	2.5e-40
WP_039653089	Streptomyces sp. MUSC 125	Streptomyces	10	WP_039653089_1	1	MSEAMVSAVDETAFADLVSKIQDAEASMTDEQRAIIDPASGEKALEELAGVSPEELQAFLEEKAGISPDEEAQGSVMAAAATVAFHC	1180	yes	56.06	NF033415.1	thiovirid_RiPP: thioviridamide family RiPP peptide	6.9e-41
WP_044449646	Mastigocladus laminosus UU774	Mastigocladus	10	WP_044449646_1	1	MSDSIDNVMNQLPLSEEELRELMNRIKQVEAGSMQLHEVAGVSPEELQEFLENKAGLSPEEESQGSPMAAAVSIAYHC	1139	yes	25.25	PF14338.6	Mrr N-terminal domain	0.0043
WP_046417231	Streptomyces malaysiense	Streptomyces	10	WP_046417231_1	1	MSEAMVSAVDETAFADLVSKIQDAEASMTDEQRAVIDPASGEKALQELAGVSPEELQAFLEEKAGISPDEEAQGSVMAAAATVAFHC	1184	yes	70.7	NF033415.1	thiovirid_RiPP: thioviridamide family RiPP peptide	1.1e-40
WP_065960366	Streptomyces sparsogenes DSM 40356	Streptomyces	10	WP_065960366_1	1	MSEAMVSAVDEAAFADLVSKIQDAEASMTDEQRAVIDPAAGEKALEELAGVSPEELQAFLEEKAGISPDEEAQGSVMAAAATVAFHC	1183	yes	60.3	NF033415.1	thiovirid_RiPP: thioviridamide family RiPP peptide	2.1e-40
WP_091117926	Micromonospora eburnea	Micromonospora	10	WP_091117926_2	2	MTAPAQNIEELISQIQADESNTAAAVDSIDASFSELAGVSSEELQKFLEEQVGMNPDEGVQGTFVSVVVTPATHC	1984	yes	39.68	PF04940.12	Sensors of blue-light using FAD	0.01
WP_106236741	Nonomuraea fuscirosea	Nonomuraea	10	WP_106236741_1	1	MTAIVPEHNLDEIVAQIRAEESAADFDTSETAFSELAGVSPEDLQQFLEEQVGLSPDEGIQGSFTGIIVTAGVHC	1094	yes	64.13	NF033415.1	thiovirid_RiPP: thioviridamide family RiPP peptide	1e-28
WP_129307706	Streptomyces sp. L2	Streptomyces	10	WP_129307706_1	1	MTEKTQITDVQAFEDLVAKVQEMDGAAEASSTVAALAGLDAAELQTFLEEKSGISPDEEAQGSVMAAAASVALHC	2511	yes	39.53	NF033415.1	thiovirid_RiPP: thioviridamide family RiPP peptide	2.7e-31
WP_131980220	Actinomadura sp. 6K520	Actinomadura	10	WP_131980220_1	1	MATLWSGERDRRAPAEWGVMEKNEDVVTASVPEADIEKLVQQIQADDAANAELGEVDLSFAEISGLSDEELQKFLEEKASVTAASGVQQSVIGFAVTIGVHC	1118	yes	61.43	NF033415.1	thiovirid_RiPP: thioviridamide family RiPP peptide	3.7e-22
WP_159037419	Streptomyces sp. NRRL S-4	Streptomyces	10	WP_159037419_1	1	MSETTTAAQVDEVAFSDLVSKIKEAELAMTDEQRAVIDPAAGEKALEELAGVSPEDLQAFLEEKAGISPDEEAQGSVMAAIATVAYHC	1175	yes	57.19	NF033415.1	thiovirid_RiPP: thioviridamide family RiPP peptide	1.4e-40
WP_161634174	Nocardiopsis potens DSM 45234	Nocardiopsis	10	WP_161634174_2	2	MPAVTQNIEELAAQIKAAEAEVVADQGEALDLSSLTGLDEAELQTLLESKSGISADEDAQGSVMAAAASVAAHC	259	yes	61.68	PF09660.10	Protein of unknown function (DUF2397)	9.4e-06
CNF13542	Mycobacterium tuberculosis	Mycobacterium	11	CNF13542_1	1	MTAPVTGTPTAPKESSYDPRTVQSLNDALHGLDGFTEFTAAAQGFIKGEIDLEQAIEVMTPFLRGDIVQGEQERERIIQLGQTIEAQCSWASVTATITACTPTFSCSIICC	1597	yes	62.87	PF18495.1	Antitoxin VbhA	8.1e-07
CNF13542	Mycobacterium tuberculosis	Mycobacterium	11	CNF13542_5	5	MTSEDSVPDSYDLLEQIRLELLSIDGMADFAGAASGFIRGELELDEAAAVMTRFLRGDGYGDADERNRVIQLAQTVEARCGFVAITVSISACTAAFSCSLACC	1146	yes	25.89	none	none	none
PZN45587	Actinobacteria bacterium	Actinobacteria	11	PZN45587_1	1	MSTSQLELTGVAEKTADPQVMKDVANALHSMRGYTEFAAAANGFLKGDIDLERAVEAMIPFLQGEICKGADQRERLLQLGQTLQEKCGWVSITASITGCTPAFSCSIICC	1639	yes	45.19	none	none	none
WP_030452416	Herbidospora cretacea	Herbidospora	11	WP_030452416_4	4	MTSVTATLPAVEEKTADPQVMKDVNDALMGISGFAEFSAATNGFLKGDIDVEQALEAMGPFLRGEICRDEADRERMIQLGQTIEAKCGWASVLATLTACTAAFSCSGFCC	1685	yes	51.87	PF10507.9	Transmembrane protein 65	9.9e-06
WP_030452416	Herbidospora cretacea	Herbidospora	11	WP_030452416_3	3	MPENVEGNSVPEGYDILEQINLELKSIDGAADYRAAALGFIKGDLELDDAIEAMTRVLHGDGYGNAEHRRRIIELAQTAEERCGFITITVSIAGCTAAFSCSMGCC	1142	yes	56.72	none	none	none
WP_062348671	Herbidospora yilanensis	Herbidospora	11	WP_062348671_4	4	MTSVTVALPAVEEKTADPQVMKDVNDALMGISGFAEFSAATNGFLKGDIDVEQALEAMAPFLRGEICRDEADRERMIQLGQTIEAKCGWASVLATLTACTAAFSCSGFCC	1671	yes	51.73	PF10507.9	Transmembrane protein 65	9.2e-06
WP_062348671	Herbidospora yilanensis	Herbidospora	11	WP_062348671_3	3	MPENVEGNSVPEGYDILEQINLELKSIDGAADYRAAALGFIKGDLELDDAIEAMTRVLHGDGYGNADHRRRIIELAQTAEERCGFITITVSIAGCTAAFSCSMGCC	1143	yes	52.42	none	none	none
WP_062437448	Herbidospora daliensis	Herbidospora	11	WP_062437448_4	4	MKDVNDALMGISGFAEFSAATNGFLKGDVDVEQALEAMAPFLRGEICRDEADRERMIQLGQTIEAKCGWASVIATLTACTAAFSCSGFCC	1691	yes	51.21	PF10507.9	Transmembrane protein 65	3.4e-06
WP_062437448	Herbidospora daliensis	Herbidospora	11	WP_062437448_3	3	MPEGYDILEQINLELKSIDGAADYRAAALGFIKGDLELDDAIEAMTRVLHGDGYGNADHRKRIIELAQTAEERCGFVTITVSIAGCTAAFSCSMGCC	1142	yes	55.93	none	none	none
WP_131969051	Actinomadura sp. KC06	Actinomadura	11	WP_131969051_2	2	MTAPVTTTTATVTEQSRGPQAVRDLNDALHGIDGFSEFNAAAQGFIKGEIGIEQAIEVMTPFLQGDIVQDEQERERLIQLGQTIEAQCGWVSVTASVTACTPTFSCSVICC	1652	yes	46.9	PF02435.16	Levansucrase/Invertase	2.1e-06
WP_131969051	Actinomadura sp. KC06	Actinomadura	11	WP_131969051_3	3	MTSEDSMTESRDLLEEIRLELLSIDGMADFATAASGFIHGEVELEEATAVMTRFLRGDGYGDADERSRVIELAQTIEARSGFVAITVSISACTAAFSCSLACC	1190	yes	43.54	none	none	none
WP_137248807	Herbidospora galbida	Herbidospora	11	WP_137248807_4	4	MTSVTATLPAVEEKTADPEVMKDVNEALMGISGFAEFSAATNGFLKGDVDMEQALEAMAPFLRGEICRDEADRERMIQLGQTIEAKCGWASVLATLTACTAAFSCSGFCC	1681	yes	51.42	PF10507.9	Transmembrane protein 65	9.2e-06
WP_137248807	Herbidospora galbida	Herbidospora	11	WP_137248807_3	3	MPEGYDILEQINLELKSIDGAADYRAAALGFIKGDLELDDAIEAMTKVLHGDGYGNAEHRKRIIELAQTAEERCGFVTITVSIAGCTAAFSCSMGCC	1141	yes	55.57	none	none	none
WP_161483240	Herbidospora sp. NEAU-GS84	Herbidospora	11	WP_161483240_4	4	MTSVTATLPAVEEKTADPQVMKDVNDALMGISGFAEFSAATNGFLKGDIDVEQALEAMAPFLRGEICRDEADRERMIQLGQTIEAKCGWASVLATLTACTAAFSCSGFCC	1673	yes	51.37	PF10507.9	Transmembrane protein 65	9.2e-06
WP_161483240	Herbidospora sp. NEAU-GS84	Herbidospora	11	WP_161483240_3	3	MPENVEGNSVPEGYDILEQINLELKSIDGAADYRAAALGFIKGDLELDDAIEAMTRVLHGDGYGNAEHRRRIIELAQTAEERCGFITITVSIAGCTAAFSCSMGCC	1142	yes	55.23	none	none	none
RCJ30949	Nostoc minutum NIES-26	Nostoc	12	RCJ30949_8	8	MSKIIICELHPSDVKTFLQELTPAQAETVCGGGSPYIYITNMTDEVTINGSGYNGGDNTVEAGTNSVSYHDNKINTTDYSRSNYNIFF	2123	yes	23.47	none	none	none
RCJ30949	Nostoc minutum NIES-26	Nostoc	12	RCJ30949_11	11	MTKTLISDFCSTDIGLFLQDLTPVQANTVRGGSNTISVINISDGVNNTVNTYEGSDSFNYRDNKVYTVDYSRSNYNLFYISD	2542	yes	20.65	none	none	none
RCJ30949	Nostoc minutum NIES-26	Nostoc	12	RCJ30949_7	7	MSTTVNSGLHSLKINKLFYDLTSVEMATAVGGSNLTLNNIQGGINNKSDKSSVNSIDGNKLFTIDFSGLTLNFIFLIDIF	3030	yes	24.27	none	none	none
WP_015210601	Cylindrospermum stagnale PCC 7417	Cylindrospermum	12	WP_015210601_3	3	MTTIVITDLHPIDEKTFLHELTSEQINAISGNGILTLWSNDPDIALSTFHDGMNNTSTTYHSPFGLYDNKIFTVDFSRMTIYLVI	2658	no	17.62	none	none	none
WP_015210601	Cylindrospermum stagnale PCC 7417	Cylindrospermum	12	WP_015210601_5	5	MDKLVISDLHPTDIDSFLYDLYPAQAKTILGGLLSDQYPNARILTIHGDTNSRSTTYEGAGNYHDNKINTVDYSRSTYVWYRSW	3216	no	16.72	PF16356.5	Domain of unknown function (DUF4983)	3e-06
WP_096559014	Nostoc sp. NIES-4103	Nostoc	12	WP_096559014_9	9	MAKIVISDLHPLDAKTFLHDLDLEEIDAVSGNGLVPGDNDSSNLQLTTIQDGVNNTSYKSGSLFNISDNKFFTLDFSRLTVYFII	1861	no	15.29	none	none	none
WP_137906310	Dolichospermum planctonicum	Dolichospermum	12	WP_137906310_3	3	MATIIISDLETIDKNTFLYDLNSEEIQQIVDTDILPLSGGFDLNFLLTTIQDVITNQTSSDNGLFGSNSRNNKIFSLDFSNPSLYLVTK	1078	no	22.19	PF13415.6	Galactose oxidase, central domain	0.00019
WP_137906310	Dolichospermum planctonicum	Dolichospermum	12	WP_137906310_2	2	MERLVINNFDYTDLESFIYDLKQIESNIVLGGLVWGDYPNWGGTPNVFVMTIYDGLNTISTTYEGAGNFHDNKFHTIDYARTVNAWVSH	1790	no	33.49	none	none	none
WP_137906310	Dolichospermum planctonicum	Dolichospermum	12	WP_137906310_6	6	MATIIISDLQLLEKKTFLYDLNSQQITQISGSIFLPLWDRPAVHLSTVYDGINNPQTTYEGPFGFHDNKIFAIDFSKLSGYLVI	1471	no	13.85	none	none	none
WP_168357543	Dolichospermum planctonicum UHCC 0167	Dolichospermum	12	WP_168357543_2	2	MERIVINNFDSTDLESFIFDLKQIESSIVLGGLVWGDYPNWGGTPNVFVMTIYDGLNSISTTYEGAGNFHDNKFHTIDYGRTVNAWVSH	1790	no	33.09	none	none	none
WP_168357543	Dolichospermum planctonicum UHCC 0167	Dolichospermum	12	WP_168357543_6	6	MATIIISDLQLLEKKTFLYDLNSQQITQILGSIFLPLGDRPAVHLSTVYDGINNPQTKYEGPFGFHDNKIFAIDFSKLSGYLVI	1471	no	16.9	none	none	none
WP_168357543	Dolichospermum planctonicum UHCC 0167	Dolichospermum	12	WP_168357543_4	4	MATIIISHLETIDKNTFLYDLTSEEIQQIVATGILSSWGGSDLDFLLNTIQDAITNQTSSDDGLFASVARNNKIFSLDFSNPSLYLVTK	1078	no	21.53	PF16359.5	RcsD-ABL domain	5.9e-06
WP_168501874	Anabaena sp. UHCC 0187	Anabaena	12	WP_168501874_1	1	MERIVIYDLYPTHTETFIDDLEPKELNIILGGIFWRNNPNWGLNPNILINTVYDGINTVSTTYEGGNNFRDNKINTVDYSRTANIRIYR	1526	no	27.57	none	none	none
WP_168501874	Anabaena sp. UHCC 0187	Anabaena	12	WP_168501874_2	2	MATIIISDLQFIEQKTFLYDLTSEQAEEILGTGILTGFLPFGRSSDVLITTVYDGINSVESAYRGPFSFSDNKIFTLDFSRTALYLIV	1185	no	22.45	none	none	none
WP_015659226	Streptomyces davaonensis JCM 4913	Streptomyces	13	WP_015659226_1	1	MSDPQVPPALDKEIHHPTRLTVAAFLSGCAEAEFSAVRDYCGVSDSVLSKTVTALEKAGYVSVRKGYFGKRPRTWLSLTFTGRRALAAHLAALEQIAGAARRAGAEGAPPEA	1090	no	62.62	PF12840.7	Helix-turn-helix domain	5.1e-08
WP_016570561	Streptomyces albulus	Streptomyces	13	WP_016570561_3	3	MIDPAFDEVIHAPNRLRICTTLATVDAMEFSVVRDALMVSDSVLSKHVKVLQTASYVSVTKVRGSHPRTWLALTPEGRQALAGHIAELRHIVEMAQADQ	3792	no	32.74	PF12840.7	Helix-turn-helix domain	5.9e-11
WP_052856102	Streptomyces kasugaensis	Streptomyces	13	WP_052856102_1	1	MTDAAFDEVIHAPNRLRICTTLAAVDAMEFSVVRDALKVSDSVLSKHVKVLQAASYVTVTKVRGDSHPRTWLALTPEGRRALAGHITELRRIVEMAEAEG	3784	no	52.87	PF12840.7	Helix-turn-helix domain	1.9e-12
WP_054237388	Actinobacteria bacterium OK006	Actinobacteria	13	WP_054237388_2	2	MTVPDTGSSLDPTIQHPTRLALVAFLSGCAEADFKTVRERLQMSDSALSKTVAALETAEYVSVRKGYVGKRPRTWLALTFDGRRRLAAHLMALQSIADQARAQAQD	1218	no	44.25	PF01022.20	Bacterial regulatory protein, arsR family	1.3e-05
WP_060892878	Streptomyces europaeiscabiei	Streptomyces	13	WP_060892878_2	2	MTGPMIPPALDKEIHHPTRLAVAAFLSGCAEAEFGVVRDYCGVSDSVMSKTVTALEKAGYVSVRKGYLGKRPRTWISLTLTGRQRLASHLAALEEIAGTARRAGAEGTAPDT	1223	no	56.16	PF12840.7	Helix-turn-helix domain	4.2e-08
WP_071383933	Streptomyces monashensis	Streptomyces	13	WP_071383933_4	4	MSGKLHEQIHHPTRLAIVAFLSGCMEAEFKAVQEYCGASAATLSKLVTALESAGYVQVRKGYFGRRPRTWLSLTPDGRKALQEHLAALNALVDTSVEQGRRHETAATAPDA	1098	no	38.05	PF12840.7	Helix-turn-helix domain	8.8e-08
WP_079181075	Streptomyces sp. CB00316	Streptomyces	13	WP_079181075_3	3	MTEPRYDAVIHAPNRLRICAMLAAVDSMEFSRVRESLGVSDSVLSKHLKVLEGAGYVEVTKARGASYPRTWIALTRDGRRALAGHIAELRRIVGLADAPSGGEGETPPPD	3049	yes	42.28	PF12840.7	Helix-turn-helix domain	2.2e-14
WP_104258544	Rathayibacter tritici	Rathayibacter	13	WP_104258544_3	3	MQFDSVIHPEQRMRICAFLAPNDEVAFSIVRETLDMSESALSRQVKILVEAGYVSVTKESGVPRPRSWMALTDEGRRAIKGHLQALQQLAADAER	7276	yes	17.29	PF12840.7	Helix-turn-helix domain	1.9e-12
WP_106115031	Actinopolyspora mortivallis	Actinopolyspora	13	WP_106115031_2	2	MIEAVFDEVIHPSNRLQICAMLAEGGSWEFATVRDELGLSDSVLSKQVKVLRESGYVTVTKSPRNPRSRTWLALTAEGRRALEGHLTVLRRMAERSSPARTRENEQ	2225	yes	35.79	PF12840.7	Helix-turn-helix domain	1.3e-11
WP_133890759	Streptomyces sp. BK208	Streptomyces	13	WP_133890759_1	1	MTGEHSLDDAFRTANRLRMAAFLSGCDEAEFRAVQEYCGLSASNLSKNVSALDELGYLAVRKGHVGKVPRTWLALTDQGRKALLGHLAALQDIADSAARHA	3984	no	53.49	PF12840.7	Helix-turn-helix domain	5.4e-05
WP_141720451	Streptomyces sp. SID4946	Streptomyces	13	WP_141720451_4	4	MSGKLHEQIHHPTRLAIVAFLSGCIEAEFKAVQECCGASAATLSKLVTALESAGYVRVRKGYLGRRPRTWLSLTPDGRKALEEHLAALNALVNTSVEQGRRHDTAATPDT	863	no	20.65	PF12840.7	Helix-turn-helix domain	9.8e-09
WP_164312175	Streptomyces sp. SID12501	Streptomyces	13	WP_164312175_1	1	MTDGLDEAFRSTTRLRIASFLSGCEEAEFRAVQEYCELTAPTLSKHAAALEATGYVEIRKGHVGKTPRTWLTLTEQGRSALAGHLAELQCIAATAARHGNSHRA	2185	no	45.24	PF12840.7	Helix-turn-helix domain	3.3e-07
WP_017569537	Nocardiopsis halotolerans DSM 44410	Nocardiopsis	14	WP_017569537_3	3	MPVPPLELLLPAILVGVAFLGYCYFDLYRVAETRFLPKWAWGVLCALSIPFGGIAYLLLGRGHTSHA	956	yes	44.55	PF13567.6	Domain of unknown function (DUF4131)	3.1e-05
WP_027975917	Streptococcus devriesei DSM 19639	Streptococcus	14	WP_027975917_3	3	MKNAALIIIPIVIFYLAYLLFFFFDIRKNSVKYLPKWTWFLICAFVSAPLGGVIYYFVGRTEKIDHD	3	yes	22.8	PF15168.6	Triple QxxK/R motif-containing protein family	8.6e-05
WP_037567380	Staphylococcus agnetis	Staphylococcus	14	WP_037567380_2	2	MDIKILVPILLLLVLYLIVCFYDLVKVNDTKYLPKWIWGIIICISIPLGGIVYFLFARKISGEENE	20	yes	21.88	PF05767.12	Poxvirus virion envelope protein A14	2.7e-05
WP_068208510	Rathayibacter tanaceti	Rathayibacter	14	WP_068208510_1	1	MKIEILLPVLLLGLAFLIYCYVDLIRSAGTRHLPKWAWAIICAISIPLGGILYLIFGRTEQRAAE	959	yes	42.21	PF07851.13	TMPIT-like protein	8.3e-05
WP_068252194	Rathayibacter tritici	Rathayibacter	14	WP_068252194_1	1	MKIEILLPVLLLGLAFLIYCYVDLIRSAGTRYLPKWAWAIICAISIPLGGILYLIFGRTEQRAAQ	959	yes	39.45	PF07332.11	Putative Actinobacterial Holin-X, holin superfamily III	1.2e-05
WP_088612422	Bacillus amyloliquefaciens	Bacillus	14	WP_088612422_3	3	MEVKIIIPIIVLVLVYFYLCLSDLIKINNTKLFPKWVWGIICCISIPLGGIIYFIWGRGGLGNENR	506	yes	5.86	PF13396.6	Phospholipase_D-nuclease N-terminal	2.9e-08
WP_088679810	Bacillus subtilis subsp. subtilis	Bacillus	14	WP_088679810_2	2	MEVKIIIPIIVLVIIYFYFCFSDLIKINKTNLFPKWVWAIICCISIPLGGIIYFIWGRGGLGNENR	507	yes	7.05	PF04217.13	Protein of unknown function, DUF412	0.00011
WP_096547181	Staphylococcus delphini	Staphylococcus	14	WP_096547181_4	4	MTIKILIPIIILIIIYLIVCYHDLCKINMVKYLPKWVWSIIIIISIPLGGVIYFLLGRETRGENGD	28	yes	22.01	PF11912.8	Protein of unknown function (DUF3430)	0.0014
WP_104263878	Rathayibacter iranicus NCPPB 2253 = VKM Ac-1602	Rathayibacter	14	WP_104263878_1	1	MKIEILLPVLILCLAFLVYCFVDLIRSAGTRHLPKWAWAIICAISIPLGGILYLIFGRTEQRATD	959	yes	26	PF06570.11	Protein of unknown function (DUF1129)	8.9e-05
WP_107397356	Staphylococcus capitis	Staphylococcus	14	WP_107397356_2	2	MDLKILFPIIIIIIIYLIICFVDLFKVKKTKFLPKWVWGIIICISIPLGGILYYLLGRDILGEDNE	26	yes	22.12	PF00689.21	Cation transporting ATPase, C-terminus	0.00018
WP_129202808	Xylanimonas allomyrinae	Xylanimonas	14	WP_129202808_1	1	MDQPAILVPAVVLAAAFVVYCYVELARATEVRFLPKWGWAVAVAISVPLGGIVYLLAGRSETGSDA	962	yes	40.66	PF14667.6	Polysaccharide biosynthesis C-terminal domain	0.0001
WP_162681093	Staphylococcus sp. MI 10-1553	Staphylococcus	14	WP_162681093_3	3	MDMYIKILIPIIILIIIYLFICYRDLYKINMVKYLPKWGWSIIIIISIPLGGVIYFLFGRETRGDNG	14	yes	22.78	PF11912.8	Protein of unknown function (DUF3430)	0.00013
WP_018960901	Streptomyces sp. CNB091	Streptomyces	15	WP_018960901_3	3	MVRVAAHAAPAGTAVLRLLGMLPAHWECAQRIEEDRITVLVRGGGGQEVRERCAEALRGRTLEGWTLEGRQAL	7853	yes	27.54	none	none	none
WP_031017311	Streptomyces sp. NRRL WC-3795	Streptomyces	15	WP_031017311_4	4	MTQTEFQDLVLVCRRPGTAPAATAVVRLLGKLPGEWERSWRLDETGGRIRLRIRPPAGSPPAAVRAWADGALQDPALRAWCAEESGAT	7455	yes	25.4	none	none	none
WP_044377254	Streptomyces badius	Streptomyces	15	WP_044377254_2	2	MARVATDAAPAGIAVLRLIGMLPAEWECGQRIEDDRITVLVRGSGRDAGDVTGVRERCAEALRDRTLDGWVLEGAG	7754	yes	27.75	none	none	none
WP_051840194	Streptomyces lavendulae subsp. lavendulae	Streptomyces	15	WP_051840194_4	4	MRERHLYEVALVRAGPEAAAAETTVVRLVGLLPPHWTCAQRLDADGITLVVSAAAGGAGPDDGNAVRKWLARVLGEDSLRGWRAAGP	7439	yes	38.84	none	none	none
WP_058047489	Streptomyces sp. MBT76	Streptomyces	15	WP_058047489_3	3	MARTEFTEAVVARAAPTAAPPETAVIRLVGALPAGWDCNWRLREDGILLRVQPAAGAGPGAVAQWLAGVLDAGGLRGWRAVR	7600	yes	33.98	none	none	none
WP_096622718	Streptomyces sp. WZ.A104	Streptomyces	15	WP_096622718_2	2	MEITVVRASTDAAPAGTAVLRLIGMLPAHWDCGQHIEEDRITVLVRGGVRDARERCAEALRDRALEGWVLEGSG	7753	yes	40.21	none	none	none
WP_097866484	Streptomyces sp. rh34	Streptomyces	15	WP_097866484_4	4	MVVRAAVPAAPAGTAVLRLLGMLPAHWECAQRIEEDRITVLVRGGGRQDVRERCAEALKDRTLEGWTLEDGRRVP	7486	yes	35.07	PF10667.9	Protein of unknown function (DUF2486)	3.6e-06
WP_107115831	Streptomyces globisporus C-1027	Streptomyces	15	WP_107115831_4	4	MARVSADATPAGIAVLRLIGMLPAQWECGQRIDEDRITVLVRGSGRDAGDVTAVRERCAEALRDRTLHGWVLEGAG	7655	yes	29.9	none	none	none
WP_120754718	Streptomyces klenkii	Streptomyces	15	WP_120754718_5	5	MARTEFTEAVVERAAPTAAPPETAVVRLVSALPEGWDCTWRLEEDRIRLRVEPAGPAGLAAVHEWLAGVLVDGGVLRGWRRGR	7435	yes	26.96	none	none	none
WP_124271963	Streptomyces sp. ADI96-02	Streptomyces	15	WP_124271963_3	3	MVRAAVTAAPAGIAVLRLIGMLPAHWVCGQRIEEDRITLRVRGGDGPEVRGRCGAVLRDRALEGWALETPEPADRPPPGDRAAGTGAGAGDGAEDGAGGEPAEP	7673	yes	38.32	none	none	none
WP_126393842	Streptomyces sp. MK-45	Streptomyces	15	WP_126393842_3	3	MAVNGVDEAVEFQDLVLVRKAGGDAPAATAVIRVLGTLPEGWGHEWRLDEDGGRIHLRIRPPSGSGPGVVRGWLGGVLEDPALWAWGVEGAEPGG	7826	yes	10.21	none	none	none
WP_141310912	Streptomyces spinoverrucosus	Streptomyces	15	WP_141310912_3	3	MTDTEFQDLVLVRRPPGTAPAATALVRILGKLPEGWDRSWRLDEDGGRIQLRIRPPAGSPSTAVRTWLTEALGDPALRAWGAEETG	7624	yes	34.94	none	none	none
GFH39519	Streptomyces sp. CWH03	Streptomyces	16	GFH39519_2	2	MSTRPYPEHIHLAPSRLTTWEYFMSTALWIAVGLALLIAVIAGIKKGRG	6015	yes	6.96	none	none	none
PIR21572	Deltaproteobacteria bacterium CG11_big_fil_rev_8_21_14_0_20_47_16	Deltaproteobacteria	16	PIR21572_1	1	MAETLTQQQKDDRMWGMLCHLSALLAVFGVPLLNVLGPLVVWLLKKNTSTFVDEQGKNSLNFQLTATIAFLICVPLVFIGIGIFLMIAVGIADLVFVIIASIKVNQGENYKYPYSLNLIK	7264	no	30.92	PF09685.10	Domain of unknown function (DUF4870)	8.8e-42
WP_051727186	Streptomyces albidoflavus	Streptomyces	16	WP_051727186_2	2	MVHFHPPLSPSLPEPSPAPPLSGKPTPGPPGHLTNEESLMSTVLWIAIGIALLVAVTAGIRKNRG	5709	yes	12.87	none	none	none
WP_052479947	Streptomyces sp. AVP053U2	Streptomyces	16	WP_052479947_3	3	MSTTLWIVIAIALAVAVIAGIKKSRG	5838	yes	21.48	PF11446.8	Protein of unknown function (DUF2897)	5e-06
WP_055421432	Streptomyces pactum	Streptomyces	16	WP_055421432_2	2	MSTTLWIVIAIALVIAVIAGIKKSRG	5727	yes	20.17	PF11446.8	Protein of unknown function (DUF2897)	3.5e-05
WP_078077257	Streptomyces niveus	Streptomyces	16	WP_078077257_1	1	MSTAVWIAIAIALLVAVVAGIKKNRS	5970	yes	15.78	none	none	none
WP_097216730	Streptomyces sp. Ag82_G6-1	Streptomyces	16	WP_097216730_1	1	MSTALWIAIGIAVLVAVLAGIKKGRG	5888	yes	18.17	PF02468.15	Photosystem II reaction centre N protein (psbN)	2.6e-05
WP_104779873	Streptomyces tibetensis	Streptomyces	16	WP_104779873_2	2	MSTALWIAVGIAVVVAVVAGIKKSRG	5869	yes	4.57	PF02468.15	Photosystem II reaction centre N protein (psbN)	3.4e-05
WP_107501676	Streptomyces viridosporus	Streptomyces	16	WP_107501676_2	2	MSTALWIAVGIALVVAVVAGIKKSRG	5895	yes	14.69	PF07465.13	Photosystem I protein M (PsaM)	0.016
WP_121750537	Streptomyces sp. E2N166	Streptomyces	16	WP_121750537_1	1	MSTALWIAIGIALLVAVIAGIRKSRG	5870	yes	15.05	none	none	none
WP_135072443	Streptomyces sp. 4R-3d	Streptomyces	16	WP_135072443_1	1	MSTAVWIAIGIALLVAVFAGISKSRR	5801	yes	12.89	none	none	none
WP_141754588	Corynebacterium sp. HMSC078H07	Corynebacterium	16	WP_141754588_2	2	MSTFVIIAVAAILIIAIPAGMMSRRIHKRTEDHDPEARQAALDFQRDVDRGRAGF	2048	no	15.38	PF10812.8	Protein of unknown function (DUF2561)	1e-05
WP_015659226	Streptomyces davaonensis JCM 4913	Streptomyces	17	WP_015659226_5	5	MSLAPEEIADLVVRVITARESVPEAARRAEVPVRSVELWRQLFLDGGLQALEGAGPRRPTPRESLLEKEVESLKEALGEVILELDVWRELRHVRHRCT	3	yes	28.55	PF01527.20	Transposase	7.3e-07
WP_042407705	Streptacidiphilus carbonis	Streptacidiphilus	17	WP_042407705_1	1	MCRDHQCFHPMRRRASSSASWRAGARGLTQPPSQGGTARRERELLNEITRLRAALGEAHLALIVGRRKRKRP	6396	no	4.78	none	none	none
WP_051851944	Streptomyces sp. NRRL F-5650	Streptomyces	17	WP_051851944_1	1	MPRPPALPAEQKTRLVLAVLSKEHSVSEAARMARVSEQSIANWRRQFVEGGSVALAGRAPASPAGQREAALRKEVDRLKQALGEAYVELMACRRVGVPRHVPSGTSKQFARN	4	yes	58.44	PF13565.6	Homeodomain-like domain	0.018
WP_053560627	Streptomyces sp. CFMR 7	Streptomyces	17	WP_053560627_1	1	MARPPALPPQDKARLVLAVLAKETTVSQAARQAQVSEQAIANWRRQFIQAGRLGLEGQAAVRTSHKEDLLSDEVRKLKLALGEAYIELLTWRRVGEARRVPLPTSS	3	yes	42.93	PF01527.20	Transposase	1e-10
WP_060892878	Streptomyces europaeiscabiei	Streptomyces	17	WP_060892878_6	6	MDQETHEGPSVPLSSEEIADIVVGVIAGRESVAEAARRAQVSPRSVEAWRQVFLDGGLEALKGVGPRRPPTRESLLQREVDSLKEALGEVFLELDVWRDLDNVRRRHP	16	yes	19.83	PF01527.20	Transposase	3.3e-08
WP_083744359	Microbispora rosea	Microbispora	17	WP_083744359_1	1	MPRPPALPADDKLAIVLAVLSGKHTVAEAARRAEVSEQSILNWRKQFIEGGRSGLEGALANRASEREADLAAEVKRLKTVLGEVYLELNTWRKIGHVRRVPTRTSR	24	yes	74.08	PF13384.6	Homeodomain-like domain	6.5e-10
WP_109497443	Streptomyces sp. Act143	Streptomyces	17	WP_109497443_4	4	MPRPPALPAKDKTRLVLSVLAKECTVSEAARAAQVSEQSIANWRRQFIEGGSMALAGAAPPSGSQREAALTEEVHRLKQALGEAYVEVMAWRRTGDRPRVPSRTSKRSAPNWESPFRGTA	3	yes	31.69	PF01527.20	Transposase	1.1e-10
WP_128433866	Streptomyces cyaneus	Streptomyces	17	WP_128433866_1	1	MPRPPALPLQDKVRIVLSVLAKEKTVAEAARQAQVSEQSIANWRKQFIEGGSTGLAGPPAVRPTAHQEHLTDEVRRLKVALGEAYVELMAWRKIGDYRRVPSRTSR	3	yes	64.48	PF13384.6	Homeodomain-like domain	3.7e-09
WP_133890759	Streptomyces sp. BK208	Streptomyces	17	WP_133890759_5	5	MSPQPVIPPQEKVRLVLDLLCKRLTLSQAAQQAGVSPQAVANWRRQFVTAGQDSLQPQARQTKEADRERQLRNEIVLLKAALGDAHLALRQQRSEFTRRPGLPGSFRPGPARGSLL	6704	no	34.57	PF13565.6	Homeodomain-like domain	0.029
WP_136238412	Streptomyces sp. Akac8	Streptomyces	17	WP_136238412_1	1	MPRPPALPAREKTRLVLSVLAKECTVSEAARAARVSEQSIANWRRQFLEGGSAALAGRSAPSSTEQREAALVAEVHKLKQALGEAYVEVMAWRRTGDYRQVPSRSSKQYERN	2	yes	55.64	PF01527.20	Transposase	1.5e-10
WP_139627778	Nonomuraea sp. WYY166	Nonomuraea	17	WP_139627778_1	1	MPRPPAIPLQEKTRLVLAVLAKETTIAEAAKAAQVTEQSVINWRRQFVDGGCAGLAGGAADRRPEREEQLVNEIKRLKMALGEAYVEVMTWRKVGGARKVPSETSK	0	yes	45.35	PF13384.6	Homeodomain-like domain	1.4e-08
WP_164312175	Streptomyces sp. SID12501	Streptomyces	17	WP_164312175_5	5	MPRVPVLPAEEKARIVLNLLSGRTTLSQAALQAGVSAQSVSVWRRQFIEAGHTGFQPLAQRSEAARRERRLLGEIQGLKAALGEAHLALRATASHRAYSLR	6716	no	24.25	PF01527.20	Transposase	5.8e-09
AFR27446	Arthrobacter sp. Rue61a	Arthrobacter	18	AFR27446_3	3	MPDNKRNQSLATKKLVRNIALLLIGILAAYAVTTLLL	1117	yes	16.47	none	none	none
WP_061955677	Arthrobacter sp. EpRS66	Arthrobacter	18	WP_061955677_5	5	MPETNTAQNSPSKSPKLKKHLRNLALLLIGIAVAYAITTFLA	1138	yes	12.29	none	none	none
WP_062071413	Arthrobacter sp. EpRS71	Arthrobacter	18	WP_062071413_3	3	MPDNKRNQSLATKKLVRNIALLLIGVLAAYAVTTLLL	1117	yes	16.95	none	none	none
WP_091465037	Paenarthrobacter nitroguajacolicus	Paenarthrobacter	18	WP_091465037_3	3	MSDNKRNQSLATKKLIRNIALLLVGILAAYAVTTLLL	1117	yes	19.58	none	none	none
WP_096285992	Arthrobacter sp. MYb216	Arthrobacter	18	WP_096285992_4	4	MTDNDNHQDLAKKPSNIRKQLRNLALLALGVAIAYVVTNFLR	1231	yes	21.46	PF08423.11	Rad51	1.6e-05
WP_104291723	Rathayibacter sp. AY1A2	Rathayibacter	18	WP_104291723_5	5	MTTSRTASTRPSPLKKLLVNTALLVGGAGGAYLVVTYLF	1153	yes	25.85	none	none	none
WP_131089594	Arthrobacter sp. S41	Arthrobacter	18	WP_131089594_5	5	MTENNTAQNSPSKSSKLKKHLRNLGLLLLGIAVAYAITTFLA	1137	yes	12.75	none	none	none
WP_141366901	Glutamicibacter uratoxydans	Glutamicibacter	18	WP_141366901_2	2	MNNELNHQNQEAKTAATKKYLRSAIMLILGIAAAYVVTTFLL	1170	yes	15.77	PF11810.8	Domain of unknown function (DUF3332)	2.6e-06
WP_142936832	Arthrobacter sp. TS-15	Arthrobacter	18	WP_142936832_3	3	MSDNKRNQSLATKKLLRNVALLLIGVLAAYAVTALLL	1118	yes	20.62	none	none	none
WP_166841243	Paenarthrobacter sp. MSM-2-10-13	Paenarthrobacter	18	WP_166841243_3	3	MSDNKRNQSLATKKLLRNVALLLIGVLAAYAVTALLL	1117	yes	21.36	none	none	none
WP_168688294	Leifsonia sp. PS1209	Leifsonia	18	WP_168688294_1	1	MSDSDTRRPSSSKKLLKNILLLAGGILVAYLVTTYLF	1132	yes	25.9	none	none	none
OBQ18754	Anabaena sp. WA113	Anabaena	19	OBQ18754_4	4	MRITISELELRISEAILDELTPWEMKTLKGGYVMRKDRRNPPTTNITNTTDLSTVFKELDSSMERWKISLKDTTDSLRSKFDF	2126	yes	19.77	none	none	none
OBQ36138	Anabaena sp. CRKS33	Anabaena	19	OBQ36138_2	2	MKIIISELGKRIPEPILDELTPWEMKNINGGYMTRRQMARYNMTNSNNTTTNTNDFSTMIKEINSSIAEWKITLQDTTDSLGVNFTF	2305	yes	23.72	none	none	none
WP_015078657	Anabaena sp. 90	Anabaena	19	WP_015078657_9	9	MRITISELEIRLAEPILDQLTPWEMKTLKGGYVMRKDRINPPTTNITNTTDLSTVFKELDSSMEKWKISLKDTTDSLRSKFDF	2163	yes	28.65	none	none	none
WP_096664869	Dolichospermum compactum NIES-806	Dolichospermum	19	WP_096664869_7	7	MKITISELELRISEPILDELTPWEMKTLKGGYTMRKDRRNPPITTNTTDLSTLLKELDSSMEQWKISLKDTTDSLINKFDF	2286	yes	20.94	none	none	none
WP_137906310	Dolichospermum planctonicum	Dolichospermum	19	WP_137906310_4	4	MKIIISELGKKIPEPILDELTLWEMKNINGGYMTRRDMARYNMTNSNNTTNTNDFSTMLKEINSSIAQWKITLEDTTDTLGINFNF	2405	yes	21.21	PF15894.5	Inhibitor of glucose uptake transporter SgrT	0.00028
WP_148763415	Dolichospermum sp. UHCC 0315A	Dolichospermum	19	WP_148763415_6	6	MRITISELELRLAEPILDQLTPWEMKTLKGGYVMRKDRRNPPTTNITNTTDLSTVFKELDSSMERWKISLKDTTDSLRSKFDF	2163	yes	27.58	none	none	none
WP_168357543	Dolichospermum planctonicum UHCC 0167	Dolichospermum	19	WP_168357543_3	3	MKIIVSELGTTISEAILDELTPWEMKNINGGYMTRRDMERYNMTNSNNTTNTTDFSTMLKEINSSIAKWKITLQDTTDSLGINFNF	2436	yes	27.19	none	none	none
WP_168465654	Aphanizomenon sp. UHCC 0183	Aphanizomenon	19	WP_168465654_6	6	MKITISELELRISEPILDELTPWEMKTLKGGYVMRKDRINPPITTNTTDISTLLKELDSSMEQWKISLKDTTDSLINRFDF	2172	yes	22.18	none	none	none
WP_168645325	Dolichospermum sp. UHCC 0259	Dolichospermum	19	WP_168645325_6	6	MKITISELKLRISEPILDELTPWEMKTLKGGYTMRKDRINPPITTNTTDLSTLLKELDSSMEQWKISLKDTTDSLINRLDF	2356	yes	18.69	PF03354.15	Phage Terminase	5.5e-06
CNF13542	Mycobacterium tuberculosis	Mycobacterium	20	CNF13542_4	4	MAAEDNQGRRADLAALMTQLEESMADVRGIDDFVGAGAAFIKGEEQDIEATVDQMMSFFNGEIGGHSTERQRLIQIAQCMRREAGGVAIFMLTFTTCSAALSCSYACC	50	yes	44.15	none	none	none
PZN45587	Actinobacteria bacterium	Actinobacteria	20	PZN45587_2	2	MADEAAERSLDMQTLMAELRRSMADVKGIDEFLGAGAAFINGEEQDIDLTVERMMSFFNGEIGGYSEERQRLVVLAQTMRRRVGGVPVLLLTFTTCTEVLSCSYACC	38	yes	31.17	PF04566.13	RNA polymerase Rpb2, domain 4	1.6e-05
WP_030452416	Herbidospora cretacea	Herbidospora	20	WP_030452416_1	1	MDDAEQPKPPYDVTALLVELQRSWATVPGIDDFVGSGAAFVKGEEPDLEKTVDRMMSFFNGEIGGYSTERQRLVLLAQNMRKRAGGVPIVLLTFTTCTEVLSCSYACC	14	yes	76.47	none	none	none
WP_062348671	Herbidospora yilanensis	Herbidospora	20	WP_062348671_1	1	MDDAEQAKPPYDVTALLVELQRSWATVPGIDDFVGSGAAFVKGEEPDLEKTVDRMMSFFNGEIGGYSTERQRLVLLAQNMRKRAGGVPIVLLTFTTCTEVLSCSYACC	14	yes	74.92	none	none	none
WP_062437448	Herbidospora daliensis	Herbidospora	20	WP_062437448_1	1	MDAEPPPRPQYDLNALLVELERSWSTVPGIDDFVGSGAAFVKGEEADLEKTVDRMMSFFNGEIGGYSTERQRLVLLAQNMRKRAGGVPIVLLTFTTCTEVLSCSYACC	10	yes	74.19	none	none	none
WP_131969051	Actinomadura sp. KC06	Actinomadura	20	WP_131969051_1	1	MENEKNTPAAGEKEERSDLAALMTQLAQSMAAVRGFDDFVGAGTAFIKGEEDDIDTTVEQMMSFFNGEIGGYSTERQRLIQIAQSMRKEAGGVAIFMLTFTTCSAALSCSYACC	10	yes	48.06	none	none	none
WP_137248807	Herbidospora galbida	Herbidospora	20	WP_137248807_1	1	MDAEPPRPQYDVTALLEELQRSWATVPGIDDFVGSGAAFVKGEEADLEKTVDRMMSFFNGEVGGYSTERQRLVLLAQNMRKRAGGVPIVLLTFTTCTEVLSCSYACC	10	yes	72.07	none	none	none
WP_145982885	Pseudonocardia sp. EC080625-04	Pseudonocardia	20	WP_145982885_1	1	MTESAKPKFDTFTLARLREETATIPGIERFVSSARGFVYGDVSLDDATSQMMEFFDGDLIGGSDERQRLVELAKQLNPRYGTVSVMILTFMTCSPVLSCAGSCSE	3	yes	58.6	none	none	none
WP_161483240	Herbidospora sp. NEAU-GS84	Herbidospora	20	WP_161483240_1	1	MDDAEQPKPPYDVTALLVELQRSWATVPGIDDFVGSGAAFVKGEEPDLEKTVDRMMSFFNGEIGGYSTERQRLVLLAQNMRKRAGGVPIVLLTFTTCTEVLSCSYACC	14	yes	70.61	none	none	none
WP_008380405	Gordonia malaquae NBRC 108250	Gordonia	21	WP_008380405_3	3	MSRAELARRIDVNVQSVGSIERGDYYPSLDLAMRICEVFDLPVEAVFSRTEFAPLSAQVYRG	4560	no	22.24	PF01381.22	Helix-turn-helix	7.2e-13
WP_068028504	Nocardia mexicana	Nocardia	21	WP_068028504_3	3	MYNLLREIRTAQGVSRAELAEAVEVNVQTIGALERGQYSPSLYLALMICEALDTQLDQVFGLAD	1744	yes	18.76	PF08784.11	Replication protein A C terminal	8.1e-05
WP_084520237	Nocardia mexicana	Nocardia	21	WP_084520237_3	3	MYNLLREIRTAQGVSRAELAEAVEVNVQTIGALERGQYSPSLYLALMICEALDTQLDQVFGLAD	4637	yes	18.76	PF08784.11	Replication protein A C terminal	8.1e-05
WP_092602219	Actinopolyspora xinjiangensis	Actinopolyspora	21	WP_092602219_1	1	MSRAALAEHVGVNRQTIGALERGDHYPSLLLAMSICDVFGLPIEAVFSREPFQSITAAYGRPDTGATRGDQV	6700	yes	26.8	PF01381.22	Helix-turn-helix	7.2e-12
WP_115965582	Rhodococcus sp. OK269	Rhodococcus	21	WP_115965582_1	1	MPVAGDARRPMYNNLRRFRAQAKVSRAELAATIDVNVQTIGALERGSYSPSLYLALLIADALDVPLIDLFGLADTVENHRTGTH	1683	yes	41.42	PF17105.5	C-terminal domain of bromodomain protein 4	6e-06
WP_122818055	Nocardioides sp. 603	Nocardioides	21	WP_122818055_3	3	MARRARQDEVRRIHNRVAVLRAETKLSRAQLAERVGVNPQTIGALERGEHYPSLQLAMSICEVFGVPIEAVFSREPFPSVTATYRRPDPQEDPS	6530	yes	39.72	PF13384.6	Homeodomain-like domain	8.1e-06
WP_153321593	Nocardioides sp. dk4132	Nocardioides	21	WP_153321593_2	2	MVRRTRSGDDAPRIYNRVRVVRAELGISRAELAASVGVNPQTIGALERGDHYPSLNLAMSICEVFDVPIEAVFSRQPFPSVAAGYKRERPADPDREEQG	6339	yes	33.15	PF13384.6	Homeodomain-like domain	3.6e-05
WP_155862233	Corynebacterium durum F0235	Corynebacterium	21	WP_155862233_6	6	MDATLIAKPTNLVRKLRRWRELSQAELAERAHVSRQTIVNVEKGSYSPSVYLALAICRELGATVEEVFGDEQSMEVVKGETS	3555	yes	13.52	PF17196.4	Protein of unknown function (DUF5133)	0.00012
KQB97104	Loktanella sp. 1ANDIMAR09	Loktanella	22	KQB97104_1	1	MCVKVGFTAGCTFGDVAEATKAAAAAAPVGASADCVSVAFTAGCTFSDIAEAQAAAKPHLDAFGSTELGCGNVLFTAVCSV	1108	yes	25.53	none	none	none
WP_055189764	Aliiroseovarius crassostreae	Aliiroseovarius	22	WP_055189764_1	1	MCVSVAFTAGCTFSDVAEATKAASNAQLSASENCVSVLFTAGCSFKSIEEAQAAAQPHLDAMAEAAGNCGKVMFTAVCSV	1154	yes	17.51	none	none	none
WP_106358260	Yoonia maritima	Yoonia	22	WP_106358260_1	1	MCVSVAFTAGCTFGDVEEATKAAAANPVQVTEGCVSVLFTAGCSFGDVAEAQAAAQKHMDALGASKLGCVSTAWTAVCTV	1156	yes	14.75	PF08098.11	Anemonia sulcata toxin III family	0.0022
WP_106743417	Yoonia maritima	Yoonia	22	WP_106743417_1	1	MCVSVAFTAGCTFGDVEEATKAAAANPVQVTEGCVSVLFTAGCSFGDVAEAQAAAQKHMDALGASKLGCVSTAWTAVCTV	1156	yes	19.69	PF08098.11	Anemonia sulcata toxin III family	0.0022
WP_107498105	Thalassobius sp. I31.1	Thalassobius	22	WP_107498105_3	3	MCVSVAFTAGCTFGSIEEASKAAAANPVTVADNCVSVLFTAGCSFGTVAEAQAAAQPHLDAIAASADNCGNVLFTAVCTV	1152	yes	19.48	PF08098.11	Anemonia sulcata toxin III family	0.0026
WP_110278359	Loktanella sp. PT4BL	Loktanella	22	WP_110278359_1	1	MCIKVGFTAGCTFGDVAEATKAATAAAPVAASDDCVSIAFTAGCTFGDIAEAQAAAKPHLDAFGSTQLGCGSVLFTAVCSV	1127	yes	24.91	PF08098.11	Anemonia sulcata toxin III family	0.0023
WP_162197196	Loktanella sp. S4079	Loktanella	22	WP_162197196_2	2	MCVSVAFTAGCTFSSVEEATKAAAEKPVEVSEGCVSVLFTAGCSFGDVKEAQAAAQQHMDALGASKLGCVSTAWTAVCTV	1134	yes	13.02	none	none	none
WP_051708270	Micromonospora parva	Micromonospora	23	WP_051708270_3	3	MVFETTWPLIQLTPALTMAQPGVVAGASETAERSMSSAVL	406	no	2.86	none	none	none
WP_053706403	Streptomyces sp. WM6373	Streptomyces	23	WP_053706403_4	4	MRRAREGPRTPHRVVPEGDQQPSSTVFETTWPLIQLMLADTAAQPQVVAGASEAADRLISSTELYAS	443	no	13.24	none	none	none
WP_054237388	Actinobacteria bacterium OK006	Actinobacteria	23	WP_054237388_8	8	MVPAPSGSGPTTTRRGCRIPGGSPHVPYESGQQPAPCVMETLVRIPLAAEIENAPHSGDDAVMIDGVVAGASPAAEAPKSAASV	797	no	13.1	none	none	none
WP_071383933	Streptomyces monashensis	Streptomyces	23	WP_071383933_7	7	MVAPQAADDMSIDTRIDGVVAGASPSAVTPNSSAEV	799	no	8.35	none	none	none
WP_153461219	Streptomyces kaniharaensis	Streptomyces	23	WP_153461219_5	5	MEPRLVVPEGPACCGPLLRERLAQQPQLAVAPTAPLTTLTVKAPHSGEEAVTIVGVVAGASAEALAPTSWASV	3624	yes	28.79	none	none	none
WP_153461219	Streptomyces kaniharaensis	Streptomyces	23	WP_153461219_7	7	MGPRLVVPEGPACCGPLLRERLAQQPQLTVPAIEPPMALPTAAPQAAVETAMTLSAGVVAGASAVAPAPTSSASV	3918	yes	20.04	none	none	none
WP_157846946	Streptomyces achromogenes subsp. achromogenes	Streptomyces	23	WP_157846946_3	3	MPVIAGPAHARLTWDGSDQQPSSYVLETAWPVSQLAPAVAAQTSVVAGASDAADRLISSTVLYVS	362	no	5.32	PF04311.13	Protein of unknown function (DUF459)	6.6e-06
WP_052479947	Streptomyces sp. AVP053U2	Streptomyces	24	WP_052479947_4	4	MTQVARRMEMSDRTLRRKVRSICDRVDVETPIEAVVWAVRRRII	1332	yes	13.15	PF02954.19	Bacterial regulatory protein, Fis family	1.4e-05
WP_055421432	Streptomyces pactum	Streptomyces	24	WP_055421432_3	3	MEMSDRTLRRKVRSICDRVDVETPIEAVVWAVRRRII	1341	yes	4.62	none	none	none
WP_078077257	Streptomyces niveus	Streptomyces	24	WP_078077257_2	2	MAQVARRMGMSDRTLRRKLRTICERVDVETPIEAVVWAVRRRIV	1716	yes	2.29	PF02954.19	Bacterial regulatory protein, Fis family	3.5e-07
WP_097216730	Streptomyces sp. Ag82_G6-1	Streptomyces	24	WP_097216730_2	2	MTLNSSLREPHLIFGNDHLRILQLISQGCTMTQVARRMEMSDRTLRRKLRSICERVDVETPIEAVVWAVRRRVI	1354	yes	4.89	PF05043.13	Mga helix-turn-helix domain	6.2e-05
WP_104779873	Streptomyces tibetensis	Streptomyces	24	WP_104779873_1	1	MTLNSSLREPHLRLGNDHLRILQLVSQGCTMTQVARRMEMSDRTLRRKLRSICDCVDVETPIEAVVWAVRRRII	1353	yes	6.48	PF02796.15	Helix-turn-helix domain of resolvase	9.2e-07
WP_121750537	Streptomyces sp. E2N166	Streptomyces	24	WP_121750537_3	3	MSQVARRMEMSDRTLRRKIRSICDRVDVETPIEAVVWAVRRRII	1300	yes	-3.32	PF02954.19	Bacterial regulatory protein, Fis family	5e-06
WP_135072443	Streptomyces sp. 4R-3d	Streptomyces	24	WP_135072443_2	2	MAQVARRMGMSDRTLRRKLRTICERVDVETPIEAVVWAVRRRIV	1510	yes	8.91	PF02954.19	Bacterial regulatory protein, Fis family	3.5e-07
OBQ18754	Anabaena sp. WA113	Anabaena	25	OBQ18754_1	1	MYDNDKRKLLSALCHGAIFFSTTMVSIGLPVAILFVSDDPVVKDNAKESINFHFNVWLYGAILGALFFLTGWLIIPLFFLLPLAGLGYIIHWGLTIWALIGVFSNPNQPCRYPFIFRVF	3844	no	42.32	PF09972.9	Predicted membrane protein (DUF2207)	0.00049
WP_015078657	Anabaena sp. 90	Anabaena	25	WP_015078657_3	3	MYDSDKRKLLSALCHGAIFFSTTIVSVGLPIAILFVSDDPVVKENAKESINFHFNVWLYGAILGALFFLFGWLILPLFILFPLAGLGYILHWGLTIWALIGVFSDPNQPCRYPFIFRVF	3915	no	38.67	PF09972.9	Predicted membrane protein (DUF2207)	0.00086
WP_027402982	Aphanizomenon flos-aquae NIES-81	Aphanizomenon	25	WP_027402982_3	3	MYDSDKRKLLSALCHGAIFFSTTIVSIGLPIAILFVSDDPVVKDNAKESINFHFNVWLYGTILGALFFLIGWLIVPLFILFPLAGLGYILHWGLTIWALTGVFSNPNQPCRYPFIFRVL	4658	no	36.62	PF09972.9	Predicted membrane protein (DUF2207)	0.00048
WP_096664869	Dolichospermum compactum NIES-806	Dolichospermum	25	WP_096664869_4	4	MYDSDKRKLLSALCHGAIFFSTTIVSIGLPIAILFVSDDPVVKDNAKESINFHFNVWLYGSILGALFFLIGWLIVPLFILFPLAGLGYILHWGLTIWALIGVFSNPDQPCRYPFIFRVL	4032	no	34.41	PF09972.9	Predicted membrane protein (DUF2207)	0.00086
WP_148763415	Dolichospermum sp. UHCC 0315A	Dolichospermum	25	WP_148763415_1	1	MYDSDKRKLLSALCHGAIFFSTTIVSVGLPIAILFVSDDPVVKENAKESINFHFNVWLYGAILGALFFLFGWLILPLFILFPLAGLGYILHWGLTIWALIGVFSDPNQPCRYPFIFRVF	3914	no	39.55	PF09972.9	Predicted membrane protein (DUF2207)	0.00086
WP_168465654	Aphanizomenon sp. UHCC 0183	Aphanizomenon	25	WP_168465654_2	2	MYDSDKRKLLSALCHGAIFFSTTIVSIGLPIAILFVSDDPVVKDNAKESINFHFNVWLYGAILGALFFLFGWLILPLFILFPLAGLGYILHWGLTIWALIGVFSDPNQPCRYPFIFRVL	4099	no	37.69	PF09972.9	Predicted membrane protein (DUF2207)	0.00091
WP_168645325	Dolichospermum sp. UHCC 0259	Dolichospermum	25	WP_168645325_3	3	MYDSDKRKLLSALCHGAIFFSTTIVSIGLPIAILFVSDDPVVKDNAKESINFHFNVWLYGAILGALFFLIGWLVLPLIILLPLAGLGYILHWGLTIWALIGVFSNPNQPCRYPFIFRVL	4101	no	33.53	PF09972.9	Predicted membrane protein (DUF2207)	0.00049
WP_015078657	Anabaena sp. 90	Anabaena	26	WP_015078657_11	11	MNNGKINQPNRKNNAPRIAPYNQTLKWKLIDSLAFSLTTGSSDTNSMAMGKPTETIVVLKKIAP	3956	yes	7.81	none	none	none
WP_027402982	Aphanizomenon flos-aquae NIES-81	Aphanizomenon	26	WP_027402982_9	9	MNNGTINQPIRKNNAPRIVPYNQTLKWKLIDSLALSLTTGSSDTNSMAIGNPMETIVVLKKIAP	4699	yes	7.58	none	none	none
WP_096664869	Dolichospermum compactum NIES-806	Dolichospermum	26	WP_096664869_8	8	MNNGTINQPIRKNNAPRIDPYNQTLKWKLIDSLALSLTTGSSDTKSMAIGNPMETMVVLKKIAP	4073	yes	9.25	none	none	none
WP_148763415	Dolichospermum sp. UHCC 0315A	Dolichospermum	26	WP_148763415_7	7	MNNGKINQPNRKNNAPRIAPYNQTLKWKLIDSLAFSLTTGSSDTNSMAMGKPTETIVVLKKIAP	3955	yes	7.78	none	none	none
WP_168465654	Aphanizomenon sp. UHCC 0183	Aphanizomenon	26	WP_168465654_9	9	MNNGKINQPKRKNNAPRIAPYNQTLKWKLIDSLALSLTTGSSDTNSMAIGKPMETMVVLKKIAP	4140	yes	8.5	none	none	none
WP_168645325	Dolichospermum sp. UHCC 0259	Dolichospermum	26	WP_168645325_7	7	MIRGKTNQPIRKNNAPRIAPYNQTLKWKFIDSLALSLTTGSSDTNSMAMGNPMETMVVLKKIAP	4142	yes	8.53	none	none	none
WP_051851944	Streptomyces sp. NRRL F-5650	Streptomyces	27	WP_051851944_2	2	MIEGIAGAVALGVTGALGVATDRTANKRKKAFKERYGTFEGFRSQVDEEKIQRVRREKGNVSAIKVVRENYPYVSLAFAKRYVEELPS	5589	yes	53.31	PF08077.11	Chloramphenicol resistance gene leader peptide	9.5e-05
WP_053560627	Streptomyces sp. CFMR 7	Streptomyces	27	WP_053560627_2	2	MLVAVAAGVAVGASAVVAVVIGRRNRNTRDDFVKQFRTQEEFRKAVAADGDRIRSIRETQSEMAAIKAVRDEFPGAPLQQVIQVVRAL	5793	yes	41.96	PF10907.8	Protein of unknown function (DUF2749)	0.00024
WP_109497443	Streptomyces sp. Act143	Streptomyces	27	WP_109497443_1	1	MIENISGAIAVGISTILGVAGENTSKKRAQAFTKRYGSYEGFRQQVDEDRVQGVLRTRGKVAAIKEVRDNYPYVSLPMAKRYVEQLPA	5713	yes	70.61	PF00542.19	Ribosomal protein L7/L12 C-terminal domain	8e-06
WP_128433866	Streptomyces cyaneus	Streptomyces	27	WP_128433866_3	3	MFGWQKRKQEFKERYPSYDDFRRAVDESRIRRVKQQDGDVKAIKVLRDDFPGAPLELATRYVREL	5621	yes	44.1	PF15867.5	Dynein attachment factor N-terminus	4.7e-06
WP_136238412	Streptomyces sp. Akac8	Streptomyces	27	WP_136238412_2	2	MVEGVAGAVAVGITTVLGVASDRTSKKRAQAFTRQYGSYEGFRQQVDEAHVQEVRRTRGDVAAIKAVRDAHPTVSLRLAKRYVEQLPAA	5625	yes	54.99	PF00934.20	PE family	6.2e-07
WP_139627778	Nonomuraea sp. WYY166	Nonomuraea	27	WP_139627778_3	3	MAEIFIAAATMVLGGGAAAAVNKRQKKKREAFTAQFGSFEEFRRAADPDRIRAIRDDRGELVAVKVVRQEYPGIPLEYATRFVKQL	5501	yes	35.19	PF00746.21	LPXTG cell wall anchor motif	6.5e-06
WP_006619051	Arthrospira platensis YZ	Arthrospira	28	WP_006619051_2	2	MIDWQKQIERNPNICHGKPCIKGTRIMVSVILDNLAEGLTLAEIVEDYPPLTLENVRSAIAYAAALAREEELSPTR	2270	yes	33.48	PF04255.14	Protein of unknown function (DUF433)	1.4e-29
WP_006622760	Arthrospira platensis C1	Arthrospira	28	WP_006622760_5	5	MLNWQEQIEKNPNICHGKPCIKGTRIMVSVILDNLAEGLTLAEIVEEYPPLTLENVRSAIAYAAALAREEELSPT	188	yes	32.38	PF04255.14	Protein of unknown function (DUF433)	1.9e-29
WP_012409237	Nostoc punctiforme PCC 73102	Nostoc	28	WP_012409237_1	1	MNEQTLLERITFNPQIFGGKPIIRGRRLAVEHILGMLAVGDTIETLLEAYPWLEREDVQACLIYARRLVGHERIEPLLIESPR	4450	no	39.8	PF04255.14	Protein of unknown function (DUF433)	1.7e-27
WP_012409237	Nostoc punctiforme PCC 73102	Nostoc	28	WP_012409237_4	4	MSDNDLLSRISIDPNICFGKPCIRGHRIWVSLILDYLAGGTTIEEVLEAYPSIEREDVLACIAYGAEMVRDVFVELPLTKKKEASA	2030	no	24.34	PF04255.14	Protein of unknown function (DUF433)	8e-31
WP_094345265	Nostoc sp. Peltigera membranacea cyanobiont 232	Nostoc	28	WP_094345265_3	3	MSDNDLLSRISIDPNICFGKPCIRGHRIWVSLILDYLAGGTTIEEVLEVYPSIEREDVLACIAYGAEMARDVFVELPLTKKKEASA	2035	no	24.42	PF04255.14	Protein of unknown function (DUF433)	3.3e-30
WP_109006830	Nostoc commune NIES-4072	Nostoc	28	WP_109006830_2	2	MTKNDLLSRISIDPNICFGKPCIKGHRIWVSLILDLLASGEKIETILEEYPGLEREDILACITYAAEMTRDSYVEIPLGLQKESKK	3772	no	31.07	PF04255.14	Protein of unknown function (DUF433)	2.7e-31
BAZ33272	Cylindrospermum sp. NIES-4074	Cylindrospermum	29	BAZ33272_3	3	MTNIQEKTSTDIQEKIQEEVEQARTVCDITGSNSAECAAAWDAVEELQAEASHQRQNKPKNSLEQYCDDNPEAIECRLYED	6449	no	26.3	PF00013.29	KH domain	1.4e-05
WP_073643028	Nostoc calcicola FACHB-389	Nostoc	29	WP_073643028_2	2	MTNIQETAKGDIQEKIQEEVEQARTVCDINGSNSPECAAAWDAVEELQAEASHQRQSKPKNSFEQYCDDNPDAIECRVYDD	7091	no	32.6	PF07165.11	Protein of unknown function (DUF1397)	5.7e-07
WP_096537472	Nostoc linckia NIES-25	Nostoc	29	WP_096537472_1	1	MTNIQETAKNGIQEQIQQEVEQARTVCDINGSNSPECAAAWDAVEELQAEASHQRQSKPKNSLEQYCDDNPEAIECRVYDD	7243	no	31.33	PF07165.11	Protein of unknown function (DUF1397)	2.8e-06
WP_096664869	Dolichospermum compactum NIES-806	Dolichospermum	29	WP_096664869_3	3	MVSINEVINGKKTIEAAILEAITEARTTCTENGNNSPNCAVAWDIVEELQAEKAHQKQAKHRKTALEDYCEMYPDALECLIYDL	7706	yes	36.72	PF04011.12	LemA family	2.2e-06
WP_099068319	Nostoc linckia z15	Nostoc	29	WP_099068319_1	1	MTNIQETATNGIQEQIQKEVEQARSVCDINGSNSPECAAAWDAVEELQAEASHQRQNKPKNSLEQYCDDNPEAIECRVYDD	7987	no	34.3	PF07165.11	Protein of unknown function (DUF1397)	2.3e-06
WP_138498533	Nostoc sp. PA-18-2419	Nostoc	29	WP_138498533_5	5	MTNIQGTAKGDIQQKIQQEVEEARTVCDTSGDTSPECAAAWDAVEELRAEASHQRQIKPKNSFEQYCDDNPDAIECRVYDD	6384	no	32.5	PF02672.15	CP12 domain	1.1e-36
WP_015078657	Anabaena sp. 90	Anabaena	30	WP_015078657_5	5	MPKKIRELKYTIVIQWSNEDKCYVVSLPDFTDIMQPCTHGDTYEEALKNAQEVLEMLISSYLEDGQPIPEPQIIGIN	7451	yes	33.85	PF08363.10	Glucan-binding protein C	1.1e-05
WP_027402982	Aphanizomenon flos-aquae NIES-81	Aphanizomenon	30	WP_027402982_1	1	MKYTIIIQWSKEDECYVVSLPDFTDVMQPCTHGDTYEEALKNAQEVLEMLISSYLEDGQPIPEPQIIGIN	5830	yes	43.2	PF15919.5	HicB_like antitoxin of bacterial toxin-antitoxin system	2.2e-14
WP_096664869	Dolichospermum compactum NIES-806	Dolichospermum	30	WP_096664869_6	6	MPKKIRELKYTIVIQWSNEDKCYVVSLPDFTDIMQPCTHGDTYEEALKNAQEVLEMLISSYLED	5642	yes	26.4	PF15919.5	HicB_like antitoxin of bacterial toxin-antitoxin system	7.6e-11
WP_148763415	Dolichospermum sp. UHCC 0315A	Dolichospermum	30	WP_148763415_3	3	MNNHYTIIIQWSEEDKCFVVSLPEWGEFCHTHGDTYEEALKNAQEVLEMLISSYLEDGQPIPEPQIIGKSLTAA	6341	yes	39.24	PF15919.5	HicB_like antitoxin of bacterial toxin-antitoxin system	1.6e-14
WP_168465654	Aphanizomenon sp. UHCC 0183	Aphanizomenon	30	WP_168465654_5	5	MKYTIIIQWSNEDKCYVVSLPDFTDIMQPCTHGDTYEEALKNAQEVL	5963	yes	24.65	PF15919.5	HicB_like antitoxin of bacterial toxin-antitoxin system	3e-09
WP_168645325	Dolichospermum sp. UHCC 0259	Dolichospermum	30	WP_168645325_2	2	MNNHYTIIIQWSEEDNCFVVSLPEWGEFCHTHGDTYEEALKNAQEVLEMLISSYLEDGQPIPEPQILGKSLTAA	7608	yes	38.77	PF15919.5	HicB_like antitoxin of bacterial toxin-antitoxin system	2.9e-14
BAZ29305	Cylindrospermum sp. NIES-4074	Cylindrospermum	31	BAZ29305_3	3	MIINPAGINLRVLASLKEKTTTKTPVTKAAKIKAQVCPWSVK	2280	no	2.25	none	none	none
TAE58797	Nostocales cyanobacterium	Nostocales	31	TAE58797_2	2	MTKANTPKITINPAGINLRVLASLIAKKVTINPVTTPAKAKPQVIPCNWQ	1784	no	4.8	PF11760.8	Cobalamin synthesis G N-terminal	2.4e-06
WP_089092704	Nodularia sp. NIES-3585	Nodularia	31	WP_089092704_3	3	MNVNANTPKITIIPAGINLRVLANLNAKKITKLTVTKTAKIKAQA	2023	no	2.51	none	none	none
WP_095720237	Calothrix elsteri CCALA 953	Calothrix	31	WP_095720237_2	2	MIISVVIPKPVIKPAGMNLRVFCNLIAKTMTNMPVITAAKARANPCL	2352	no	4.62	none	none	none
WP_096561092	Scytonema sp. NIES-4073	Scytonema	31	WP_096561092_3	3	MNPAGINLRVLTSRNPKTTIKTAVITTANVKPQVCPWRWTKAAIISSKPLMIPLIRETLLFALR	2629	no	-1.21	none	none	none
WP_103138934	Nostoc sp. CENA543	Nostoc	31	WP_103138934_3	3	MNLRVLASLKAKKTTKTAVTQVARIKAQACPCNCK	2445	no	5.03	none	none	none
AWS47415	Streptosporangium sp. caverna	Streptosporangium	32	AWS47415_7	7	MAPPAALAAALAQYHELATLTATEAAHTGVVAGASTLAAMLSSLALAYAL	111	no	11.88	none	none	none
WP_078760724	Marinactinospora thermotolerans DSM 45154	Marinactinospora	32	WP_078760724_3	3	MQGRVVIETVVTVIDAGASAAALMFSSATSV	123	no	4.2	none	none	none
WP_137451632	Nakamurella flava	Nakamurella	32	WP_137451632_5	5	MVAIPAPLPAAHFHELIAVAMQTGEVLAAGAGLVASTFSSLSSV	203	no	9.95	none	none	none
WP_141936425	Microbacterium sp. SLBN-154	Microbacterium	32	WP_141936425_5	5	MVTPVLVTAPALAPMEKATHSGEEAVRNTLTVDGVAAGAASPVRADSSDACA	263	no	9.44	none	none	none
WP_170198719	Thermopolyspora flexuosa	Thermopolyspora	32	WP_170198719_3	3	MAPAEAPISALTHHFELAAETAQTGEVAGASTLASMFSSAAVA	183	no	-4.45	none	none	none
TDT36016	Streptomyces sp. BK447	Streptomyces	33	TDT36016_4	4	MSKFTIRDVSESGWESLVVTALMGIEESPGWTDCWPTGGTSGVCCTTSPAAPEPRN	5450	yes	16.61	none	none	none
WP_047015652	Streptomyces sp. CNQ-509	Streptomyces	33	WP_047015652_2	2	MPPETATAELTTESAPEASWEELVATALSGVEESPGWTDCWPTNPSCCSTCSLSAPDGTE	5143	yes	25.44	none	none	none
WP_051368293	Streptomyces sp. CNQ329	Streptomyces	33	WP_051368293_2	2	MPPETATAELTTESAPEASWEELVATALSGVEESPGWTDCWPTNPSCCSTCSLSAPDGTE	5138	yes	24.27	none	none	none
WP_051642643	Streptomyces sp. CNQ-525	Streptomyces	33	WP_051642643_2	2	MPPETATAELTTESAPDASWEELVATALSGVEESPGWTDCWPTNPSCCSTCSLSAPDGTE	5142	yes	24.64	none	none	none
WP_159425396	Streptomyces lincolnensis	Streptomyces	33	WP_159425396_2	2	MGKFTIRDVSESGWESLVVTALMGIEESPGWTDCWPTGGTSGACCTTSPAAPEPGV	5221	yes	8.7	none	none	none
RCJ14929	Nostoc sp. ATCC 43529	Nostoc	34	RCJ14929_7	7	MVRIQIYDLHPSSDKELINEVNAGELKTVQGGVQSNATGRQFSNTFGENNPSTTTEPEPSRINSLQEVNSLLDNFRLELDKIFRRLV	4449	yes	22.65	PF04604.13	Type-A lantibiotic	0.0001
WP_073644071	Nostoc calcicola FACHB-389	Nostoc	34	WP_073644071_7	7	MVRIKIYDLYPSTNKQFLNEITVGETKKVEGGVGYTGFDRELPNTFDTNNSSSPVNPEVSSPGNSLQQVNSLLDSFRLGLDKVFQRLV	4614	yes	25.37	none	none	none
WP_096536886	Nostoc linckia NIES-25	Nostoc	34	WP_096536886_7	7	MVRIQIYDLHPSADKEPIDEISAGEMKRVQGGVLSNSMGREFSNSLEGNNPSTTTEPQSSRVNSLQEVNALLDNFRIELDKVFRRLV	4380	yes	24.08	none	none	none
WP_096559014	Nostoc sp. NIES-4103	Nostoc	34	WP_096559014_2	2	MVRIEISDLHSHVDEPLLNEITHREIKVVEGGVVARRDPYSIYRNDIPNTENTDNRSNNDTSIASTLRQVNGLLDNLRLELDKIFGRL	5882	yes	31.34	PF15958.5	Domain of unknown function (DUF4761)	7.4e-06
WP_099071810	Nostoc linckia z15	Nostoc	34	WP_099071810_5	5	MVRIKVYELHPSADKELINEITAREMKTVEGGVGSNPTNRQFSNTLDPINQSTTAEPESSRINSLQEVNSLLDNFRLELDKIFRRLV	4046	yes	26.85	PF15294.6	Leucine zipper	6.7e-07
WP_030452416	Herbidospora cretacea	Herbidospora	35	WP_030452416_5	5	MFALLAALLFLVALVFAIGGYAVGAVLTVTTLTIAGAVFLALHLGGYGTTWSLKK	2543	no	44.28	PF12698.7	ABC-2 family transporter protein	0.00036
WP_062348671	Herbidospora yilanensis	Herbidospora	35	WP_062348671_5	5	MFALLAAVLFLAALVFAIGGYAVGAVLTVTTLTIAGAVFLALHLGGYGTTWSLKK	2517	no	43.04	PF17628.2	Inclusion membrane protein D	6e-05
WP_062437448	Herbidospora daliensis	Herbidospora	35	WP_062437448_5	5	MFALLAAVLFLVALVFAIGGYAVGAVLTVTTLTIAGAVFLALHLGGYGTTWSLRK	2508	no	41.41	PF17628.2	Inclusion membrane protein D	0.00013
WP_137248807	Herbidospora galbida	Herbidospora	35	WP_137248807_5	5	MFALLAAVLFLVALVFAIGGYAVGAVLTVTTLTIAGAVFLALHLGGYGTTWSLRK	2518	no	34.13	PF17628.2	Inclusion membrane protein D	0.00013
WP_161483240	Herbidospora sp. NEAU-GS84	Herbidospora	35	WP_161483240_5	5	MFALLAAVLFLVALVFAIGGYAVGAVLTVTTLTIAGAVFLALHLGGYGTTWSLKK	2543	no	45.93	PF17628.2	Inclusion membrane protein D	0.00013
WP_069110514	Jiangella alba	Jiangella	36	WP_069110514_1	1	MSAQNLFGTPAEQAALSADVAERAETTEDGLAPIVIASIIYCPSIIAASYGFSC	1062	yes	40.3	none	none	none
WP_092614753	Jiangella sp. DSM 45060	Jiangella	36	WP_092614753_1	1	MSAQNLFGTPAEQAALSADVAERAETTEDGLAPIVIASIIYCPSIIAASYGFSC	1062	yes	39.67	none	none	none
WP_116947187	Jiangella sp. KE2-3	Jiangella	36	WP_116947187_1	1	MSAQNLFGTPAEQAALSADVAERAAETTEDGLAPIVIASIIYCPSIIAASYGFSC	1070	yes	45.93	none	none	none
WP_135099815	Blastococcus sp. AZ43	Blastococcus	36	WP_135099815_3	3	MSAEALFGDGPDRAEFEVQAAERADVEPDTHDHVSPVTLSIAYCPALVAATYAYEC	1158	yes	42.97	none	none	none
WP_135099815	Blastococcus sp. AZ43	Blastococcus	36	WP_135099815_2	2	MSAEALFGEGQDRTEFEELAVERAVAEETTEDNLAPIVIASIMYCPSIAAATYGFGC	1511	yes	43.44	none	none	none
WP_042619690	Agrobacterium tumefaciens	Agrobacterium	37	WP_042619690_6	6	MFANSIVTLALIALPIYVFFRWVQYDSERQDKPK	1527	yes	7.84	none	none	none
WP_062451377	Rhizobium sp. Leaf262	Rhizobium	37	WP_062451377_2	2	MFANSIFTLALIALPIYFFFRWVQYDSENQDKPK	1535	yes	9.92	none	none	none
WP_067652746	Agrobacterium bohemicum	Agrobacterium	37	WP_067652746_3	3	MTANSIVTLALIALPIYFFFRWVQYDSEKQDKQK	1486	yes	14.15	none	none	none
WP_111838980	Rhizobiales bacterium	Rhizobiales	37	WP_111838980_2	2	MFANSIVTLALIALPIYFFFRWVQYDSENQDKPK	1509	yes	10.17	none	none	none
WP_112963677	Rhizobiales bacterium	Rhizobiales	37	WP_112963677_3	3	MLANSIVTLALIALPIYLFFRWVQYDSERQDGKK	1475	yes	13.08	none	none	none
RCJ34841	Nostoc punctiforme NIES-2108	Nostoc	38	RCJ34841_3	3	MSTRANTCPCCGGSLLRHARHGELYWFCLSCRQEVPLLTVPLLNTTCLPNVETRNTGVVPQPVVNT	2723	yes	14.77	PF08273.12	Zinc-binding domain of primase-helicase	5.2e-05
WP_012409237	Nostoc punctiforme PCC 73102	Nostoc	38	WP_012409237_5	5	MSTRANTCPCCGGSLLRHARHGELYWFCLSCRQEVPLLTVIRLPNVDTRNTGVVPQPVVNT	2525	yes	18.31	PF08273.12	Zinc-binding domain of primase-helicase	2.3e-05
WP_094345265	Nostoc sp. Peltigera membranacea cyanobiont 232	Nostoc	38	WP_094345265_4	4	MSTKANTCPCCSGSLLRHARHGELYWFCLSCRQEVPLLTATRLPNVETRNTGVLPQPVVNT	2463	yes	13.22	none	none	none
WP_138498765	Nostoc sp. PA-18-2419	Nostoc	38	WP_138498765_2	2	MSTRANTCPCCGSSLLRHVRHGELYWFCLSCRQEVPLLTMTRLPNVESRNTGVLPQTAVNS	2397	yes	8.38	PF12773.7	Double zinc ribbon	1.3e-06
WP_144874993	Hyella patelloides LEGE 07179	Hyella	38	WP_144874993_3	3	MTYKSKTCPCRGNLIRRCIL	2372	yes	-20.47	none	none	none
WP_051418997	Salinispora tropica CNH898	Salinispora	39	WP_051418997_2	2	MVRAIPPVVRAIAIAQFCDERAVMSVARSRIGTSGLAAGLNAGAWAPPSVTSSSTAEV	3194	yes	13.36	none	none	none
WP_093908736	Streptomyces sp. cf386	Streptomyces	39	WP_093908736_5	5	MWFGLPGEGPAAWPAPAPPRGSLLGVSRQHLFSMVLAVSEPMAAAHCCEERAVMMVARIAHGMVGLNAGAASLPSYRPSSSAEV	2772	no	9.51	none	none	none
WP_094742457	Rhodococcus sp. 14-2483-1-2	Rhodococcus	39	WP_094742457_4	4	MVFPMFGVPPAIPAAHWVEERAEIIVARISKIANAGVDAGADAPAMPLEASSSSEV	2581	no	11.62	PF09587.10	Bacterial capsule synthesis protein PGA_cap	9.7e-06
WP_106331017	Actinoplanes italicus	Actinoplanes	39	WP_106331017_5	5	MVFETPPVARAIDSAQRVEELAAMMLARIRIGTRGLTAGLKAGAFAPASISSSSSAEVYSV	2852	yes	17.1	none	none	none
WP_157857956	Streptomyces durhamensis	Streptomyces	39	WP_157857956_3	3	MMVARIAHGMVGLNAGAASLPSYRPSSSAEV	3395	no	-5.24	none	none	none
WP_028525980	Runella limosa DSM 17973	Runella	40	WP_028525980_3	3	MKRIKSYTLGWNTLQKEGYVTLTDESQRDHSFEKVSLEEMALLQKLLYQDEAYLDEQKWLIVGWKKKG	2020	yes	26.48	none	none	none
WP_109741224	Arcicella aurantiaca	Arcicella	40	WP_109741224_4	4	MKRIVKYTIGWDIEGKEGYFTAIDETQMSHVFGKIPPSEFHILVDMLKESNVFIDNNKWIISGWEGEKH	2043	yes	26.78	PF18832.1	Large polyvalent protein-associated domain 18	6e-06
WP_122933410	Runella sp. SP2	Runella	40	WP_122933410_1	1	MKRIKSYTLGWNTTQKEGYITLTDDSQKDHSFEKISLEEMALLQKMLFQDDAYLDEQQWLIVGWKKRD	2051	yes	28.88	none	none	none
WP_141234752	Flectobacillus sp. BAB-3569	Flectobacillus	40	WP_141234752_1	1	MVLGSAKKIFTFTPMQTIKTYTIGWDVINKVGYLTILDDTGKEHIFSELSLDELTFLQSMLQNPSVLIDPQNWIVAGWQINSSVNMGK	2042	yes	22.47	none	none	none
WP_166551441	Cellulophaga sp. BC115SP	Cellulophaga	40	WP_166551441_2	2	MQTIKTYTIGWDVINKVGYLTILDETGNEHVFSELSLEELTFLQSMLQSPSVLIDPQNWIVAGWQINSSVNMGK	2148	yes	14.36	PF15869.5	TolB-like 6-blade propeller-like	1.5e-05
WP_030452416	Herbidospora cretacea	Herbidospora	41	WP_030452416_2	2	MGSLGPTELIIIGLIIILLFGAKKLPDTARALGQSLRLFKKETQKLREEDDDKSTVVQAQAETVTPQPAPVPPAQIPPATPTPSVEDRLRQLEEENAKLRATSQPAAQPSDKKN	7316	no	69.76	PF02416.16	mttA/Hcf106 family	7.9e-24
WP_062348671	Herbidospora yilanensis	Herbidospora	41	WP_062348671_2	2	MGSLGPTELIIIGLIIILLFGAKKLPDTARALGQSLRLFKKETQKLREEDDDKSTVVQAQAETVTPQPAPAPPAQIPPATPTPSVEDRLRQLEEENAKLRATSQPAAQPSDKKN	7290	no	69.65	PF02416.16	mttA/Hcf106 family	7.7e-24
WP_062437448	Herbidospora daliensis	Herbidospora	41	WP_062437448_2	2	MGSLGPTELIIIGLIIILLFGAKKLPDTARALGQSLRLFKKETQKLREEDDDKSTVVQAQAETVTPQPAPAPPAQIPPATATPSVEDRLRQLEEENAKLRATSQPAAQPSDKKN	7285	no	71.03	PF02416.16	mttA/Hcf106 family	7.7e-24
WP_137248807	Herbidospora galbida	Herbidospora	41	WP_137248807_2	2	MGSLGPTELIIIGLIIILLFGAKKLPDTARALGQSLRLFKKETQKLREEDDDKSTVVQAQAETVTPQAAPVPPAQIPPATPTPSVEDRLRQLEEENAKLRATSQPAAQPSDKQN	7289	no	71.66	PF02416.16	mttA/Hcf106 family	5.4e-24
WP_161483240	Herbidospora sp. NEAU-GS84	Herbidospora	41	WP_161483240_2	2	MGSLGPTELIIIGLIVILLFGAKKLPDTARALGQSLRLFKKETQKLREDDDDKATVVQAETVTPQPAPAPPAQIPPATPTPSVEDRLRQLEEENAKLRATSQPAAQPSDKKN	7316	no	64.58	PF02416.16	mttA/Hcf106 family	1e-23
WP_042619690	Agrobacterium tumefaciens	Agrobacterium	42	WP_042619690_5	5	MTNPEKIYLITIRHSEPQPDNWQETFSQISGITLISTTGRHARIKATPENLKSALVALGPNAMAEEELPRHI	4449	no	14.32	PF05221.17	S-adenosyl-L-homocysteine hydrolase	1.7e-05
WP_062451377	Rhizobium sp. Leaf262	Rhizobium	42	WP_062451377_1	1	MTESEKIYLITFRHDAPQPPDWQSNLSKIPGLRLLSTTGRYARITCTAETLTKARATLGQDAIIEEEIPRYF	4360	no	13.7	PF02843.16	Phosphoribosylglycinamide synthetase, C domain	1.1e-05
WP_067652746	Agrobacterium bohemicum	Agrobacterium	42	WP_067652746_2	2	MTEPEKTYTATFRHNARQPQDWQKTLSRIPGLTLISATGRHARIKGTLEAIAKLGDDVIVEEELPRYL	4738	no	22.06	none	none	none
WP_111838980	Rhizobiales bacterium	Rhizobiales	42	WP_111838980_1	1	MSKSRKIYRITFRHDATPPANWQTILSNTPGLTLLATTGRHARIEAAPEALDTLRAIMGDGVMMEEEMQRYF	4555	no	20.86	none	none	none
WP_112963677	Rhizobiales bacterium	Rhizobiales	42	WP_112963677_2	2	MTDPQKQYIMTFRHNAKQPPAWQQIVAEIPGVTVISILGRQSRIKANAAAIRALREQFSSDILIEEDLPRHF	4467	no	21.01	PF11272.8	Protein of unknown function (DUF3072)	9.7e-06
WP_007095313	Kordia algicida OT-1	Kordia	43	WP_007095313_1	1	MDKSYYNPRDLKKFGSITEWSEELGNKFFEYYGKVFEEGALTPREKSLIALAVAHTEQCPYCIDAYSQDGLQRGITKEEMMEAIHVGAAIKSGATLVHGVQMMNKVNKLEM	1773	yes	51.38	PF02627.20	Carboxymuconolactone decarboxylase family	6.4e-22
WP_052752730	Kordia zhangzhouensis	Kordia	43	WP_052752730_1	1	MDKSYYNPRDLKKFGSIAEWSKELGEKFFEYYGKVFEEGALTPREKSLIALAVAHTEQCPYCIDAYTQDGLQRGITKEEMMEAIHVGAAIKGGATLVHGVQMMNKVNKLEM	1659	yes	54.91	PF02627.20	Carboxymuconolactone decarboxylase family	2.2e-23
WP_053002257	Kordia jejudonensis	Kordia	43	WP_053002257_1	1	MDKSYYNPRDLKKFGSITEWSEELGNKFFEYYGKVFEEGALTPREKSLIALAVAHTEQCPYCIDAYSQDGLQRGITKEEMMEAIHVGAAIKSGATLVHGVQMMNKVNKLEM	1808	yes	49.1	PF02627.20	Carboxymuconolactone decarboxylase family	6.4e-22
WP_114901352	Kordia sp. SMS9	Kordia	43	WP_114901352_1	1	MDKSYYNPRDLKKFGSITEWSEELGNKFFEYYGKVFEEGALTPREKSLIALAVAHTEQCPYCIDAYSQDGLQRGITKEEMMEAIHVGAAIKSGATLVHGVQMMNKVNKLEM	1592	yes	43.51	PF02627.20	Carboxymuconolactone decarboxylase family	6.4e-22
BAU44627	Leptolyngbya sp. O-77	Leptolyngbya	44	BAU44627_3	3	MVTTLNKPSSLIHEIQLEKVGNWSLFKFSESLQLRMETLLEKKKADQLTPDEVAELDAIGELDRIFTHINAMLATQHADQ	2507	no	25.9	PF08910.10	Aida N-terminus	4.6e-06
BAZ15600	Calothrix sp. NIES-4071	Calothrix	44	BAZ15600_1	1	MAPQVITPVLMIEPSSWLRAGINIEKVDGVNLVKLTNDIHTRLEELLEKRKAESLTSQEEAEYAGITELERILTFVNAKLIANCYH	654	no	31.88	PF05979.12	Bacterial protein of unknown function (DUF896)	3.8e-06
RCJ34841	Nostoc punctiforme NIES-2108	Nostoc	44	RCJ34841_2	2	MTPQVITPVWMIEPSSWLRSGITIEKVDNVNLAKFTDELHTRLEELLEKRKSGLLTPEEEAEYAGIAELERILTFVNAKLIASRGC	4205	yes	35.04	PF13887.6	Myelin gene regulatory factor -C-terminal domain 1	5.7e-06
WP_096620836	Calothrix sp. NIES-3974	Calothrix	44	WP_096620836_2	2	MITQMMVQPSSWVESGIKISKVRDLYLFKFTPELQSRLDDLNDKKKLDTLTSEEEAELTGILELDRIFTLLNAKIIAES	1451	yes	23.74	none	none	none
WP_008180360	Moorea producens 3L	Moorea	45	WP_008180360_5	5	MTFSTNTITKSTMYTTVDETGVLNNYAPETEIYYADFPTLEQQRNYITQGAIASFLVSLLILTAFGIS	5293	yes	21.41	PF12216.8	Immune evasion protein	5.7e-06
WP_008180360	Moorea producens 3L	Moorea	45	WP_008180360_6	6	MTFSTDTMTKSTMYTTVDETGVLNNYAPETEIYYADFPSVEQQRNYISQGAIASLLVCLLILTAFGIS	4699	yes	20.72	none	none	none
WP_008180360	Moorea producens 3L	Moorea	45	WP_008180360_8	8	MTFSTNTMTKSTMYTTVDETGVLNNYAPETEIYYADFPTLEQQRNYISQGAIASLLVCLLILTAFGIS	4142	yes	12.2	none	none	none
WP_087592205	Cyanobacteria unicellular cyanobacterium SU3	Cyanobacteria	45	WP_087592205_10	10	MFTTSDENGILNNFANEPDMYYATYPTQQQQRGYLVQGVFATLLIIGLGVVVTLIS	5424	no	19.01	none	none	none
RZJ53728	Flavobacterium sp.	Flavobacterium	46	RZJ53728_2	2	MLTTIKTNMCLHDIAKKKLLSIKF	2772	yes	-5	none	none	none
WP_047775239	Flavobacterium sp. ABG	Flavobacterium	46	WP_047775239_1	1	MRQLLFILLSEYYMTIKTIMCLHAKEKKL	2694	yes	6.54	none	none	none
WP_047775239	Flavobacterium sp. ABG	Flavobacterium	46	WP_047775239_2	2	MLKRKSYSPYLFQTISKSTKKQGRKPKNPKKE	2618	yes	2.45	none	none	none
WP_166925083	Flavobacterium sp. JXAS1	Flavobacterium	46	WP_166925083_1	1	MRQMLFILLPECYMAIKTNMCLHAIEESYRPYLFQTISKSTKEQGRKPKNPKKE	2960	yes	11.46	none	none	none
WP_037567380	Staphylococcus agnetis	Staphylococcus	47	WP_037567380_1	1	MTTALPNCPSCGSEYTYQDGALYVCPMCAHEWTPESVVEAEEAAIIRDANGNELKDGDTVAVIRDLKVKGASSTIKQGTKVKNIRLVDPEDGHDIDCKIPGFGQIGLKSEVVKKIN	5805	no	46.77	PF06221.13	Putative zinc finger motif, C2HC5-type	2.6e-05
WP_096547181	Staphylococcus delphini	Staphylococcus	47	WP_096547181_3	3	MTTAIPNCPQCDSEYTYEDGGLYICPMCAYEWTNDTLEAAAEQAVIRDANGNPLQDGDTVAVIRDLKIKGSSQMIKQGTKVKNIKLVDPEDGHDIDCKIPGFGQIGLKSEVVKKIK	5271	no	36.74	PF10080.9	Predicted membrane protein (DUF2318)	5.3e-05
WP_141366901	Glutamicibacter uratoxydans	Glutamicibacter	47	WP_141366901_1	1	MSDTLPPCPKCSSEYTYEMDALLVCPECGHEWNAEAEESPAAELVIKDAVGNVLQDGDTVSITKTMKVKGAQSALKAGTKVRNIRLVPDNGDHDIAAKVDGFGQMELKSSIVKKI	3993	yes	37.38	PF09723.10	Zinc ribbon domain	0.016
WP_162681093	Staphylococcus sp. MI 10-1553	Staphylococcus	47	WP_162681093_2	2	MTTAIPNCPQCDSEYTYEDGGLYICPMCAYEWTNDTLEAATEQAIIRDANGNPLQDGDTVSVIRDLKIKGSSQMIKQGTKVKNIKLVDPEDGHDIDCKIPGFGQIGLKSEVVKKIK	5600	no	37.19	PF10080.9	Predicted membrane protein (DUF2318)	5.9e-05
BAZ86949	Dolichospermum compactum NIES-806	Dolichospermum	48	BAZ86949_1	1	MAWTQVLAANALAAGAREVVKVGDRKILLLNHENQIYAVDDTCPHLKMSLKKGKIEDGAIVCPFHRSAFDLGNGEVKTWCPFPPVVGKLLSMVSSQKTLPTYPIKVEAGNILIDV	4989	yes	51.61	PF00355.26	Rieske [2Fe-2S] domain	1.5e-21
OBQ23191	Anabaena sp. WA113	Anabaena	48	OBQ23191_1	1	MAWTQVLAANALTEGAREVVKVGERKILLLNHENQLYAVDDTCPHLKMSLKKGKIENGAIVCPVHRSAFDLGNGEVKTWCPFPPVVGKLLSMVSSEKTLPTYPLKVEEGNILIDV	4635	yes	52.14	PF00355.26	Rieske [2Fe-2S] domain	1.7e-21
WP_027403439	Aphanizomenon flos-aquae NIES-81	Aphanizomenon	48	WP_027403439_1	1	MAWTQVLAANALAAGAREVVKVGDRKILLLNHENQLYAVDDTCPHLKMSLKKGKIEDGAIVCPFHRSAFDLGNGEVKTWCPFPPVVGKLLSMVSSEKTLPTYPIKVEAGNILIDV	5060	yes	49.99	PF00355.26	Rieske [2Fe-2S] domain	2.3e-21
WP_168646604	Dolichospermum sp. UHCC 0259	Dolichospermum	48	WP_168646604_1	1	MAWTQVLAANALAAGAREVVKVGDRKILLLNHDNQLYAVNDTCPHLKMSLKKGKIEDGAIVCPFHRSAFDLGNGEVKTWCPFPPVVGKLLSMVSSEKTLPTYPIKVEAGNILIDV	4659	yes	52.99	PF00355.26	Rieske [2Fe-2S] domain	8.3e-22
BAZ15600	Calothrix sp. NIES-4071	Calothrix	49	BAZ15600_3	3	MQLQYFLIISAALFCIGIFGLITSRNAVRVLMSIELLLNAVNLNLMAFSNYLDPAEIKGQVFTVFVITVAAAEAAVGLAIVLAIYRNRDTVDMEQFNLLKW	5760	no	20.49	PF17159.4	Membrane-associated sensor domain	0.0086
TWH40986	Calothrix desertica PCC 7102	Calothrix	49	TWH40986_2	2	MQLQYFLILAAALFCIGIFGLITSRNAVRVLMSIELLLNAVNLNLMAFSNYLDPVEIKGQVFTVFVITVAAAEAAVGLAIVLAIYRNRDTVDMEQFNLLKW	5227	no	26.29	PF05360.14	yiaA/B two helix domain	0.00014
WP_026093360	Calothrix sp. PCC 7103	Calothrix	49	WP_026093360_2	2	MQLQYFLILAAALFCIGIFGLITSRNAVRVLMSIELLLNAVNLNLMAFSNYLDPAEIKGQVFTVFVITVAAAEAAVGLAIVLAIYRNRDTVDMEQFNLLKW	5400	no	23.71	PF05360.14	yiaA/B two helix domain	0.00014
WP_073619367	Calothrix sp. HK-06	Calothrix	49	WP_073619367_2	2	MQLQYFLILAAALFCIGIFGLITSRNAVRVLMSIELLLNAVNLNLMAFSNYLDPVEIKGQVFTVFVITVAAAEAAVGLAIVLAIYRNRDTVDMEQFNLLKW	3522	no	23.99	PF05360.14	yiaA/B two helix domain	0.00014
WP_015659226	Streptomyces davaonensis JCM 4913	Streptomyces	50	WP_015659226_3	3	MLGSLGKKEAHLIALSDLDEAREAVRQALAGASAADEPGLRAALGILDGFAGSDPRVRWVARVLGERGIDPHTHEVAAIKALRDALPGLSLVAASTLVKEARQAA	2091	no	44.06	PF07336.11	Putative stress-induced transcription regulator	0.00021
WP_054237388	Actinobacteria bacterium OK006	Actinobacteria	50	WP_054237388_1	1	MRSTKHLNLAVLHDLDAARGAIEEALAGADPARAPGLRRALSILEASAHSDDDLKIRWARQYLAEAGVPAGDTSAHAIRELRRAVPKLGLAEAVELVTLAAKH	6670	no	63.02	none	none	none
WP_060892878	Streptomyces europaeiscabiei	Streptomyces	50	WP_060892878_1	1	MFGNKETHLVALSDLDDAREAVRQALADASATDTPGLRAALSILDGFTGSDPRVRWVVKVLAEQGIDPRTNEVAAIKALRDALPGLSLVAATTLAREAKLSQTV	2209	no	69.31	PF13428.6	Tetratricopeptide repeat	8.4e-05
WP_153461219	Streptomyces kaniharaensis	Streptomyces	50	WP_153461219_1	1	MFSSRETHLVVLRELDVVRTALREALAAAGPDEQRGLERALSVLDGLSGNEQQLKAKWVVGLLQHAGIDPRTEEMSAVRELRRAIPGLGLAAAVDLVKQANAAV	5601	yes	71.75	none	none	none
WP_015193424	Stanieria cyanosphaera PCC 7437	Stanieria	51	WP_015193424_1	1	MGIIAWIVLGLIAGAIAKLIYPGSQGGGIFATIGLGILGALVGGYLGQVLLGSSGAAAASVGALTIPSIIFAVLGSLLLIFIWGLITRRAA	6772	no	60.12	PF02990.16	Endomembrane protein 70	1.4e-05
WP_015193424	Stanieria cyanosphaera PCC 7437	Stanieria	51	WP_015193424_2	2	MGIIAWIVLGLIAGALAKLIYPGHQGGGIFATIGLGILGALVGGYLGQVLLGSSGAAAASAGALTIPSIIFAVLGAMILIFIWGLITRRAA	6423	no	56.08	PF02990.16	Endomembrane protein 70	1.1e-05
WP_016495430	Pseudomonas resinovorans NBRC 106553	Pseudomonas	51	WP_016495430_1	1	MGIIGTIIIGLIVGVIARFIKPGDDSMGWIMTILLGIGGSLLATYGGQALGIYQAGQAAGFIGAVIGAVVLLVIYGLVKKS	2058	yes	66.24	PF04226.13	Transglycosylase associated protein	0.014
WP_109003510	Streptomyces rishiriensis	Streptomyces	51	WP_109003510_1	1	MGIIAWIIIGLLAGAIAKALMPGKDPGGIIITMLIGIAGGLLGGWLGKVIFGVDSIDGFFDLSTWIAAIVGSFILLALYRLVTGNRHSHRHA	3604	no	75.79	PF06738.12	Putative threonine/serine exporter	0.00013
WP_015189896	Gloeocapsa sp. PCC 7428	Gloeocapsa	52	WP_015189896_4	4	MANTKSAIKRIKIAERNRLRNKAYKSAVRTLMKKYLTAVDIYAANPTPEAKQEVLSHMAAAYSKIDKAVKRGVLHPNNGARKKSRLVKRLRQHEQAEATGN	5514	no	12.94	PF01649.18	Ribosomal protein S20	7.7e-33
WP_096597905	Calothrix sp. NIES-2100	Calothrix	52	WP_096597905_1	1	MYILIVFLELTVANTKSALKRAEIGERNRLRNKAYKSAVKTLMKKYLNAVNVYAANPTPELNQEVQARLSEAYSKIDKAVKRGILHPNNGARKKSRLAHKLKPLTQTAQ	4495	yes	19.57	PF02507.15	Photosystem I reaction centre subunit III	6e-05
WP_099700413	Chroococcales cyanobacterium IPPAS B-1203	Chroococcales	52	WP_099700413_5	5	MANTKSAIKRIKIAERNRLRNKAYKSAVKTLMKKYLTAVDTYAADPTPEAKQEVLSRMAAAYSKIDKAVKRGVLHPNNGARKKSRLVKRLKQHEQAEATGN	6400	no	17.35	PF01649.18	Ribosomal protein S20	2.7e-33
WP_105222244	Gloeocapsopsis sp. AAB1 = 1H9	Gloeocapsopsis	52	WP_105222244_4	4	MANTKSAIKRIKIAERNRLRNKAYKSAVRTLMKKYLTAVDTYAANPTPEAKQEVLSRMAAAYSKIDKAVKRGVLHPNNGARKKSRLVKRLKQHEQVEATGN	5415	no	15.25	PF01649.18	Ribosomal protein S20	3.1e-33
WP_027402982	Aphanizomenon flos-aquae NIES-81	Aphanizomenon	53	WP_027402982_5	5	MPITVSDIYPLGREQIFNDLSIEELTNIIGGYRSRRGNYRSTETPLSLNIDTQLQDWRTELNTMMDDLRQRFDT	2733	yes	26.71	PF04604.13	Type-A lantibiotic	7.6e-06
WP_104387267	Cuspidothrix issatschenkoi CHARLIE-1	Cuspidothrix	53	WP_104387267_2	2	MWITVSNIDPLTNQQILHDLTMEELTSIVGGYTRRRRNTRSTETPLPRNIDIQLQDWRTELNTMMDDLRKGFGT	2236	yes	31.52	PF04604.13	Type-A lantibiotic	1.7e-06
WP_168496018	Anabaena sp. UHCC 0204	Anabaena	53	WP_168496018_2	2	MRITVADIYPHSSEQMLNDLTLEELTNVVGGYRRRRRRGSRYVEPSINLDIDTELESWRTELNTMMEDLRDDFSN	2271	yes	20.07	PF04604.13	Type-A lantibiotic	1e-05
WP_168501874	Anabaena sp. UHCC 0187	Anabaena	53	WP_168501874_3	3	MRITVSDIYPLSSEQILKDLTIRELTTVIGGYRRQRTLPGNIETQLQEWRVELNTMRNRLR	2250	yes	19.89	none	none	none
BBC15200	Streptomyces sp.	Streptomyces	54	BBC15200_2	2	MAAAAITLPCASSSGEMPAFSSRNACSSSGLTPASSSRAFSPAAGSMTARCSSVIDASASWILLTRSANAASSTAETIASD	1190	no	0.33	none	none	none
WP_039653089	Streptomyces sp. MUSC 125	Streptomyces	54	WP_039653089_2	2	MAAAAITLPCASSSGEMPAFSSRKACSSSGLTPASSSRAFSPDAGSMMARCSSVIDASASWILLTRSANAVSSTAETIASDI	1199	no	-11.99	none	none	none
WP_046417231	Streptomyces malaysiense	Streptomyces	54	WP_046417231_2	2	MTARCSSVIDASASWILLTRSANAVSSTAETIASDM	1341	no	-2.82	none	none	none
WP_159037419	Streptomyces sp. NRRL S-4	Streptomyces	54	WP_159037419_2	2	MAAMTLPCASSSGDMPAFSSRNACRSSGLTPASSSRAFSPAAGSITARCSSVIASSASLILLTRSLNATSST	1200	no	-7.83	none	none	none
KKT87137	Candidatus Moranbacteria bacterium GW2011_GWC2_45_10	Candidatus	55	KKT87137_2	2	MTKIAINGFGRIGRPSLKIAFEKESLSVVAINDLTDIETVAHLLKYDSSYGIYQRDVNVDKENSELIIDGTRIKYFSEKDPANLPWGELGVDVVLECTGAFLERKKS	942	yes	16.9	PF01113.20	Dihydrodipicolinate reductase, N-terminus	4e-06
WP_068208510	Rathayibacter tanaceti	Rathayibacter	55	WP_068208510_3	3	MIAHAHFGRCRVPALRIRST	1018	no	-4.28	none	none	none
WP_068252194	Rathayibacter tritici	Rathayibacter	55	WP_068252194_3	3	MIAHAHFGRYRVPALRIRST	1018	no	-3.54	none	none	none
WP_125690181	Amycolatopsis sp. WAC 04169	Amycolatopsis	55	WP_125690181_3	3	MSGTASAQEHPGGCAVAGCEAAGLVEVQTIVHEHAGVCTAPVAIRTSIHGSANELCTRSGAQFVR	6088	yes	-1.12	none	none	none
WP_086835908	Nostoc sp. RF31YmG	Nostoc	56	WP_086835908_9004	9004	MTNNNTKNSVALLRVNSSQTKQAQVKHTTKLSVSELSEEELSQVCGGGTGYVSWD	10717	yes	18.72	NF033456.1	RiPP_CCRG-2: CCRG-2 family RiPP	8.3e-06
WP_086835908	Nostoc sp. RF31YmG	Nostoc	56	WP_086835908_9007	9007	MTNNNTKNSVALLRVNSSQTKQAQVKHTTKLSVSELSEKELSQVCGGGSGYVEWD	10993	yes	16.66	NF033456.1	RiPP_CCRG-2: CCRG-2 family RiPP	0.00022
WP_086835908	Nostoc sp. RF31YmG	Nostoc	56	WP_086835908_9005	9005	MKNNNTKNSVALLRVNSSQTKQAQVKHTTKLSVSELSEEELSQVCGGGGGFVDWN	10441	yes	18.6	NF033456.1	RiPP_CCRG-2: CCRG-2 family RiPP	8.3e-06
WP_086835908	Nostoc sp. RF31YmG	Nostoc	56	WP_086835908_9006	9006	MTNNNTKNSVALLRVNSSQTKQAQVKHTTKLSVSELSEEELSQVCGGGAGSVSWD	10165	yes	18.29	NF033456.1	RiPP_CCRG-2: CCRG-2 family RiPP	8.3e-06
WP_086760950	Nostoc sp. RF31YmG	Nostoc	57	WP_086760950_8	8	MFSNRSNPLDITIPIFVIMGISQIILGNYVLAGIFLIIALGQFVVPRVGVNNLNQLHRPEVLFVWAMITTFTCLVIYQIYKDAFS	3662	yes	29.96	none	none	none
WP_096589596	Calothrix sp. NIES-2098	Calothrix	57	WP_096589596_9	9	MFSNRSNPLDITIPIFIIMGISQIILGNYVLAGILLIIALGQFIVPRVGVHNLNQLHRPEVLFIWVMITTFTCLVIYQIYRDVIS	3543	yes	28.69	none	none	none
WP_104899482	Nostoc sp. Peltigera membranacea cyanobiont N6	Nostoc	57	WP_104899482_5	5	MFNNRLNSVDITIPLFIIMGITQIVIGNYVTAGIWLIIALGQFVVPRVGVANLNQLHRPEVIFVWLMVATLTCLVIYQIYRDVVF	2746	yes	25.13	none	none	none
WP_167721203	Tolypothrix sp. PCC 7910	Tolypothrix	57	WP_167721203_7	7	MFSNRSNALDITIPLFIIMGISQVIVGNYVAAGIWLIIALGQFVVPRVGVNNLNQLHRPEVLFVWLMIITFTCLVIYQIYIDAVS	3693	yes	26.34	none	none	none
BAU44627	Leptolyngbya sp. O-77	Leptolyngbya	58	BAU44627_5	5	MTNKQLSQHQPAGIDLFLGIEGLSQVLTEENELLITGGRRRNSTPPRRNPRRVVRRRTTRRVVRRRNIFTT	280	yes	14.03	PF01507.19	Phosphoadenosine phosphosulfate reductase family	4.1e-06
RMF68567	Cyanobacteria bacterium J069	Cyanobacteria	58	RMF68567_2	2	MRNEQLSGFQPAGIDLFLGIEGLAQELTAENELLITGGQRRNSTSARRPRRRVVRRRTTRRVLRRRNISTT	306	yes	11.89	none	none	none
WP_172358022	Thermoleptolyngbya sp. PKUAC-SCTA183	Thermoleptolyngbya	58	WP_172358022_2	2	MTNKELSQHQPAGIDLFLGIEGLAQVLTEENELLITGGRRRNSTPPRRNTRRVVRRRTTRRVVRRRNLSTT	418	yes	15.47	PF01507.19	Phosphoadenosine phosphosulfate reductase family	2.5e-06
SFK92261	Amycolatopsis sacchari	Amycolatopsis	59	SFK92261_3	3	MNTTEETATGLDLSVQELEVMVGLGGNCGGNVDPNACDASLGGAISLSIAASVILIT	1656	yes	39.68	NF033629.0	RiPP_CPAC: RiPP peptide	4.3e-08
WP_093601002	Lentzea waywayandensis	Lentzea	59	WP_093601002_6	6	MQNTLQELDLSFQELEVLEGLGNCAGVDQKTCDVLTGTGVSMSVAGITLTIVLT	1505	yes	30.65	none	none	none
WP_125792341	Amycolatopsis sp. WAC 01376	Amycolatopsis	59	WP_125792341_1	1	MDTSTKPELDLSVQELELMVGLGGNCGGNVDPVACDASLGGAISLSVAFTVAVIT	1571	yes	28.35	NF033629.0	RiPP_CPAC: RiPP peptide	1.9e-08
AGP61345	Streptomyces rapamycinicus NRRL 5491	Streptomyces	60	AGP61345_2	2	MPHPPHPYVGMWVTADGFIRQELLATGRYDEARGNRKSAYTGSYTVTGNHIDYRDDTGFTATGDVRDGILFHEHLVLYRQGDQRAKGV	6518	no	46.03	PF11512.8	Agrobacterium tumefaciens protein Atu4866	4.5e-44
WP_079291565	Cylindrospermopsis raciborskii CENA302	Cylindrospermopsis	60	WP_079291565_2	2	MNGMKTKNSMYTGVSIVSGVNILQGYRVFRII	1587	yes	-5.35	none	none	none
WP_082604641	Cylindrospermopsis raciborskii GIHE 2018	Cylindrospermopsis	60	WP_082604641_1	1	MYTGSIIVSGVNILQDYRVFRII	1587	yes	-3.94	none	none	none
ANI93503	Dietzia timorensis	Dietzia	61	ANI93503_4	4	MEHFSKDVMKFTPAPTLAREIPVTIANLLFSIIGIAILIAVSGGVDALVIGFAVVMLGYSLGRTAYVAVRGPRYDKA	3112	yes	26.66	none	none	none
WP_068099584	Rhodococcus sp. PBTS 1	Rhodococcus	61	WP_068099584_1	1	MSHFTKDVMKFGPAPTLSREIPVAVANLLFSALALAIIYAVSGGADTMFVVIAVVLVAYSLGRPLYVALRGNRPAHG	2925	yes	66.18	none	none	none
WP_068150862	Rhodococcus corynebacterioides NBRC 14404	Rhodococcus	61	WP_068150862_1	1	MSHFTKDVMKFGPAPTLAREIPVAIANLLFSALALAIIYAVSGGVDTMFVVIAAVLVAYSLGRPLYVALRGNRPAHG	2947	yes	63.48	PF01518.16	Sigma NS protein	8.8e-06
WP_008232444	Richelia intracellularis HH01	Richelia	62	WP_008232444_3	3	MYIAILASITSKNQLLVDFTNL	1392	yes	3.99	none	none	none
WP_017315790	Mastigocladopsis repens PCC 10914	Mastigocladopsis	62	WP_017315790_2	2	MHAYKTLFIYISLYEQKFKDLASVEQSSIGILAGLFRKNRILVDCANLS	1514	yes	16.03	none	none	none
WP_104386798	Cuspidothrix issatschenkoi CHARLIE-1	Cuspidothrix	62	WP_104386798_3	3	MANIAILARISGTNRLLVDNSNVS	1515	yes	-1.49	none	none	none
WP_042619690	Agrobacterium tumefaciens	Agrobacterium	63	WP_042619690_1	1	MNKNELVSAVAEKAGLTKADAASAVDAVFETVQGELKAGGDIRLAGFGSFTVSRREASKGRNPSTGAEVDIPARNVPKFSAGKGLKDAVNS	7348	no	30.68	PF00216.21	Bacterial DNA-binding protein	8e-37
WP_067652746	Agrobacterium bohemicum	Agrobacterium	63	WP_067652746_1	1	MNKNELVSAVAEKAGLTKADAASAVDAVFETVQNELKSGGDIRLAGFGSFTVSRREASKGRNPSTGAEVDIPARNVPKFSAGKGLKEAVNS	7307	no	22.95	PF00216.21	Bacterial DNA-binding protein	3.7e-37
WP_112963677	Rhizobiales bacterium	Rhizobiales	63	WP_112963677_1	1	MNKNELVSAVAEKAGLTKADAASAVDAVFETVQSELKAGGDIRLAGFGSFTVSRREASKGRNPSTGAEVDIPARNVPKFSAGKGLKDAVNS	7354	no	24.33	PF00216.21	Bacterial DNA-binding protein	4.6e-37
WP_027402982	Aphanizomenon flos-aquae NIES-81	Aphanizomenon	64	WP_027402982_4	4	MPKKIRELKNLLLQSGFTYKPAKGSHSKWIHPKLSKAIIIAGKDGSDAKQYLEKQVNEAIVELNKIETEEKEESEE	5603	yes	29.59	PF07927.12	HicA toxin of bacterial toxin-antitoxin,	1e-13
WP_148763415	Dolichospermum sp. UHCC 0315A	Dolichospermum	64	WP_148763415_4	4	MPKKIRELKNLLLQSGFTCRTGKGSHTNWYHPLLSGRVTISGKDGKDAKEYQEKDVSNAIKRIEEIKKAQEEAQNE	6118	yes	28.27	PF07927.12	HicA toxin of bacterial toxin-antitoxin,	1.3e-13
WP_168645325	Dolichospermum sp. UHCC 0259	Dolichospermum	64	WP_168645325_5	5	MPKKIRELKNLLLQSGFTCRTGKGSHTNWYHPLLSGRVTISGKDGKDAKEYQEKDVSNAIKRIEEIKKPQEEAQNE	7385	yes	26.39	PF07927.12	HicA toxin of bacterial toxin-antitoxin,	1.5e-13
PIR21572	Deltaproteobacteria bacterium CG11_big_fil_rev_8_21_14_0_20_47_16	Deltaproteobacteria	65	PIR21572_3	3	MKRLFVLSVLIVCGLCLAAPYAGAKSKKKTQDSSTQPHGGGYYNGEYHIKGKGETGPIFKWDKPINQKAEIKKAYKSPPSKTPSQSTDK	4827	yes	20.52	none	none	none
WP_068028504	Nocardia mexicana	Nocardia	65	WP_068028504_5	5	MSAVLIAVVGLLLAFAIYLGVQNAKKS	3739	yes	11.74	none	none	none
WP_084520237	Nocardia mexicana	Nocardia	65	WP_084520237_5	5	MSAVLIAVVGLLLAFAIYLGVQNAKKS	2753	yes	11.74	none	none	none
WP_015126776	Calothrix sp. PCC 7507	Calothrix	66	WP_015126776_3	3	MLQGMMFNPIIFINQHKANKTGHFSPLGLIFFAQILICQDSI	2210	no	0.58	none	none	none
WP_086837411	Nostoc sp. RF31YmG	Nostoc	66	WP_086837411_3	3	MLFRIHIFIYQHKARKTGCFSWVVIIFFWLNFNHYCLNAR	2109	no	-8.43	none	none	none
WP_138498765	Nostoc sp. PA-18-2419	Nostoc	66	WP_138498765_3	3	MTFNVIIFIYHHKAKKTGHFGWLVIIFCLNSHNLYLKALLAGNLCHLQVFGAPNKGYMSGSYESTVL	2061	no	4.02	none	none	none
WP_073619916	Calothrix sp. HK-06	Calothrix	67	WP_073619916_1	1	MSEKKQEIKLNDLNKRHPAGSEFLKEDEGYLDNLSEEELNARGGADDISVSVGGDVSTSGGDISTSGGDISIGDLR	1423	yes	39.08	PF18715.1	Phage spike trimer	7.3e-06
WP_096592804	Calothrix sp. NIES-2098	Calothrix	67	WP_096592804_1	1	MSDKKREIKLNDLNEKRPAGSEFLKKDEGYLDNLSEDELNARGGADDISISAGDYVSSGTYTSTGPGSDVSIGDLD	1421	yes	37.54	none	none	none
WP_167727925	Tolypothrix sp. PCC 7910	Tolypothrix	67	WP_167727925_1	1	MSDKKREIKLNDLNKQQGSNEQSPAGSEFMKKDEGYLDNLSEEELNARGGADDISISAGEYVSSGTYTSTGPGSDISIGDLR	1423	yes	38.78	none	none	none
AVH79628	Nostoc sp. PCC 9201	Nostoc	68	AVH79628_7	7	MRNTSQLSQFIGVSLGIAAALSFLIGLYLGFKGHSDPRTNIDKTQGEVATVINQS	42	no	15.36	PF12270.8	Cytochrome c oxidase subunit IV	5e-06
AVH79662	Desmonostoc muscorum PCC 7121	Desmonostoc	68	AVH79662_5	5	MTNLRQIDPFMALLLGIAAGAAFLIGLYLGYKEHNDPRTNINQTLEEVIAAIERQPSTFTDNSR	890	no	22.42	none	none	none
WP_096679519	Nostoc sp. NIES-2111	Nostoc	68	WP_096679519_6	6	MRDSGYINQFVTVSIGIAAGFAFLIGLYLGVKKISDRSTQSTTSIGQIMPFIDNQ	799	no	13.44	PF05957.13	Bacterial protein of unknown function (DUF883)	9.9e-06
WP_049976882	Streptomyces leeuwenhoekii	Streptomyces	69	WP_049976882_3	3	MVRMERLELTAPVNRAWQKGGGSVVRRPVRGNRSPSPGAWHPGSPDRPHRRARAAAPR	5704	yes	-3.53	none	none	none
WP_052808529	Streptomyces cyaneogriseus subsp. noncyanogenus	Streptomyces	69	WP_052808529_2	2	MVRMERLELTAPVNRAWQKGGESMEGLPVRSNRPPSTGACRPGSPDRPHRRARAAAPR	5723	yes	-1.94	none	none	none
WP_164394909	Streptomyces sp. PRKS01-65	Streptomyces	69	WP_164394909_2	2	MVRMERQEPTASMNGAWRKGGENVEGLSVRGNRPPFPCACRPVSPGRPHRRARAAAPR	5978	yes	6.6	none	none	none
WP_051715083	Streptomyces sp. NRRL S-475	Streptomyces	70	WP_051715083_2	2	MPRLALYALIVCVLSVAAAVVSFTRGSFLGIVWVLLAGLSSNMCWYYVKRARQQKSVTG	3695	no	42.87	PF13858.6	Protein of unknown function (DUF4199)	8e-07
WP_051859750	Streptomyces xanthophaeus	Streptomyces	70	WP_051859750_1	1	MPRLAVFAIVCCVLALAAAVVAFVEGSFLGIVWVLLAGLTSNMAWYYLRKAKADKAAAAARQAS	7117	no	49.45	PF12046.8	Cofactor assembly of complex C subunit B	3.2e-05
WP_095933898	Streptomyces sp. Tue6028	Streptomyces	70	WP_095933898_1	1	MPRLALYALAVCVLSVAAAVVSFAQGSWLGIVWVLLAGLTSNMAWYYLRRARAGRAGSGSVTG	3563	no	40.34	PF13858.6	Protein of unknown function (DUF4199)	2.4e-06
WP_165975342	Actinomadura sp. H3C3	Actinomadura	71	WP_165975342_4	4	MSLNTSTWRKSSYSSSNGGACVEVADLGDVVGVRDSKEPDGPMLAVTRATFTTLTAKLLQQDASERWT	6170	no	20.46	PF04149.12	Domain of unknown function (DUF397)	3.3e-25
WP_165975342	Actinomadura sp. H3C3	Actinomadura	71	WP_165975342_5	5	MDLNTATWRKSSHSAGTGGECVEMASVPGLVAVRDSKDPNGPKLIVTRSSFAALVAELKR	6550	no	17.83	PF04149.12	Domain of unknown function (DUF397)	2.8e-26
WP_165975342	Actinomadura sp. H3C3	Actinomadura	71	WP_165975342_2	2	MDLNSATWRKSSHSGTQGGSECVEVGDFHETIAVRDSKDLDGPKLIVTRGAFAVLVAELKR	5994	no	26.6	PF04149.12	Domain of unknown function (DUF397)	4.6e-23
WP_015140719	Nostoc sp. PCC 7524	Nostoc	72	WP_015140719_1	1	MTRVKRGNVARKRRNKILKLAKGFRGSHSTLFRTANQQVMKALRSAYRDRKKKKRDFRSLWITRINAAAREHGLSYSRLIGNLKKANIQLNRKMLAQLAVLDPASFSKVVEIASQVQG	5095	no	44.08	PF00453.18	Ribosomal protein L20	2.6e-53
WP_017655478	Fortiea contorta PCC 7126	Fortiea	72	WP_017655478_1	1	MTRVKRGNVARKRRNKILKLAKGFRGSHSTLFRTANQQVMKALRSAYRDRKKKKRDFRRLWITRINAAARQHGMSYSQLIGNLKKADIQLNRKMLAQLAVLDPASFGKVAELASQARG	6671	yes	51.6	PF00453.18	Ribosomal protein L20	6.8e-53
WP_103138325	Nostoc sp. CENA543	Nostoc	72	WP_103138325_2	2	MTRVKRGNVARKRRNKILKLAKGFRGSHSTLFRTANQQVMKALRSAYRDRKKKKRDFRSLWITRINAAARVHGLSYSRLIGNLKKANIQLNRKMLAQLAVLDPAGFSKVVEIASQVQG	4131	yes	45.87	PF00453.18	Ribosomal protein L20	1.7e-52
WP_018486514	Rhizobium leguminosarum bv. viciae Vc2	Rhizobium	73	WP_018486514_4	4	MAAKKPAKEHSAEAARVRLRNTLWLIINAHGGSFTLNKSHFKDYPGDEYVNIETSEDRAADTITFRATRVQTN	167	yes	16.24	none	none	none
WP_168880027	Rhizobium sp. P28RR-XV	Rhizobium	73	WP_168880027_4	4	MAAKKPEKEHSAEAARVRLRNTLWLIINAHGGSFTLNKSHFTDYPGDEYINIETSEDRDANTVTFRATRVEAN	144	yes	13.77	none	none	none
WP_168880029	Rhizobium sp. P28RR-XV	Rhizobium	73	WP_168880029_3	3	MAAKKPEKEHSAEAARVRLRNTLWLIINAHGGSFTLNKSHFTDYPGDEYINIETSEDRDANTVTFRATRVEAN	1590	no	8.77	none	none	none
WP_006619051	Arthrospira platensis YZ	Arthrospira	74	WP_006619051_1	1	MSLVISDDLVKASGFSENELLLEIVLMLFQQDKISLGKASELVGLHRMQFQKLISERGICVHYDSDEFQEDLKTLEETEWP	7149	yes	42.56	PF03683.13	Uncharacterised protein family (UPF0175)	9.2e-26
WP_006622760	Arthrospira platensis C1	Arthrospira	74	WP_006622760_4	4	MSLVISDDLVKASGFSENELFGEIVLMLFQQDKISLGKASELLGWHRMQFQKLISERGICVHYDIDEFQQDLKT	1691	yes	36.14	PF03683.13	Uncharacterised protein family (UPF0175)	1.8e-24
WP_006622760	Arthrospira platensis C1	Arthrospira	74	WP_006622760_6	6	MSLVICDDLVKASGFSENELLLEIVLMLFQQDKISLGKASELLGWHRMQFQKLISERGICVHYDIEEFQEDLKT	1296	yes	29.4	PF03683.13	Uncharacterised protein family (UPF0175)	4.3e-25
WP_012409787	Nostoc punctiforme PCC 73102	Nostoc	75	WP_012409787_7	7	MSQPPVYQPNGYEGIVLLLFLAIGSAAFGYIVGKNDKDSYLGRQQQSQHIEQKEANSNSELL	2857	yes	19.36	none	none	none
WP_073591536	Phormidium ambiguum IAM M-71	Phormidium	75	WP_073591536_6	6	MSQHCVANTNGYSAVLFFILLILSASFGYVVGKDHKEDYLNQQQTQQIDRGIQNGELES	3491	no	17.03	none	none	none
WP_168643398	Dolichospermum sp. UHCC 0259	Dolichospermum	75	WP_168643398_5	5	MSQPPVYQPNGYEAMVFFILLLAIGSAAFGYVVGKNDKDSYLDRQQQSQHIEHRETNSNDETPGKK	3102	yes	31.27	PF06072.11	Alphaherpesvirus tegument protein US9	0.00011
WP_055472496	Streptomyces pathocidini	Streptomyces	76	WP_055472496_2	2	MNAEATAEDLMAGFSFHVSGEEFIADLWDGENLASGNPMTTSLCCTAQC	1230	yes	25.58	none	none	none
WP_157777555	Nocardia terpenica	Nocardia	76	WP_157777555_2	2	MMKTMTASTQDASVEDLIAGYDFYVSATEFVDSASPARAITASGNPYTTSFCCSAQCC	4062	yes	11.6	none	none	none
WP_171084023	Streptomyces morookaense	Streptomyces	76	WP_171084023_2	2	MSTEDLMSGFSFHVDAEEFAADAWAAQDMASGNPLTTTFCCSVQCG	1192	yes	26.17	none	none	none
WP_051700182	Streptomyces sp. NRRL F-4474	Streptomyces	77	WP_051700182_5	5	MLCVAGPVAADGLCQPGIDGRGPCRLGFCQPGICGLGVCQPGIEAAVTCGSVGSPGVSSATVTAVATTWWMPAGAAERSSESPELLQVATAIPATSPSAVNT	1120	no	13.4	none	none	none
WP_051837683	Streptomyces sp. NRRL F-2580	Streptomyces	77	WP_051837683_7	7	MLCVAGPVPAGGLCQPGICWLGPCWPGPFWFGPFWPGFCQPGMETAVTCGCVGSVGVSSATVAALVVTW	1120	no	8.94	none	none	none
WP_052680420	Streptomyces sp. NRRL F-4428	Streptomyces	77	WP_052680420_6	6	MLCVAGPVVTGGLCQPGIDWLGPCRLGPCQPGICWLGLCQPGIEAAVTCGSVGSPGVSSATVTAVAVTW	1121	no	7.53	PF00711.19	Beta defensin	0.015
WP_069110514	Jiangella alba	Jiangella	78	WP_069110514_2	2	MTDAALFRVVRGTPTDEELAALTVVLTAKAAGGQQPAEPPRSAWASYWARRRAPLTPGDGAWRASALPR	5187	yes	15.57	PF13822.6	Acyl-CoA carboxylase epsilon subunit	6.9e-24
WP_092614753	Jiangella sp. DSM 45060	Jiangella	78	WP_092614753_2	2	MSDEALFRVVRGTPTDEELAALTVVLTAKAAGGPGPAEPPRSAWASYWARRRAPLTPGDGAWRASALPR	5178	yes	8.65	PF13822.6	Acyl-CoA carboxylase epsilon subunit	9.6e-24
WP_116947187	Jiangella sp. KE2-3	Jiangella	78	WP_116947187_2	2	MSDAPLFRVVKGTPTEEELAALVVVLTARAAGASAPVEPPRSAWASYWTRRPAPLTAGPGSWRASALPR	5172	yes	6.9	PF11275.8	Protein of unknown function (DUF3077)	1.7e-05
WP_094345265	Nostoc sp. Peltigera membranacea cyanobiont 232	Nostoc	79	WP_094345265_1	1	MLKDIIAVEPRENYQLHIRFEDEIEGIIDISKIVKFTGVFAPLQDKEYFATVCVNSEYGTIQWESGADLDPDVIYALITKQPIPQYQLSAVSANSAD	2732	yes	40.17	PF10387.9	Protein of unknown function (DUF2442)	4.2e-24
WP_109006830	Nostoc commune NIES-4072	Nostoc	79	WP_109006830_1	1	MLKDIIAVEPKENYQLHIRFEDDVEGVIDISKIVKFTGVFAPLQDKEYFAKVCVNPEYGTIQWESGADLDPDVIYALITKQPIPQYQLSSVSANSAD	2174	yes	39.57	PF10387.9	Protein of unknown function (DUF2442)	2.3e-24
WP_118166682	Nostoc sphaeroides	Nostoc	79	WP_118166682_2	2	MLKDIIAVEPRENYQLHIRFEDDVEGVIDISKIVKFTGVFAPLQDKEYFATVCVNPEYGTIQWESGADLDPDVIYALITKQPISQYQLSAVLANSAD	2015	yes	42.62	PF10387.9	Protein of unknown function (DUF2442)	3e-24
WP_094345265	Nostoc sp. Peltigera membranacea cyanobiont 232	Nostoc	80	WP_094345265_2	2	MPEISRFFGIIITMYYNDHPPPHFHVRYNNQKAIVSIQTVEILEGELTPRLLKLVTEWATLHQAELMEDWELARDNQTLQKISPLD	3029	yes	28.97	PF13711.6	Domain of unknown function (DUF4160)	1.3e-28
WP_109006830	Nostoc commune NIES-4072	Nostoc	80	WP_109006830_3	3	MPEISRFFGIIITMYYNDHPPPHFHVRYNNQKAIVSIQTLEILEGELTARLFKLVTEWAILHQVELMENWELARDNQTLQKISPLE	2471	yes	24.53	PF13711.6	Domain of unknown function (DUF4160)	1.8e-26
WP_118166682	Nostoc sphaeroides	Nostoc	80	WP_118166682_3	3	MPEISRFFGIIITMYYNDHPPPHFHVRYNKQKAIVSIQTLEILEGELTARLFKLVTEWATLHQGELMENWELARDNQTLQKISPLE	2312	yes	25.99	PF13711.6	Domain of unknown function (DUF4160)	3.3e-27
WP_096622718	Streptomyces sp. WZ.A104	Streptomyces	81	WP_096622718_3	3	MGVYAFTGRMVGAGGLLLALVVGAAAAPAHASAGAGTVAASATAAPLLTGAGAGAGAGGNAGAGAGAGVGTASEAVSDVVSRVTSAVSRVLCGAPLPKPVGPFMGKVKCVNGWQ	7986	yes	36.58	none	none	none
WP_097866484	Streptomyces sp. rh34	Streptomyces	81	WP_097866484_3	3	MGVCAFTRRMVGTGGMILGLVVGAAAVPAHASAGTGVVSGHGGAATLPWGVSQAVSEGSRAVSGVLCGLPLPKGLGPDRGKPKCVNGWQ	7743	yes	36.38	none	none	none
WP_107115831	Streptomyces globisporus C-1027	Streptomyces	81	WP_107115831_2	2	MGVYAFTGKTVATGGLLLGLVLGAAAAPAHATAAPGVGTVAEEAAPRTAGTGAGIGGRGEEIASEVKEAVNRLICGAPLPKPLAPFMGKVKCVNGWQ	7906	yes	49.29	none	none	none
WP_031017311	Streptomyces sp. NRRL WC-3795	Streptomyces	82	WP_031017311_3	3	MGKIFGTGLTTFVLALLVALPLGTSLTAGGGPSVRASVNGWQ	7732	yes	28.64	none	none	none
WP_093908736	Streptomyces sp. cf386	Streptomyces	82	WP_093908736_3	3	MENRGNTGIAGNTGMTTTKAVMRRGLPVLALALMVALPVSAAVTMEVGGGPSVQVAVNGWQ	7927	yes	20.24	none	none	none
WP_141310912	Streptomyces spinoverrucosus	Streptomyces	82	WP_141310912_4	4	MENRGNTQKTCIGNAVRKGFPALALALLVTLPVSTAVTVQGGPSVQLSVNGWQ	7895	yes	16.74	none	none	none
KQP70226	Microbacterium sp. Leaf288	Microbacterium	83	KQP70226_2	2	MSVRYLITVDPDADQGTIEAGLRDAGAESVSPPAPELPDVFIATVDESVADYADRAQAVSGVRIAEPDAWVGFGGEGGAETRDIGLMPVDEPLEEPPAGDVR	1305	no	39.5	none	none	none
WP_045296661	Microbacterium trichothecenolyticum	Microbacterium	83	WP_045296661_2	2	MPVAAALVRAAARGEDGRVSVRYLITVDPDADQSSVEAGLRDAGAESVAPPAPELPDVFIATVDESVADYADRAQAVSGVRVAEPDAWVGFGGEGGTETRDIGLMPVEEPFGEPPAGDMR	1308	no	40.83	none	none	none
WP_116195863	Microbacterium trichothecenolyticum	Microbacterium	83	WP_116195863_2	2	MSVRYLITVDPDADQGAVEAGLRDAGAESVAPPAPELPDVFIATVDESVADYAERAQAVSGVRVAEPDAWVGFGGEADAEQRDIGLMPAEDLPEERPADDGR	1308	no	50.62	none	none	none
OUC15299	Alkalinema sp. CACIAM 70d	Alkalinema	84	OUC15299_1	1	MLKHFVLNLNPNAKFDWERCTLQNPITGEQPTIAGLVAQLVGEQPGSYLVAVNLEVTVLEQVPIEPVRSLSRRAIERSIETTINAPEELANPVSAEQRAEIAA	5176	no	24.1	none	none	none
WP_096537288	Nostoc linckia NIES-25	Nostoc	84	WP_096537288_1	1	MMKHYILNLNPTAKHEWDRCILRDPLTAKRPDIAKLIAEAVGADTGSYLVSVNIEVQVLEQAAVPQAEQLSLSFPEVSVPSQLREAA	4230	yes	34.79	none	none	none
WP_138498765	Nostoc sp. PA-18-2419	Nostoc	84	WP_138498765_1	1	MMKHYILNLNSTAKHEWDRCILRDPLTAKRPDIAKLIAEAVGADTGSYLVSVNIEVQVLEQAAVPQAEQLSLSFPEVSVPSQLREVA	6132	no	31.21	none	none	none
ROV70439	Streptomyces globisporus	Streptomyces	85	ROV70439_4	4	MNRWIRRSLHGAVLTAALAATAPQAFAADTDQQQPVASSAFGTPPPGYVHEESFYGRAAACQAEGKAGIAEGRWTAYFCYQALPFTPFQELYVKK	5143	yes	31.03	PF13670.6	Peptidase propeptide and YPEB domain	4.5e-05
WP_060892878	Streptomyces europaeiscabiei	Streptomyces	85	WP_060892878_5	5	MTRAIQKAVPGTVLAAMLALGAPEAYAASGGSTTGPEQQPVTSAWTPPEGFIRENSFHGKDVACEKVGRNGIAEGKWRAYICVRVLPFSPFVDLYVKK	5968	yes	33.95	PF09064.10	Thrombomodulin like fifth domain, EGF-like	1.8e-05
WP_164496180	Streptomyces sp. ADI95-16	Streptomyces	85	WP_164496180_2	2	MNRSIRRTLHGAVLASALAATAPQAFAATATQQPSAASSSFGTPPAGYVHEESFHGTAAACQTAGKAGIAAGKWTAYFCFQALPFTPFQELYVKK	5304	yes	37.93	none	none	none
WP_008180360	Moorea producens 3L	Moorea	86	WP_008180360_1	1	MTIVIALLIVGWTAAALIGTQAYFRGEQTKPIHERNWRSDSFNTLAKSVTGQETDYSVRTPAYAMDAFASNSLPNS	4961	yes	37.57	PF00541.17	Adenoviral fibre protein (knob domain)	3.9e-06
WP_008180360	Moorea producens 3L	Moorea	86	WP_008180360_3	3	MTIVIALLIVGWTAAALIGTQAYFRGEQTKPIHERNWRSNSFNKLAKSVTGQDTDYSDRTPAYAMDAFASNSLPNS	5552	yes	34.94	none	none	none
WP_008180360	Moorea producens 3L	Moorea	86	WP_008180360_2	2	MTIVIALLIVGWTAAAVIGTQAYFRGEQTKPIHERNWRSDSFNKLAKSVTGQDTDYSVRTPAYAMDAFASNSLPNS	4403	yes	37.56	none	none	none
WP_035905443	Knoellia subterranea KCTC 19937	Knoellia	87	WP_035905443_2	2	MAQGTVKWFNAEKGFGFIAQDGGGPDVFVHYSAIDTQGYRSLDENQQVEFEVTQGPKGPQAEQVRPL	6750	yes	44.82	PF00313.22	'Cold-shock' DNA-binding domain	7.7e-35
WP_053706403	Streptomyces sp. WM6373	Streptomyces	87	WP_053706403_1	1	MALGTVKWFNSEKGFGFIEQDGGGPDVFAHYSNIATQGFRELTEGQRVSFDVTQGQKGPQAENIIPA	3966	yes	56.81	PF00313.22	'Cold-shock' DNA-binding domain	5e-34
WP_055421432	Streptomyces pactum	Streptomyces	87	WP_055421432_1	1	MSWFAQTARAGVRAVCCAMPEDQDDHLRVRTVRIRYRLKGKGMASGTVKWFNSEKGFGFIAQDGGGPDVFAHYSNINAQGYRELQEGQAVTFDITQGQKGPQAENITPA	5874	yes	53.13	PF00313.22	'Cold-shock' DNA-binding domain	7.8e-34
AGP61345	Streptomyces rapamycinicus NRRL 5491	Streptomyces	88	AGP61345_3	3	MITTTGTGVPTAMDAYAVGVAAWRLGAGRARKDDAVRAGTGVEPRAKPGDTVAAGQRLLTLPTDTPERFDYAIEALAGAVEIAPEGTEFTPTPIALDRIA	2733	yes	45.39	PF07831.13	Pyrimidine nucleoside phosphorylase C-terminal domain	4.3e-22
BAZ80283	Sphaerospermopsis kisseleviana NIES-73	Sphaerospermopsis	88	BAZ80283_3	3	MVTEYATYRNTTMTYYTLGR	4450	yes	1.58	none	none	none
WP_071187741	Trichormus sp. NMC-1	Trichormus	88	WP_071187741_3	3	MVTEYATYRNTTMTYYALGR	5877	yes	-1.18	none	none	none
WP_052158149	Lacinutrix jangbogonensis	Lacinutrix	89	WP_052158149_1	1	MANSNCCWIIVATTGCSTDVNTEKASAVAQKSAPDDCCWIVLATTGCSTEVQSTSAEASLARKNAVADDCCWIVLATTGCSTDAETTKLVQKKTADSCCWIVVATTGCST	1663	yes	31.77	PF08727.11	Poliovirus 3A protein like	0.0053
WP_141683807	Rhizobium sp. AC27/96	Rhizobium	89	WP_141683807_1	1	MTTKDCCWILVATTGCSTADFAAAKSPAPNGCCWIILATTGCSTDAATAESSSALRQSVADDCCWIVLATTGCSTDAATAKLHSAAPQANKANDCCWIILATTGCST	1280	yes	21.03	none	none	none
WP_153354547	Rhizobiales bacterium RZME27	Rhizobiales	89	WP_153354547_2	2	MTSKNCCWIIVATTGCTTDNVAAVAAPSESCCWIVLATTGCSTDDVTVSNAITAHTSVEDDCCWIVLATTGCSTDASTVNALQGSRKSVAGDCCWIVLATTGCST	1203	yes	27.6	none	none	none
SFK92261	Amycolatopsis sacchari	Amycolatopsis	90	SFK92261_4	4	MRDTRLDLSVSELGANELSVGGLGSIDLSITELESVATPDLSSFLQSVSASAAVSSLIIAT	1426	yes	33.63	none	none	none
WP_093601002	Lentzea waywayandensis	Lentzea	90	WP_093601002_3	3	MAKLDLSFDELSPIDLSVAELDRIATPDAGDFITGVSAGATVSTIFISLLT	1306	yes	41.61	none	none	none
WP_125792341	Amycolatopsis sp. WAC 01376	Amycolatopsis	90	WP_125792341_3	3	MRTDILDLSVNEITSNELSLGGLKSIDLSITELESAAAPDVASFLGGVSAATAVSALILT	1365	yes	24.39	none	none	none
WP_030169499	Kitasatospora arboriphila	Kitasatospora	91	WP_030169499_1	1	MSFKDLIVGDHRNPREEIVAVFGEHQGADDPQAIARATTWAQGVLNTAGIPADKQVEAIAEIRRAEPRLGLKSATHLASLLKK	7516	yes	44.11	none	none	none
WP_084890433	Williamsia sp. 1135	Williamsia	91	WP_084890433_1	1	MSLKNLIVGDHRNPREEIVEVFGTGQGPDAAEAINRAITWAGGVLEAAGIPPNKQVEAIAEIRKAEPRLGLKSATHLASLLKK	7455	yes	48.59	none	none	none
WP_141936425	Microbacterium sp. SLBN-154	Microbacterium	91	WP_141936425_1	1	MAKLEKLLWGDRTDPRRELAEIFPADDASSVVRAQEWARGVVAKAGVATSDELRVIRALRDAEPRLSLKPARYLAAQLNV	7305	yes	55.58	none	none	none
WP_059262025	Streptomyces corchorusii	Streptomyces	92	WP_059262025_1	1	MVILSRYSGTMIAHHPDRDQIRIENVLSALGNPMRLTVVRVLSDGEEHNCGSILDGVSKSSMTHHWRVLRDAGVIWQRPSGRENLLSLRRADLDHRYPGLLDAILDGARSEAGLQRQD	7025	no	42.08	PF12840.7	Helix-turn-helix domain	2.3e-14
WP_087811088	Streptomyces sp. CS113	Streptomyces	92	WP_087811088_1	1	MISRHPDRDQIRIEAVLTALGHPMRLTVVRVLNDGEEHNCGSILDGVSKSTMTHHWRVLRDSGVIWQRPSGRENLLSLRREDLDTRYPGLLDAVIEGARLDDESDRASVTS	7754	no	44.87	PF12840.7	Helix-turn-helix domain	5.7e-14
WP_103811802	Streptomyces sp. Ru62	Streptomyces	92	WP_103811802_1	1	MIAHHPDRDQIRLENVLSALGNPMRLTVVRVLSDGEEHNCGSILDGVSKSSMTHHWRVLRDAGVIWQRPSGRENLLSLRRADLDHRYPGLLDAILDGARSEAGLQRQG	7034	no	41.53	PF12840.7	Helix-turn-helix domain	1.8e-14
WP_051700182	Streptomyces sp. NRRL F-4474	Streptomyces	93	WP_051700182_3	3	MSKSAAAKERAKKRSVYVFTALGLVAGIAVATWSNSGDSEDRSAAPAGIHHVVATAVTVADETPGEPTEPQVTAASIPGWQTPNPQIPGWQNPSRQGPRPSIPGWQSPSAATGPATQSI	1116	yes	53.27	none	none	none
WP_051837683	Streptomyces sp. NRRL F-2580	Streptomyces	93	WP_051837683_2	2	MTKSATAKERSKKRSVYVFTVLGLVAGIAVATLTNSGDSEDRSAAPAGIHQVTTSAATVADETPTEPTQPQVTAVSIPGWQNPGQKGPNQKGPGQQGPSQQIPGWQSPPAGTGPATQSI	1116	yes	58.12	PF16311.5	Transmembrane protein 100	2.4e-06
WP_052680420	Streptomyces sp. NRRL F-4428	Streptomyces	93	WP_052680420_5	5	MSKSATARERSKKRSVYVFTALGLVAGIAVATLTGSGDSEDRSAAPAGIHQVTATAVTVADETPGEPTEPQVTAASIPGWQSPSQQIPGWQGPSRQGPSQSIPGWQSPPVTTGPATQSI	1117	yes	41.45	none	none	none
TCK41348	Leucobacter luti	Leucobacter	94	TCK41348_1	1	MSPTLEAIDLDAELQVLCDPESSRLAEFTSRFHEFRRSLSPEEQDYLDFIRRAADVAVAEHGTALLNDIDSFEDRISVLLGDEYLVPEMGGIIIRTTVVLRCATWLLKC	1114	yes	19.47	PF14644.6	Domain of unknown function (DUF4456)	1.6e-06
WP_094261964	Microbacterium sp. Yaish 1	Microbacterium	94	WP_094261964_1	1	MSLILDTVDLDAELQVLCDPESSRLAEFTSKFHEFRNSLTPEERDYLDFIRRAADVAVAEHGRALIEDVDAFEAHISDMLGDEYIAPEMGGIVIRTTVVLKCATWLLKC	1147	yes	67.57	PF14644.6	Domain of unknown function (DUF4456)	5.6e-06
WP_146082522	Rathayibacter sp. AY2B3	Rathayibacter	94	WP_146082522_1	1	MSAVVGTIDLDAELQVLCDPESSRLAEFTVKFHEFRDSLSPEQRDYLDFIRRAADVAVAEHGKELIEDVDAFEAHISAMLGDDYIAPEMGGIVIRTTVVLKCATWLLKC	1145	yes	75.91	PF07813.12	LTXXQ motif family protein	8.8e-05
WP_015140719	Nostoc sp. PCC 7524	Nostoc	95	WP_015140719_3	3	MPKLKTRKAAAKRFRATGSGKIVRRKAFKNHLLEHKTTNKKRNLSKMAVVNERDEENVRLMLPYL	4871	no	14.72	PF01632.19	Ribosomal protein L35	3.8e-29
WP_017655478	Fortiea contorta PCC 7126	Fortiea	95	WP_017655478_2	2	MPKLKTRKAAAKRFRATGSGKIVRRKAFKNHLLEHKTSNKKRSMSKMALVHERDEDNVRLMLPYL	6443	yes	14.12	PF01632.19	Ribosomal protein L35	1.9e-27
WP_103138325	Nostoc sp. CENA543	Nostoc	95	WP_103138325_8	8	MPKLKTRKAAAKRFRATGSGKIVRRKAFKNHLLEHKTTNKKRNFSKMAIVNERDEENVRLMLPYL	3906	yes	22.74	PF01632.19	Ribosomal protein L35	1.7e-28
WP_093619522	Actinoplanes philippinensis	Actinoplanes	96	WP_093619522_2	2	MNERELLAFVAVAEHGRMDLAAKALGYSQPAVSYQIKCLEMTLGAKLFVRTSSGVTLTRSGALMLPSAQAVLTLMRGIKATTGDLALVA	6088	no	52.21	PF12373.8	Major surface glycoprotein 2 C terminal	0.00033
WP_106331017	Actinoplanes italicus	Actinoplanes	96	WP_106331017_3	3	MNQRELEAFVRVAELGRMDLAARSLGYSQPAVSYQIKCLEQALGVRLFERNSAGATITRTGALMLPSVKAVLVLMNGIKHTVSSSVRP	5224	no	39.76	PF00126.27	Bacterial regulatory helix-turn-helix protein, lysR family	5.8e-22
WP_109595189	Actinoplanes xinjiangensis	Actinoplanes	96	WP_109595189_3	3	MNERELLAFVAVAEHGRMDLAAKALGYSQPAVSYQIKCLEMTLGAKLFVRTSSGVTLSRTGALMLPSAQAVLTLMRGIKATTGDLALVA	5437	no	48.98	PF12373.8	Major surface glycoprotein 2 C terminal	0.00033
OGQ08743	Deltaproteobacteria bacterium RIFCSPHIGHO2_02_FULL_40_28	Deltaproteobacteria	97	OGQ08743_4	4	MIVSFKDKRAKELFEDLKPRGFPSDLICVARRKLLMLDAAAVLQDLRNPPGNHLEALKRERKGQYSIRINDQWRICFRFENGCAFDVEILDYH	1401	yes	13.52	PF05015.13	RelE-like toxin of type II toxin-antitoxin system HigB	3.8e-27
WP_124970176	Aphanothece sacrum FPU1	Aphanothece	97	WP_124970176_10	10	MIISFGNQGTSDLFNGVESREARKIPSQISKTALKKLDILNAAEQLDELKVPPGNRLEALKGNLKGFYSIRINSQWRIIFQWDNGKVTQVQIIDYHS	2643	yes	23.63	PF05015.13	RelE-like toxin of type II toxin-antitoxin system HigB	4.6e-27
WP_168880027	Rhizobium sp. P28RR-XV	Rhizobium	98	WP_168880027_2	2	MTRHEMIIYMVCSQQCWPTENYAPAPMVRAFSGANLLSRTTDISAITPASTAPDTLGLTTVAAIGGQPDASLHKTP	7310	yes	17.24	none	none	none
WP_168880029	Rhizobium sp. P28RR-XV	Rhizobium	98	WP_168880029_2	2	MTRHEMIIYMVCSQQCWPTENYAPAPMVRAFSGANLLSRTTDISAITPASTAPDTLGLTTVAAIGGQPDASLHKTP	4308	no	12.24	none	none	none
KQP70226	Microbacterium sp. Leaf288	Microbacterium	99	KQP70226_3	3	MMRRVAVQAATLPRKTARPASVMR	5943	yes	-10.4	none	none	none
WP_045296661	Microbacterium trichothecenolyticum	Microbacterium	99	WP_045296661_3	3	MMRRVAVQAATLPRKTARPASVMR	5945	yes	-2.01	none	none	none
RCJ25433	Nostoc sp. ATCC 43529	Nostoc	100	RCJ25433_2	2	MISPNLLEIERSIRALSVEEQLWLLESIAREIREREYTKDKFADVKPPQEELIEIASEPIIQTKFSLINDEFASSEIL	5674	no	24.81	none	none	none
WP_073642495	Nostoc calcicola FACHB-389	Nostoc	100	WP_073642495_1	1	MISPNLLEIERSIRALSVEEQLWLLESIAREIREREYTKDKFDDAKSPPEKLVEIASESTVPIKFSVNNDEFASSEIL	3885	no	19.71	none	none	none
WP_096576751	Aulosira laxa NIES-50	Aulosira	101	WP_096576751_2	2	MLSYCRNSGTSSFRHPPLKVLHSSLPTVAQALLRVLQSPPRIFISSSPKSFIKLSESRNNSAPVITMS	405	no	-2.06	none	none	none
WP_096576757	Aulosira laxa NIES-50	Aulosira	101	WP_096576757_2	2	MLSYCRNSGTSSFRHPPLKVLHSSLPTVAQALLRVLQSPPRIFISSSPKSFIKLSESRNNSAPVITMS	1381	no	-2.06	none	none	none
WP_093116829	Thermoleophilum album	Thermoleophilum	102	WP_093116829_1	1	MDDGRRFELEQMLNRPGTYFNPQTEVLVIVDDSASLDGEIFNLEPFEGAEWILISDEVPVDEARRDELLERFQDQFGGETGREVHERAVEDPDARELEGE	5388	no	58.7	none	none	none
WP_093601002	Lentzea waywayandensis	Lentzea	102	WP_093601002_8	8	MAILVDDSAEKVLPVDGEAFDLIRFE	2436	yes	9.03	none	none	none
WP_017743137	Scytonema hofmannii PCC 7110	Scytonema	103	WP_017743137_5	5	MGALNLFSVAENFLTDLSAEDESTITGGGKRGKYNSSKSGSKSRSKSRSKSKS	1575	yes	9.37	none	none	none
WP_155752488	Scytonema sp. UIC 10036	Scytonema	103	WP_155752488_4	4	MGALNLFSVAENFLTDLSAEDESTITGGGKRGKYNSSKSRSKSKSKSGSKSKS	1590	yes	10.25	none	none	none
BAZ86949	Dolichospermum compactum NIES-806	Dolichospermum	104	BAZ86949_2	2	MSIQGTPPTVPQTALAALVDAFIKQGHPSQYAQAMATSIIFQTDLDLRNAQLANLLGWLKEEHHDIYPLALSVVEKTCSDFERQVQEG	7782	no	34.51	none	none	none
WP_137908690	Dolichospermum planctonicum	Dolichospermum	104	WP_137908690_1	1	MSTEGNPANVPQEALTALVDTFVQKGHPRQYAEAMATSIIFQTDLDLRNAQIANLLGWLKQEHNDIYPLALDVVGKTSAEFERRVRQG	7322	no	40.11	none	none	none
WP_016950293	Anabaena sp. PCC 7108	Anabaena	105	WP_016950293_2	2	MVGYGWVWLKVKNFVVKLDIKPIFLLPAAVCLHNIALLGVKNFRH	4012	yes	7.48	PF06813.13	Nodulin-like	5.2e-07
WP_127056592	Trichormus variabilis SAG 1403-4b	Trichormus	105	WP_127056592_3	3	MVGSTNFLAKSDIKSVCFLSPPVCLHNIALLVVKNYRH	4269	yes	1.05	none	none	none
WP_051857755	Streptomyces cellulosae	Streptomyces	106	WP_051857755_3	3	MLISRCCPSHPLRSTGYRFSGPDSRAVGGNTADRTDTSPRWARDQQPHLTLATMLSETMVCGEGASSGVTSSAISLTSAYVSKPAASSMSFIVVSLVY	136	no	0.48	none	none	none
WP_121024930	Streptomyces sp. 3212.4	Streptomyces	106	WP_121024930_2	2	MLATTLSETMVCGEGASSGVTSSAISLTSA	195	no	-8.44	none	none	none
WP_086820173	Allokutzneria sp. NRRL B-24872	Allokutzneria	107	WP_086820173_2	2	MVGGVLRQVSESGGDSGWLASKFGQRYGRWEARVRSQATSANSVRKCIRCAPSTHQTIQLDNFHGSTMQSAVHEVDWTGSYSLTG	2386	yes	47.39	none	none	none
WP_086820178	Allokutzneria sp. NRRL B-24872	Allokutzneria	107	WP_086820178_2	2	MVGGVLRQVSESGGDSGWLASKFGQRYGRWEARVRSQATSANSVRKCIRCAPSTHQTIQLDNFHGSTMQSAVHEVDWTGSYSLTG	6723	yes	47.39	none	none	none
WP_096576751	Aulosira laxa NIES-50	Aulosira	108	WP_096576751_3	3	MLNLYQYLCLIIKLKESQQAFSLNQTGCL	5679	no	-2.18	none	none	none
WP_096576757	Aulosira laxa NIES-50	Aulosira	108	WP_096576757_3	3	MLNLYQYLCLIIKLKESQQAFSLNQTGCL	2604	no	-2.18	none	none	none
WP_013190653	Trichormus Nostoc azollae 0708	Trichormus	109	WP_013190653_2	2	MQQSAIYQDILQKGKWEGKQEGLQIGKQEGKQEAEVLLILRLVSHRFGTVEPQIEERMNQLSTTQYRKFSRSTFRFL	6497	no	21.19	PF09811.9	Essential protein Yae1, N terminal	5.8e-06
WP_062294404	Nostoc piscinale CENA21	Nostoc	109	WP_062294404_1	1	MQESVIYQDILQKGLQQGEARGKRQEALGLILRLLTRRFGAVELQTEQQIQTLSINQLEDLAEALLDFTSQNDLVNYLANLSVSS	7204	yes	45.76	PF13305.6	Tetracyclin repressor-like, C-terminal domain	1.6e-05
WP_047015652	Streptomyces sp. CNQ-509	Streptomyces	110	WP_047015652_1	1	MRYRVSFVAGIAVGYVLGSRAGRERYEQLRKAAQQFSESPAVRNAAEAAALTSRDAVTKAASTLSTKFADVVPENVASRVHFLGSGHANGTRGRREESDDWGTTNT	790	yes	63.84	PF12732.7	YtxH-like protein	3e-07
WP_051642643	Streptomyces sp. CNQ-525	Streptomyces	110	WP_051642643_1	1	MRYRVSFVAGIAVGYVLGSRAGRERYEQLRKAAQQFSESPAVRNAAEAAALTSRDAVTKAASSLSTKFADVVPENVAARVHFLHGNGHANGSRGRRDEPDDWGTTNT	2041	yes	61.58	PF12732.7	YtxH-like protein	2.5e-07
BAZ30575	Cylindrospermum sp. NIES-4074	Cylindrospermum	111	BAZ30575_2	2	MTETKSNRVARRGRLFPEIQWTEEQKNLYISELENHHQRCRVIFERLQPELIKTHHNWFMAVDAESGDYFINQDEEVVTQMCVEKYPKAIPFIFVINETGVAGRI	6464	yes	46.84	PF00930.21	Dipeptidyl peptidase IV (DPP IV) N-terminal region	4.5e-06
WP_075895564	Moorea bouillonii PNG	Moorea	111	WP_075895564_1	1	MTPSSSHHTVRRGRVFPEKRLSPEEKARIQAEDAVFYKRCREVFERVQPELIQEHYDWFIIIEPDSGEYFIDEDKKVALSKSRSKHPGKKCIIMQINETGTCGRI	6310	yes	36.5	PF07734.13	F-box associated	3.5e-06
WP_102116354	Pectobacterium aquaticum	Pectobacterium	112	WP_102116354_3	3	MAFEPEQQHSGRWMGSKFAPARHHYSQQPA	1272	no	-8.25	none	none	none
WP_110163988	Pectobacterium carotovorum subsp. carotovorum	Pectobacterium	112	WP_110163988_3	3	MAFEPVQQRSGRWMGSRFVPERHHYSPQPASADLLSPVHIEDSMSGIVPVPEPVQQRSGRWMGSRFAPERHHYSPQPA	1271	no	-11.03	PF01021.19	TYA transposon protein	4.8e-05
WP_106331017	Actinoplanes italicus	Actinoplanes	113	WP_106331017_1	1	MLTNDDFDAAGDILAELSDSEIDLDAAQAAGGLFTVPGTSTIGYVCTYSYECSFPKRLCGIGD	5666	yes	60.46	NF000539.0	plantaricin: plantaricin C family lantibiotic	2.7e-09
WP_129202808	Xylanimonas allomyrinae	Xylanimonas	113	WP_129202808_4	4	MNNAYAAAGDVTLELTAHQVDAEADATAGGLWTIPGTSTIGRFCTLSWECQGIACG	7864	yes	20.81	NF000539.0	plantaricin: plantaricin C family lantibiotic	1e-08
WP_086837411	Nostoc sp. RF31YmG	Nostoc	114	WP_086837411_1	1	MNKIINFSCVFCDWKIEPDQNTQPKQLIYTYVTLLRNVKIE	1629	yes	-3.5	PF13248.6	zinc-ribbon domain	6.9e-06
WP_096604516	Calothrix sp. NIES-2100	Calothrix	114	WP_096604516_1	1	MDLICRLPKLETALEQNTQPPLLISTYVTRLVNVKIEQCNQTVCKGTVKDVVAFWQVFVSDIGYY	1509	yes	10.61	none	none	none
TCM33822	Kribbella sp. VKM Ac-2568	Kribbella	115	TCM33822_1	1	MKELEVELGERTYRIRTEVGNAFSHLNGPIGDFELLRDMIDIYNDLNSGDKVLIRWNLIPPSASGTCRADVADRCRGMGWLAPTLQ	4439	yes	24.9	none	none	none
WP_138897977	Streptomyces chryseus	Streptomyces	115	WP_138897977_2	2	GSSRADVRTRLRGSGGCPEV	4153	no	-8.64	none	none	none
WP_017743137	Scytonema hofmannii PCC 7110	Scytonema	116	WP_017743137_2	2	MLLTEIDAGLIALEFLMAEWNISDEDRQWFVIVNSRLTGQSWYVVELSVAGLPDRWYIQVYDTGACDPDYTFVSPIRGLEGYADLKDLPYLVAEVLVSERNTR	4554	yes	43.46	none	none	none
WP_155752488	Scytonema sp. UIC 10036	Scytonema	116	WP_155752488_2	2	MLLTETDAGLIALEFLMAEWNVSDEDRQWFVIVNSRLIGQSWYVVELSVAGLPDRWYIQVYDTGACDPDYTFVSPIRGLEGYTDLKDLPYLVAEVLLSERNTR	4585	yes	38.24	none	none	none
WP_019495762	Calothrix sp. PCC 7103	Calothrix	117	WP_019495762_2	2	MAAIGTTAATLTLASTVPPSFAAPAPNCVVVRSQARKSITVQNQCRTQQRVKLIIAFGRDSACRVINPSGIVRFTWTFGNFDRLERC	2850	no	11.82	PF01356.19	Alpha amylase inhibitor	1.9e-11
WP_127078868	Calothrix desertica PCC 7102	Calothrix	117	WP_127078868_2	2	MYVNPIKNNFAKLARIAAVGTTAATLTLAGTVPPSLAAPAPSCVVVRSQARKSLTVQNQCRTQQRVKLIIAFGRDSACKVINPNGIVRFTWTFGNFDRLERC	2816	no	5.07	PF01356.19	Alpha amylase inhibitor	3e-11
PSB62113	Cyanobacteria filamentous cyanobacterium CCP1	Cyanobacteria	118	PSB62113_1	1	MFDKLTDEDLTGVSLFAGAESFLKDLSEEDESSITGGKRSRSGRLKRRRRRRRLRRLRARRRRIARSRSNSISNS	86	yes	37.09	PF02377.15	Dishevelled specific domain	1.1e-05
WP_083782609	Cyanobium sp. PCC 7001	Cyanobium	118	WP_083782609_1	1	MKLMAIESPKDRQSLGLDLLSGADSFVKDLSPELEASITGGGGGHGDKTGSRSRSGGMHKRRRSRSRSRSGKHSRKYSRKYSKSYC	141	yes	15.77	PF17069.5	Arginine/Serine-Rich protein 1	4.8e-07
WP_016863105	Fischerella muscicola SAG 1427-1 = PCC 73103	Fischerella	119	WP_016863105_1	1	MVQVVVVINTLISLILLYVAWRVWRLRLLLTRLTNLFILAERCSHALFSQAPQALDISRQNIHNLRQTNQALEVQIQQLQQIFSILFIGQRFWRRFSRRKVK	3553	yes	21.72	PF04258.13	Signal peptide peptidase	4.1e-05
WP_017311237	Mastigocladus laminosus UU774	Mastigocladus	119	WP_017311237_2	2	MVQLVVLINTVISLVLLYIAWRVWRLRLLLARLTNLFMIAERCSHALFSQAPQALDISRQNIHNLRQTNQALELQIQQLQQIFSILLIGQRFWRRFYRRKVK	3428	yes	23.9	PF10883.8	Protein of unknown function (DUF2681)	0.014
WP_013321440	Gloeothece verrucosa PCC 7822	Gloeothece	120	WP_013321440_2	2	MGEGLKENILGLLIFLKKLAESIKFRYVRDPIIILIR	4	yes	-0.02	PF18639.1	Yeast longin domain	5.8e-06
WP_049802506	Gloeothece verrucosa PCC 7822	Gloeothece	120	WP_049802506_3	3	MGEGLKENILGLLIFLKKLAESIKFRYVRDPIIILIR	1731	yes	-0.02	PF18639.1	Yeast longin domain	5.8e-06
WP_079189213	Streptomyces kebangsaanensis	Streptomyces	121	WP_079189213_3	3	MKMNSHSHVAGRMARLGVVAGAALLIGGSPMTAGNAFAADQETAVRHSTETVGERLSEKTRQLVDDVEDVLSRLPSPVNGWQ	1163	yes	34.82	none	none	none
WP_145487439	Streptomyces collinus	Streptomyces	121	WP_145487439_3	3	MSRDFHSFVSISIARIGVTAGVALVIAGAPVLFGNAFAAEQDLPIAHSTTSVGERISETVTGLVAEMGEGILPLASRVNGWQ	1178	yes	17.96	none	none	none
WP_169264744	Brasilonema sennae CENA114	Brasilonema	122	WP_169264744_2	2	MSEQKPLSPWKYKPWWCQPWSILLTGVTLMGGSWVIFKIVWLTILVSVPVLTWMGFFLIIWPQLMIRSGVLESYEDQA	6946	yes	7.87	PF01040.18	UbiA prenyltransferase family	1.2e-05
WP_169264746	Brasilonema sennae CENA114	Brasilonema	122	WP_169264746_2	2	MSEQKPLSPWKYKPWWCQPWSILLTGVTLMGGSWVIFKIVWLTILVSVPVLTWMGFFLIIWPQLMIRSGVLESYEDQA	3942	yes	7.87	PF01040.18	UbiA prenyltransferase family	1.2e-05
WP_110256027	Undibacterium pigrum	Undibacterium	123	WP_110256027_2	2	MSAARDAAFSHLAAAADVARLLPELESAIKSKGGVIRPLYAVTIQDAVARGDQVEIARIKSELASYGNLLGGASNSAAAFHPVTPYGVAIQDAQARGDQAEVDRLKELAQSLLAQLNAGK	3443	no	21.1	PF10814.8	Cell wall synthesis protein CwsA	5.2e-05
WP_162060722	Undibacterium sp. KW1	Undibacterium	123	WP_162060722_3	3	MSAARDAAFSHLAAAADVARLLPELESAIKSKGGIIRPLYAVTIQDAVARGDQVEIARIKSELASYGNLLGGVSNSAAAFHPVTPYGVAIQDAQARGDQAEVDRLKELAQSLLAQLNASK	3416	no	25.22	PF08898.10	Domain of unknown function (DUF1843)	0.01
WP_110256027	Undibacterium pigrum	Undibacterium	124	WP_110256027_1	1	MVSPTNIAPTAALYGVPIHEAIASGDLSKIVAIRNQALDYLAAASEIERLLPSLESAMKAKGLPPQALYGVAIQDAVTRGDQAEIARLKAQVAYYSRLF	1489	no	33.5	PF08898.10	Domain of unknown function (DUF1843)	1.5e-14
WP_162060722	Undibacterium sp. KW1	Undibacterium	124	WP_162060722_2	2	MVSPTHAAPLAALYAVPMHEAIASGDVKKMSTVRDQALDYLAAASEIERLLPSLETAMKAKGLPPQALYGVAIQDAVTRGDQAEISRLKAQVAYYNRLF	1471	no	32.47	PF08898.10	Domain of unknown function (DUF1843)	1.5e-14
WP_015113151	Nostoc sp. PCC 7107	Nostoc	125	WP_015113151_5	5	MIKYHSLKVKSAELKVLLAVAGRLAHAELKDHPQEVEYQTQNRKIPPTQAGTFIERESTKYFVPDSALSEKLRMGGSPVEQTSVTQNSVLSKVNWLVVEE	5028	yes	25.14	none	none	none
WP_096575011	Anabaenopsis circularis NIES-21	Anabaenopsis	125	WP_096575011_8	8	MKSAELKDYPKVVEYQLTQNKQLPPTKGRTFIEYESTKYFLPDSGAKRPATANSTQHSVLSKVNWLVVEE	5234	yes	12.05	none	none	none
WP_109497443	Streptomyces sp. Act143	Streptomyces	126	WP_109497443_5	5	METAIERLTGLISGAPPSWAAAISSAEVYAA	6230	no	7.76	none	none	none
WP_109497443	Streptomyces sp. Act143	Streptomyces	126	WP_109497443_6	6	METAIERLTGLISGAPPSWAAAISSAEVYAA	6609	no	7.76	none	none	none
AVH79607	Nostoc sp. PCC 9205	Nostoc	127	AVH79607_3	3	MNITPYLLGVIGLTLVVYGEYILGTVLLIIAGGEIVLPNLNTTTDTQATVVRFGFIVTIASLMFYRLFYIR	1961	yes	24.37	none	none	none
WP_103138325	Nostoc sp. CENA543	Nostoc	127	WP_103138325_6	6	MNITPYLFGLIGLALLIEGENILASVLFITTVAQLAFPNLNTTAGTSATILRFGLIVIIASLLIYRLFFARSRT	1292	yes	28.18	none	none	none
AWS47415	Streptosporangium sp. caverna	Streptosporangium	128	AWS47415_1	1	MTFSEALPETDEQIQRYVGMDLMAARAEAEAAGWAVVRLLEEHMPRTMDYRSDRINLTTDGTTDRFNASSGTGIVIEVDNG	2583	no	36.32	PF03793.19	PASTA domain	9.5e-05
SNT25203	Streptosporangium subroseum	Streptosporangium	128	SNT25203_2	2	MDGACKVARLGNDAVMTFSEALPETDEQIQRYVGMDLMAARAEAEAAGWAVVRLLEEHMPRTMDYRPDRINLTTDGTTDRFNASSGTGIVIEVDNG	2507	no	36.06	PF15919.5	HicB_like antitoxin of bacterial toxin-antitoxin system	2.1e-05
AFY52807	Rivularia sp. PCC 7116	Rivularia	129	AFY52807_6	6	MNKQKSPEAKAFIGNLKNGIWLFGVSSWLFGITDRSIASLSDGYLSALDLTQLFTAATFFVAWLFLKPSSTKA	7568	yes	12.87	none	none	none
RCJ25607	Nostoc minutum NIES-26	Nostoc	129	RCJ25607_1	1	MKDQQQSDSKDFVGYLKNGIWLFGLSSWVFGITDRSIASFADGYLSALDLTQLFTAATFFVGWLFLKPTNA	4734	yes	11.61	none	none	none
BBD66616	Nostoc commune HK-02	Nostoc	130	BBD66616_4	4	MLIKNIIVQASPITPAEIFRTAAPCAAKGCQHFDGQDCRGAMRIVEKLPPVAEELPPCSIRRDCRWWQQEGKAACMRCPQVITDNYNASELAVQVATPIFG	2782	yes	28.66	none	none	none
WP_006197379	Nodularia spumigena CCY9414	Nodularia	130	WP_006197379_1	1	MTEPRVAYLKQPQTMTEELIAKVSPVNPAEVFRTASTCATNNCQHFDGKDCGLVTRIVAQFPIALEELPPCSIRRDCRWWQQEGKAACMRCPQVITDNYNASELMIQVATPTVS	189	yes	34.36	none	none	none
AWS47415	Streptosporangium sp. caverna	Streptosporangium	131	AWS47415_4	4	MSACRDSASRTHGDLLSHDDAYAARLVTLAELAVSPEVRALVRPWGPPTPRRLAGIARIFGGRVEPAPSRKVPA	2851	yes	22.02	PF17940.1	Tetracyclin repressor-like, C-terminal domain	9.6e-07
SNT25203	Streptosporangium subroseum	Streptosporangium	131	SNT25203_5	5	MSACRDSASRTHGDLLSHDDAYAARLVTLAELAVSPEVRALVKPWGPPTPRRLAGIARIFGGRVHPVPSWEVPA	2820	yes	19.05	none	none	none
WP_017743137	Scytonema hofmannii PCC 7110	Scytonema	132	WP_017743137_4	4	MFPFSFWYNNSCYGGETVSRKARLESKLKFMKTMRDDLETKLAGLNAAISNVEQQLNQEDVTQV	5197	yes	18.91	PF16888.5	Domain of unknown function (DUF5082)	6.4e-06
WP_155752488	Scytonema sp. UIC 10036	Scytonema	132	WP_155752488_3	3	MFPFSFWYNNSCYGGETVSRKTRLERKLKFLKTMRDDLETKIAGLNAAISNVEQQLTQEDVTQV	7320	yes	21.8	PF16888.5	Domain of unknown function (DUF5082)	4.1e-06
WP_067598320	Nocardiopsis listeri NBRC 13360	Nocardiopsis	133	WP_067598320_2	2	MNQSANIFGDIELLSTAGAQAAQEDMSVTLDEGVDAPTSVPCGITISITLDC	6521	yes	40.94	none	none	none
WP_087103312	Nocardiopsis sp. JB363	Nocardiopsis	133	WP_087103312_2	2	MNQSANIFGDIELLSTAGAQAAQEDMSVTLDEGVDAPTSVPCGITISITLDC	6576	yes	40.39	none	none	none
WP_069110514	Jiangella alba	Jiangella	134	WP_069110514_3	3	MIDAITIGARPSSVVSARSATSADSAACSAGVPKRF	1108	no	-11.37	none	none	none
WP_116947187	Jiangella sp. KE2-3	Jiangella	134	WP_116947187_3	3	MIDAITIGARPSSVVSAARSATSADSAACSAGVPKRF	1116	no	-11.29	none	none	none
WP_089126833	Tolypothrix sp. NIES-4075	Tolypothrix	135	WP_089126833_2	2	MSEINDFKDLKIWQKGMDIAEKCYLLTKLFPKDELYGMVQQIRRSAASVPANIA	1818	yes	17.86	PF05635.11	23S rRNA-intervening sequence protein	5.8e-22
WP_089126836	Tolypothrix sp. NIES-4075	Tolypothrix	135	WP_089126836_2	2	MSEINDFKDLKIWQKGMDIAEKCYLLTKLFPKDELYGMVQQIRRSAASVPANIA	258	yes	17.86	PF05635.11	23S rRNA-intervening sequence protein	5.8e-22
AOX46105	Microbacterium sp. BH-3-3-3	Microbacterium	136	AOX46105_4	4	MSTSSFTALARVSGILASLIGLVGAIVLFVLGQPLLSAVFAVFAIAGVGTIAVAPRRGR	3560	yes	14.4	PF06686.11	Stage III sporulation protein AC/AD protein family	1.7e-06
WP_008380405	Gordonia malaquae NBRC 108250	Gordonia	136	WP_008380405_1	1	MKVPVVAGLLAAVIFAIVAIILAVQSQLALAAVFGVLVLAALGTIPVATRSEQK	3226	no	27.76	PF11982.8	Domain of unknown function (DUF3483)	2.6e-06
WP_086837411	Nostoc sp. RF31YmG	Nostoc	137	WP_086837411_2	2	MLHQIRTPNFNQANFISCKVYT	1815	yes	-4.16	none	none	none
WP_096594214	Calothrix sp. NIES-2098	Calothrix	137	WP_096594214_3	3	MLHQLGIPNVMKLNFIELKGCQFEKLSSSINR	1817	yes	-2.28	none	none	none
WP_096547181	Staphylococcus delphini	Staphylococcus	138	WP_096547181_1	1	MTQIVLVSHSDKIAEGTQELLAQMAQDVTVVAIGGIEGEIGTSFDDISAVLNDIDDDAICFFDIGSSEMNLDMAIEMYTGTHRIEKVDAPIVEGSFIAAVALSTGQTIDEAIASVDEAF	5688	yes	58.96	PF03610.16	PTS system fructose IIA component	1.5e-25
WP_162681093	Staphylococcus sp. MI 10-1553	Staphylococcus	138	WP_162681093_1	1	MTQIVLVSHSDKIAEGTQELLAQMAQDVTVVAIGGIEGEIGTSFDDISAVLNDIDDDAICFFDIGSSEMNLDMAIEMYTGTHRIEKVDAPIVEGSFIAAVALSTGQTIDEAIASVDEAF	6017	yes	63.81	PF03610.16	PTS system fructose IIA component	1.5e-25
WP_102116354	Pectobacterium aquaticum	Pectobacterium	139	WP_102116354_1	1	QVVGCNGGAQAQTYFPSIGHCAAAQAQTPPITHPQDCGVSWNCATKPPKA	1207	yes	0.95	none	none	none
WP_110163988	Pectobacterium carotovorum subsp. carotovorum	Pectobacterium	139	WP_110163988_1	1	TQVVGCNGGAQAQTYFPSIGHCAAAQAPAQAQFPTLSLQCAQVTTGLLTQVVGCNGGAQAQTYFPSIGHCAAAQAQTPPITHPQDCGVSWNCSTKQPNAQTYFPSIGSC	1176	yes	12.47	PF07586.11	Protein of unknown function (DUF1552)	1.2e-05
WP_058047489	Streptomyces sp. MBT76	Streptomyces	140	WP_058047489_4	4	MKTGNLAKKAAAVLVPGVSLMVFALPGTAAAASAPAEVRAVHGLQGLHVLQGLQGLQGLCGIPAKVVDRLPVCHRVNGWQ	7938	yes	25.14	PF17352.2	Male Flower Specific protein 18	1.2e-06
WP_120754718	Streptomyces klenkii	Streptomyces	140	WP_120754718_4	4	MTGKFAKKAAAVLVPGAFLGAFALPGTAMAAPAAPVAADVHAVSAVHGLCGIPVKLVDRLPVCHRVNGWQ	7781	yes	27.19	none	none	none
RCJ31639	Nostoc minutum NIES-26	Nostoc	141	RCJ31639_1	1	MDAKLIFEYDRNGDILYINKCSPYPEQESEEIEYGIVARLNPSTGEIENLEILFFSKRLSEKTLFELPVIADLRLATASL	4190	yes	44.21	PF10049.9	Protein of unknown function (DUF2283)	5.1e-12
WP_087542717	Nostocales cyanobacterium HT-58-2	Nostocales	141	WP_087542717_6	6	MHAKLHFEYDRSADTLYINKLPPYPEQEPAEIEYGVIARLNPTTGAIENLEILFFSERLSEKPLLELPLLADFHFVPTA	6593	no	15.93	PF10049.9	Protein of unknown function (DUF2283)	4.4e-10
RNJ67588	Leptolyngbya sp. IPPAS B-1204	Leptolyngbya	142	RNJ67588_1	1	MANNLSELQPIGSSLLFGTESFLSALSEEDESVITGGRGSNSSRPRRRRPRRRPRRRRPARSVSRT	238	yes	26.04	PF02377.15	Dishevelled specific domain	3.2e-07
WP_088888836	Leptolyngbya ohadii IS1	Leptolyngbya	142	WP_088888836_2	2	MDKNFVQDLNPAGFALFSGAENFLQDLSEEEESTISGGRRSNSRSRRPRRRPRRRPRRRPARSVSRS	295	yes	25.15	PF07420.11	Protein of unknown function (DUF1509)	8.2e-05
WP_010996620	Nostoc sp. PCC 7120 = FACHB-418	Nostoc	143	WP_010996620_2	2	MQTKYLAKIFVTLRPSVLDPAGVAVQSGLLQMGYDNVDHVRIGKYIELNITTSDEAKARQDLNRICDQMLSNPVIENYRFDLIEVETQTGVF	7575	yes	31.47	PF02700.14	Phosphoribosylformylglycinamidine (FGAM) synthase	2.7e-33
WP_096680266	Nostoc sp. NIES-2111	Nostoc	143	WP_096680266_3	3	MQTKYLAKIFVTLRPSVLDPAGVAVQSGLQQMGYDNVENVRIGKYIELTITTNDKTKAHEDLDRICDQMLSNPVIENYRYDLIEVETQTGVF	7689	yes	25.27	PF02700.14	Phosphoribosylformylglycinamidine (FGAM) synthase	8.9e-35
WP_070396421	Moorea producens PAL-8-15-08-1	Moorea	144	WP_070396421_1	1	MSTVAYIKDSEFDALLTSEVPVVVDFTAPWCGPCRKIGPLMDKLSEEYKDRVKVVKIDIDADKATAKKYSIRSIPAVLIFKGGEVVETIVGVADYEKFTAALEQQL	6571	no	44.29	PF00085.20	Thioredoxin	1.9e-31
WP_096681247	Nostoc sp. NIES-2111	Nostoc	144	WP_096681247_7	7	MTNDAVAYVQENEFETLLGEEKVLVVDFTATWCGPCRLVSPLMDQLADEYKDRVKVVKVDVDNNKPIFKRFGLRSIPAVLIFKNGELVEKIVGVSPYEQFSNAVDKLVEI	7732	yes	42.87	PF00085.20	Thioredoxin	1e-29
WP_094261964	Microbacterium sp. Yaish 1	Microbacterium	145	WP_094261964_2	2	MSLEGVDVLDERSTVLCDGDVGRATDEVEVVALLRRERVAELVELGREFSQPAALRVAQHLELGVEIDGVKNE	1252	no	11.02	none	none	none
WP_146082522	Rathayibacter sp. AY2B3	Rathayibacter	145	WP_146082522_3	3	MRLERVDVFDQLLAVLGDSDVGGAADEVEVVALLRRERVAELVELHRELGESAALRVAEDLEFGVEVDGAHNCRHEFSFAEVP	1250	no	7.08	none	none	none
WP_068099584	Rhodococcus sp. PBTS 1	Rhodococcus	146	WP_068099584_4	4	MAALTSTTRPQVQDTDTTLAAPDEAELVRLAGAGAARAGRVRGSVPIGLPTTTCPTWSCV	7171	yes	19.64	none	none	none
WP_068150862	Rhodococcus corynebacterioides NBRC 14404	Rhodococcus	146	WP_068150862_4	4	MAALTSTTRPQVQDTDTTVAAPDEAELVRLAGAGAARAGRVRGSVPIGLPTTTCPTWSCV	7190	yes	20.69	none	none	none
WP_073619916	Calothrix sp. HK-06	Calothrix	147	WP_073619916_2	2	MQNEINNAVELSFDELDTVAGGLAISLGDIKGFASDASNSFSQKNLGVGQQTFAGPGGSYTGSVTSLQDIFSNAGQAIAAK	4434	no	38.09	PF04604.13	Type-A lantibiotic	2.6e-05
WP_073619916	Calothrix sp. HK-06	Calothrix	147	WP_073619916_3	3	MNNATNTNAVELSFDELDTVAGGLAISLGDIKGFASDASNSFSQKNLGVAQQTFAGLSGSYTASVVQLQDIKSDAGQAIAISF	4090	no	35.36	PF04604.13	Type-A lantibiotic	1.8e-05
WP_130690339	Rhizobium leguminosarum bv. viciae	Rhizobium	148	WP_130690339_1	1	MKRNRFTDEQIIGILKEHEAGTPVAELCRKHGVSDASIYKWKAKFGGMEVSEAKRLKTLEDENTKLKRLLADAMLDNAALKDLLGKKW	6371	yes	51.93	PF01527.20	Transposase	1.1e-26
WP_131076036	Xanthomonas oryzae	Xanthomonas	148	WP_131076036_1	1	MKKRFSEEQIIGFLREAEAGMPIKDLCRRHGFSEASYYLWRSKFGGMSVPDAKRLKDLEAENTRLKKLLAEQVFQNDLIKEALQKKW	5423	no	51.48	PF01527.20	Transposase	9.5e-26
AVH79456	Roholtiella [Tolypothrix] sp. PCC 7415	Roholtiella	149	AVH79456_5	5	MNFNDFPFVMSMIALLIGMTFLILSDYIAAGVWLCYGLATFLVNKVGSSNMSNLSRPEVILAWATMVGFISLFLLQLHRDYVAR	1199	yes	28.34	PF12676.7	Protein of unknown function (DUF3796)	6.6e-05
TVP63782	Nodularia sp. (in: Bacteria)	Nodularia	149	TVP63782_6	6	MNFNDFPTVMSIIALLIGITFLILSDYIAAGVWLCYGLATLLVNKVGSSNMDNFSRIDVIIAWATIVSFISLLLFQLHRDFVAR	1214	yes	24.6	PF18169.1	SMODS and SLOG-associating 2TM effector domain 6	0.00023
WP_093619522	Actinoplanes philippinensis	Actinoplanes	150	WP_093619522_6	6	MTKNSRHLVMPTILAAAAIAFTGTQITAPQPTTSATGTTQPVVVPTDLPGVPLDPKQPITHDWPW	4949	yes	32.6	none	none	none
WP_109595189	Actinoplanes xinjiangensis	Actinoplanes	150	WP_109595189_6	6	MTKNPRHLVMPTILAAAAIALTGAQLAAPHVTASATGTTPPPVILPTDGPGVPTDPKQPITNDWPW	4289	yes	34.55	none	none	none
KQP70226	Microbacterium sp. Leaf288	Microbacterium	151	KQP70226_1	1	MTQDDAFAADLLRGHTDTIVLGVLRRGDAYGFEIYKAIRDATGGDHEIKEATLYATYRRLEKDGLVESYWGDESQGGRRKYYRITDAGRAVFRGNVAAWTATRRIIDSLLDVKESQQ	5906	no	67.77	PF03551.14	Transcriptional regulator PadR-like family	2.5e-26
WP_045296661	Microbacterium trichothecenolyticum	Microbacterium	151	WP_045296661_1	1	MTQDDAFAADLLRGHTDTIVLGVLRRGDAYGFEIYKTIRDATGGDHEIKEATLYATYRRLEKDGLVESYWGDESQGGRRKYYRITDAGRAVFRGNVAAWTATRRIIDSLLDVKESQQ	5908	no	71.88	PF03551.14	Transcriptional regulator PadR-like family	4e-26
AYJ47579	Rhodococcus sp. P1Y	Rhodococcus	152	AYJ47579_1	1	MGVYKFRGVLTVAKGKRTFQPNNRRRARVHGFRLRMRTRAGRAIVSARRGKGRKELTA	4002	yes	10.89	PF00468.17	Ribosomal protein L34	2.8e-23
WP_026723183	Fischerella sp. PCC 9431	Fischerella	152	WP_026723183_3	3	MRRTLEGTNRKRKRTSGFRARMRTPDGRNVIRARRKRGRYRLSV	7079	no	4.97	PF02993.14	Minor capsid protein VI	0.00032
WP_138989358	Larkinella sp. C7	Larkinella	153	WP_138989358_1	1	MDRMGFRYKQAADQDESLNGNFRKNTGILPLNLQKTNSKFTNSDHGFIVKGYRKGVTFIDLNN	1883	yes	4.98	none	none	none
WP_150881471	Larkinella sp. MA1	Larkinella	153	WP_150881471_1	1	MDRMGFRCKQAAAYDESLSGNSRENTGIIPLNLQRTNGKFTNSDHGFLVKWYRKVLTFVELNN	1890	yes	-0.6	none	none	none
WP_006622760	Arthrospira platensis C1	Arthrospira	154	WP_006622760_12	12	MKTYSASGDRTVVGYITGKKGQYEVFHRSPKSHDLYFYDSFMNRSTGFRVNSNGNYIGPDGAAYYNNPSVIAAIQNRYNLGKYS	6688	no	19.76	none	none	none
WP_006622760	Arthrospira platensis C1	Arthrospira	154	WP_006622760_11	11	MRTYSASGDRTVVGYITGKNGQYEVFHRTTKDLFFQNTAGGVRTGFRVHSNGKYVAPDGTIYHNNSSIIAAIQNKYDLGRYSG	6969	no	20.12	none	none	none
WP_016898474	Staphylococcus capitis	Staphylococcus	155	WP_016898474_2	2	MVVHHQYLRPFLIQLLGVPLNAVNQ	1139	yes	1.62	none	none	none
WP_030061393	Staphylococcus capitis	Staphylococcus	155	WP_030061393_3	3	MVVHHQFLHPFLIQLLGVQLNAVNHQ	1144	yes	-1	none	none	none
WP_156664522	Mycobacterium sp. 852002-51057_SCH5723018	Mycobacterium	156	WP_156664522_1	1	MVRAPRWYCVVVGMFLAVRAVSTLAAGGNFGLPGDGWRAVWQLTLVVLLMIGAAEPRAAWPAAATVGAVYAVATGLEAFHGADLLGVVPVDMRDRIVHPLLAILAAASLLLAWRRADAVS	3618	no	32.97	PF14325.6	Domain of unknown function (DUF4383)	0.013
WP_156664522	Mycobacterium sp. 852002-51057_SCH5723018	Mycobacterium	156	WP_156664522_2	2	MVRASQWYCVVVGLFLAVRAASTLAVGANFELPGNGWRAIWQLVLAALMLIGVARPRAAWPSVAVVGVVYAVATGLDAFHGDDLFGIVPVDMRDGIVHPLLAIVAALTLLLAWRRADAVT	75	no	24.37	PF14325.6	Domain of unknown function (DUF4383)	0.0071
WP_015111489	Nostoc sp. PCC 7107	Nostoc	157	WP_015111489_1	1	MAKIQFSRGLDENVLPDVRLTRSRSGDTGTATFIFTNPKILSQSSSEEVTGMYMLDEEGEIITREVKARFVNGKAEALEAVHIMKSADEWDRFIRFMERFAQANGLEFSKS	6558	no	37.81	PF03912.14	Psb28 protein	6.3e-49
WP_096583741	Anabaenopsis circularis NIES-21	Anabaenopsis	157	WP_096583741_2	2	MAKIQFSRGLDENVLPDVRLTRSRSGDTGTATFIFTNPKILDQGSTEEVTGMYMLDEEGEIITREVKARFVNGKAEALEAVHIMKSVDEWDRFIRFMERFAQANGLEFSKS	6522	no	40.94	PF03912.14	Psb28 protein	9.8e-49
WP_061955677	Arthrobacter sp. EpRS66	Arthrobacter	158	WP_061955677_6	6	MTVMAMRFQAMRFGQRLGQEGSDGVSHGDANEEQSEISKVLLQLRGLGWAILRGVGFRHCFCPFKDV	1090	no	8.91	none	none	none
WP_131089594	Arthrobacter sp. S41	Arthrobacter	158	WP_131089594_4	4	MTVMAMRFQAMRFGQRLGEEGGDGVSHGDAQEEQAEISKVLLELRGFGRAILRGVVFSHCSCPFKDVVTRFRN	1089	no	14.6	none	none	none
WP_061955677	Arthrobacter sp. EpRS66	Arthrobacter	159	WP_061955677_3	3	MDESPLPIITDTTGLGVGYRVLWRLKYLGLSIFGPAERRVDSSPRERIKWDRAMKVKAAHEAAGTQPDDQTLYTVSRLEPRRRPQ	6507	no	22.36	none	none	none
WP_131089594	Arthrobacter sp. S41	Arthrobacter	159	WP_131089594_3	3	MDESPLPIIADTTGLSIGYRVLWRLKYLGLSIFGPAERRIEASPRERIKWDRAMRVKAAHDAAGTQPDEQTLYTVSRLESRRRPQ	6303	no	21.61	none	none	none
WP_070396036	Moorea producens PAL-8-15-08-1	Moorea	160	WP_070396036_2	2	MSTDFITNHDNNPKKQRIKCIKGSPEAVTKTIYGLYALGYGSVSDWSPLQPTGIPGQVISFATKYQTWR	5773	yes	13.82	none	none	none
WP_071107270	Moorea producens JHB	Moorea	160	WP_071107270_3	3	MSTDFLPNHDNNPKKQRIKYIKGSPEAVTKTIYGLSALGYGSVYDWSPLQPTGIPGQVISFATKYQTWR	5298	yes	7.59	none	none	none
WP_016863105	Fischerella muscicola SAG 1427-1 = PCC 73103	Fischerella	161	WP_016863105_2	2	MSIIFQIALLALVLVSFAMVIGVPVAYATPQNWNDSKKLLWLGSGAWIGLVVLVALLSFFVV	4993	yes	18.79	PF01737.17	YCF9	2.2e-32
WP_017311237	Mastigocladus laminosus UU774	Mastigocladus	161	WP_017311237_3	3	MSIIFQIALLALVLVSFAMVIGVPVAYATPQNWNDSKKLLWLGSGTWIGLVVLVALLSFFVV	4858	yes	13.87	PF01737.17	YCF9	3e-32
WP_096590410	Calothrix sp. NIES-2098	Calothrix	162	WP_096590410_1	1	MSNSVITVTVKLFAAYQEAYKTSELVLEFPNGTPVRAVCDRLIAEHPELRQLRDITRFGINLIFVEPDTPLQNGDEVVLIPPVSGG	6278	no	28.21	PF02597.20	ThiS family	6.7e-20
WP_096590413	Calothrix sp. NIES-2098	Calothrix	162	WP_096590413_1	1	MSNSVITVTVKLFAAYQEAYKTSELVLEFPNGTPVRAVCDRLIAEHPELRQLRDITRFGINLIFVEPDTPLQNGDEVVLIPPVSGG	3271	no	28.21	PF02597.20	ThiS family	6.7e-20
WP_062451377	Rhizobium sp. Leaf262	Rhizobium	163	WP_062451377_3	3	MARVTGLEPATSGVTGRHSNQLSYTRTFPKDWPKPVLRTRLGCSLSG	5215	yes	4.61	none	none	none
WP_067652746	Agrobacterium bohemicum	Agrobacterium	163	WP_067652746_4	4	MARVTGLEPATSGVTGRHSNQLSYTRALFRIMRSVVFEEGMARVTGLEPATSGVTGRHSNQLSYTRTFLLKTGLDPPYELASAVR	5564	yes	11.39	PF14486.6	Domain of unknown function (DUF4432)	0.00012
WP_017743137	Scytonema hofmannii PCC 7110	Scytonema	164	WP_017743137_1	1	MSEQISEPTSEQSLEERHKLYCELIDKLLRCPNGQEPEVLEAHLELIDAGLIQTMLQVATGFAHQGNQDGAKFLIHVTKELSKQLGFYPEIPNSTEEGKE	4242	yes	46.09	none	none	none
WP_155752488	Scytonema sp. UIC 10036	Scytonema	164	WP_155752488_1	1	MSEQISEPISEQSLEERHRLYCELIEKLLRCPNGEEPEVLEAHLDLIDPGLIQTMLQVATGFAHQGNQDGAKFLIHVTKELSKQLGLYPEIPNSTEVGKGAIDNNAVD	4272	yes	50.59	none	none	none
WP_047015652	Streptomyces sp. CNQ-509	Streptomyces	165	WP_047015652_3	3	MPFACPLPRKCTREATFSGTTSANFVESVLAALVTASRLVSAAASAALRTAGDSLNCCAAFRNCS	864	no	-2.1	none	none	none
WP_051642643	Streptomyces sp. CNQ-525	Streptomyces	165	WP_051642643_3	3	MRAPRPGRGQVFVVPQSSGSSRRPRLPFACPFPWRKWTRAATFSGTTSANFVESELAALVTASRLVSAAASAALRTAGDSLNCCAAFRSCS	2115	no	-0.94	none	none	none
WP_015116255	Rivularia sp. PCC 7116	Rivularia	166	WP_015116255_1	1	MSTYDLIYKTVRQIPVGKVATYGQIADLAGLHGKARLVGYAMFQVDRDVNDIPWHRVINAKGEISYSTVREGGDYLQKQMLEEEGIEFNSAGKINLNQYQWQPNFC	2222	yes	38.96	PF01035.20	6-O-methylguanine DNA methyltransferase, DNA binding domain	1.4e-26
WP_096659345	Calothrix parasitica NIES-267	Calothrix	166	WP_096659345_2	2	MSTYDLIYKTVRKIPAGKVATYGQIADLAGLYGKARLVGYAMFHVDTTSDDIPWHRVINAKGEISYSNLREGGDYLQKQLLEDEGIEFNSAGKVNLSQYRWEPSI	2183	yes	40.33	PF12414.8	Calcitonin gene-related peptide regulator C terminal	7.5e-06
WP_006195640	Nodularia spumigena UHCC 0039	Nodularia	167	WP_006195640_3	3	MAKIEIYNLYPSNEQQLLNEITEGEIKTVEGREGSTVTAGNSDINEQPLGNTVDQNLDNLLYRLRNQMGIVIFGARNQFNERLNSF	6034	yes	39.89	none	none	none
WP_089091039	Nodularia sp. NIES-3585	Nodularia	167	WP_089091039_6	6	MARIEIDDLYPSNNQKLLNEITDREMQTVEGREGNTVTAGISDVNEQSLTHMLEQNIDNLLFHLRSQMGVVILGARNQFNQGFSSF	4587	yes	25.58	PF04604.13	Type-A lantibiotic	8.6e-06
WP_016864763	Fischerella muscicola CCMEE 5323	Fischerella	168	WP_016864763_5	5	MKTILNKMRLWLDSFEVRDRKIAYFLCKLIPSQCPFERDIKLFGHTLCHLPPLCKLNPLYEQLVGLRLQALCYLAGEYKHITTINDLAHT	3250	no	15.7	PF06967.11	Mo-dependent nitrogenase C-terminus	1.2e-40
WP_106218514	Cyanosarcina cf. burmensis CCALA 770	Cyanosarcina	168	WP_106218514_2	2	MMTLTHLILKFDLLQLIRQWLEGVEVHNSKLAKFLCKLIPASCPFERDIKFFDRILFHIPALCKLNPFYEQLMNIRFRSLSYLADKCGEDLIISC	1988	yes	33.98	PF06967.11	Mo-dependent nitrogenase C-terminus	2.5e-44
WP_068028504	Nocardia mexicana	Nocardia	169	WP_068028504_4	4	MKVSTGTVVAIVAAVIALVIVFLGGEVTVAAAVAVAGGLIGAVVGKNFNRDQNDRGIR	3872	yes	15.56	PF09605.10	Hypothetical bacterial integral membrane protein (Trep_Strep)	1.6e-06
WP_084520237	Nocardia mexicana	Nocardia	169	WP_084520237_4	4	MKVSTGTVVAIVAAVIALVIVFLGGEVTVAAAVAVAGGLIGAVVGKNFNRDQNDRGIR	2527	yes	15.56	PF09605.10	Hypothetical bacterial integral membrane protein (Trep_Strep)	1.6e-06
WP_014173637	Streptomyces milbemycinicus	Streptomyces	170	WP_014173637_1	1	MGELLPFLMVVASLAVVMGFFTWLAVLVRRRGVAGSAFRSIVDVYDQAWHATGHDSHYEIQVQAERKLPIPSPDDPWRPDRGATARPGERGGRPVPSRPRPGRRGLGRRRMWRRR	2285	yes	29.14	none	none	none
WP_089505437	Streptomyces sp. NBS 14/10	Streptomyces	170	WP_089505437_2	2	MGGLLPFLMVVGSLAMVMAFFTWLAVLVRRRGVAGSAFRSIVDVYDQAWHATGHDSHYEIQVQAERKLPIPSPDDPWRPDHGMITRPASPSRGGARPVPR	3283	yes	32.41	none	none	none
WP_010996620	Nostoc sp. PCC 7120 = FACHB-418	Nostoc	171	WP_010996620_3	3	MEILVEKGVNVVMKVGDRVCVKESVVVYHHPEHRGKAFDLKGSEGEIVEIVTQWQGRPVSANLPFLIQFSKKFKAHLRENELEVI	2657	no	26.98	PF08940.11	Domain of unknown function (DUF1918)	2.2e-05
WP_096680266	Nostoc sp. NIES-2111	Nostoc	171	WP_096680266_2	2	MEVLVEKGVNVVMKVGDRVSVKESVVVYHHPEHRGQAFDLKASEGEIVEIVTQWQGRPVSANLPFLVQFGKKFKAHLRENELEVI	2687	no	31.46	PF02941.15	Ferredoxin thioredoxin reductase variable alpha chain	6.7e-39
WP_010996620	Nostoc sp. PCC 7120 = FACHB-418	Nostoc	172	WP_010996620_4	4	MNENLPYILPVPQPQAEDTFAAYQTTHQFYYEVQKRSEFQRHCEWYYATAEQHRQELERMRGEVNIFSWFRRSSKI	2421	yes	18.98	none	none	none
WP_096680266	Nostoc sp. NIES-2111	Nostoc	172	WP_096680266_4	4	MRENLPYILPTPQPQAEETFAVYQTTHQFYYEVQKRSEFERYCQWYYETAEQNRQELERMRGEVNIFSWFRRSSKM	2450	yes	19.56	none	none	none
WP_051837683	Streptomyces sp. NRRL F-2580	Streptomyces	173	WP_051837683_6	6	ARELVDQGTPIEAACRIIILEDQLEEAQRINAEYRRAAESSAPPPSA	3907	yes	17.51	none	none	none
WP_155387558	Catellatospora paridis	Catellatospora	173	WP_155387558_1	1	MFGDENYPAYTMGRAAEIIGATPDFLRKLDELKLINPLRSSGGHRRYSRYQLRLAARAREMVDQGTAVEAACRIIILEDRWSIRAPLWKPRAGSSSSRTNSKKPSARTSSAQPTDLPGR	5067	yes	11.67	PF13411.6	MerR HTH family regulatory protein	1.3e-12
WP_095739934	Rhodopirellula sp. SM50	Rhodopirellula	174	WP_095739934_1	1	MTDERAQAALHAAQHAAMAAHHAAMAAQCAAIAAGAPQQGTGGGPGQMQGPPMGYQYPGQNPYTQQQPGPHPMTVW	5	yes	10.78	none	none	none
WP_145385118	Planctomycetes bacterium Enr13	Planctomycetes	174	WP_145385118_2	2	MTDERAQAALHAAQHAAMAAHHAAMAAQCAAIAAGAPQQGTGGGPGQMQGAPMGYQYPGQNPYMQQQPGPHPMTVW	4	yes	17.54	none	none	none
TAE59458	Nostocales cyanobacterium	Nostocales	175	TAE59458_9010	9010	MQVNELTIEQLKDLIRETVRETIEELLTDPDTNQTIKDNFKQELLAIRKRRETGVRGISTAEVMQRLGLENR	11155	yes	33.56	NF033456.1	RiPP_CCRG-2: CCRG-2 family RiPP	1.1e-06
WP_015078657	Anabaena sp. 90	Anabaena	175	WP_015078657_8	8	MQIKEMTAEQLQNLIRTTVDEMLDEYFGDPDEDKEIKESFKQSLLEIRRKRQEGRPTIPLAEVYKRYGIER	7474	no	29.2	none	none	none
WP_018486514	Rhizobium leguminosarum bv. viciae Vc2	Rhizobium	176	WP_018486514_2	2	MDLVKVADGLDDSVLADEIKHLFLDGPISDALAQRAESHTFVRLSETAVAKLSRHAASPPAEEFVGEYFAAHSGGGLCRSDICMSKQICHTDVCPPQVEEK	1106	yes	24.96	none	none	none
WP_168880027	Rhizobium sp. P28RR-XV	Rhizobium	176	WP_168880027_5	5	MDLVNAADGSDHSLLIDEIKHLFLDGPISDALGQRAESHTFVRPSETAVAKLSLHAASPPAEEFVGEYFAAHSGGGLCRSDICMSKQICHTDVCPPQVEEK	1104	yes	12.32	none	none	none
WP_079291565	Cylindrospermopsis raciborskii CENA302	Cylindrospermopsis	177	WP_079291565_3	3	MDCNILVLLLIILQVLLVQISIFWDLGL	3964	no	-9.62	none	none	none
WP_082604641	Cylindrospermopsis raciborskii GIHE 2018	Cylindrospermopsis	177	WP_082604641_3	3	MDCNILILLLVLLQVLLVQISIFWELGAIRTIKFQYRIRW	3863	no	-8.36	none	none	none
WP_015207763	Cylindrospermum stagnale PCC 7417	Cylindrospermum	178	WP_015207763_2	2	MDMEDADMEATVMEAIGMEATDMEGAGRVANGGFTTGVVPINQGTTRPPIETGLLALQLLDPRHL	3943	no	20.64	none	none	none
WP_015207767	Cylindrospermum stagnale PCC 7417	Cylindrospermum	178	WP_015207767_2	2	MDMEDADMEATVMEAIGMEATDMEGAGRVANGGFTTGVVPINQGTTRPPIETGLLALQLLDPRHL	7862	no	20.64	none	none	none
WP_049976882	Streptomyces leeuwenhoekii	Streptomyces	179	WP_049976882_2	2	MRTPCAGTDGDGTGQREGGTA	4541	yes	-2.59	none	none	none
WP_052808529	Streptomyces cyaneogriseus subsp. noncyanogenus	Streptomyces	179	WP_052808529_3	3	MRPPCAGTDGDGTGQREGGTA	4539	yes	-2.98	none	none	none
WP_012409362	Nostoc punctiforme PCC 73102	Nostoc	180	WP_012409362_1	1	MDNNNWLQQLMMMGLGTTSLVAEKLRQVSDDLVKDGKLNPEQAKAVIDDIAQQLKSEQGNWDVQMQRQMRNMMQDLGVARQSEVDELRGRIDRLERQLRDLENKLWR	1718	yes	49.89	PF05478.11	Prominin	5.8e-06
WP_114082527	Nostoc sp. ATCC 53789	Nostoc	180	WP_114082527_1	1	MDNNNWLQQLMMMGLGTTSLVAEKLRQVSDDLVKDGKLNPEQAKAVIDDIAQQLKSEQGNWDVQMQRQMRNMMQDLGVARQSEVDELRGRIDRLERQLRDLENKLWR	2991	yes	48.23	PF05478.11	Prominin	5.8e-06
WP_124142959	Okeania hirsuta	Okeania	181	WP_124142959_2	2	MPQQFNVTAESNGHKPLETDLIKLEKSSRLG	2100	no	2.77	none	none	none
WP_124155194	Okeania hirsuta	Okeania	181	WP_124155194_3	3	MPQQFNVTAESNGHKPLETDLIKLEKSSRLG	5574	no	2.88	none	none	none
WP_006619051	Arthrospira platensis YZ	Arthrospira	182	WP_006619051_3	3	MYGFVWEGEMATSLSTPTRDKAKCMKINAIIHPAEEGGYWAEVPALRGCITEGDTLEEVTQNLKDAVEGWLSVANNSPKNIEPTDKIVEIAV	5337	no	27.07	PF15919.5	HicB_like antitoxin of bacterial toxin-antitoxin system	3.7e-13
WP_006622760	Arthrospira platensis C1	Arthrospira	182	WP_006622760_10	10	MKIKAIIHPAEEGGYWVEVPALPGCITEGDTWEEVTQNLQDAVEGWLSVANNSLKKTEPTDEIVEKQGWFLQRITGSH	5405	no	20.13	PF15919.5	HicB_like antitoxin of bacterial toxin-antitoxin system	1.1e-14
WP_096604516	Calothrix sp. NIES-2100	Calothrix	183	WP_096604516_2	2	MLVISKKLLFFFKAHSQIAA	4414	yes	0.24	none	none	none
WP_124200676	Pseudomonas aeruginosa	Pseudomonas	183	WP_124200676_2	2	MVEVSRKLLQWFSVHSVVPGGMFT	4301	no	-12.04	none	none	none
WP_067598320	Nocardiopsis listeri NBRC 13360	Nocardiopsis	184	WP_067598320_1	1	MDRRELHERVSALALEVKDMVVGGPGWEPDGTTSVRLDFMDAFTLFQFGVYLEEEFDVLLVEEVSRMTDHTTEKVTETVARALTEQT	6271	yes	67.39	none	none	none
WP_087103312	Nocardiopsis sp. JB363	Nocardiopsis	184	WP_087103312_1	1	MDRRELHERVSALALEVKDMVMGGEGWEPDGTTSVPLDFMDAFTLFQFGVYLEEEFDVLLVEEVVRSSDHTTEKVTETVARALAEQT	6328	yes	73.42	none	none	none
WP_015140719	Nostoc sp. PCC 7524	Nostoc	185	WP_015140719_2	2	MSIYVGNLSYSVTQDDLTKVFAEYGAVTRVQLPTDRETGRVRGFGFVEMESSAAEDAAIQALDGAEWMGRVMKVNKARPREEKSTRSGGGSWGKNNGGYSRQY	2973	no	41.38	PF16842.5	Occluded RNA-recognition motif	4.3e-06
WP_096681247	Nostoc sp. NIES-2111	Nostoc	185	WP_096681247_1	1	MSVYVGNLSYDVTEDSLNAVFAEYGSVKRVQLPTDRETGRMRGFAFVEMNSDAEETAAIEALDGAEWMGRDLKVNKAKPKEDRGSFGGGGNRGSYGGRNRY	6813	no	57.6	PF11835.8	RRM-like domain	1.7e-05
OGQ08743	Deltaproteobacteria bacterium RIFCSPHIGHO2_02_FULL_40_28	Deltaproteobacteria	186	OGQ08743_2	2	METKKMPPIHPGEILLEEFLKPLKISQTRLARGIGVPYRRVNEIVQSKRSITPDTALRFSVYFKTTPEFWMNLQIQYELRVLKQKLNKRYEKINPYSEHLERFL	1067	yes	27.06	PF01381.22	Helix-turn-helix	1.4e-12
WP_124970176	Aphanothece sacrum FPU1	Aphanothece	186	WP_124970176_3	3	MIPTNRIPTHPGVILLEEFLEPMNITQIALANHLNIPVQRINEIIKGKQEITPETAWLLAQAFKTTPQFWMNLQTNYDLALNRPKEIKQAIIA	2353	yes	33.61	PF13443.6	Cro/C1-type HTH DNA-binding domain	4e-05
AOX46105	Microbacterium sp. BH-3-3-3	Microbacterium	187	AOX46105_1	1	MGLDDKIKNAAQDIVGKAKEAIGNATDNDKLAAEGKADQVKADAKKAGENVKDTFK	7615	no	55.82	PF12732.7	YtxH-like protein	1.2e-05
WP_159529421	Streptomyces sp. Tu 3180	Streptomyces	187	WP_159529421_2	2	MAGDQKAKAKAEQAKGKAKEAAGRAVGNERLEAEGRAEQSKGDARQAKEKTKDVFRH	4808	no	36.73	PF05532.12	CsbD-like	3.2e-21
TKB91729	Nitrospira sp.	Nitrospira	188	TKB91729_3	3	MYHSNHLNSMEQTQGVEMVPGITDHQMILDTLSHPLQSPIRALQTFFGIALLAGSCSLPITTSLLFAAELFNQGAMIRAKVDEQLTAATGILGAIAGYLFGKEAKGPEAKQKSGEAGTT	3413	yes	19.14	none	none	none
TKB91729	Nitrospira sp.	Nitrospira	188	TKB91729_6	6	MQQTHGIEAVPRITGHHMILDALSRHTRSSIRALQTFLGIAILAGSCTLPITSLIFAPKLFDQGAVIRTKVDEQLNAATGVLVAIAGNLLGKTTKSPGTGQKPDATGTM	7309	yes	12.48	none	none	none
AFY52807	Rivularia sp. PCC 7116	Rivularia	189	AFY52807_5	5	MEGPFLNILALSALVLLVAVTGGVIYLTLMEWRDRRLLEQEKREMRRSSPKQR	6389	yes	16.28	PF12693.7	GspL periplasmic domain	8e-06
WP_118166682	Nostoc sphaeroides	Nostoc	189	WP_118166682_5	5	MESPFLSILTLVAVVLLVVVTGGIGYLTVADWRDRRRRDDDKRTSRSATPKRR	4841	yes	9.89	PF10660.9	Iron-containing outer mitochondrial membrane protein N-terminus	1.4e-05
WP_045869173	Fremyella diplosiphon NIES-3275	Fremyella	190	WP_045869173_3	3	MSVRYNQNNAPLVKVVYSQVKVNGKLQLVPLELYADGSLKRSQG	7759	yes	19.6	none	none	none
WP_073591536	Phormidium ambiguum IAM M-71	Phormidium	190	WP_073591536_7	7	MCTKYNKNNSLFVRIVYSKVKINGKVELVPLELYADGTVKKAG	3748	no	11.71	none	none	none
BAU44627	Leptolyngbya sp. O-77	Leptolyngbya	191	BAU44627_2	2	MRRWIAGVGAGVVCGTAGAMGVGAGLGHALPPPEDVPEEVLRTQIVLEGRSPVTGEPLTASEHATQQASRQTAIEEQPRDLPPEIRQTVMLLKLRRLLRPVLPFIF	21	no	27.94	none	none	none
WP_172358022	Thermoleptolyngbya sp. PKUAC-SCTA183	Thermoleptolyngbya	191	WP_172358022_1	1	MRRWIAGVGVGVVCGIAGAMGVEAGLGHALPPPEDVPEEVLRTQIVLEGRSPVTGEPLTASERATQQTSRQTAIEEQPRDLPPEIRQTVMLLKLRRLLRPVLPFIF	21	no	37.74	PF14449.6	Pre-toxin TG	0.04
WP_107961734	Sphingomonas sp. PP-CE-3G-477	Sphingomonas	192	WP_107961734_1	1	MTDIDKSALDSLSVAPDDKDAEGKSSGRDPRQEAGQDKSIGKRLQKNPDSADARLDNGLDESMDGSDPISATQPGSGTEPAKSSGYDEDAERALREKQA	6974	no	47.91	none	none	none
WP_128453384	Sphingomonas sp. UV9	Sphingomonas	192	WP_128453384_1	1	MTDIDKSALDSLSVAPDDTDAEEKSSGRDPRQEAGQDKSIGKRLQKNPDSVDARLDNGLDESMDGSDPLSATQPGSNREPAKSSGYDEDAERALREKQA	6908	no	46.73	none	none	none
WP_131076036	Xanthomonas oryzae	Xanthomonas	193	WP_131076036_2	2	MRSHFEDLLESKVVESFNLTDAMANDLAGESIDNITPTIVVTIAIITSASEC	1225	yes	24.73	none	none	none
WP_156170590	Luteimonas sp. FCS-9	Luteimonas	193	WP_156170590_2	2	MKSRFEDLLEAHVVESFNLTDAMANDLAGESTDNATPTTIWAIAIITSAAEC	1313	yes	17.28	none	none	none
WP_169264744	Brasilonema sennae CENA114	Brasilonema	194	WP_169264744_3	3	MRVSLRRIRALETLPQRWSHLTLPYRASLSLLRRGKDFSVAKSEGEVKGEMCVHRRLAKGSQCVAEPVLQEGFPP	53	yes	7.12	none	none	none
WP_169264746	Brasilonema sennae CENA114	Brasilonema	194	WP_169264746_3	3	MRVSLRRIRALETLPQRWSHLTLPYRASLSLLRRGKDFSVAKSEGEVKGEMCVHRRLAKGSQCVAEPVLQEGFPP	3030	yes	7.12	none	none	none
WP_123798532	Amycolatopsis keratiniphila	Amycolatopsis	195	WP_123798532_3	3	MHSEELFAAYHEFTTSTELSVASYGSHTGSRNTTTPTFLTDTADHAHAPRNNE	96	yes	15.55	none	none	none
WP_125690181	Amycolatopsis sp. WAC 04169	Amycolatopsis	195	WP_125690181_2	2	MHSDELFAAYAEFTTPADLSISPADSHAGSRNTATPTFLSYAETRPESERE	99	yes	14.86	none	none	none
WP_008180360	Moorea producens 3L	Moorea	196	WP_008180360_7	7	MQSSVLTKLIRWLQEELEIPRASIALALRQGEPSPNFLPMILWQYGLISLDQLDQIFDWLEAV	5794	yes	14	PF11165.8	Protein of unknown function (DUF2949)	4.6e-32
WP_096605992	Calothrix sp. NIES-2100	Calothrix	196	WP_096605992_7	7	MVIRNSDKQFLNFLHNELELSSADISVALRHQQMDNGPLPMLLWQYGLVDLEQLERIFDWLYEQS	3691	no	10.37	PF11165.8	Protein of unknown function (DUF2949)	1.9e-32
WP_045869173	Fremyella diplosiphon NIES-3275	Fremyella	197	WP_045869173_1	1	MPDFRAELAENLDESEWEWLIPHVKRDAVILVASGLDLLDVGVAIASDNIPQVQIWIDEQLITKPNPEQLGEWNANPQKRFQTLIVQPYVIVQEIANT	6286	no	46.45	PF10052.9	Protein of unknown function (DUF2288)	2.5e-39
WP_096594214	Calothrix sp. NIES-2098	Calothrix	197	WP_096594214_1	1	MPDLRAELAENLDEAEWEWLIPHVKRDAVIVVTQGLDLLDVGLAIASDNIPQVQLWIDEQLITKPSTEQLGEWNANPQKRFQTLIVQPYVLVQEMVNT	6436	no	46.07	PF10052.9	Protein of unknown function (DUF2288)	8.3e-41
WP_051840628	Streptomyces lavendulae subsp. lavendulae	Streptomyces	198	WP_051840628_2	2	MVMQISDEVTVVVMAGASVASEAASSSGVV	211	no	-0.58	none	none	none
WP_125821548	Streptomyces sp. W1SF4	Streptomyces	198	WP_125821548_3	3	MGTPSSDRGPGGVRRTGPGHWRIGAEGQQPQPTVIVMQISDEVTVVVMAGASVASEAASSSGVV	171	no	-4.33	none	none	none
TVP62142	Nodularia sp. (in: Bacteria)	Nodularia	199	TVP62142_3	3	MSSSGKSRQILQSIRNIPQQVMNYISEAVSRIFSPRDDDYPATGVQPFEGDPPDKNND	6025	no	10.62	none	none	none
WP_006196066	Nodularia spumigena CCY9414	Nodularia	199	WP_006196066_4	4	MSKSGKKQEILQSMRNIPQQVINYISEAVSRIFSPRDDNYPATGVQPFEGDPPDKKND	5568	no	11.17	none	none	none
WP_089126833	Tolypothrix sp. NIES-4075	Tolypothrix	200	WP_089126833_3	3	MDDRTKALQSLAAERWRVSLILSGVMMFIYFGFILLIAFNKPLLGSLVVPGLSLGILLGALVIISAWVLIFIYVRWANNNYDRKVARLTQK	2375	no	11.52	PF04341.12	Protein of unknown function, DUF485	2.4e-29
WP_089126836	Tolypothrix sp. NIES-4075	Tolypothrix	200	WP_089126836_3	3	MDDRTKALQSLAAERWRVSLILSGVMMFIYFGFILLIAFNKPLLGSLVVPGLSLGILLGALVIISAWVLIFIYVRWANNNYDRKVARLTQK	5737	no	11.52	PF04341.12	Protein of unknown function, DUF485	2.4e-29
WP_168880027	Rhizobium sp. P28RR-XV	Rhizobium	201	WP_168880027_1	1	MLCQHPLAFLRKDLTARDIATYEEAMSTRDGRLLMTTDLVLVRQKPGSAKGVTFLTIEDETGPGNVVVWPTLFERRSRWCSVPA	4969	yes	18.56	PF01336.25	OB-fold nucleic acid binding domain	6.2e-08
WP_168880029	Rhizobium sp. P28RR-XV	Rhizobium	201	WP_168880029_1	1	MLCQHPLAFLRKDLTARDIATYEEAMSTRDGRLLMTTDLVLVRQKPGSAKGVTFLTIEDETGPGNVVVWPTLFERRSRWCSVPA	1967	no	13.56	PF01336.25	OB-fold nucleic acid binding domain	6.2e-08
WP_052752730	Kordia zhangzhouensis	Kordia	202	WP_052752730_2	2	MRHDVLQKFLYKTEDSGRFLVTSKRTGVTYFVEPIDSGKPTNLWGDLDPATKKLTGDYGNKRRGAVLAEESLITEENGFQNISIFKGSPLGEIDRRDQLYATTKGI	6787	yes	50.83	none	none	none
WP_108116368	Kordia periserrulae	Kordia	202	WP_108116368_1	1	MRKEVLQRFLYKTEDSGRFLVTSKHTGVTYFVEPIDAGKPAKLWGDIDPATKKMTGDYGNKRRGAVLPENSLITEENGFQNISIIKGSPLGEIDRRDRLYELNDT	5225	yes	51.56	none	none	none
